# Supplementary material for: Full-length transcriptome analysis of Adiantum flabellulatum gametophyte
Source: PeerJ. 2022 Mar 9;10:e13079. doi: 10.7717/peerj.13079 (PMC8917799; doi:10.7717/peerj.13079)
Supplement: Supplemental Information 1 [file peerj-10-13079-s001.xlsx]

## Sheet: Table S1
Table S1 Information of primers used in qRT-PCR analysis
Gene ID	Gene Name	Primer sequence (5’ to 3’)	Annealing (℃)	Size (bp)	Gene Sequence
isoform_17547	Glutamyl-tRNA reductase (HemA)	F：CAGCTCCACGAGGCCTGTAA R：CAGGTGCTCGTCGTAATGGC	60	145	CAGCAGAAGAGGGTTTGCCCTAACGCACAGGCGATCCCTCTGCGGCAGGGTCTTTCTAGGAAGCAGAGCAGAGCAGAGCGACCTCCATGGCTTCAATGAGAGCTCCTGCATTTGTCTCGACTGATGACTGCGTCACGTTTGGTTCGCGTTCTTGTCCGTTCTTTAAAGTTTGCTCCTTGCCCAATGCAGGCGCTCTTCCTGCTTCTGGTCACCATCGCCGACATTTGAGCTTCCGGGCTAGCTCTGATGGCCCTCAATTACCTGCTAGCCATACTGCCAAGCTCTCGAGCCTTGCTGCCCTCGAACAGCTTAAGAATTCTGCTGCAAATAGGTACACCAAAGAGAGGAGCAGCATTCTTGTACTTGGATTAAGTGTTCACAATGCCCCTGTTGAAATGC…
isoform_31009	Glutamate-1-semialdehyde-2,1-aminomutase (HemL)	F：TTTAGAGACAGGGATGCCACT R：TGAGATTTCTTCCAAAACCAAC	60	116	AAGCTCTTGAGGTTTAGCGAGAGAGCGAGCGAGCGAGCGAGAGCTATGGCGACCCAAGTGCCTGCGAGATCCGCTCTTGCGTCGAACTGGGCAGGTTTGCGGCGTGGAGAGACAAATGCTGCCCAGCAAGTCTCTTCCTCTGCACTCCTCCCCTCACCCTCCAGATTTGAGGTCCGCATGATGGCTGTCTCTGTGGAAAAGAAGTTTGTCACTAAGAAGTCTGAGGAGGTGTTTACTGCTGCAAAGGAACTTATGCCTGGTGGTGTTAATTCTCCTGTCAGAGCTTTCAAGTCAGTTGGAGGCCAACCTATTGTCTTCGACAGAGTGAAGGGTTGCAGAGCATGGGATGTAGATGGAAATGAGTACGTGGACTATGTGGGAACATGGGGTCCGGCTATT…
isoform_34076	Porphobilinogen synthase (HemB)	F：CCCCTCACCCTCCAGATT R：CACCACCAGGCATAAGTTCC	60	149	AAAGATTTCCTCTGAGAAAAACTGAGACAGGTAGTGAGCGAGGCGGGGAGCGATGGCCCCTCCTACATTTGCTTCTGCAGCGTCGTCGTTGGCATCTTCACAAGCGCTCGGGGGCACCCAGCTTCTAAGATCATCCTCCCCAGCTGTGAGCGTTCGCCCTTGTTCCTCCTCTTGCTCCTCTCAACGCGCCTTGCCTTTGAAAATCAGGGCCTCCATCGCCACAGAGACCGCCCGAAAGCTTTCTGTGGAAGAATGCGAAGCTGCTGTTGTGGCAGGGAACTACCCCCCTGCTCCGCCACCCCCTGTTTCCGGCGACCCCCCACCAGGCACTCCTGTGATAACCCCCCAGAATTTGATGAAACGTCCTCGAAGAAACAGAAAATCTGTAGCCTTGCGTGC…
isoform_274635	Magnesium chelatase H subunit (CHLH)	F：TCATCTCTTCTCTCTCGCCC R：CCCACAATCACACAGTCGTAA	60	168	CAAAACCATGGTGAGGGCTTGCTGACTTGGCAAAGAGCAGTCTCATTGGATCACCCTCATAGCCGAAAGTAGGTTGGACACCAATGAAAACATTACCATACTGCTTCCCATAAATGAGAAGATTCTGGCCATCAGAGTTCAGATTTCCAGGAGCCTTGCCCCAGTTCTCCTCAAGAGCTTTGGAATAGGGGGTGAGCCTTTCATACTCGCGTACTGGCATTTTGTATGCGATATTCAGATCAGGACTATTGAACTTGGCCTCTTTGTCATGTATGATATCTTCAATTAGGCCTTCTGCTGTGTCTGGAAGGCCTTCCACATTGTAGCCATCATTCTTCAGATCTCTGAGCACACTGAAGATAGAAGCAAACACATCCAAATAAGCAGCTGTCCCTACAT…
isoform_37517	Magnesium chelatase D subunit (CHLD)	F：TGTGTATCCATTCACCGCTAT R：TGTTGATTTTCCAGTGCCTC	60	124	TACGGGGGAAAGACGTTATCCTTTTGCTGTTGCTGCTGAAGCAGTAGCCGTGTTTCTTCAGACCCGCTAGACTGCAGCCATGGAAGCTGCGTCCGCCACTTTCTTCCCTTCTTCCTCAGCTGGCATTGCTGCCCGCCGTCCATCGTCGTCTTGTCGATCTGAGCTGGTGGCCTGCTCTACTTTTCTTCAAGGTTCAAATTTGAGAAGTGAGAGAAGATTTCCTGCTGCAAGACAAAGTGTGCGTGGTTTTACTGTGGTGAGGAATGCAGCAAGCACGGTCCTTTCACCAGAGCAGGCCCCTTCTAAAGTCATATCCAAGGAGAACCAAAGACCTGTGTATCCATTCACCGCTATAGTGGGACAAGAGGAGATGAAGTTATGCTTACTTCTGAATGTGGT…
isoform_26255	Mg-Proto Ⅸ monomethyl ester cyclase (CRD)	F：TGGCTATTGCGATGGCGG R：TGGTGTAGAAGCGGGGCGT	60	243	CGCGAAAATGGCTATTGCGATGGCGGCCCTAACCTCCTCGTGCTCGTCAGAGTTCGCGGTTAGCCGCGTCTCACCTGCTTCTTCGTCCGCGCGGCTGGGCTCCATCTCTCTCACCCTCAAACCGTACCGTCTTTCCTCAACGGCGCTTTCCGCTCACAGAGTCTCCATGGACGCGTCTGTGGCAGAGAAACCCAAATCAGGTGCCAAGGAGTTGGCCAAGGACACTCTACTCACGCCCCGCTTCTACACCACTGATTTCGACGAGATGGAGCGCATGTTTAACAAGGAAATCAACAAGAATCTGAAACAGGAGGAGTTTGATGCTTTGCTCCAGGAGTTCAAGACGGATTACAACCAGACTCATTTTGTGCGGAACCCGGAGTTTCGGAAAGCCGCCGA…
isoform_35563	3,8-divinyl Chlide 8-vinyl reductase (DVR)	F：AAGCCTCCAAAGCAGATAGAA R：CCCAATCACGCAAAAAGTC	60	237	ACTCTTGAACCGGACAGCCACCCAGTCTTCAAGGGCGCGCGCGCGCACACAACCTGCAGGAAACTGCAAGCTTTTGGAGAGGCGTGCATAGTTTTGTGCGTGTGCTGGTGTGTGGAAGCGTACGTGCGTGGGGCTATGGCAGGCCTCATGCTTGCGCAGGCCCCATCTTTTCAGAATCCTGCATCCGCTCCCTCTTCGATTGACAAGCCCTCAGCAGGTGCTGAGCTATCCATTAGCTCTGCGTTCTGGGGCTCCTCCATCAAGCTCAACTCTTCTCATGCTGTTTGTAAAGCCTCCAAAGCAGATAGAAGAGTAGCTGGATTATCGGCAAGATGTGATGCCACAAAGGTTATGGCTGCTTCTACAGCTATGTCAGGGACTCCTGTAAGGTCAACCAGC…
isoform_30702	Protochlorophyllide oxidoreductase (POR)	F：AGAGGTATTTGGGCGAGTTT R：GTTGGAGCAGGTGAGGCA	60	124	AGAGAGCGAGAGAGGTATTTGGGCGAGTTTGTGGTCCAGATTTTTTCAAGGATTTGAGGGTGTTCTGAGCGGGTTGTGTAGTCTCGTCTTGCGATTGTGTTTTGCCTTTCATCAGCTGCCTCACCTGCTCCAACCATGGCGAGCTTAGCCAACTGCGCTGCAGCCTCTCATCTTGCTGCCAAAGAGAAATTGGTGAGCTCATCAGCAGAATCGACCTTTCTGGGATTACAACTTCACGGCCATGGGCAGAATGCAGTACGCATTGTCAACAAGGTGTCCAAGAGCCATGCCATGGCCGCTTCAATCAGAGCAAATGCAGTGGCAGCTCCGGTTGAGACTCTAAAACCAACTGATGGCAAGAAAACTATGACTAAATCTTACTGTATCATTACTGGTGCT…
isoform_8394	Chlorophyllide a oxygenase (CAO)	F：TACCGCAGAGTTTTGCTAAGA R：ACAGCCAGTAAGGAATGACG	60	228	AGTGGAGCGAGCCATTAGAGCAAGGGTTTCTTGTTACCATTTCCATTGATCTTCGTCGCTCTGGGCTTGTGTGTATCCGGAAGTTGTGCTGAGGTGTGCATGCTGCAGGGCCGTCCGTCTGGCGAAGACTTCTCCGTCTTTACGTACCGCAGAGTTTTGCTAAGACGCTGATTTTCGCCATTGCCAACGCGTGGCCTTGAAGGAGCACAAGCAATCTACCGTTTACAGCAGAGAAGTCCTGAGACTGCGCTTTGTCTACACTTTGGACCCTCCGTTTCTATACCAGCTGCCAAGCTTGGTCTGCTGGGCATGGCCTCCCATTTACGTCCCAATCTAGACATTCACAGCCCATCGTCATTCCTTACTGGCTGTATACCTTCGAAGAGGATTGCGATTGGT…
isoform_55882	ubiquitin C (UBC)	F：CCAAGATTCAGGATAAGGAAGG R：GACCCCACAGACAATAAACAGA	60	220	ATCCAAGATAAGGAGGGGATCCCCCCTGACCAGCAGCGCCTTATCTTTGCGGGCAAGCAACTTGAAGATGGCCGCACCCTTGCTGACTACAACATCCAGAAGGAATCCACCCTTCACCTTGTCCTTCGTCTTCGTGGTGGCATGCAGATTTTCGTGAAAACGCTGACTGGTAAGACCATCACTCTTGAAGTTGAAAGTTCTGATACCATTGATAATGTCAAGACCAAGATCCAGGACAAGGAGGGGATCCCCCCTGACCAGCAGCGCCTTATCTTTGCGGGCAAGCAGCTTGAGGATGGCCGCACCCTTGCTGACTACAACATCCAAAAGGAATCCACCCTTCATCTCGTCCTTCGTCTTCGTGGTGGCATGCAGATCTTCGTGAAAACGCTCACTGGT…
