# Supplementary material for: Full-length transcriptome analysis of Adiantum flabellulatum gametophyte
Source: PeerJ. 2022 Mar 9;10:e13079. doi: 10.7717/peerj.13079 (PMC8917799; doi:10.7717/peerj.13079)
Supplement: Supplemental Information 3 [file peerj-10-13079-s003.xlsx]

## Sheet: Table.S2
Table S3 29 589 pairs of SSR primers were designed and screened by Primer3 software
Isoform	SSR_seq	SSR	Start	SSR size	Product	Forward primer(5'-3')	Tm (Forward primer)	GC content (Forward primer)	Reverse primer(5'-3')	Tm (Reverse primer)	GC content (Reverse primer)	Product size
isoform_100059_11869_1	TCTCTCTCTCTCTCTCTC	TC(2*9)	230	18	CTTGGTCTCCCTGTCTCTTCT[TCTCTCTCTCTCTCTCTC]GCGACTGTCTGGCCCCTGCTCACGCCAGGGCGGGTTGCCTGGTCCCTACTCCTGCCGGCTCACTTTCTGGTACCTGCTC	CTTGGTCTCCCTGTCTCTTCTT	58.995	0.5	GAGCAGGTACCAGAAAGTGAGC	60.444	0.545455	118
isoform_100059_11869_2	TCTCTCTCTCTCTCTCTC	TC(2*9)	230	18	GCTTGGTCTCCCTGTCTCTTCT[TCTCTCTCTCTCTCTCTC]GCGACTGTCTGGCCCCTGCTCACGCCAGGGCGGGTTGCCTGGTCCCTACTCCTGCCGGCTCACTTTCTGGTACCTGCTC	GCTTGGTCTCCCTGTCTCTTCT	61.296	0.545455	GAGCAGGTACCAGAAAGTGAGC	60.444	0.545455	119
isoform_100059_11869_4	TCTCTCTCTCTCTCTCTC	TC(2*9)	230	18	GCTTGGTCTCCCTGTCTCTTCT[TCTCTCTCTCTCTCTCTC]GCGACTGTCTGGCCCCTGCTCACGCCAGGGCGGGTTGCCTGGTCCCTACTCCTGCCGGCTCACTTTCTGGTACCTGCTC	GCTTGGTCTCCCTGTCTCTTCTT	62.457	0.521739	GAGCAGGTACCAGAAAGTGAGC	60.444	0.545455	119
isoform_100059_11869_5	TCTCTCTCTCTCTCTCTC	TC(2*9)	230	18	CTTGGTCTCCCTGTCTCTTCT[TCTCTCTCTCTCTCTCTC]GCGACTGTCTGGCCCCTGCTCACGCCAGGGCGGGTTGCCTGGTCCCTACTCCTGCCGGCTCACTTTCTGGTACCTGCTCG	CTTGGTCTCCCTGTCTCTTCTT	58.995	0.5	CGAGCAGGTACCAGAAAGTGA	60.438	0.52381	119
isoform_100142_11882_1	GAGAGAGAGAGAGA	GA(2*7)	531	14	TCTATGCAGCTAAACCTGTGTGACTGAAGAAGACCGCGCGCGCGCCC[GAGAGAGAGAGAGA]GGAGAGAGAGGGGGGGGGGGCCTCCCTTTGCATCCCCCTACCATGTTGCCGCCCCCTAAAAATCTAGATCGACACGTCGA	TCTATGCAGCTAAACCTGTGTGA	59.955	0.434783	TCGACGTGTCGATCTAGATTTTT	60.143	0.391304	141
isoform_100142_11882_3	GAGAGAGAGAGAGA	GA(2*7)	531	14	TCTATGCAGCTAAACCTGTGTGACTGAAGAAGACCGCGCGCGCGCCC[GAGAGAGAGAGAGA]GGAGAGAGAGGGGGGGGGGGCCTCCCTTTGCATCCCCCTACCATGTTGCCGCCCCCTAAAAATCTAGATCGACACGTCGAG	TCTATGCAGCTAAACCTGTGTGA	59.955	0.434783	CTCGACGTGTCGATCTAGATTTT	59.797	0.434783	142
isoform_100142_11882_4	GAGAGAGAGAGAGA	GA(2*7)	531	14	CCAACAGTCTATGCAGCTAAACCTGTGTGACTGAAGAAGACCGCGCGCGCGCCC[GAGAGAGAGAGAGA]GGAGAGAGAGGGGGGGGGGGCCTCCCTTTGCATCCCCCTACCATGTTGCCGCCCCCTAAAAATCTAGATCGACACGTCGA	CCAACAGTCTATGCAGCTAAACC	60.195	0.478261	TCGACGTGTCGATCTAGATTTTT	60.143	0.391304	148
isoform_100142_11882_5	GAGAGAGAGAGAGA	GA(2*7)	531	14	CCAACAGTCTATGCAGCTAAACCTGTGTGACTGAAGAAGACCGCGCGCGCGCCC[GAGAGAGAGAGAGA]GGAGAGAGAGGGGGGGGGGGCCTCCCTTTGCATCCCCCTACCATGTTGCCGCCCCCTAAAAATCTAGATCGACACGTCGAG	CCAACAGTCTATGCAGCTAAACC	60.195	0.478261	CTCGACGTGTCGATCTAGATTTT	59.797	0.434783	149
isoform_100146_11883_1	GAGAGAGAGAGAGAGAGA	GA(2*9)	179	18	CAGAGAATGAGAGAGGGAGTGAAAGGGAGAGAC[GAGAGAGAGAGAGAGAGA]GTGAGAGTGAAAGAGACCGAGTCCCAATTTCCAAAAGCTGGTCATAG	CAGAGAATGAGAGAGGGAGTGAA	60.002	0.478261	CTATGACCAGCTTTTGGAAATTG	60.01	0.391304	98
isoform_100146_11883_2	GAGAGAGAGAGAGAGAGA	GA(2*9)	179	18	CTCGAGCTCAGAGAATGAGAGAGGGAGTGAAAGGGAGAGAC[GAGAGAGAGAGAGAGAGA]GTGAGAGTGAAAGAGACCGAGTCCCAATTTCCAAAAGCTGGTCATAG	CTCGAGCTCAGAGAATGAGAGAG	60.045	0.521739	CTATGACCAGCTTTTGGAAATTG	60.01	0.391304	106
isoform_100146_11883_5	GAGAGAGAGAGAGAGAGA	GA(2*9)	179	18	CAGAGAATGAGAGAGGGAGTGAAAGGGAGAGAC[GAGAGAGAGAGAGAGAGA]GTGAGAGTGAAAGAGACCGAGTCCCAATTTCCAAAAGCTGGTCATAGTGGCGCAATCAAGTCTTTA	CAGAGAATGAGAGAGGGAGTGAA	60.002	0.478261	TAAAGACTTGATTGCGCCACTAT	60.16	0.391304	117
isoform_100302_11887_1	GAGAGAGAGAGAGAGAGA	GA(2*9)	177	18	CCTACATCAGCCAAGAAGGTAAGTTTCTAGAGCTCTCACTGTTGAGGCTGGCGAACCTTTGAAGTGAACTCACTTTTG[GAGAGAGAGAGAGAGAGA]GGAGTCTAGCTCTACTGTACTACTGCTCTCATCTCACTTCCTTG	CCTACATCAGCCAAGAAGGTAAG	59.334	0.478261	CAAGGAAGTGAGATGAGAGCAGT	60.067	0.478261	140
isoform_100302_11887_2	GAGAGAGAGAGAGAGAGA	GA(2*9)	177	18	CATCAGCCAAGAAGGTAAGTTTCTAGAGCTCTCACTGTTGAGGCTGGCGAACCTTTGAAGTGAACTCACTTTTG[GAGAGAGAGAGAGAGAGA]GGAGTCTAGCTCTACTGTACTACTGCTCTCATCTCACTTCCTTG	CATCAGCCAAGAAGGTAAGTTTC	59.317	0.434783	CAAGGAAGTGAGATGAGAGCAGT	60.067	0.478261	136
isoform_100302_11887_3	GAGAGAGAGAGAGAGAGA	GA(2*9)	177	18	ACATCAGCCAAGAAGGTAAGTTTCTAGAGCTCTCACTGTTGAGGCTGGCGAACCTTTGAAGTGAACTCACTTTTG[GAGAGAGAGAGAGAGAGA]GGAGTCTAGCTCTACTGTACTACTGCTCTCATCTCACTTCCTTG	ACATCAGCCAAGAAGGTAAGTTTC	60.063	0.416667	CAAGGAAGTGAGATGAGAGCAGT	60.067	0.478261	137
isoform_100302_11887_4	GAGAGAGAGAGAGAGAGA	GA(2*9)	177	18	CCTACATCAGCCAAGAAGGTAAGTTTCTAGAGCTCTCACTGTTGAGGCTGGCGAACCTTTGAAGTGAACTCACTTTTG[GAGAGAGAGAGAGAGAGA]GGAGTCTAGCTCTACTGTACTACTGCTCTCATCTCACTTCCTTG	CCTACATCAGCCAAGAAGGTAAGT	60.076	0.458333	CAAGGAAGTGAGATGAGAGCAGT	60.067	0.478261	140
isoform_100302_11887_5	GAGAGAGAGAGAGAGAGA	GA(2*9)	177	18	ACATCAGCCAAGAAGGTAAGTTTCTAGAGCTCTCACTGTTGAGGCTGGCGAACCTTTGAAGTGAACTCACTTTTG[GAGAGAGAGAGAGAGAGA]GGAGTCTAGCTCTACTGTACTACTGCTCTCATCTCACTTCCTTG	ACATCAGCCAAGAAGGTAAGTTT	58.405	0.391304	CAAGGAAGTGAGATGAGAGCAGT	60.067	0.478261	137
isoform_100544_11903_4	GAAGAAGAAGAAGAA	GAA(3*5)	301	15	GTATACCGAGGGCGACAATGCCGGCGTTGAAGAC[GAAGAAGAAGAAGAA]GGGGAGGAAGAGGGGGAAGCAAGCAACGAGGAAGGGGTGGGCGAGGAGGATGAGAAGGGTCCATCTGCCATGCCTGATCTTCTCAAAGAGCAGAAGAAAGACGTG	GTATACCGAGGGCGACAATG	60.352	0.55	CACGTCTTTCTTCTGCTCTTTGA	61.064	0.434783	154
isoform_100544_11903_5	GAAGAAGAAGAAGAA	GAA(3*5)	301	15	GTATACCGAGGGCGACAATGCCGGCGTTGAAGAC[GAAGAAGAAGAAGAA]GGGGAGGAAGAGGGGGAAGCAAGCAACGAGGAAGGGGTGGGCGAGGAGGATGAGAAGGGTCCATCTGCCATGCCTGATCTTCTCAAAGAGCAGAAGAAAGACGTGA	GTATACCGAGGGCGACAATG	60.352	0.55	TCACGTCTTTCTTCTGCTCTTTG	61.064	0.434783	155
isoform_100635_11908_1	TCTCTCTCTCTCTCTCTCTCTCTCTCTC	TC(2*14)	511	28	TCCTCACCCTTTCACATTAAAAAGA[TCTCTCTCTCTCTCTCTCTCTCTCTCTC]TTCTTCTGTCTCCTCCATACGTGAGCATAATTAATCTCATCCAGGTCTTCTTCTTTACCACAACAGCTCTCTGTCTCTC	TCCTCACCCTTTCACATTAAAAA	59.865	0.347826	GAGAGACAGAGAGCTGTTGTGGT	60.111	0.521739	132
isoform_100635_11908_4	TCTCTCTCTCTCTCTCTCTCTCTCTCTC	TC(2*14)	511	28	TCCTCACCCTTTCACATTAAAAAGA[TCTCTCTCTCTCTCTCTCTCTCTCTCTC]TTCTTCTGTCTCCTCCATACGTGAGCATAATTAATCTCATCCAGGTCTTCTTCTTTACCACAACAGCTCTCTGTCTCTCT	TCCTCACCCTTTCACATTAAAAA	59.865	0.347826	AGAGAGACAGAGAGCTGTTGTGG	60.242	0.521739	133
isoform_100635_11908_5	TCTCTCTCTCTCTCTCTCTCTCTCTCTC	TC(2*14)	511	28	TCCTCACCCTTTCACATTAAAAAGA[TCTCTCTCTCTCTCTCTCTCTCTCTCTC]TTCTTCTGTCTCCTCCATACGTGAGCATAATTAATCTCATCCAGGTCTTCTTCTTTACCACAA	TCCTCACCCTTTCACATTAAAAA	59.865	0.347826	TTGTGGTAAAGAAGAAGACCTGG	59.677	0.434783	116
isoform_100969_11930_1	TGTGTGTGTGTGTGTGTGTGTG	TG(2*11)	232	22	GGCCTCCTCTACTTGTTCTGTTCTCATGGC[TGTGTGTGTGTGTGTGTGTGTG]CACTTATGAGTGCTGTCTCACGAATATTG	GGCCTCCTCTACTTGTTCTGTTC	60.649	0.521739	CAATATTCGTGAGACAGCACTCA	60.319	0.434783	81
isoform_100969_11930_2	TGTGTGTGTGTGTGTGTGTGTG	TG(2*11)	232	22	GGCCTCCTCTACTTGTTCTGTTCTCATGGC[TGTGTGTGTGTGTGTGTGTGTG]CACTTATGAGTGCTGTCTCACGAATATTGA	GGCCTCCTCTACTTGTTCTGTTC	60.649	0.521739	TCAATATTCGTGAGACAGCACTC	59.397	0.434783	82
isoform_100969_11930_3	TGTGTGTGTGTGTGTGTGTGTG	TG(2*11)	232	22	TGGCCTCCTCTACTTGTTCTGTTCTCATGGC[TGTGTGTGTGTGTGTGTGTGTG]CACTTATGAGTGCTGTCTCACGAATATTG	TGGCCTCCTCTACTTGTTCTGT	60.302	0.5	CAATATTCGTGAGACAGCACTCA	60.319	0.434783	82
isoform_100969_11930_4	TGTGTGTGTGTGTGTGTGTGTG	TG(2*11)	232	22	TGGCCTCCTCTACTTGTTCTGTTCTCATGGC[TGTGTGTGTGTGTGTGTGTGTG]CACTTATGAGTGCTGTCTCACGAATATTG	TGGCCTCCTCTACTTGTTCTGTT	61.514	0.478261	CAATATTCGTGAGACAGCACTCA	60.319	0.434783	82
isoform_100969_11930_5	TGTGTGTGTGTGTGTGTGTGTG	TG(2*11)	232	22	TTGGCCTCCTCTACTTGTTCTGTTCTCATGGC[TGTGTGTGTGTGTGTGTGTGTG]CACTTATGAGTGCTGTCTCACGAATATTG	TTGGCCTCCTCTACTTGTTCTGT	61.514	0.478261	CAATATTCGTGAGACAGCACTCA	60.319	0.434783	83
isoform_100969_11931_1	TGTGTGTGTGTG	TG(2*6)	294	12	CACTTATGAGTGCTGTCTCACGAATATTGACGGGGCGATA[TGTGTGTGTGTG]GGTGGGGCACTGCCTCAACTCTCAGATCTGGCGCGGGTATTGAGTCATGTTGGTGCGGCGGCGGCGGTAATGATGTGGGCAATTAGCAG	CACTTATGAGTGCTGTCTCACGA	60.502	0.478261	CTGCTAATTGCCCACATCATTAC	60.734	0.434783	141
isoform_100969_11931_2	TGTGTGTGTGTG	TG(2*6)	294	12	GAGTGCTGTCTCACGAATATTGACGGGGCGATA[TGTGTGTGTGTG]GGTGGGGCACTGCCTCAACTCTCAGATCTGGCGCGGGTATTGAGTCATGTTGGTGCGGCGGCGGCGGTAATGATGTGGGCAATTAGCAG	GAGTGCTGTCTCACGAATATTGA	59.397	0.434783	CTGCTAATTGCCCACATCATTAC	60.734	0.434783	134
isoform_100969_11931_3	TGTGTGTGTGTG	TG(2*6)	294	12	CACTTATGAGTGCTGTCTCACGAATATTGACGGGGCGATA[TGTGTGTGTGTG]GGTGGGGCACTGCCTCAACTCTCAGATCTGGCGCGGGTATTGAGTCATGTTGGTGCGGCGGCGGCGGTAATGATGTGGGCAATTAGCAG	CACTTATGAGTGCTGTCTCACGA	60.502	0.478261	CTGCTAATTGCCCACATCATTA	59.985	0.409091	141
isoform_101059_11937_1	TCTCTCTCTCTCTCTC	TC(2*8)	248	16	GCTAAGATCAAGCTCTGTCTATTGG[TCTCTCTCTCTCTCTC]CCCCTGTGAGGACTACAGGGTGGCCAGGGCGAGAACGCCCACAAGAGGCCCACAAGCAACAGAAGAAGGGGCAAATGGAAAAAAGGGGGGGGAATCGAAGAGGTTTGGCATG	GCTAAGATCAAGCTCTGTCTATTGG	59.957	0.44	CATGCCAAACCTCTTCGATT	60.074	0.45	153
isoform_101059_11937_2	TCTCTCTCTCTCTCTC	TC(2*8)	248	16	GCTAAGATCAAGCTCTGTCTATTGG[TCTCTCTCTCTCTCTC]CCCCTGTGAGGACTACAGGGTGGCCAGGGCGAGAACGCCCACAAGAGGCCCACAAGCAACAGAAGAAGGGG	GCTAAGATCAAGCTCTGTCTATTGG	59.957	0.44	CCCCTTCTTCTGTTGCTTGT	59.328	0.5	112
isoform_101059_11937_3	TCTCTCTCTCTCTCTC	TC(2*8)	248	16	GCTAAGATCAAGCTCTGTCTATTGG[TCTCTCTCTCTCTCTC]CCCCTGTGAGGACTACAGGGTGGCCAGGGCGAGAACGCCCACAAGAGGCCCACAAGCAACAGAAGAAGGGGCAAATGGAAAA	GCTAAGATCAAGCTCTGTCTATTGG	59.957	0.44	TTTTCCATTTGCCCCTTCTT	60.773	0.4	123
isoform_101059_11937_4	TCTCTCTCTCTCTCTC	TC(2*8)	248	16	GCTAAGATCAAGCTCTGTCTATTGG[TCTCTCTCTCTCTCTC]CCCCTGTGAGGACTACAGGGTGGCCAGGGCGAGAACGCCCACAAGAGGCCCACAAGCAACAGAAGAAGGGGCAAATGGAAAAA	GCTAAGATCAAGCTCTGTCTATTGG	59.957	0.44	TTTTTCCATTTGCCCCTTCT	60.773	0.4	124
isoform_101059_11937_5	TCTCTCTCTCTCTCTC	TC(2*8)	248	16	GCTAAGATCAAGCTCTGTCTATTGG[TCTCTCTCTCTCTCTC]CCCCTGTGAGGACTACAGGGTGGCCAGGGCGAGAACGCCCACAAGAGGCCCACAAGCAACAGAAGAAGGGGCAAAT	GCTAAGATCAAGCTCTGTCTATTGG	59.957	0.44	ATTTGCCCCTTCTTCTGTTG	59.17	0.45	117
isoform_101280_11953_1	CTCTCTCTCTCTCT	CT(2*7)	160	14	CATAAGCACCACCTCTCCCTACCCTTGCATCCTCTCTCTCCCA[CTCTCTCTCTCTCT]TGCAGAAGAGACTCTCCCGCTCTTCTCATCAACCGCCATTTCCACAGGTTGTGGTGTCCGACGATCGCTGCAGGACTCGCCCCCTCAAGGAGATTTCTTCACA	CATAAGCACCACCTCTCCCTAC	60.019	0.545455	TGTGAAGAAATCTCCTTGAGGG	60.601	0.454545	160
isoform_101280_11953_3	CTCTCTCTCTCTCT	CT(2*7)	160	14	CATAAGCACCACCTCTCCCTACCCTTGCATCCTCTCTCTCCCA[CTCTCTCTCTCTCT]TGCAGAAGAGACTCTCCCGCTCTTCTCATCAACCGCCATTTCCACAGGTTGTGGTGTC	CATAAGCACCACCTCTCCCTAC	60.019	0.545455	GACACCACAACCTGTGGAAAT	59.736	0.47619	115
isoform_101290_11954_4	TATATATATATA	TA(2*6)	476	12	CTCACCAGGGCTTTGTATATCTGTAAGATTATAAAGTATGGCCTTTGCAACAGGGTGCCTAAGACACCCACTTCTGCATGTGTGCTTCAGCCCAATCT[TATATATATATA]TGTATATATACTTTAGATCGAGAAGCCAGGT	CTCACCAGGGCTTTGTATATCTG	60.028	0.478261	ACCTGGCTTCTCGATCTAAAGTA	58.62	0.434783	141
isoform_101290_11954_5	TATATATATATA	TA(2*6)	476	12	GTATATGAGAGTGCCTCACCAGGGCTTTGTATATCTGTAAGATTATAAAGTATGGCCTTTGCAACAGGGTGCCTAAGACACCCACTTCTGCATGTGTGCTTCAGCCCAATCT[TATATATATATA]TGTATATATACTTTAGATCGAGAAGCCAGGT	GTATATGAGAGTGCCTCACCAGG	60.033	0.521739	ACCTGGCTTCTCGATCTAAAGTA	58.62	0.434783	155
isoform_101298_11955_1	TCCTCCTCCTCCTCC	TCC(3*5)	423	15	CTTACACACCTCTACATGTCCCCCCCCT[TCCTCCTCCTCCTCC]TAAAGCTAAGTACCACTCACAAGTCCCCTCTCCTCTCTCCTACTATAGCCTGGAGCGTTTT	CTTACACACCTCTACATGTCCCC	59.803	0.521739	AAAACGCTCCAGGCTATAGTAGG	60.17	0.478261	104
isoform_101298_11955_2	TCCTCCTCCTCCTCC	TCC(3*5)	423	15	CCTTACACACCTCTACATGTCCCCCCCCT[TCCTCCTCCTCCTCC]TAAAGCTAAGTACCACTCACAAGTCCCCTCTCCTCTCTCCTACTATAGCCTGGAGCGTTTT	CCTTACACACCTCTACATGTCCC	59.803	0.521739	AAAACGCTCCAGGCTATAGTAGG	60.17	0.478261	105
isoform_101298_11955_3	TCCTCCTCCTCCTCC	TCC(3*5)	423	15	CCTCCTCCTTACACACCTCTACATGTCCCCCCCCT[TCCTCCTCCTCCTCC]TAAAGCTAAGTACCACTCACAAGTCCCCTCTCCTCTCTCCTACT	CCTCCTCCTTACACACCTCTACA	59.685	0.521739	AGTAGGAGAGAGGAGAGGGGACT	60.264	0.565217	94
isoform_101298_11955_4	TCCTCCTCCTCCTCC	TCC(3*5)	423	15	CCTCCTCCTTACACACCTCTACATGTCCCCCCCCT[TCCTCCTCCTCCTCC]TAAAGCTAAGTACCACTCACAAGTCCCCTCT	CCTCCTCCTTACACACCTCTACA	59.685	0.521739	AGAGGGGACTTGTGAGTGGTACT	60.457	0.521739	81
isoform_101298_11955_5	TCCTCCTCCTCCTCC	TCC(3*5)	423	15	CCTCCTCCTTACACACCTCTACATGTCCCCCCCCT[TCCTCCTCCTCCTCC]TAAAGCTAAGTACCACTCACAAGTCCCCTCTCCTCTCTCCTAC	CCTCCTCCTTACACACCTCTACA	59.685	0.521739	GTAGGAGAGAGGAGAGGGGACTT	60.604	0.565217	93
isoform_101381_11963_1	TCCTCCTCCTCCTCC	TCC(3*5)	267	15	CTGACAAATTTCACCTCAAATCCCCTTCGTCG[TCCTCCTCCTCCTCC]TCTGCTTCTTCTGCTGCATGACTCCAAAATCCTCCTCCGGACCTCTGTGAAGAAGACATTAAAGCCTTCGATGCGTGATTTTGTTGTAAAGGT	CTGACAAATTTCACCTCAAATCC	59.864	0.391304	ACCTTTACAACAAAATCACGCAT	59.826	0.347826	140
isoform_101381_11963_2	TCCTCCTCCTCCTCC	TCC(3*5)	267	15	CTGACAAATTTCACCTCAAATCCCCTTCGTCG[TCCTCCTCCTCCTCC]TCTGCTTCTTCTGCTGCATGACTCCAAAATCCTCCTCCGGACCTCTGTGAAGAAGACATTAAAGCCTTCGATGCGTGATTTTGTTGTAAAGGTCGATCAGC	CTGACAAATTTCACCTCAAATCC	59.864	0.391304	GCTGATCGACCTTTACAACAAAA	60.514	0.391304	148
isoform_101381_11963_3	TCCTCCTCCTCCTCC	TCC(3*5)	267	15	CTGACAAATTTCACCTCAAATCCCCTTCGTCG[TCCTCCTCCTCCTCC]TCTGCTTCTTCTGCTGCATGACTCCAAAATCCTCCTCCGGACCTCTGTGAAGAAGACATTAAAGCCTTCGATGCGTGATTTTGTTGTAAAGG	CTGACAAATTTCACCTCAAATCC	59.864	0.391304	CCTTTACAACAAAATCACGCATC	60.743	0.391304	139
isoform_101381_11963_4	TCCTCCTCCTCCTCC	TCC(3*5)	267	15	CTGACAAATTTCACCTCAAATCCCCTTCGTCG[TCCTCCTCCTCCTCC]TCTGCTTCTTCTGCTGCATGACTCCAAAATCCTCCTCCGGACCTCTGTGAAGAAGACATTAAAGCCTTCGATGCGTGATTTTGTTGTAAAGGTCGATCAGCACAC	CTGACAAATTTCACCTCAAATCC	59.864	0.391304	GTGTGCTGATCGACCTTTACAAC	60.956	0.478261	152
isoform_101381_11963_5	TCCTCCTCCTCCTCC	TCC(3*5)	267	15	AAATTTCACCTCAAATCCCCTTCGTCG[TCCTCCTCCTCCTCC]TCTGCTTCTTCTGCTGCATGACTCCAAAATCCTCCTCCGGACCTCTGTGAAGAAGACATTAAAGCCTTCGATGCGTGATTTTGTTGTAAAGGT	AAATTTCACCTCAAATCCCCTT	60.056	0.363636	ACCTTTACAACAAAATCACGCAT	59.826	0.347826	135
isoform_101392_11964_1	TCTCTCTCTCTCTCTCTCTCTCTCTCTCTCTC	TC(2*16)	475	32	CCACCTACGTAAGCAAGCAGT[TCTCTCTCTCTCTCTCTCTCTCTCTCTCTCTC]TGACGCGGTCTTCCTGCAGGGTGCTGACGCGTTTCTGCCAGTTTTCCCTCCCTCGAATTCCTTTCGCGCCACTAAGCTCTGCCCGTCATCGTTCTCCTGTTCTTTGT	CCACCTACGTAAGCAAGCAGTT	60.709	0.5	ACAAAGAACAGGAGAACGATGAC	59.674	0.434783	160
isoform_101392_11964_2	TCTCTCTCTCTCTCTCTCTCTCTCTCTCTCTC	TC(2*16)	475	32	CCACCTACGTAAGCAAGCAGT[TCTCTCTCTCTCTCTCTCTCTCTCTCTCTCTC]TGACGCGGTCTTCCTGCAGGGTGCTGACGCGTTTCTGCCAGTTTTCCCTCCCTCGAATTCCTTTCGCGCCACTAAGCTCTGCCCGTCATCGTTCTCCTGTTCTTTGT	CCACCTACGTAAGCAAGCAGT	59.457	0.52381	ACAAAGAACAGGAGAACGATGAC	59.674	0.434783	160
isoform_101392_11964_3	TCTCTCTCTCTCTCTCTCTCTCTCTCTCTCTC	TC(2*16)	475	32	CCACCTACGTAAGCAAGCAGT[TCTCTCTCTCTCTCTCTCTCTCTCTCTCTCTC]TGACGCGGTCTTCCTGCAGGGTGCTGACGCGTTTCTGCCAGTTTTCCCTCCCTCGAATTCCTTTCGCGCCACTAAGCTCTGCCCGTCATCGTTCTCCTGTTCTTT	CCACCTACGTAAGCAAGCAGTT	60.709	0.5	AAAGAACAGGAGAACGATGACG	60.661	0.454545	158
isoform_101392_11964_4	TCTCTCTCTCTCTCTCTCTCTCTCTCTCTCTC	TC(2*16)	475	32	CCACCTACGTAAGCAAGCAGT[TCTCTCTCTCTCTCTCTCTCTCTCTCTCTCTC]TGACGCGGTCTTCCTGCAGGGTGCTGACGCGTTTCTGCCAGTTTTCCCTCCCTCGAATTCCTTTCGCGCCACTAAGCTCTGCCCGTCATCGTTCTCCTGTTCTTTG	CCACCTACGTAAGCAAGCAGTT	60.709	0.5	CAAAGAACAGGAGAACGATGAC	58.84	0.454545	159
isoform_101392_11964_5	TCTCTCTCTCTCTCTCTCTCTCTCTCTCTCTC	TC(2*16)	475	32	CCACCTACGTAAGCAAGCAGT[TCTCTCTCTCTCTCTCTCTCTCTCTCTCTCTC]TGACGCGGTCTTCCTGCAGGGTGCTGACGCGTTTCTGCCAGTTTTCCCTCCCTCGAATTCCTTTCGCGCCACTAAGCTCTGCCCGTCATCGTTCTCCTGTTCTTTGT	CCACCTACGTAAGCAAGCAGTT	60.709	0.5	ACAAAGAACAGGAGAACGATGA	58.84	0.409091	160
isoform_101423_11969_1	CTCTCTCTCTCTCT	CT(2*7)	235	14	TACAAGGAGCATAATGGACTGCTTTGATGGCTCCTCTGCATCGGTTCAGAGCCATGCTGAGCATTCAGAAGACGGGGCTGCTGCAAGTGGCCCGTGGGTTGGCTCTCACA[CTCTCTCTCTCTCT]TCTCACCCGTGACCCGTCCGTCCTTCCAAGAACAAG	TACAAGGAGCATAATGGACTGCT	60.163	0.434783	CTTGTTCTTGGAAGGACGGAC	61.032	0.52381	160
isoform_101423_11969_2	CTCTCTCTCTCTCT	CT(2*7)	235	14	TACAAGGAGCATAATGGACTGCTTTGATGGCTCCTCTGCATCGGTTCAGAGCCATGCTGAGCATTCAGAAGACGGGGCTGCTGCAAGTGGCCCGTGGGTTGGCTCTCACA[CTCTCTCTCTCTCT]TCTCACCCGTGACCCGTCCGTCCTTCCAAGAACAA	TACAAGGAGCATAATGGACTGCT	60.163	0.434783	TTGTTCTTGGAAGGACGGAC	60.088	0.5	159
isoform_101423_11969_3	CTCTCTCTCTCTCT	CT(2*7)	235	14	TACAAGGAGCATAATGGACTGCTTTGATGGCTCCTCTGCATCGGTTCAGAGCCATGCTGAGCATTCAGAAGACGGGGCTGCTGCAAGTGGCCCGTGGGTTGGCTCTCACA[CTCTCTCTCTCTCT]TCTCACCCGTGACCCGTCCGTCCTTCCAAGAACAAG	TACAAGGAGCATAATGGACTGCT	60.163	0.434783	CTTGTTCTTGGAAGGACGGA	60.224	0.5	160
isoform_101423_11969_4	CTCTCTCTCTCTCT	CT(2*7)	235	14	TTACAAGGAGCATAATGGACTGCTTTGATGGCTCCTCTGCATCGGTTCAGAGCCATGCTGAGCATTCAGAAGACGGGGCTGCTGCAAGTGGCCCGTGGGTTGGCTCTCACA[CTCTCTCTCTCTCT]TCTCACCCGTGACCCGTCCGTCCTTCCAAGAACAA	TTACAAGGAGCATAATGGACTGC	60.503	0.434783	TTGTTCTTGGAAGGACGGAC	60.088	0.5	160
isoform_101423_11969_5	CTCTCTCTCTCTCT	CT(2*7)	235	14	ATAATGGACTGCTTTGATGGCTCCTCTGCATCGGTTCAGAGCCATGCTGAGCATTCAGAAGACGGGGCTGCTGCAAGTGGCCCGTGGGTTGGCTCTCACA[CTCTCTCTCTCTCT]TCTCACCCGTGACCCGTCCGTCCTTCCAAGAACAAG	ATAATGGACTGCTTTGATGGCT	59.993	0.409091	CTTGTTCTTGGAAGGACGGAC	61.032	0.52381	150
isoform_101428_11970_1	AAGAAGAAGAAGAAGAAG	AAG(3*6)	203	18	AGAAGAGCTGTCAAGGCTGGCAAGAAGCCTAGCGGGCAAGAAACCCGCTGCTGAGAAGAAGCCAGCAGCTGCCAAGGAGGGTGGTGAC[AAGAAGAAGAAGAAGAAG]GCCAAAAGCACAGAAACCTACAAG	AGAAGAGCTGTCAAGGCTGG	59.745	0.55	CTTGTAGGTTTCTGTGCTTTTGG	60.201	0.434783	130
isoform_101428_11970_2	AAGAAGAAGAAGAAGAAG	AAG(3*6)	203	18	CCAGAAGAGCTGTCAAGGCTGGCAAGAAGCCTAGCGGGCAAGAAACCCGCTGCTGAGAAGAAGCCAGCAGCTGCCAAGGAGGGTGGTGAC[AAGAAGAAGAAGAAGAAG]GCCAAAAGCACAGAAACCTACAAG	CCAGAAGAGCTGTCAAGGCT	59.745	0.55	CTTGTAGGTTTCTGTGCTTTTGG	60.201	0.434783	132
isoform_101428_11970_3	AAGAAGAAGAAGAAGAAG	AAG(3*6)	203	18	AGAAGAGCTGTCAAGGCTGGCAAGAAGCCTAGCGGGCAAGAAACCCGCTGCTGAGAAGAAGCCAGCAGCTGCCAAGGAGGGTGGTGAC[AAGAAGAAGAAGAAGAAG]GCCAAAAGCACAGAAACCTACAAGATCTACATCTTCAAGGTGCTCAAGC	AGAAGAGCTGTCAAGGCTGG	59.745	0.55	GCTTGAGCACCTTGAAGATGTAG	60.438	0.478261	155
isoform_101428_11970_4	AAGAAGAAGAAGAAGAAG	AAG(3*6)	203	18	CCAGAAGAGCTGTCAAGGCTGGCAAGAAGCCTAGCGGGCAAGAAACCCGCTGCTGAGAAGAAGCCAGCAGCTGCCAAGGAGGGTGGTGAC[AAGAAGAAGAAGAAGAAG]GCCAAAAGCACAGAAACCTACAAGATCTACATCTTCAAGGTGCTCAAGC	CCAGAAGAGCTGTCAAGGCT	59.745	0.55	GCTTGAGCACCTTGAAGATGTAG	60.438	0.478261	157
isoform_101428_11970_5	AAGAAGAAGAAGAAGAAG	AAG(3*6)	203	18	CAGAAGAGCTGTCAAGGCTGGCAAGAAGCCTAGCGGGCAAGAAACCCGCTGCTGAGAAGAAGCCAGCAGCTGCCAAGGAGGGTGGTGAC[AAGAAGAAGAAGAAGAAG]GCCAAAAGCACAGAAACCTACAAG	CAGAAGAGCTGTCAAGGCTG	58.906	0.55	CTTGTAGGTTTCTGTGCTTTTGG	60.201	0.434783	131
isoform_101551_11976_1	CTCTCTCTCTCTCTCTCTCTCT	CT(2*11)	326	22	AGGTCATGCAAGGCAAGAAGAGCCCGTACGATGGGGGGCACGCAGTCTCTCCCGCCCTCTCTCTCTC[CTCTCTCTCTCTCTCTCTCTCT]TTCCAGATGTGCGCTGCCAGATGCTCGGTACAATCGATCAAGTTGAAGG	AGGTCATGCAAGGCAAGAAG	60.397	0.5	CCTTCAACTTGATCGATTGTACC	59.885	0.434783	138
isoform_101551_11976_3	CTCTCTCTCTCTCTCTCTCTCT	CT(2*11)	326	22	AGGTCATGCAAGGCAAGAAGAGCCCGTACGATGGGGGGCACGCAGTCTCTCCCGCCCTCTCTCTCTC[CTCTCTCTCTCTCTCTCTCTCT]TTCCAGATGTGCGCTGCCAGATGCTCGGTACAATCGATCAAGTTGAAGGAGTTGTCTGCCTT	AGGTCATGCAAGGCAAGAAG	60.397	0.5	AAGGCAGACAACTCCTTCAACTT	60.678	0.434783	151
isoform_101551_11976_4	CTCTCTCTCTCTCTCTCTCTCT	CT(2*11)	326	22	AGGTCATGCAAGGCAAGAAGAGCCCGTACGATGGGGGGCACGCAGTCTCTCCCGCCCTCTCTCTCTC[CTCTCTCTCTCTCTCTCTCTCT]TTCCAGATGTGCGCTGCCAGATGCTCGGTACAATCGATCAAGTTGAAGGAGTTGTCTGCCTTT	AGGTCATGCAAGGCAAGAAG	60.397	0.5	AAAGGCAGACAACTCCTTCAACT	60.678	0.434783	152
isoform_101551_11976_5	CTCTCTCTCTCTCTCTCTCTCT	CT(2*11)	326	22	AGGTCATGCAAGGCAAGAAGAGCCCGTACGATGGGGGGCACGCAGTCTCTCCCGCCCTCTCTCTCTC[CTCTCTCTCTCTCTCTCTCTCT]TTCCAGATGTGCGCTGCCAGATGCTCGGTACAATCGATCAAGTTGAAGG	AGGTCATGCAAGGCAAGAAGAG	63.03	0.5	CCTTCAACTTGATCGATTGTACC	59.885	0.434783	138
isoform_101935_12012_1	TCTCTCTCTCTCTCTCTC	TC(2*9)	264	18	GATCGACAGATCGTCAGAGAAACTTCACATTTTATGCTGCTTTGCTTCGACTGGCTCTCGCAACAAAGCGGAGGGAATGGATGGATGGATCGACGCCCTGTGTGGCCTGCTGTCGAG[TCTCTCTCTCTCTCTCTC]TGTCTGTTTGCTGGTGCTGG	GATCGACAGATCGTCAGAGAAAC	60.269	0.478261	CCAGCACCAGCAAACAGAC	60.457	0.578947	155
isoform_101935_12012_2	TCTCTCTCTCTCTCTCTC	TC(2*9)	264	18	AGATCGACAGATCGTCAGAGAAACTTCACATTTTATGCTGCTTTGCTTCGACTGGCTCTCGCAACAAAGCGGAGGGAATGGATGGATGGATCGACGCCCTGTGTGGCCTGCTGTCGAG[TCTCTCTCTCTCTCTCTC]TGTCTGTTTGCTGGTGCTGG	AGATCGACAGATCGTCAGAGAAA	60.397	0.434783	CCAGCACCAGCAAACAGAC	60.457	0.578947	156
isoform_101935_12012_3	TCTCTCTCTCTCTCTCTC	TC(2*9)	264	18	TCGACAGATCGTCAGAGAAACTTCACATTTTATGCTGCTTTGCTTCGACTGGCTCTCGCAACAAAGCGGAGGGAATGGATGGATGGATCGACGCCCTGTGTGGCCTGCTGTCGAG[TCTCTCTCTCTCTCTCTC]TGTCTGTTTGCTGGTGCTGG	TCGACAGATCGTCAGAGAAACTT	60.43	0.434783	CCAGCACCAGCAAACAGAC	60.457	0.578947	153
isoform_101935_12012_4	TCTCTCTCTCTCTCTCTC	TC(2*9)	264	18	CAGATCGTCAGAGAAACTTCACATTTTATGCTGCTTTGCTTCGACTGGCTCTCGCAACAAAGCGGAGGGAATGGATGGATGGATCGACGCCCTGTGTGGCCTGCTGTCGAG[TCTCTCTCTCTCTCTCTC]TGTCTGTTTGCTGGTGCTGG	CAGATCGTCAGAGAAACTTCACA	59.529	0.434783	CCAGCACCAGCAAACAGAC	60.457	0.578947	149
isoform_101935_12012_5	TCTCTCTCTCTCTCTCTC	TC(2*9)	264	18	ATCGACAGATCGTCAGAGAAACTTCACATTTTATGCTGCTTTGCTTCGACTGGCTCTCGCAACAAAGCGGAGGGAATGGATGGATGGATCGACGCCCTGTGTGGCCTGCTGTCGAG[TCTCTCTCTCTCTCTCTC]TGTCTGTTTGCTGGTGCTGG	ATCGACAGATCGTCAGAGAAACT	59.406	0.434783	CCAGCACCAGCAAACAGAC	60.457	0.578947	154
isoform_10197_1964_1	AGCAGCAGCAGCAGC	AGC(3*5)	1863	15	CAAGAGTTGGTGGAAAGTTTCTGAGCACGGGGGTAAAAAAAGGA[AGCAGCAGCAGCAGC]AGAATAGTGGTGCATTGATTAGTAATGAGGGTTATGACAATCTCTTTCAAGCTCTTGCTGGAAAAAAGGTAGACATAGGTGTGAAGGACG	CAAGAGTTGGTGGAAAGTTTCTG	60.184	0.434783	CGTCCTTCACACCTATGTCTACC	59.936	0.521739	149
isoform_10197_1964_2	AGCAGCAGCAGCAGC	AGC(3*5)	1863	15	CAAGAGTTGGTGGAAAGTTTCTGAGCACGGGGGTAAAAAAAGGA[AGCAGCAGCAGCAGC]AGAATAGTGGTGCATTGATTAGTAATGAGGGTTATGACAATCTCTTTCAAGCTCTTGCTGGAAAAAAGGTAGACATAGGTGTGAAGGACGG	CAAGAGTTGGTGGAAAGTTTCTG	60.184	0.434783	CCGTCCTTCACACCTATGTCTAC	59.936	0.521739	150
isoform_10197_1964_3	AGCAGCAGCAGCAGC	AGC(3*5)	1863	15	CAAGAGTTGGTGGAAAGTTTCTGAGCACGGGGGTAAAAAAAGGA[AGCAGCAGCAGCAGC]AGAATAGTGGTGCATTGATTAGTAATGAGGGTTATGACAATCTCTTTCAAGCTCTTGCTGGAAAAAAGGTAGACATAGGTGTGAAGGACGGT	CAAGAGTTGGTGGAAAGTTTCTG	60.184	0.434783	ACCGTCCTTCACACCTATGTCTA	59.936	0.478261	151
isoform_10197_1964_4	AGCAGCAGCAGCAGC	AGC(3*5)	1863	15	CAAGAGTTGGTGGAAAGTTTCTGAGCACGGGGGTAAAAAAAGGA[AGCAGCAGCAGCAGC]AGAATAGTGGTGCATTGATTAGTAATGAGGG	CAAGAGTTGGTGGAAAGTTTCTG	60.184	0.434783	CCCTCATTACTAATCAATGCACC	59.75	0.434783	90
isoform_10197_1964_5	AGCAGCAGCAGCAGC	AGC(3*5)	1863	15	CAAGAGTTGGTGGAAAGTTTCTGAGCACGGGGGTAAAAAAAGGA[AGCAGCAGCAGCAGC]AGAATAGTGGTGCATTGATTAGTAATGAGGGTTATGACAATCTCTTTCAAGCTCTTGC	CAAGAGTTGGTGGAAAGTTTCTG	60.184	0.434783	GCAAGAGCTTGAAAGAGATTGTC	59.672	0.434783	117
isoform_101972_12015_1	TCTCTCTCTCTCTCTCTCTCTCTCTC	TC(2*13)	200	26	CCTACAATCATCATCGTCTCTCCAGCTACCGTCATCTCTGTGGCGCTAGCTTTGTCTTCTCTTCATCAGAGCTGGGCGCCCGAGTAGCGGGTGACGCACA[TCTCTCTCTCTCTCTCTCTCTCTCTC]AGGATCGGCGTTGAGAGACAGAGTCTGCTA	CCTACAATCATCATCGTCTCTCC	59.976	0.478261	TAGCAGACTCTGTCTCTCAACGC	61.259	0.521739	156
isoform_101972_12015_2	TCTCTCTCTCTCTCTCTCTCTCTCTC	TC(2*13)	200	26	GCCTACAATCATCATCGTCTCTCCAGCTACCGTCATCTCTGTGGCGCTAGCTTTGTCTTCTCTTCATCAGAGCTGGGCGCCCGAGTAGCGGGTGACGCACA[TCTCTCTCTCTCTCTCTCTCTCTCTC]AGGATCGGCGTTGAGAGACAGAGTCTGCTA	GCCTACAATCATCATCGTCTCTC	60.117	0.478261	TAGCAGACTCTGTCTCTCAACGC	61.259	0.521739	157
isoform_101972_12015_5	TCTCTCTCTCTCTCTCTCTCTCTCTC	TC(2*13)	200	26	CCTACAATCATCATCGTCTCTCCAGCTACCGTCATCTCTGTGGCGCTAGCTTTGTCTTCTCTTCATCAGAGCTGGGCGCCCGAGTAGCGGGTGACGCACA[TCTCTCTCTCTCTCTCTCTCTCTCTC]AGGATCGGCGTTGAGAGACAGAGTCTGCTAC	CCTACAATCATCATCGTCTCTCC	59.976	0.478261	GTAGCAGACTCTGTCTCTCAACG	58.427	0.521739	157
isoform_102494_12054_1	CACACACACACACACACA	CA(2*9)	485	18	CCCACATACATAGGCATAACCTCAGGTGTATAGCTTCCCCTTAACACTCTCACACACACT[CACACACACACACACACA]GAGTTACAATTGGGGATTTCACATAACATGCTCCCGTTTACAAGGATCGTCAATCACGGAAGTTAATCT	CCCACATACATAGGCATAACCTC	59.643	0.478261	AGATTAACTTCCGTGATTGACGA	60.014	0.391304	147
isoform_102494_12054_2	CACACACACACACACACA	CA(2*9)	485	18	TCCCACATACATAGGCATAACCTCAGGTGTATAGCTTCCCCTTAACACTCTCACACACACT[CACACACACACACACACA]GAGTTACAATTGGGGATTTCACATAACATGCTCCCGTTTACAAGGATCGTCAATCACGGAAGTTAATCT	TCCCACATACATAGGCATAACCT	59.643	0.434783	AGATTAACTTCCGTGATTGACGA	60.014	0.391304	148
isoform_102494_12054_3	CACACACACACACACACA	CA(2*9)	485	18	GTCCCACATACATAGGCATAACCTCAGGTGTATAGCTTCCCCTTAACACTCTCACACACACT[CACACACACACACACACA]GAGTTACAATTGGGGATTTCACATAACATGCTCCCGTTTACAAGGATCGTCAATCACGGAAGTTAATCT	GTCCCACATACATAGGCATAACC	59.519	0.478261	AGATTAACTTCCGTGATTGACGA	60.014	0.391304	149
isoform_102494_12054_4	CACACACACACACACACA	CA(2*9)	485	18	CGTCCCACATACATAGGCATAACCTCAGGTGTATAGCTTCCCCTTAACACTCTCACACACACT[CACACACACACACACACA]GAGTTACAATTGGGGATTTCACATAACATGCTCCCGTTTACAAGGATCGTCAATCACGGAAGTTAATCT	CGTCCCACATACATAGGCATAAC	60.503	0.478261	AGATTAACTTCCGTGATTGACGA	60.014	0.391304	150
isoform_102524_12057_1	ATCATCATCATCATC	ATC(3*5)	492	15	TCCTCTCAACCTCGACCTTTACTACTG[ATCATCATCATCATC]ATTATCATCCCCCTCCCTCCTTCCTTAGTTTTCTTTCCCCTGTTATTTAATCATTACACCCACAAGAGTCACAA	TCCTCTCAACCTCGACCTTTACT	60.64	0.478261	TTGTGACTCTTGTGGGTGTAATG	59.944	0.434783	116
isoform_102524_12057_2	ATCATCATCATCATC	ATC(3*5)	492	15	TCCTCTCAACCTCGACCTTTACTACTG[ATCATCATCATCATC]ATTATCATCCCCCTCCCTCCTTCCTTAGTTTTCTTTCCCCTGTTATTTAATCATTACACCCACAAGAGTCACAAGGGTTTTCAA	TCCTCTCAACCTCGACCTTTACT	60.64	0.478261	TTGAAAACCCTTGTGACTCTTGT	60.061	0.391304	126
isoform_102524_12057_3	ATCATCATCATCATC	ATC(3*5)	492	15	TCCTCTCAACCTCGACCTTTACTACTG[ATCATCATCATCATC]ATTATCATCCCCCTCCCTCCTTCCTTAGTTTTCTTTCCCCTGTTATTTAATCATTACACCCACAAGAGTCACAAGGGTTTTCAAC	TCCTCTCAACCTCGACCTTTACT	60.64	0.478261	GTTGAAAACCCTTGTGACTCTTG	60.061	0.434783	127
isoform_102524_12057_4	ATCATCATCATCATC	ATC(3*5)	492	15	CTCCTCTCAACCTCGACCTTTACTACTG[ATCATCATCATCATC]ATTATCATCCCCCTCCCTCCTTCCTTAGTTTTCTTTCCCCTGTTATTTAATCATTACACCCACAAGAGTCACAAGGGTTTTCAA	CTCCTCTCAACCTCGACCTTTAC	60.64	0.521739	TTGAAAACCCTTGTGACTCTTGT	60.061	0.391304	127
isoform_102524_12057_5	ATCATCATCATCATC	ATC(3*5)	492	15	CTCCTCTCAACCTCGACCTTTACTACTG[ATCATCATCATCATC]ATTATCATCCCCCTCCCTCCTTCCTTAGTTTTCTTTCCCCTGTTATTTAATCATTACACCCACAAGAGTCACAAGGGTTTTCAAC	CTCCTCTCAACCTCGACCTTTAC	60.64	0.521739	GTTGAAAACCCTTGTGACTCTTG	60.061	0.434783	128
isoform_102606_12070_1	TCTCTCTCTCTCTC	TC(2*7)	481	14	TAGGCAGCTTATTGCTTTACTGCATGTTAGTGTGAGCCAAAATGTTATGTTTTCTATTTCATTTTCGCTGCTTGCCATGTTTCCCTTGTAATCTCCTCTCTCTCT[TCTCTCTCTCTCTC]ATTGTCCCCCATTCAATCATTAGATAA	TAGGCAGCTTATTGCTTTACTGC	60.076	0.434783	TTATCTAATGATTGAATGGGGGA	59.538	0.347826	146
isoform_102606_12070_2	TCTCTCTCTCTCTC	TC(2*7)	481	14	CCATGTTTCCCTTGTAATCTCCTCTCTCTCT[TCTCTCTCTCTCTC]ATTGTCCCCCATTCAATCATTAGATAACTGTCTGGTCATACCGACGACCTTCGGACCGTTGCTCCAATGTAACATCCGTTTCCCTCTCCATGGTGGGAGGAGACTCTTTTGTAT	CCATGTTTCCCTTGTAATCTCCT	60.576	0.434783	ATACAAAAGAGTCTCCTCCCACC	59.888	0.478261	159
isoform_102606_12070_3	TCTCTCTCTCTCTC	TC(2*7)	481	14	TTTCTATTTCATTTTCGCTGCTTGCCATGTTTCCCTTGTAATCTCCTCTCTCTCT[TCTCTCTCTCTCTC]ATTGTCCCCCATTCAATCATTAGATAACTGTCTGGTCATACCGACG	TTTCTATTTCATTTTCGCTGCTT	59.448	0.304348	CGTCGGTATGACCAGACAGTTAT	60.309	0.478261	115
isoform_102606_12070_4	TCTCTCTCTCTCTC	TC(2*7)	481	14	TTTTCTATTTCATTTTCGCTGCTTGCCATGTTTCCCTTGTAATCTCCTCTCTCTCT[TCTCTCTCTCTCTC]ATTGTCCCCCATTCAATCATTAGATAACTGTCTGGTCATACCGACG	TTTTCTATTTCATTTTCGCTGCT	59.448	0.304348	CGTCGGTATGACCAGACAGTTAT	60.309	0.478261	116
isoform_102606_12070_5	TCTCTCTCTCTCTC	TC(2*7)	481	14	CCATGTTTCCCTTGTAATCTCCTCTCTCTCT[TCTCTCTCTCTCTC]ATTGTCCCCCATTCAATCATTAGATAACTGTCTGGTCATACCGACG	CCATGTTTCCCTTGTAATCTCCT	60.576	0.434783	CGTCGGTATGACCAGACAGTTAT	60.309	0.478261	91
isoform_102659_12080_1	GGCGGCGGCGGCGGC	GGC(3*5)	371	15	ATCTTGCTACAACTGTGGAGAGGCTGGTCATCTTGCTCGCGATTGTCCTGATGGTAGCAGCAGGCGAGGTGGCGGTGGTGGTGGAGGTGGT[GGCGGCGGCGGCGGC]GGTAGCCGCGGCTGCTACAACTGTGGCGAGCAAGGACATCTTGCACGGGATTG	ATCTTGCTACAACTGTGGAGAGG	59.824	0.478261	CAATCCCGTGCAAGATGTC	60.064	0.526316	159
isoform_102659_12080_4	GGCGGCGGCGGCGGC	GGC(3*5)	371	15	ATCTTGCTACAACTGTGGAGAGGCTGGTCATCTTGCTCGCGATTGTCCTGATGGTAGCAGCAGGCGAGGTGGCGGTGGTGGTGGAGGTGGT[GGCGGCGGCGGCGGC]GGTAGCCGCGGCTGCTACAACTGTGGCGAGCAAGGACATCTTGCACGGGAT	ATCTTGCTACAACTGTGGAGAGG	59.824	0.478261	ATCCCGTGCAAGATGTCCT	60.491	0.526316	157
isoform_102757_12086_1	CTCTCTCTCTCTCTCTCTCTCTCTCT	CT(2*13)	200	26	CATCCATGGCTCTTCACAGTAGCCACAGGGCAAATGGCCCTAGCG[CTCTCTCTCTCTCTCTCTCTCTCTCT]CATCCCGCAAGTTTTAGGATTCACTGTTTTCTGCAGAC	CATCCATGGCTCTTCACAGTAG	59.757	0.5	GTCTGCAGAAAACAGTGAATCCT	59.809	0.434783	109
isoform_102757_12086_4	CTCTCTCTCTCTCTCTCTCTCTCTCT	CT(2*13)	200	26	TCATCCATGGCTCTTCACAGTAGCCACAGGGCAAATGGCCCTAGCG[CTCTCTCTCTCTCTCTCTCTCTCTCT]CATCCCGCAAGTTTTAGGATTCACTGTTTTCTGCAGAC	TCATCCATGGCTCTTCACAGTAG	61.559	0.478261	GTCTGCAGAAAACAGTGAATCCT	59.809	0.434783	110
isoform_102757_12086_5	CTCTCTCTCTCTCTCTCTCTCTCTCT	CT(2*13)	200	26	CTCATCCATGGCTCTTCACAGTAGCCACAGGGCAAATGGCCCTAGCG[CTCTCTCTCTCTCTCTCTCTCTCTCT]CATCCCGCAAGTTTTAGGATTCACTGTTTTCTGCAGAC	CTCATCCATGGCTCTTCACAGTA	61.559	0.478261	GTCTGCAGAAAACAGTGAATCCT	59.809	0.434783	111
isoform_102777_12088_1	AGAGAGAGAGAGAGAGAGAG	AG(2*10)	160	20	TTAGACGCACCTACAGAGACACATAGAGAGCTCATCACCCCCACACTTCCACAACCTTCCTCTGCACGCTCTAGGTACTAGCTTGCAC[AGAGAGAGAGAGAGAGAGAG]TGTGTGAGTGAGTGAGAGTGCTTATCAGTCG	TTAGACGCACCTACAGAGACACA	59.988	0.478261	CGACTGATAAGCACTCTCACTCA	59.694	0.478261	139
isoform_102777_12088_2	AGAGAGAGAGAGAGAGAGAG	AG(2*10)	160	20	TTAGACGCACCTACAGAGACACATAGAGAGCTCATCACCCCCACACTTCCACAACCTTCCTCTGCACGCTCTAGGTACTAGCTTGCAC[AGAGAGAGAGAGAGAGAGAG]TGTGTGAGTGAGTGAGAGTGCTTATCAGTCGCCTCCTTTTGTT	TTAGACGCACCTACAGAGACACA	59.988	0.478261	AACAAAAGGAGGCGACTGATAA	60.129	0.409091	151
isoform_102777_12088_3	AGAGAGAGAGAGAGAGAGAG	AG(2*10)	160	20	CTGCACGCTCTAGGTACTAGCTTGCAC[AGAGAGAGAGAGAGAGAGAG]TGTGTGAGTGAGTGAGAGTGCTTATCAGTCGCCTCCTTTTGTTCATCGCTGCCCAGGCCTTGACTCTCCTCGCATCGTATAC	CTGCACGCTCTAGGTACTAGCTT	59.441	0.521739	GTATACGATGCGAGGAGAGTCAA	60.646	0.478261	129
isoform_102777_12088_4	AGAGAGAGAGAGAGAGAGAG	AG(2*10)	160	20	CGCACCTACAGAGACACATAGAGAGCTCATCACCCCCACACTTCCACAACCTTCCTCTGCACGCTCTAGGTACTAGCTTGCAC[AGAGAGAGAGAGAGAGAGAG]TGTGTGAGTGAGTGAGAGTGCTTATCAGTCG	CGCACCTACAGAGACACATAGAG	59.087	0.521739	CGACTGATAAGCACTCTCACTCA	59.694	0.478261	134
isoform_102777_12088_5	AGAGAGAGAGAGAGAGAGAG	AG(2*10)	160	20	GACACATAGAGAGCTCATCACCCCCACACTTCCACAACCTTCCTCTGCACGCTCTAGGTACTAGCTTGCAC[AGAGAGAGAGAGAGAGAGAG]TGTGTGAGTGAGTGAGAGTGCTTATCAGTCGCCTCCTTTTGTT	GACACATAGAGAGCTCATCACCC	60.154	0.521739	AACAAAAGGAGGCGACTGATAA	60.129	0.409091	134
isoform_103018_12097_2	GAGAGAGAGAGAGAGAGAGAGAGAGAGAGAGAGAGAGAGAGAGAGA	GA(2*23)	209	46	ACTGTCAGCAGATTTGGAGTAGCACAGGAGAG[GAGAGAGAGAGAGAGAGAGAGAGAGAGAGAGAGAGAGAGAGAGAGA]CCCTTCCCTCTCGACATTCCTG	ACTGTCAGCAGATTTGGAGTAGC	59.963	0.478261	CAGGAATGTCGAGAGGGAAG	59.797	0.55	100
isoform_103018_12097_4	GAGAGAGAGAGAGAGAGAGAGAGAGAGAGAGAGAGAGAGAGAGAGA	GA(2*23)	209	46	ACTGTCAGCAGATTTGGAGTAGCACAGGAGAG[GAGAGAGAGAGAGAGAGAGAGAGAGAGAGAGAGAGAGAGAGAGAGA]CCCTTCCCTCTCGACATTCCT	ACTGTCAGCAGATTTGGAGTAGC	59.963	0.478261	AGGAATGTCGAGAGGGAAGG	60.586	0.55	99
isoform_103018_12097_5	GAGAGAGAGAGAGAGAGAGAGAGAGAGAGAGAGAGAGAGAGAGAGA	GA(2*23)	209	46	ACTGTCAGCAGATTTGGAGTAGCACAGGAGAG[GAGAGAGAGAGAGAGAGAGAGAGAGAGAGAGAGAGAGAGAGAGAGA]CCCTTCCCTCTCGACATTCCTGGTCGGCATTGCCATCGTGACGGGTCGGCTACAAAGCGCGCGCAACGAGGCGTTTGATAAC	ACTGTCAGCAGATTTGGAGTAGC	59.963	0.478261	GTTATCAAACGCCTCGTTGC	60.647	0.5	160
isoform_103018_12098_3	GAGAGAGAGAGA	GA(2*6)	496	12	GTACAGGCTGCAGCACACAGAAGACGCGCAGATGTGT[GAGAGAGAGAGA]GGGAGAGGCCCTTTCTCATAACTGGCCTCGAACCCCCCACCCCCGTTTTCCCACTTCTGAATATGATTAATATTCTCCTTAACAAAGAGCAATTTCCA	GTACAGGCTGCAGCACACAG	60.684	0.6	TGGAAATTGCTCTTTGTTAAGGA	60.115	0.347826	147
isoform_103018_12098_5	GAGAGAGAGAGA	GA(2*6)	496	12	GTACAGGCTGCAGCACACAGAAGACGCGCAGATGTGT[GAGAGAGAGAGA]GGGAGAGGCCCTTTCTCATAACTGGCCTCGAACCCCCCACCCCCGTTTTCCCACTTCTGAATATGA	GTACAGGCTGCAGCACACAG	60.684	0.6	TCATATTCAGAAGTGGGAAAACG	60.35	0.391304	115
isoform_10310_1988_1	GAGAGAGAGAGA	GA(2*6)	154	12	TAAGATAGTGTTGTGCATCTGCGACTGCCACG[GAGAGAGAGAGA]TGGGAGTTCATGTTCTCTTGGTGCCATGGTCTGCACAAGGCCATCTAACTCCAGTGCTGCAACTGGCGCAGGTGCTGGCGTGCAAGCCAGGTTTCCTTATAACCT	TAAGATAGTGTTGTGCATCTGCG	60.332	0.434783	AGGTTATAAGGAAACCTGGCTTG	59.913	0.434783	149
isoform_10310_1988_2	GAGAGAGAGAGA	GA(2*6)	154	12	TAAGATAGTGTTGTGCATCTGCGACTGCCACG[GAGAGAGAGAGA]TGGGAGTTCATGTTCTCTTGGTGCCATGGTCTGCACAAGGCCATCTAACTCCAGTGCTGCAACT	TAAGATAGTGTTGTGCATCTGCG	60.332	0.434783	AGTTGCAGCACTGGAGTTAGATG	60.855	0.478261	108
isoform_10310_1988_3	GAGAGAGAGAGA	GA(2*6)	154	12	TAAGATAGTGTTGTGCATCTGCGACTGCCACG[GAGAGAGAGAGA]TGGGAGTTCATGTTCTCTTGGTGCCATGGTCTGCACAAGGCCATCTAACTCCAGTGCTGCAACTG	TAAGATAGTGTTGTGCATCTGCG	60.332	0.434783	CAGTTGCAGCACTGGAGTTAGAT	60.855	0.478261	109
isoform_10310_1988_4	GAGAGAGAGAGA	GA(2*6)	154	12	ATAGTGTTGTGCATCTGCGACTGCCACG[GAGAGAGAGAGA]TGGGAGTTCATGTTCTCTTGGTGCCATGGTCTGCACAAGGCCATCTAACTCCAGTGCTGCAACTGGCGCAGGTGCTGGCGTGCAAGCCAGGTTTCCTTATAACCT	ATAGTGTTGTGCATCTGCGACT	59.832	0.454545	AGGTTATAAGGAAACCTGGCTTG	59.913	0.434783	145
isoform_10310_1988_5	GAGAGAGAGAGA	GA(2*6)	154	12	TAAGATAGTGTTGTGCATCTGCGACTGCCACG[GAGAGAGAGAGA]TGGGAGTTCATGTTCTCTTGGTGCCATGGTCTGCACAAGGCCATCTAACTCCAGTGCTGCAAC	TAAGATAGTGTTGTGCATCTGCG	60.332	0.434783	GTTGCAGCACTGGAGTTAGATG	59.943	0.5	107
isoform_103330_12115_1	CTCCTCCTCCTCCTCCTCCTC	CTC(3*7)	194	21	TTGATAGGCAACATAAGAGCCATGTGAACGACTCCTCCTG[CTCCTCCTCCTCCTCCTCCTC]TTCCTCTTCAAGCATGGAACCTATTAGTAAAGCCAGCATGGAGCATTCAGAACTTGGGAAGTGGAAGAAAG	TTGATAGGCAACATAAGAGCCAT	60.003	0.391304	CTTTCTTCCACTTCCCAAGTTCT	60.148	0.434783	132
isoform_103330_12115_2	CTCCTCCTCCTCCTCCTCCTC	CTC(3*7)	194	21	ATTGATAGGCAACATAAGAGCCATGTGAACGACTCCTCCTG[CTCCTCCTCCTCCTCCTCCTC]TTCCTCTTCAAGCATGGAACCTATTAGTAAAGCCAGCATGGAGCATTCAGAACTTGGGAAGTGGAAGAAAG	ATTGATAGGCAACATAAGAGCCA	60.003	0.391304	CTTTCTTCCACTTCCCAAGTTCT	60.148	0.434783	133
isoform_103330_12115_3	CTCCTCCTCCTCCTCCTCCTC	CTC(3*7)	194	21	CATTGATAGGCAACATAAGAGCCATGTGAACGACTCCTCCTG[CTCCTCCTCCTCCTCCTCCTC]TTCCTCTTCAAGCATGGAACCTATTAGTAAAGCCAGCATGGAGCATTCAGAACTTGGGAAGTGGAAGAAAG	CATTGATAGGCAACATAAGAGCC	60.003	0.434783	CTTTCTTCCACTTCCCAAGTTCT	60.148	0.434783	134
isoform_103330_12115_4	CTCCTCCTCCTCCTCCTCCTC	CTC(3*7)	194	21	ACATAAGAGCCATGTGAACGACTCCTCCTG[CTCCTCCTCCTCCTCCTCCTC]TTCCTCTTCAAGCATGGAACCTATTAGTAAAGCCAGCATGGAGCATTCAGAACTTGGGAAGTGGAAGAAAG	ACATAAGAGCCATGTGAACGACT	60.075	0.434783	CTTTCTTCCACTTCCCAAGTTCT	60.148	0.434783	122
isoform_103330_12115_5	CTCCTCCTCCTCCTCCTCCTC	CTC(3*7)	194	21	GCATTGATAGGCAACATAAGAGCCATGTGAACGACTCCTCCTG[CTCCTCCTCCTCCTCCTCCTC]TTCCTCTTCAAGCATGGAACCTATTAGTAAAGCCAGCATGGAGCATTCAGAACTTGGGAAGTGGAAGAAAG	GCATTGATAGGCAACATAAGAGC	60.135	0.434783	CTTTCTTCCACTTCCCAAGTTCT	60.148	0.434783	135
isoform_103428_12122_1	GTGTGTGTGTGT	GT(2*6)	505	12	ATAGTGCCAGCAAGAAAATGTGTGTGTAG[GTGTGTGTGTGT]GCGCGTGCACGCGTGTGCAGCAAGTTGTCTTGATGTGCACATGCACGTGTGCAGCAACTTTTCTTGATGTGGCTAC	ATAGTGCCAGCAAGAAAATGTGT	60.075	0.391304	GTAGCCACATCAAGAAAAGTTGC	60.183	0.434783	117
isoform_103428_12122_2	GTGTGTGTGTGT	GT(2*6)	505	12	GGAAGTTTATAGTGCCAGCAAGAAAATGTGTGTGTAG[GTGTGTGTGTGT]GCGCGTGCACGCGTGTGCAGCAAGTTGTCTTGATGTGCACATGCACGTGTGCAGCAACTTTTCTTGATGTGGCTAC	GGAAGTTTATAGTGCCAGCAAGA	59.806	0.434783	GTAGCCACATCAAGAAAAGTTGC	60.183	0.434783	125
isoform_10363_2000_1	CTCTCTCTCTCTCTCTCTCTCTCT	CT(2*12)	152	24	TCTCATAATAACACCTCTCTCGCG[CTCTCTCTCTCTCTCTCTCTCTCT]TGTGTGCATTCTACATATATATCCCGATCCCACCCCCCCCCCCCCCAAATCCATCCCCCCCCCAAACACCAAAACCCCAAAAAAAACACACGAAATACCAAAACACA	TCTCATAATAACACCTCTCTCGC	57.673	0.434783	TGTGTTTTGGTATTTCGTGTGTT	59.344	0.347826	155
isoform_10363_2000_2	CTCTCTCTCTCTCTCTCTCTCTCT	CT(2*12)	152	24	CTCTCATAATAACACCTCTCTCGCG[CTCTCTCTCTCTCTCTCTCTCTCT]TGTGTGCATTCTACATATATATCCCGATCCCACCCCCCCCCCCCCCAAATCCATCCCCCCCCCAAACACCAAAACCCCAAAAAAAACACACGAAATACCAAAACACA	CTCTCATAATAACACCTCTCTCGC	58.633	0.458333	TGTGTTTTGGTATTTCGTGTGTT	59.344	0.347826	156
isoform_10363_2000_3	CTCTCTCTCTCTCTCTCTCTCTCT	CT(2*12)	152	24	TCTCATAATAACACCTCTCTCGCG[CTCTCTCTCTCTCTCTCTCTCTCT]TGTGTGCATTCTACATATATATCCCGATCCCACCCCCCCCCCCCCCAAATCCATCCCCCCCCCAAACACCAAAACCCCAAAAAAAACACACGAAATACCAAAACACACA	TCTCATAATAACACCTCTCTCGC	57.673	0.434783	TGTGTGTTTTGGTATTTCGTGTG	60.724	0.391304	157
isoform_10363_2000_5	CTCTCTCTCTCTCTCTCTCTCTCT	CT(2*12)	152	24	CTCTCATAATAACACCTCTCTCGCG[CTCTCTCTCTCTCTCTCTCTCTCT]TGTGTGCATTCTACATATATATCCCGATCCCACCCCCCCCCCCCCCAAATCCATCCCCCCCCCAAACACCAAAACCCCAAAAAAAACACACGAAATACCAAAACACACA	CTCTCATAATAACACCTCTCTCGC	58.633	0.458333	TGTGTGTTTTGGTATTTCGTGTG	60.724	0.391304	158
isoform_10363_2003_1	ACACACACACAC	AC(2*6)	314	12	CACACAATTAAAGGACACACAGGAAAAAA[ACACACACACAC]TAACACACACACTTCCCTTCCCCTCTCAGGCTCTCACTGCTTTCCAATCCTTGCCCATTCTTTCCCTCTTGCTATGGTTTTT	CACACAATTAAAGGACACACAGG	59.452	0.434783	AAAAACCATAGCAAGAGGGAAAG	60.014	0.391304	123
isoform_10363_2003_2	ACACACACACAC	AC(2*6)	314	12	CACACAATTAAAGGACACACAGGAAAAAA[ACACACACACAC]TAACACACACACTTCCCTTCCCCTCTCAGGCTCTCACTGCTTTCCAATCCTTGCCCATTCTTTCCCTCTTGCTATGGTTTTTCTCCGATAGTAGCC	CACACAATTAAAGGACACACAGG	59.452	0.434783	GGCTACTATCGGAGAAAAACCAT	59.886	0.434783	137
isoform_10371_2005_1	AGAGAGAGAGAGAGAGAGAGAGAGAGAGAGAGAGAGAGAGAGAGAGAGAGAGAGAGAGAGAGAGAGAGAGAGAGAGAG	AG(2*39)	204	78	GCCACCTTTCTACTCACACAGATACCTTC[AGAGAGAGAGAGAGAGAGAGAGAGAGAGAGAGAGAGAGAGAGAGAGAGAGAGAGAGAGAGAGAGAGAGAGAGAGAGAG]ATGGGCTGTCTTGCTTCCAAGGGTACAAACACCATCTCAT	GCCACCTTTCTACTCACACAGAT	59.696	0.478261	ATGAGATGGTGTTTGTACCCTTG	60.158	0.434783	147
isoform_10371_2005_2	AGAGAGAGAGAGAGAGAGAGAGAGAGAGAGAGAGAGAGAGAGAGAGAGAGAGAGAGAGAGAGAGAGAGAGAGAGAGAG	AG(2*39)	204	78	TATGCCACCTTTCTACTCACACAGATACCTTC[AGAGAGAGAGAGAGAGAGAGAGAGAGAGAGAGAGAGAGAGAGAGAGAGAGAGAGAGAGAGAGAGAGAGAGAGAGAGAG]ATGGGCTGTCTTGCTTCCAAGGGTACAAACACCATCTCAT	TATGCCACCTTTCTACTCACACA	59.685	0.434783	ATGAGATGGTGTTTGTACCCTTG	60.158	0.434783	150
isoform_10371_2005_3	AGAGAGAGAGAGAGAGAGAGAGAGAGAGAGAGAGAGAGAGAGAGAGAGAGAGAGAGAGAGAGAGAGAGAGAGAGAGAG	AG(2*39)	204	78	ATGCCACCTTTCTACTCACACAGATACCTTC[AGAGAGAGAGAGAGAGAGAGAGAGAGAGAGAGAGAGAGAGAGAGAGAGAGAGAGAGAGAGAGAGAGAGAGAGAGAGAG]ATGGGCTGTCTTGCTTCCAAGGGTACAAACACCATCTCAT	ATGCCACCTTTCTACTCACACAG	60.594	0.478261	ATGAGATGGTGTTTGTACCCTTG	60.158	0.434783	149
isoform_10371_2005_5	AGAGAGAGAGAGAGAGAGAGAGAGAGAGAGAGAGAGAGAGAGAGAGAGAGAGAGAGAGAGAGAGAGAGAGAGAGAGAG	AG(2*39)	204	78	GCCACCTTTCTACTCACACAGATACCTTC[AGAGAGAGAGAGAGAGAGAGAGAGAGAGAGAGAGAGAGAGAGAGAGAGAGAGAGAGAGAGAGAGAGAGAGAGAGAGAG]ATGGGCTGTCTTGCTTCCAAGGGTACAAACACCATCTCATC	GCCACCTTTCTACTCACACAGAT	59.696	0.478261	GATGAGATGGTGTTTGTACCCTT	59.272	0.434783	148
isoform_103768_12142_1	AGAGAGAGAGAGAGAGAG	AG(2*9)	181	18	CGTCCCATGATGTTGTCATAGTACACAATGTGGGAAATTTATCT[AGAGAGAGAGAGAGAGAG]TGTGTATGTATCCTTTCAAGAGAGAACTGTTTTGAGGGTATTCATGACGCTTAT	CGTCCCATGATGTTGTCATAGTA	59.761	0.434783	ATAAGCGTCATGAATACCCTCAA	59.877	0.391304	116
isoform_103768_12142_2	AGAGAGAGAGAGAGAGAG	AG(2*9)	181	18	CGTCCCATGATGTTGTCATAGTACACAATGTGGGAAATTTATCT[AGAGAGAGAGAGAGAGAG]TGTGTATGTATCCTTTCAAGAGAGAACTGTTTTGAGGGTATTCATGACGCTTA	CGTCCCATGATGTTGTCATAGTA	59.761	0.434783	TAAGCGTCATGAATACCCTCAAA	60.83	0.391304	115
isoform_103768_12142_3	AGAGAGAGAGAGAGAGAG	AG(2*9)	181	18	GTGTCATTTATAGATCGAGGCGTCCCATGATGTTGTCATAGTACACAATGTGGGAAATTTATCT[AGAGAGAGAGAGAGAGAG]TGTGTATGTATCCTTTCAAGAGAGAACTGTTTTGAGGGTATTCATGACG	GTGTCATTTATAGATCGAGGCGT	59.541	0.434783	CGTCATGAATACCCTCAAAACAG	60.755	0.434783	131
isoform_103768_12142_4	AGAGAGAGAGAGAGAGAG	AG(2*9)	181	18	GTCATTTATAGATCGAGGCGTCCCATGATGTTGTCATAGTACACAATGTGGGAAATTTATCT[AGAGAGAGAGAGAGAGAG]TGTGTATGTATCCTTTCAAGAGAGAACTGTTTTGAGGGTATTCATGACGCTTAT	GTCATTTATAGATCGAGGCGTCC	61.15	0.478261	ATAAGCGTCATGAATACCCTCAA	59.877	0.391304	134
isoform_103768_12142_5	AGAGAGAGAGAGAGAGAG	AG(2*9)	181	18	GTGTCATTTATAGATCGAGGCGTCCCATGATGTTGTCATAGTACACAATGTGGGAAATTTATCT[AGAGAGAGAGAGAGAGAG]TGTGTATGTATCCTTTCAAGAGAGAACTGTTTTGAGGGTATTCATGACGCTTA	GTGTCATTTATAGATCGAGGCGT	59.541	0.434783	TAAGCGTCATGAATACCCTCAAA	60.83	0.391304	135
isoform_10399_2013_4	AGAGAGAGAGAGAGAGAGAGAGAGAGAGAGAGAGAGAGAG	AG(2*20)	155	40	TCTTCGACGACTTCACATTCTCTGCGGGGTAGATTCGGGTTCCTTGCACGCGCTGAGAGAGAGAGGCATCCTGGGTCTCGTGCTCATATTCCAC[AGAGAGAGAGAGAGAGAGAGAGAGAGAGAGAGAGAGAGAG]TCTGCTGTATTCCCAGAGAATTTCGG	TCTTCGACGACTTCACATTCTCT	60.43	0.434783	CCGAAATTCTCTGGGAATACAG	59.96	0.454545	160
isoform_10408_2016_4	GAGAGAGAGAGAGAGAGAGAGAGAGAGAGAGAGAGAGAGAGA	GA(2*21)	196	42	CCATCCACACCTTCTGTGTAAGTGCTTCGTGTT[GAGAGAGAGAGAGAGAGAGAGAGAGAGAGAGAGAGAGAGAGA]GTTGCTTTTTCCTGTTAAAGCAATTTGTTCAGC	CCATCCACACCTTCTGTGTAAGT	60.329	0.478261	GCTGAACAAATTGCTTTAACAGG	60.173	0.391304	108
isoform_10408_2016_5	GAGAGAGAGAGAGAGAGAGAGAGAGAGAGAGAGAGAGAGAGA	GA(2*21)	196	42	ATCCACACCTTCTGTGTAAGTGCTTCGTGTT[GAGAGAGAGAGAGAGAGAGAGAGAGAGAGAGAGAGAGAGAGA]GTTGCTTTTTCCTGTTAAAGCAATTTGTTCAGCTTTAAACTGGCTTTC	ATCCACACCTTCTGTGTAAGTGC	60.47	0.478261	GAAAGCCAGTTTAAAGCTGAACA	59.946	0.391304	121
isoform_104148_12171_1	CTCTCTCTCTCT	CT(2*6)	151	12	ATGTGTTGATGGACAATTGATGAGGGTCTGCGACTGGCGACAGGCGGGGAGGGAGGGGAGGCGATGGCTGCCTGTCTCTCTTTCTCTCTCTCCCCCC[CTCTCTCTCTCT]ATCCGCCCGTGCGTTCATGGTTGCTCCGGAT	ATGTGTTGATGGACAATTGATGA	60.111	0.347826	ATCCGGAGCAACCATGAAC	60.887	0.526316	140
isoform_104148_12171_2	CTCTCTCTCTCT	CT(2*6)	151	12	GATGTGTTGATGGACAATTGATGAGGGTCTGCGACTGGCGACAGGCGGGGAGGGAGGGGAGGCGATGGCTGCCTGTCTCTCTTTCTCTCTCTCCCCCC[CTCTCTCTCTCT]ATCCGCCCGTGCGTTCATGGTTGCTCCGGAT	GATGTGTTGATGGACAATTGATG	60.111	0.391304	ATCCGGAGCAACCATGAAC	60.887	0.526316	141
isoform_104148_12171_3	CTCTCTCTCTCT	CT(2*6)	151	12	ATGTGTTGATGGACAATTGATGAGGGTCTGCGACTGGCGACAGGCGGGGAGGGAGGGGAGGCGATGGCTGCCTGTCTCTCTTTCTCTCTCTCCCCCC[CTCTCTCTCTCT]ATCCGCCCGTGCGTTCATGGTTGCTCCGGAT	ATGTGTTGATGGACAATTGATGA	60.111	0.347826	ATCCGGAGCAACCATGAA	60.006	0.5	140
isoform_104276_12181_1	CTCTCTCTCTCTCTCTCTCTCTCT	CT(2*12)	174	24	GCTCTCTTTCTCTCTTCGCTCTGCGTCTCGGTCCTGCCATGGCGAAGCGGAGGGGGGAAGAGGGGGAGAGGGCTTTCCATGGC[CTCTCTCTCTCTCTCTCTCTCTCT]GCCTGCTTCCTGCCCTGCAAAGAAGGAGATGCG	GCTCTCTTTCTCTCTTCGCTCTG	61.402	0.521739	CGCATCTCCTTCTTTGCAG	59.682	0.526316	140
isoform_104276_12181_2	CTCTCTCTCTCTCTCTCTCTCTCT	CT(2*12)	174	24	CTCTCTTTCTCTCTTCGCTCTGCGTCTCGGTCCTGCCATGGCGAAGCGGAGGGGGGAAGAGGGGGAGAGGGCTTTCCATGGC[CTCTCTCTCTCTCTCTCTCTCTCT]GCCTGCTTCCTGCCCTGCAAAGAAGGAGATGCGGCAC	CTCTCTTTCTCTCTTCGCTCTGC	61.402	0.521739	GTGCCGCATCTCCTTCTTT	60.355	0.526316	143
isoform_104276_12181_3	CTCTCTCTCTCTCTCTCTCTCTCT	CT(2*12)	174	24	GCTCTCTTTCTCTCTTCGCTCTGCGTCTCGGTCCTGCCATGGCGAAGCGGAGGGGGGAAGAGGGGGAGAGGGCTTTCCATGGC[CTCTCTCTCTCTCTCTCTCTCTCT]GCCTGCTTCCTGCCCTGCAAAGAAGGAGATGCGGCAC	GCTCTCTTTCTCTCTTCGCTCTG	61.402	0.521739	GTGCCGCATCTCCTTCTTT	60.355	0.526316	144
isoform_104276_12181_5	CTCTCTCTCTCTCTCTCTCTCTCT	CT(2*12)	174	24	TCTCTTTCTCTCTTCGCTCTGCGTCTCGGTCCTGCCATGGCGAAGCGGAGGGGGGAAGAGGGGGAGAGGGCTTTCCATGGC[CTCTCTCTCTCTCTCTCTCTCTCT]GCCTGCTTCCTGCCCTGCAAAGAAGGAGATGCGGCAC	TCTCTTTCTCTCTTCGCTCTGC	60.537	0.5	GTGCCGCATCTCCTTCTTT	60.355	0.526316	142
isoform_10448_2029_1	TCTCTCTCTCTCTCTCTCTCTCTCTC	TC(2*13)	366	26	CTCTCTTTAAGATGCCAAGTTGCCTCGGGCCACTCGCTCTCTGTG[TCTCTCTCTCTCTCTCTCTCTCTCTC]CCCCCCTACGTAGTACCTACGTACAACTTCTTTGAATACGAGTAGCTAAAAGCAAACAACGG	CTCTCTTTAAGATGCCAAGTTGC	59.573	0.434783	CCGTTGTTTGCTTTTAGCTACTC	59.523	0.434783	133
isoform_10448_2029_2	TCTCTCTCTCTCTCTCTCTCTCTCTC	TC(2*13)	366	26	CCTCCTCTCTTTAAGATGCCAAGTTGCCTCGGGCCACTCGCTCTCTGTG[TCTCTCTCTCTCTCTCTCTCTCTCTC]CCCCCCTACGTAGTACCTACGTACAACTTCTTTGAATACGAGTAGCTAAAAGCAAACAACG	CCTCCTCTCTTTAAGATGCCAAG	60.708	0.478261	CGTTGTTTGCTTTTAGCTACTCG	60.457	0.434783	136
isoform_10448_2029_3	TCTCTCTCTCTCTCTCTCTCTCTCTC	TC(2*13)	366	26	CCTCCTCTCTTTAAGATGCCAAGTTGCCTCGGGCCACTCGCTCTCTGTG[TCTCTCTCTCTCTCTCTCTCTCTCTC]CCCCCCTACGTAGTACCTACGTACAACTTCTTTGAATACGAGTAGCTAAAAGCAAACAACGG	CCTCCTCTCTTTAAGATGCCAAG	60.708	0.478261	CCGTTGTTTGCTTTTAGCTACTC	59.523	0.434783	137
isoform_10448_2029_4	TCTCTCTCTCTCTCTCTCTCTCTCTC	TC(2*13)	366	26	CTCTTTAAGATGCCAAGTTGCCTCGGGCCACTCGCTCTCTGTG[TCTCTCTCTCTCTCTCTCTCTCTCTC]CCCCCCTACGTAGTACCTACGTACAACTTCTTTGAATACGAGTAGCTAAAAGCAAACAACG	CTCTTTAAGATGCCAAGTTGCCT	61.086	0.434783	CGTTGTTTGCTTTTAGCTACTCG	60.457	0.434783	130
isoform_10448_2029_5	TCTCTCTCTCTCTCTCTCTCTCTCTC	TC(2*13)	366	26	CTCTTTAAGATGCCAAGTTGCCTCGGGCCACTCGCTCTCTGTG[TCTCTCTCTCTCTCTCTCTCTCTCTC]CCCCCCTACGTAGTACCTACGTACAACTTCTTTGAATACGAGTAGCTAAAAGCAAACAACGG	CTCTTTAAGATGCCAAGTTGCCT	61.086	0.434783	CCGTTGTTTGCTTTTAGCTACTC	59.523	0.434783	131
isoform_104828_12204_2	TCTCTCTCTCTCTCTCTCTCTCTC	TC(2*12)	336	24	GAGTGGGTATGTGCAAGAAGATGGCCATCA[TCTCTCTCTCTCTCTCTCTCTCTC]TTTCTCTCTCTCTATATATATAAGGCCATAGCTGCAGAGAAATTCTGCAATGAAACGAGGATGAAAACAG	GAGTGGGTATGTGCAAGAAGATG	60.918	0.478261	CTGTTTTCATCCTCGTTTCATTG	60.863	0.391304	124
isoform_104896_12209_3	AGCAGCAGCAGCAGCAGC	AGC(3*6)	274	18	CTGGATATCATCATGGAGTGTCAGCGCTTGTGAAAGGGAGTTTCAGGAGAAACAGCAGGAACTTCTGCTTCAAA[AGCAGCAGCAGCAGCAGC]AACAGCAGCACGGATTCGCCTCCCCCTGCATTTGTTGATGAAGACACT	CTGGATATCATCATGGAGTGTCA	59.828	0.434783	AGTGTCTTCATCAACAAATGCAG	59.299	0.391304	140
isoform_104908_12210_1	CTCTCTCTCTCTCTCT	CT(2*8)	283	16	TCTGCTGTTATTTGTGCTCACTCAATTTCACTCCTATTGCACGCACACAGCAAATCTGCACAAGC[CTCTCTCTCTCTCTCT]CCCTCACTTCTCCAAGCTTCTTGAAGGCGGTGGGCTCGAAAAACTCACTCCTCTACATCCTACACACAGTGGCAA	TCTGCTGTTATTTGTGCTCACTC	59.576	0.434783	TTGCCACTGTGTGTAGGATGTAG	60.103	0.478261	156
isoform_104908_12210_2	CTCTCTCTCTCTCTCT	CT(2*8)	283	16	CTGCTGTTATTTGTGCTCACTCAATTTCACTCCTATTGCACGCACACAGCAAATCTGCACAAGC[CTCTCTCTCTCTCTCT]CCCTCACTTCTCCAAGCTTCTTGAAGGCGGTGGGCTCGAAAAACTCACTCCTCTACATCCTACACACAGTGGCAA	CTGCTGTTATTTGTGCTCACTCA	60.488	0.434783	TTGCCACTGTGTGTAGGATGTAG	60.103	0.478261	155
isoform_104908_12210_3	CTCTCTCTCTCTCTCT	CT(2*8)	283	16	CTGCTGTTATTTGTGCTCACTCAATTTCACTCCTATTGCACGCACACAGCAAATCTGCACAAGC[CTCTCTCTCTCTCTCT]CCCTCACTTCTCCAAGCTTCTTGAAG	CTGCTGTTATTTGTGCTCACTCA	60.488	0.434783	CTTCAAGAAGCTTGGAGAAGTGA	60.171	0.434783	106
isoform_104908_12210_4	CTCTCTCTCTCTCTCT	CT(2*8)	283	16	TTTGTGCTCACTCAATTTCACTCCTATTGCACGCACACAGCAAATCTGCACAAGC[CTCTCTCTCTCTCTCT]CCCTCACTTCTCCAAGCTTCTTGAAGGCGGTGGGCTCGAAAAACTCACTCCTCTACATCCTACACACAGTGGCAA	TTTGTGCTCACTCAATTTCACTC	59.415	0.391304	TTGCCACTGTGTGTAGGATGTAG	60.103	0.478261	146
isoform_104908_12210_5	CTCTCTCTCTCTCTCT	CT(2*8)	283	16	TTTGTGCTCACTCAATTTCACTCCTATTGCACGCACACAGCAAATCTGCACAAGC[CTCTCTCTCTCTCTCT]CCCTCACTTCTCCAAGCTTCTTGAA	TTTGTGCTCACTCAATTTCACTC	59.415	0.391304	TTCAAGAAGCTTGGAGAAGTGAG	60.171	0.434783	96
isoform_105157_12228_1	GATGATGATGATGAT	GAT(3*5)	429	15	GAGAAAAAGCTCGTCTCACAGAAGGATGCTCTTTCAGAAAGAAATATAGCTTGACCACTATGTGGTGGTTGCCATTGTCACTGTAATAATACC[GATGATGATGATGAT]CAGTCTTGCTTTTTCTTCATTAGGTTTTGCGTTTGCTTTGTAAAGTGAGTT	GAGAAAAAGCTCGTCTCACAGAA	60.178	0.434783	AACTCACTTTACAAAGCAAACGC	59.881	0.391304	159
isoform_105157_12228_2	GATGATGATGATGAT	GAT(3*5)	429	15	GAGAAAAAGCTCGTCTCACAGAAGGATGCTCTTTCAGAAAGAAATATAGCTTGACCACTATGTGGTGGTTGCCATTGTCACTGTAATAATACC[GATGATGATGATGAT]CAGTCTTGCTTTTTCTTCATTAGGTTTTGCGTTTGCTTTGTAAAGT	GAGAAAAAGCTCGTCTCACAGAA	60.178	0.434783	ACTTTACAAAGCAAACGCAAAAC	59.767	0.347826	154
isoform_105157_12228_4	GATGATGATGATGAT	GAT(3*5)	429	15	GAGAAAAAGCTCGTCTCACAGAAGGATGCTCTTTCAGAAAGAAATATAGCTTGACCACTATGTGGTGGTTGCCATTGTCACTGTAATAATACC[GATGATGATGATGAT]CAGTCTTGCTTTTTCTTCATTAGGTTTTGCGTTTG	GAGAAAAAGCTCGTCTCACAGAA	60.178	0.434783	CAAACGCAAAACCTAATGAAGAA	60.493	0.347826	143
isoform_105378_12239_1	CTCTCTCTCTCTCTCTCTCTCTCTCTCTCTCTCT	CT(2*17)	228	34	ATCGTAAAGCTGATGCGAGTAATGCGACGATGAGAAA[CTCTCTCTCTCTCTCTCTCTCTCTCTCTCTCTCT]CCCCCCCCCACAACAGGCTGACAACTGCCTGAAAAGTCTGGCGACTGCTAATTCAAAGCAGAAAACGAC	ATCGTAAAGCTGATGCGAGTAAT	59.348	0.391304	GTCGTTTTCTGCTTTGAATTAGC	59.47	0.391304	140
isoform_105378_12239_2	CTCTCTCTCTCTCTCTCTCTCTCTCTCTCTCTCT	CT(2*17)	228	34	GATCGTAAAGCTGATGCGAGTAATGCGACGATGAGAAA[CTCTCTCTCTCTCTCTCTCTCTCTCTCTCTCTCT]CCCCCCCCCACAACAGGCTGACAACTGCCTGAAAAGTCTGGCGACTGCTAATTCAAAGCAGAAAACGAC	GATCGTAAAGCTGATGCGAGTAA	60.752	0.434783	GTCGTTTTCTGCTTTGAATTAGC	59.47	0.391304	141
isoform_105378_12239_3	CTCTCTCTCTCTCTCTCTCTCTCTCTCTCTCTCT	CT(2*17)	228	34	TGACAAGCACAACCATTAACTGATCGTAAAGCTGATGCGAGTAATGCGACGATGAGAAA[CTCTCTCTCTCTCTCTCTCTCTCTCTCTCTCTCT]CCCCCCCCCACAACAGGCTGACAACTGCCTGAAAAGTCTGGCGACTGCTAATTCAAAGCAGAAA	TGACAAGCACAACCATTAACTGA	60.581	0.391304	TTTCTGCTTTGAATTAGCAGTCG	60.874	0.391304	157
isoform_105378_12239_4	CTCTCTCTCTCTCTCTCTCTCTCTCTCTCTCTCT	CT(2*17)	228	34	ATCGTAAAGCTGATGCGAGTAATGCGACGATGAGAAA[CTCTCTCTCTCTCTCTCTCTCTCTCTCTCTCTCT]CCCCCCCCCACAACAGGCTGACAACTGCCTGAAAAGTCTGGCGACTGCTAATTCAAAGCAGAAA	ATCGTAAAGCTGATGCGAGTAAT	59.348	0.391304	TTTCTGCTTTGAATTAGCAGTCG	60.874	0.391304	135
isoform_105378_12239_5	CTCTCTCTCTCTCTCTCTCTCTCTCTCTCTCTCT	CT(2*17)	228	34	CGTAAAGCTGATGCGAGTAATGCGACGATGAGAAA[CTCTCTCTCTCTCTCTCTCTCTCTCTCTCTCTCT]CCCCCCCCCACAACAGGCTGACAACTGCCTGAAAAGTCTGGCGACTGCTAATTCAAAGCAGAAAACGAC	CGTAAAGCTGATGCGAGTAATG	59.932	0.454545	GTCGTTTTCTGCTTTGAATTAGC	59.47	0.391304	138
isoform_105402_12240_1	GAGAGAGAGAGAGAGAGAGAGAGAGAGAGAGAGAGAGA	GA(2*19)	384	38	CACACATTGAGAGCAAATACAGCCAACACCATTGAAGCCCCTAGGCATCCCATCAGCAGTCCCCATGCTGTTCTGCAACTTCCCAT[GAGAGAGAGAGAGAGAGAGAGAGAGAGAGAGAGAGAGA]CGGGAGAGGCAAGTCCCTACCTTCTTGTCTT	CACACATTGAGAGCAAATACAGC	59.827	0.434783	AAGACAAGAAGGTAGGGACTTGC	60.175	0.478261	155
isoform_105402_12240_2	GAGAGAGAGAGAGAGAGAGAGAGAGAGAGAGAGAGAGA	GA(2*19)	384	38	AAATACAGCCAACACCATTGAAGCCCCTAGGCATCCCATCAGCAGTCCCCATGCTGTTCTGCAACTTCCCAT[GAGAGAGAGAGAGAGAGAGAGAGAGAGAGAGAGAGAGA]CGGGAGAGGCAAGTCCCTACCTTCTTGTCTT	AAATACAGCCAACACCATTGAAG	60.282	0.391304	AAGACAAGAAGGTAGGGACTTGC	60.175	0.478261	141
isoform_105402_12240_3	GAGAGAGAGAGAGAGAGAGAGAGAGAGAGAGAGAGAGA	GA(2*19)	384	38	CCACACATTGAGAGCAAATACAGCCAACACCATTGAAGCCCCTAGGCATCCCATCAGCAGTCCCCATGCTGTTCTGCAACTTCCCAT[GAGAGAGAGAGAGAGAGAGAGAGAGAGAGAGAGAGAGA]CGGGAGAGGCAAGTCCCTACCTTCTTGTCTT	CCACACATTGAGAGCAAATACAG	59.685	0.434783	AAGACAAGAAGGTAGGGACTTGC	60.175	0.478261	156
isoform_105402_12240_5	GAGAGAGAGAGAGAGAGAGAGAGAGAGAGAGAGAGAGA	GA(2*19)	384	38	TCCACACATTGAGAGCAAATACAGCCAACACCATTGAAGCCCCTAGGCATCCCATCAGCAGTCCCCATGCTGTTCTGCAACTTCCCAT[GAGAGAGAGAGAGAGAGAGAGAGAGAGAGAGAGAGAGA]CGGGAGAGGCAAGTCCCTACCTTCTTGTCTT	TCCACACATTGAGAGCAAATACA	60.549	0.391304	AAGACAAGAAGGTAGGGACTTGC	60.175	0.478261	157
isoform_10544_2051_3	GAGAGAGAGAGAGAGAGAGAGAGA	GA(2*12)	268	24	ATTCTTTAACCTCGTTGCCAATCCACGCGCTTATCCCGCAGCAGAAGC[GAGAGAGAGAGAGAGAGAGAGAGA]GCGCAAATTCTGCTGCGCAATGGGCGTGAACAAGTGAGTGAAGGTGTG	ATTCTTTAACCTCGTTGCCAATC	60.688	0.391304	CACACCTTCACTCACTTGTTCAC	59.72	0.478261	120
isoform_10544_2051_4	GAGAGAGAGAGAGAGAGAGAGAGA	GA(2*12)	268	24	ATTCTTTAACCTCGTTGCCAATCCACGCGCTTATCCCGCAGCAGAAGC[GAGAGAGAGAGAGAGAGAGAGAGA]GCGCAAATTCTGCTGCGCAATGGGCGTGAACAAGTGAGTGAAGGTGTGT	ATTCTTTAACCTCGTTGCCAATC	60.688	0.391304	ACACACCTTCACTCACTTGTTCA	59.72	0.434783	121
isoform_10544_2051_5	GAGAGAGAGAGAGAGAGAGAGAGA	GA(2*12)	268	24	ATTCTTTAACCTCGTTGCCAATCCACGCGCTTATCCCGCAGCAGAAGC[GAGAGAGAGAGAGAGAGAGAGAGA]GCGCAAATTCTGCTGCGCAATGGGCGTGAACAAGTGAGTGAAGGTGTGTG	ATTCTTTAACCTCGTTGCCAATC	60.688	0.391304	CACACACCTTCACTCACTTGTTC	59.72	0.478261	122
isoform_105577_12251_1	AGAGAGAGAGAGAGAGAGAGAGAGAGAGAG	AG(2*15)	172	30	TTGTTGCTCCTTCATGTGTTAGAGAGCAAGCATCAACAGAGAGAGGTCCATCCAC[AGAGAGAGAGAGAGAGAGAGAGAGAGAGAG]CGAGAGGGTTCAGTGAGTAGATCG	TTGTTGCTCCTTCATGTGTTAGA	59.799	0.391304	CGATCTACTCACTGAACCCTCTC	59.402	0.521739	109
isoform_10561_2058_3	GAGGAGGAGGAGGAG	GAG(3*5)	1597	15	AGGACTCAGAATGCGATGAACTAGATGCAGGTGATGGATTTGTT[GAGGAGGAGGAGGAG]GAAGAGGAAGAGGAGGAGGAGCAGCAGGAGGGCACAAAGATCCACAGGAAACAAGTGAAGGCAAGAAAAAGAGTGAAACGAGGGTAAGG	AGGACTCAGAATGCGATGAACTA	60.276	0.434783	CCTTACCCTCGTTTCACTCTTTT	60.044	0.434783	148
isoform_105728_12261_1	AGAGAGAGAGAGAGAGAGAGAG	AG(2*11)	478	22	CCCTCCTGTGCCCTAATAACTACTACCTGA[AGAGAGAGAGAGAGAGAGAGAG]ACCGAGAGGTTAGAGAGCCTACTCCTAGGACTGCTCCTGAGATGAGTC	CCCTCCTGTGCCCTAATAACTAC	60.255	0.521739	GACTCATCTCAGGAGCAGTCCTA	60.031	0.521739	100
isoform_105728_12261_2	AGAGAGAGAGAGAGAGAGAGAG	AG(2*11)	478	22	GATCATCTACTCACAGCTCCCAGTGCTCTCTCGCTCGTCCCCTCCTGTGCCCTAATAACTACTACCTGA[AGAGAGAGAGAGAGAGAGAGAG]ACCGAGAGGTTAGAGAGCCTACTCCTAGGACTGCTCCTGAGATGAGTC	GATCATCTACTCACAGCTCCCAG	60.282	0.521739	GACTCATCTCAGGAGCAGTCCTA	60.031	0.521739	139
isoform_105728_12261_3	AGAGAGAGAGAGAGAGAGAGAG	AG(2*11)	478	22	AGATCATCTACTCACAGCTCCCAGTGCTCTCTCGCTCGTCCCCTCCTGTGCCCTAATAACTACTACCTGA[AGAGAGAGAGAGAGAGAGAGAG]ACCGAGAGGTTAGAGAGCCTACTCCTAGGACTGCTCCTGAGATGAGTC	AGATCATCTACTCACAGCTCCCA	60.282	0.478261	GACTCATCTCAGGAGCAGTCCTA	60.031	0.521739	140
isoform_105728_12261_4	AGAGAGAGAGAGAGAGAGAGAG	AG(2*11)	478	22	GATCATCTACTCACAGCTCCCAGTGCTCTCTCGCTCGTCCCCTCCTGTGCCCTAATAACTACTACCTGA[AGAGAGAGAGAGAGAGAGAGAG]ACCGAGAGGTTAGAGAGCCTACTC	GATCATCTACTCACAGCTCCCAG	60.282	0.521739	GAGTAGGCTCTCTAACCTCTCGG	60.049	0.565217	115
isoform_105728_12261_5	AGAGAGAGAGAGAGAGAGAGAG	AG(2*11)	478	22	GATCATCTACTCACAGCTCCCAGTGCTCTCTCGCTCGTCCCCTCCTGTGCCCTAATAACTACTACCTGA[AGAGAGAGAGAGAGAGAGAGAG]ACCGAGAGGTTAGAGAGCCTACTCC	GATCATCTACTCACAGCTCCCAG	60.282	0.521739	GGAGTAGGCTCTCTAACCTCTCG	60.049	0.565217	116
isoform_105841_12267_1	CAGCAGCAGCAGCAGCAG	CAG(3*6)	300	18	CAGCTCTACAAACAGGTCCAAATCATGCGGCTACCAGGACGTCCACGTCATGTGGTCTCTCCTGATCCGA[CAGCAGCAGCAGCAGCAG]GATGCATTCCCGCAGCAGCGTTATTCTCCAAGAACGGTAGTAATCATGTATGCAGGCGTTC	CAGCTCTACAAACAGGTCCAAAT	59.703	0.434783	GAACGCCTGCATACATGATTACT	60.404	0.434783	149
isoform_105841_12267_2	CAGCAGCAGCAGCAGCAG	CAG(3*6)	300	18	GCTCTACAAACAGGTCCAAATCATGCGGCTACCAGGACGTCCACGTCATGTGGTCTCTCCTGATCCGA[CAGCAGCAGCAGCAGCAG]GATGCATTCCCGCAGCAGCGTTATTCTCCAAGAACGGTAGTAATCATGTATGCAGGCGTTC	GCTCTACAAACAGGTCCAAATCA	60.528	0.434783	GAACGCCTGCATACATGATTACT	60.404	0.434783	147
isoform_105841_12267_3	CAGCAGCAGCAGCAGCAG	CAG(3*6)	300	18	CAGCTCTACAAACAGGTCCAAATCATGCGGCTACCAGGACGTCCACGTCATGTGGTCTCTCCTGATCCGA[CAGCAGCAGCAGCAGCAG]GATGCATTCCCGCAGCAGCGTTATTCTCCAAGAACGGTAGTAATCATGTATGCAGGC	CAGCTCTACAAACAGGTCCAAAT	59.703	0.434783	GCCTGCATACATGATTACTACCG	60.752	0.478261	145
isoform_105841_12267_4	CAGCAGCAGCAGCAGCAG	CAG(3*6)	300	18	CAGCTCTACAAACAGGTCCAAATCATGCGGCTACCAGGACGTCCACGTCATGTGGTCTCTCCTGATCCGA[CAGCAGCAGCAGCAGCAG]GATGCATTCCCGCAGCAGCGTTATTCTCCAAGAACGGTAGTAATCATGTATGCAGGCG	CAGCTCTACAAACAGGTCCAAAT	59.703	0.434783	CGCCTGCATACATGATTACTACC	60.752	0.478261	146
isoform_105841_12267_5	CAGCAGCAGCAGCAGCAG	CAG(3*6)	300	18	CTACAAACAGGTCCAAATCATGCGGCTACCAGGACGTCCACGTCATGTGGTCTCTCCTGATCCGA[CAGCAGCAGCAGCAGCAG]GATGCATTCCCGCAGCAGCGTTATTCTCCAAGAACGGTAGTAATCATGTATGCAGGCGTTC	CTACAAACAGGTCCAAATCATGC	60.764	0.434783	GAACGCCTGCATACATGATTACT	60.404	0.434783	144
isoform_105906_12272_1	GAGAGAGAGAGAGA	GA(2*7)	199	14	CTCTAGAGGTGCGTGTGAAGTGCATAT[GAGAGAGAGAGAGA]TGAGAGAGAGAAGAGAGAGATGGAGCTGGGGAGGTTCATCAAGGCCAAGTACGAGAAGCTGGAAGCAAGTTAAAAATGGAGCAAGTACAAGAACGGTGGATCTC	CTCTAGAGGTGCGTGTGAAGTG	60.111	0.545455	GAGATCCACCGTTCTTGTACTTG	60.047	0.478261	145
isoform_105906_12272_2	GAGAGAGAGAGAGA	GA(2*7)	199	14	CTCTAGAGGTGCGTGTGAAGTGCATAT[GAGAGAGAGAGAGA]TGAGAGAGAGAAGAGAGAGATGGAGCTGGGGAGGTTCATCAAGGCCAAGTACGAGAAGCTGGAAGCAAGTTAAAAATGGAGCAAGTACAAGAACGGTGGATCTCA	CTCTAGAGGTGCGTGTGAAGTG	60.111	0.545455	TGAGATCCACCGTTCTTGTACTT	60.047	0.434783	146
isoform_105906_12272_3	GAGAGAGAGAGAGA	GA(2*7)	199	14	CTCTAGAGGTGCGTGTGAAGTGCATAT[GAGAGAGAGAGAGA]TGAGAGAGAGAAGAGAGAGATGGAGCTGGGGAGGTTCATCAAGGCCAAGTACGAGAAGCTGGAAGCAAGTTAAAAATGGAGCAA	CTCTAGAGGTGCGTGTGAAGTG	60.111	0.545455	TTGCTCCATTTTTAACTTGCTTC	59.795	0.347826	125
isoform_105906_12272_4	GAGAGAGAGAGAGA	GA(2*7)	199	14	CTCTAGAGGTGCGTGTGAAGTGCATAT[GAGAGAGAGAGAGA]TGAGAGAGAGAAGAGAGAGATGGAGCTGGGGAGGTTCATCAAGGCCAAGTACGAGAAGCTGGAAGCAAGTTAAAAATGGAGCAAGTACAAGAACG	CTCTAGAGGTGCGTGTGAAGTG	60.111	0.545455	CGTTCTTGTACTTGCTCCATTTT	59.716	0.391304	136
isoform_105906_12272_5	GAGAGAGAGAGAGA	GA(2*7)	199	14	CTCTAGAGGTGCGTGTGAAGTGCATAT[GAGAGAGAGAGAGA]TGAGAGAGAGAAGAGAGAGATGGAGCTGGGGAGGTTCATCAAGGCCAAGTACGAGAAGCTGGAAGCAAGTTAAAAATGGAGCAAGTACAAGAACGGTGGATCTCAC	CTCTAGAGGTGCGTGTGAAGTG	60.111	0.545455	GTGAGATCCACCGTTCTTGTACT	59.561	0.478261	147
isoform_10613_2072_4	CCCCCCCCCCCCCCC	C(1*15)	188	15	ACTACCTGACTCCTGCTTCTGTGAAACCCCCCCCACCCCCCCCCCCCCCCTTTCACTCCTTCCCTTTTCCT[TCTCTCTCTCTCTC]GCTCTCGGGAAGATCCCTGAGCACACTATGGT	ACTACCTGACTCCTGCTTCTGTG	59.989	0.521739	ACCATAGTGTGCTCAGGGATCT	60.023	0.5	117
isoform_10613_2072_5	CCCCCCCCCCCCCCC	C(1*15)	188	15	CACTACCTGACTCCTGCTTCTGTGAAACCCCCCCCACCCCCCCCCCCCCCCTTTCACTCCTTCCCTTTTCCT[TCTCTCTCTCTCTC]GCTCTCGGGAAGATCCCTGAGCACACTATGGT	CACTACCTGACTCCTGCTTCTGT	59.989	0.521739	ACCATAGTGTGCTCAGGGATCT	60.023	0.5	118
isoform_10613_2073_1	TCTCTCTCTCTCTC	TC(2*7)	224	14	ACTACCTGACTCCTGCTTCTGTGAAACCCCCCCCACCCCCCCCCCCCCCCTTTCACTCCTTCCCTTTTCCT[TCTCTCTCTCTCTC]GCTCTCGGGAAGATCCCTGAGCACACTATGGT	ACTACCTGACTCCTGCTTCTGTG	59.989	0.521739	ACCATAGTGTGCTCAGGGATCT	60.023	0.5	117
isoform_10613_2073_2	TCTCTCTCTCTCTC	TC(2*7)	224	14	CACTACCTGACTCCTGCTTCTGTGAAACCCCCCCCACCCCCCCCCCCCCCCTTTCACTCCTTCCCTTTTCCT[TCTCTCTCTCTCTC]GCTCTCGGGAAGATCCCTGAGCACACTATGGT	CACTACCTGACTCCTGCTTCTGT	59.989	0.521739	ACCATAGTGTGCTCAGGGATCT	60.023	0.5	118
isoform_10613_2073_3	TCTCTCTCTCTCTC	TC(2*7)	224	14	ACTACCTGACTCCTGCTTCTGTGAAACCCCCCCCACCCCCCCCCCCCCCCTTTCACTCCTTCCCTTTTCCT[TCTCTCTCTCTCTC]GCTCTCGGGAAGATCCCTGAGCACACTATGGTGGCTCTCGCAACGATCCGTCAATCCCATTCTCACTCATA	ACTACCTGACTCCTGCTTCTGTG	59.989	0.521739	TATGAGTGAGAATGGGATTGACG	61.232	0.434783	156
isoform_10613_2073_4	TCTCTCTCTCTCTC	TC(2*7)	224	14	CACTACCTGACTCCTGCTTCTGTGAAACCCCCCCCACCCCCCCCCCCCCCCTTTCACTCCTTCCCTTTTCCT[TCTCTCTCTCTCTC]GCTCTCGGGAAGATCCCTGAGCACACTATGGTGGCTCTCGCAACGATCCGTCAATCCCATTCTCACTCATA	CACTACCTGACTCCTGCTTCTGT	59.989	0.521739	TATGAGTGAGAATGGGATTGACG	61.232	0.434783	157
isoform_10613_2073_5	TCTCTCTCTCTCTC	TC(2*7)	224	14	ACTACCTGACTCCTGCTTCTGTGAAACCCCCCCCACCCCCCCCCCCCCCCTTTCACTCCTTCCCTTTTCCT[TCTCTCTCTCTCTC]GCTCTCGGGAAGATCCCTGAGCACACTATGGT	ACTACCTGACTCCTGCTTCTGTG	59.989	0.521739	ACCATAGTGTGCTCAGGGATCTT	61.271	0.478261	117
isoform_106285_12293_2	CTCTCTCTCTCTCTCTCTCT	CT(2*10)	194	20	GGAAGTTCACATGAAATTATGGCCTATCTCCTTCGACCCCTCTCGCTCTATCTCG[CTCTCTCTCTCTCTCTCTCT]TTATACACATGTATGCAACATGGGCCTCTTCAGTGATACCGTCATTTGGGAACTCCACCATCTACATAACAATCCC	GGAAGTTCACATGAAATTATGGC	59.735	0.391304	GGGATTGTTATGTAGATGGTGGA	59.959	0.434783	151
isoform_106285_12293_4	CTCTCTCTCTCTCTCTCTCT	CT(2*10)	194	20	ATGACCTCTGTACGAGATTGGAAGTTCACATGAAATTATGGCCTATCTCCTTCGACCCCTCTCGCTCTATCTCG[CTCTCTCTCTCTCTCTCTCT]TTATACACATGTATGCAACATGGGCCTCTTCAGTGATACCGTCATTT	ATGACCTCTGTACGAGATTGGAA	60.012	0.434783	AAATGACGGTATCACTGAAGAGG	59.535	0.434783	141
isoform_106285_12293_5	CTCTCTCTCTCTCTCTCTCT	CT(2*10)	194	20	AATTATGGCCTATCTCCTTCGACCCCTCTCGCTCTATCTCG[CTCTCTCTCTCTCTCTCTCT]TTATACACATGTATGCAACATGGGCCTCTTCAGTGATACCGTCATTT	AATTATGGCCTATCTCCTTCGAC	59.853	0.434783	AAATGACGGTATCACTGAAGAGG	59.535	0.434783	108
isoform_106434_12309_1	CTCTCTCTCTCTCT	CT(2*7)	301	14	AATTTCTGGAACCGGAAAGTAAACTAGTTTCTAATATCTCTTACAGAAAAGACTAAAAGAA[CTCTCTCTCTCTCT]ATCAGATTCTATAGTATCATCTCATCTTTCTTATAGTATCCCTATGAATACTATGACTAGAACCATATCCAAGAAGCATCT	AATTTCTGGAACCGGAAAGTAAA	60.214	0.347826	AGATGCTTCTTGGATATGGTTCT	58.31	0.391304	156
isoform_106434_12309_2	CTCTCTCTCTCTCT	CT(2*7)	301	14	ATTTCTGGAACCGGAAAGTAAACTAGTTTCTAATATCTCTTACAGAAAAGACTAAAAGAA[CTCTCTCTCTCTCT]ATCAGATTCTATAGTATCATCTCATCTTTCTTATAGTATCCCTATGAATACTATGACTAGAACCATATCCAAGAAGCATCT	ATTTCTGGAACCGGAAAGTAAAC	59.779	0.391304	AGATGCTTCTTGGATATGGTTCT	58.31	0.391304	155
isoform_106434_12309_3	CTCTCTCTCTCTCT	CT(2*7)	301	14	AATTTCTGGAACCGGAAAGTAAACTAGTTTCTAATATCTCTTACAGAAAAGACTAAAAGAA[CTCTCTCTCTCTCT]ATCAGATTCTATAGTATCATCTCATCTTTCTTATAGTATCCCTATGAATACTATGACTAGAACCATATCCAAGAAGCATCTACA	AATTTCTGGAACCGGAAAGTAAA	60.214	0.347826	TGTAGATGCTTCTTGGATATGGTT	59.082	0.375	159
isoform_106434_12309_4	CTCTCTCTCTCTCT	CT(2*7)	301	14	ATTTCTGGAACCGGAAAGTAAACTAGTTTCTAATATCTCTTACAGAAAAGACTAAAAGAA[CTCTCTCTCTCTCT]ATCAGATTCTATAGTATCATCTCATCTTTCTTATAGTATCCCTATGAATACTATGACTAGAACCATATCCAAGAAGCATCTACA	ATTTCTGGAACCGGAAAGTAAAC	59.779	0.391304	TGTAGATGCTTCTTGGATATGGTT	59.082	0.375	158
isoform_106434_12309_5	CTCTCTCTCTCTCT	CT(2*7)	301	14	AATTTCTGGAACCGGAAAGTAAACTAGTTTCTAATATCTCTTACAGAAAAGACTAAAAGAA[CTCTCTCTCTCTCT]ATCAGATTCTATAGTATCATCTCATCTTTCTTATAGTATCCCTATGAATACTATGACTAGAACCATATCCAAGAAGCATCTACAG	AATTTCTGGAACCGGAAAGTAAA	60.214	0.347826	CTGTAGATGCTTCTTGGATATGGTT	59.938	0.4	160
isoform_106493_12312_5	CAACAACAACAACAA	CAA(3*5)	216	15	GGCTATGAGCGTGGTGAATAGTGGCTACTATGAGCCGCCACGGTGAAGGAGAAGGCTACCGTGT[CAACAACAACAACAA]CTACCACCGCAATGAGCGCTTGGGCGAGCTCGGTGCTGTGGCTGCTGGGGCCTTTGCATTGTTTGAAGAGAAT	GGCTATGAGCGTGGTGAATAG	59.744	0.52381	ATTCTCTTCAAACAATGCAAAGG	59.659	0.347826	152
isoform_106521_12314_4	TCCTCCTCCTCCTCC	TCC(3*5)	412	15	CTCACCCTCCTCCTTACCACTACAAGTCCCCCCT[TCCTCCTCCTCCTCC]TAAAGCTAAGTACCACTACAAGTCCCCTCCTCCTCCTCCCTACTAAGCCTGAGCGTTTTTCAAGACCATAG	CTCACCCTCCTCCTTACCACTAC	60.406	0.565217	CTATGGTCTTGAAAAACGCTCAG	60.295	0.434783	120
isoform_106523_12315_3	GTGTGTGTGTGT	GT(2*6)	245	12	GAGCTCTTCTGTCGGGTTTTATTGTTGCTGTCGTTGTCGTGTGTGTG[GTGTGTGTGTGT]GAGTGTGTGTGTGCAGAGCGTGTGTGTGTGAGAGAGAGTGAGAGAAAGAGAGAGAATGTGGCACTGGCTTTGGTAGTACCTGGCAAGTGAC	GAGCTCTTCTGTCGGGTTTTATT	60.14	0.434783	GTCACTTGCCAGGTACTACCAAA	60.45	0.478261	150
isoform_10673_2087_1	CTCTCTCTCTCTCTCT	CT(2*8)	268	16	ACAACAAACACACGAACTCACA[CTCTCTCTCTCTCTCT]GGCCTGCCGTTTCTGTCTCTTTAGCTCCTCTGCTTAATTCCACTGCATTTGTACACCCGCATCAATCATTTTGAAAAGAAGACGC	ACAACAAACACACGAACTCACAC	60.029	0.434783	GCGTCTTCTTTTCAAAATGATTG	60.121	0.347826	123
isoform_10673_2087_2	CTCTCTCTCTCTCTCT	CT(2*8)	268	16	ACACAACAAACACACGAACTCACA[CTCTCTCTCTCTCTCT]GGCCTGCCGTTTCTGTCTCTTTAGCTCCTCTGCTTAATTCCACTGCATTTGTACACCCGCATCAATCATTTTGAAAAGAAGACGC	ACACAACAAACACACGAACTCAC	60.029	0.434783	GCGTCTTCTTTTCAAAATGATTG	60.121	0.347826	125
isoform_10673_2087_3	CTCTCTCTCTCTCTCT	CT(2*8)	268	16	ACAACAAACACACGAACTCACA[CTCTCTCTCTCTCTCT]GGCCTGCCGTTTCTGTCTCTTTAGCTCCTCTGCTTAATTCCACTGCATTT	ACAACAAACACACGAACTCACAC	60.029	0.434783	AAATGCAGTGGAATTAAGCAGAG	59.806	0.391304	88
isoform_10673_2087_4	CTCTCTCTCTCTCTCT	CT(2*8)	268	16	ACACAACAAACACACGAACTCACA[CTCTCTCTCTCTCTCT]GGCCTGCCGTTTCTGTCTCTTTAGCTCCTCTGCTTAATTCCACTGCATTT	ACACAACAAACACACGAACTCAC	60.029	0.434783	AAATGCAGTGGAATTAAGCAGAG	59.806	0.391304	90
isoform_10673_2087_5	CTCTCTCTCTCTCTCT	CT(2*8)	268	16	ACAACAAACACACGAACTCACA[CTCTCTCTCTCTCTCT]GGCCTGCCGTTTCTGTCTCTTTAGCTCCTCTGCTTAATTCCACTGCATTTGTA	ACAACAAACACACGAACTCACAC	60.029	0.434783	TACAAATGCAGTGGAATTAAGCA	59.674	0.347826	91
isoform_10676_2088_5	TCTCTCTCTCTCTC	TC(2*7)	1165	14	GACCGGAATCACACAGTTGTATCACCTTTTTGTCTCATAGGCCGAGTTCGGCCCTCTAAGAGATCGTTAATAGA[TCTCTCTCTCTCTC]TTCTCTCGTCTAGGTCCAGCTTTGGACTCGACAGGAGCGTTAATCT	GACCGGAATCACACAGTTGTATC	60.665	0.478261	AGATTAACGCTCCTGTCGAGTC	59.913	0.5	134
isoform_10676_2091_1	TCTCTCTCTCTCTCTCTCTCTC	TC(2*11)	1459	22	AGTGACTCAAACCAACAAGCAACGGCACACAAACGTAGCACTTGGCTCATGGCAAACTCCTGCGTAGGAAGGGGCACGCACAAGTTCG[TCTCTCTCTCTCTCTCTCTCTC]TGTGTACCATGGTCTGGATGAGC	AGTGACTCAAACCAACAAGCAAC	60.614	0.434783	GCTCATCCAGACCATGGTACAC	61.739	0.545455	133
isoform_10676_2091_2	TCTCTCTCTCTCTCTCTCTCTC	TC(2*11)	1459	22	AGTGACTCAAACCAACAAGCAACGGCACACAAACGTAGCACTTGGCTCATGGCAAACTCCTGCGTAGGAAGGGGCACGCACAAGTTCG[TCTCTCTCTCTCTCTCTCTCTC]TGTGTACCATGGTCTGGATGAGC	AGTGACTCAAACCAACAAGCAA	59.819	0.409091	GCTCATCCAGACCATGGTACAC	61.739	0.545455	133
isoform_10676_2091_3	TCTCTCTCTCTCTCTCTCTCTC	TC(2*11)	1459	22	GTACCAGCACAAATTAACAGCGGCAGTGACTCAAACCAACAAGCAACGGCACACAAACGTAGCACTTGGCTCATGGCAAACTCCTGCGTAGGAAGGGGCACGCACAAGTTCG[TCTCTCTCTCTCTCTCTCTCTC]TGTGTACCATGGTCTGGATGAGC	GTACCAGCACAAATTAACAGCG	59.712	0.454545	GCTCATCCAGACCATGGTACAC	61.739	0.545455	157
isoform_10676_2091_4	TCTCTCTCTCTCTCTCTCTCTC	TC(2*11)	1459	22	GTGACTCAAACCAACAAGCAACGGCACACAAACGTAGCACTTGGCTCATGGCAAACTCCTGCGTAGGAAGGGGCACGCACAAGTTCG[TCTCTCTCTCTCTCTCTCTCTC]TGTGTACCATGGTCTGGATGAGC	GTGACTCAAACCAACAAGCAAC	59.685	0.454545	GCTCATCCAGACCATGGTACAC	61.739	0.545455	132
isoform_10676_2091_5	TCTCTCTCTCTCTCTCTCTCTC	TC(2*11)	1459	22	AAATTAACAGCGGCAGTGACTCAAACCAACAAGCAACGGCACACAAACGTAGCACTTGGCTCATGGCAAACTCCTGCGTAGGAAGGGGCACGCACAAGTTCG[TCTCTCTCTCTCTCTCTCTCTC]TGTGTACCATGGTCTGGATGAGC	AAATTAACAGCGGCAGTGACTC	60.67	0.454545	GCTCATCCAGACCATGGTACAC	61.739	0.545455	147
isoform_106847_12327_1	GAGAGAGAGAGAGAGAGAGAGAGAGAGAGA	GA(2*15)	242	30	CAGATTGGAGCCTAGTTGTGACTTGTGCGCTT[GAGAGAGAGAGAGAGAGAGAGAGAGAGAGA]GTGTTGCCTTGTTCGCGCCCACCAGTTCACCGCTCACCAACAGCTGCAAGAAG	CAGATTGGAGCCTAGTTGTGACT	59.824	0.478261	CTTCTTGCAGCTGTTGGTGAG	61.148	0.52381	115
isoform_106847_12327_2	GAGAGAGAGAGAGAGAGAGAGAGAGAGAGA	GA(2*15)	242	30	GATTGGAGCCTAGTTGTGACTTGTGCGCTT[GAGAGAGAGAGAGAGAGAGAGAGAGAGAGA]GTGTTGCCTTGTTCGCGCCCACCAGTTCACCGCTCACCAACAGCTGCAAGAAG	GATTGGAGCCTAGTTGTGACTTG	60.178	0.478261	CTTCTTGCAGCTGTTGGTGAG	61.148	0.52381	113
isoform_106847_12327_3	GAGAGAGAGAGAGAGAGAGAGAGAGAGAGA	GA(2*15)	242	30	AACAGATTGGAGCCTAGTTGTGACTTGTGCGCTT[GAGAGAGAGAGAGAGAGAGAGAGAGAGAGA]GTGTTGCCTTGTTCGCGCCCACCAGTTCACCGCTCACCAACAGCTGCAAGAAG	AACAGATTGGAGCCTAGTTGTGA	60.178	0.434783	CTTCTTGCAGCTGTTGGTGAG	61.148	0.52381	117
isoform_106847_12327_4	GAGAGAGAGAGAGAGAGAGAGAGAGAGAGA	GA(2*15)	242	30	CAGATTGGAGCCTAGTTGTGACTTGTGCGCTT[GAGAGAGAGAGAGAGAGAGAGAGAGAGAGA]GTGTTGCCTTGTTCGCGCCCACCAGTTCACCGCTCACCAACAGCTGCAAGAA	CAGATTGGAGCCTAGTTGTGACT	59.824	0.478261	TTCTTGCAGCTGTTGGTGAG	60.175	0.5	114
isoform_106847_12327_5	GAGAGAGAGAGAGAGAGAGAGAGAGAGAGA	GA(2*15)	242	30	CAGATTGGAGCCTAGTTGTGACTTGTGCGCTT[GAGAGAGAGAGAGAGAGAGAGAGAGAGAGA]GTGTTGCCTTGTTCGCGCCCACCAGTTCACCGCTCACCAACAGCTGCAAGAAG	CAGATTGGAGCCTAGTTGTGACT	59.824	0.478261	CTTCTTGCAGCTGTTGGTGA	60.175	0.5	115
isoform_106924_12329_1	CTCTCTCTCTCTCT	CT(2*7)	463	14	TTACAAAGCCCCTCCACAACGGATGGCTGGGGGACCAAGGGCTGGTTAAATC[CTCTCTCTCTCTCT]CACACACAGAGAAAAGTGCTACTTCTTTGTACCCTCCTACAGCACAGCTATCTCAGAAGGAAGA	TTACAAAGCCCCTCCACAAC	59.971	0.5	TCTTCCTTCTGAGATAGCTGTGC	60.165	0.478261	130
isoform_106924_12329_2	CTCTCTCTCTCTCT	CT(2*7)	463	14	TTACAAAGCCCCTCCACAACGGATGGCTGGGGGACCAAGGGCTGGTTAAATC[CTCTCTCTCTCTCT]CACACACAGAGAAAAGTGCTACTTCTTTGTACCCTCCTACAGCACAGCTATCTCAGAAGGAAGACTAAAGTTGTCTTCCCCACTAGCA	TTACAAAGCCCCTCCACAAC	59.971	0.5	TGCTAGTGGGGAAGACAACTTTA	60.169	0.434783	154
isoform_106924_12329_3	CTCTCTCTCTCTCT	CT(2*7)	463	14	TTACAAAGCCCCTCCACAACGGATGGCTGGGGGACCAAGGGCTGGTTAAATC[CTCTCTCTCTCTCT]CACACACAGAGAAAAGTGCTACTTCTTTGTACCCTCCTACAGCA	TTACAAAGCCCCTCCACAAC	59.971	0.5	TGCTGTAGGAGGGTACAAAGAAG	59.827	0.478261	110
isoform_106924_12329_4	CTCTCTCTCTCTCT	CT(2*7)	463	14	CTTTACAAAGCCCCTCCACAACGGATGGCTGGGGGACCAAGGGCTGGTTAAATC[CTCTCTCTCTCTCT]CACACACAGAGAAAAGTGCTACTTCTTTGTACCCTCCTACAGCACAGCTATCTCAGAAGGAAGA	CTTTACAAAGCCCCTCCACAAC	62.057	0.5	TCTTCCTTCTGAGATAGCTGTGC	60.165	0.478261	132
isoform_106924_12329_5	CTCTCTCTCTCTCT	CT(2*7)	463	14	CTTTACAAAGCCCCTCCACAACGGATGGCTGGGGGACCAAGGGCTGGTTAAATC[CTCTCTCTCTCTCT]CACACACAGAGAAAAGTGCTACTTCTTTGTACCCTCCTACAGCACAGCTATCTCAGAAGGAAGACTAAAGTTGTCTTCCCCACTAGCA	CTTTACAAAGCCCCTCCACAAC	62.057	0.5	TGCTAGTGGGGAAGACAACTTTA	60.169	0.434783	156
isoform_106931_12331_1	CATCATCATCATCATCATCATCAT	CAT(3*8)	301	24	GTGAAAAGAAAAAGGATGAGCACCTCATTGCCGATTTCAATGGCTACCAAGGGAGCAGTCATGGA[CATCATCATCATCATCATCATCAT]CAGAAGCACCATCACTTTGGGTGACAATTA	GTGAAAAGAAAAAGGATGAGCAC	59.299	0.391304	TAATTGTCACCCAAAGTGATGGT	60.508	0.391304	119
isoform_106931_12331_2	CATCATCATCATCATCATCATCAT	CAT(3*8)	301	24	ACCGTGAAAAGAAAAAGGATGAGCACCTCATTGCCGATTTCAATGGCTACCAAGGGAGCAGTCATGGA[CATCATCATCATCATCATCATCAT]CAGAAGCACCATCACTTTGGGTGACAATTA	ACCGTGAAAAGAAAAAGGATGAG	60.829	0.391304	TAATTGTCACCCAAAGTGATGGT	60.508	0.391304	122
isoform_106931_12331_3	CATCATCATCATCATCATCATCAT	CAT(3*8)	301	24	ACCGTGAAAAGAAAAAGGATGAGCACCTCATTGCCGATTTCAATGGCTACCAAGGGAGCAGTCATGGA[CATCATCATCATCATCATCATCAT]CAGAAGCACCATCACTTTGGGTGACAATTA	ACCGTGAAAAGAAAAAGGATGA	59.98	0.363636	TAATTGTCACCCAAAGTGATGGT	60.508	0.391304	122
isoform_106931_12331_4	CATCATCATCATCATCATCATCAT	CAT(3*8)	301	24	CCGTGAAAAGAAAAAGGATGAGCACCTCATTGCCGATTTCAATGGCTACCAAGGGAGCAGTCATGGA[CATCATCATCATCATCATCATCAT]CAGAAGCACCATCACTTTGGGTGACAATTA	CCGTGAAAAGAAAAAGGATGAG	60.102	0.409091	TAATTGTCACCCAAAGTGATGGT	60.508	0.391304	121
isoform_106931_12331_5	CATCATCATCATCATCATCATCAT	CAT(3*8)	301	24	GTGAAAAGAAAAAGGATGAGCACCTCATTGCCGATTTCAATGGCTACCAAGGGAGCAGTCATGGA[CATCATCATCATCATCATCATCAT]CAGAAGCACCATCACTTTGGGTGACAATTAA	GTGAAAAGAAAAAGGATGAGCAC	59.299	0.391304	TTAATTGTCACCCAAAGTGATGG	60.97	0.391304	120
isoform_107185_12344_1	TCTCTCTCTCTCTCTC	TC(2*8)	436	16	TAGATAGACGGAGGGATGTTGAATGAGCAAGGCGAGGTAGTCCGCAAAAAACGCTCTTTCTA[TCTCTCTCTCTCTCTC]TGTCTCTCTCTCCATCAGGCAATTGCCTGCATCTTGCACTGGCAGGTTTCCATTATGTATAGGC	TAGATAGACGGAGGGATGTTGAA	59.973	0.434783	GCCTATACATAATGGAAACCTGC	58.96	0.434783	142
isoform_107185_12344_2	TCTCTCTCTCTCTCTC	TC(2*8)	436	16	TAGATAGACGGAGGGATGTTGAATGAGCAAGGCGAGGTAGTCCGCAAAAAACGCTCTTTCTA[TCTCTCTCTCTCTCTC]TGTCTCTCTCTCCATCAGGCAATTGCCTGCATCTTGCACTGGCAGGTTTCCATTATGTA	TAGATAGACGGAGGGATGTTGAA	59.973	0.434783	TACATAATGGAAACCTGCCAGTG	61.113	0.434783	137
isoform_107185_12344_5	TCTCTCTCTCTCTCTC	TC(2*8)	436	16	TAGATAGACGGAGGGATGTTGAATGAGCAAGGCGAGGTAGTCCGCAAAAAACGCTCTTTCTA[TCTCTCTCTCTCTCTC]TGTCTCTCTCTCCATCAGGCAATTGCCTGCATCTTGCACTGGCAGGTTTCCATTATGTAT	TAGATAGACGGAGGGATGTTGAA	59.973	0.434783	ATACATAATGGAAACCTGCCAGT	58.837	0.391304	138
isoform_107228_12345_1	CTCTCTCTCTCTCTCTCT	CT(2*9)	245	18	ACTGACAGCTCAAGGGAAGAAGCCCCTGTGGACGAAGCACAAGAGGAGGA[CTCTCTCTCTCTCTCTCT]CATTGGCTAGGTTTGCTCGTTTGTCCACAATTTGTGGCTGAGCTTTCCATGGAAGCTACGCTTTGTGCATCTTACCGAGGTCATGTCGTAC	ACTGACAGCTCAAGGGAAGAAG	60.053	0.5	GTACGACATGACCTCGGTAAGAT	59.429	0.478261	159
isoform_107228_12345_2	CTCTCTCTCTCTCTCTCT	CT(2*9)	245	18	ACTGACAGCTCAAGGGAAGAAGCCCCTGTGGACGAAGCACAAGAGGAGGA[CTCTCTCTCTCTCTCTCT]CATTGGCTAGGTTTGCTCGTTTGTCCACAATTTGTGGCTGAGCTTTCCATGGAAGCTACGCTTTGTGCATCTTACCGAGGTCATGTCGTA	ACTGACAGCTCAAGGGAAGAAG	60.053	0.5	TACGACATGACCTCGGTAAGATG	61.275	0.478261	158
isoform_107228_12345_3	CTCTCTCTCTCTCTCTCT	CT(2*9)	245	18	ACTGACAGCTCAAGGGAAGAAGCCCCTGTGGACGAAGCACAAGAGGAGGA[CTCTCTCTCTCTCTCTCT]CATTGGCTAGGTTTGCTCGTTTGTCCACAATTTGTGGCTGAGCTTTCCATGGAAGCTACGCTTTGTGCATCTTACCGAGGTCATGTCGTAC	ACTGACAGCTCAAGGGAAGAAG	60.053	0.5	GTACGACATGACCTCGGTAAGA	59.125	0.5	159
isoform_107228_12345_4	CTCTCTCTCTCTCTCTCT	CT(2*9)	245	18	ACTGACAGCTCAAGGGAAGAAGCCCCTGTGGACGAAGCACAAGAGGAGGA[CTCTCTCTCTCTCTCTCT]CATTGGCTAGGTTTGCTCGTTTGTCCACAAT	ACTGACAGCTCAAGGGAAGAAG	60.053	0.5	ATTGTGGACAAACGAGCAAAC	60.03	0.428571	99
isoform_107228_12345_5	CTCTCTCTCTCTCTCTCT	CT(2*9)	245	18	ACTGACAGCTCAAGGGAAGAAGCCCCTGTGGACGAAGCACAAGAGGAGGA[CTCTCTCTCTCTCTCTCT]CATTGGCTAGGTTTGCTCGTTTGTCCACAATTTGT	ACTGACAGCTCAAGGGAAGAAG	60.053	0.5	ACAAATTGTGGACAAACGAGC	60.03	0.428571	103
isoform_107247_12348_3	CAGCAGCAGCAGCAGCAGCAG	CAG(3*7)	216	21	TCATCATAACCTTCGTCCACATTACGGGCACATTT[CAGCAGCAGCAGCAGCAGCAG]CCGCCATCAAACCTGCACCCCAAGCATGGAGATGGTGCAGAAGGGGCCGCTATACGGCTTGATATACGAAGAACG	TCATCATAACCTTCGTCCACATT	60.607	0.391304	CGTTCTTCGTATATCAAGCCGTA	60.501	0.434783	131
isoform_107261_12349_1	CTCTCTCTCTCT	CT(2*6)	394	12	CAGATCTTGCCTCTCCAAGTGCCTCTCTCAGAGCAGTGGAGCACGGATTCAGCTGCTGCACTTGCCATGGCTCTCCCCGCCTCTCCTCTCTCC[CTCTCTCTCTCT]CCCACCCCCCCTCGAGCGCATTGCCTTGGGGCGGCGTTGTGCTGAGTGGATGAG	CAGATCTTGCCTCTCCAAGTG	59.997	0.52381	CTCATCCACTCAGCACAACG	60.463	0.55	159
isoform_107261_12349_2	CTCTCTCTCTCT	CT(2*6)	394	12	CAGATCTTGCCTCTCCAAGTGCCTCTCTCAGAGCAGTGGAGCACGGATTCAGCTGCTGCACTTGCCATGGCTCTCCCCGCCTCTCCTCTCTCC[CTCTCTCTCTCT]CCCACCCCCCCTCGAGCGCATTGCCTTGGGGCGGCGTTGTGCTGAGTGGATGAGG	CAGATCTTGCCTCTCCAAGTG	59.997	0.52381	CCTCATCCACTCAGCACAAC	59.261	0.55	160
isoform_107261_12349_3	CTCTCTCTCTCT	CT(2*6)	394	12	CACTTGCCATGGCTCTCCCCGCCTCTCCTCTCTCC[CTCTCTCTCTCT]CCCACCCCCCCTCGAGCGCATTGCCTTGGGGCGGCGTTGTGCTGAGTGGATGAGGCCCTTCGTTGTTCAGAAGGAGGCTTGGCGATAGATGCGCAACAGGCATATAC	CACTTGCCATGGCTCTCC	60.363	0.611111	GTATATGCCTGTTGCGCATCTAT	60.383	0.434783	154
isoform_107261_12349_4	CTCTCTCTCTCT	CT(2*6)	394	12	GCACTTGCCATGGCTCTCCCCGCCTCTCCTCTCTCC[CTCTCTCTCTCT]CCCACCCCCCCTCGAGCGCATTGCCTTGGGGCGGCGTTGTGCTGAGTGGATGAGGCCCTTCGTTGTTCAGAAGGAGGCTTGGCGATAGATGCGCAACAGGCATATAC	GCACTTGCCATGGCTCTC	60.53	0.611111	GTATATGCCTGTTGCGCATCTAT	60.383	0.434783	155
isoform_107261_12349_5	CTCTCTCTCTCT	CT(2*6)	394	12	CTCTCTCAGAGCAGTGGAGCACGGATTCAGCTGCTGCACTTGCCATGGCTCTCCCCGCCTCTCCTCTCTCC[CTCTCTCTCTCT]CCCACCCCCCCTCGAGCGCATTGCCTTGGGGCGGCGTTGTGCTGAGTGGATGAGGCCCTTCGTTGTTCAGAAGGAG	CTCTCTCAGAGCAGTGGAGCAC	61.844	0.590909	CTCCTTCTGAACAACGAAGGG	61.154	0.52381	159
isoform_107420_12352_1	CCTCCTCCTCCTCCT	CCT(3*5)	204	15	CTTTAAGCACCCACCAGCTTATTTCTCTTGCAAGGCCGCTACTCTACTGCTCCTC[CCTCCTCCTCCTCCT]CCCCTCCCTCCACCTCCCCTCAGGTCTGCGCTTCAAAGCAAGCATCTCATTCTCACAGTATAACCTGCCC	CTTTAAGCACCCACCAGCTTATT	60.841	0.434783	GGGCAGGTTATACTGTGAGAATG	59.906	0.478261	140
isoform_107420_12352_2	CCTCCTCCTCCTCCT	CCT(3*5)	204	15	TTAAGCACCCACCAGCTTATTTCTCTTGCAAGGCCGCTACTCTACTGCTCCTC[CCTCCTCCTCCTCCT]CCCCTCCCTCCACCTCCCCTCAGGTCTGCGCTTCAAAGCAAGCATCTCATTCTCACAGTATAACCTGCCC	TTAAGCACCCACCAGCTTATTT	60.023	0.409091	GGGCAGGTTATACTGTGAGAATG	59.906	0.478261	138
isoform_107420_12352_3	CCTCCTCCTCCTCCT	CCT(3*5)	204	15	TTTAAGCACCCACCAGCTTATTTCTCTTGCAAGGCCGCTACTCTACTGCTCCTC[CCTCCTCCTCCTCCT]CCCCTCCCTCCACCTCCCCTCAGGTCTGCGCTTCAAAGCAAGCATCTCATTCTCACAGTATAACCTGCCC	TTTAAGCACCCACCAGCTTATT	60.023	0.409091	GGGCAGGTTATACTGTGAGAATG	59.906	0.478261	139
isoform_107420_12352_4	CCTCCTCCTCCTCCT	CCT(3*5)	204	15	TTTAAGCACCCACCAGCTTATTTCTCTTGCAAGGCCGCTACTCTACTGCTCCTC[CCTCCTCCTCCTCCT]CCCCTCCCTCCACCTCCCCTCAGGTCTGCGCTTCAAAGCAAGCATCTCATTCTCACAGTATAACCTGCCC	TTTAAGCACCCACCAGCTTATTT	61.155	0.391304	GGGCAGGTTATACTGTGAGAATG	59.906	0.478261	139
isoform_107420_12352_5	CCTCCTCCTCCTCCT	CCT(3*5)	204	15	TAAGCACCCACCAGCTTATTTCTCTTGCAAGGCCGCTACTCTACTGCTCCTC[CCTCCTCCTCCTCCT]CCCCTCCCTCCACCTCCCCTCAGGTCTGCGCTTCAAAGCAAGCATCTCATTCTCACAGTATAACCTGCCC	TAAGCACCCACCAGCTTATTTCT	61.305	0.434783	GGGCAGGTTATACTGTGAGAATG	59.906	0.478261	137
isoform_107675_12364_1	TCTTCTTCTTCTTCT	TCT(3*5)	214	15	ACTTGTGTGCCTCTAAAACGAAGGCTGTTCCTCTCATTTTTCCTTC[TCTTCTTCTTCTTCT]TTGGAAGCCTGCTGATATCATCAAATTGTGGAGTGGGCAGGTGCTTCGAGTCCATCACTCTAC	ACTTGTGTGCCTCTAAAACGAAG	59.868	0.434783	GTAGAGTGATGGACTCGAAGCAC	60.324	0.521739	124
isoform_107675_12364_2	TCTTCTTCTTCTTCT	TCT(3*5)	214	15	ACTTGTGTGCCTCTAAAACGAAGGCTGTTCCTCTCATTTTTCCTTC[TCTTCTTCTTCTTCT]TTGGAAGCCTGCTGATATCATCAAATTGTGGAGTGGGCAGGTGCTTCGAGTCCATCACTCTACAC	ACTTGTGTGCCTCTAAAACGAAG	59.868	0.434783	GTGTAGAGTGATGGACTCGAAGC	60.324	0.521739	126
isoform_107675_12364_3	TCTTCTTCTTCTTCT	TCT(3*5)	214	15	AACTTGTGTGCCTCTAAAACGAAGGCTGTTCCTCTCATTTTTCCTTC[TCTTCTTCTTCTTCT]TTGGAAGCCTGCTGATATCATCAAATTGTGGAGTGGGCAGGTGCTTCGAGTCCATCACTCTAC	AACTTGTGTGCCTCTAAAACGAA	60.208	0.391304	GTAGAGTGATGGACTCGAAGCAC	60.324	0.521739	125
isoform_107675_12364_4	TCTTCTTCTTCTTCT	TCT(3*5)	214	15	AACTTGTGTGCCTCTAAAACGAAGGCTGTTCCTCTCATTTTTCCTTC[TCTTCTTCTTCTTCT]TTGGAAGCCTGCTGATATCATCAAATTGTGGAGTGGGCAGGTGCTTCGAGTCCATCACTCTACAC	AACTTGTGTGCCTCTAAAACGAA	60.208	0.391304	GTGTAGAGTGATGGACTCGAAGC	60.324	0.521739	127
isoform_107675_12364_5	TCTTCTTCTTCTTCT	TCT(3*5)	214	15	ACCTGAACTTGTGTGCCTCTAAAACGAAGGCTGTTCCTCTCATTTTTCCTTC[TCTTCTTCTTCTTCT]TTGGAAGCCTGCTGATATCATCAAATTGTGGAGTGGGCAGGTGCTTCGAGTCCATCACTCTAC	ACCTGAACTTGTGTGCCTCTAAA	60.212	0.434783	GTAGAGTGATGGACTCGAAGCAC	60.324	0.521739	130
isoform_10777_2121_1	CTCTCTCTCTCTCTCTCTCTCTCT	CT(2*12)	228	24	TTCCTGAATTCTCTCACCAGTGTCAACATCTTGGGCAAGGCCACAGGACTTGAAGGTGCAAGGCCTCCCC[CTCTCTCTCTCTCTCTCTCTCTCT]CAATCACAATATACCATCTGCATTCATAGTTCAATG	TTCCTGAATTCTCTCACCAGTGT	60.16	0.434783	CATTGAACTATGAATGCAGATGG	59.488	0.391304	130
isoform_10777_2121_2	CTCTCTCTCTCTCTCTCTCTCTCT	CT(2*12)	228	24	CTCTTCCTGAATTCTCTCACCAGTGTCAACATCTTGGGCAAGGCCACAGGACTTGAAGGTGCAAGGCCTCCCC[CTCTCTCTCTCTCTCTCTCTCTCT]CAATCACAATATACCATCTGCATTCATAGTTCAATG	CTCTTCCTGAATTCTCTCACCAG	59.511	0.478261	CATTGAACTATGAATGCAGATGG	59.488	0.391304	133
isoform_10777_2121_3	CTCTCTCTCTCTCTCTCTCTCTCT	CT(2*12)	228	24	CTGAATTCTCTCACCAGTGTCAACATCTTGGGCAAGGCCACAGGACTTGAAGGTGCAAGGCCTCCCC[CTCTCTCTCTCTCTCTCTCTCTCT]CAATCACAATATACCATCTGCATTCATAGTTCAATG	CTGAATTCTCTCACCAGTGTCAA	59.386	0.434783	CATTGAACTATGAATGCAGATGG	59.488	0.391304	127
isoform_10777_2121_4	CTCTCTCTCTCTCTCTCTCTCTCT	CT(2*12)	228	24	TCTTCCTGAATTCTCTCACCAGTGTCAACATCTTGGGCAAGGCCACAGGACTTGAAGGTGCAAGGCCTCCCC[CTCTCTCTCTCTCTCTCTCTCTCT]CAATCACAATATACCATCTGCATTCATAGTTCAATG	TCTTCCTGAATTCTCTCACCAGT	59.379	0.434783	CATTGAACTATGAATGCAGATGG	59.488	0.391304	132
isoform_10777_2121_5	CTCTCTCTCTCTCTCTCTCTCTCT	CT(2*12)	228	24	TCCTGAATTCTCTCACCAGTGTCAACATCTTGGGCAAGGCCACAGGACTTGAAGGTGCAAGGCCTCCCC[CTCTCTCTCTCTCTCTCTCTCTCT]CAATCACAATATACCATCTGCATTCATAGTTCAATG	TCCTGAATTCTCTCACCAGTGTC	60.675	0.478261	CATTGAACTATGAATGCAGATGG	59.488	0.391304	129
isoform_107880_12373_1	AGAGAGAGAGAGAG	AG(2*7)	432	14	CTCCTCCTAATAACCTGCACAC[AGAGAGAGAGAGAG]CCTACTACCTACGGTGCTGCTCCTAGTGAGCTTGTAAACGTGTGCTCGCAAATATCCATTTACGCACATATATTTTTATTGGCTGGGGGCCCTGGATTATATTTGCCTCTCT	CTCCTCCTAATAACCTGCACACA	60.539	0.478261	AGAGAGGCAAATATAATCCAGGG	59.847	0.434783	148
isoform_107880_12373_4	AGAGAGAGAGAGAG	AG(2*7)	432	14	CCTCCTCCTAATAACCTGCACAC[AGAGAGAGAGAGAG]CCTACTACCTACGGTGCTGCTCCTAGTGAGCTTGTAAACGTGTGCTCGCAAATATCCATTTACGCACATATATTTTTATTGGCTGGGGGCCCTGGATTATATTTGCCTCTCT	CCTCCTCCTAATAACCTGCACAC	61.222	0.521739	AGAGAGGCAAATATAATCCAGGG	59.847	0.434783	149
isoform_10826_2142_1	GAGAGAGAGAGAGAGAGAGAGAGAGAGAGAGAGAGAGAGAGAGAGAGAGA	GA(2*25)	313	50	ACATTACAGGAAGGCAAAACGTATGCTCGTGTGCGCGACTACATTGACATAGCCGCCCCC[GAGAGAGAGAGAGAGAGAGAGAGAGAGAGAGAGAGAGAGAGAGAGAGAGA]GCTCCCTCTTTACGTGTGCCGCGCGCCTTTTCTCGTCCTTTCAACCAG	ACATTACAGGAAGGCAAAACGTA	59.946	0.391304	CTGGTTGAAAGGACGAGAAAAG	60.267	0.454545	158
isoform_10826_2142_2	GAGAGAGAGAGAGAGAGAGAGAGAGAGAGAGAGAGAGAGAGAGAGAGAGA	GA(2*25)	313	50	ATTACAGGAAGGCAAAACGTATGCTCGTGTGCGCGACTACATTGACATAGCCGCCCCC[GAGAGAGAGAGAGAGAGAGAGAGAGAGAGAGAGAGAGAGAGAGAGAGAGA]GCTCCCTCTTTACGTGTGCCGCGCGCCTTTTCTCGTCCTTTCAACCAG	ATTACAGGAAGGCAAAACGTATG	59.465	0.391304	CTGGTTGAAAGGACGAGAAAAG	60.267	0.454545	156
isoform_10826_2142_3	GAGAGAGAGAGAGAGAGAGAGAGAGAGAGAGAGAGAGAGAGAGAGAGAGA	GA(2*25)	313	50	ATACATTACAGGAAGGCAAAACGTATGCTCGTGTGCGCGACTACATTGACATAGCCGCCCCC[GAGAGAGAGAGAGAGAGAGAGAGAGAGAGAGAGAGAGAGAGAGAGAGAGA]GCTCCCTCTTTACGTGTGCCGCGCGCCTTTTCTCGTCCTTTCAACCAG	ATACATTACAGGAAGGCAAAACG	59.465	0.391304	CTGGTTGAAAGGACGAGAAAAG	60.267	0.454545	160
isoform_108359_12407_5	AGAGAGAGAGAGAGAGAGAGAGAG	AG(2*12)	354	24	GCCTCCACTAGGTGAGAAGTTTACA[AGAGAGAGAGAGAGAGAGAGAGAG]TACGTTTCAGGAGGCCTAGCATTGTCCGAACAGGAATGTTGGGGTCCATTTTTGGCGTGCCTAGCCAAGTGGCCTATGCAATGTCTCT	GCCTCCACTAGGTGAGAAGTTTA	58.97	0.478261	AGAGACATTGCATAGGCCACTT	60.158	0.454545	137
isoform_10923_2158_1	CACACACACACA	CA(2*6)	443	12	TACACTGGAGGATGTGCTCATTTGCATGGGCAAGAAACAGTTGGTTGCCTTGATCACCCCTGCCAACAATCAAGCTGAAACACGTGCAGCTGGT[CACACACACACA]GCCAATATGCCAAGTGAAGACAAT	TACACTGGAGGATGTGCTCATTT	60.918	0.434783	ATTGTCTTCACTTGGCATATTGG	60.25	0.391304	130
isoform_10923_2158_2	CACACACACACA	CA(2*6)	443	12	AGAAACAGTTGGTTGCCTTGATCACCCCTGCCAACAATCAAGCTGAAACACGTGCAGCTGGT[CACACACACACA]GCCAATATGCCAAGTGAAGACAAT	AGAAACAGTTGGTTGCCTTGAT	60.04	0.409091	ATTGTCTTCACTTGGCATATTGG	60.25	0.391304	98
isoform_10923_2158_4	CACACACACACA	CA(2*6)	443	12	GACAGACCCAGAAGAGCTTGATGTGGACGCTACACTGGAGGATGTGCTCATTTGCATGGGCAAGAAACAGTTGGTTGCCTTGATCACCCCTGCCAACAATCAAGCTGAAACACGTGCAGCTGGT[CACACACACACA]GCCAATATGCCAAGTGAAGACAAT	GACAGACCCAGAAGAGCTTGAT	59.885	0.5	ATTGTCTTCACTTGGCATATTGG	60.25	0.391304	160
isoform_10923_2158_5	CACACACACACA	CA(2*6)	443	12	AAGAAACAGTTGGTTGCCTTGATCACCCCTGCCAACAATCAAGCTGAAACACGTGCAGCTGGT[CACACACACACA]GCCAATATGCCAAGTGAAGACAAT	AAGAAACAGTTGGTTGCCTTGAT	61.24	0.391304	ATTGTCTTCACTTGGCATATTGG	60.25	0.391304	99
isoform_109375_12449_1	CTCTCTCTCTCT	CT(2*6)	519	12	CTCAATAGCCTCTGCCTTCTGATC[CTCTCTCTCTCT]GCGTGCCTTTTACCTTTTTTGATCGGGCGTTTTCCAGTTTGGCTGTCGAGGACTGTACGTTCTCCCCGTCCATCTAGAGCGCTAAAAAGG	CTCAATAGCCTCTGCCTTCTGAT	61.216	0.478261	CCTTTTTAGCGCTCTAGATGGAC	60.715	0.478261	126
isoform_109375_12449_2	CTCTCTCTCTCT	CT(2*6)	519	12	TCAATAGCCTCTGCCTTCTGATC[CTCTCTCTCTCT]GCGTGCCTTTTACCTTTTTTGATCGGGCGTTTTCCAGTTTGGCTGTCGAGGACTGTACGTTCTCCCCGTCCATCTAGAGCGCTAAAAAGG	TCAATAGCCTCTGCCTTCTGAT	60.36	0.454545	CCTTTTTAGCGCTCTAGATGGAC	60.715	0.478261	125
isoform_109375_12449_3	CTCTCTCTCTCT	CT(2*6)	519	12	CTCAATAGCCTCTGCCTTCTGATC[CTCTCTCTCTCT]GCGTGCCTTTTACCTTTTTTGATCGGGCGTTTTCCAGTTTGGCTGTCGAGGACTGTACGTTCTCCCCGTCCATCTAGAGCGCTAAAAAGG	CTCAATAGCCTCTGCCTTCTGAT	61.216	0.478261	CCTTTTTAGCGCTCTAGATGGA	60.004	0.454545	126
isoform_109375_12449_4	CTCTCTCTCTCT	CT(2*6)	519	12	TCAATAGCCTCTGCCTTCTGATC[CTCTCTCTCTCT]GCGTGCCTTTTACCTTTTTTGATCGGGCGTTTTCCAGTTTGGCTGTCGAGGACTGTACGTTCTCCCCGTCCATCTAGAGCGCTAAAAAGG	TCAATAGCCTCTGCCTTCTGAT	60.36	0.454545	CCTTTTTAGCGCTCTAGATGGA	60.004	0.454545	125
isoform_109375_12449_5	CTCTCTCTCTCT	CT(2*6)	519	12	CTCAATAGCCTCTGCCTTCTGATC[CTCTCTCTCTCT]GCGTGCCTTTTACCTTTTTTGATCGGGCGTTTTCCAGTTTGGCTGTCGAGGACTGTACGTTCTCCCCGTCCATCTAGAGCGCTAAAAAGGGGACGGACGCACGAAGGTAGAGAGAAAA	CTCAATAGCCTCTGCCTTCTGAT	61.216	0.478261	TTTTCTCTCTACCTTCGTGCGT	60.424	0.454545	154
isoform_109376_12450_4	ACACACACACACAC	AC(2*7)	245	14	CAGTTTGGCCAGGAGAAGACGGGAGAGGCGCAACACCACGCCCAGGT[ACACACACACACAC]GTACTCATGTATTGCAGTCTTTCTGTCGTC	CAGTTTGGCCAGGAGAAGAC	59.844	0.55	GACGACAGAAAGACTGCAATACA	59.438	0.434783	91
isoform_109405_12453_1	GCTGGAGCTGGAGCTGGAGCTGGA	GCTGGA(6*4)	329	24	CAGCACAAGAGTGGACTGGAGCTGCTGCTCCTTGCCAGGGATGGGATGCTGCCCCCTGCGCCTGCTCCGTCTGGTGCCTACCCAGCAGGCGTGGTACCTGCTGGT[GCTGGAGCTGGAGCTGGAGCTGGA]TGGGATACTGCTCCTGCTGAACTG	CAGCACAAGAGTGGACTGGA	60.022	0.55	CAGTTCAGCAGGAGCAGTATCC	61.331	0.545455	153
isoform_109405_12453_2	GCTGGAGCTGGAGCTGGAGCTGGA	GCTGGA(6*4)	329	24	CAGCACAAGAGTGGACTGGAGCTGCTGCTCCTTGCCAGGGATGGGATGCTGCCCCCTGCGCCTGCTCCGTCTGGTGCCTACCCAGCAGGCGTGGTACCTGCTGGT[GCTGGAGCTGGAGCTGGAGCTGGA]TGGGATACTGCTCCTGCTGAACTGG	CAGCACAAGAGTGGACTGGA	60.022	0.55	CCAGTTCAGCAGGAGCAGTATC	61.331	0.545455	154
isoform_109405_12453_3	GCTGGAGCTGGAGCTGGAGCTGGA	GCTGGA(6*4)	329	24	CACAAGAGTGGACTGGAGCTGCTGCTCCTTGCCAGGGATGGGATGCTGCCCCCTGCGCCTGCTCCGTCTGGTGCCTACCCAGCAGGCGTGGTACCTGCTGGT[GCTGGAGCTGGAGCTGGAGCTGGA]TGGGATACTGCTCCTGCTGAACTG	CACAAGAGTGGACTGGAGCTG	61.044	0.571429	CAGTTCAGCAGGAGCAGTATCC	61.331	0.545455	150
isoform_109405_12453_4	GCTGGAGCTGGAGCTGGAGCTGGA	GCTGGA(6*4)	329	24	CACAAGAGTGGACTGGAGCTGCTGCTCCTTGCCAGGGATGGGATGCTGCCCCCTGCGCCTGCTCCGTCTGGTGCCTACCCAGCAGGCGTGGTACCTGCTGGT[GCTGGAGCTGGAGCTGGAGCTGGA]TGGGATACTGCTCCTGCTGAACTGG	CACAAGAGTGGACTGGAGCTG	61.044	0.571429	CCAGTTCAGCAGGAGCAGTATC	61.331	0.545455	151
isoform_109405_12453_5	GCTGGAGCTGGAGCTGGAGCTGGA	GCTGGA(6*4)	329	24	CACAAGAGTGGACTGGAGCTGCTGCTCCTTGCCAGGGATGGGATGCTGCCCCCTGCGCCTGCTCCGTCTGGTGCCTACCCAGCAGGCGTGGTACCTGCTGGT[GCTGGAGCTGGAGCTGGAGCTGGA]TGGGATACTGCTCCTGCTGAACTGGA	CACAAGAGTGGACTGGAGCTG	61.044	0.571429	TCCAGTTCAGCAGGAGCAGTAT	61.331	0.5	152
isoform_10947_2159_1	CATCATCATCATCAT	CAT(3*5)	1118	15	TAGCAGCTCAAGGGACTCTAATGGAAGCTCTCAAGATTCTTACTTCCACTCAAATCTCACTCAAAACAAAGCATCCTCCTTTAATAATACCTCC[CATCATCATCATCAT]TCTCACAGCAAACCCATGAGTTTTCAATATCCCTTGGAA	TAGCAGCTCAAGGGACTCTAATG	60.048	0.478261	TTCCAAGGGATATTGAAAACTCA	59.83	0.347826	148
isoform_10947_2159_2	CATCATCATCATCAT	CAT(3*5)	1118	15	TCAAAACAAAGCATCCTCCTTTAATAATACCTCC[CATCATCATCATCAT]TCTCACAGCAAACCCATGAGTTTTCAATATCCCTTGGAA	TCAAAACAAAGCATCCTCCTTTA	60.115	0.347826	TTCCAAGGGATATTGAAAACTCA	59.83	0.347826	88
isoform_10947_2159_3	CATCATCATCATCAT	CAT(3*5)	1118	15	TAGCAGCTCAAGGGACTCTAATGGAAGCTCTCAAGATTCTTACTTCCACTCAAATCTCACTCAAAACAAAGCATCCTCCTTTAATAATACCTCC[CATCATCATCATCAT]TCTCACAGCAAACCCATGAGTTTTCAATATCCCTTG	TAGCAGCTCAAGGGACTCTAATG	60.048	0.478261	CAAGGGATATTGAAAACTCATGG	59.724	0.391304	145
isoform_10947_2159_4	CATCATCATCATCAT	CAT(3*5)	1118	15	CAGTAGCAGCTCAAGGGACTCTAATGGAAGCTCTCAAGATTCTTACTTCCACTCAAATCTCACTCAAAACAAAGCATCCTCCTTTAATAATACCTCC[CATCATCATCATCAT]TCTCACAGCAAACCCATGAGTTTTCAATATCCCTTGGAA	CAGTAGCAGCTCAAGGGACTCTA	60.212	0.521739	TTCCAAGGGATATTGAAAACTCA	59.83	0.347826	151
isoform_10947_2159_5	CATCATCATCATCAT	CAT(3*5)	1118	15	TCAAAACAAAGCATCCTCCTTTAATAATACCTCC[CATCATCATCATCAT]TCTCACAGCAAACCCATGAGTTTTCAATATCCCTTG	TCAAAACAAAGCATCCTCCTTTA	60.115	0.347826	CAAGGGATATTGAAAACTCATGG	59.724	0.391304	85
isoform_109635_12462_1	CATCATCATCATCAT	CAT(3*5)	208	15	CTTCTCAAGATGGCTATGTCAGCCTCGCAAGCCTTCTTATCAACAGCCCCTCATCGTCCCCAACCTCAGATCAGAGCAGCCTTCAC[CATCATCATCATCAT]TTTGATCATCTCTTCAATTTCGTAGCG	CTTCTCAAGATGGCTATGTCAGC	60.407	0.478261	CGCTACGAAATTGAAGAGATGAT	59.771	0.391304	128
isoform_109635_12462_2	CATCATCATCATCAT	CAT(3*5)	208	15	GCTTCTCAAGATGGCTATGTCAGCCTCGCAAGCCTTCTTATCAACAGCCCCTCATCGTCCCCAACCTCAGATCAGAGCAGCCTTCAC[CATCATCATCATCAT]TTTGATCATCTCTTCAATTTCGTAGCG	GCTTCTCAAGATGGCTATGTCAG	60.407	0.478261	CGCTACGAAATTGAAGAGATGAT	59.771	0.391304	129
isoform_109635_12462_3	CATCATCATCATCAT	CAT(3*5)	208	15	CTGCTTCTCAAGATGGCTATGTCAGCCTCGCAAGCCTTCTTATCAACAGCCCCTCATCGTCCCCAACCTCAGATCAGAGCAGCCTTCAC[CATCATCATCATCAT]TTTGATCATCTCTTCAATTTCGTAGCG	CTGCTTCTCAAGATGGCTATGTC	60.407	0.478261	CGCTACGAAATTGAAGAGATGAT	59.771	0.391304	131
isoform_109635_12462_4	CATCATCATCATCAT	CAT(3*5)	208	15	CTCTACTGCTTCTCAAGATGGCTATGTCAGCCTCGCAAGCCTTCTTATCAACAGCCCCTCATCGTCCCCAACCTCAGATCAGAGCAGCCTTCAC[CATCATCATCATCAT]TTTGATCATCTCTTCAATTTCGTAGCG	CTCTACTGCTTCTCAAGATGGCT	59.336	0.478261	CGCTACGAAATTGAAGAGATGAT	59.771	0.391304	136
isoform_109635_12462_5	CATCATCATCATCAT	CAT(3*5)	208	15	ACTCTACTGCTTCTCAAGATGGCTATGTCAGCCTCGCAAGCCTTCTTATCAACAGCCCCTCATCGTCCCCAACCTCAGATCAGAGCAGCCTTCAC[CATCATCATCATCAT]TTTGATCATCTCTTCAATTTCGTAGCG	ACTCTACTGCTTCTCAAGATGGC	59.206	0.478261	CGCTACGAAATTGAAGAGATGAT	59.771	0.391304	137
isoform_109715_12471_1	TCTCTCTCTCTC	TC(2*6)	384	12	ATAAATGTGCCTCCACAGTCATCTCAACAACGACTAAAAAAAATCTTGA[TCTCTCTCTCTC]GTCCTTTCTTTAACTGTCGGCTAGCAGGTA	ATAAATGTGCCTCCACAGTCATC	60.263	0.434783	TACCTGCTAGCCGACAGTTAAAG	59.979	0.478261	91
isoform_109715_12471_2	TCTCTCTCTCTC	TC(2*6)	384	12	ATAAATGTGCCTCCACAGTCATCTCAACAACGACTAAAAAAAATCTTGA[TCTCTCTCTCTC]GTCCTTTCTTTAACTGTCGGCTAGCAGGTAG	ATAAATGTGCCTCCACAGTCATC	60.263	0.434783	CTACCTGCTAGCCGACAGTTAAA	59.979	0.478261	92
isoform_109715_12471_4	TCTCTCTCTCTC	TC(2*6)	384	12	ATAAATGTGCCTCCACAGTCATCTCAACAACGACTAAAAAAAATCTTGA[TCTCTCTCTCTC]GTCCTTTCTTTAACTGTCGGCTAGCAG	ATAAATGTGCCTCCACAGTCATC	60.263	0.434783	CTGCTAGCCGACAGTTAAAGAAA	60.082	0.434783	88
isoform_109746_12473_1	CTCTCTCTCTCTCTCTCT	CT(2*9)	297	18	GGTAGAAGGAGCAGGGAGATAGAGCTGCATCGCAGAGGAGAGGGGAAAAGGTGGGCAAGGCAATC[CTCTCTCTCTCTCTCTCT]GTCTCACAGACCTGCAGAGGCAGAAGCAGGGGCGGACCTGCTAGCAAACCACGTTCTCCAAG	GGTAGAAGGAGCAGGGAGATAGA	60.229	0.521739	CTTGGAGAACGTGGTTTGCTA	60.29	0.47619	145
isoform_109746_12473_2	CTCTCTCTCTCTCTCTCT	CT(2*9)	297	18	GGTAGAAGGAGCAGGGAGATAGAGCTGCATCGCAGAGGAGAGGGGAAAAGGTGGGCAAGGCAATC[CTCTCTCTCTCTCTCTCT]GTCTCACAGACCTGCAGAGGCAGAAGCAGGGGCGGACCTGCTAGCAAACCACGTTCTCCAAGGCTGCTAGGAG	GGTAGAAGGAGCAGGGAGATAGA	60.229	0.521739	CTCCTAGCAGCCTTGGAGAAC	60.522	0.571429	156
isoform_109746_12473_3	CTCTCTCTCTCTCTCTCT	CT(2*9)	297	18	TAGAAGGAGCAGGGAGATAGAGCTGCATCGCAGAGGAGAGGGGAAAAGGTGGGCAAGGCAATC[CTCTCTCTCTCTCTCTCT]GTCTCACAGACCTGCAGAGGCAGAAGCAGGGGCGGACCTGCTAGCAAACCACGTTCTCCAAG	TAGAAGGAGCAGGGAGATAGAGC	60.479	0.521739	CTTGGAGAACGTGGTTTGCTA	60.29	0.47619	143
isoform_109746_12473_4	CTCTCTCTCTCTCTCTCT	CT(2*9)	297	18	TAGAAGGAGCAGGGAGATAGAGCTGCATCGCAGAGGAGAGGGGAAAAGGTGGGCAAGGCAATC[CTCTCTCTCTCTCTCTCT]GTCTCACAGACCTGCAGAGGCAGAAGCAGGGGCGGACCTGCTAGCAAACCACGTTCTCCAAGGCTGCTAGGAG	TAGAAGGAGCAGGGAGATAGAGC	60.479	0.521739	CTCCTAGCAGCCTTGGAGAAC	60.522	0.571429	154
isoform_109746_12473_5	CTCTCTCTCTCTCTCTCT	CT(2*9)	297	18	GGTAGAAGGAGCAGGGAGATAGAGCTGCATCGCAGAGGAGAGGGGAAAAGGTGGGCAAGGCAATC[CTCTCTCTCTCTCTCTCT]GTCTCACAGACCTGCAGAGGCAGAAGCAGGGGCGGACCTGCTAGCAAACCACGTT	GGTAGAAGGAGCAGGGAGATAGA	60.229	0.521739	AACGTGGTTTGCTAGCAGGT	59.803	0.5	138
isoform_109780_12474_1	CTCTCTCTCTCTCTCTCTCTCTCTCTCTCTCT	CT(2*16)	172	32	TACTCTACTGCAGAGGGTCAGTGGCTCTCGCC[CTCTCTCTCTCTCTCTCTCTCTCTCTCTCTCT]CCCTCCTCACTTTGCCCGCCTGCCAAGAACTTGATGCCGGGAAGAGCAGGAGGAATTGTCCTTTGAAGTGCTTCAACAGTGTATTTGGCTA	TACTCTACTGCAGAGGGTCAGTG	58.688	0.521739	TAGCCAAATACACTGTTGAAGCA	59.829	0.391304	155
isoform_109780_12474_2	CTCTCTCTCTCTCTCTCTCTCTCTCTCTCTCT	CT(2*16)	172	32	GATGGCTCTGGCGATACTCTACTGCAGAGGGTCAGTGGCTCTCGCC[CTCTCTCTCTCTCTCTCTCTCTCTCTCTCTCT]CCCTCCTCACTTTGCCCGCCTGCCAAGAACTTGATGCCGGGAAGAGCAGGAGGAATTGTCCTTTGAAGTGCTTCA	GATGGCTCTGGCGATACTCTACT	61.121	0.521739	TGAAGCACTTCAAAGGACAATTC	60.637	0.391304	153
isoform_109780_12474_3	CTCTCTCTCTCTCTCTCTCTCTCTCTCTCTCT	CT(2*16)	172	32	GATGGCTCTGGCGATACTCTACTGCAGAGGGTCAGTGGCTCTCGCC[CTCTCTCTCTCTCTCTCTCTCTCTCTCTCTCT]CCCTCCTCACTTTGCCCGCCTGCCAAGAACTTGATGCCGGGAAGAGCAGGAGGAATTGTCCTTTGAAGTGCTTCA	GATGGCTCTGGCGATACTCTAC	60.257	0.545455	TGAAGCACTTCAAAGGACAATTC	60.637	0.391304	153
isoform_109780_12474_4	CTCTCTCTCTCTCTCTCTCTCTCTCTCTCTCT	CT(2*16)	172	32	TACTCTACTGCAGAGGGTCAGTGGCTCTCGCC[CTCTCTCTCTCTCTCTCTCTCTCTCTCTCTCT]CCCTCCTCACTTTGCCCGCCTGCCAAGAACTTGATGCCGGGAAGAGCAGGAGGAATTGTCCTTTGAAGTGCTTCAACAGTGTATTTGGCT	TACTCTACTGCAGAGGGTCAGTG	58.688	0.521739	AGCCAAATACACTGTTGAAGCAC	60.586	0.434783	154
isoform_109780_12474_5	CTCTCTCTCTCTCTCTCTCTCTCTCTCTCTCT	CT(2*16)	172	32	TACTCTACTGCAGAGGGTCAGTGGCTCTCGCC[CTCTCTCTCTCTCTCTCTCTCTCTCTCTCTCT]CCCTCCTCACTTTGCCCGCCTGCCAAGAACTTGATGCCGGGAAGAGCAGGAGGAATTGTCCTTTGAAGTGCTTCA	TACTCTACTGCAGAGGGTCAGTG	58.688	0.521739	TGAAGCACTTCAAAGGACAATTC	60.637	0.391304	139
isoform_109805_12477_3	CTCTCTCTCTCTCTCTCTCTCTCTCTCTCT	CT(2*15)	239	30	ATGCTTGCTACAGAAGAGACGACCACGAAGGCGACGTTGGAGCTTGTTCGGCTCGAGACGGGGGGTGTTCTGTTGCGCAC[CTCTCTCTCTCTCTCTCTCTCTCTCTCTCT]TTGCTATGGCTTCAGCTGCGGATCTGCGGCCCTCTTGATGGGGTTT	ATGCTTGCTACAGAAGAGACGAC	60.096	0.478261	AAACCCCATCAAGAGGGC	59.862	0.555556	156
isoform_109805_12477_5	CTCTCTCTCTCTCTCTCTCTCTCTCTCTCT	CT(2*15)	239	30	ATGCTTGCTACAGAAGAGACGACCACGAAGGCGACGTTGGAGCTTGTTCGGCTCGAGACGGGGGGTGTTCTGTTGCGCAC[CTCTCTCTCTCTCTCTCTCTCTCTCTCTCT]TTGCTATGGCTTCAGCTGCGGATCTGCGGCCCTCTTGATGGGGTTTT	ATGCTTGCTACAGAAGAGACGAC	60.096	0.478261	AAAACCCCATCAAGAGGGC	61.207	0.526316	157
isoform_109975_12488_1	ACGCACGCACGCACGCACGCACGC	ACGC(4*6)	206	24	TCTCAGACTCTCTCAGTTTCGCTT[ACGCACGCACGCACGCACGCACGC]GTCTGCGCACAATGTCGAGAAGGTGCAGTAGGAGTACAGCAG	TCTCAGACTCTCTCAGTTTCGCT	59.952	0.478261	CTGCTGTACTCCTACTGCACCTT	60.013	0.521739	90
isoform_109975_12488_2	ACGCACGCACGCACGCACGCACGC	ACGC(4*6)	206	24	CTCTCAGACTCTCTCAGTTTCGCTT[ACGCACGCACGCACGCACGCACGC]GTCTGCGCACAATGTCGAGAAGGTGCAGTAGGAGTACAGCAG	CTCTCAGACTCTCTCAGTTTCGC	59.952	0.521739	CTGCTGTACTCCTACTGCACCTT	60.013	0.521739	91
isoform_109975_12488_3	ACGCACGCACGCACGCACGCACGC	ACGC(4*6)	206	24	TCTCAGACTCTCTCAGTTTCGCTT[ACGCACGCACGCACGCACGCACGC]GTCTGCGCACAATGTCGAGAAGGTGCAGTAGGAGTA	TCTCAGACTCTCTCAGTTTCGCT	59.952	0.478261	TACTCCTACTGCACCTTCTCGAC	59.957	0.521739	84
isoform_109975_12488_4	ACGCACGCACGCACGCACGCACGC	ACGC(4*6)	206	24	CTCTCAGACTCTCTCAGTTTCGCTT[ACGCACGCACGCACGCACGCACGC]GTCTGCGCACAATGTCGAGAAGGTGCAGTAGGAGTA	CTCTCAGACTCTCTCAGTTTCGC	59.952	0.521739	TACTCCTACTGCACCTTCTCGAC	59.957	0.521739	85
isoform_109975_12488_5	ACGCACGCACGCACGCACGCACGC	ACGC(4*6)	206	24	CTCTCAGACTCTCTCAGTTTCGCTT[ACGCACGCACGCACGCACGCACGC]GTCTGCGCACAATGTCGAGAAGGTGCAGTAGGAGTACAGCAGTGAAGCAGGGAAAGGCAGAGCGTCCACTGCCTCAGCTAGCTACTTA	CTCTCAGACTCTCTCAGTTTCGC	59.952	0.521739	TAAGTAGCTAGCTGAGGCAGTGG	60.228	0.521739	137
isoform_110166_12502_1	GAGAGAGAGAGAGAGAGAGAGAGAGAGAGAGAGAGAGAGAGAGA	GA(2*22)	284	44	TTTATGTTTCTGTCGACCTTCGTGATGGGTCACAGGTTCTTCAAGGTTG[GAGAGAGAGAGAGAGAGAGAGAGAGAGAGAGAGAGAGAGAGAGA]CTTACCACTACAATTTGATGTATTCAATGTTCTCATGTGCATTCCACTCTTGGATCTCAAAG	TTTATGTTTCTGTCGACCTTCGT	60.048	0.391304	CTTTGAGATCCAAGAGTGGAATG	60.116	0.434783	155
isoform_110166_12502_2	GAGAGAGAGAGAGAGAGAGAGAGAGAGAGAGAGAGAGAGAGAGA	GA(2*22)	284	44	CTTTATGTTTCTGTCGACCTTCGTGATGGGTCACAGGTTCTTCAAGGTTG[GAGAGAGAGAGAGAGAGAGAGAGAGAGAGAGAGAGAGAGAGAGA]CTTACCACTACAATTTGATGTATTCAATGTTCTCATGTGCATTCCACTCTTGGATCTCAAAG	CTTTATGTTTCTGTCGACCTTCG	60.169	0.434783	CTTTGAGATCCAAGAGTGGAATG	60.116	0.434783	156
isoform_110166_12502_3	GAGAGAGAGAGAGAGAGAGAGAGAGAGAGAGAGAGAGAGAGAGA	GA(2*22)	284	44	TTTATGTTTCTGTCGACCTTCGTGATGGGTCACAGGTTCTTCAAGGTTG[GAGAGAGAGAGAGAGAGAGAGAGAGAGAGAGAGAGAGAGAGAGA]CTTACCACTACAATTTGATGTATTCAATGTTCTCATGTGCATTCCACTCTTGGATCTCAAAGCAAAG	TTTATGTTTCTGTCGACCTTCGT	60.048	0.391304	CTTTGCTTTGAGATCCAAGAGTG	60.41	0.434783	160
isoform_110166_12502_4	GAGAGAGAGAGAGAGAGAGAGAGAGAGAGAGAGAGAGAGAGAGA	GA(2*22)	284	44	TTTATGTTTCTGTCGACCTTCGTGATGGGTCACAGGTTCTTCAAGGTTG[GAGAGAGAGAGAGAGAGAGAGAGAGAGAGAGAGAGAGAGAGAGA]CTTACCACTACAATTTGATGTATTCAATGTTCTCATGTGCATTCCACTCTT	TTTATGTTTCTGTCGACCTTCGT	60.048	0.391304	AAGAGTGGAATGCACATGAGAAC	60.552	0.434783	144
isoform_110166_12502_5	GAGAGAGAGAGAGAGAGAGAGAGAGAGAGAGAGAGAGAGAGAGA	GA(2*22)	284	44	CTTTATGTTTCTGTCGACCTTCGTGATGGGTCACAGGTTCTTCAAGGTTG[GAGAGAGAGAGAGAGAGAGAGAGAGAGAGAGAGAGAGAGAGAGA]CTTACCACTACAATTTGATGTATTCAATGTTCTCATGTGCATTCCACTCTT	CTTTATGTTTCTGTCGACCTTCG	60.169	0.434783	AAGAGTGGAATGCACATGAGAAC	60.552	0.434783	145
isoform_110208_12509_1	TCTCTCTCTCTCTCTCTC	TC(2*9)	169	18	GCTCGCTCTTTTCTCACTTCTCTTTCCGCAAACGGAGTCCTCCGAGTTT[TCTCTCTCTCTCTCTCTC]TAGAGTCCTCAAGGCTCACAGTACAGCGAGCATGCACATGCACACAGAGTACTTTCGCAACAG	GCTCGCTCTTTTCTCACTTCTCT	60.793	0.478261	CTGTTGCGAAAGTACTCTGTGTG	60.024	0.478261	130
isoform_110208_12509_2	TCTCTCTCTCTCTCTCTC	TC(2*9)	169	18	CGCTCTTTTCTCACTTCTCTTTCCGCAAACGGAGTCCTCCGAGTTT[TCTCTCTCTCTCTCTCTC]TAGAGTCCTCAAGGCTCACAGTACAGCGAGCATGCACATGCACACAGAGTACTTTCGCAACAG	CGCTCTTTTCTCACTTCTCTTTC	58.97	0.434783	CTGTTGCGAAAGTACTCTGTGTG	60.024	0.478261	127
isoform_110208_12509_3	TCTCTCTCTCTCTCTCTC	TC(2*9)	169	18	TCGCTCTTTTCTCACTTCTCTTTCCGCAAACGGAGTCCTCCGAGTTT[TCTCTCTCTCTCTCTCTC]TAGAGTCCTCAAGGCTCACAGTACAGCGAGCATGCACATGCACACAGAGTACTTTCGCAACAG	TCGCTCTTTTCTCACTTCTCTTT	58.97	0.391304	CTGTTGCGAAAGTACTCTGTGTG	60.024	0.478261	128
isoform_110208_12509_4	TCTCTCTCTCTCTCTCTC	TC(2*9)	169	18	GCTCGCTCTTTTCTCACTTCTCTTTCCGCAAACGGAGTCCTCCGAGTTT[TCTCTCTCTCTCTCTCTC]TAGAGTCCTCAAGGCTCACAGTACAGCGAGCATGCACATGCACACAGAGTACTTTCGCAACAG	GCTCGCTCTTTTCTCACTTCTC	59.913	0.5	CTGTTGCGAAAGTACTCTGTGTG	60.024	0.478261	130
isoform_110208_12509_5	TCTCTCTCTCTCTCTCTC	TC(2*9)	169	18	CTCGCTCTTTTCTCACTTCTCTTTCCGCAAACGGAGTCCTCCGAGTTT[TCTCTCTCTCTCTCTCTC]TAGAGTCCTCAAGGCTCACAGTACAGCGAGCATGCACATGCACACAGAGTACTTTCGCAACAG	CTCGCTCTTTTCTCACTTCTCTTT	59.851	0.416667	CTGTTGCGAAAGTACTCTGTGTG	60.024	0.478261	129
isoform_110327_12514_1	TCTCTCTCTCTCTCTCTCTCTCTCTCTCTCTCTCTCTCTCTCTCTC	TC(2*23)	285	46	GAGAGAAGTAGGAGAAGGGGACCACAAGAGAGGGCAGGCCTGGTTA[TCTCTCTCTCTCTCTCTCTCTCTCTCTCTCTCTCTCTCTCTCTCTC]GGTTGTCCAGGCCAATGGGGAGAAATCGGATGATCTGCAAG	GAGAGAAGTAGGAGAAGGGGACC	60.94	0.565217	CTTGCAGATCATCCGATTTCTC	61.091	0.454545	133
isoform_110327_12514_2	TCTCTCTCTCTCTCTCTCTCTCTCTCTCTCTCTCTCTCTCTCTCTC	TC(2*23)	285	46	AGAAGTAGGAGAAGGGGACCACAAGAGAGGGCAGGCCTGGTTA[TCTCTCTCTCTCTCTCTCTCTCTCTCTCTCTCTCTCTCTCTCTCTC]GGTTGTCCAGGCCAATGGGGAGAAATCGGATGATCTGCAAG	AGAAGTAGGAGAAGGGGACCAC	59.999	0.545455	CTTGCAGATCATCCGATTTCTC	61.091	0.454545	130
isoform_110327_12514_3	TCTCTCTCTCTCTCTCTCTCTCTCTCTCTCTCTCTCTCTCTCTCTC	TC(2*23)	285	46	AGAAGTAGGAGAAGGGGACCACAAGAGAGGGCAGGCCTGGTTA[TCTCTCTCTCTCTCTCTCTCTCTCTCTCTCTCTCTCTCTCTCTCTC]GGTTGTCCAGGCCAATGGGGAGAAATCGGATGATCTGCAA	AGAAGTAGGAGAAGGGGACCAC	59.999	0.545455	TTGCAGATCATCCGATTTCTC	60.17	0.428571	129
isoform_110327_12514_4	TCTCTCTCTCTCTCTCTCTCTCTCTCTCTCTCTCTCTCTCTCTCTC	TC(2*23)	285	46	TGAGAGAAGTAGGAGAAGGGGACCACAAGAGAGGGCAGGCCTGGTTA[TCTCTCTCTCTCTCTCTCTCTCTCTCTCTCTCTCTCTCTCTCTCTC]GGTTGTCCAGGCCAATGGGGAGAAATCGGATGATCTGCAAGC	TGAGAGAAGTAGGAGAAGGGGAC	60.246	0.521739	GCTTGCAGATCATCCGATTT	60.185	0.45	135
isoform_110327_12514_5	TCTCTCTCTCTCTCTCTCTCTCTCTCTCTCTCTCTCTCTCTCTCTC	TC(2*23)	285	46	ATGAGAGAAGTAGGAGAAGGGGACCACAAGAGAGGGCAGGCCTGGTTA[TCTCTCTCTCTCTCTCTCTCTCTCTCTCTCTCTCTCTCTCTCTCTC]GGTTGTCCAGGCCAATGGGGAGAAATCGGATGATCTGCAAGC	ATGAGAGAAGTAGGAGAAGGGGA	59.738	0.478261	GCTTGCAGATCATCCGATTT	60.185	0.45	136
isoform_110371_12517_1	AGAGAGAGAGAGAGAGAGAGAGAGAG	AG(2*13)	398	26	CATTAAAGCTGGACCTTCGACTAGCTCCGCCCACTATTCCGGTAGAGAGGTCAGTTCAAACC[AGAGAGAGAGAGAGAGAGAGAGAGAG]CTATGTGCGCTTCAGGTGTGGTATTTTCTGTTGAGGGAGAA	CATTAAAGCTGGACCTTCGACTA	59.801	0.434783	TTCTCCCTCAACAGAAAATACCA	59.987	0.391304	129
isoform_110371_12517_2	AGAGAGAGAGAGAGAGAGAGAGAGAG	AG(2*13)	398	26	GGTAGAGAGGTCAGTTCAAACC[AGAGAGAGAGAGAGAGAGAGAGAGAG]CTATGTGCGCTTCAGGTGTGGTATTTTCTGTTGAGGGAGAA	GGTAGAGAGGTCAGTTCAAACCA	59.668	0.478261	TTCTCCCTCAACAGAAAATACCA	59.987	0.391304	89
isoform_110371_12517_3	AGAGAGAGAGAGAGAGAGAGAGAGAG	AG(2*13)	398	26	CATTAAAGCTGGACCTTCGACTAGCTCCGCCCACTATTCCGGTAGAGAGGTCAGTTCAAACC[AGAGAGAGAGAGAGAGAGAGAGAGAG]CTATGTGCGCTTCAGGTGTGGTATTTTCTGTTGAGGGAGAAGTGAA	CATTAAAGCTGGACCTTCGACTA	59.801	0.434783	TTCACTTCTCCCTCAACAGAAAA	60.261	0.391304	134
isoform_110371_12517_4	AGAGAGAGAGAGAGAGAGAGAGAGAG	AG(2*13)	398	26	CATTAAAGCTGGACCTTCGACTAGCTCCGCCCACTATTCCGGTAGAGAGGTCAGTTCAAACC[AGAGAGAGAGAGAGAGAGAGAGAGAG]CTATGTGCGCTTCAGGTGTGGTATTTTCTGTTGAGGGAGAAGTGAAA	CATTAAAGCTGGACCTTCGACTA	59.801	0.434783	TTTCACTTCTCCCTCAACAGAAA	60.261	0.391304	135
isoform_110371_12517_5	AGAGAGAGAGAGAGAGAGAGAGAGAG	AG(2*13)	398	26	CATTAAAGCTGGACCTTCGACTAGCTCCGCCCACTATTCCGGTAGAGAGGTCAGTTCAAACC[AGAGAGAGAGAGAGAGAGAGAGAGAG]CTATGTGCGCTTCAGGTGTGGTATTTTCTGTTGAGGGA	CATTAAAGCTGGACCTTCGACTA	59.801	0.434783	TCCCTCAACAGAAAATACCACAC	60.268	0.434783	126
isoform_110418_12520_1	CTCTCTCTCTCTCTCTCTCTCTCTCTCTCTCTCTCTCTCTCTCTCT	CT(2*23)	247	46	CGACGTTGGAGCTCGTTCGGCTCGGGGCGGGGGTGTTCTGTTGCGCAC[CTCTCTCTCTCTCTCTCTCTCTCTCTCTCTCTCTCTCTCTCTCTCT]GTGCTGCGGCTTCAGCTGCGGATCTGCGGCCCTGTTGATGGGGTTTTCTAAATTG	CGACGTTGGAGCTCGTTC	60.557	0.611111	CAATTTAGAAAACCCCATCAACA	60.095	0.347826	149
isoform_110418_12520_2	CTCTCTCTCTCTCTCTCTCTCTCTCTCTCTCTCTCTCTCTCTCTCT	CT(2*23)	247	46	CGACGTTGGAGCTCGTTCGGCTCGGGGCGGGGGTGTTCTGTTGCGCAC[CTCTCTCTCTCTCTCTCTCTCTCTCTCTCTCTCTCTCTCTCTCTCT]GTGCTGCGGCTTCAGCTGCGGATCTGCGGCCCTGTTGATGGGGTTTTCTAAATTGCTACACC	CGACGTTGGAGCTCGTTC	60.557	0.611111	GGTGTAGCAATTTAGAAAACCCC	60.12	0.434783	156
isoform_110418_12520_4	CTCTCTCTCTCTCTCTCTCTCTCTCTCTCTCTCTCTCTCTCTCTCT	CT(2*23)	247	46	CGACGTTGGAGCTCGTTCGGCTCGGGGCGGGGGTGTTCTGTTGCGCAC[CTCTCTCTCTCTCTCTCTCTCTCTCTCTCTCTCTCTCTCTCTCTCT]GTGCTGCGGCTTCAGCTGCGGATCTGCGGCCCTGTTGATGGGGTTTTCTAAAT	CGACGTTGGAGCTCGTTC	60.557	0.611111	ATTTAGAAAACCCCATCAACAGG	60.441	0.391304	147
isoform_110418_12520_5	CTCTCTCTCTCTCTCTCTCTCTCTCTCTCTCTCTCTCTCTCTCTCT	CT(2*23)	247	46	CGACGTTGGAGCTCGTTCGGCTCGGGGCGGGGGTGTTCTGTTGCGCAC[CTCTCTCTCTCTCTCTCTCTCTCTCTCTCTCTCTCTCTCTCTCTCT]GTGCTGCGGCTTCAGCTGCGGATCTGCGGCCCTGTTGATGGGGTTTTCTAAATTGCTACAC	CGACGTTGGAGCTCGTTC	60.557	0.611111	GTGTAGCAATTTAGAAAACCCCA	59.445	0.391304	155
isoform_11042_2164_1	GAGAGAGAGAGAGAGAGAGAGAGAGAGA	GA(2*14)	182	28	ATTCTTGTCAGAGGCATTGTAGGC[GAGAGAGAGAGAGAGAGAGAGAGAGAGA]GGAGAGGGAGATGTGTGTGTTTCCATGGAGACCCCAGCTCAAAGACCTGCGAAGCAATGGAAGCCCATCCGTTCTGGATCAAAACCCTTCTCACACTGTT	ATTCTTGTCAGAGGCATTGTAGG	59.666	0.434783	AACAGTGTGAGAAGGGTTTTGAT	59.068	0.391304	152
isoform_11042_2164_4	GAGAGAGAGAGAGAGAGAGAGAGAGAGA	GA(2*14)	182	28	ATTCTTGTCAGAGGCATTGTAGGC[GAGAGAGAGAGAGAGAGAGAGAGAGAGA]GGAGAGGGAGATGTGTGTGTTTCCATGGAGACCCCAGCTCAAAGACCTGCGAAGCAATGGAAGCCCATCCGTTCTGGATCAAAACCCTTCTCACACTGTTGGT	ATTCTTGTCAGAGGCATTGTAGG	59.666	0.434783	ACCAACAGTGTGAGAAGGGTTT	59.938	0.454545	155
isoform_110597_12531_1	GAGAGAGAGAGAGAGAGAGAGA	GA(2*11)	155	22	ATTTTAACATCGTGGGGAAACTCCC[GAGAGAGAGAGAGAGAGAGAGA]GCGCTTGCAGACTCAGAGATGGGATCGAAAGATCTCAGGCCTGCAGAATTTGATTCAAGCTTGCAACATTCTGAGACCTCTCCAAC	ATTTTAACATCGTGGGGAAACTC	60.448	0.391304	GTTGGAGAGGTCTCAGAATGTTG	60.16	0.478261	133
isoform_110597_12531_2	GAGAGAGAGAGAGAGAGAGAGA	GA(2*11)	155	22	GATTTTAACATCGTGGGGAAACTCCC[GAGAGAGAGAGAGAGAGAGAGA]GCGCTTGCAGACTCAGAGATGGGATCGAAAGATCTCAGGCCTGCAGAATTTGATTCAAGCTTGCAACATTCTGAGACCTCTCCAAC	GATTTTAACATCGTGGGGAAACT	60.448	0.391304	GTTGGAGAGGTCTCAGAATGTTG	60.16	0.478261	134
isoform_110597_12531_3	GAGAGAGAGAGAGAGAGAGAGA	GA(2*11)	155	22	AGATTTTAACATCGTGGGGAAACTCCC[GAGAGAGAGAGAGAGAGAGAGA]GCGCTTGCAGACTCAGAGATGGGATCGAAAGATCTCAGGCCTGCAGAATTTGATTCAAGCTTGCAACATTCTGAGACCTCTCCAAC	AGATTTTAACATCGTGGGGAAAC	60.448	0.391304	GTTGGAGAGGTCTCAGAATGTTG	60.16	0.478261	135
isoform_110597_12531_4	GAGAGAGAGAGAGAGAGAGAGA	GA(2*11)	155	22	ATTTTAACATCGTGGGGAAACTCCC[GAGAGAGAGAGAGAGAGAGAGA]GCGCTTGCAGACTCAGAGATGGGATCGAAAGATCTCAGGCCTGCAGAATTTGATTCAAGCTTGCAAC	ATTTTAACATCGTGGGGAAACTC	60.448	0.391304	GTTGCAAGCTTGAATCAAATTCT	59.791	0.347826	114
isoform_110597_12531_5	GAGAGAGAGAGAGAGAGAGAGA	GA(2*11)	155	22	GATTTTAACATCGTGGGGAAACTCCC[GAGAGAGAGAGAGAGAGAGAGA]GCGCTTGCAGACTCAGAGATGGGATCGAAAGATCTCAGGCCTGCAGAATTTGATTCAAGCTTGCAAC	GATTTTAACATCGTGGGGAAACT	60.448	0.391304	GTTGCAAGCTTGAATCAAATTCT	59.791	0.347826	115
isoform_11060_2165_1	CAGCAGCAGCAGCAG	CAG(3*5)	161	15	GCGTTAGAAGTACTGAGAGCAGCGGTGCCACCTCCAGCGGGGACTCTAT[CAGCAGCAGCAGCAG]TAGCAACATAGAATCCACCTCCTCCT	GCGTTAGAAGTACTGAGAGCAGC	59.88	0.521739	AGGAGGAGGTGGATTCTATGTTG	60.718	0.478261	90
isoform_11060_2165_3	CAGCAGCAGCAGCAG	CAG(3*5)	161	15	TTAGAAGTACTGAGAGCAGCGGTGCCACCTCCAGCGGGGACTCTAT[CAGCAGCAGCAGCAG]TAGCAACATAGAATCCACCTCCTCCT	TTAGAAGTACTGAGAGCAGCGGT	59.746	0.478261	AGGAGGAGGTGGATTCTATGTTG	60.718	0.478261	87
isoform_11060_2165_5	CAGCAGCAGCAGCAG	CAG(3*5)	161	15	GTTAGAAGTACTGAGAGCAGCGGTGCCACCTCCAGCGGGGACTCTAT[CAGCAGCAGCAGCAG]TAGCAACATAGAATCCACCTCCTCCT	GTTAGAAGTACTGAGAGCAGCGG	59.746	0.521739	AGGAGGAGGTGGATTCTATGTTG	60.718	0.478261	88
isoform_110669_12535_1	AAGAAGAAGAAGAAGAAG	AAG(3*6)	207	18	GTGAAGGCTGGGAAGAAGCCAGCCGGGAAAGAAGCCCGCTGCAGAGAAGAAGCCTGCTGGCCGCCAAGGATGGGGCGGTGATA[AAGAAGAAGAAGAAGAAG]GGCCAAGGGGAGGCCCAGAGACTTACAAGATCT	GTGAAGGCTGGGAAGAAGC	59.942	0.578947	AGATCTTGTAAGTCTCTGGGCCT	59.801	0.478261	134
isoform_110669_12535_2	AAGAAGAAGAAGAAGAAG	AAG(3*6)	207	18	CAGAAGAGCGTGAAGGCTGGGAAGAAGCCAGCCGGGAAAGAAGCCCGCTGCAGAGAAGAAGCCTGCTGGCCGCCAAGGATGGGGCGGTGATA[AAGAAGAAGAAGAAGAAG]GGCCAAGGGGAGGCCCAGAGACTTACAAGATCT	CAGAAGAGCGTGAAGGCTG	59.864	0.578947	AGATCTTGTAAGTCTCTGGGCCT	59.801	0.478261	143
isoform_110669_12535_3	AAGAAGAAGAAGAAGAAG	AAG(3*6)	207	18	GTGAAGGCTGGGAAGAAGCCAGCCGGGAAAGAAGCCCGCTGCAGAGAAGAAGCCTGCTGGCCGCCAAGGATGGGGCGGTGATA[AAGAAGAAGAAGAAGAAG]GGCCAAGGGGAGGCCCAGAGACTTACAAGATC	GTGAAGGCTGGGAAGAAGC	59.942	0.578947	GATCTTGTAAGTCTCTGGGCCTC	60.619	0.521739	133
isoform_110669_12535_4	AAGAAGAAGAAGAAGAAG	AAG(3*6)	207	18	CAGAAGAGCGTGAAGGCTGGGAAGAAGCCAGCCGGGAAAGAAGCCCGCTGCAGAGAAGAAGCCTGCTGGCCGCCAAGGATGGGGCGGTGATA[AAGAAGAAGAAGAAGAAG]GGCCAAGGGGAGGCCCAGAGACTTACAAGATC	CAGAAGAGCGTGAAGGCTG	59.864	0.578947	GATCTTGTAAGTCTCTGGGCCTC	60.619	0.521739	142
isoform_110669_12535_5	AAGAAGAAGAAGAAGAAG	AAG(3*6)	207	18	AGAAGAGCGTGAAGGCTGGGAAGAAGCCAGCCGGGAAAGAAGCCCGCTGCAGAGAAGAAGCCTGCTGGCCGCCAAGGATGGGGCGGTGATA[AAGAAGAAGAAGAAGAAG]GGCCAAGGGGAGGCCCAGAGACTTACAAGATCT	AGAAGAGCGTGAAGGCTGG	60.684	0.578947	AGATCTTGTAAGTCTCTGGGCCT	59.801	0.478261	142
isoform_110871_12545_1	TCTCTCTCTCTCTCTCTCTCTCTCTC	TC(2*13)	314	26	AACGTCTGCACTTGTACGTCA[TCTCTCTCTCTCTCTCTCTCTCTCTC]AACCAATTAACCAATTCTTCGTTTCTGCGTGCAGCGTGCTCCTGTGTCTGATGATGCATCACCGGCGTCCTCTTACCCTTTTAGCT	AACGTCTGCACTTGTACGTCAT	59.731	0.454545	AGCTAAAAGGGTAAGAGGACGC	60.268	0.5	133
isoform_110871_12545_2	TCTCTCTCTCTCTCTCTCTCTCTCTC	TC(2*13)	314	26	AACGTCTGCACTTGTACGTCA[TCTCTCTCTCTCTCTCTCTCTCTCTC]AACCAATTAACCAATTCTTCGTTTCTGCGTGCAGCGTGCTCCTGTGTCTGATGATGCATC	AACGTCTGCACTTGTACGTCAT	59.731	0.454545	GATGCATCATCAGACACAGGAG	60.688	0.5	107
isoform_110871_12545_3	TCTCTCTCTCTCTCTCTCTCTCTCTC	TC(2*13)	314	26	AACGTCTGCACTTGTACGTCA[TCTCTCTCTCTCTCTCTCTCTCTCTC]AACCAATTAACCAATTCTTCGTTTCTGCGTGCAGCGTGCTCCTGTGTCTGATGATGCATCACCGGCGTCCTCTTACCCTTTTAGCTC	AACGTCTGCACTTGTACGTCAT	59.731	0.454545	GAGCTAAAAGGGTAAGAGGACGC	61.83	0.521739	134
isoform_110871_12545_4	TCTCTCTCTCTCTCTCTCTCTCTCTC	TC(2*13)	314	26	AAATGCGCCTCCATTCTTAACGGCAACGTCTGCACTTGTACGTCA[TCTCTCTCTCTCTCTCTCTCTCTCTC]AACCAATTAACCAATTCTTCGTTTC	AAATGCGCCTCCATTCTTAAC	60.453	0.428571	GAAACGAAGAATTGGTTAATTGG	58.955	0.347826	96
isoform_110871_12545_5	TCTCTCTCTCTCTCTCTCTCTCTCTC	TC(2*13)	314	26	AACGTCTGCACTTGTACGTCA[TCTCTCTCTCTCTCTCTCTCTCTCTC]AACCAATTAACCAATTCTTCGTTTCTGCGTGCAGCGTGCTCCTGTGTCTGATGATGCATC	AACGTCTGCACTTGTACGTCAT	59.731	0.454545	GATGCATCATCAGACACAGGA	59.653	0.47619	107
isoform_11091_2172_4	AGGAGGAGGAGGAGGAGGAGG	AGG(3*7)	240	21	TGACTCCAACTGCATTAATTTGAAA[AGGAGGAGGAGGAGGAGGAGG]AATCGAATATGCAAGCGCACGAGCGCCATCTGTCTGCTGTGAATGCATCGTTGGTGACTATACTGATTTTGGTGTTGAGCAATGACAT	TGACTCCAACTGCATTAATTTGA	59.639	0.347826	ATGTCATTGCTCAACACCAAAAT	60.646	0.347826	134
isoform_110924_12549_2	AGCAGCAGCAGCAGC	AGC(3*5)	273	15	AGGAAAGAGACTATCGTATCCGCAAGGA[AGCAGCAGCAGCAGC]AAGCAAGGCATAGAGCAAGAGTTTTGGTGTCTCTGGAAAACATT	AGGAAAGAGACTATCGTATCCGC	60.128	0.478261	AATGTTTTCCAGAGACACCAAAA	59.9	0.347826	87
isoform_110924_12549_4	AGCAGCAGCAGCAGC	AGC(3*5)	273	15	GAAAGAGACTATCGTATCCGCAAGGA[AGCAGCAGCAGCAGC]AAGCAAGGCATAGAGCAAGAGTTTTGGTGTCTCTGGAAAACATT	GAAAGAGACTATCGTATCCGCAA	59.771	0.434783	AATGTTTTCCAGAGACACCAAAA	59.9	0.347826	85
isoform_110988_12557_2	GAGAGAGAGAGAGA	GA(2*7)	241	14	TAATCCCAAGAGACCAGTTTTGAGCTCAAGACCTGTTGTGGAAGATGGGGGG[GAGAGAGAGAGAGA]GTGAGAAAGAGAGAGAGATGGCGACACAGAATCGCAGCTGCAGAACGCTGTATCGACTTTACGGGAACAA	TAATCCCAAGAGACCAGTTTTGA	59.987	0.391304	TTGTTCCCGTAAAGTCGATACAG	60.4	0.434783	136
isoform_110988_12557_3	GAGAGAGAGAGAGA	GA(2*7)	241	14	TAATCCCAAGAGACCAGTTTTGAGCTCAAGACCTGTTGTGGAAGATGGGGGG[GAGAGAGAGAGAGA]GTGAGAAAGAGAGAGAGATGGCGACACAGAATCGCAGCTGCAGAACGCTGTATCGACTTTACGGGAACAAG	TAATCCCAAGAGACCAGTTTTGA	59.987	0.391304	CTTGTTCCCGTAAAGTCGATACA	60.4	0.434783	137
isoform_111012_12563_1	TCTCTCTCTCTC	TC(2*6)	194	12	GACGCCTTTACATGTGAGAAACTGATCTAGTGTTTTCAAATGCACTCCGAGCAGTGCCCGATCCCTTTAGATGACTCCAAATACATCAAGTG[TCTCTCTCTCTC]GCCTCTCTCCCCCCAAAACCGGCACGGTTTGACTGTATTTTGGAC	GACGCCTTTACATGTGAGAAACT	59.709	0.434783	GTCCAAAATACAGTCAAACCGTG	60.666	0.434783	149
isoform_111012_12563_2	TCTCTCTCTCTC	TC(2*6)	194	12	GACGCCTTTACATGTGAGAAACTGATCTAGTGTTTTCAAATGCACTCCGAGCAGTGCCCGATCCCTTTAGATGACTCCAAATACATCAAGTG[TCTCTCTCTCTC]GCCTCTCTCCCCCCAAAACCGGCACGGTTTGACTGTATTTTGGACA	GACGCCTTTACATGTGAGAAACT	59.709	0.434783	TGTCCAAAATACAGTCAAACCGT	60.666	0.391304	150
isoform_111012_12563_5	TCTCTCTCTCTC	TC(2*6)	194	12	GACGCCTTTACATGTGAGAAACTGATCTAGTGTTTTCAAATGCACTCCGAGCAGTGCCCGATCCCTTTAGATGACTCCAAATACATCAAGTG[TCTCTCTCTCTC]GCCTCTCTCCCCCCAAAACCGGCACGGTTTGACTGTATTTTGGA	GACGCCTTTACATGTGAGAAACT	59.709	0.434783	TCCAAAATACAGTCAAACCGTG	59.898	0.409091	148
isoform_111032_12566_3	TCTCTCTCTCTCTCTCTCTCTCTCTC	TC(2*13)	313	26	TGTTATGAACAAACTGAATGCCATGGCCAGGATAGATGGTCGAAGAGCAAAACCAGCACTTCTCTAACCTCATGGCTGATCGCGAGAGCCTCTTTA[TCTCTCTCTCTCTCTCTCTCTCTCTC]TGTGCGATTGGGGATGCAGTCTCTGTAAGTCGGTAACG	TGTTATGAACAAACTGAATGCCA	60.403	0.347826	CGTTACCGACTTACAGAGACTGC	60.361	0.521739	160
isoform_111352_12575_1	CTCTCTCTCTCTCTCTCTCTCTCTCT	CT(2*13)	174	26	TTCTCCCAAAGCTTTTGAGTTCTCGGCATTCAGTGCGGTATA[CTCTCTCTCTCTCTCTCTCTCTCTCT]CAGCATTTGTTGCCTTGCAGGATTTCCCCAGGCCTACATCATGGCAGCCAGCTGCAAGCGCTTCATTGCAACTGTGCTAGTGGT	TTCTCCCAAAGCTTTTGAGTTCT	60.726	0.391304	ACCACTAGCACAGTTGCAATGAA	61.98	0.434783	152
isoform_111352_12575_2	CTCTCTCTCTCTCTCTCTCTCTCTCT	CT(2*13)	174	26	TTCTCCCAAAGCTTTTGAGTTCTCGGCATTCAGTGCGGTATA[CTCTCTCTCTCTCTCTCTCTCTCTCT]CAGCATTTGTTGCCTTGCAGGATTTCCCCAGGCCTACATCATGGCAGCCAGCTGCAAGCGCTTCATTGCAACTGTGCTAGTGG	TTCTCCCAAAGCTTTTGAGTTCT	60.726	0.391304	CCACTAGCACAGTTGCAATGAAG	62.09	0.478261	151
isoform_111352_12575_3	CTCTCTCTCTCTCTCTCTCTCTCTCT	CT(2*13)	174	26	CTCATCCTCTCTGTTGCAGTTCTCCCAAAGCTTTTGAGTTCTCGGCATTCAGTGCGGTATA[CTCTCTCTCTCTCTCTCTCTCTCTCT]CAGCATTTGTTGCCTTGCAGGATTT	CTCATCCTCTCTGTTGCAGTTCT	60.067	0.478261	AAATCCTGCAAGGCAACAAAT	60.845	0.380952	112
isoform_111352_12575_4	CTCTCTCTCTCTCTCTCTCTCTCTCT	CT(2*13)	174	26	TTCTCCCAAAGCTTTTGAGTTCTCGGCATTCAGTGCGGTATA[CTCTCTCTCTCTCTCTCTCTCTCTCT]CAGCATTTGTTGCCTTGCAGGATTTCCCCAGGCCTACATCATGGCAGCCAGCTGCAAGCGCTTCATTGCAACTGTGCTAGTGG	TTCTCCCAAAGCTTTTGAGTTCT	60.726	0.391304	CCACTAGCACAGTTGCAATGAA	61.241	0.454545	151
isoform_111352_12575_5	CTCTCTCTCTCTCTCTCTCTCTCTCT	CT(2*13)	174	26	TTCTCCCAAAGCTTTTGAGTTCTCGGCATTCAGTGCGGTATA[CTCTCTCTCTCTCTCTCTCTCTCTCT]CAGCATTTGTTGCCTTGCAGGATTTCCCCAGGCCTACATCATGGCAGCCAGCTGCAAGCGCTTCATTGCAACTGTGCTAGTG	TTCTCCCAAAGCTTTTGAGTTCT	60.726	0.391304	CACTAGCACAGTTGCAATGAAG	58.656	0.454545	150
isoform_111408_12580_3	GACGACGACGACGAC	GAC(3*5)	221	15	GATGATGCTGCAGATGAGGAGGACGCACGTGATGAGGGCGAAGGCGAGGAGGAAGTAGAGGGCCATGATGGTGGTGGAGGTGAGGATGAAGATGAT[GACGACGACGACGAC]GATGATGAAAATGGAAAAAGGGGATGATGAAGAAGA	GATGATGCTGCAGATGAGGAG	60.93	0.52381	TCTTCTTCATCATCCCCTTTTTC	60.757	0.391304	147
isoform_111743_12600_1	GTGTGTGTGTGTGTGTGTGT	GT(2*10)	390	20	CCAAGCATATTAATCCAACTTATTGTCTTTAGATATGGATCATCCATAACCC[GTGTGTGTGTGTGTGTGTGT]TTGTGTGGGTGGTTTTTTTTGGGGCCGTCGTGAGGCAGTGCTCGAAAAAAACTTTTTGCCGAAAACTTGGGAGAACTTGCATGT	CCAAGCATATTAATCCAACTTATTG	58.199	0.32	ACATGCAAGTTCTCCCAAGTTT	60.04	0.409091	156
isoform_111743_12600_3	GTGTGTGTGTGTGTGTGTGT	GT(2*10)	390	20	CTTCATTCCCACGTAATTAACCCCTCTTCCTATGTACCAAGCATATTAATCCAACTTATTGTCTTTAGATATGGATCATCCATAACCC[GTGTGTGTGTGTGTGTGTGT]TTGTGTGGGTGGTTTTTTTTGGGGCCGTCGTGAGGCAGTGCTCGAAAA	CTTCATTCCCACGTAATTAACCC	60.781	0.434783	TTTTCGAGCACTGCCTCAC	60.128	0.526316	156
isoform_111743_12600_4	GTGTGTGTGTGTGTGTGTGT	GT(2*10)	390	20	CCTTCATTCCCACGTAATTAACCCCTCTTCCTATGTACCAAGCATATTAATCCAACTTATTGTCTTTAGATATGGATCATCCATAACCC[GTGTGTGTGTGTGTGTGTGT]TTGTGTGGGTGGTTTTTTTTGGGGCCGTCGTGAGGCAGTGCTCGAAAA	CCTTCATTCCCACGTAATTAACC	60.781	0.434783	TTTTCGAGCACTGCCTCAC	60.128	0.526316	157
isoform_111743_12600_5	GTGTGTGTGTGTGTGTGTGT	GT(2*10)	390	20	CCAAGCATATTAATCCAACTTATTGTCTTTAGATATGGATCATCCATAACCC[GTGTGTGTGTGTGTGTGTGT]TTGTGTGGGTGGTTTTTTTTGGGGCCGTCGTGAGGCAGTGCTCGAAAAAAACTTTTTGCCGAAAACTTGGGAGAACTTGCATGT	CCAAGCATATTAATCCAACTTATTG	58.199	0.32	ACATGCAAGTTCTCCCAAGTTTT	61.24	0.391304	156
isoform_112117_12615_3	TCTCTCTCTCTC	TC(2*6)	367	12	CTGGAGTTCCAAGACATTCTCATGGAATGCGTCCATTTCAACTCCCACCCCGGCTTCCTCCTCAATGCTAACAACATCGCCT[TCTCTCTCTCTC]ACCCCCACTCTATGCCTCTTTCTAATGGTGGACTCT	CTGGAGTTCCAAGACATTCTCAT	59.63	0.434783	AGAGTCCACCATTAGAAAGAGGC	60.142	0.478261	130
isoform_112698_12647_1	GGAGGAGGAGGAGGAGGA	GGA(3*6)	261	18	GCCGTAAAGAGTCGATCAATAAAGCTAGCAAT[GGAGGAGGAGGAGGAGGA]GCAGGTTGCGCTGATGCAGAAGAGAAAAAGG	GCCGTAAAGAGTCGATCAATAAA	59.657	0.391304	CCTTTTTCTCTTCTGCATCAGC	60.503	0.454545	81
isoform_112698_12647_2	GGAGGAGGAGGAGGAGGA	GGA(3*6)	261	18	GCCGTAAAGAGTCGATCAATAAAGCTAGCAAT[GGAGGAGGAGGAGGAGGA]GCAGGTTGCGCTGATGCAGAAGAGAAAAAGGGCGTGCAGAGGAAGGCCAAGCCTGACGGGAGAGGAGGTGAAGGAGATG	GCCGTAAAGAGTCGATCAATAAA	59.657	0.391304	CATCTCCTTCACCTCCTCTCC	60.201	0.571429	129
isoform_112698_12647_3	GGAGGAGGAGGAGGAGGA	GGA(3*6)	261	18	GCCGTAAAGAGTCGATCAATAAAGCTAGCAAT[GGAGGAGGAGGAGGAGGA]GCAGGTTGCGCTGATGCAGAAGAGAAAAAGGGCGTGCAGAGGAAGGCCAAGCCTGACGGGAGAGGAGGTGAAGGAGATGG	GCCGTAAAGAGTCGATCAATAAA	59.657	0.391304	CCATCTCCTTCACCTCCTCTC	60.201	0.571429	130
isoform_112698_12647_4	GGAGGAGGAGGAGGAGGA	GGA(3*6)	261	18	GCCGTAAAGAGTCGATCAATAAAGCTAGCAAT[GGAGGAGGAGGAGGAGGA]GCAGGTTGCGCTGATGCAGAAGAGAAAAAGGGC	GCCGTAAAGAGTCGATCAATAAA	59.657	0.391304	GCCCTTTTTCTCTTCTGCATC	60.334	0.47619	83
isoform_112698_12647_5	GGAGGAGGAGGAGGAGGA	GGA(3*6)	261	18	GCCGTAAAGAGTCGATCAATAAAGCTAGCAAT[GGAGGAGGAGGAGGAGGA]GCAGGTTGCGCTGATGCAGAAGAGAAAAAGGG	GCCGTAAAGAGTCGATCAATAAA	59.657	0.391304	CCCTTTTTCTCTTCTGCATCA	59.438	0.428571	82
isoform_112786_12653_1	CCTCCTCCTCCTCCT	CCT(3*5)	236	15	CCTCAAGTCACCAAAGCGTCGAGCGCCCAGTTTTGCGACTCCCTGAGGACAACCGCCGCCGTCGAAACCACTCCCGATCCGATCCTCGCGTCA[CCTCCTCCTCCTCCT]TCTAAGCAAGACAAAACTGATTCAAGC	CCTCAAGTCACCAAAGCGTC	60.833	0.55	GCTTGAATCAGTTTTGTCTTGCT	59.947	0.391304	135
isoform_112786_12653_2	CCTCCTCCTCCTCCT	CCT(3*5)	236	15	GACGCCTCAAGTCACCAAAGCGTCGAGCGCCCAGTTTTGCGACTCCCTGAGGACAACCGCCGCCGTCGAAACCACTCCCGATCCGATCCTCGCGTCA[CCTCCTCCTCCTCCT]TCTAAGCAAGACAAAACTGATTCAAGC	GACGCCTCAAGTCACCAAAG	60.833	0.55	GCTTGAATCAGTTTTGTCTTGCT	59.947	0.391304	139
isoform_112786_12653_3	CCTCCTCCTCCTCCT	CCT(3*5)	236	15	CAGTTTTGCGACTCCCTGAGGACAACCGCCGCCGTCGAAACCACTCCCGATCCGATCCTCGCGTCA[CCTCCTCCTCCTCCT]TCTAAGCAAGACAAAACTGATTCAAGC	CAGTTTTGCGACTCCCTGAG	60.964	0.55	GCTTGAATCAGTTTTGTCTTGCT	59.947	0.391304	108
isoform_112786_12653_4	CCTCCTCCTCCTCCT	CCT(3*5)	236	15	CCTCAAGTCACCAAAGCGTCGAGCGCCCAGTTTTGCGACTCCCTGAGGACAACCGCCGCCGTCGAAACCACTCCCGATCCGATCCTCGCGTCA[CCTCCTCCTCCTCCT]TCTAAGCAAGACAAAACTGATTCAAGCAAGG	CCTCAAGTCACCAAAGCGTC	60.833	0.55	CCTTGCTTGAATCAGTTTTGTCT	59.812	0.391304	139
isoform_112786_12653_5	CCTCCTCCTCCTCCT	CCT(3*5)	236	15	GACGCCTCAAGTCACCAAAGCGTCGAGCGCCCAGTTTTGCGACTCCCTGAGGACAACCGCCGCCGTCGAAACCACTCCCGATCCGATCCTCGCGTCA[CCTCCTCCTCCTCCT]TCTAAGCAAGACAAAACTGATTCAAGCAAGG	GACGCCTCAAGTCACCAAAG	60.833	0.55	CCTTGCTTGAATCAGTTTTGTCT	59.812	0.391304	143
isoform_113061_12665_1	CCGCCTCCGCCTCCGCCTCCGCCT	CCGCCT(6*4)	228	24	ATCTCGACAGCTACTCGTACAGGCAAGCCATGGGCCTCCGCCTACTCAAAGCGGG[CCGCCTCCGCCTCCGCCTCCGCCT]CCAAGCAGAGCTGCCTGGCCTAACTACTCCTGGTGGCGCCACTCCACCTAAGCAGCTACT	ATCTCGACAGCTACTCGTACAGG	59.978	0.521739	AGTAGCTGCTTAGGTGGAGTGG	59.964	0.545455	139
isoform_113061_12665_2	CCGCCTCCGCCTCCGCCTCCGCCT	CCGCCT(6*4)	228	24	TCATCTCGACAGCTACTCGTACAGGCAAGCCATGGGCCTCCGCCTACTCAAAGCGGG[CCGCCTCCGCCTCCGCCTCCGCCT]CCAAGCAGAGCTGCCTGGCCTAACTACTCCTGGTGGCGCCACTCCACCTAAGCAGCTACT	TCATCTCGACAGCTACTCGTACA	60.088	0.478261	AGTAGCTGCTTAGGTGGAGTGG	59.964	0.545455	141
isoform_113061_12665_3	CCGCCTCCGCCTCCGCCTCCGCCT	CCGCCT(6*4)	228	24	ATCTCGACAGCTACTCGTACAGGCAAGCCATGGGCCTCCGCCTACTCAAAGCGGG[CCGCCTCCGCCTCCGCCTCCGCCT]CCAAGCAGAGCTGCCTGGCCTAACTACT	ATCTCGACAGCTACTCGTACAGG	59.978	0.521739	AGTAGTTAGGCCAGGCAGCTCT	60.922	0.545455	107
isoform_113061_12665_4	CCGCCTCCGCCTCCGCCTCCGCCT	CCGCCT(6*4)	228	24	TCATCTCGACAGCTACTCGTACAGGCAAGCCATGGGCCTCCGCCTACTCAAAGCGGG[CCGCCTCCGCCTCCGCCTCCGCCT]CCAAGCAGAGCTGCCTGGCCTAACTACT	TCATCTCGACAGCTACTCGTACA	60.088	0.478261	AGTAGTTAGGCCAGGCAGCTCT	60.922	0.545455	109
isoform_113061_12665_5	CCGCCTCCGCCTCCGCCTCCGCCT	CCGCCT(6*4)	228	24	ATCTCGACAGCTACTCGTACAGGCAAGCCATGGGCCTCCGCCTACTCAAAGCGGG[CCGCCTCCGCCTCCGCCTCCGCCT]CCAAGCAGAGCTGCCTGGCCTAACTAC	ATCTCGACAGCTACTCGTACAGG	59.978	0.521739	GTAGTTAGGCCAGGCAGCTCT	60.054	0.571429	106
isoform_113087_12669_2	TGTGTGTGTGTGTGTG	TG(2*8)	234	16	CGATGCTTGTAATGCGTTATCTTTCTGTAGATACTCATGCGGAAATTTTCAGTGCACTGAGGTTCGGATCCTGCGCTC[TGTGTGTGTGTGTGTG]GTTGGGGCTAGGTTTGTAAGATAA	CGATGCTTGTAATGCGTTATCTT	60.509	0.391304	TTATCTTACAAACCTAGCCCCAA	59.098	0.391304	118
isoform_113087_12669_5	TGTGTGTGTGTGTGTG	TG(2*8)	234	16	CGATGCTTGTAATGCGTTATCTTTCTGTAGATACTCATGCGGAAATTTTCAGTGCACTGAGGTTCGGATCCTGCGCTC[TGTGTGTGTGTGTGTG]GTTGGGGCTAGGTTTGTAAGATAAG	CGATGCTTGTAATGCGTTATCTT	60.509	0.391304	CTTATCTTACAAACCTAGCCCCAA	59.925	0.416667	119
isoform_113569_12687_1	GCAGCAGCAGCAGCAGCAGCA	GCA(3*7)	321	21	GTTCCTTCGGCTTCTTCATATCTTCCGTGCTCCTTAATGGAGGTGCCGGCAGGAACGCAACC[GCAGCAGCAGCAGCAGCAGCA]GCCGAAGAAACCCCTCTCCATCGATTACAGCTTTTGAAGCAATC	GTTCCTTCGGCTTCTTCATATCT	60.108	0.434783	GATTGCTTCAAAAGCTGTAATCG	60.264	0.391304	127
isoform_113569_12687_2	GCAGCAGCAGCAGCAGCAGCA	GCA(3*7)	321	21	CTTCATATCTTCCGTGCTCCTTAATGGAGGTGCCGGCAGGAACGCAACC[GCAGCAGCAGCAGCAGCAGCA]GCCGAAGAAACCCCTCTCCATCGATTACAGCTTTTGAAGCAATC	CTTCATATCTTCCGTGCTCCTTA	59.765	0.434783	GATTGCTTCAAAAGCTGTAATCG	60.264	0.391304	114
isoform_113569_12687_3	GCAGCAGCAGCAGCAGCAGCA	GCA(3*7)	321	21	CTTCATATCTTCCGTGCTCCTTAATGGAGGTGCCGGCAGGAACGCAACC[GCAGCAGCAGCAGCAGCAGCA]GCCGAAGAAACCCCTCTCCATCGATTACAGCTTTTGAAGCAATCTCGGCTACTGCTTCTTTGTATGT	CTTCATATCTTCCGTGCTCCTTA	59.765	0.434783	ACATACAAAGAAGCAGTAGCCGA	60.321	0.434783	137
isoform_113569_12687_4	GCAGCAGCAGCAGCAGCAGCA	GCA(3*7)	321	21	CTTCATATCTTCCGTGCTCCTTAATGGAGGTGCCGGCAGGAACGCAACC[GCAGCAGCAGCAGCAGCAGCA]GCCGAAGAAACCCCTCTCCATCGATTACAGCTTTTGAAGCAATCTCGGCTACTGCTTCTTTGTATGTC	CTTCATATCTTCCGTGCTCCTTA	59.765	0.434783	GACATACAAAGAAGCAGTAGCCG	60.321	0.478261	138
isoform_113569_12687_5	GCAGCAGCAGCAGCAGCAGCA	GCA(3*7)	321	21	CTTCATATCTTCCGTGCTCCTTAATGGAGGTGCCGGCAGGAACGCAACC[GCAGCAGCAGCAGCAGCAGCA]GCCGAAGAAACCCCTCTCCATCGATTACAGCTTTTGAAGCAATCTCGGCTACTGCTTCTTTGTAT	CTTCATATCTTCCGTGCTCCTTA	59.765	0.434783	ATACAAAGAAGCAGTAGCCGAGA	59.594	0.434783	135
isoform_113652_12691_1	CCCCCCCCCCCCCC	C(1*14)	155	14	TATATAGGCGAAGGGATCTCTGGCAGCCCTCTCTCTCCTCCTGCTCTCACGCACAACCACCTACCCTCTGGCTCTCTCTCATCTCTCG[TCTCTCTCTCTCTC]CCCCTCCCCCTCCCCCCCCCCCCCCAAATTACATGGCTTTCTTCTTCGTTTG	TATATAGGCGAAGGGATCTCTGG	60.754	0.478261	CAAACGAAGAAGAAAGCCATGTA	60.63	0.391304	154
isoform_113652_12691_2	CCCCCCCCCCCCCC	C(1*14)	155	14	TATATAGGCGAAGGGATCTCTGGCAGCCCTCTCTCTCCTCCTGCTCTCACGCACAACCACCTACCCTCTGGCTCTCTCTCATCTCTCG[TCTCTCTCTCTCTC]CCCCTCCCCCTCCCCCCCCCCCCCCAAATTACATGGCTTTCTTCTTCGTTT	TATATAGGCGAAGGGATCTCTGG	60.754	0.478261	AAACGAAGAAGAAAGCCATGTAA	59.341	0.347826	153
isoform_113820_12698_1	CAGCAGCAGCAGCAG	CAG(3*5)	226	15	AGCCGATACTATCACAAAGGTCAAGACTCCAACGCCTCGACTCTCTCCTGCGCCAA[CAGCAGCAGCAGCAG]CGAGCAGCAGGGTCGCCGAGTGATTTGGGGTTTCGTTTCACACTTGGGCTTCTACAG	AGCCGATACTATCACAAAGGTCA	60.035	0.434783	CTGTAGAAGCCCAAGTGTGAAAC	60.212	0.478261	128
isoform_113820_12698_2	CAGCAGCAGCAGCAG	CAG(3*5)	226	15	CAGCCGATACTATCACAAAGGTCAAGACTCCAACGCCTCGACTCTCTCCTGCGCCAA[CAGCAGCAGCAGCAG]CGAGCAGCAGGGTCGCCGAGTGATTTGGGGTTTCGTTTCACACTTGGGCTTCTACAG	CAGCCGATACTATCACAAAGGTC	60.035	0.478261	CTGTAGAAGCCCAAGTGTGAAAC	60.212	0.478261	129
isoform_113820_12698_3	CAGCAGCAGCAGCAG	CAG(3*5)	226	15	TCAGCCGATACTATCACAAAGGTCAAGACTCCAACGCCTCGACTCTCTCCTGCGCCAA[CAGCAGCAGCAGCAG]CGAGCAGCAGGGTCGCCGAGTGATTTGGGGTTTCGTTTCACACTTGGGCTTCTACAG	TCAGCCGATACTATCACAAAGGT	60.035	0.434783	CTGTAGAAGCCCAAGTGTGAAAC	60.212	0.478261	130
isoform_113820_12698_4	CAGCAGCAGCAGCAG	CAG(3*5)	226	15	ATCACAAAGGTCAAGACTCCAACGCCTCGACTCTCTCCTGCGCCAA[CAGCAGCAGCAGCAG]CGAGCAGCAGGGTCGCCGAGTGATTTGGGGTTTCGTTTCACACTTGGGCTTCTACAGCATCTGGTCCACCACACGCAATCAGACCCTCAATTTACTCG	ATCACAAAGGTCAAGACTCCAAC	59.538	0.434783	CGAGTAAATTGAGGGTCTGATTG	60.008	0.434783	159
isoform_113820_12698_5	CAGCAGCAGCAGCAG	CAG(3*5)	226	15	GCCGATACTATCACAAAGGTCAAGACTCCAACGCCTCGACTCTCTCCTGCGCCAA[CAGCAGCAGCAGCAG]CGAGCAGCAGGGTCGCCGAGTGATTTGGGGTTTCGTTTCACACTTGGGCTTCTACAG	GCCGATACTATCACAAAGGTCAA	60.377	0.434783	CTGTAGAAGCCCAAGTGTGAAAC	60.212	0.478261	127
isoform_113851_12700_1	TGTGTGTGTGTGTGTGTGTGTG	TG(2*11)	316	22	ATAATTGGTAGCCTGCTGCTTT[TGTGTGTGTGTGTGTGTGTGTG]TTGAGGATGGCTTTTGTGGTTCTTTCCACAAAATGCAGGGCAACCTGGGGGTAGTCTCTTTGTGGCTGCCACCAACCTAGGCAATTTTGTCTT	ATAATTGGTAGCCTGCTGCTTTT	60.491	0.391304	AAGACAAAATTGCCTAGGTTGGT	60.274	0.391304	137
isoform_113851_12700_2	TGTGTGTGTGTGTGTGTGTGTG	TG(2*11)	316	22	TATAATTGGTAGCCTGCTGCTTT[TGTGTGTGTGTGTGTGTGTGTG]TTGAGGATGGCTTTTGTGGTTCTTTCCACAAAATGCAGGGCAACCTGGGGGTAGTCTCTTTGTGGCTGCCACCAACCTAGGCAATTTTGTCTT	TATAATTGGTAGCCTGCTGCTTT	59.367	0.391304	AAGACAAAATTGCCTAGGTTGGT	60.274	0.391304	138
isoform_113851_12700_3	TGTGTGTGTGTGTGTGTGTGTG	TG(2*11)	316	22	TTATAATTGGTAGCCTGCTGCTTT[TGTGTGTGTGTGTGTGTGTGTG]TTGAGGATGGCTTTTGTGGTTCTTTCCACAAAATGCAGGGCAACCTGGGGGTAGTCTCTTTGTGGCTGCCACCAACCTAGGCAATTTTGTCTT	TTATAATTGGTAGCCTGCTGCTT	59.367	0.391304	AAGACAAAATTGCCTAGGTTGGT	60.274	0.391304	139
isoform_113851_12700_4	TGTGTGTGTGTGTGTGTGTGTG	TG(2*11)	316	22	TTTATAATTGGTAGCCTGCTGCTTT[TGTGTGTGTGTGTGTGTGTGTG]TTGAGGATGGCTTTTGTGGTTCTTTCCACAAAATGCAGGGCAACCTGGGGGTAGTCTCTTTGTGGCTGCCACCAACCTAGGCAATTTTGTCTT	TTTATAATTGGTAGCCTGCTGCT	59.367	0.391304	AAGACAAAATTGCCTAGGTTGGT	60.274	0.391304	140
isoform_113851_12700_5	TGTGTGTGTGTGTGTGTGTGTG	TG(2*11)	316	22	ATAATTGGTAGCCTGCTGCTTT[TGTGTGTGTGTGTGTGTGTGTG]TTGAGGATGGCTTTTGTGGTTCTTTCCACAAAATGCAGGGCAACCTGGGGGTAGTCTCTTTGTGGCTGCCACCAACCTAGGCAATTTTGTCTTGA	ATAATTGGTAGCCTGCTGCTTTT	60.491	0.391304	TCAAGACAAAATTGCCTAGGTTG	60.506	0.391304	139
isoform_114096_12716_1	AGAGAGAGAGAGAGAGAGAGAGAGAGAGAGAGAGAGAGAGAGAGAG	AG(2*23)	197	46	GAATATGAGCACTCTTCAGACGCAGACGCAGACGC[AGAGAGAGAGAGAGAGAGAGAGAGAGAGAGAGAGAGAGAGAGAGAG]TCAGAGTCAGTCGTCCTATGCTAACAGAGCTAACATTGGGCGGGGTCAGCTGTGTATGGCTTGATTGTCAAGGTTTATT	GAATATGAGCACTCTTCAGACGC	60.415	0.478261	AATAAACCTTGACAATCAAGCCA	59.891	0.347826	160
isoform_114096_12716_2	AGAGAGAGAGAGAGAGAGAGAGAGAGAGAGAGAGAGAGAGAGAGAG	AG(2*23)	197	46	GAATATGAGCACTCTTCAGACGCAGACGCAGACGC[AGAGAGAGAGAGAGAGAGAGAGAGAGAGAGAGAGAGAGAGAGAGAG]TCAGAGTCAGTCGTCCTATGCTAACAGAGCTAACATTGGGCGGGGTCAGCTGTGTATGGCTTGATTGTCAAGGT	GAATATGAGCACTCTTCAGACGC	60.415	0.478261	ACCTTGACAATCAAGCCATACAC	60.296	0.434783	155
isoform_114096_12716_3	AGAGAGAGAGAGAGAGAGAGAGAGAGAGAGAGAGAGAGAGAGAGAG	AG(2*23)	197	46	GAATATGAGCACTCTTCAGACGCAGACGCAGACGC[AGAGAGAGAGAGAGAGAGAGAGAGAGAGAGAGAGAGAGAGAGAGAG]TCAGAGTCAGTCGTCCTATGCTAACAGAGCTAACATTGGGCGGGGTCAGCTGTGTATGGCTTGATTGTCAAG	GAATATGAGCACTCTTCAGACGC	60.415	0.478261	CTTGACAATCAAGCCATACACAG	59.685	0.434783	153
isoform_114096_12716_4	AGAGAGAGAGAGAGAGAGAGAGAGAGAGAGAGAGAGAGAGAGAGAG	AG(2*23)	197	46	GAATATGAGCACTCTTCAGACGCAGACGCAGACGC[AGAGAGAGAGAGAGAGAGAGAGAGAGAGAGAGAGAGAGAGAGAGAG]TCAGAGTCAGTCGTCCTATGCTAACAGAGCTAACATTGGGCGGGGTCAGCTGTGTATGGCTTGATTGTCAAGGTTT	GAATATGAGCACTCTTCAGACGC	60.415	0.478261	AAACCTTGACAATCAAGCCATAC	59.428	0.391304	157
isoform_114096_12716_5	AGAGAGAGAGAGAGAGAGAGAGAGAGAGAGAGAGAGAGAGAGAGAG	AG(2*23)	197	46	ATATGAGCACTCTTCAGACGCAGACGCAGACGC[AGAGAGAGAGAGAGAGAGAGAGAGAGAGAGAGAGAGAGAGAGAGAG]TCAGAGTCAGTCGTCCTATGCTAACAGAGCTAACATTGGGCGGGGTCAGCTGTGTATGGCTTGATTGTCAAGGTTTATT	ATATGAGCACTCTTCAGACGCAG	60.956	0.478261	AATAAACCTTGACAATCAAGCCA	59.891	0.347826	158
isoform_114097_12718_1	CTCTCTCTCTCTCTCTCT	CT(2*9)	230	18	TCTCTCTAGAACCCTCTCCAAGCAAAGAGGGGGTAGAGGGCTACATGG[CTCTCTCTCTCTCTCTCT]CCTCTCCTCTCTCTCTCGTCGAGCAGCACGGACAGGGGCGCAGCCCATTATGTACACACTTCTATCAGGTCTTGAGAAGGAATGAAAA	TCTCTCTAGAACCCTCTCCAAGC	60.503	0.521739	TTTTCATTCCTTCTCAAGACCTG	59.749	0.391304	154
isoform_114097_12718_2	CTCTCTCTCTCTCTCTCT	CT(2*9)	230	18	TCTCTCTAGAACCCTCTCCAAGCAAAGAGGGGGTAGAGGGCTACATGG[CTCTCTCTCTCTCTCTCT]CCTCTCCTCTCTCTCTCGTCGAGCAGCACGGACAGGGGCGCAGCCCATTATGTACACACTTCTATCAGGTCTTGAGAAGGAATGAAAAGGACA	TCTCTCTAGAACCCTCTCCAAGC	60.503	0.521739	TGTCCTTTTCATTCCTTCTCAAG	59.749	0.391304	159
isoform_114097_12718_3	CTCTCTCTCTCTCTCTCT	CT(2*9)	230	18	TCTCTCTAGAACCCTCTCCAAGCAAAGAGGGGGTAGAGGGCTACATGG[CTCTCTCTCTCTCTCTCT]CCTCTCCTCTCTCTCTCGTCGAGCAGCACGGACAGGGGCGCAGCCCATTATGTACACACTTCTATCAGGTCTTGAGAAGGAATGAAAAGGACAG	TCTCTCTAGAACCCTCTCCAAGC	60.503	0.521739	CTGTCCTTTTCATTCCTTCTCAA	59.749	0.391304	160
isoform_114097_12718_4	CTCTCTCTCTCTCTCTCT	CT(2*9)	230	18	TCTCTCTAGAACCCTCTCCAAGCAAAGAGGGGGTAGAGGGCTACATGG[CTCTCTCTCTCTCTCTCT]CCTCTCCTCTCTCTCTCGTCGAGCAGCACGGACAGGGGCGCAGCCCATTATGTACACACTTCTATCAGGTCTTGAGAAGGAATGAAAAGG	TCTCTCTAGAACCCTCTCCAAGC	60.503	0.521739	CCTTTTCATTCCTTCTCAAGACC	60.452	0.434783	156
isoform_114097_12718_5	CTCTCTCTCTCTCTCTCT	CT(2*9)	230	18	CTCTAGAACCCTCTCCAAGCAAAGAGGGGGTAGAGGGCTACATGG[CTCTCTCTCTCTCTCTCT]CCTCTCCTCTCTCTCTCGTCGAGCAGCACGGACAGGGGCGCAGCCCATTATGTACACACTTCTATCAGGTCTTGAGAAGGAATGAAAA	CTCTAGAACCCTCTCCAAGCAA	60.012	0.5	TTTTCATTCCTTCTCAAGACCTG	59.749	0.391304	151
isoform_114345_12730_1	TCTCTCTCTCTCTCTCTCTCTCTCTCTCTCTCTCTCTC	TC(2*19)	170	38	GGAGTATGGGGGAGGGAT[TCTCTCTCTCTCTCTCTCTCTCTCTCTCTCTCTCTCTC]TGCCTTTACGTGGGCAAGTTTGCAGCGATCAAGCCTGGCAGATCAGTAAAGTTGAAGGCGTTATCTAATTTGTTTGGG	GGAGTATGGGGGAGGGATT	59.962	0.578947	CCCAAACAAATTAGATAACGCCT	60.564	0.391304	134
isoform_114345_12730_2	TCTCTCTCTCTCTCTCTCTCTCTCTCTCTCTCTCTCTC	TC(2*19)	170	38	GGAGTATGGGGGAGGGAT[TCTCTCTCTCTCTCTCTCTCTCTCTCTCTCTCTCTCTC]TGCCTTTACGTGGGCAAGTTTGCAGCGATCAAGCCTGGCAGATCAGTAAAGTTGAA	GGAGTATGGGGGAGGGATT	59.962	0.578947	TTCAACTTTACTGATCTGCCAGG	60.647	0.434783	112
isoform_114345_12730_3	TCTCTCTCTCTCTCTCTCTCTCTCTCTCTCTCTCTCTC	TC(2*19)	170	38	GGAGTATGGGGGAGGGAT[TCTCTCTCTCTCTCTCTCTCTCTCTCTCTCTCTCTCTC]TGCCTTTACGTGGGCAAGTTTGCAGCGATCAAGCCTGGCAGATCAGTAAAGTTGAAGG	GGAGTATGGGGGAGGGATT	59.962	0.578947	CCTTCAACTTTACTGATCTGCCA	60.647	0.434783	114
isoform_114345_12730_4	TCTCTCTCTCTCTCTCTCTCTCTCTCTCTCTCTCTCTC	TC(2*19)	170	38	GGAGTATGGGGGAGGGAT[TCTCTCTCTCTCTCTCTCTCTCTCTCTCTCTCTCTCTC]TGCCTTTACGTGGGCAAGTTTGCAGCGATCAAGCCTGGCAGATCAGTAAAGTT	GGAGTATGGGGGAGGGATT	59.962	0.578947	AACTTTACTGATCTGCCAGGCTT	60.65	0.434783	109
isoform_114345_12730_5	TCTCTCTCTCTCTCTCTCTCTCTCTCTCTCTCTCTCTC	TC(2*19)	170	38	GGAGTATGGGGGAGGGAT[TCTCTCTCTCTCTCTCTCTCTCTCTCTCTCTCTCTCTC]TGCCTTTACGTGGGCAAGTTTGCAGCGATCAAGCCTGGCAGATCAGTAAAGTTGAAGGCGTTATCTAATTTGTTTGGGGGA	GGAGTATGGGGGAGGGATT	59.962	0.578947	TCCCCCAAACAAATTAGATAACG	61.204	0.391304	137
isoform_11455_2248_1	ACACACACACAC	AC(2*6)	181	12	CACACCTGCATTCTCCTTAAGTTCAACTTCCTCACTCACACATACACAGCATTCTTCTCTTTCCTCATCTTCCTTCGCAT[ACACACACACAC]GCCCGCACTCACACTACAAACAGGATCG	CACACCTGCATTCTCCTTAAGTT	59.703	0.434783	CGATCCTGTTTGTAGTGTGAGTG	59.711	0.478261	120
isoform_11455_2248_5	ACACACACACAC	AC(2*6)	181	12	CACCTGCATTCTCCTTAAGTTCAACTTCCTCACTCACACATACACAGCATTCTTCTCTTTCCTCATCTTCCTTCGCAT[ACACACACACAC]GCCCGCACTCACACTACAAACAGGATCG	CACCTGCATTCTCCTTAAGTTCA	60.647	0.434783	CGATCCTGTTTGTAGTGTGAGTG	59.711	0.478261	118
isoform_11463_2252_1	AAGAAGAAGAAGAAG	AAG(3*5)	1498	15	GAACCATTCGTCCTGAGTTTTCGGCAGCACGAGCGCTCCTTACTGCCAGTACAGGCTGTCCAGCGTCTTCAGCAGAGAGTGCAGGTTGCT[AAGAAGAAGAAGAAG]AAACAGCAGCAGCAGCAAAGGACAATGGTGGAGGACAGAGTAG	GAACCATTCGTCCTGAGTTTTC	59.983	0.454545	CTACTCTGTCCTCCACCATTGTC	60.045	0.521739	148
isoform_11463_2252_2	AAGAAGAAGAAGAAG	AAG(3*5)	1498	15	GAACCATTCGTCCTGAGTTTTCGGCAGCACGAGCGCTCCTTACTGCCAGTACAGGCTGTCCAGCGTCTTCAGCAGAGAGTGCAGGTTGCT[AAGAAGAAGAAGAAG]AAACAGCAGCAGCAGCAAAGGACAATGGTGGAGGACAGAGTAGAAGCAGA	GAACCATTCGTCCTGAGTTTTC	59.983	0.454545	TCTGCTTCTACTCTGTCCTCCAC	60.067	0.521739	155
isoform_11463_2252_3	AAGAAGAAGAAGAAG	AAG(3*5)	1498	15	GAACCATTCGTCCTGAGTTTTCGGCAGCACGAGCGCTCCTTACTGCCAGTACAGGCTGTCCAGCGTCTTCAGCAGAGAGTGCAGGTTGCT[AAGAAGAAGAAGAAG]AAACAGCAGCAGCAGCAAAGGACAATGGTGGAGGACAGAGTAGAAGCAGAC	GAACCATTCGTCCTGAGTTTTC	59.983	0.454545	GTCTGCTTCTACTCTGTCCTCCA	60.067	0.521739	156
isoform_11463_2252_4	AAGAAGAAGAAGAAG	AAG(3*5)	1498	15	GAACCATTCGTCCTGAGTTTTCGGCAGCACGAGCGCTCCTTACTGCCAGTACAGGCTGTCCAGCGTCTTCAGCAGAGAGTGCAGGTTGCT[AAGAAGAAGAAGAAG]AAACAGCAGCAGCAGCAAAGGACAATGGTGGAGGACAGAGTAGAAGCAGACA	GAACCATTCGTCCTGAGTTTTC	59.983	0.454545	TGTCTGCTTCTACTCTGTCCTCC	60.067	0.521739	157
isoform_11463_2252_5	AAGAAGAAGAAGAAG	AAG(3*5)	1498	15	GAACCATTCGTCCTGAGTTTTCGGCAGCACGAGCGCTCCTTACTGCCAGTACAGGCTGTCCAGCGTCTTCAGCAGAGAGTGCAGGTTGCT[AAGAAGAAGAAGAAG]AAACAGCAGCAGCAGCAAAGGACAATGGTGGAGGACAGAGTAGAA	GAACCATTCGTCCTGAGTTTTC	59.983	0.454545	TTCTACTCTGTCCTCCACCATTG	60.534	0.478261	150
isoform_11482_2256_1	CACGCACGCACGCACGCACG	CACG(4*5)	324	20	CCATTTTGCCACTTCTACACCTTGGAGTGGGGGTGTTTGCGTGTGTAGGGGCCTCCCCTGCATCCACTTCATCCCACTGCGCTTCATCTTCGTCGTCTCGACACACACACGCA[CACGCACGCACGCACGCACG]CACAGCAACTCACTAACCTTGACA	CCATTTTGCCACTTCTACACCT	60.405	0.454545	TGTCAAGGTTAGTGAGTTGCTGT	58.971	0.434783	157
isoform_11482_2256_2	CACGCACGCACGCACGCACG	CACG(4*5)	324	20	CCATTTTGCCACTTCTACACCTTGGAGTGGGGGTGTTTGCGTGTGTAGGGGCCTCCCCTGCATCCACTTCATCCCACTGCGCTTCATCTTCGTCGTCTCGACACACACACGCA[CACGCACGCACGCACGCACG]CACAGCAACTCACTAACCTTGACAG	CCATTTTGCCACTTCTACACCT	60.405	0.454545	CTGTCAAGGTTAGTGAGTTGCTGT	59.911	0.458333	158
isoform_11482_2256_3	CACGCACGCACGCACGCACG	CACG(4*5)	324	20	CACTTCTACACCTTGGAGTGGGGGTGTTTGCGTGTGTAGGGGCCTCCCCTGCATCCACTTCATCCCACTGCGCTTCATCTTCGTCGTCTCGACACACACACGCA[CACGCACGCACGCACGCACG]CACAGCAACTCACTAACCTTGACAG	CACTTCTACACCTTGGAGTGGG	60.95	0.545455	CTGTCAAGGTTAGTGAGTTGCTG	59.108	0.478261	149
isoform_11482_2256_4	CACGCACGCACGCACGCACG	CACG(4*5)	324	20	CACTTCTACACCTTGGAGTGGGGGTGTTTGCGTGTGTAGGGGCCTCCCCTGCATCCACTTCATCCCACTGCGCTTCATCTTCGTCGTCTCGACACACACACGCA[CACGCACGCACGCACGCACG]CACAGCAACTCACTAACCTTGACA	CACTTCTACACCTTGGAGTGGG	60.95	0.545455	TGTCAAGGTTAGTGAGTTGCTGT	58.971	0.434783	148
isoform_11482_2256_5	CACGCACGCACGCACGCACG	CACG(4*5)	324	20	CACTTCTACACCTTGGAGTGGGGGTGTTTGCGTGTGTAGGGGCCTCCCCTGCATCCACTTCATCCCACTGCGCTTCATCTTCGTCGTCTCGACACACACACGCA[CACGCACGCACGCACGCACG]CACAGCAACTCACTAACCTTGACAG	CACTTCTACACCTTGGAGTGGG	60.95	0.545455	CTGTCAAGGTTAGTGAGTTGCTGT	59.911	0.458333	149
isoform_11518_2268_1	AGAGAGAGAGAGAGAG	AG(2*8)	890	16	TTTTGAGGCTTTAAGATCATTGGTGCAGTGTTCTCCCTTCAATCTTTCTAACCTCTTTATCTATGAGCCTAAGAAGAGAGGTGTTAACATCGCAGGC[AGAGAGAGAGAGAGAG]GAGAGAGAGAAGGAGAGGATGAGAGTATGGAGAGAGGACG	TTTTGAGGCTTTAAGATCATTGG	59.632	0.347826	CGTCCTCTCTCCATACTCTCATC	59.36	0.521739	153
isoform_11518_2268_2	AGAGAGAGAGAGAGAG	AG(2*8)	890	16	TTGAGGCTTTAAGATCATTGGTGCAGTGTTCTCCCTTCAATCTTTCTAACCTCTTTATCTATGAGCCTAAGAAGAGAGGTGTTAACATCGCAGGC[AGAGAGAGAGAGAGAG]GAGAGAGAGAAGGAGAGGATGAGAGTATGGAGAGAGGACG	TTGAGGCTTTAAGATCATTGGTG	60.476	0.391304	CGTCCTCTCTCCATACTCTCATC	59.36	0.521739	151
isoform_11518_2268_3	AGAGAGAGAGAGAGAG	AG(2*8)	890	16	TTTTGAGGCTTTAAGATCATTGGTGCAGTGTTCTCCCTTCAATCTTTCTAACCTCTTTATCTATGAGCCTAAGAAGAGAGGTGTTAACATCGCAGGC[AGAGAGAGAGAGAGAG]GAGAGAGAGAAGGAGAGGATGAGAGTATGGAGAGAGGACGG	TTTTGAGGCTTTAAGATCATTGG	59.632	0.347826	CCGTCCTCTCTCCATACTCTCAT	60.998	0.521739	154
isoform_11518_2268_4	AGAGAGAGAGAGAGAG	AG(2*8)	890	16	CAGTGTTCTCCCTTCAATCTTTCTAACCTCTTTATCTATGAGCCTAAGAAGAGAGGTGTTAACATCGCAGGC[AGAGAGAGAGAGAGAG]GAGAGAGAGAAGGAGAGGATGAGAGTATGGAGAGAGGACG	CAGTGTTCTCCCTTCAATCTTTC	59.268	0.434783	CGTCCTCTCTCCATACTCTCATC	59.36	0.521739	128
isoform_11518_2268_5	AGAGAGAGAGAGAGAG	AG(2*8)	890	16	TTTGAGGCTTTAAGATCATTGGTGCAGTGTTCTCCCTTCAATCTTTCTAACCTCTTTATCTATGAGCCTAAGAAGAGAGGTGTTAACATCGCAGGC[AGAGAGAGAGAGAGAG]GAGAGAGAGAAGGAGAGGATGAGAGTATGGAGAGAGGACG	TTTGAGGCTTTAAGATCATTGGT	59.175	0.347826	CGTCCTCTCTCCATACTCTCATC	59.36	0.521739	152
isoform_115398_12772_1	TCCTCCTCCTCCTCCTCC	TCC(3*6)	169	18	CTCCTTCAAGTGGCAGAAGAGCCCGCTGCCGCCTCCTCT[TCCTCCTCCTCCTCCTCC]GTCTCCCCCAAAAGCTAGCACACATGTACTACTACATCTGTACAGTACTCATTTGAGTGAGTATTTCTTACACAATGGTAAGCTCTCATTCAGTTGC	CTCCTTCAAGTGGCAGAAGAG	59.218	0.52381	GCAACTGAATGAGAGCTTACCAT	59.803	0.434783	154
isoform_115398_12772_2	TCCTCCTCCTCCTCCTCC	TCC(3*6)	169	18	CTCCTTCAAGTGGCAGAAGAGCCCGCTGCCGCCTCCTCT[TCCTCCTCCTCCTCCTCC]GTCTCCCCCAAAAGCTAGCACACATGTACTACTACATCTGTACAGTACTCATTTGAGTGAGTATTTCTTACACAATGGTAAGCTCTCATTCAGTTGCCTC	CTCCTTCAAGTGGCAGAAGAG	59.218	0.52381	GAGGCAACTGAATGAGAGCTTAC	59.561	0.478261	157
isoform_115398_12772_3	TCCTCCTCCTCCTCCTCC	TCC(3*6)	169	18	CTTCAAGTGGCAGAAGAGCCCGCTGCCGCCTCCTCT[TCCTCCTCCTCCTCCTCC]GTCTCCCCCAAAAGCTAGCACACATGTACTACTACATCTGTACAGTACTCATTTGAGTGAGTATTTCTTACACAATGGTAAGCTCTCATTCAGTTGC	CTTCAAGTGGCAGAAGAGCC	60.134	0.55	GCAACTGAATGAGAGCTTACCAT	59.803	0.434783	151
isoform_115398_12772_4	TCCTCCTCCTCCTCCTCC	TCC(3*6)	169	18	CCTTCAAGTGGCAGAAGAGCCCGCTGCCGCCTCCTCT[TCCTCCTCCTCCTCCTCC]GTCTCCCCCAAAAGCTAGCACACATGTACTACTACATCTGTACAGTACTCATTTGAGTGAGTATTTCTTACACAATGGTAAGCTCTCATTCAGTTGC	CCTTCAAGTGGCAGAAGAGC	60.134	0.55	GCAACTGAATGAGAGCTTACCAT	59.803	0.434783	152
isoform_115398_12772_5	TCCTCCTCCTCCTCCTCC	TCC(3*6)	169	18	CTTCAAGTGGCAGAAGAGCCCGCTGCCGCCTCCTCT[TCCTCCTCCTCCTCCTCC]GTCTCCCCCAAAAGCTAGCACACATGTACTACTACATCTGTACAGTACTCATTTGAGTGAGTATTTCTTACACAATGGTAAGCTCTCATTCAGTTGCCTC	CTTCAAGTGGCAGAAGAGCC	60.134	0.55	GAGGCAACTGAATGAGAGCTTAC	59.561	0.478261	154
isoform_115432_12773_1	CTCTCTCTCTCTCTCTCT	CT(2*9)	245	18	CCCTTACCAATTGCAAACTACATCCTGCCAGCTTGAACGATGCGGTATCCCAGCAAAAAGCAGTCCACAGCAGCAGGGCG[CTCTCTCTCTCTCTCTCT]CGGCCGTCGATCTTGAGCTCAGATTTCAGTTCTGCGAAGAGAGA	CCCTTACCAATTGCAAACTACAT	59.341	0.391304	TCTCTCTTCGCAGAACTGAAATC	60.144	0.434783	142
isoform_115432_12773_2	CTCTCTCTCTCTCTCTCT	CT(2*9)	245	18	AGCCCTTACCAATTGCAAACTACATCCTGCCAGCTTGAACGATGCGGTATCCCAGCAAAAAGCAGTCCACAGCAGCAGGGCG[CTCTCTCTCTCTCTCTCT]CGGCCGTCGATCTTGAGCTCAGATTTCAGTTCTGCGAAGAGAGA	AGCCCTTACCAATTGCAAACTAC	60.733	0.434783	TCTCTCTTCGCAGAACTGAAATC	60.144	0.434783	144
isoform_115432_12773_3	CTCTCTCTCTCTCTCTCT	CT(2*9)	245	18	TACCAATTGCAAACTACATCCTGCCAGCTTGAACGATGCGGTATCCCAGCAAAAAGCAGTCCACAGCAGCAGGGCG[CTCTCTCTCTCTCTCTCT]CGGCCGTCGATCTTGAGCTCAGATTTCAGTTCTGCGAAGAGAGA	TACCAATTGCAAACTACATCCTG	59.065	0.391304	TCTCTCTTCGCAGAACTGAAATC	60.144	0.434783	138
isoform_115432_12773_4	CTCTCTCTCTCTCTCTCT	CT(2*9)	245	18	AGCCCTTACCAATTGCAAACTACATCCTGCCAGCTTGAACGATGCGGTATCCCAGCAAAAAGCAGTCCACAGCAGCAGGGCG[CTCTCTCTCTCTCTCTCT]CGGCCGTCGATCTTGAGCTCAGATTTCAGTTCTGCGAAGAGAGA	AGCCCTTACCAATTGCAAACTA	60.023	0.409091	TCTCTCTTCGCAGAACTGAAATC	60.144	0.434783	144
isoform_115432_12773_5	CTCTCTCTCTCTCTCTCT	CT(2*9)	245	18	GCCCTTACCAATTGCAAACTACATCCTGCCAGCTTGAACGATGCGGTATCCCAGCAAAAAGCAGTCCACAGCAGCAGGGCG[CTCTCTCTCTCTCTCTCT]CGGCCGTCGATCTTGAGCTCAGATTTCAGTTCTGCGAAGAGAGA	GCCCTTACCAATTGCAAACTAC	59.904	0.454545	TCTCTCTTCGCAGAACTGAAATC	60.144	0.434783	143
isoform_115889_12789_3	ACACACACACAC	AC(2*6)	375	12	CTTTATTGCAAAGAGGACACCAGATGCTAAGGAAACTT[ACACACACACAC]ATTGTTTTCATAGTTGGATTCCATCAACCGAGTCATATGTTATGGTTGATGGTTTGATCTATTGTCATATATTATTGGCATGGTTTTCACTTTGTTGCTTAGGA	CTTTATTGCAAAGAGGACACCAG	60.169	0.434783	TCCTAAGCAACAAAGTGAAAACC	59.695	0.391304	154
isoform_115936_12792_1	GAGAGAGAGAGA	GA(2*6)	242	12	GTTATCCCTTGGATGTTTGTGAAGTTGGCTCTCAGGTTGCTCACAGTGAAAGCTCCAAGGTGCTTGTGAAGGATGGCCCTTTGCATGATGATGCATTTGCATTTCG[GAGAGAGAGAGA]AAGCAGAAGATAAGTTTCTGGCATCGTAGGAAGTTTA	GTTATCCCTTGGATGTTTGTGAA	60.102	0.391304	TAAACTTCCTACGATGCCAGAAA	60.134	0.391304	155
isoform_115936_12792_4	GAGAGAGAGAGA	GA(2*6)	242	12	TTATCCCTTGGATGTTTGTGAAGTTGGCTCTCAGGTTGCTCACAGTGAAAGCTCCAAGGTGCTTGTGAAGGATGGCCCTTTGCATGATGATGCATTTGCATTTCG[GAGAGAGAGAGA]AAGCAGAAGATAAGTTTCTGGCATCGTAGGAAGTTTA	TTATCCCTTGGATGTTTGTGAAG	60.223	0.391304	TAAACTTCCTACGATGCCAGAAA	60.134	0.391304	154
isoform_116027_12795_1	CTCTCTCTCTCTCTCTCTCTCTCTCTCTCT	CT(2*15)	229	30	CCAGGTACTGGAGATCATGCTACACAAGCCATCGACCCTGCTGAGGCTCGAG[CTCTCTCTCTCTCTCTCTCTCTCTCTCTCT]CATCCCTCTTGAGTTTCTCTGTCTGTTCGTGGAG	CCAGGTACTGGAGATCATGCTAC	60.033	0.521739	CTCCACGAACAGACAGAGAAACT	59.967	0.478261	116
isoform_116027_12795_2	CTCTCTCTCTCTCTCTCTCTCTCTCTCTCT	CT(2*15)	229	30	ACCAGGTACTGGAGATCATGCTACACAAGCCATCGACCCTGCTGAGGCTCGAG[CTCTCTCTCTCTCTCTCTCTCTCTCTCTCT]CATCCCTCTTGAGTTTCTCTGTCTGTTCGTGGAG	ACCAGGTACTGGAGATCATGCTA	60.033	0.478261	CTCCACGAACAGACAGAGAAACT	59.967	0.478261	117
isoform_116027_12795_3	CTCTCTCTCTCTCTCTCTCTCTCTCTCTCT	CT(2*15)	229	30	CCAGGTACTGGAGATCATGCTACACAAGCCATCGACCCTGCTGAGGCTCGAG[CTCTCTCTCTCTCTCTCTCTCTCTCTCTCT]CATCCCTCTTGAGTTTCTCTGTCTG	CCAGGTACTGGAGATCATGCTAC	60.033	0.521739	CAGACAGAGAAACTCAAGAGGGA	60.038	0.478261	107
isoform_116027_12795_4	CTCTCTCTCTCTCTCTCTCTCTCTCTCTCT	CT(2*15)	229	30	ACCAGGTACTGGAGATCATGCTACACAAGCCATCGACCCTGCTGAGGCTCGAG[CTCTCTCTCTCTCTCTCTCTCTCTCTCTCT]CATCCCTCTTGAGTTTCTCTGTCTG	ACCAGGTACTGGAGATCATGCTA	60.033	0.478261	CAGACAGAGAAACTCAAGAGGGA	60.038	0.478261	108
isoform_116027_12795_5	CTCTCTCTCTCTCTCTCTCTCTCTCTCTCT	CT(2*15)	229	30	CCAGGTACTGGAGATCATGCTACACAAGCCATCGACCCTGCTGAGGCTCGAG[CTCTCTCTCTCTCTCTCTCTCTCTCTCTCT]CATCCCTCTTGAGTTTCTCTGTCTGTTCGTG	CCAGGTACTGGAGATCATGCTAC	60.033	0.521739	CACGAACAGACAGAGAAACTCAA	59.571	0.434783	113
isoform_116501_12806_3	TCTCTCTCTCTCTCTCTCTC	TC(2*10)	279	20	ATGCAAACTTGACAATTCATGTGCT[TCTCTCTCTCTCTCTCTCTC]ACGACACACGCACACACATGAGAGTCAATAACGGACATTTGCTCTACATACCTCACCCTAGACCCACT	ATGCAAACTTGACAATTCATGTG	59.919	0.347826	AGTGGGTCTAGGGTGAGGTATGT	60.177	0.521739	113
isoform_116501_12806_4	TCTCTCTCTCTCTCTCTCTC	TC(2*10)	279	20	ATGCAAACTTGACAATTCATGTGCT[TCTCTCTCTCTCTCTCTCTC]ACGACACACGCACACACATGAGAGTCAATAACGGACATTTGCTCTACATACC	ATGCAAACTTGACAATTCATGTG	59.919	0.347826	GGTATGTAGAGCAAATGTCCGTT	59.45	0.434783	97
isoform_11652_2293_1	ACACACACACACACACACAC	AC(2*10)	300	20	GAATTAAGCTGTGTAGAACCCCCCCCCCCCCCCCCCCCCCCCCCCCCGGCCCCCTTCTTCTCA[ACACACACACACACACACAC]AGGTGCATGCACACCCTTACGATCTCGGCTCCTCTTTGATCAAGCTTCCTGACAAGAGACCTTCATTGCCATATTGA	GAATTAAGCTGTGTAGAACCCCC	60.243	0.478261	TCAATATGGCAATGAAGGTCTCT	59.979	0.391304	160
isoform_11652_2293_2	ACACACACACACACACACAC	AC(2*10)	300	20	GAATTAAGCTGTGTAGAACCCCCCCCCCCCCCCCCCCCCCCCCCCCCGGCCCCCTTCTTCTCA[ACACACACACACACACACAC]AGGTGCATGCACACCCTTACGATCTCGGCTCCTCTTTGATCAAGCTTCCTGACAAGAGACCTTCATTGCCATATT	GAATTAAGCTGTGTAGAACCCCC	60.243	0.478261	AATATGGCAATGAAGGTCTCTTG	59.515	0.391304	158
isoform_11652_2293_3	ACACACACACACACACACAC	AC(2*10)	300	20	GAATTAAGCTGTGTAGAACCCCCCCCCCCCCCCCCCCCCCCCCCCCCGGCCCCCTTCTTCTCA[ACACACACACACACACACAC]AGGTGCATGCACACCCTTACGATCTCGGCTCCTCTTTGATCAAGCTTCCTGACAAGAGACCTTCATTGCCATATTG	GAATTAAGCTGTGTAGAACCCCC	60.243	0.478261	CAATATGGCAATGAAGGTCTCTT	59.515	0.391304	159
isoform_11652_2293_4	ACACACACACACACACACAC	AC(2*10)	300	20	GAATTAAGCTGTGTAGAACCCCCCCCCCCCCCCCCCCCCCCCCCCCCGGCCCCCTTCTTCTCA[ACACACACACACACACACAC]AGGTGCATGCACACCCTTACGATCTCGGCTCCTCTTTGATCAAGCTTCCTGACAAGAGACCTTCATTGCCATA	GAATTAAGCTGTGTAGAACCCCC	60.243	0.478261	TATGGCAATGAAGGTCTCTTGTC	60.497	0.434783	156
isoform_11652_2293_5	ACACACACACACACACACAC	AC(2*10)	300	20	GAATTAAGCTGTGTAGAACCCCCCCCCCCCCCCCCCCCCCCCCCCCCGGCCCCCTTCTTCTCA[ACACACACACACACACACAC]AGGTGCATGCACACCCTTACGATCTCGGCTCCTCTTTGATCAAGCTTCCTGACAAGAGACCTTCATTG	GAATTAAGCTGTGTAGAACCCCC	60.243	0.478261	CAATGAAGGTCTCTTGTCAGGAA	60.646	0.434783	151
isoform_116634_12809_1	CTCTCTCTCTCTCTCTCTCT	CT(2*10)	152	20	TTTGCCGATGACTACCTATGTTTATAGTGTTGAGTTTGGACATG[CTCTCTCTCTCTCTCTCTCT]TTCTCTCCCTCTCTCCCCCTCTCCCCTTACCCAGCTTCAGGTTCGTCTCATCGTTCTCAT	TTTGCCGATGACTACCTATGTTT	59.912	0.391304	ATGAGAACGATGAGACGAACCT	60.139	0.454545	124
isoform_116634_12809_2	CTCTCTCTCTCTCTCTCTCT	CT(2*10)	152	20	TTTTGCCGATGACTACCTATGTTTATAGTGTTGAGTTTGGACATG[CTCTCTCTCTCTCTCTCTCT]TTCTCTCCCTCTCTCCCCCTCTCCCCTTACCCAGCTTCAGGTTCGTCTCATCGTTCTCAT	TTTTGCCGATGACTACCTATGTT	59.912	0.391304	ATGAGAACGATGAGACGAACCT	60.139	0.454545	125
isoform_116634_12809_3	CTCTCTCTCTCTCTCTCTCT	CT(2*10)	152	20	CTGATACTCTTTTGCCGATGACTACCTATGTTTATAGTGTTGAGTTTGGACATG[CTCTCTCTCTCTCTCTCTCT]TTCTCTCCCTCTCTCCCCCTCTCCCCTTACCCAGCTTCAGGTTCGTCTCATCGTTCTCAT	CTGATACTCTTTTGCCGATGACT	59.797	0.434783	ATGAGAACGATGAGACGAACCT	60.139	0.454545	134
isoform_116634_12809_4	CTCTCTCTCTCTCTCTCTCT	CT(2*10)	152	20	TTTGCCGATGACTACCTATGTTTATAGTGTTGAGTTTGGACATG[CTCTCTCTCTCTCTCTCTCT]TTCTCTCCCTCTCTCCCCCTCTCCCCTTACCCAGCTTCAGGTTCGTCTCATCGTTCTCATCA	TTTGCCGATGACTACCTATGTTT	59.912	0.391304	TGATGAGAACGATGAGACGAAC	60.263	0.454545	126
isoform_116634_12809_5	CTCTCTCTCTCTCTCTCTCT	CT(2*10)	152	20	TTTGCCGATGACTACCTATGTTTATAGTGTTGAGTTTGGACATG[CTCTCTCTCTCTCTCTCTCT]TTCTCTCCCTCTCTCCCCCTCTCCCCTTACCCAGCTTCAGGTTCGTCTCATCGTTCTCATCAAC	TTTGCCGATGACTACCTATGTTT	59.912	0.391304	GTTGATGAGAACGATGAGACGA	60.263	0.454545	128
isoform_116676_12815_5	CTCTCTCTCTCTCTCTCTCTCTCTCTCTCTCT	CT(2*16)	191	32	GCGAGGATGTCTGTGATGTTATTGTTGGCCCTGGCGGGGCAGAGCAGAGAGAGGAGCAGGGCGCAAGCGAGGAGGGCGACCTTCATGGTGCTG[CTCTCTCTCTCTCTCTCTCTCTCTCTCTCTCT]CACGCACACACAGACACTCGGGAAG	GCGAGGATGTCTGTGATGTTATT	60.395	0.434783	CTTCCCGAGTGTCTGTGTGT	58.725	0.55	150
isoform_116727_12819_1	CTCTCTCTCTCTCTCTCTCTCTCTCTCTCTCTCTCTCTCTCTCTCTCT	CT(2*24)	192	48	GAGACGGGGGTGTTCTGTTGCGCAC[CTCTCTCTCTCTCTCTCTCTCTCTCTCTCTCTCTCTCTCTCTCTCTCT]GTGTGTGTGCTGCGACTTCAGCTGCGGATCTGCGGCCCTCTTGATGGGGTTTTTCTAAATTGCTACA	GAGACGGGGGTGTTCTGTT	59.953	0.578947	TGTAGCAATTTAGAAAAACCCCA	59.892	0.347826	140
isoform_116727_12819_2	CTCTCTCTCTCTCTCTCTCTCTCTCTCTCTCTCTCTCTCTCTCTCTCT	CT(2*24)	192	48	GAGACGGGGGTGTTCTGTTGCGCAC[CTCTCTCTCTCTCTCTCTCTCTCTCTCTCTCTCTCTCTCTCTCTCTCT]GTGTGTGTGCTGCGACTTCAGCTGCGGATCTGCGGCCCTCTTGATGGGGTTTTTCTAAATTGCTACACCCTATTGTTGGTG	GAGACGGGGGTGTTCTGTT	59.953	0.578947	CACCAACAATAGGGTGTAGCAAT	60.176	0.434783	154
isoform_116727_12819_3	CTCTCTCTCTCTCTCTCTCTCTCTCTCTCTCTCTCTCTCTCTCTCTCT	CT(2*24)	192	48	GAGACGGGGGTGTTCTGTTGCGCAC[CTCTCTCTCTCTCTCTCTCTCTCTCTCTCTCTCTCTCTCTCTCTCTCT]GTGTGTGTGCTGCGACTTCAGCTGCGGATCTGCGGCCCTCTTGATGGGGTTTTTCTAAATTGCTACACCCTATTGTTGGTGTA	GAGACGGGGGTGTTCTGTT	59.953	0.578947	TACACCAACAATAGGGTGTAGCA	59.455	0.434783	156
isoform_116727_12819_4	CTCTCTCTCTCTCTCTCTCTCTCTCTCTCTCTCTCTCTCTCTCTCTCT	CT(2*24)	192	48	GAGACGGGGGTGTTCTGTTGCGCAC[CTCTCTCTCTCTCTCTCTCTCTCTCTCTCTCTCTCTCTCTCTCTCTCT]GTGTGTGTGCTGCGACTTCAGCTGCGGATCTGCGGCCCTCTTGATGGGGTTTTTCTAAA	GAGACGGGGGTGTTCTGTT	59.953	0.578947	TTTAGAAAAACCCCATCAAGAGG	60.654	0.391304	132
isoform_116727_12819_5	CTCTCTCTCTCTCTCTCTCTCTCTCTCTCTCTCTCTCTCTCTCTCTCT	CT(2*24)	192	48	GAGACGGGGGTGTTCTGTTGCGCAC[CTCTCTCTCTCTCTCTCTCTCTCTCTCTCTCTCTCTCTCTCTCTCTCT]GTGTGTGTGCTGCGACTTCAGCTGCGGATCTGCGGCCCTCTTGATGGGGTTTTTCTAAATTGCTACACCCTATTGTTGG	GAGACGGGGGTGTTCTGTT	59.953	0.578947	CCAACAATAGGGTGTAGCAATTT	59.341	0.391304	152
isoform_116859_12827_1	CTCTCTCTCTCTCTCTCTCTCTCTCTCTCTCTCTCTCTCT	CT(2*20)	210	40	GATGGGTTTGATGAGCCTCTATTGGCGATGGCCTGGAGCGACTCTCCCC[CTCTCTCTCTCTCTCTCTCTCTCTCTCTCTCTCTCTCTCT]GTGCGCGTTCTCAGCAGGAGCGAATCTCACAAGGTTTAATG	GATGGGTTTGATGAGCCTCTATT	60.679	0.434783	CATTAAACCTTGTGAGATTCGCT	59.68	0.391304	130
isoform_116859_12827_2	CTCTCTCTCTCTCTCTCTCTCTCTCTCTCTCTCTCTCTCT	CT(2*20)	210	40	GATGGGTTTGATGAGCCTCTATTGGCGATGGCCTGGAGCGACTCTCCCC[CTCTCTCTCTCTCTCTCTCTCTCTCTCTCTCTCTCTCTCT]GTGCGCGTTCTCAGCAGGAGCGAATCTCACAAGGTTTAATGATTCAGCA	GATGGGTTTGATGAGCCTCTATT	60.679	0.434783	TGCTGAATCATTAAACCTTGTGA	59.639	0.347826	138
isoform_116859_12827_3	CTCTCTCTCTCTCTCTCTCTCTCTCTCTCTCTCTCTCTCT	CT(2*20)	210	40	GATGGGTTTGATGAGCCTCTATTGGCGATGGCCTGGAGCGACTCTCCCC[CTCTCTCTCTCTCTCTCTCTCTCTCTCTCTCTCTCTCTCT]GTGCGCGTTCTCAGCAGGAGCGAATCTCACAAGGTTTAATGA	GATGGGTTTGATGAGCCTCTATT	60.679	0.434783	TCATTAAACCTTGTGAGATTCGC	60.484	0.391304	131
isoform_116859_12827_4	CTCTCTCTCTCTCTCTCTCTCTCTCTCTCTCTCTCTCTCT	CT(2*20)	210	40	GATGGGTTTGATGAGCCTCTATTGGCGATGGCCTGGAGCGACTCTCCCC[CTCTCTCTCTCTCTCTCTCTCTCTCTCTCTCTCTCTCTCT]GTGCGCGTTCTCAGCAGGAGCGAATCTCACAAGGTTTAATGATTCAGCAT	GATGGGTTTGATGAGCCTCTATT	60.679	0.434783	ATGCTGAATCATTAAACCTTGTGA	59.904	0.333333	139
isoform_116859_12827_5	CTCTCTCTCTCTCTCTCTCTCTCTCTCTCTCTCTCTCTCT	CT(2*20)	210	40	GATGGGTTTGATGAGCCTCTATTGGCGATGGCCTGGAGCGACTCTCCCC[CTCTCTCTCTCTCTCTCTCTCTCTCTCTCTCTCTCTCTCT]GTGCGCGTTCTCAGCAGGAGCGAATCTCACAAGGTTTAAT	GATGGGTTTGATGAGCCTCTATT	60.679	0.434783	ATTAAACCTTGTGAGATTCGCTC	58.837	0.391304	129
isoform_117151_12837_1	CTCCTCCTCCTCCTCCTCCTC	CTC(3*7)	155	21	GGTTCTGTGAAGAAGAGCATCATTACCTCTATCTT[CTCCTCCTCCTCCTCCTCCTC]TGCGCCGCCACCCTCCCCCCCACCCAATTAACCAGGTT	GGTTCTGTGAAGAAGAGCATCAT	59.771	0.434783	AACCTGGTTAATTGGGTGGG	60.826	0.5	94
isoform_117151_12837_2	CTCCTCCTCCTCCTCCTCCTC	CTC(3*7)	155	21	GGTTCTGTGAAGAAGAGCATCATTACCTCTATCTT[CTCCTCCTCCTCCTCCTCCTC]TGCGCCGCCACCCTCCCCCCCACCCAATTAACCAGGT	GGTTCTGTGAAGAAGAGCATCAT	59.771	0.434783	ACCTGGTTAATTGGGTGGG	59.512	0.526316	93
isoform_117151_12837_3	CTCCTCCTCCTCCTCCTCCTC	CTC(3*7)	155	21	TGTGAAGAAGAGCATCATTACCTCTATCTT[CTCCTCCTCCTCCTCCTCCTC]TGCGCCGCCACCCTCCCCCCCACCCAATTAACCAGGTT	TGTGAAGAAGAGCATCATTACCTC	59.789	0.416667	AACCTGGTTAATTGGGTGGG	60.826	0.5	89
isoform_117151_12837_4	CTCCTCCTCCTCCTCCTCCTC	CTC(3*7)	155	21	TCTGTGAAGAAGAGCATCATTACCTCTATCTT[CTCCTCCTCCTCCTCCTCCTC]TGCGCCGCCACCCTCCCCCCCACCCAATTAACCAGGTT	TCTGTGAAGAAGAGCATCATTACC	59.789	0.416667	AACCTGGTTAATTGGGTGGG	60.826	0.5	91
isoform_117151_12837_5	CTCCTCCTCCTCCTCCTCCTC	CTC(3*7)	155	21	ACGGTTCTGTGAAGAAGAGCATCATTACCTCTATCTT[CTCCTCCTCCTCCTCCTCCTC]TGCGCCGCCACCCTCCCCCCCACCCAATTAACCAGGTT	ACGGTTCTGTGAAGAAGAGCAT	60.31	0.454545	AACCTGGTTAATTGGGTGGG	60.826	0.5	96
isoform_117597_12852_1	GAGAGAGAGAGAGAGAGAGAGAGA	GA(2*12)	239	24	TAACTCACTAGGCCACCTCTACGACCTCAACTTCTTTCCTTTGAGACATTGCAAGTAAGAT[GAGAGAGAGAGAGAGAGAGAGAGA]TGTTCTGTACTATTGATGGTGAGGAGGGGAAGAGTCTCCCCCTCCCTGTAACCCACAAGTTATG	TAACTCACTAGGCCACCTCTACG	59.848	0.521739	CATAACTTGTGGGTTACAGGGAG	59.806	0.478261	149
isoform_117597_12852_2	GAGAGAGAGAGAGAGAGAGAGAGA	GA(2*12)	239	24	TAACTCACTAGGCCACCTCTACGACCTCAACTTCTTTCCTTTGAGACATTGCAAGTAAGAT[GAGAGAGAGAGAGAGAGAGAGAGA]TGTTCTGTACTATTGATGGTGAGGAGGG	TAACTCACTAGGCCACCTCTACG	59.848	0.521739	CCCTCCTCACCATCAATAGTACA	60.248	0.478261	113
isoform_117597_12852_4	GAGAGAGAGAGAGAGAGAGAGAGA	GA(2*12)	239	24	CCATAACTCACTAGGCCACCTCTACGACCTCAACTTCTTTCCTTTGAGACATTGCAAGTAAGAT[GAGAGAGAGAGAGAGAGAGAGAGA]TGTTCTGTACTATTGATGGTGAGGAGGGGAAGAGTCTCCCCCTCCCTGTAACCCACAAGTTATG	CCATAACTCACTAGGCCACCTCT	60.89	0.521739	CATAACTTGTGGGTTACAGGGAG	59.806	0.478261	152
isoform_117597_12852_5	GAGAGAGAGAGAGAGAGAGAGAGA	GA(2*12)	239	24	CCATAACTCACTAGGCCACCTCTACGACCTCAACTTCTTTCCTTTGAGACATTGCAAGTAAGAT[GAGAGAGAGAGAGAGAGAGAGAGA]TGTTCTGTACTATTGATGGTGAGGAGGG	CCATAACTCACTAGGCCACCTCT	60.89	0.521739	CCCTCCTCACCATCAATAGTACA	60.248	0.478261	116
isoform_117797_12856_2	GAGAGAGAGAGAGAGA	GA(2*8)	167	16	TTTTAGCTAGAACGAAGTTCGGGGTTTAAGGCCTGTCAATTTCCCCTGTGAGCGAGAGTGTGTTTGAGAGAGAAAGAGAGAGGGGGTGTGTGCTTGCGTGTGTGTGT[GAGAGAGAGAGAGAGA]AGAGGGAGAGATGCTGCTTTCTAT	TTTTAGCTAGAACGAAGTTCGGG	61.047	0.434783	ATAGAAAGCAGCATCTCTCCCTC	60.362	0.478261	147
isoform_117797_12856_3	GAGAGAGAGAGAGAGA	GA(2*8)	167	16	TTTAGCTAGAACGAAGTTCGGGGTTTAAGGCCTGTCAATTTCCCCTGTGAGCGAGAGTGTGTTTGAGAGAGAAAGAGAGAGGGGGTGTGTGCTTGCGTGTGTGTGT[GAGAGAGAGAGAGAGA]AGAGGGAGAGATGCTGCTTTCTAT	TTTAGCTAGAACGAAGTTCGGG	59.913	0.454545	ATAGAAAGCAGCATCTCTCCCTC	60.362	0.478261	146
isoform_11797_2322_1	CTCTCTCTCTCTCT	CT(2*7)	203	14	GTGATTCTCAGTTTTGTGGACCTCTCGAATCCCCCTCCCCCCCCCCCCCCCCCCTCCCTCTCGTGCTGTTTGTGTGAAGGACGCTTTGCTCTCCTTCCACACTTTGGTATG[CTCTCTCTCTCTCT]GCCCCTATCTCCTGTTCTACTCCATCTCTGC	GTGATTCTCAGTTTTGTGGACCT	59.538	0.434783	GCAGAGATGGAGTAGAACAGGAG	59.538	0.521739	156
isoform_11797_2322_2	CTCTCTCTCTCTCT	CT(2*7)	203	14	TGATTCTCAGTTTTGTGGACCTCTCGAATCCCCCTCCCCCCCCCCCCCCCCCCTCCCTCTCGTGCTGTTTGTGTGAAGGACGCTTTGCTCTCCTTCCACACTTTGGTATG[CTCTCTCTCTCTCT]GCCCCTATCTCCTGTTCTACTCCATCTCTGC	TGATTCTCAGTTTTGTGGACCTC	60.522	0.434783	GCAGAGATGGAGTAGAACAGGAG	59.538	0.521739	155
isoform_11797_2322_3	CTCTCTCTCTCTCT	CT(2*7)	203	14	GCTCTCCTTCCACACTTTGGTATG[CTCTCTCTCTCTCT]GCCCCTATCTCCTGTTCTACTCCATCTCTGCCGGCAGTGCTCGAGCTCTCTTATTCTTCTGGTCTGCGTGT	GCTCTCCTTCCACACTTTGGTAT	60.881	0.478261	ACACGCAGACCAGAAGAATAAGA	60.309	0.434783	109
isoform_11797_2322_4	CTCTCTCTCTCTCT	CT(2*7)	203	14	GCTCTCCTTCCACACTTTGGTATG[CTCTCTCTCTCTCT]GCCCCTATCTCCTGTTCTACTCCATCTCTGCCGGCAGTGCTCGAGCTCTCTTATTCTTCTGGTCTGCGTGTC	GCTCTCCTTCCACACTTTGGTAT	60.881	0.478261	GACACGCAGACCAGAAGAATAAG	60.309	0.478261	110
isoform_11797_2322_5	CTCTCTCTCTCTCT	CT(2*7)	203	14	GCTCTCCTTCCACACTTTGGTATG[CTCTCTCTCTCTCT]GCCCCTATCTCCTGTTCTACTCCATCTCTGCCGGCAGTGCTCGAGCTCTCTTATTCTTCTGGTCTGCGTGTCT	GCTCTCCTTCCACACTTTGGTAT	60.881	0.478261	AGACACGCAGACCAGAAGAATAA	60.309	0.434783	111
isoform_118134_12864_1	GAGAGAGAGAGAGAGAGAGAGA	GA(2*11)	225	22	CATAGGAGAGTCGTCCCACAGGAAGCCCCAGGCGACTGCTCGCACAGGAGCCTCGGTGCCGCAGGCTGAAGCCATCGCGAGTCG[GAGAGAGAGAGAGAGAGAGAGA]ATGTGGCGAAGCAGAGGAGGAGAGAGGAGTGAGAGAGCAAGAACAA	CATAGGAGAGTCGTCCCACAG	59.73	0.571429	TTGTTCTTGCTCTCTCACTCCTC	60.181	0.478261	152
isoform_118134_12864_2	GAGAGAGAGAGAGAGAGAGAGA	GA(2*11)	225	22	CATAGGAGAGTCGTCCCACAGGAAGCCCCAGGCGACTGCTCGCACAGGAGCCTCGGTGCCGCAGGCTGAAGCCATCGCGAGTCG[GAGAGAGAGAGAGAGAGAGAGA]ATGTGGCGAAGCAGAGGAGGAGAGAGGAGTGAGAGAGCAAGAACAAGA	CATAGGAGAGTCGTCCCACAG	59.73	0.571429	TCTTGTTCTTGCTCTCTCACTCC	60.181	0.478261	154
isoform_118134_12864_3	GAGAGAGAGAGAGAGAGAGAGA	GA(2*11)	225	22	CATAGGAGAGTCGTCCCACAGGAAGCCCCAGGCGACTGCTCGCACAGGAGCCTCGGTGCCGCAGGCTGAAGCCATCGCGAGTCG[GAGAGAGAGAGAGAGAGAGAGA]ATGTGGCGAAGCAGAGGAGGAGAGAGGAGTGAGAGAGCAAGAACA	CATAGGAGAGTCGTCCCACAG	59.73	0.571429	TGTTCTTGCTCTCTCACTCCTCT	59.815	0.478261	151
isoform_118134_12864_4	GAGAGAGAGAGAGAGAGAGAGA	GA(2*11)	225	22	CATAGGAGAGTCGTCCCACAGGAAGCCCCAGGCGACTGCTCGCACAGGAGCCTCGGTGCCGCAGGCTGAAGCCATCGCGAGTCG[GAGAGAGAGAGAGAGAGAGAGA]ATGTGGCGAAGCAGAGGAGGAGAGAGGAGTGAGAG	CATAGGAGAGTCGTCCCACAG	59.73	0.571429	CTCTCACTCCTCTCTCCTCCTCT	59.775	0.565217	141
isoform_118134_12864_5	GAGAGAGAGAGAGAGAGAGAGA	GA(2*11)	225	22	CATAGGAGAGTCGTCCCACAGGAAGCCCCAGGCGACTGCTCGCACAGGAGCCTCGGTGCCGCAGGCTGAAGCCATCGCGAGTCG[GAGAGAGAGAGAGAGAGAGAGA]ATGTGGCGAAGCAGAGGAGGAGAGAGGAGTGAGAGAG	CATAGGAGAGTCGTCCCACAG	59.73	0.571429	CTCTCTCACTCCTCTCTCCTCCT	59.775	0.565217	143
isoform_118169_12865_5	TCTCTCTCTCTCTCTCTCTCTCTCTCTC	TC(2*14)	295	28	CAATTCGAAACTCTACCTGCATCTTTATGCA[TCTCTCTCTCTCTCTCTCTCTCTCTCTC]TAGAGTATCCATGAGAATCTCACTCCAGGAACGCTTTGCAAGTGAATGGCTAGGCTCAC	CAATTCGAAACTCTACCTGCATC	60.143	0.434783	GTGAGCCTAGCCATTCACTTG	59.89	0.52381	118
isoform_118317_12875_1	CTCTCTCTCTCTCTCTCTCTCTCTCT	CT(2*13)	187	26	GTGAGAATATGGGAGGGTGGTGGTGGTTCCCTCCCGCTGCATGGAGGGCGCTGCTGCTGGCTCTCTGCGTCTGCCGCCACCTCTCCATCTGCCACGTCCCGCGCGCG[CTCTCTCTCTCTCTCTCTCTCTCTCT]CATTTTGTACTCTCAGCATCCCC	GTGAGAATATGGGAGGGTGGT	60.067	0.52381	GGGGATGCTGAGAGTACAAAAT	59.487	0.454545	156
isoform_118317_12875_2	CTCTCTCTCTCTCTCTCTCTCTCTCT	CT(2*13)	187	26	GTGGTGAGAATATGGGAGGGTGGTGGTGGTTCCCTCCCGCTGCATGGAGGGCGCTGCTGCTGGCTCTCTGCGTCTGCCGCCACCTCTCCATCTGCCACGTCCCGCGCGCG[CTCTCTCTCTCTCTCTCTCTCTCTCT]CATTTTGTACTCTCAGCATCCCC	GTGGTGAGAATATGGGAGGGT	60.067	0.52381	GGGGATGCTGAGAGTACAAAAT	59.487	0.454545	159
isoform_118317_12875_3	CTCTCTCTCTCTCTCTCTCTCTCTCT	CT(2*13)	187	26	GTGAGAATATGGGAGGGTGGTGGTGGTTCCCTCCCGCTGCATGGAGGGCGCTGCTGCTGGCTCTCTGCGTCTGCCGCCACCTCTCCATCTGCCACGTCCCGCGCGCG[CTCTCTCTCTCTCTCTCTCTCTCTCT]CATTTTGTACTCTCAGCATCCCCAT	GTGAGAATATGGGAGGGTGGT	60.067	0.52381	ATGGGGATGCTGAGAGTACAAA	60.875	0.454545	158
isoform_118317_12875_4	CTCTCTCTCTCTCTCTCTCTCTCTCT	CT(2*13)	187	26	GTGAGAATATGGGAGGGTGGTGGTGGTTCCCTCCCGCTGCATGGAGGGCGCTGCTGCTGGCTCTCTGCGTCTGCCGCCACCTCTCCATCTGCCACGTCCCGCGCGCG[CTCTCTCTCTCTCTCTCTCTCTCTCT]CATTTTGTACTCTCAGCATCCCCATT	GTGAGAATATGGGAGGGTGGT	60.067	0.52381	AATGGGGATGCTGAGAGTACAA	60.875	0.454545	159
isoform_118317_12875_5	CTCTCTCTCTCTCTCTCTCTCTCTCT	CT(2*13)	187	26	GTGAGAATATGGGAGGGTGGTGGTGGTTCCCTCCCGCTGCATGGAGGGCGCTGCTGCTGGCTCTCTGCGTCTGCCGCCACCTCTCCATCTGCCACGTCCCGCGCGCG[CTCTCTCTCTCTCTCTCTCTCTCTCT]CATTTTGTACTCTCAGCATCCCCA	GTGAGAATATGGGAGGGTGGT	60.067	0.52381	TGGGGATGCTGAGAGTACAAAAT	62.054	0.434783	157
isoform_118317_12876_1	GTGTGTGTGTGTGTGTGTGTGTGT	GT(2*12)	294	24	TGTGTTCTTTTCTGAGTTCCTCC[GTGTGTGTGTGTGTGTGTGTGTGT]GCATGCTTGCAAGAGTTTAGAGCTCTCATCTCTTCAGGGCAAGAGCTTCATCATTGTCGTGCCTTTTGTGCTGCTGAAGCTACAC	TGTGTTCTTTTCTGAGTTCCTCC	59.781	0.434783	GTGTAGCTTCAGCAGCACAAAAG	61.477	0.478261	132
isoform_118317_12876_2	GTGTGTGTGTGTGTGTGTGTGTGT	GT(2*12)	294	24	TGTGTTCTTTTCTGAGTTCCTCC[GTGTGTGTGTGTGTGTGTGTGTGT]GCATGCTTGCAAGAGTTTAGAGCTCTCATCTCTTCAGGGCAAGAGCTTCATCATTGTCGTGCCTTTTGTGCTGCTGAAGCTACAC	TGTGTTCTTTTCTGAGTTCCTCC	59.781	0.434783	GTGTAGCTTCAGCAGCACAAAA	60.615	0.454545	132
isoform_118317_12876_3	GTGTGTGTGTGTGTGTGTGTGTGT	GT(2*12)	294	24	TGTGTTCTTTTCTGAGTTCCTCC[GTGTGTGTGTGTGTGTGTGTGTGT]GCATGCTTGCAAGAGTTTAGAGCTCTCATCTCTTCAGGGCAAGAGCTTCATCATTGTCGTGCCTTTTGTGCTGCTGAAGCTACA	TGTGTTCTTTTCTGAGTTCCTCC	59.781	0.434783	TGTAGCTTCAGCAGCACAAAAG	60.739	0.454545	131
isoform_118317_12876_4	GTGTGTGTGTGTGTGTGTGTGTGT	GT(2*12)	294	24	TGTGTTCTTTTCTGAGTTCCTCC[GTGTGTGTGTGTGTGTGTGTGTGT]GCATGCTTGCAAGAGTTTAGAGCTCTCATCTCTTCAGGGCAAGAGCTTCATCATTGTCGTG	TGTGTTCTTTTCTGAGTTCCTCC	59.781	0.434783	CACGACAATGATGAAGCTCTTG	60.827	0.454545	108
isoform_118317_12876_5	GTGTGTGTGTGTGTGTGTGTGTGT	GT(2*12)	294	24	TGTGTTCTTTTCTGAGTTCCTCC[GTGTGTGTGTGTGTGTGTGTGTGT]GCATGCTTGCAAGAGTTTAGAGCTCTCATCTCTTCAGGGCAAGAG	TGTGTTCTTTTCTGAGTTCCTCC	59.781	0.434783	CTCTTGCCCTGAAGAGATGAGAG	61.889	0.521739	92
isoform_11837_2328_1	CTCTCTCTCTCT	CT(2*6)	206	12	ATTGATAAAACAAGCAGGAGCAC[CTCTCTCTCTCT]GCTCTACTCCCTCTCCATCTCTCATCTCCTCCCTACTCTCTCCTC	ATTGATAAAACAAGCAGGAGCAC	59.685	0.391304	GAGGAGAGAGTAGGGAGGAGATG	59.859	0.565217	80
isoform_11837_2328_2	CTCTCTCTCTCT	CT(2*6)	206	12	GCTCTACTCTGTAGGAATGGCTGTCTTCCGAGCACCTGCTTTTGATTGATAAAACAAGCAGGAGCAC[CTCTCTCTCTCT]GCTCTACTCCCTCTCCATCTCTCATCTCCTCCCTACT	GCTCTACTCTGTAGGAATGGCTG	59.578	0.521739	AGTAGGGAGGAGATGAGAGATGG	60.102	0.521739	116
isoform_11837_2328_3	CTCTCTCTCTCT	CT(2*6)	206	12	GCTCTACTCTGTAGGAATGGCTGTCTTCCGAGCACCTGCTTTTGATTGATAAAACAAGCAGGAGCAC[CTCTCTCTCTCT]GCTCTACTCCCTCTCCATCTCTCATCTCCTCCCTACTCTCTCC	GCTCTACTCTGTAGGAATGGCTG	59.578	0.521739	GGAGAGAGTAGGGAGGAGATGAG	59.859	0.565217	122
isoform_11837_2328_4	CTCTCTCTCTCT	CT(2*6)	206	12	GCTCTACTCTGTAGGAATGGCTGTCTTCCGAGCACCTGCTTTTGATTGATAAAACAAGCAGGAGCAC[CTCTCTCTCTCT]GCTCTACTCCCTCTCCATCTCTCATCTCCTCCCTACTCTCTCCT	GCTCTACTCTGTAGGAATGGCTG	59.578	0.521739	AGGAGAGAGTAGGGAGGAGATGA	59.859	0.521739	123
isoform_11837_2328_5	CTCTCTCTCTCT	CT(2*6)	206	12	GCTCTACTCTGTAGGAATGGCTGTCTTCCGAGCACCTGCTTTTGATTGATAAAACAAGCAGGAGCAC[CTCTCTCTCTCT]GCTCTACTCCCTCTCCATCTCTCATCTCCTCCCTACTCTCTCCTC	GCTCTACTCTGTAGGAATGGCTG	59.578	0.521739	GAGGAGAGAGTAGGGAGGAGATG	59.859	0.565217	124
isoform_11848_2331_4	GATGATGATGATGAT	GAT(3*5)	2032	15	GACCTCAGTGATGAGGAAGAAGAGGTATGCTATTTTTGAACAA[GATGATGATGATGAT]GAATGATCTCCTTGTCTTCTTCCAATCTCC	GACCTCAGTGATGAGGAAGAAGA	59.87	0.478261	GGAGATTGGAAGAAGACAAGGAG	60.591	0.478261	88
isoform_118488_12888_1	AGAAGAAGAAGAAGAAGA	AGA(3*6)	288	18	GAGGACGATTACTCCACTGACACAGATTCAGAAGATGATGAATTGGACAATAAGGTAGATGCAGAGAAGCC[AGAAGAAGAAGAAGAAGA]GAACTTCGAAGAAGAATTTAAGAAAAAACTTGAGAAGAGAACCGAAGAAGAGTCCAG	GAGGACGATTACTCCACTGACAC	60.052	0.521739	CTGGACTCTTCTTCGGTTCTCTT	60.406	0.478261	146
isoform_118598_12895_2	CTCTCTCTCTCTCTCTCTCTCTCTCTCTCTCTCTCTCTCTCTCTCTCTCTCTCT	CT(2*27)	210	54	GGAGGGGAGTCAGGGGACGCC[CTCTCTCTCTCTCTCTCTCTCTCTCTCTCTCTCTCTCTCTCTCTCTCTCTCTCT]GCAGATCTGCAGTTTGACGGTTCCTGCGCACATGCCAGCAAGTGAACGCTGATTCATGCAGGGAGATATTGAA	GGAGGGGAGTCAGGGGAC	61.875	0.722222	TTCAATATCTCCCTGCATGAATC	60.294	0.391304	148
isoform_118795_12901_1	GCAGGTGCAGGTGCAGGTGCAGGT	GCAGGT(6*4)	172	24	GTACTGCTCTCATCATACGCTGCAGCCGC[GCAGGTGCAGGTGCAGGTGCAGGT]GGAGCCTCTGATCACGCCCACATTTTAAGCGTCACGAACGAT	GTACTGCTCTCATCATACGCTGC	61.334	0.521739	ATCGTTCGTGACGCTTAAAATGT	62.038	0.391304	95
isoform_118795_12901_2	GCAGGTGCAGGTGCAGGTGCAGGT	GCAGGT(6*4)	172	24	CCATGGTATGTACTGCTCTCATCATACGCTGCAGCCGC[GCAGGTGCAGGTGCAGGTGCAGGT]GGAGCCTCTGATCACGCCCACATTTTAAGCGTCACGAACGAT	CCATGGTATGTACTGCTCTCATC	58.617	0.478261	ATCGTTCGTGACGCTTAAAATGT	62.038	0.391304	104
isoform_118795_12901_3	GCAGGTGCAGGTGCAGGTGCAGGT	GCAGGT(6*4)	172	24	GTACTGCTCTCATCATACGCTGCAGCCGC[GCAGGTGCAGGTGCAGGTGCAGGT]GGAGCCTCTGATCACGCCCACATTTTAAGCGTCACGAACG	GTACTGCTCTCATCATACGCTGC	61.334	0.521739	CGTTCGTGACGCTTAAAATGT	60.18	0.428571	93
isoform_118795_12901_4	GCAGGTGCAGGTGCAGGTGCAGGT	GCAGGT(6*4)	172	24	CCATGGTATGTACTGCTCTCATCATACGCTGCAGCCGC[GCAGGTGCAGGTGCAGGTGCAGGT]GGAGCCTCTGATCACGCCCACATTTTAAGCGTCACGAACG	CCATGGTATGTACTGCTCTCATC	58.617	0.478261	CGTTCGTGACGCTTAAAATGT	60.18	0.428571	102
isoform_118795_12901_5	GCAGGTGCAGGTGCAGGTGCAGGT	GCAGGT(6*4)	172	24	ACCATGGTATGTACTGCTCTCATCATACGCTGCAGCCGC[GCAGGTGCAGGTGCAGGTGCAGGT]GGAGCCTCTGATCACGCCCACATTTTAAGCGTCACGAACGAT	ACCATGGTATGTACTGCTCTCATC	59.442	0.458333	ATCGTTCGTGACGCTTAAAATGT	62.038	0.391304	105
isoform_118980_12906_1	CTCTCTCTCTCT	CT(2*6)	161	12	CTGCACTACTCCTTCTCTTCCAC[CTCTCTCTCTCT]TAGAAGAGGCTCTGTGCTTTCGAGCACCCAGCACCGTTTGAGTTGGACAAGGTGGGCGGTCGCACAACAGGCTCTCCTGTCGATCCAGGCCATGGGGGTGCCGCAAATGAGGCGTACAAGAAC	CTGCACTACTCCTTCTCTTCCAC	59.578	0.521739	GTTCTTGTACGCCTCATTTGC	59.766	0.47619	158
isoform_118980_12906_3	CTCTCTCTCTCT	CT(2*6)	161	12	CTGCACTACTCCTTCTCTTCCAC[CTCTCTCTCTCT]TAGAAGAGGCTCTGTGCTTTCGAGCACCCAGCACCGTTTGAGTTGGACAAGGTGGGCGGTCGCACAACAGGCTCTCCTGTCGATCCAGGCCATGGGGGTGCCGCAAATGAGGCGTACAAGAACG	CTGCACTACTCCTTCTCTTCCAC	59.578	0.521739	CGTTCTTGTACGCCTCATTTG	60.674	0.47619	159
isoform_11915_2343_2	AGAGAGAGAGAGAGAG	AG(2*8)	236	16	GGCTGTTGCAGATAAAATCAGAGACATTTGAACTTCGATGGGCTCCATTCCCTTGCCATCACCAACCTTATTGCATCGTGTTCCGCATCCCCTGGGTAAGA[AGAGAGAGAGAGAGAG]TGAACACCGCCACCCAGTATCAATGTCAACACT	GGCTGTTGCAGATAAAATCAGAG	60.27	0.434783	AGTGTTGACATTGATACTGGGTG	58.901	0.434783	150
isoform_11915_2343_3	AGAGAGAGAGAGAGAG	AG(2*8)	236	16	GGCTGTTGCAGATAAAATCAGAGACATTTGAACTTCGATGGGCTCCATTCCCTTGCCATCACCAACCTTATTGCATCGTGTTCCGCATCCCCTGGGTAAGA[AGAGAGAGAGAGAGAG]TGAACACCGCCACCCAGTATCAATGTCAACACTG	GGCTGTTGCAGATAAAATCAGAG	60.27	0.434783	CAGTGTTGACATTGATACTGGGT	58.901	0.434783	151
isoform_11915_2343_5	AGAGAGAGAGAGAGAG	AG(2*8)	236	16	AGGCTGTTGCAGATAAAATCAGAGACATTTGAACTTCGATGGGCTCCATTCCCTTGCCATCACCAACCTTATTGCATCGTGTTCCGCATCCCCTGGGTAAGA[AGAGAGAGAGAGAGAG]TGAACACCGCCACCCAGTATCAATGTCAACACT	AGGCTGTTGCAGATAAAATCAGA	60.27	0.391304	AGTGTTGACATTGATACTGGGTG	58.901	0.434783	151
isoform_11915_2344_1	GTGTGTGTGTGT	GT(2*6)	361	12	GCTACACATGCTCCTTTCTTCACTCGCACCAAAAGCGAGCTACTGCTGG[GTGTGTGTGTGT]GCCCGCACACACTGCTGTGTAATTTGTATGTTGTCTTGCACATGTAGCATTTGCCTCATAGGGACAGCTTAGACATCAAGC	GCTACACATGCTCCTTTCTTCAC	60.317	0.478261	GCTTGATGTCTAAGCTGTCCCTA	59.926	0.478261	142
isoform_11915_2344_3	GTGTGTGTGTGT	GT(2*6)	361	12	AGCTACACATGCTCCTTTCTTCACTCGCACCAAAAGCGAGCTACTGCTGG[GTGTGTGTGTGT]GCCCGCACACACTGCTGTGTAATTTGTATGTTGTCTTGCACATGTAGCATTTGCCTCATAGGGACAGCTTAGACATCAAGC	AGCTACACATGCTCCTTTCTTCA	60.438	0.434783	GCTTGATGTCTAAGCTGTCCCTA	59.926	0.478261	143
isoform_11915_2344_4	GTGTGTGTGTGT	GT(2*6)	361	12	GAGCTACACATGCTCCTTTCTTCACTCGCACCAAAAGCGAGCTACTGCTGG[GTGTGTGTGTGT]GCCCGCACACACTGCTGTGTAATTTGTATGTTGTCTTGCACATGTAGCATTTGCCTCATAGGGACAGCTTAGACATCAAGC	GAGCTACACATGCTCCTTTCTTC	59.561	0.478261	GCTTGATGTCTAAGCTGTCCCTA	59.926	0.478261	144
isoform_119282_12915_1	TCTCTCTCTCTC	TC(2*6)	162	12	ACGTCTCCCTCCTTCTCGT[TCTCTCTCTCTC]CTGCGGCGCTCGGAGCATCTTGCAAAATCCCTCAAGGTTTTGGGCAAGAAACAAAGCTGAGAAGCTTGGCAGCCTCGTGTGCCATTATACAAGCATA	ACGTCTCCCTCCTTCTCGTT	60.252	0.55	TATGCTTGTATAATGGCACACGA	60.4	0.391304	128
isoform_119282_12915_2	TCTCTCTCTCTC	TC(2*6)	162	12	ACGTCTCCCTCCTTCTCGT[TCTCTCTCTCTC]CTGCGGCGCTCGGAGCATCTTGCAAAATCCCTCAAGGTTTTGGGCAAGAAACAAAGCTGAGAAGCTTGGCAGCCTCGTGTGCCATTATACAAGCATACGCT	ACGTCTCCCTCCTTCTCGTT	60.252	0.55	AGCGTATGCTTGTATAATGGCAC	60.413	0.434783	132
isoform_119282_12915_3	TCTCTCTCTCTC	TC(2*6)	162	12	ACGTCTCCCTCCTTCTCGT[TCTCTCTCTCTC]CTGCGGCGCTCGGAGCATCTTGCAAAATCCCTCAAGGTTTTGGGCAAGAAACAAAGCTGAGAAGCTTGGCAGCCTCGTGTGCCATTATACAAGCATAC	ACGTCTCCCTCCTTCTCGTT	60.252	0.55	GTATGCTTGTATAATGGCACACG	59.463	0.434783	129
isoform_119508_12920_2	GACGACGACGACGACGACGAC	GAC(3*7)	200	21	CAATGAAAGAGGAGAAATTCGTGAAGGGCTGGAGGAGGATGATGATGAGGGATGGG[GACGACGACGACGACGACGAC]GGACGGGTCAGAGTCGGATTAAGTGGGATTACTCTGTGGGGAGGTTGTGAAGAGGATGATTGATGGCTCAGAGTTTGATT	CAATGAAAGAGGAGAAATTCGTG	60.116	0.391304	AATCAAACTCTGAGCCATCAATC	59.612	0.391304	157
isoform_119508_12920_3	GACGACGACGACGACGACGAC	GAC(3*7)	200	21	TGAAAGAGGAGAAATTCGTGAAGGGCTGGAGGAGGATGATGATGAGGGATGGG[GACGACGACGACGACGACGAC]GGACGGGTCAGAGTCGGATTAAGTGGGATTACTCTGTGGGGAGGTTGTGAAGAGGATGATTGATGGCTCAGAGTTTGATT	TGAAAGAGGAGAAATTCGTGAAG	59.879	0.391304	AATCAAACTCTGAGCCATCAATC	59.612	0.391304	154
isoform_119508_12920_4	GACGACGACGACGACGACGAC	GAC(3*7)	200	21	CAATGAAAGAGGAGAAATTCGTGAAGGGCTGGAGGAGGATGATGATGAGGGATGGG[GACGACGACGACGACGACGAC]GGACGGGTCAGAGTCGGATTAAGTGGGATTA	CAATGAAAGAGGAGAAATTCGTG	60.116	0.391304	TAATCCCACTTAATCCGACTCTG	59.51	0.434783	108
isoform_119508_12920_5	GACGACGACGACGACGACGAC	GAC(3*7)	200	21	CAATGAAAGAGGAGAAATTCGTGAAGGGCTGGAGGAGGATGATGATGAGGGATGGG[GACGACGACGACGACGACGAC]GGACGGGTCAGAGTCGGATTAAGTGGGATTACTCTG	CAATGAAAGAGGAGAAATTCGTG	60.116	0.391304	CAGAGTAATCCCACTTAATCCGA	59.51	0.434783	113
isoform_119859_12927_2	CTCTCTCTCTCTCTCTCTCTCT	CT(2*11)	187	22	AATTATGGCTATCTCCTTCGACCCCTCTCGCTCTCTCG[CTCTCTCTCTCTCTCTCTCTCT]TTATACATGTATGCAACATGGGCCTCTTCAGTGAAACCCTCAATTG	AATTATGGCTATCTCCTTCGACC	59.853	0.434783	CAATTGAGGGTTTCACTGAAGAG	60.151	0.434783	106
isoform_11999_2360_1	CAGCAGCAGCAGCAGCAGCAG	CAG(3*7)	1374	21	TCTCACAAGAAGGTCATGGAAATGAGGAGAAGGAAGGCTTTTCACCTATGATCGA[CAGCAGCAGCAGCAGCAGCAG]CATATGACACATCATGTGCGTGCACCGGCTCCAGCCAAGGCGCACTCCGATGTCCCGTAATCAACACCTAA	TCTCACAAGAAGGTCATGGAAAT	59.99	0.391304	TTAGGTGTTGATTACGGGACATC	60.122	0.434783	147
isoform_11999_2360_2	CAGCAGCAGCAGCAGCAGCAG	CAG(3*7)	1374	21	TCTCACAAGAAGGTCATGGAAATGAGGAGAAGGAAGGCTTTTCACCTATGATCGA[CAGCAGCAGCAGCAGCAGCAG]CATATGACACATCATGTGCGTGCACCGGCTCCAGCCAAGGCGCACTCCGATGTCCCGTAATCAACACCTAATC	TCTCACAAGAAGGTCATGGAAAT	59.99	0.391304	GATTAGGTGTTGATTACGGGACA	60.122	0.434783	149
isoform_11999_2360_3	CAGCAGCAGCAGCAGCAGCAG	CAG(3*7)	1374	21	TCTCACAAGAAGGTCATGGAAATGAGGAGAAGGAAGGCTTTTCACCTATGATCGA[CAGCAGCAGCAGCAGCAGCAG]CATATGACACATCATGTGCGTGCACCGGCTCCAGCCAAGGCGCACTCCGATGTCCCGTAATCAACACCTAATCA	TCTCACAAGAAGGTCATGGAAAT	59.99	0.391304	TGATTAGGTGTTGATTACGGGAC	60.122	0.434783	150
isoform_11999_2360_4	CAGCAGCAGCAGCAGCAGCAG	CAG(3*7)	1374	21	ATTCTCACAAGAAGGTCATGGAAATGAGGAGAAGGAAGGCTTTTCACCTATGATCGA[CAGCAGCAGCAGCAGCAGCAG]CATATGACACATCATGTGCGTGCACCGGCTCCAGCCAAGGCGCACTCCGATGTCCCGTAATCAACACCTAA	ATTCTCACAAGAAGGTCATGGAA	59.99	0.391304	TTAGGTGTTGATTACGGGACATC	60.122	0.434783	149
isoform_11999_2360_5	CAGCAGCAGCAGCAGCAGCAG	CAG(3*7)	1374	21	ATTCTCACAAGAAGGTCATGGAAATGAGGAGAAGGAAGGCTTTTCACCTATGATCGA[CAGCAGCAGCAGCAGCAGCAG]CATATGACACATCATGTGCGTGCACCGGCTCCAGCCAAGGCGCACTCCGATGTCCCGTAATCAACACCTAATC	ATTCTCACAAGAAGGTCATGGAA	59.99	0.391304	GATTAGGTGTTGATTACGGGACA	60.122	0.434783	151
isoform_120175_12937_3	CTCTCTCTCTCTCTCTCTCTCTCTCTCTCTCTCTCTCTCTCT	CT(2*21)	236	42	ACCATTAACTTACCACAATTGCCGATACGCCTCCCCTCTCTGCATGGACAGCTCCGTGATTTCGTGCTCGCATGTCTCTTGGGGGAGTTTTGAG[CTCTCTCTCTCTCTCTCTCTCTCTCTCTCTCTCTCTCTCTCT]CATACGCTCGGTGCATACAAAAAC	ACCATTAACTTACCACAATTGCC	59.218	0.391304	GTTTTTGTATGCACCGAGCGTAT	62.368	0.434783	160
isoform_120175_12937_5	CTCTCTCTCTCTCTCTCTCTCTCTCTCTCTCTCTCTCTCTCT	CT(2*21)	236	42	ACCATTAACTTACCACAATTGCCGATACGCCTCCCCTCTCTGCATGGACAGCTCCGTGATTTCGTGCTCGCATGTCTCTTGGGGGAGTTTTGAG[CTCTCTCTCTCTCTCTCTCTCTCTCTCTCTCTCTCTCTCTCT]CATACGCTCGGTGCATACAAAA	ACCATTAACTTACCACAATTGCC	59.218	0.391304	TTTTGTATGCACCGAGCGTAT	60.522	0.428571	158
isoform_120360_12945_1	CTCTCTCTCTCTCTCTCTCTCTCTCTCTCTCTCTCTCTCTCTCTCT	CT(2*23)	181	46	CTTCCAATCACCTCAGTTTCATTGACGGGGCTCTCTTGGCTCCACATCTTGAACATGCG[CTCTCTCTCTCTCTCTCTCTCTCTCTCTCTCTCTCTCTCTCTCTCT]TATATCATTATTTCCACCCTTATATAAAGCGAGGATAAATTGGAATTTGGGAC	CTTCCAATCACCTCAGTTTCATT	59.513	0.391304	GTCCCAAATTCCAATTTATCCTC	59.916	0.391304	158
isoform_120360_12945_2	CTCTCTCTCTCTCTCTCTCTCTCTCTCTCTCTCTCTCTCTCTCTCT	CT(2*23)	181	46	CCAATCACCTCAGTTTCATTGACGGGGCTCTCTTGGCTCCACATCTTGAACATGCG[CTCTCTCTCTCTCTCTCTCTCTCTCTCTCTCTCTCTCTCTCTCTCT]TATATCATTATTTCCACCCTTATATAAAGCGAGGATAAATTGGAATTTGGGAC	CCAATCACCTCAGTTTCATTGAC	60.768	0.434783	GTCCCAAATTCCAATTTATCCTC	59.916	0.391304	155
isoform_120360_12945_3	CTCTCTCTCTCTCTCTCTCTCTCTCTCTCTCTCTCTCTCTCTCTCT	CT(2*23)	181	46	CTTCCAATCACCTCAGTTTCATTGACGGGGCTCTCTTGGCTCCACATCTTGAACATGCG[CTCTCTCTCTCTCTCTCTCTCTCTCTCTCTCTCTCTCTCTCTCTCT]TATATCATTATTTCCACCCTTATATAAAGCGAGGATAAATTGGAATTT	CTTCCAATCACCTCAGTTTCATT	59.513	0.391304	AAATTCCAATTTATCCTCGCTTT	59.42	0.304348	153
isoform_120360_12945_4	CTCTCTCTCTCTCTCTCTCTCTCTCTCTCTCTCTCTCTCTCTCTCT	CT(2*23)	181	46	CTTCCAATCACCTCAGTTTCATTGACGGGGCTCTCTTGGCTCCACATCTTGAACATGCG[CTCTCTCTCTCTCTCTCTCTCTCTCTCTCTCTCTCTCTCTCTCTCT]TATATCATTATTTCCACCCTTATATAAAGCGAGGATAAATTGGAATTTG	CTTCCAATCACCTCAGTTTCATT	59.513	0.391304	CAAATTCCAATTTATCCTCGCTT	60.636	0.347826	154
isoform_120360_12945_5	CTCTCTCTCTCTCTCTCTCTCTCTCTCTCTCTCTCTCTCTCTCTCT	CT(2*23)	181	46	CCAATCACCTCAGTTTCATTGACGGGGCTCTCTTGGCTCCACATCTTGAACATGCG[CTCTCTCTCTCTCTCTCTCTCTCTCTCTCTCTCTCTCTCTCTCTCT]TATATCATTATTTCCACCCTTATATAAAGCGAGGATAAATTGGAATTT	CCAATCACCTCAGTTTCATTGAC	60.768	0.434783	AAATTCCAATTTATCCTCGCTTT	59.42	0.304348	150
isoform_12054_2369_1	ACACATACACATACACATACACAT	ACACAT(6*4)	352	24	TGGAATTTTCATAAGCTCAAAGCTTTTTGGCAATATCAGGGTC[ACACATACACATACACATACACAT]ACACAGCCACAGCCACACACTCTCACACATTCATACATCGAGCTGT	TGGAATTTTCATAAGCTCAAAGC	59.761	0.347826	ACAGCTCGATGTATGAATGTGTG	60.074	0.434783	113
isoform_12054_2369_2	ACACATACACATACACATACACAT	ACACAT(6*4)	352	24	TGGAATTTTCATAAGCTCAAAGCTTTTTGGCAATATCAGGGTC[ACACATACACATACACATACACAT]ACACAGCCACAGCCACACACTCTCACACATTCATACATCGAGC	TGGAATTTTCATAAGCTCAAAGC	59.761	0.347826	GCTCGATGTATGAATGTGTGAGA	60.154	0.434783	110
isoform_12054_2369_3	ACACATACACATACACATACACAT	ACACAT(6*4)	352	24	TTCGTTGGAATTTTCATAAGCTCAAAGCTTTTTGGCAATATCAGGGTC[ACACATACACATACACATACACAT]ACACAGCCACAGCCACACACTCTCACACATTCATACATCGAGCTGT	TTCGTTGGAATTTTCATAAGCTC	59.637	0.347826	ACAGCTCGATGTATGAATGTGTG	60.074	0.434783	118
isoform_12054_2369_4	ACACATACACATACACATACACAT	ACACAT(6*4)	352	24	TTCGTTGGAATTTTCATAAGCTCAAAGCTTTTTGGCAATATCAGGGTC[ACACATACACATACACATACACAT]ACACAGCCACAGCCACACACTCTCACACATTCATACATCGAGC	TTCGTTGGAATTTTCATAAGCTC	59.637	0.347826	GCTCGATGTATGAATGTGTGAGA	60.154	0.434783	115
isoform_12054_2369_5	ACACATACACATACACATACACAT	ACACAT(6*4)	352	24	CGTTGGAATTTTCATAAGCTCAAAGCTTTTTGGCAATATCAGGGTC[ACACATACACATACACATACACAT]ACACAGCCACAGCCACACACTCTCACACATTCATACATCGAGCTGT	CGTTGGAATTTTCATAAGCTCAA	60.464	0.347826	ACAGCTCGATGTATGAATGTGTG	60.074	0.434783	116
isoform_120630_12950_3	AGAGAGAGAGAGAGAGAGAG	AG(2*10)	248	20	CAAATAACTCAAAAGGGGAAAGGGGGAA[AGAGAGAGAGAGAGAGAGAG]GGGGGGGGGGGGGGGGGGTTACGATGCCTGCGTCCATTTGAGCTGTATTCGACATAAGCTCGAATACGTAAGCTGTCTGGA	CAAATAACTCAAAAGGGGAAAGG	60.207	0.391304	TCCAGACAGCTTACGTATTCGAG	60.793	0.478261	129
isoform_120630_12951_3	GGGGGGGGGGGGGGGGGGG	G(1*19)	267	19	CAAATAACTCAAAAGGGGAAAGGGGGAA[AGAGAGAGAGAGAGAGAGAG]GGGGGGGGGGGGGGGGGGTTACGATGCCTGCGTCCATTTGAGCTGTATTCGACATAAGCTCGAATACGTAAGCTGTCTGGA	CAAATAACTCAAAAGGGGAAAGG	60.207	0.391304	TCCAGACAGCTTACGTATTCGAG	60.793	0.478261	129
isoform_120853_12957_1	CACACACACACA	CA(2*6)	261	12	ATCTATATGAGGAGGAAGCCTGGCCATTTAGGAACAAAGAATCTCTCGGACATTGGAGATAACCCAATCTG[CACACACACACA]TGGTGTGCTCTGATGTGCGTCTAAAAGGAGAGTGATGATAGTCAGATTGAGGTCCTGCTATTG	ATCTATATGAGGAGGAAGCCTGG	59.965	0.478261	CAATAGCAGGACCTCAATCTGAC	60.144	0.478261	146
isoform_120853_12957_2	CACACACACACA	CA(2*6)	261	12	GCATCTATATGAGGAGGAAGCCTGGCCATTTAGGAACAAAGAATCTCTCGGACATTGGAGATAACCCAATCTG[CACACACACACA]TGGTGTGCTCTGATGTGCGTCTAAAAGGAGAGTGATGATAGTCAGATTGAGGTCCTGCTATTG	GCATCTATATGAGGAGGAAGCCT	60.095	0.478261	CAATAGCAGGACCTCAATCTGAC	60.144	0.478261	148
isoform_120853_12957_3	CACACACACACA	CA(2*6)	261	12	GCTGATGCATCTATATGAGGAGGAAGCCTGGCCATTTAGGAACAAAGAATCTCTCGGACATTGGAGATAACCCAATCTG[CACACACACACA]TGGTGTGCTCTGATGTGCGTCTAAAAGGAGAGTGATGATAGTCAGATTGAGGTCCTGCTATTG	GCTGATGCATCTATATGAGGAGG	60.095	0.478261	CAATAGCAGGACCTCAATCTGAC	60.144	0.478261	154
isoform_120853_12957_4	CACACACACACA	CA(2*6)	261	12	ATCTATATGAGGAGGAAGCCTGGCCATTTAGGAACAAAGAATCTCTCGGACATTGGAGATAACCCAATCTG[CACACACACACA]TGGTGTGCTCTGATGTGCGTCTAAAAGGAGAGT	ATCTATATGAGGAGGAAGCCTGG	59.965	0.478261	ACTCTCCTTTTAGACGCACATCA	60.309	0.434783	116
isoform_120853_12957_5	CACACACACACA	CA(2*6)	261	12	ATCTATATGAGGAGGAAGCCTGGCCATTTAGGAACAAAGAATCTCTCGGACATTGGAGATAACCCAATCTG[CACACACACACA]TGGTGTGCTCTGATGTGCGTCTAAAAGGAGAGTG	ATCTATATGAGGAGGAAGCCTGG	59.965	0.478261	CACTCTCCTTTTAGACGCACATC	60.309	0.478261	117
isoform_121213_12966_1	GAGAGAGAGAGAGAGAGAGAGAGAGAGA	GA(2*14)	198	28	AGCACATGGGTACTAGTCTGAGCTCCCCTTCCCGCCATCGCCCGTGAGTGGCTCTCACTTCCTCCCT[GAGAGAGAGAGAGAGAGAGAGAGAGAGA]GCTATCCATCTGCGATCGTGTAATCAGGTTCTTCACAACCC	AGCACATGGGTACTAGTCTGAGC	59.852	0.521739	GGGTTGTGAAGAACCTGATTACA	60.268	0.434783	136
isoform_1213_202_1	TCTCTCTCTCTCTCTCTCTCTCTC	TC(2*12)	254	24	TCGATTACTTGAATTGTGTCGTGGGA[TCTCTCTCTCTCTCTCTCTCTCTC]GATACACAGTCTTTGGGCGTAGGCCGTTTCGGTTCCTTTCTTATGATTGGGTTTAGCAGGCGGTCTCCTGGGTCTTGATATCAAAGGGCATTCATATATCCAG	TCGATTACTTGAATTGTGTCGTG	60.046	0.391304	CTGGATATATGAATGCCCTTTGA	60.175	0.391304	153
isoform_1213_202_2	TCTCTCTCTCTCTCTCTCTCTCTC	TC(2*12)	254	24	TCGATTACTTGAATTGTGTCGTGGGA[TCTCTCTCTCTCTCTCTCTCTCTC]GATACACAGTCTTTGGGCGTAGGCCGTTTCGGTTCCTTTCTTATGATTGGGTT	TCGATTACTTGAATTGTGTCGTG	60.046	0.391304	AACCCAATCATAAGAAAGGAACC	59.622	0.391304	103
isoform_1213_202_3	TCTCTCTCTCTCTCTCTCTCTCTC	TC(2*12)	254	24	TCGATTACTTGAATTGTGTCGTGGGA[TCTCTCTCTCTCTCTCTCTCTCTC]GATACACAGTCTTTGGGCGTAGGCCGTTTCGGTTCCTTTCTTATGATTGGGTTTAGCAGG	TCGATTACTTGAATTGTGTCGTG	60.046	0.391304	CCTGCTAAACCCAATCATAAGAA	59.528	0.391304	110
isoform_1213_202_4	TCTCTCTCTCTCTCTCTCTCTCTC	TC(2*12)	254	24	TCGATTACTTGAATTGTGTCGTGGGA[TCTCTCTCTCTCTCTCTCTCTCTC]GATACACAGTCTTTGGGCGTAGGCCGTTTCGGTTCCTTTCTTATGATTG	TCGATTACTTGAATTGTGTCGTG	60.046	0.391304	CAATCATAAGAAAGGAACCGAAA	59.507	0.347826	99
isoform_1213_202_5	TCTCTCTCTCTCTCTCTCTCTCTC	TC(2*12)	254	24	CCTCTCCTCCTCTCTTTCTGTCTCGATTACTTGAATTGTGTCGTGGGA[TCTCTCTCTCTCTCTCTCTCTCTC]GATACACAGTCTTTGGGCGTAGGCCGTTTCGGTTCCTTTCTTATGATTGGGTT	CCTCTCCTCCTCTCTTTCTGTCT	59.652	0.521739	AACCCAATCATAAGAAAGGAACC	59.622	0.391304	125
isoform_12148_2386_1	CACACACACACA	CA(2*6)	750	12	AGTCGCATGCCAAAACTATTTCGTCCCGCAGACACATCCGCAC[CACACACACACA]AAAGAAAGCTGAACCGCCGCAGCTGCCTTTCCAGAGATCCACCTCAGATAA	AGTCGCATGCCAAAACTATTTC	60.497	0.409091	TTATCTGAGGTGGATCTCTGGAA	60.082	0.434783	106
isoform_12148_2386_2	CACACACACACA	CA(2*6)	750	12	CTCAGATGATGGTATTTTCGGCTGAAGGCAATTCCTGCCATTCTCTCTCGTGTGGAGTCGCATGCCAAAACTATTTCGTCCCGCAGACACATCCGCAC[CACACACACACA]AAAGAAAGCTGAACCGCCGCAGCTGCCTTTCCAGAGATCCACCTCAGATA	CTCAGATGATGGTATTTTCGGCT	61.65	0.434783	TATCTGAGGTGGATCTCTGGAAA	60.082	0.434783	160
isoform_121533_12975_1	GAGAGAGAGAGAGAGAGA	GA(2*9)	192	18	GAGGTTGACAGAGGATGAAAGTGCGTTGGCAGGCAAGCAGAGGTCTAATGGGGCCAGGTTGGACAGCGAAAGCAGGAGAGGTTTTGTGGTTTGGGAGGGGGAG[GAGAGAGAGAGAGAGAGA]GCGCACTTAGCTTGTGGCTTTGACAAAT	GAGGTTGACAGAGGATGAAAGTG	60.16	0.478261	ATTTGTCAAAGCCACAAGCTAAG	59.841	0.391304	149
isoform_121533_12975_2	GAGAGAGAGAGAGAGAGA	GA(2*9)	192	18	GAGGTTGACAGAGGATGAAAGTGCGTTGGCAGGCAAGCAGAGGTCTAATGGGGCCAGGTTGGACAGCGAAAGCAGGAGAGGTTTTGTGGTTTGGGAGGGGGAG[GAGAGAGAGAGAGAGAGA]GCGCACTTAGCTTGTGGCTTTGACAAA	GAGGTTGACAGAGGATGAAAGTG	60.16	0.478261	TTTGTCAAAGCCACAAGCTAAGT	60.333	0.391304	148
isoform_121533_12975_3	GAGAGAGAGAGAGAGAGA	GA(2*9)	192	18	GAGGTTGACAGAGGATGAAAGTGCGTTGGCAGGCAAGCAGAGGTCTAATGGGGCCAGGTTGGACAGCGAAAGCAGGAGAGGTTTTGTGGTTTGGGAGGGGGAG[GAGAGAGAGAGAGAGAGA]GCGCACTTAGCTTGTGGCTTTGACAAATG	GAGGTTGACAGAGGATGAAAGTG	60.16	0.478261	CATTTGTCAAAGCCACAAGCTA	60.298	0.409091	150
isoform_121533_12975_4	GAGAGAGAGAGAGAGAGA	GA(2*9)	192	18	GAGGTTGACAGAGGATGAAAGTGCGTTGGCAGGCAAGCAGAGGTCTAATGGGGCCAGGTTGGACAGCGAAAGCAGGAGAGGTTTTGTGGTTTGGGAGGGGGAG[GAGAGAGAGAGAGAGAGA]GCGCACTTAGCTTGTGGCTTTGACAAA	GAGGTTGACAGAGGATGAAAGTG	60.16	0.478261	TTTGTCAAAGCCACAAGCTAAG	59.575	0.409091	148
isoform_121533_12975_5	GAGAGAGAGAGAGAGAGA	GA(2*9)	192	18	GAGGTTGACAGAGGATGAAAGTGCGTTGGCAGGCAAGCAGAGGTCTAATGGGGCCAGGTTGGACAGCGAAAGCAGGAGAGGTTTTGTGGTTTGGGAGGGGGAG[GAGAGAGAGAGAGAGAGA]GCGCACTTAGCTTGTGGCTTTGACAAATG	GAGGTTGACAGAGGATGAAAGTG	60.16	0.478261	CATTTGTCAAAGCCACAAGCTAA	61.487	0.391304	150
isoform_12166_2388_1	CTCTCTCTCTCTCTCTCTCTCTCTCTCT	CT(2*14)	220	28	CAGGGAGAAAAACATGCTCTCTTC[CTCTCTCTCTCTCTCTCTCTCTCTCTCT]GTCGGGTAGCTGACGAGCACTCAGAGGACGAACAAATGCCCGTTCGACAGCTATAGGGACTTCC	CAGGGAGAAAAACATGCTCTCTT	61.1	0.434783	GGAAGTCCCTATAGCTGTCGAAC	60.498	0.521739	116
isoform_12166_2388_2	CTCTCTCTCTCTCTCTCTCTCTCTCTCT	CT(2*14)	220	28	CAGGGAGAAAAACATGCTCTCTTC[CTCTCTCTCTCTCTCTCTCTCTCTCTCT]GTCGGGTAGCTGACGAGCACTCAGAGGACGAACAAATGCCCGTTCGACAGCTATAGGGACTTCCACTTTG	CAGGGAGAAAAACATGCTCTCTT	61.1	0.434783	CAAAGTGGAAGTCCCTATAGCTG	59.334	0.478261	122
isoform_12166_2388_3	CTCTCTCTCTCTCTCTCTCTCTCTCTCT	CT(2*14)	220	28	CAGGGAGAAAAACATGCTCTCTTC[CTCTCTCTCTCTCTCTCTCTCTCTCTCT]GTCGGGTAGCTGACGAGCACTCAGAGGACGAACAAATGCCCGTTCGACAGCTATAGGGACTTCCACTTTGT	CAGGGAGAAAAACATGCTCTCTT	61.1	0.434783	ACAAAGTGGAAGTCCCTATAGCTG	60.076	0.458333	123
isoform_12166_2388_4	CTCTCTCTCTCTCTCTCTCTCTCTCTCT	CT(2*14)	220	28	CAGGGAGAAAAACATGCTCTCTTC[CTCTCTCTCTCTCTCTCTCTCTCTCTCT]GTCGGGTAGCTGACGAGCACTCAGAGGACGAACAAATGCCCGTTCGACAGCTATAGGGACTT	CAGGGAGAAAAACATGCTCTCTT	61.1	0.434783	AAGTCCCTATAGCTGTCGAACG	59.804	0.5	114
isoform_12166_2388_5	CTCTCTCTCTCTCTCTCTCTCTCTCTCT	CT(2*14)	220	28	CAGGGAGAAAAACATGCTCTCTTC[CTCTCTCTCTCTCTCTCTCTCTCTCTCT]GTCGGGTAGCTGACGAGCACTCAGAGGACGAACAAATGCCCGTTCGACAGCTATAGGGACTTCC	CAGGGAGAAAAACATGCTCTCTT	61.1	0.434783	GGAAGTCCCTATAGCTGTCGAA	59.747	0.5	116
isoform_1217_205_1	GAGAGAGAGAGAGAGA	GA(2*8)	202	16	TGGCAATTCTACCAGTCAAATCTCTACACCTATGTCTCTGTGTGTCGC[GAGAGAGAGAGAGAGA]GCGCGCGCGCACGAGCGAGGGAGGAGTTAATGGCGTAGTTCAA	TGGCAATTCTACCAGTCAAATCT	60.014	0.391304	TTGAACTACGCCATTAACTCCTC	59.68	0.434783	107
isoform_1217_205_2	GAGAGAGAGAGAGAGA	GA(2*8)	202	16	CTGGCAATTCTACCAGTCAAATCTCTACACCTATGTCTCTGTGTGTCGC[GAGAGAGAGAGAGAGA]GCGCGCGCGCACGAGCGAGGGAGGAGTTAATGGCGTAGTTCAA	CTGGCAATTCTACCAGTCAAATC	60.014	0.434783	TTGAACTACGCCATTAACTCCTC	59.68	0.434783	108
isoform_1217_205_3	GAGAGAGAGAGAGAGA	GA(2*8)	202	16	TGGCAATTCTACCAGTCAAATCTCTACACCTATGTCTCTGTGTGTCGC[GAGAGAGAGAGAGAGA]GCGCGCGCGCACGAGCGAGGGAGGAGTTAATGGCGTAGTTCAATC	TGGCAATTCTACCAGTCAAATCT	60.014	0.391304	GATTGAACTACGCCATTAACTCC	59.073	0.434783	109
isoform_1217_205_4	GAGAGAGAGAGAGAGA	GA(2*8)	202	16	CTGGCAATTCTACCAGTCAAATCTCTACACCTATGTCTCTGTGTGTCGC[GAGAGAGAGAGAGAGA]GCGCGCGCGCACGAGCGAGGGAGGAGTTAATGGCGTAGTTCAATC	CTGGCAATTCTACCAGTCAAATC	60.014	0.434783	GATTGAACTACGCCATTAACTCC	59.073	0.434783	110
isoform_1217_205_5	GAGAGAGAGAGAGAGA	GA(2*8)	202	16	TGGCAATTCTACCAGTCAAATCTCTACACCTATGTCTCTGTGTGTCGC[GAGAGAGAGAGAGAGA]GCGCGCGCGCACGAGCGAGGGAGGAGTTAATGGCGTAGTTCAATCTGTG	TGGCAATTCTACCAGTCAAATCT	60.014	0.391304	CACAGATTGAACTACGCCATTAAC	59.958	0.416667	113
isoform_12199_2396_1	GTGTGTGTGTGT	GT(2*6)	262	12	AACACATGCTCCTTTCTTCACTCGCAACCAAAAGGAGCTACTGCTGG[GTGTGTGTGTGT]GCCCGCACACACTGCTGTGTAATTTGTATGTTGTCTTGCACATGATAGCATTTTGCCTCATAGGACA	AACACATGCTCCTTTCTTCACTC	59.809	0.434783	TGTCCTATGAGGCAAAATGCTAT	60.003	0.391304	126
isoform_12199_2396_2	GTGTGTGTGTGT	GT(2*6)	262	12	GCCCAGAAAATAAGAAGGAGCTAACACATGCTCCTTTCTTCACTCGCAACCAAAAGGAGCTACTGCTGG[GTGTGTGTGTGT]GCCCGCACACACTGCTGTGTAATTTGTATGTTGTCTTGCACATGATAGCATTTTGCCTCATAGGACA	GCCCAGAAAATAAGAAGGAGCTA	60.22	0.434783	TGTCCTATGAGGCAAAATGCTAT	60.003	0.391304	148
isoform_12202_2397_1	AGAGAGAGAGAGAGAG	AG(2*8)	2081	16	TGAATTTCAACCTTCAGAAATGGCTGGGGGCTGAGTTTACTCGAGTCTAGCTGGTTTAAAAACAGCACATGGTGCCAATGACTCT[AGAGAGAGAGAGAGAG]GAAGAGAGAGAGAAATAGAAGATAATGAATTAACGTCTGCAAAAAGACCATGCTAGT	TGAATTTCAACCTTCAGAAATGG	60.33	0.347826	ACTAGCATGGTCTTTTTGCAGAC	59.839	0.434783	158
isoform_12202_2397_2	AGAGAGAGAGAGAGAG	AG(2*8)	2081	16	AATTTCAACCTTCAGAAATGGCTGGGGGCTGAGTTTACTCGAGTCTAGCTGGTTTAAAAACAGCACATGGTGCCAATGACTCT[AGAGAGAGAGAGAGAG]GAAGAGAGAGAGAAATAGAAGATAATGAATTAACGTCTGCAAAAAGACCATGCTAGT	AATTTCAACCTTCAGAAATGGCT	60.346	0.347826	ACTAGCATGGTCTTTTTGCAGAC	59.839	0.434783	156
isoform_12202_2397_3	AGAGAGAGAGAGAGAG	AG(2*8)	2081	16	TGAATTTCAACCTTCAGAAATGGCTGGGGGCTGAGTTTACTCGAGTCTAGCTGGTTTAAAAACAGCACATGGTGCCAATGACTCT[AGAGAGAGAGAGAGAG]GAAGAGAGAGAGAAATAGAAGATAATGAATTAACGTCTGCAAAAAGACC	TGAATTTCAACCTTCAGAAATGG	60.33	0.347826	GGTCTTTTTGCAGACGTTAATTC	59.218	0.391304	150
isoform_12202_2397_4	AGAGAGAGAGAGAGAG	AG(2*8)	2081	16	AATTTCAACCTTCAGAAATGGCTGGGGGCTGAGTTTACTCGAGTCTAGCTGGTTTAAAAACAGCACATGGTGCCAATGACTCT[AGAGAGAGAGAGAGAG]GAAGAGAGAGAGAAATAGAAGATAATGAATTAACGTCTGCAAAAAGACC	AATTTCAACCTTCAGAAATGGCT	60.346	0.347826	GGTCTTTTTGCAGACGTTAATTC	59.218	0.391304	148
isoform_12202_2397_5	AGAGAGAGAGAGAGAG	AG(2*8)	2081	16	TGAATTTCAACCTTCAGAAATGGCTGGGGGCTGAGTTTACTCGAGTCTAGCTGGTTTAAAAACAGCACATGGTGCCAATGACTCT[AGAGAGAGAGAGAGAG]GAAGAGAGAGAGAAATAGAAGATAATGAATTAACGTCTGCAAAAAGACCAT	TGAATTTCAACCTTCAGAAATGG	60.33	0.347826	ATGGTCTTTTTGCAGACGTTAAT	59.113	0.347826	152
isoform_122370_12991_1	GCAGCAGCAGCAGCA	GCA(3*5)	241	15	CTATGGCCATGAATTTTGATGATGGCACCTG[GCAGCAGCAGCAGCA]GAGCCTCTACCGATCGCCCTCCCCCAGCTTTTTTCAGAGGCCTTGTCCACTGTTTCTTCCGTCT	CTATGGCCATGAATTTTGATGAT	60.055	0.347826	AGACGGAAGAAACAGTGGACAAG	61.925	0.478261	110
isoform_122370_12991_2	GCAGCAGCAGCAGCA	GCA(3*5)	241	15	CTATGGCCATGAATTTTGATGATGGCACCTG[GCAGCAGCAGCAGCA]GAGCCTCTACCGATCGCCCTCCCCCAGCTTTTTTCAGAGGCCTTGTCCACTGTTTCTTCCGTCTCGTGAAG	CTATGGCCATGAATTTTGATGAT	60.055	0.347826	CTTCACGAGACGGAAGAAACAGT	62.048	0.478261	117
isoform_122370_12991_3	GCAGCAGCAGCAGCA	GCA(3*5)	241	15	CTATGGCCATGAATTTTGATGATGGCACCTG[GCAGCAGCAGCAGCA]GAGCCTCTACCGATCGCCCTCCCCCAGCTTTTTTCAGAGGCCTTGTCCACTGTTTCTTCCGTC	CTATGGCCATGAATTTTGATGAT	60.055	0.347826	GACGGAAGAAACAGTGGACAAG	61.074	0.5	109
isoform_122370_12991_4	GCAGCAGCAGCAGCA	GCA(3*5)	241	15	CTATGGCCATGAATTTTGATGATGGCACCTG[GCAGCAGCAGCAGCA]GAGCCTCTACCGATCGCCCTCCCCCAGCTTTTTTCAGAGGCCTTGTCCACTGTTTCTTCCGTCT	CTATGGCCATGAATTTTGATGAT	60.055	0.347826	AGACGGAAGAAACAGTGGACAA	61.074	0.454545	110
isoform_122370_12991_5	GCAGCAGCAGCAGCA	GCA(3*5)	241	15	CTATGGCCATGAATTTTGATGATGGCACCTG[GCAGCAGCAGCAGCA]GAGCCTCTACCGATCGCCCTCCCCCAGCTTTTTTCAGAGGCCTTGTCCACTGTTTCTTCCGTCTCGTGA	CTATGGCCATGAATTTTGATGAT	60.055	0.347826	TCACGAGACGGAAGAAACAGT	59.899	0.47619	115
isoform_12267_2417_1	TTGTTGTTGTTGTTG	TTG(3*5)	913	15	TTCCTTTTTATGCAACTCAGGTCTTGAAT[TTGTTGTTGTTGTTG]ATTTATAGCCTTTGTCAGTTTTTTACCAAGGTTTTCTCGTCCTAGTCGTTTCTTTTG	TTCCTTTTTATGCAACTCAGGTC	59.659	0.391304	CAAAAGAAACGACTAGGACGAGA	59.935	0.434783	101
isoform_12267_2417_2	TTGTTGTTGTTGTTG	TTG(3*5)	913	15	GCAAAGATTTCCTTTTTATGCAACTCAGGTCTTGAAT[TTGTTGTTGTTGTTG]ATTTATAGCCTTTGTCAGTTTTTTACCAAGGTTTTCTCGTCCTAGTCGTTTCTTTTG	GCAAAGATTTCCTTTTTATGCAA	59.65	0.304348	CAAAAGAAACGACTAGGACGAGA	59.935	0.434783	109
isoform_12267_2417_3	TTGTTGTTGTTGTTG	TTG(3*5)	913	15	TTCCTTTTTATGCAACTCAGGTCTTGAAT[TTGTTGTTGTTGTTG]ATTTATAGCCTTTGTCAGTTTTTTACCAAGGTTTTCTCGTCCTAGTCGTTTCTTTTGCATTTGAGTGGATGATCTTAACACTATAATGTAGAGACATTGTATTTGGTCAAGGC	TTCCTTTTTATGCAACTCAGGTC	59.659	0.391304	GCCTTGACCAAATACAATGTCTC	59.891	0.434783	157
isoform_12267_2417_4	TTGTTGTTGTTGTTG	TTG(3*5)	913	15	TTCCTTTTTATGCAACTCAGGTCTTGAAT[TTGTTGTTGTTGTTG]ATTTATAGCCTTTGTCAGTTTTTTACCAAGGTTTTCTCGTCCTAGTCGTTTCTTTTGCATTTG	TTCCTTTTTATGCAACTCAGGTC	59.659	0.391304	CAAATGCAAAAGAAACGACTAGG	60.166	0.391304	107
isoform_12267_2417_5	TTGTTGTTGTTGTTG	TTG(3*5)	913	15	GCAAAGATTTCCTTTTTATGCAACTCAGGTCTTGAAT[TTGTTGTTGTTGTTG]ATTTATAGCCTTTGTCAGTTTTTTACCAAGGTTTTCTCGTCCTAGTCGTTTCTTTTGCATTTG	GCAAAGATTTCCTTTTTATGCAA	59.65	0.304348	CAAATGCAAAAGAAACGACTAGG	60.166	0.391304	115
isoform_12339_2436_1	CTCTCTCTCTCTCTCTCTCTCTCTCTCT	CT(2*14)	1793	28	GTTAGCAGCTACAAAGCCATGAAGCACGCAAGCTCGTCGTCCTCGCGGCTTATTTTGGGTTGCCCCGTATCGAAATCTGTTGCATGCCTCGTAC[CTCTCTCTCTCTCTCTCTCTCTCTCTCT]CATAGAAAAGAGAGGCAAGCTTATCAGC	GTTAGCAGCTACAAAGCCATGAA	60.78	0.434783	GCTGATAAGCTTGCCTCTCTTTT	60.504	0.434783	150
isoform_12339_2436_2	CTCTCTCTCTCTCTCTCTCTCTCTCTCT	CT(2*14)	1793	28	TTAGCAGCTACAAAGCCATGAAGCACGCAAGCTCGTCGTCCTCGCGGCTTATTTTGGGTTGCCCCGTATCGAAATCTGTTGCATGCCTCGTAC[CTCTCTCTCTCTCTCTCTCTCTCTCTCT]CATAGAAAAGAGAGGCAAGCTTATCAGC	TTAGCAGCTACAAAGCCATGAA	60.041	0.409091	GCTGATAAGCTTGCCTCTCTTTT	60.504	0.434783	149
isoform_12339_2436_3	CTCTCTCTCTCTCTCTCTCTCTCTCTCT	CT(2*14)	1793	28	GTTAGCAGCTACAAAGCCATGAAGCACGCAAGCTCGTCGTCCTCGCGGCTTATTTTGGGTTGCCCCGTATCGAAATCTGTTGCATGCCTCGTAC[CTCTCTCTCTCTCTCTCTCTCTCTCTCT]CATAGAAAAGAGAGGCAAGCTTATCA	GTTAGCAGCTACAAAGCCATGAA	60.78	0.434783	TGATAAGCTTGCCTCTCTTTTCT	58.857	0.391304	148
isoform_12339_2436_4	CTCTCTCTCTCTCTCTCTCTCTCTCTCT	CT(2*14)	1793	28	GTTAGCAGCTACAAAGCCATGAAGCACGCAAGCTCGTCGTCCTCGCGGCTTATTTTGGGTTGCCCCGTATCGAAATCTGTTGCATGCCTCGTAC[CTCTCTCTCTCTCTCTCTCTCTCTCTCT]CATAGAAAAGAGAGGCAAGCTTATCAG	GTTAGCAGCTACAAAGCCATGAA	60.78	0.434783	CTGATAAGCTTGCCTCTCTTTTC	58.857	0.434783	149
isoform_12339_2436_5	CTCTCTCTCTCTCTCTCTCTCTCTCTCT	CT(2*14)	1793	28	GTTAGCAGCTACAAAGCCATGAAGCACGCAAGCTCGTCGTCCTCGCGGCTTATTTTGGGTTGCCCCGTATCGAAATCTGTTGCATGCCTCGTAC[CTCTCTCTCTCTCTCTCTCTCTCTCTCT]CATAGAAAAGAGAGGCAAGCTTATCAGC	GTTAGCAGCTACAAAGCCATGA	59.563	0.454545	GCTGATAAGCTTGCCTCTCTTTT	60.504	0.434783	150
isoform_12339_2437_1	TGTGTGTGTGTGTG	TG(2*7)	1957	14	TATCTCTTCTCACTCCTTCTGCGCGTTTCCTGTCTCGGCCAGGTGTGTTTGATAAGCCGAGTGGTGCCCCAT[TGTGTGTGTGTGTG]TACTTCCAAGAGTGTGTGTCGGGTGCTTATAGAGGCCTTGTGTGT	TATCTCTTCTCACTCCTTCTGCG	60.158	0.478261	ACACACAAGGCCTCTATAAGCAC	59.73	0.478261	131
isoform_12339_2437_2	TGTGTGTGTGTGTG	TG(2*7)	1957	14	GGGTGGTTATCTCTTCTCACTCCTTCTGCGCGTTTCCTGTCTCGGCCAGGTGTGTTTGATAAGCCGAGTGGTGCCCCAT[TGTGTGTGTGTGTG]TACTTCCAAGAGTGTGTGTCGGGTGCTTATAGAGGCCTTGTGTGT	GGGTGGTTATCTCTTCTCACTCC	60.363	0.521739	ACACACAAGGCCTCTATAAGCAC	59.73	0.478261	138
isoform_12339_2437_3	TGTGTGTGTGTGTG	TG(2*7)	1957	14	TGGGTGGTTATCTCTTCTCACTCCTTCTGCGCGTTTCCTGTCTCGGCCAGGTGTGTTTGATAAGCCGAGTGGTGCCCCAT[TGTGTGTGTGTGTG]TACTTCCAAGAGTGTGTGTCGGGTGCTTATAGAGGCCTTGTGTGT	TGGGTGGTTATCTCTTCTCACTC	59.63	0.478261	ACACACAAGGCCTCTATAAGCAC	59.73	0.478261	139
isoform_12339_2437_4	TGTGTGTGTGTGTG	TG(2*7)	1957	14	AAGTGGGTGGTTATCTCTTCTCACTCCTTCTGCGCGTTTCCTGTCTCGGCCAGGTGTGTTTGATAAGCCGAGTGGTGCCCCAT[TGTGTGTGTGTGTG]TACTTCCAAGAGTGTGTGTCGGGTGCTTATAGAGGCCTTGTGTGT	AAGTGGGTGGTTATCTCTTCTCA	59.157	0.434783	ACACACAAGGCCTCTATAAGCAC	59.73	0.478261	142
isoform_12339_2437_5	TGTGTGTGTGTGTG	TG(2*7)	1957	14	CAAGTGGGTGGTTATCTCTTCTCACTCCTTCTGCGCGTTTCCTGTCTCGGCCAGGTGTGTTTGATAAGCCGAGTGGTGCCCCAT[TGTGTGTGTGTGTG]TACTTCCAAGAGTGTGTGTCGGGTGCTTATAGAGGCCTTGTGTGT	CAAGTGGGTGGTTATCTCTTCTC	59.157	0.478261	ACACACAAGGCCTCTATAAGCAC	59.73	0.478261	143
isoform_123442_13007_1	CTCTCTCTCTCTCTCTCTCT	CT(2*10)	200	20	CAACCTCAAAAATTCCAAGGGCACCGGCAAATGCCCCTAA[CTCTCTCTCTCTCTCTCTCT]TTCTGTCTCTCTTCACCCTCCCCCCTTCCTCAACCCCTCTTCTCTTCAAAAT	CAACCTCAAAAATTCCAAGGG	60.679	0.428571	ATTTTGAAGAGAAGAGGGGTTGA	60.452	0.391304	112
isoform_123442_13007_2	CTCTCTCTCTCTCTCTCTCT	CT(2*10)	200	20	CCAACCTCAAAAATTCCAAGGGCACCGGCAAATGCCCCTAA[CTCTCTCTCTCTCTCTCTCT]TTCTGTCTCTCTTCACCCTCCCCCCTTCCTCAACCCCTCTTCTCTTCAAAAT	CCAACCTCAAAAATTCCAAGG	60.679	0.428571	ATTTTGAAGAGAAGAGGGGTTGA	60.452	0.391304	113
isoform_123442_13007_3	CTCTCTCTCTCTCTCTCTCT	CT(2*10)	200	20	GCCAACCTCAAAAATTCCAAGGGCACCGGCAAATGCCCCTAA[CTCTCTCTCTCTCTCTCTCT]TTCTGTCTCTCTTCACCCTCCCCCCTTCCTCAACCCCTCTTCTCTTCAAAAT	GCCAACCTCAAAAATTCCAAG	60.816	0.428571	ATTTTGAAGAGAAGAGGGGTTGA	60.452	0.391304	114
isoform_123442_13007_4	CTCTCTCTCTCTCTCTCTCT	CT(2*10)	200	20	CAACCTCAAAAATTCCAAGGGCACCGGCAAATGCCCCTAA[CTCTCTCTCTCTCTCTCTCT]TTCTGTCTCTCTTCACCCTCCCCCCTTCCTCAACCCCTCTTCTCTTCAAAATAAACCATGTCACAATCG	CAACCTCAAAAATTCCAAGGG	60.679	0.428571	CGATTGTGACATGGTTTATTTTG	59.285	0.347826	129
isoform_124637_13022_2	TCTCTCTCTCTCTCTCTCTCTCTCTCTCTCTCTCTCTCTCTCTCTCTCTCTCTCTC	TC(2*28)	153	56	TCAACTTCGAGAATAATGCATCCA[TCTCTCTCTCTCTCTCTCTCTCTCTCTCTCTCTCTCTCTCTCTCTCTCTCTCTCTC]CCTCTCCTGCAGAAGCCTTTTCGTTGTTTGTCATCATTCAGTTCCAATG	TCAACTTCGAGAATAATGCATCC	60.453	0.391304	CATTGGAACTGAATGATGACAAA	59.853	0.347826	129
isoform_124637_13022_3	TCTCTCTCTCTCTCTCTCTCTCTCTCTCTCTCTCTCTCTCTCTCTCTCTCTCTCTC	TC(2*28)	153	56	TCAACTTCGAGAATAATGCATCCA[TCTCTCTCTCTCTCTCTCTCTCTCTCTCTCTCTCTCTCTCTCTCTCTCTCTCTCTC]CCTCTCCTGCAGAAGCCTTTTCGTTGTTTGTCATCATTCAGTTCCAATGATTGTTCATG	TCAACTTCGAGAATAATGCATCC	60.453	0.391304	CATGAACAATCATTGGAACTGAA	59.853	0.347826	139
isoform_124637_13022_5	TCTCTCTCTCTCTCTCTCTCTCTCTCTCTCTCTCTCTCTCTCTCTCTCTCTCTCTC	TC(2*28)	153	56	TAGTCTCACGTTTGTTGAAGCCTCTTTGAAGATTAGTTAATCAACTTCGAGAATAATGCATCCA[TCTCTCTCTCTCTCTCTCTCTCTCTCTCTCTCTCTCTCTCTCTCTCTCTCTCTCTC]CCTCTCCTGCAGAAGCCTTTTCGTTGTTTGTCATCATT	TAGTCTCACGTTTGTTGAAGCCT	60.341	0.434783	AATGATGACAAACAACGAAAAGG	60.263	0.347826	158
isoform_124820_13024_4	GAGAGAGAGAGAGAGA	GA(2*8)	179	16	GCAATAGCTAGAGGGGAGTGAGTGTTACCGTGCTTCCTCTGCCCTTATCCATGTGATTCTTTTGACATGTAAGTTAATTTATCATTTATTTCTGCTATCT[GAGAGAGAGAGAGAGA]GGGAGAGACAAGGAGAGAGGTGGTCAAGCACAGATA	GCAATAGCTAGAGGGGAGTGAGT	60.287	0.521739	TATCTGTGCTTGACCACCTCTCT	60.316	0.478261	152
isoform_12484_2474_2	CTCTCTCTCTCTCTCTCTCTCTCTCTCTCTCTCTCTCTCTCTCTCTCTCT	CT(2*25)	328	50	AGAATCCATGAAGCATAGCGAGGATGGAAGC[CTCTCTCTCTCTCTCTCTCTCTCTCTCTCTCTCTCTCTCTCTCTCTCTCT]CGCGGTTGCGCAGGGAACCACGGCCAACCCCTGCAATGGCAATGTCCAGAATCGGTTCTCTGTTTT	AGAATCCATGAAGCATAGCGAG	60.731	0.454545	AAAACAGAGAACCGATTCTGGAC	60.862	0.434783	147
isoform_12484_2474_4	CTCTCTCTCTCTCTCTCTCTCTCTCTCTCTCTCTCTCTCTCTCTCTCTCT	CT(2*25)	328	50	CCCAAGAATCCATGAAGCATAGCGAGGATGGAAGC[CTCTCTCTCTCTCTCTCTCTCTCTCTCTCTCTCTCTCTCTCTCTCTCTCT]CGCGGTTGCGCAGGGAACCACGGCCAACCCCTGCAATGGCAATGTCCAGAATCGGTTCTCTGTTTT	CCCAAGAATCCATGAAGCATAG	60.811	0.454545	AAAACAGAGAACCGATTCTGGAC	60.862	0.434783	151
isoform_124895_13025_3	TCTCTCTCTCTCTCTCTC	TC(2*9)	171	18	TCGCCTCTTTAGCTACGTCTGTAAAACTAAGGTCAAATTTGTTTTCTTTCATCAGCTCTCTCCTCTCTCTCCTCCTCCTCTA[TCTCTCTCTCTCTCTCTC]TGGGGTAGATCTTTGAGAGTGTCTTGGCATTCATTA	TCGCCTCTTTAGCTACGTCTGTA	60.562	0.478261	TAATGAATGCCAAGACACTCTCA	59.761	0.391304	136
isoform_124895_13025_4	TCTCTCTCTCTCTCTCTC	TC(2*9)	171	18	GAGTCGCCTCTTTAGCTACGTCTGTAAAACTAAGGTCAAATTTGTTTTCTTTCATCAGCTCTCTCCTCTCTCTCCTCCTCCTCTA[TCTCTCTCTCTCTCTCTC]TGGGGTAGATCTTTGAGAGTGTCTTGGCATTCATTA	GAGTCGCCTCTTTAGCTACGTCT	60.564	0.521739	TAATGAATGCCAAGACACTCTCA	59.761	0.391304	139
isoform_125542_13030_2	AGAGAGAGAGAGAGAGAGAGAGAGAGAG	AG(2*14)	174	28	GAGAAGCTGTGAGAGCTGAAGTCGGAGGCATCAACTGATCAACACGCGCACAAC[AGAGAGAGAGAGAGAGAGAGAGAGAGAG]CGAGCGCCCGTCAGTCGAGCTCAATTTTGTAA	GAGAAGCTGTGAGAGCTGAAGTC	59.959	0.521739	TTACAAAATTGAGCTCGACTGAC	58.576	0.391304	114
isoform_125542_13030_3	AGAGAGAGAGAGAGAGAGAGAGAGAGAG	AG(2*14)	174	28	GAGAGAAGCTGTGAGAGCTGAAGTCGGAGGCATCAACTGATCAACACGCGCACAAC[AGAGAGAGAGAGAGAGAGAGAGAGAGAG]CGAGCGCCCGTCAGTCGAGCTCAATTTTGTAA	GAGAGAAGCTGTGAGAGCTGAAG	60.089	0.521739	TTACAAAATTGAGCTCGACTGAC	58.576	0.391304	116
isoform_125542_13030_4	AGAGAGAGAGAGAGAGAGAGAGAGAGAG	AG(2*14)	174	28	GAGAAGCTGTGAGAGCTGAAGTCGGAGGCATCAACTGATCAACACGCGCACAAC[AGAGAGAGAGAGAGAGAGAGAGAGAGAG]CGAGCGCCCGTCAGTCGAGCTCAATTTTGTAAG	GAGAAGCTGTGAGAGCTGAAGTC	59.959	0.521739	CTTACAAAATTGAGCTCGACTGAC	59.496	0.416667	115
isoform_12563_2491_1	AGAGAGAGAGAGAG	AG(2*7)	177	14	CTGCTATTGCACTCCTTCAAACTTCAAGTGCAATGTGCAGCAATGATCTATTACCGCAAGTGTCGCACATCAAGATCGGCATGAGAGCTCGTT[AGAGAGAGAGAGAG]TGAGATGAGAGAGACGAGAGGTTACTCTCCTGA	CTGCTATTGCACTCCTTCAAACT	59.961	0.434783	TCAGGAGAGTAACCTCTCGTCTC	59.148	0.521739	140
isoform_12563_2491_2	AGAGAGAGAGAGAG	AG(2*7)	177	14	CTGCTATTGCACTCCTTCAAACTTCAAGTGCAATGTGCAGCAATGATCTATTACCGCAAGTGTCGCACATCAAGATCGGCATGAGAGCTCGTT[AGAGAGAGAGAGAG]TGAGATGAGAGAGACGAGAGGTTACTCTCCTG	CTGCTATTGCACTCCTTCAAACT	59.961	0.434783	CAGGAGAGTAACCTCTCGTCTCTC	60.075	0.541667	139
isoform_12563_2491_3	AGAGAGAGAGAGAG	AG(2*7)	177	14	CTGCTATTGCACTCCTTCAAACTTCAAGTGCAATGTGCAGCAATGATCTATTACCGCAAGTGTCGCACATCAAGATCGGCATGAGAGCTCGTT[AGAGAGAGAGAGAG]TGAGATGAGAGAGACGAGAGGTTACTCTCCTGA	CTGCTATTGCACTCCTTCAAACT	59.961	0.434783	TCAGGAGAGTAACCTCTCGTCTCT	60.075	0.5	140
isoform_12563_2491_4	AGAGAGAGAGAGAG	AG(2*7)	177	14	ATTTCTGCTATTGCACTCCTTCAAACTTCAAGTGCAATGTGCAGCAATGATCTATTACCGCAAGTGTCGCACATCAAGATCGGCATGAGAGCTCGTT[AGAGAGAGAGAGAG]TGAGATGAGAGAGACGAGAGGTTACTCTCCTGA	ATTTCTGCTATTGCACTCCTTCA	60.27	0.391304	TCAGGAGAGTAACCTCTCGTCTC	59.148	0.521739	144
isoform_12563_2491_5	AGAGAGAGAGAGAG	AG(2*7)	177	14	TGCTATTGCACTCCTTCAAACTTCAAGTGCAATGTGCAGCAATGATCTATTACCGCAAGTGTCGCACATCAAGATCGGCATGAGAGCTCGTT[AGAGAGAGAGAGAG]TGAGATGAGAGAGACGAGAGGTTACTCTCCTGA	TGCTATTGCACTCCTTCAAACTT	60.302	0.391304	TCAGGAGAGTAACCTCTCGTCTC	59.148	0.521739	139
isoform_125687_13032_1	TCTCTCTCTCTCTC	TC(2*7)	175	14	TCTCTCAGCGTTTTCTTTTTGAG[TCTCTCTCTCTCTC]ATTTGCTTCCGCCTTCCCACTCACATGGTGCTAAGGTGATTACGTTTGTGTTTCTCACACAAGGCAAGGATGTGGTATGAGATGTGA	TCTCTCAGCGTTTTCTTTTTGAG	60.169	0.391304	TCACATCTCATACCACATCCTTG	59.867	0.434783	124
isoform_125687_13032_2	TCTCTCTCTCTCTC	TC(2*7)	175	14	TCTCTCAGCGTTTTCTTTTTGAG[TCTCTCTCTCTCTC]ATTTGCTTCCGCCTTCCCACTCACATGGTGCTAAGGTGATTACGT	TCTCTCAGCGTTTTCTTTTTGAG	60.169	0.391304	ACGTAATCACCTTAGCACCATGT	59.839	0.434783	82
isoform_125687_13032_3	TCTCTCTCTCTCTC	TC(2*7)	175	14	TGTGTATTTGTAGAGGAGGAGCCCCCTGTGGGGGGTCGCCTAAGCGTGATGGTCATGATGCTTGGGCTGCCATGCCCATCTCTCAGCGTTTTCTTTTTGAG[TCTCTCTCTCTCTC]ATTTGCTTCCGCCTTCCCACTCACATGGTGCTAAGGTGATT	TGTGTATTTGTAGAGGAGGAGCC	59.666	0.478261	AATCACCTTAGCACCATGTGAGT	59.942	0.434783	156
isoform_125687_13032_4	TCTCTCTCTCTCTC	TC(2*7)	175	14	GTGTATTTGTAGAGGAGGAGCCCCCTGTGGGGGGTCGCCTAAGCGTGATGGTCATGATGCTTGGGCTGCCATGCCCATCTCTCAGCGTTTTCTTTTTGAG[TCTCTCTCTCTCTC]ATTTGCTTCCGCCTTCCCACTCACATGGTGCTAAGGTGATT	GTGTATTTGTAGAGGAGGAGCCC	60.373	0.521739	AATCACCTTAGCACCATGTGAGT	59.942	0.434783	155
isoform_125687_13032_5	TCTCTCTCTCTCTC	TC(2*7)	175	14	CATCTCTCAGCGTTTTCTTTTTGAG[TCTCTCTCTCTCTC]ATTTGCTTCCGCCTTCCCACTCACATGGTGCTAAGGTGATT	CATCTCTCAGCGTTTTCTTTTTG	60.4	0.391304	AATCACCTTAGCACCATGTGAGT	59.942	0.434783	80
isoform_1257_218_5	GCGCGCGCGCGC	GC(2*6)	209	12	CACAGAGATTTTCCTTGGTTCAATTGCTCGACTTTGTGTGTGCTGTTGGATTTGTCT[GCGCGCGCGCGC]ACGCTCTTGGGAAAGTTCTTCTCAT	CACAGAGATTTTCCTTGGTTCAA	60.5	0.391304	ATGAGAAGAACTTTCCCAAGAGC	60.248	0.434783	94
isoform_12581_2497_1	CACCACCACCACCACCAC	CAC(3*6)	168	18	ATTTCGGTTCTTAAAACCCCTCTTCCTTCCCATACTTCTCTAGTTCTCATTCAAGTCTGTGCAA[CACCACCACCACCACCAC]ATCTCTCTTCTTCTTCACCATGCTCTCCCCTCCTCTCAGAGGCAGCTCTCCTTCATCATCATTTCTTTGG	ATTTCGGTTCTTAAAACCCCTCT	60.542	0.391304	CCAAAGAAATGATGATGAAGGAG	59.952	0.391304	152
isoform_12581_2497_2	CACCACCACCACCACCAC	CAC(3*6)	168	18	ATTTCGGTTCTTAAAACCCCTCTTCCTTCCCATACTTCTCTAGTTCTCATTCAAGTCTGTGCAA[CACCACCACCACCACCAC]ATCTCTCTTCTTCTTCACCATGCTCTCCCCTCCTCTCAGAGGCAGCTCTCCTTCATCATCATTTCTTTGGAG	ATTTCGGTTCTTAAAACCCCTCT	60.542	0.391304	CTCCAAAGAAATGATGATGAAGG	59.952	0.391304	154
isoform_12581_2497_4	CACCACCACCACCACCAC	CAC(3*6)	168	18	ATTTCGGTTCTTAAAACCCCTCTTCCTTCCCATACTTCTCTAGTTCTCATTCAAGTCTGTGCAA[CACCACCACCACCACCAC]ATCTCTCTTCTTCTTCACCATGCTCTCCCCTCCTCTCAGAGGCAGCTCTCCTTCATCATCATTTC	ATTTCGGTTCTTAAAACCCCTCT	60.542	0.391304	GAAATGATGATGAAGGAGAGCTG	60.222	0.434783	147
isoform_12603_2504_5	AGAAGAAGAAGAAGA	AGA(3*5)	1228	15	GACAAGTCAATCAAGCGAAGTTTGAGCAAAAGGGTGATGTTTTTATTAAAAAGGAGCAAAACAAGC[AGAAGAAGAAGAAGA]TCAAGCACGCAGAGCAGAAGGCCCTCGGTTGGGGTGGTTTTGACGATGCAAGAAAA	GACAAGTCAATCAAGCGAAGTTT	59.818	0.391304	TTTTCTTGCATCGTCAAAACC	60.103	0.380952	137
isoform_12606_2505_1	TGTGTGTGTGTGTGTGTGTGTGTGTGTGTGTGTG	TG(2*17)	266	34	GGAAATGGAATTTAACGTGTTCCGTTC[TGTGTGTGTGTGTGTGTGTGTGTGTGTGTGTGTG]AGTGAGTGAGTGAGAGATATACCCAGAAAGACGAAATATGTAATGACAAGGCTAGAACTAAAGCTAAGGCCGGAAGGAATGACCGACTGGAGTATACA	GGAAATGGAATTTAACGTGTTCC	60.772	0.391304	TGTATACTCCAGTCGGTCATTCC	60.256	0.478261	159
isoform_12606_2505_2	TGTGTGTGTGTGTGTGTGTGTGTGTGTGTGTGTG	TG(2*17)	266	34	GGGAAATGGAATTTAACGTGTTCCGTTC[TGTGTGTGTGTGTGTGTGTGTGTGTGTGTGTGTG]AGTGAGTGAGTGAGAGATATACCCAGAAAGACGAAATATGTAATGACAAGGCTAGAACTAAAGCTAAGGCCGGAAGGAATGACCGACTGGAGTATACA	GGGAAATGGAATTTAACGTGTTC	60.772	0.391304	TGTATACTCCAGTCGGTCATTCC	60.256	0.478261	160
isoform_12606_2505_3	TGTGTGTGTGTGTGTGTGTGTGTGTGTGTGTGTG	TG(2*17)	266	34	AAATGGAATTTAACGTGTTCCGTTC[TGTGTGTGTGTGTGTGTGTGTGTGTGTGTGTGTG]AGTGAGTGAGTGAGAGATATACCCAGAAAGACGAAATATGTAATGACAAGGCTAGAACTAAAGCTAAGGCCGGAAGGAATGACCGACTGGAGTATACA	AAATGGAATTTAACGTGTTCCGT	60.816	0.347826	TGTATACTCCAGTCGGTCATTCC	60.256	0.478261	157
isoform_12606_2505_4	TGTGTGTGTGTGTGTGTGTGTGTGTGTGTGTGTG	TG(2*17)	266	34	AAATGGAATTTAACGTGTTCCGTTC[TGTGTGTGTGTGTGTGTGTGTGTGTGTGTGTGTG]AGTGAGTGAGTGAGAGATATACCCAGAAAGACGAAATATGTAATGACAAGGCTAGAACTAAAGCTAAGGCCGGAAGGAATGACCGACTGGAGTATACA	AAATGGAATTTAACGTGTTCCG	60.108	0.363636	TGTATACTCCAGTCGGTCATTCC	60.256	0.478261	157
isoform_12606_2505_5	TGTGTGTGTGTGTGTGTGTGTGTGTGTGTGTGTG	TG(2*17)	266	34	GGAAATGGAATTTAACGTGTTCCGTTC[TGTGTGTGTGTGTGTGTGTGTGTGTGTGTGTGTG]AGTGAGTGAGTGAGAGATATACCCAGAAAGACGAAATATGTAATGACAAGGCTAGAACTAAAGCTAAGGCCGGAAGGAATGACCGACTGGAGTAT	GGAAATGGAATTTAACGTGTTCC	60.772	0.391304	ATACTCCAGTCGGTCATTCCTTC	60.727	0.478261	156
isoform_12667_2519_1	GAGAGAGAGAGAGAGAGAGAGAGA	GA(2*12)	188	24	TTGGAAACCTTCCTTTGTGTTTAAAGTTACATAAGCATCTTCTCTGTACCCATTTATGTGAGTGCATTT[GAGAGAGAGAGAGAGAGAGAGAGA]GCATTAGACCATGATCAGAGATAACTGCTACCCACAAGCATCTTCTTCATT	TTGGAAACCTTCCTTTGTGTTTA	59.9	0.347826	AATGAAGAAGATGCTTGTGGGTA	60.014	0.391304	144
isoform_12667_2519_2	GAGAGAGAGAGAGAGAGAGAGAGA	GA(2*12)	188	24	TTGGAAACCTTCCTTTGTGTTTAAAGTTACATAAGCATCTTCTCTGTACCCATTTATGTGAGTGCATTT[GAGAGAGAGAGAGAGAGAGAGAGA]GCATTAGACCATGATCAGAGATAACTGCTACCCACAAGCATC	TTGGAAACCTTCCTTTGTGTTTA	59.9	0.347826	GATGCTTGTGGGTAGCAGTTATC	60.041	0.478261	135
isoform_12667_2519_3	GAGAGAGAGAGAGAGAGAGAGAGA	GA(2*12)	188	24	TTGGAAACCTTCCTTTGTGTTTAAAGTTACATAAGCATCTTCTCTGTACCCATTTATGTGAGTGCATTT[GAGAGAGAGAGAGAGAGAGAGAGA]GCATTAGACCATGATCAGAGATAACTGCTACCCACAAGCATCTT	TTGGAAACCTTCCTTTGTGTTTA	59.9	0.347826	AAGATGCTTGTGGGTAGCAGTTA	60.195	0.434783	137
isoform_12667_2519_4	GAGAGAGAGAGAGAGAGAGAGAGA	GA(2*12)	188	24	TTGGAAACCTTCCTTTGTGTTTAAAGTTACATAAGCATCTTCTCTGTACCCATTTATGTGAGTGCATTT[GAGAGAGAGAGAGAGAGAGAGAGA]GCATTAGACCATGATCAGAGATAACTGCTACCCACAAGCATCTTCTTCAT	TTGGAAACCTTCCTTTGTGTTTA	59.9	0.347826	ATGAAGAAGATGCTTGTGGGTAG	59.666	0.434783	143
isoform_12667_2519_5	GAGAGAGAGAGAGAGAGAGAGAGA	GA(2*12)	188	24	GTTGGAAACCTTCCTTTGTGTTTAAAGTTACATAAGCATCTTCTCTGTACCCATTTATGTGAGTGCATTT[GAGAGAGAGAGAGAGAGAGAGAGA]GCATTAGACCATGATCAGAGATAACTGCTACCCACAAGCATCTTCTTCATT	GTTGGAAACCTTCCTTTGTGTTT	60.623	0.391304	AATGAAGAAGATGCTTGTGGGTA	60.014	0.391304	145
isoform_1275_223_1	TCTCTCTCTCTC	TC(2*6)	217	12	CACACATTCTCTCTGTCTCTGTCACTCTCTAATT[TCTCTCTCTCTC]TTCCTGCGATTCTCTTTCGAAACGGAAGCCCGACAGCGCTAGCGACCTAATGCCCACTTTCCCGCTTTTTCCAGAGAAAGGCACAGGTAGTTCGTGTTTGTAATTGTGGGTT	CACACATTCTCTCTGTCTCTGTCA	59.566	0.458333	AACCCACAATTACAAACACGAAC	60.069	0.391304	158
isoform_1275_223_2	TCTCTCTCTCTC	TC(2*6)	217	12	CCACAAACAAACACACATTCTCTCTGTCTCTGTCACTCTCTAATT[TCTCTCTCTCTC]TTCCTGCGATTCTCTTTCGAAACGGAAGCCCGACAGCGCTAGCGACCTAATGCCCACTTTCCCGCTTTTTCCAGAGAAAGGCACAGGTAGTTCGT	CCACAAACAAACACACATTCTCT	59.063	0.391304	ACGAACTACCTGTGCCTTTCTCT	60.696	0.478261	152
isoform_1275_223_3	TCTCTCTCTCTC	TC(2*6)	217	12	CCACAAACAAACACACATTCTCTCTGTCTCTGTCACTCTCTAATT[TCTCTCTCTCTC]TTCCTGCGATTCTCTTTCGAAACGGAAGCCCGACAGCGCTAGCGACCTAATGCCCACTTTCCCGCTTTTTCCAGAGAAAGGCACAGGTAGTTCGTGTTTGTAA	CCACAAACAAACACACATTCTCT	59.063	0.391304	TTACAAACACGAACTACCTGTGC	59.255	0.434783	160
isoform_1275_223_4	TCTCTCTCTCTC	TC(2*6)	217	12	CACACATTCTCTCTGTCTCTGTCACTCTCTAATT[TCTCTCTCTCTC]TTCCTGCGATTCTCTTTCGAAACGGAAGCCCGACAGCGCTAGCGACCTAATGCCCACTTTCCCGCTTTTTCCAGAGAAAGGCACAGGTAGTTCGTGTTTGTAATTGTGGGT	CACACATTCTCTCTGTCTCTGTCA	59.566	0.458333	ACCCACAATTACAAACACGAACT	59.725	0.391304	157
isoform_1275_223_5	TCTCTCTCTCTC	TC(2*6)	217	12	GCCACAAACAAACACACATTCTCTCTGTCTCTGTCACTCTCTAATT[TCTCTCTCTCTC]TTCCTGCGATTCTCTTTCGAAACGGAAGCCCGACAGCGCTAGCGACCTAATGCCCACTTTCCCGCTTTTTCCAGAGAAAGGCACAGGTAGTTCGT	GCCACAAACAAACACACATTCT	59.943	0.409091	ACGAACTACCTGTGCCTTTCTCT	60.696	0.478261	153
isoform_12871_2555_1	CTCTCTCTCTCTCTCTCTCTCTCTCTCT	CT(2*14)	168	28	CTTATCATTCATGCGACTCTGGTGCGAGTCACCATTGTTGCTCTTCAATAGACAG[CTCTCTCTCTCTCTCTCTCTCTCTCTCT]CGCATAATGGTTAACGGCAAAGGGCAATGCAGATATATGT	CTTATCATTCATGCGACTCTGGT	60.517	0.434783	ACATATATCTGCATTGCCCTTTG	60.233	0.391304	123
isoform_12871_2555_2	CTCTCTCTCTCTCTCTCTCTCTCTCTCT	CT(2*14)	168	28	CTTATCATTCATGCGACTCTGGTGCGAGTCACCATTGTTGCTCTTCAATAGACAG[CTCTCTCTCTCTCTCTCTCTCTCTCTCT]CGCATAATGGTTAACGGCAAAGGGCAATGCAGATATATGTTG	CTTATCATTCATGCGACTCTGGT	60.517	0.434783	CAACATATATCTGCATTGCCCTT	60.233	0.391304	125
isoform_12871_2555_3	CTCTCTCTCTCTCTCTCTCTCTCTCTCT	CT(2*14)	168	28	ACTTATCATTCATGCGACTCTGGTGCGAGTCACCATTGTTGCTCTTCAATAGACAG[CTCTCTCTCTCTCTCTCTCTCTCTCTCT]CGCATAATGGTTAACGGCAAAGGGCAATGCAGATATATGT	ACTTATCATTCATGCGACTCTGG	60.517	0.434783	ACATATATCTGCATTGCCCTTTG	60.233	0.391304	124
isoform_12871_2555_4	CTCTCTCTCTCTCTCTCTCTCTCTCTCT	CT(2*14)	168	28	ACTTATCATTCATGCGACTCTGGTGCGAGTCACCATTGTTGCTCTTCAATAGACAG[CTCTCTCTCTCTCTCTCTCTCTCTCTCT]CGCATAATGGTTAACGGCAAAGGGCAATGCAGATATATGTTG	ACTTATCATTCATGCGACTCTGG	60.517	0.434783	CAACATATATCTGCATTGCCCTT	60.233	0.391304	126
isoform_12905_2559_1	CCCCCCCCCCCCCCC	C(1*15)	1864	15	GCCCCAAGCTTAGATAATGGTATATAAAGAGAACCAACCAACAACAACACACCCCCCCCCCCCCCCACACACCCCCAACCAAGAAAAA[ACACACACACACACACACACAC]CCAATACAAAAGCAACACATGCACAC	GCCCCAAGCTTAGATAATGGTAT	59.76	0.434783	GTGTGCATGTGTTGCTTTTGTAT	59.983	0.391304	136
isoform_12905_2560_1	ACACACACACACACACACACAC	AC(2*11)	1901	22	GCCCCAAGCTTAGATAATGGTATATAAAGAGAACCAACCAACAACAACACACCCCCCCCCCCCCCCACACACCCCCAACCAAGAAAAA[ACACACACACACACACACACAC]CCAATACAAAAGCAACACATGCACAC	GCCCCAAGCTTAGATAATGGTAT	59.76	0.434783	GTGTGCATGTGTTGCTTTTGTAT	59.983	0.391304	136
isoform_12905_2560_5	ACACACACACACACACACACAC	AC(2*11)	1901	22	GCCCCAAGCTTAGATAATGGTATATAAAGAGAACCAACCAACAACAACACACCCCCCCCCCCCCCCACACACCCCCAACCAAGAAAAA[ACACACACACACACACACACAC]CCAATACAAAAGCAACACATGCAC	GCCCCAAGCTTAGATAATGGTAT	59.76	0.434783	GTGCATGTGTTGCTTTTGTATTG	60.463	0.391304	134
isoform_13016_2570_1	AGGAGGAGGAGGAGGAGG	AGG(3*6)	924	18	GAAATGGGGTGCATCATAGACCGCAGGGTGGAGGCCCTCCAATCCGCCGGAGCTGCGGCCGCCCCCGTGACCC[AGGAGGAGGAGGAGGAGG]ATGTGCATCTCCATGCTCCCTCAAGGCTAAAGGATG	GAAATGGGGTGCATCATAGAC	59.263	0.47619	CATCCTTTAGCCTTGAGGGAG	60.207	0.52381	127
isoform_13016_2570_2	AGGAGGAGGAGGAGGAGG	AGG(3*6)	924	18	GAAATGGGGTGCATCATAGACCGCAGGGTGGAGGCCCTCCAATCCGCCGGAGCTGCGGCCGCCCCCGTGACCC[AGGAGGAGGAGGAGGAGG]ATGTGCATCTCCATGCTCCCTCAAGGCTAAAGGATGAG	GAAATGGGGTGCATCATAGAC	59.263	0.47619	CTCATCCTTTAGCCTTGAGGG	60.207	0.52381	129
isoform_13016_2570_3	AGGAGGAGGAGGAGGAGG	AGG(3*6)	924	18	GAAATGGGGTGCATCATAGACCGCAGGGTGGAGGCCCTCCAATCCGCCGGAGCTGCGGCCGCCCCCGTGACCC[AGGAGGAGGAGGAGGAGG]ATGTGCATCTCCATGCTCCCTCAAGGCTAAAGGATGAGGG	GAAATGGGGTGCATCATAGAC	59.263	0.47619	CCCTCATCCTTTAGCCTTGAG	60.207	0.52381	131
isoform_13016_2570_4	AGGAGGAGGAGGAGGAGG	AGG(3*6)	924	18	CTTGCAGGGCGATTTACTTCGCCGGGAAATGGGGTGCATCATAGACCGCAGGGTGGAGGCCCTCCAATCCGCCGGAGCTGCGGCCGCCCCCGTGACCC[AGGAGGAGGAGGAGGAGG]ATGTGCATCTCCATGCTCCCTCAAGGCTAAAGGATG	CTTGCAGGGCGATTTACTTC	59.845	0.5	CATCCTTTAGCCTTGAGGGAG	60.207	0.52381	152
isoform_13016_2570_5	AGGAGGAGGAGGAGGAGG	AGG(3*6)	924	18	CTTGCAGGGCGATTTACTTCGCCGGGAAATGGGGTGCATCATAGACCGCAGGGTGGAGGCCCTCCAATCCGCCGGAGCTGCGGCCGCCCCCGTGACCC[AGGAGGAGGAGGAGGAGG]ATGTGCATCTCCATGCTCCCTCAAGGCTAAAGGATGAG	CTTGCAGGGCGATTTACTTC	59.845	0.5	CTCATCCTTTAGCCTTGAGGG	60.207	0.52381	154
isoform_13167_2593_2	GAGGAGGAGGAGGAG	GAG(3*5)	273	15	GAAGAGGAGGAGGAAGAGGAA[GAGGAGGAGGAGGAG]GATCTCTCAGAGGAAATGGCCCTTCAATCCCACACATTGGAAAAGATAGGCAGCTGGAGGCTGAGTGTCGACAATGGCAGCTCAGGCGGTACATCGAGCTCTGTAAGGCTACA	GAAGAGGAGGAGGAAGAGGAAG	59.957	0.545455	TGTAGCCTTACAGAGCTCGATGT	60.458	0.478261	149
isoform_13167_2593_3	GAGGAGGAGGAGGAG	GAG(3*5)	273	15	GAAGAGGAGGAGGAAGAGGAA[GAGGAGGAGGAGGAG]GATCTCTCAGAGGAAATGGCCCTTCAATCCCACACATTGGAAAAGATAGGCAGCTGGAGGCTGAGTGTCGACAATGGCAGCTCAGGCGGTACATCGAGCTCTGTAAGGCTACAG	GAAGAGGAGGAGGAAGAGGAAG	59.957	0.545455	CTGTAGCCTTACAGAGCTCGATG	60.578	0.521739	150
isoform_133069_13049_1	AACAACAACAACAACAACAACAACAAC	AAC(3*9)	1150	27	TTCAGCAAACCCAGTAAGGATTAAAGATCGTATTTACCATCATATAAACGACGGTGCAGGACCTTTTCACA[AACAACAACAACAACAACAACAACAAC]AGGAAATGGTGGAACAATCATTAG	TTCAGCAAACCCAGTAAGGATTA	60.01	0.391304	CTAATGATTGTTCCACCATTTCC	59.601	0.391304	122
isoform_133069_13049_2	AACAACAACAACAACAACAACAACAAC	AAC(3*9)	1150	27	TATTTCAGCAAACCCAGTAAGGATTAAAGATCGTATTTACCATCATATAAACGACGGTGCAGGACCTTTTCACA[AACAACAACAACAACAACAACAACAAC]AGGAAATGGTGGAACAATCATTAG	TATTTCAGCAAACCCAGTAAGGA	60.01	0.391304	CTAATGATTGTTCCACCATTTCC	59.601	0.391304	125
isoform_133069_13049_3	AACAACAACAACAACAACAACAACAAC	AAC(3*9)	1150	27	ATTTCAGCAAACCCAGTAAGGATTAAAGATCGTATTTACCATCATATAAACGACGGTGCAGGACCTTTTCACA[AACAACAACAACAACAACAACAACAAC]AGGAAATGGTGGAACAATCATTAG	ATTTCAGCAAACCCAGTAAGGAT	60.243	0.391304	CTAATGATTGTTCCACCATTTCC	59.601	0.391304	124
isoform_133069_13049_5	AACAACAACAACAACAACAACAACAAC	AAC(3*9)	1150	27	CAGCAAACCCAGTAAGGATTAAAGATCGTATTTACCATCATATAAACGACGGTGCAGGACCTTTTCACA[AACAACAACAACAACAACAACAACAAC]AGGAAATGGTGGAACAATCATTAG	CAGCAAACCCAGTAAGGATTAAA	59.564	0.391304	CTAATGATTGTTCCACCATTTCC	59.601	0.391304	120
isoform_133117_13059_1	TCATCATCATCATCA	TCA(3*5)	760	15	GATTAGTGCGTCAACATCTCCTTGTCATCATCGTCATCG[TCATCATCATCATCA]TCCTCGCCATTTGCAACGTCATCATCCCCTGATCAGTCAAGAGCGGTGTTAGATGCTCATGACCGAAGAG	GATTAGTGCGTCAACATCTCCTT	59.672	0.434783	CTCTTCGGTCATGAGCATCTAAC	60.276	0.478261	124
isoform_133117_13059_3	TCATCATCATCATCA	TCA(3*5)	760	15	ATCTCCTTGTCATCATCGTCATCG[TCATCATCATCATCA]TCCTCGCCATTTGCAACGTCATCATCCCCTGATCAGTCAAGAGCGGTGTTAGATGCTCATGACCGAAGAG	ATCTCCTTGTCATCATCGTCATC	60.35	0.434783	CTCTTCGGTCATGAGCATCTAAC	60.276	0.478261	109
isoform_133149_13066_1	TCTCTCTCTCTC	TC(2*6)	1821	12	CAGATTTTGTCATTTGAGCCATAAAGAAATTTCTCTGTTACAGAACAGCAGTGTGCCCCGCCTCTCTCTCTCATCTCT[TCTCTCTCTCTC]GTCCTCTCTCTTGTGTGTTCAAGGTTGTGAGATC	CAGATTTTGTCATTTGAGCCATA	59.133	0.347826	GATCTCACAACCTTGAACACACA	60.066	0.434783	124
isoform_133149_13066_2	TCTCTCTCTCTC	TC(2*6)	1821	12	CAGATTTTGTCATTTGAGCCATAAAGAAATTTCTCTGTTACAGAACAGCAGTGTGCCCCGCCTCTCTCTCTCATCTCT[TCTCTCTCTCTC]GTCCTCTCTCTTGTGTGTTCAAGGTTGTGAGATCA	CAGATTTTGTCATTTGAGCCATA	59.133	0.347826	TGATCTCACAACCTTGAACACAC	60.066	0.434783	125
isoform_133149_13066_4	TCTCTCTCTCTC	TC(2*6)	1821	12	TTTTGTCATTTGAGCCATAAAGAAATTTCTCTGTTACAGAACAGCAGTGTGCCCCGCCTCTCTCTCTCATCTCT[TCTCTCTCTCTC]GTCCTCTCTCTTGTGTGTTCAAGGTTGTGAGATC	TTTTGTCATTTGAGCCATAAAGAA	60.006	0.291667	GATCTCACAACCTTGAACACACA	60.066	0.434783	120
isoform_133149_13066_5	TCTCTCTCTCTC	TC(2*6)	1821	12	TTTTGTCATTTGAGCCATAAAGAAATTTCTCTGTTACAGAACAGCAGTGTGCCCCGCCTCTCTCTCTCATCTCT[TCTCTCTCTCTC]GTCCTCTCTCTTGTGTGTTCAAGGTTGTGAGATCA	TTTTGTCATTTGAGCCATAAAGAA	60.006	0.291667	TGATCTCACAACCTTGAACACAC	60.066	0.434783	121
isoform_133181_13069_1	GACGACGACGACGACGAC	GAC(3*6)	426	18	GTGATGTTGATGACAATGCCTACGGCAACTATGACGGTAGCGGGCATTGCAAT[GACGACGACGACGACGAC]GATAGCAATGGGCGTTTGCATACTCCCGAGCCTCGCTCCGTGTCTTACCTCTACCTCA	GTGATGTTGATGACAATGCCTAC	59.378	0.434783	TGAGGTAGAGGTAAGACACGGAG	59.818	0.521739	129
isoform_133181_13069_2	GACGACGACGACGACGAC	GAC(3*6)	426	18	GTGATGTTGATGACAATGCCTACGGCAACTATGACGGTAGCGGGCATTGCAAT[GACGACGACGACGACGAC]GATAGCAATGGGCGTTTGCATACTCCCGAGCCTCGCTCCGTGTCTTACCTCTACCTCAG	GTGATGTTGATGACAATGCCTAC	59.378	0.434783	CTGAGGTAGAGGTAAGACACGGA	59.818	0.521739	130
isoform_133181_13069_3	GACGACGACGACGACGAC	GAC(3*6)	426	18	ACATGTGATGTTGATGACAATGCCTACGGCAACTATGACGGTAGCGGGCATTGCAAT[GACGACGACGACGACGAC]GATAGCAATGGGCGTTTGCATACTCCCGAGCCTCGCTCCGTGTCTTACCTCTACCTCA	ACATGTGATGTTGATGACAATGC	60.703	0.391304	TGAGGTAGAGGTAAGACACGGAG	59.818	0.521739	133
isoform_133181_13069_4	GACGACGACGACGACGAC	GAC(3*6)	426	18	ACATGTGATGTTGATGACAATGCCTACGGCAACTATGACGGTAGCGGGCATTGCAAT[GACGACGACGACGACGAC]GATAGCAATGGGCGTTTGCATACTCCCGAGCCTCGCTCCGTGTCTTACCTCTACCTCAG	ACATGTGATGTTGATGACAATGC	60.703	0.391304	CTGAGGTAGAGGTAAGACACGGA	59.818	0.521739	134
isoform_133181_13069_5	GACGACGACGACGACGAC	GAC(3*6)	426	18	GCACATGTGATGTTGATGACAATGCCTACGGCAACTATGACGGTAGCGGGCATTGCAAT[GACGACGACGACGACGAC]GATAGCAATGGGCGTTTGCATACTCCCGAGCCTCGCTCCGTGTCTTACCTCTACCTCA	GCACATGTGATGTTGATGACAAT	60.703	0.391304	TGAGGTAGAGGTAAGACACGGAG	59.818	0.521739	135
isoform_133221_13072_5	ACACACACACACACACAC	AC(2*9)	222	18	TCTTTCAATTACTACAGCCTCGCTGCAATCGGCA[ACACACACACACACACAC]AGAGCCGGGCACAAAAGTCCTACACAGAGAACCTCATTCCTACCA	TCTTTCAATTACTACAGCCTCGC	59.932	0.434783	TGGTAGGAATGAGGTTCTCTGTG	60.534	0.478261	97
isoform_133268_13075_1	GAGAGAGAGAGAGA	GA(2*7)	460	14	TTGAGATTTGCAGAGTAGGCAAGCGT[GAGAGAGAGAGAGA]GTTCGCAGATGTTGCTCGTGCGTTAAGGGCACGATTTTCAATAATTCT	TTGAGATTTGCAGAGTAGGCAAG	60.9	0.434783	AGAATTATTGAAAATCGTGCCCT	60.208	0.347826	88
isoform_133268_13075_2	GAGAGAGAGAGAGA	GA(2*7)	460	14	TTGAGATTTGCAGAGTAGGCAAGCGT[GAGAGAGAGAGAGA]GTTCGCAGATGTTGCTCGTGCGTTAAGGGCACGATTTTCAATAATTC	TTGAGATTTGCAGAGTAGGCAAG	60.9	0.434783	GAATTATTGAAAATCGTGCCCTT	60.527	0.347826	87
isoform_133268_13075_3	GAGAGAGAGAGAGA	GA(2*7)	460	14	TTGAGATTTGCAGAGTAGGCAAGCGT[GAGAGAGAGAGAGA]GTTCGCAGATGTTGCTCGTGCGTTAAGGGCACGATTTTCAATAATTCTT	TTGAGATTTGCAGAGTAGGCAAG	60.9	0.434783	AAGAATTATTGAAAATCGTGCCC	60.527	0.347826	89
isoform_133268_13075_4	GAGAGAGAGAGAGA	GA(2*7)	460	14	TTGAGATTTGCAGAGTAGGCAAGCGT[GAGAGAGAGAGAGA]GTTCGCAGATGTTGCTCGTGCGTTAAGGGCACGATTTTCAATAA	TTGAGATTTGCAGAGTAGGCAAG	60.9	0.434783	TTATTGAAAATCGTGCCCTTAAC	59.428	0.347826	84
isoform_133268_13075_5	GAGAGAGAGAGAGA	GA(2*7)	460	14	TGAGATTTGCAGAGTAGGCAAGCGT[GAGAGAGAGAGAGA]GTTCGCAGATGTTGCTCGTGCGTTAAGGGCACGATTTTCAATAATTCT	TGAGATTTGCAGAGTAGGCAAG	59.654	0.454545	AGAATTATTGAAAATCGTGCCCT	60.208	0.347826	87
isoform_133271_13078_1	AGAGAGAGAGAGAGAGAGAGAGAG	AG(2*12)	612	24	ATGGTGGAGCTAAATTGAGGAACGCCAGAAGAAGGA[AGAGAGAGAGAGAGAGAGAGAGAG]ACATTTGGCATCTACCTCTGCT	ATGGTGGAGCTAAATTGAGGAAC	60.707	0.434783	AGCAGAGGTAGATGCCAAATG	59.35	0.47619	82
isoform_133271_13078_2	AGAGAGAGAGAGAGAGAGAGAGAG	AG(2*12)	612	24	ATGGTGGAGCTAAATTGAGGAACGCCAGAAGAAGGA[AGAGAGAGAGAGAGAGAGAGAGAG]ACATTTGGCATCTACCTCTGCTG	ATGGTGGAGCTAAATTGAGGAAC	60.707	0.434783	CAGCAGAGGTAGATGCCAAAT	59.35	0.47619	83
isoform_133271_13078_3	AGAGAGAGAGAGAGAGAGAGAGAG	AG(2*12)	612	24	ATGGTGGAGCTAAATTGAGGAACGCCAGAAGAAGGA[AGAGAGAGAGAGAGAGAGAGAGAG]ACATTTGGCATCTACCTCTGCTGCGGGTGTGCGAGTAGAGCTGGCTGAGAAC	ATGGTGGAGCTAAATTGAGGAA	59.966	0.409091	GTTCTCAGCCAGCTCTACTCG	59.391	0.571429	112
isoform_133271_13078_4	AGAGAGAGAGAGAGAGAGAGAGAG	AG(2*12)	612	24	ATGGTGGAGCTAAATTGAGGAACGCCAGAAGAAGGA[AGAGAGAGAGAGAGAGAGAGAGAG]ACATTTGGCATCTACCTCTGCT	ATGGTGGAGCTAAATTGAGGAA	59.966	0.409091	AGCAGAGGTAGATGCCAAATG	59.35	0.47619	82
isoform_133271_13078_5	AGAGAGAGAGAGAGAGAGAGAGAG	AG(2*12)	612	24	ATGGTGGAGCTAAATTGAGGAACGCCAGAAGAAGGA[AGAGAGAGAGAGAGAGAGAGAGAG]ACATTTGGCATCTACCTCTGCTG	ATGGTGGAGCTAAATTGAGGAA	59.966	0.409091	CAGCAGAGGTAGATGCCAAAT	59.35	0.47619	83
isoform_133360_13094_1	GAGAGAGAGAGAGAGAGAGAGA	GA(2*11)	240	22	CTGCAATAGCATAGAGGTGAAG[GAGAGAGAGAGAGAGAGAGAGA]ACGTCAACGCCTTCTTCACAATGCCAGTCTTTACAGGCATCTGCTGAATGTTCCGTTCATCCAGCACCTAGCAAGAGCATCTTGGCAGAAGTACAATGCACCTTGTTTCC	CTGCAATAGCATAGAGGTGAAGG	60.282	0.478261	GGAAACAAGGTGCATTGTACTTC	59.926	0.434783	154
isoform_133360_13094_2	GAGAGAGAGAGAGAGAGAGAGA	GA(2*11)	240	22	CTGCAATAGCATAGAGGTGAAG[GAGAGAGAGAGAGAGAGAGAGA]ACGTCAACGCCTTCTTCACAATGCCAGTCTTTACAGGCATCTGCTGAATGTTCCGTTCATCCAGCACCTAGCAAGAGCATCTTGGCAGAAGTACAATGCACCTTGTTTCCAT	CTGCAATAGCATAGAGGTGAAGG	60.282	0.478261	ATGGAAACAAGGTGCATTGTACT	59.818	0.391304	156
isoform_133360_13094_3	GAGAGAGAGAGAGAGAGAGAGA	GA(2*11)	240	22	CTGCAATAGCATAGAGGTGAAG[GAGAGAGAGAGAGAGAGAGAGA]ACGTCAACGCCTTCTTCACAATGCCAGTCTTTACAGGCATCTGCTGAATGTTCCGTTCATCCAGCACCTAGCAAGAGCATCTTGGCAGAAGTACAAT	CTGCAATAGCATAGAGGTGAAGG	60.282	0.478261	ATTGTACTTCTGCCAAGATGCTC	59.803	0.434783	141
isoform_133360_13094_4	GAGAGAGAGAGAGAGAGAGAGA	GA(2*11)	240	22	GGTCTGCAATAGCATAGAGGTGAAG[GAGAGAGAGAGAGAGAGAGAGA]ACGTCAACGCCTTCTTCACAATGCCAGTCTTTACAGGCATCTGCTGAATGTTCCGTTCATCCAGCACCTAGCAAGAGCATCTTGGCAGAAGTACAATGCACCTTGTTTCC	GGTCTGCAATAGCATAGAGGTGA	60.646	0.478261	GGAAACAAGGTGCATTGTACTTC	59.926	0.434783	157
isoform_133360_13094_5	GAGAGAGAGAGAGAGAGAGAGA	GA(2*11)	240	22	CTGCAATAGCATAGAGGTGAAG[GAGAGAGAGAGAGAGAGAGAGA]ACGTCAACGCCTTCTTCACAATGCCAGTCTTTACAGGCATCTGCTGAA	CTGCAATAGCATAGAGGTGAAGG	60.282	0.478261	TTCAGCAGATGCCTGTAAAGACT	60.438	0.434783	92
isoform_133364_13097_1	ACACACACACACACAC	AC(2*8)	183	16	ATTTCCGCTTCTCTTCACTTTGTCTTCTGCAACCACCATAGCTGCCAATCCCCTACCCCTCTTGGTCCCCCA[ACACACACACACACAC]ATTCTCCTTTGAGGGCCCGCCATAAGCTTTTCCATGGCTGCTTCTCCACAACACGAAGCTC	ATTTCCGCTTCTCTTCACTTTGT	60.631	0.391304	GAGCTTCGTGTTGTGGAGAAG	60.043	0.52381	149
isoform_133364_13097_3	ACACACACACACACAC	AC(2*8)	183	16	ATTTCCGCTTCTCTTCACTTTGTCTTCTGCAACCACCATAGCTGCCAATCCCCTACCCCTCTTGGTCCCCCA[ACACACACACACACAC]ATTCTCCTTTGAGGGCCCGCCATAAGCTTTTCCATGGCTGCTTCTCCACAACACGAAGCTC	ATTTCCGCTTCTCTTCACTTTG	59.892	0.409091	GAGCTTCGTGTTGTGGAGAAG	60.043	0.52381	149
isoform_133400_13104_1	AGAGAGAGAGAGAGAGAGAGAGAGAGAGAGAGAGAGAGAGAGAGAGAGAGAGAGAGAG	AG(2*29)	408	58	ACTTCTGTTTTTCCTTTCGTTCCCTTGTATTTGCGCAC[AGAGAGAGAGAGAGAGAGAGAGAGAGAGAGAGAGAGAGAGAGAGAGAGAGAGAGAGAG]GCATCTCGTTGCGATTGTGTCTAGTCAGAAG	ACTTCTGTTTTTCCTTTCGTTCC	60.031	0.391304	CTTCTGACTAGACACAATCGCAA	59.571	0.434783	127
isoform_133400_13104_2	AGAGAGAGAGAGAGAGAGAGAGAGAGAGAGAGAGAGAGAGAGAGAGAGAGAGAGAGAG	AG(2*29)	408	58	ACTTCTGTTTTTCCTTTCGTTCCCTTGTATTTGCGCAC[AGAGAGAGAGAGAGAGAGAGAGAGAGAGAGAGAGAGAGAGAGAGAGAGAGAGAGAGAG]GCATCTCGTTGCGATTGTGTCTAGTCAGAA	ACTTCTGTTTTTCCTTTCGTTCC	60.031	0.391304	TTCTGACTAGACACAATCGCAAC	59.438	0.434783	126
isoform_133400_13104_3	AGAGAGAGAGAGAGAGAGAGAGAGAGAGAGAGAGAGAGAGAGAGAGAGAGAGAGAGAG	AG(2*29)	408	58	TTTCCTTTCGTTCCCTTGTATTTGCGCAC[AGAGAGAGAGAGAGAGAGAGAGAGAGAGAGAGAGAGAGAGAGAGAGAGAGAGAGAGAG]GCATCTCGTTGCGATTGTGTCTAGTCAGAAG	TTTCCTTTCGTTCCCTTGTATTT	60.214	0.347826	CTTCTGACTAGACACAATCGCAA	59.571	0.434783	118
isoform_133400_13104_4	AGAGAGAGAGAGAGAGAGAGAGAGAGAGAGAGAGAGAGAGAGAGAGAGAGAGAGAGAG	AG(2*29)	408	58	TTTTCCTTTCGTTCCCTTGTATTTGCGCAC[AGAGAGAGAGAGAGAGAGAGAGAGAGAGAGAGAGAGAGAGAGAGAGAGAGAGAGAGAG]GCATCTCGTTGCGATTGTGTCTAGTCAGAAG	TTTTCCTTTCGTTCCCTTGTATT	60.214	0.347826	CTTCTGACTAGACACAATCGCAA	59.571	0.434783	119
isoform_133400_13104_5	AGAGAGAGAGAGAGAGAGAGAGAGAGAGAGAGAGAGAGAGAGAGAGAGAGAGAGAGAG	AG(2*29)	408	58	TTTTTCCTTTCGTTCCCTTGTATTTGCGCAC[AGAGAGAGAGAGAGAGAGAGAGAGAGAGAGAGAGAGAGAGAGAGAGAGAGAGAGAGAG]GCATCTCGTTGCGATTGTGTCTAGTCAGAAG	TTTTTCCTTTCGTTCCCTTGTAT	60.214	0.347826	CTTCTGACTAGACACAATCGCAA	59.571	0.434783	120
isoform_133414_13110_1	GAGAGAGAGAGA	GA(2*6)	1258	12	AAAGTTGCTCAGATTTTACAGCGTGTGTGGACAGCAACTGGGTTCTTCTATGAAGGGGGG[GAGAGAGAGAGA]CTGCTTCAAGTCATGTTCAACCCTAACTTTTCCCGTCAACGTTGAATTCAAAGGGAGCAATGGATTCCATTCCAAAAGCTAGTTGAA	AAAGTTGCTCAGATTTTACAGCG	59.965	0.391304	TTCAACTAGCTTTTGGAATGGAA	60.115	0.347826	159
isoform_133414_13110_2	GAGAGAGAGAGA	GA(2*6)	1258	12	AAAGTTGCTCAGATTTTACAGCGTGTGTGGACAGCAACTGGGTTCTTCTATGAAGGGGGG[GAGAGAGAGAGA]CTGCTTCAAGTCATGTTCAACCCTAACTTTTCCCGTCAACGTTGAATTCAAAGGGAGCAATGGATTCCATTCCAAAAGCTAGTTGAAG	AAAGTTGCTCAGATTTTACAGCG	59.965	0.391304	CTTCAACTAGCTTTTGGAATGGA	59.78	0.391304	160
isoform_133414_13110_3	GAGAGAGAGAGA	GA(2*6)	1258	12	ACAGCAACTGGGTTCTTCTATGAAGGGGGG[GAGAGAGAGAGA]CTGCTTCAAGTCATGTTCAACCCTAACTTTTCCCGTCAACGTTGAATTCAAAGGGAGCAATGGATTCCATTCCAAAAGCTAGTTGAA	ACAGCAACTGGGTTCTTCTATGA	60.178	0.434783	TTCAACTAGCTTTTGGAATGGAA	60.115	0.347826	129
isoform_133414_13110_4	GAGAGAGAGAGA	GA(2*6)	1258	12	GACAGCAACTGGGTTCTTCTATGAAGGGGGG[GAGAGAGAGAGA]CTGCTTCAAGTCATGTTCAACCCTAACTTTTCCCGTCAACGTTGAATTCAAAGGGAGCAATGGATTCCATTCCAAAAGCTAGTTGAA	GACAGCAACTGGGTTCTTCTATG	60.178	0.478261	TTCAACTAGCTTTTGGAATGGAA	60.115	0.347826	130
isoform_133414_13110_5	GAGAGAGAGAGA	GA(2*6)	1258	12	ACAGCAACTGGGTTCTTCTATGAAGGGGGG[GAGAGAGAGAGA]CTGCTTCAAGTCATGTTCAACCCTAACTTTTCCCGTCAACGTTGAATTCAAAGGGAGCAATGGATTCCATTCCAAAAGCTAGTTGAAG	ACAGCAACTGGGTTCTTCTATGA	60.178	0.434783	CTTCAACTAGCTTTTGGAATGGA	59.78	0.391304	130
isoform_133414_13111_1	CACACACACACACACACA	CA(2*9)	2221	18	ATACCCACACATTCTTTGTTTGCCTTTCATTTGCAGCCTTCATCTGGCACGCACATGCACAGGCGCGCG[CACACACACACACACACA]CTCACTTTACTCATTCATCCTTTCACTTGGGTTAAA	ATACCCACACATTCTTTGTTTGC	60.163	0.391304	TTTAACCCAAGTGAAAGGATGAA	59.865	0.347826	123
isoform_133414_13111_2	CACACACACACACACACA	CA(2*9)	2221	18	ATACCCACACATTCTTTGTTTGCCTTTCATTTGCAGCCTTCATCTGGCACGCACATGCACAGGCGCGCG[CACACACACACACACACA]CTCACTTTACTCATTCATCCTTTCACTTGGGTTAAAA	ATACCCACACATTCTTTGTTTGC	60.163	0.391304	TTTTAACCCAAGTGAAAGGATGA	59.865	0.347826	124
isoform_133414_13111_3	CACACACACACACACACA	CA(2*9)	2221	18	GTTAATTTCACTCCAACACACCCACACATACACAGATATACCCACACATTCTTTGTTTGCCTTTCATTTGCAGCCTTCATCTGGCACGCACATGCACAGGCGCGCG[CACACACACACACACACA]CTCACTTTACTCATTCATCCTTTCACTTGGGTTAAA	GTTAATTTCACTCCAACACACCC	59.666	0.434783	TTTAACCCAAGTGAAAGGATGAA	59.865	0.347826	160
isoform_133414_13111_4	CACACACACACACACACA	CA(2*9)	2221	18	GTTAATTTCACTCCAACACACCCACACATACACAGATATACCCACACATTCTTTGTTTGCCTTTCATTTGCAGCCTTCATCTGGCACGCACATGCACAGGCGCGCG[CACACACACACACACACA]CTCACTTTACTCATTCATCCTTTCACTTGGGTTA	GTTAATTTCACTCCAACACACCC	59.666	0.434783	TAACCCAAGTGAAAGGATGAATG	60.223	0.391304	158
isoform_133414_13111_5	CACACACACACACACACA	CA(2*9)	2221	18	GGTTAATTTCACTCCAACACACCCACACATACACAGATATACCCACACATTCTTTGTTTGCCTTTCATTTGCAGCCTTCATCTGGCACGCACATGCACAGGCGCGCG[CACACACACACACACACA]CTCACTTTACTCATTCATCCTTTCACTTGGGTTA	GGTTAATTTCACTCCAACACACC	59.666	0.434783	TAACCCAAGTGAAAGGATGAATG	60.223	0.391304	159
isoform_133473_13116_2	GAGAGAGAGAGA	GA(2*6)	1167	12	GTGCAACAGGTAGCAGAGAAGTTAACGCTGGCTGTAGGGGAAGAAGCAG[GAGAGAGAGAGA]TCGTTGGCACAAAACGCTAGTGAGAGGAAA	GTGCAACAGGTAGCAGAGAAGTT	59.999	0.478261	TTTCCTCTCACTAGCGTTTTGTG	60.802	0.434783	91
isoform_133473_13116_3	GAGAGAGAGAGA	GA(2*6)	1167	12	GTGCAACAGGTAGCAGAGAAGTTAACGCTGGCTGTAGGGGAAGAAGCAG[GAGAGAGAGAGA]TCGTTGGCACAAAACGCTAGTGAGAGGAAAC	GTGCAACAGGTAGCAGAGAAGTT	59.999	0.478261	GTTTCCTCTCACTAGCGTTTTGT	59.015	0.434783	92
isoform_133473_13116_4	GAGAGAGAGAGA	GA(2*6)	1167	12	GTGCAACAGGTAGCAGAGAAGTTAACGCTGGCTGTAGGGGAAGAAGCAG[GAGAGAGAGAGA]TCGTTGGCACAAAACGCTAGTGAGAGGAAACGCTAGAG	GTGCAACAGGTAGCAGAGAAGTT	59.999	0.478261	CTCTAGCGTTTCCTCTCACTAGC	59.015	0.521739	99
isoform_133473_13116_5	GAGAGAGAGAGA	GA(2*6)	1167	12	GTGCAACAGGTAGCAGAGAAGTTAACGCTGGCTGTAGGGGAAGAAGCAG[GAGAGAGAGAGA]TCGTTGGCACAAAACGCTAGTGAGAGGAAACGCTAGAGAGA	GTGCAACAGGTAGCAGAGAAGTT	59.999	0.478261	TCTCTCTAGCGTTTCCTCTCACT	58.956	0.478261	102
isoform_133505_13172_1	TCTCTCTCTCTCTCTC	TC(2*8)	283	16	AATGTAAGTTTTGAGGCTCATCGTAAGAAGAGCCAGCAAATTCGTATCTGCAAT[TCTCTCTCTCTCTCTC]CTGCTGCTCCTTGCACATCTCCCTTTTCTCCCTATACCTCA	AATGTAAGTTTTGAGGCTCATCG	59.68	0.391304	TGAGGTATAGGGAGAAAAGGGAG	59.972	0.478261	111
isoform_133505_13172_2	TCTCTCTCTCTCTCTC	TC(2*8)	283	16	TAAGAAGAGCCAGCAAATTCGTATCTGCAAT[TCTCTCTCTCTCTCTC]CTGCTGCTCCTTGCACATCTCCCTTTTCTCCCTATACCTCA	TAAGAAGAGCCAGCAAATTCGTA	60.38	0.391304	TGAGGTATAGGGAGAAAAGGGAG	59.972	0.478261	88
isoform_133505_13172_3	TCTCTCTCTCTCTCTC	TC(2*8)	283	16	TAAGAAGAGCCAGCAAATTCGTATCTGCAAT[TCTCTCTCTCTCTCTC]CTGCTGCTCCTTGCACATCTCCCTTTTCTCCCTATACCTCAACACCTGCTGCTACACATGGATTGCAGATCTCCTCTTTCTACCTGTGCCT	TAAGAAGAGCCAGCAAATTCGTA	60.38	0.391304	AGGCACAGGTAGAAAGAGGAGAT	59.801	0.478261	138
isoform_133505_13172_4	TCTCTCTCTCTCTCTC	TC(2*8)	283	16	AGTTTTGAGGCTCATCGTAAGAAGAGCCAGCAAATTCGTATCTGCAAT[TCTCTCTCTCTCTCTC]CTGCTGCTCCTTGCACATCTCCCTTTTCTCCCTATACCTCA	AGTTTTGAGGCTCATCGTAAGAA	59.445	0.391304	TGAGGTATAGGGAGAAAAGGGAG	59.972	0.478261	105
isoform_133505_13172_5	TCTCTCTCTCTCTCTC	TC(2*8)	283	16	AATGTAAGTTTTGAGGCTCATCGTAAGAAGAGCCAGCAAATTCGTATCTGCAAT[TCTCTCTCTCTCTCTC]CTGCTGCTCCTTGCACATCTCCCTTTTCTCCCTATACCTCAA	AATGTAAGTTTTGAGGCTCATCG	59.68	0.391304	TTGAGGTATAGGGAGAAAAGGGA	60.301	0.434783	112
isoform_133514_13177_1	GTGTGTGTGTGT	GT(2*6)	1022	12	CACACTACTGTCATCAACCTCCACCCCCACACATATTG[GTGTGTGTGTGT]GCCTGACTCCACCTCATACTATCTCCTCCACCTTCCATACCCACATAAAAATCAATCTGGGTCGTGAGCTCTGAAATCCACTAAT	CACACTACTGTCATCAACCTCCA	60.081	0.478261	ATTAGTGGATTTCAGAGCTCACG	59.797	0.434783	135
isoform_133514_13177_2	GTGTGTGTGTGT	GT(2*6)	1022	12	CACACTACTGTCATCAACCTCCACCCCCACACATATTG[GTGTGTGTGTGT]GCCTGACTCCACCTCATACTATCTCCTCCACCTTCCATACCCACATAAAAATCAATCTGGGTCGTGA	CACACTACTGTCATCAACCTCCA	60.081	0.478261	TCACGACCCAGATTGATTTTTAT	59.729	0.347826	117
isoform_133514_13177_3	GTGTGTGTGTGT	GT(2*6)	1022	12	CACACTACTGTCATCAACCTCCACCCCCACACATATTG[GTGTGTGTGTGT]GCCTGACTCCACCTCATACTATCTCCTCCACCTTCCATACCCACATAAAAATCAATCTGGGTCGTGAG	CACACTACTGTCATCAACCTCCA	60.081	0.478261	CTCACGACCCAGATTGATTTTTA	60.35	0.391304	118
isoform_133514_13177_4	GTGTGTGTGTGT	GT(2*6)	1022	12	CACACTACTGTCATCAACCTCCACCCCCACACATATTG[GTGTGTGTGTGT]GCCTGACTCCACCTCATACTATCTCCTCCACCTTCCATACCCACATAAAAATCAATCTGGGTCG	CACACTACTGTCATCAACCTCCA	60.081	0.478261	CGACCCAGATTGATTTTTATGTG	60.582	0.391304	114
isoform_133514_13177_5	GTGTGTGTGTGT	GT(2*6)	1022	12	CACACTACTGTCATCAACCTCCACCCCCACACATATTG[GTGTGTGTGTGT]GCCTGACTCCACCTCATACTATCTCCTCCACCTTCCATACCCACATAAAAATCAATCTGGGTCGTGAGCTCTGAAATCCACTAATAAACTGTCGGCGCAGATA	CACACTACTGTCATCAACCTCCA	60.081	0.478261	TATCTGCGCCGACAGTTTATTAG	60.621	0.434783	153
isoform_133554_13180_1	TCTCTCTCTCTCTCTCTCTCTCTCTCTC	TC(2*14)	188	28	AAAACCACTTATAGTGTCCGGGTAAAAGGTCCTGGTGGGGAGGTCCTGAAACCT[TCTCTCTCTCTCTCTCTCTCTCTCTCTC]TGTGCGTCTGTGTCAGGCTCCCCTGCTGAAATTCTCTTGCTCTTTTTGC	AAAACCACTTATAGTGTCCGGGT	60.05	0.434783	GCAAAAAGAGCAAGAGAATTTCA	60.017	0.347826	131
isoform_133554_13180_2	TCTCTCTCTCTCTCTCTCTCTCTCTCTC	TC(2*14)	188	28	AAAACCACTTATAGTGTCCGGGTAAAAGGTCCTGGTGGGGAGGTCCTGAAACCT[TCTCTCTCTCTCTCTCTCTCTCTCTCTC]TGTGCGTCTGTGTCAGGCTCCCCTGCTGAAATTCTCTTGCTCTTTT	AAAACCACTTATAGTGTCCGGGT	60.05	0.434783	AAAAGAGCAAGAGAATTTCAGCA	59.68	0.347826	128
isoform_133554_13180_3	TCTCTCTCTCTCTCTCTCTCTCTCTCTC	TC(2*14)	188	28	TATAGTGTCCGGGTAAAAGGTCCTGGTGGGGAGGTCCTGAAACCT[TCTCTCTCTCTCTCTCTCTCTCTCTCTC]TGTGCGTCTGTGTCAGGCTCCCCTGCTGAAATTCTCTTGCTCTTTTTGC	TATAGTGTCCGGGTAAAAGGTCC	60.459	0.478261	GCAAAAAGAGCAAGAGAATTTCA	60.017	0.347826	122
isoform_133554_13180_4	TCTCTCTCTCTCTCTCTCTCTCTCTCTC	TC(2*14)	188	28	AAAAACCACTTATAGTGTCCGGGTAAAAGGTCCTGGTGGGGAGGTCCTGAAACCT[TCTCTCTCTCTCTCTCTCTCTCTCTCTC]TGTGCGTCTGTGTCAGGCTCCCCTGCTGAAATTCTCTTGCTCTTTTTGC	AAAAACCACTTATAGTGTCCGGG	60.488	0.434783	GCAAAAAGAGCAAGAGAATTTCA	60.017	0.347826	132
isoform_133554_13180_5	TCTCTCTCTCTCTCTCTCTCTCTCTCTC	TC(2*14)	188	28	CCACTTATAGTGTCCGGGTAAAAGGTCCTGGTGGGGAGGTCCTGAAACCT[TCTCTCTCTCTCTCTCTCTCTCTCTCTC]TGTGCGTCTGTGTCAGGCTCCCCTGCTGAAATTCTCTTGCTCTTTTTGC	CCACTTATAGTGTCCGGGTAAAA	59.337	0.434783	GCAAAAAGAGCAAGAGAATTTCA	60.017	0.347826	127
isoform_133562_13182_1	AGAGAGAGAGAGAG	AG(2*7)	1441	14	TGTGTATTTTTCATCCTTCTCGGTTACTATCACAAACAAGAGTGCATAACAACATCACATAAACTCAGATAAATAGACGTTCTTTTCTTATATAAAGTCAAAATGAAATAGTGATAA[AGAGAGAGAGAGAG]ATTGACACCAGATTGGGAACCAAAAGAT	TGTGTATTTTTCATCCTTCTCGG	60.35	0.391304	ATCTTTTGGTTCCCAATCTGGT	60.928	0.409091	159
isoform_133562_13182_2	AGAGAGAGAGAGAG	AG(2*7)	1441	14	TGTATTTTTCATCCTTCTCGGTTACTATCACAAACAAGAGTGCATAACAACATCACATAAACTCAGATAAATAGACGTTCTTTTCTTATATAAAGTCAAAATGAAATAGTGATAA[AGAGAGAGAGAGAG]ATTGACACCAGATTGGGAACCAAAAGAT	TGTATTTTTCATCCTTCTCGGTT	59.048	0.347826	ATCTTTTGGTTCCCAATCTGGT	60.928	0.409091	157
isoform_133562_13182_3	AGAGAGAGAGAGAG	AG(2*7)	1441	14	TGTGTATTTTTCATCCTTCTCGGTTACTATCACAAACAAGAGTGCATAACAACATCACATAAACTCAGATAAATAGACGTTCTTTTCTTATATAAAGTCAAAATGAAATAGTGATAA[AGAGAGAGAGAGAG]ATTGACACCAGATTGGGAACCAAAAGATG	TGTGTATTTTTCATCCTTCTCGG	60.35	0.391304	CATCTTTTGGTTCCCAATCTG	59.415	0.428571	160
isoform_133562_13182_4	AGAGAGAGAGAGAG	AG(2*7)	1441	14	TCATCCTTCTCGGTTACTATCACAAACAAGAGTGCATAACAACATCACATAAACTCAGATAAATAGACGTTCTTTTCTTATATAAAGTCAAAATGAAATAGTGATAA[AGAGAGAGAGAGAG]ATTGACACCAGATTGGGAACCAAAAGAT	TCATCCTTCTCGGTTACTATCACA	60.021	0.416667	ATCTTTTGGTTCCCAATCTGGT	60.928	0.409091	149
isoform_133562_13182_5	AGAGAGAGAGAGAG	AG(2*7)	1441	14	TGTGTATTTTTCATCCTTCTCGGTTACTATCACAAACAAGAGTGCATAACAACATCACATAAACTCAGATAAATAGACGTTCTTTTCTTATATAAAGTCAAAATGAAATAGTGATAA[AGAGAGAGAGAGAG]ATTGACACCAGATTGGGAACCAAAAGA	TGTGTATTTTTCATCCTTCTCGG	60.35	0.391304	TCTTTTGGTTCCCAATCTGGT	60.708	0.428571	158
isoform_133565_13183_1	CTCTCTCTCTCTCTCTCT	CT(2*9)	277	18	TTGCAGAGAAGCTGCAGAGAGGGGGACGGGCTAAAGGCCTGAGGATGGACGGGGCAGGGAGCGAGCCGGAAAACATCGCTGCCTTGCACTCCCTCTCTCC[CTCTCTCTCTCTCTCTCT]CCCGTCGACAGGCTCCCCCCCTTTCCCTGTGTTGAAGAAGAG	TTGCAGAGAAGCTGCAGAGAG	61.14	0.52381	CTCTTCTTCAACACAGGGAAAGG	61.485	0.478261	160
isoform_133565_13183_2	CTCTCTCTCTCTCTCTCT	CT(2*9)	277	18	TTGCAGAGAAGCTGCAGAGAGGGGGACGGGCTAAAGGCCTGAGGATGGACGGGGCAGGGAGCGAGCCGGAAAACATCGCTGCCTTGCACTCCCTCTCTCC[CTCTCTCTCTCTCTCTCT]CCCGTCGACAGGCTCCCCCCCTTTCCCTGTGTTGAAGAAGAG	TTGCAGAGAAGCTGCAGAGA	60.16	0.5	CTCTTCTTCAACACAGGGAAAGG	61.485	0.478261	160
isoform_133565_13183_3	CTCTCTCTCTCTCTCTCT	CT(2*9)	277	18	TGCAGAGAAGCTGCAGAGAGGGGGACGGGCTAAAGGCCTGAGGATGGACGGGGCAGGGAGCGAGCCGGAAAACATCGCTGCCTTGCACTCCCTCTCTCC[CTCTCTCTCTCTCTCTCT]CCCGTCGACAGGCTCCCCCCCTTTCCCTGTGTTGAAGAAGAG	TGCAGAGAAGCTGCAGAGAG	59.751	0.55	CTCTTCTTCAACACAGGGAAAGG	61.485	0.478261	159
isoform_133565_13183_4	CTCTCTCTCTCTCTCTCT	CT(2*9)	277	18	TGCAGAGAAGCTGCAGAGAGGGGGACGGGCTAAAGGCCTGAGGATGGACGGGGCAGGGAGCGAGCCGGAAAACATCGCTGCCTTGCACTCCCTCTCTCC[CTCTCTCTCTCTCTCTCT]CCCGTCGACAGGCTCCCCCCCTTTCCCTGTGTTGAAGAAGAGG	TGCAGAGAAGCTGCAGAGAG	59.751	0.55	CCTCTTCTTCAACACAGGGAAAG	61.485	0.478261	160
isoform_133565_13183_5	CTCTCTCTCTCTCTCTCT	CT(2*9)	277	18	TTGCAGAGAAGCTGCAGAGAGGGGGACGGGCTAAAGGCCTGAGGATGGACGGGGCAGGGAGCGAGCCGGAAAACATCGCTGCCTTGCACTCCCTCTCTCC[CTCTCTCTCTCTCTCTCT]CCCGTCGACAGGCTCCCCCCCTTTCCCTGTGTTGAAGAAGA	TTGCAGAGAAGCTGCAGAGAG	61.14	0.52381	TCTTCTTCAACACAGGGAAAGG	60.632	0.454545	159
isoform_133571_13184_1	AGAGAGAGAGAGAGAGAGAGAGAGAGAGAGAGAGAGAGAGAGAGAGAGAGAGAGAGAGAGAG	AG(2*31)	1116	62	CAGGCTATTTCTAGCATTTCTAAGGTTCTCTTGTACTCAGATTTATAGAGATGATCTTTCCACCAA[AGAGAGAGAGAGAGAGAGAGAGAGAGAGAGAGAGAGAGAGAGAGAGAGAGAGAGAGAGAGAG]AACCTTTTTGGACTGCCTCTTTTTG	CAGGCTATTTCTAGCATTTCTAAGG	59.109	0.4	CAAAAAGAGGCAGTCCAAAAAG	60.262	0.409091	153
isoform_133571_13184_2	AGAGAGAGAGAGAGAGAGAGAGAGAGAGAGAGAGAGAGAGAGAGAGAGAGAGAGAGAGAGAG	AG(2*31)	1116	62	ATAGAGATGATCTTTCCACCAA[AGAGAGAGAGAGAGAGAGAGAGAGAGAGAGAGAGAGAGAGAGAGAGAGAGAGAGAGAGAGAG]AACCTTTTTGGACTGCCTCTTTTTG	ATAGAGATGATCTTTCCACCAAA	56.888	0.347826	CAAAAAGAGGCAGTCCAAAAAG	60.262	0.409091	109
isoform_133571_13184_3	AGAGAGAGAGAGAGAGAGAGAGAGAGAGAGAGAGAGAGAGAGAGAGAGAGAGAGAGAGAGAG	AG(2*31)	1116	62	CAGGCTATTTCTAGCATTTCTAAGGTTCTCTTGTACTCAGATTTATAGAGATGATCTTTCCACCAA[AGAGAGAGAGAGAGAGAGAGAGAGAGAGAGAGAGAGAGAGAGAGAGAGAGAGAGAGAGAGAG]AACCTTTTTGGACTGCCTCTTTT	CAGGCTATTTCTAGCATTTCTAAGG	59.109	0.4	AAAAGAGGCAGTCCAAAAAGGT	60.495	0.409091	151
isoform_133571_13184_4	AGAGAGAGAGAGAGAGAGAGAGAGAGAGAGAGAGAGAGAGAGAGAGAGAGAGAGAGAGAGAG	AG(2*31)	1116	62	CAGGCTATTTCTAGCATTTCTAAGGTTCTCTTGTACTCAGATTTATAGAGATGATCTTTCCACCAA[AGAGAGAGAGAGAGAGAGAGAGAGAGAGAGAGAGAGAGAGAGAGAGAGAGAGAGAGAGAGAG]AACCTTTTTGGACTGCCTCTTTTTG	CAGGCTATTTCTAGCATTTCTAAGGT	59.776	0.384615	CAAAAAGAGGCAGTCCAAAAAG	60.262	0.409091	153
isoform_133571_13184_5	AGAGAGAGAGAGAGAGAGAGAGAGAGAGAGAGAGAGAGAGAGAGAGAGAGAGAGAGAGAGAG	AG(2*31)	1116	62	ACAGGCTATTTCTAGCATTTCTAAGGTTCTCTTGTACTCAGATTTATAGAGATGATCTTTCCACCAA[AGAGAGAGAGAGAGAGAGAGAGAGAGAGAGAGAGAGAGAGAGAGAGAGAGAGAGAGAGAGAG]AACCTTTTTGGACTGCCTCTTTTTG	ACAGGCTATTTCTAGCATTTCTAAGG	59.776	0.384615	CAAAAAGAGGCAGTCCAAAAAG	60.262	0.409091	154
isoform_133585_13193_1	TCTCTCTCTCTCTCTC	TC(2*8)	881	16	GTATGTCCCTCTGAAGACCGTGCTCCCTCTTTG[TCTCTCTCTCTCTCTC]CCCCCTCTATCTCTGCGCGTTCGCGACAGGAGAGGCTTGGAAGTCCTATGTCTTGACTCG	GTATGTCCCTCTGAAGACCGTG	60.932	0.545455	CGAGTCAAGACATAGGACTTCCA	60.666	0.478261	109
isoform_133585_13193_2	TCTCTCTCTCTCTCTC	TC(2*8)	881	16	GTATGTCCCTCTGAAGACCGTGCTCCCTCTTTG[TCTCTCTCTCTCTCTC]CCCCCTCTATCTCTGCGCGTTCGCGACAGGAGAGGCTTGGAAGTCCTATGTCTTGAC	GTATGTCCCTCTGAAGACCGTG	60.932	0.545455	GTCAAGACATAGGACTTCCAAGC	59.295	0.478261	106
isoform_133590_13196_1	ATGATGATGATGATGATG	ATG(3*6)	1447	18	GATAGCTTGCAAGGTGTTACCAGCAAGGGGAATTGTGGAGAGGGTCGCCCAACAAACTGTTTATTGCAAGAGCTCATGCGATGCAGCAGCTTGCAGA[ATGATGATGATGATGATG]TTAGTGAAGCTGGGAGTTTGCTGATGGACTCCAAT	GATAGCTTGCAAGGTGTTACCAG	60.195	0.478261	ATTGGAGTCCATCAGCAAACTC	60.505	0.454545	150
isoform_133590_13196_2	ATGATGATGATGATGATG	ATG(3*6)	1447	18	GATAGCTTGCAAGGTGTTACCAGCAAGGGGAATTGTGGAGAGGGTCGCCCAACAAACTGTTTATTGCAAGAGCTCATGCGATGCAGCAGCTTGCAGA[ATGATGATGATGATGATG]TTAGTGAAGCTGGGAGTTTGCTGATGGACTCCAATC	GATAGCTTGCAAGGTGTTACCAG	60.195	0.478261	GATTGGAGTCCATCAGCAAACT	60.505	0.454545	151
isoform_133590_13196_3	ATGATGATGATGATGATG	ATG(3*6)	1447	18	GATAGCTTGCAAGGTGTTACCAGCAAGGGGAATTGTGGAGAGGGTCGCCCAACAAACTGTTTATTGCAAGAGCTCATGCGATGCAGCAGCTTGCAGA[ATGATGATGATGATGATG]TTAGTGAAGCTGGGAGTTTGCTGATGGACTCCAATC	GATAGCTTGCAAGGTGTTACCAG	60.195	0.478261	GATTGGAGTCCATCAGCAAACTC	62.243	0.478261	151
isoform_133590_13196_4	ATGATGATGATGATGATG	ATG(3*6)	1447	18	GATAGCTTGCAAGGTGTTACCAGCAAGGGGAATTGTGGAGAGGGTCGCCCAACAAACTGTTTATTGCAAGAGCTCATGCGATGCAGCAGCTTGCAGA[ATGATGATGATGATGATG]TTAGTGAAGCTGGGAGTTTGCTGATGGACTCCAA	GATAGCTTGCAAGGTGTTACCAG	60.195	0.478261	TTGGAGTCCATCAGCAAACTC	60.248	0.47619	149
isoform_133590_13196_5	ATGATGATGATGATGATG	ATG(3*6)	1447	18	GATAGCTTGCAAGGTGTTACCAGCAAGGGGAATTGTGGAGAGGGTCGCCCAACAAACTGTTTATTGCAAGAGCTCATGCGATGCAGCAGCTTGCAGA[ATGATGATGATGATGATG]TTAGTGAAGCTGGGAGTTTGCTGATGGACTCCAATC	GATAGCTTGCAAGGTGTTACCAG	60.195	0.478261	GATTGGAGTCCATCAGCAAAC	59.546	0.47619	151
isoform_133676_13200_1	TCTCTCTCTCTCTCTC	TC(2*8)	1761	16	AAACGACTTCTTGATTTTGGACAACAATTTGTCTGCCCCTTGTTCCTTTTTGCCATTACTCTCTCTCTCATCT[TCTCTCTCTCTCTCTC]CCATTTACCCTTGTCTCTTTGTTATGCTATGCAATCTCGAAAAGAGTGTGAAAAGACCTCCC	AAACGACTTCTTGATTTTGGACA	60.028	0.347826	GGGAGGTCTTTTCACACTCTTTT	60.029	0.434783	151
isoform_133676_13200_2	TCTCTCTCTCTCTCTC	TC(2*8)	1761	16	AAACGACTTCTTGATTTTGGACAACAATTTGTCTGCCCCTTGTTCCTTTTTGCCATTACTCTCTCTCTCATCT[TCTCTCTCTCTCTCTC]CCATTTACCCTTGTCTCTTTGTTATGCTATGCAATCTCGAAAAGAG	AAACGACTTCTTGATTTTGGACA	60.028	0.347826	CTCTTTTCGAGATTGCATAGCAT	59.897	0.391304	135
isoform_133676_13200_3	TCTCTCTCTCTCTCTC	TC(2*8)	1761	16	CAGAAACGACTTCTTGATTTTGGACAACAATTTGTCTGCCCCTTGTTCCTTTTTGCCATTACTCTCTCTCTCATCT[TCTCTCTCTCTCTCTC]CCATTTACCCTTGTCTCTTTGTTATGCTATGCAATCTCGAAAAGAGTGTGAAAAGACCTCCC	CAGAAACGACTTCTTGATTTTGG	60.149	0.391304	GGGAGGTCTTTTCACACTCTTTT	60.029	0.434783	154
isoform_133676_13200_4	TCTCTCTCTCTCTCTC	TC(2*8)	1761	16	CAGAAACGACTTCTTGATTTTGGACAACAATTTGTCTGCCCCTTGTTCCTTTTTGCCATTACTCTCTCTCTCATCT[TCTCTCTCTCTCTCTC]CCATTTACCCTTGTCTCTTTGTTATGCTATGCAATCTCGAAAAGAG	CAGAAACGACTTCTTGATTTTGG	60.149	0.391304	CTCTTTTCGAGATTGCATAGCAT	59.897	0.391304	138
isoform_133676_13200_5	TCTCTCTCTCTCTCTC	TC(2*8)	1761	16	AAACGACTTCTTGATTTTGGACAACAATTTGTCTGCCCCTTGTTCCTTTTTGCCATTACTCTCTCTCTCATCT[TCTCTCTCTCTCTCTC]CCATTTACCCTTGTCTCTTTGTTATGCTATGCAATCTCGA	AAACGACTTCTTGATTTTGGACA	60.028	0.347826	TCGAGATTGCATAGCATAACAAA	59.767	0.347826	129
isoform_13374_2634_1	TGTGTGTGTGTG	TG(2*6)	1025	12	CTCTCTGGCTCTCTCACTCTTTGGCCTAGAAGTAGCATGGTCGACTCTCGCTCA[TGTGTGTGTGTG]GATATCATGTCACTTAGAATGGGGC	CTCTCTGGCTCTCTCACTCTTTG	59.946	0.521739	GCCCCATTCTAAGTGACATGATA	60.218	0.434783	91
isoform_13374_2634_2	TGTGTGTGTGTG	TG(2*6)	1025	12	CTCTCTGGCTCTCTCACTCTTTGGCCTAGAAGTAGCATGGTCGACTCTCGCTCA[TGTGTGTGTGTG]GATATCATGTCACTTAGAATGGGGCAAAACAAAAACCAAGGGAAGTAGAAGGAGAGGATGCTGAGCAGACATCTTGTATGTGTGG	CTCTCTGGCTCTCTCACTCTTTG	59.946	0.521739	CCACACATACAAGATGTCTGCTC	59.676	0.478261	151
isoform_13374_2634_3	TGTGTGTGTGTG	TG(2*6)	1025	12	CTCTCTGGCTCTCTCACTCTTTGGCCTAGAAGTAGCATGGTCGACTCTCGCTCA[TGTGTGTGTGTG]GATATCATGTCACTTAGAATGGGGCAAAACAAAAACCAAGGGAAGTAGAAGGAGA	CTCTCTGGCTCTCTCACTCTTTG	59.946	0.521739	TCTCCTTCTACTTCCCTTGGTTT	59.659	0.434783	121
isoform_13374_2634_4	TGTGTGTGTGTG	TG(2*6)	1025	12	CACTCTTTGGCCTAGAAGTAGCATGGTCGACTCTCGCTCA[TGTGTGTGTGTG]GATATCATGTCACTTAGAATGGGGCAAAACAAAAACCAAGGGAAGTAGAAGGAGAGGATGCTGAGCAGACATCTTGTATGTGTGG	CACTCTTTGGCCTAGAAGTAGCA	60.082	0.478261	CCACACATACAAGATGTCTGCTC	59.676	0.478261	137
isoform_13374_2634_5	TGTGTGTGTGTG	TG(2*6)	1025	12	CTCTCTGGCTCTCTCACTCTTTGGCCTAGAAGTAGCATGGTCGACTCTCGCTCA[TGTGTGTGTGTG]GATATCATGTCACTTAGAATGGGGCAAAACAAAAACCAAGGGAAGTAGAAGG	CTCTCTGGCTCTCTCACTCTTTG	59.946	0.521739	CCTTCTACTTCCCTTGGTTTTTG	60.361	0.434783	118
isoform_133785_13218_1	TCTCTCTCTCTCTCTCTCTCTC	TC(2*11)	1010	22	TTAAATGCCATAACCAACACACACTCTCTAGTAA[TCTCTCTCTCTCTCTCTCTCTC]ACTATCAAAAAGAAAAAGGAGTTGATTTCTATCACTTGGTAATGTCTTCAAAGTCCCAAA	TTAAATGCCATAACCAACACACA	60.157	0.347826	TTTGGGACTTTGAAGACATTACC	59.403	0.391304	116
isoform_133785_13218_2	TCTCTCTCTCTCTCTCTCTCTC	TC(2*11)	1010	22	TTAAATGCCATAACCAACACACACTCTCTAGTAA[TCTCTCTCTCTCTCTCTCTCTC]ACTATCAAAAAGAAAAAGGAGTTGATTTCTATCACTTGGTAATGTCTTCAAAGTCCCA	TTAAATGCCATAACCAACACACA	60.157	0.347826	TGGGACTTTGAAGACATTACCAA	60.736	0.391304	114
isoform_133785_13218_3	TCTCTCTCTCTCTCTCTCTCTC	TC(2*11)	1010	22	TTAAATGCCATAACCAACACACACTCTCTAGTAA[TCTCTCTCTCTCTCTCTCTCTC]ACTATCAAAAAGAAAAAGGAGTTGATTTCTATCACTTGGTAATGTCTTCAAAGTCCCAA	TTAAATGCCATAACCAACACACA	60.157	0.347826	TTGGGACTTTGAAGACATTACCA	60.736	0.391304	115
isoform_133785_13219_2	GTGTGTGTGTGTGTGT	GT(2*8)	2545	16	AGACTCTAAACTGGGGCTCGTAGAAAGCTGGTAGAGAGTTGCTGTTCGACCAGCCTCAATGCATGCGTGTGC[GTGTGTGTGTGTGTGT]GACTTGCATATACACGGGCTGAAGCAACCTTCATGATGGTTTGCCTCTTGTTATG	AGACTCTAAACTGGGGCTCGTAG	60.311	0.521739	CATAACAAGAGGCAAACCATCAT	60.25	0.391304	143
isoform_133785_13219_3	GTGTGTGTGTGTGTGT	GT(2*8)	2545	16	CTAGACTCTAAACTGGGGCTCGTAGAAAGCTGGTAGAGAGTTGCTGTTCGACCAGCCTCAATGCATGCGTGTGC[GTGTGTGTGTGTGTGT]GACTTGCATATACACGGGCTGAAGCAACCTTCATGATGGTTTGCCTCTTGTTATG	CTAGACTCTAAACTGGGGCTCGT	60.311	0.521739	CATAACAAGAGGCAAACCATCAT	60.25	0.391304	145
isoform_133785_13219_4	GTGTGTGTGTGTGTGT	GT(2*8)	2545	16	AGACTCTAAACTGGGGCTCGTAGAAAGCTGGTAGAGAGTTGCTGTTCGACCAGCCTCAATGCATGCGTGTGC[GTGTGTGTGTGTGTGT]GACTTGCATATACACGGGCTGAAGCAACCTTCATGATGGTTTGCCTCTTGTTATGTGCTTGCTGCTA	AGACTCTAAACTGGGGCTCGTAG	60.311	0.521739	TAGCAGCAAGCACATAACAAGAG	59.741	0.434783	155
isoform_133785_13219_5	GTGTGTGTGTGTGTGT	GT(2*8)	2545	16	CTAGACTCTAAACTGGGGCTCGTAGAAAGCTGGTAGAGAGTTGCTGTTCGACCAGCCTCAATGCATGCGTGTGC[GTGTGTGTGTGTGTGT]GACTTGCATATACACGGGCTGAAGCAACCTTCATGATGGTTTGCCTCTTGTTATGTGCTTGCTGCTA	CTAGACTCTAAACTGGGGCTCGT	60.311	0.521739	TAGCAGCAAGCACATAACAAGAG	59.741	0.434783	157
isoform_133812_13224_1	TCTCTCTCTCTC	TC(2*6)	580	12	ATTTTTCAGCGTGAGCTCTCT[TCTCTCTCTCTC]TGCGCTGCCTCTCTGCAGCTCCAGCGTCTGCTTCATCTTCTCGCTTCGCGCACCCTCTCGCGCTCTCTACAACTGGTATCAGAGCCATTTAGGGTTTCA	ATTTTTCAGCGTGAGCTCTCTT	59.68	0.409091	TGAAACCCTAAATGGCTCTGATA	59.977	0.391304	132
isoform_133812_13224_2	TCTCTCTCTCTC	TC(2*6)	580	12	ATTTTTCAGCGTGAGCTCTCT[TCTCTCTCTCTC]TGCGCTGCCTCTCTGCAGCTCCAGCGTCTGCTTCATCTTCTCGCTTCGCGCACCCTCTCGCGCTCTCTACAACTGGTATCAGAGCCATTTAGGGTTT	ATTTTTCAGCGTGAGCTCTCTT	59.68	0.409091	AAACCCTAAATGGCTCTGATACC	59.765	0.434783	130
isoform_133812_13224_3	TCTCTCTCTCTC	TC(2*6)	580	12	AATAAAACTGAAAGCCCCAAATGAAATGAGCGTGGGTTTTCCCATTTTTCAGCGTGAGCTCTCT[TCTCTCTCTCTC]TGCGCTGCCTCTCTGCAGCTCCAGCGTCTGCTTCATCTTCTCGCTTCGCGCACCCTCTCGCGCTCTCTACAACTGGTATCAGA	AATAAAACTGAAAGCCCCAAATG	60.547	0.347826	TCTGATACCAGTTGTAGAGAGCG	58.688	0.478261	159
isoform_133812_13224_4	TCTCTCTCTCTC	TC(2*6)	580	12	ATTTTTCAGCGTGAGCTCTCT[TCTCTCTCTCTC]TGCGCTGCCTCTCTGCAGCTCCAGCGTCTGCTTCATCTTCTCGCTTCGCGCACCCTCTCGCGCTCTCTACAACTGGTATCAGAGCCATTTAGGGTTTCAC	ATTTTTCAGCGTGAGCTCTCTT	59.68	0.409091	GTGAAACCCTAAATGGCTCTGAT	60.707	0.434783	133
isoform_133812_13224_5	TCTCTCTCTCTC	TC(2*6)	580	12	AATAAAACTGAAAGCCCCAAATGAAATGAGCGTGGGTTTTCCCATTTTTCAGCGTGAGCTCTCT[TCTCTCTCTCTC]TGCGCTGCCTCTCTGCAGCTCCAGCGTCTGCTTCATCTTCTCGCTTC	AATAAAACTGAAAGCCCCAAATG	60.547	0.347826	GAAGCGAGAAGATGAAGCAGAC	60.659	0.5	123
isoform_133885_13235_1	CCTGCGCCTGCGCCTGCGCCTGCG	CCTGCG(6*4)	633	24	TGCCTGTACATACACTCCAAGTTGTGGCCCGGGAAGGCA[CCTGCGCCTGCGCCTGCGCCTGCG]CCCAATCCGTATAGCTCCTCCCG	TGCCTGTACATACACTCCAAGTT	58.712	0.434783	CGGGAGGAGCTATACGGATT	60.431	0.55	86
isoform_133885_13235_2	CCTGCGCCTGCGCCTGCGCCTGCG	CCTGCG(6*4)	633	24	GTACATACACTCCAAGTTGTGGCCCGGGAAGGCA[CCTGCGCCTGCGCCTGCGCCTGCG]CCCAATCCGTATAGCTCCTCCCG	GTACATACACTCCAAGTTGTGGC	58.575	0.478261	CGGGAGGAGCTATACGGATT	60.431	0.55	81
isoform_133885_13235_3	CCTGCGCCTGCGCCTGCGCCTGCG	CCTGCG(6*4)	633	24	GCCTGTACATACACTCCAAGTTGTGGCCCGGGAAGGCA[CCTGCGCCTGCGCCTGCGCCTGCG]CCCAATCCGTATAGCTCCTCCCG	GCCTGTACATACACTCCAAGTTGT	59.52	0.458333	CGGGAGGAGCTATACGGATT	60.431	0.55	85
isoform_133885_13235_4	CCTGCGCCTGCGCCTGCGCCTGCG	CCTGCG(6*4)	633	24	GTGCCTGTACATACACTCCAAGTTGTGGCCCGGGAAGGCA[CCTGCGCCTGCGCCTGCGCCTGCG]CCCAATCCGTATAGCTCCTCCCG	GTGCCTGTACATACACTCCAAGTT	59.52	0.458333	CGGGAGGAGCTATACGGATT	60.431	0.55	87
isoform_133885_13235_5	CCTGCGCCTGCGCCTGCGCCTGCG	CCTGCG(6*4)	633	24	GTGCCTGTACATACACTCCAAGTTGTGGCCCGGGAAGGCA[CCTGCGCCTGCGCCTGCGCCTGCG]CCCAATCCGTATAGCTCCTCCCG	GTGCCTGTACATACACTCCAAGT	58.2	0.478261	CGGGAGGAGCTATACGGATT	60.431	0.55	87
isoform_133943_13242_1	GTGTGTGTGTGT	GT(2*6)	304	12	GAGCTTCATATGATTGTATGCTCGTGCGTGCGTGTGTATGGG[GTGTGTGTGTGT]GGGAGCATATATTCATACTTAGTTCTACACCCATTATTGAGGGCTCATGATGTTAGTGGATATGTTGTGGTATGTGGTCAATACTACGCATGATGGAGCTGAT	GAGCTTCATATGATTGTATGCTCG	60.141	0.416667	ATCAGCTCCATCATGCGTAGTAT	60.027	0.434783	157
isoform_133943_13242_2	GTGTGTGTGTGT	GT(2*6)	304	12	GAGCTTCATATGATTGTATGCTCGTGCGTGCGTGTGTATGGG[GTGTGTGTGTGT]GGGAGCATATATTCATACTTAGTTCTACACCCATTATTGAGGGCTCATGATGTTAGTGGATA	GAGCTTCATATGATTGTATGCTCG	60.141	0.416667	TATCCACTAACATCATGAGCCCT	59.87	0.434783	116
isoform_133943_13242_3	GTGTGTGTGTGT	GT(2*6)	304	12	AGCTTCATATGATTGTATGCTCGTGCGTGCGTGTGTATGGG[GTGTGTGTGTGT]GGGAGCATATATTCATACTTAGTTCTACACCCATTATTGAGGGCTCATGATGTTAGTGGATATGTTGTGGTATGTGGTCAATACTACGCATGATGGAGCTGAT	AGCTTCATATGATTGTATGCTCG	58.447	0.391304	ATCAGCTCCATCATGCGTAGTAT	60.027	0.434783	156
isoform_133943_13242_4	GTGTGTGTGTGT	GT(2*6)	304	12	AGCTTCATATGATTGTATGCTCGTGCGTGCGTGTGTATGGG[GTGTGTGTGTGT]GGGAGCATATATTCATACTTAGTTCTACACCCATTATTGAGGGCTCATGATGTTAGTGGATA	AGCTTCATATGATTGTATGCTCG	58.447	0.391304	TATCCACTAACATCATGAGCCCT	59.87	0.434783	115
isoform_133943_13242_5	GTGTGTGTGTGT	GT(2*6)	304	12	GCTTCATATGATTGTATGCTCGTGCGTGCGTGTGTATGGG[GTGTGTGTGTGT]GGGAGCATATATTCATACTTAGTTCTACACCCATTATTGAGGGCTCATGATGTTAGTGGATATGTTGTGGTATGTGGTCAATACTACGCATGATGGAGCTGAT	GCTTCATATGATTGTATGCTCGT	58.312	0.391304	ATCAGCTCCATCATGCGTAGTAT	60.027	0.434783	155
isoform_133943_13243_1	GTGTGTGTGTGTGTGT	GT(2*8)	1880	16	TTCCTTTTTGGTTAATGTTTCGTGGCAGGCTTTGAGAACTGTTAAACATGCATGCAAGCATTTGCAAGATGCATGCACTCACATGCAC[GTGTGTGTGTGTGTGT]TGCTTAACAAATTAGTCATTGTTTGGTTTTTGATAGGAGCCTTTTA	TTCCTTTTTGGTTAATGTTTCGT	58.995	0.304348	TAAAAGGCTCCTATCAAAAACCA	59.2	0.347826	150
isoform_133943_13243_2	GTGTGTGTGTGTGTGT	GT(2*8)	1880	16	TTTCCTTTTTGGTTAATGTTTCGTGGCAGGCTTTGAGAACTGTTAAACATGCATGCAAGCATTTGCAAGATGCATGCACTCACATGCAC[GTGTGTGTGTGTGTGT]TGCTTAACAAATTAGTCATTGTTTGGTTTTTGATAGGAGCCTTTTA	TTTCCTTTTTGGTTAATGTTTCGT	60.137	0.291667	TAAAAGGCTCCTATCAAAAACCA	59.2	0.347826	151
isoform_133943_13243_3	GTGTGTGTGTGTGTGT	GT(2*8)	1880	16	TCCTTTTTGGTTAATGTTTCGTGGCAGGCTTTGAGAACTGTTAAACATGCATGCAAGCATTTGCAAGATGCATGCACTCACATGCAC[GTGTGTGTGTGTGTGT]TGCTTAACAAATTAGTCATTGTTTGGTTTTTGATAGGAGCCTTTTAA	TCCTTTTTGGTTAATGTTTCGTG	60.25	0.347826	TTAAAAGGCTCCTATCAAAAACC	57.997	0.347826	150
isoform_133943_13243_4	GTGTGTGTGTGTGTGT	GT(2*8)	1880	16	TTCCTTTTTGGTTAATGTTTCGTGGCAGGCTTTGAGAACTGTTAAACATGCATGCAAGCATTTGCAAGATGCATGCACTCACATGCAC[GTGTGTGTGTGTGTGT]TGCTTAACAAATTAGTCATTGTTTGGTTTTTGATAGGAGCCTTTTAA	TTCCTTTTTGGTTAATGTTTCGT	58.995	0.304348	TTAAAAGGCTCCTATCAAAAACCA	60.33	0.333333	151
isoform_133943_13243_5	GTGTGTGTGTGTGTGT	GT(2*8)	1880	16	TTTCCTTTTTGGTTAATGTTTCGTGGCAGGCTTTGAGAACTGTTAAACATGCATGCAAGCATTTGCAAGATGCATGCACTCACATGCAC[GTGTGTGTGTGTGTGT]TGCTTAACAAATTAGTCATTGTTTGGTTTTTGATAGGAGCCTTTTAA	TTTCCTTTTTGGTTAATGTTTCGT	60.137	0.291667	TTAAAAGGCTCCTATCAAAAACCA	60.33	0.333333	152
isoform_133957_13247_1	GCCGCCGCCGCCGCCGCC	GCC(3*6)	491	18	CTCTAATTGCTGGTGGCACTGCCTCTGCCATGAAAGCTGCTGGAGGTGGGGCCACCGCCA[GCCGCCGCCGCCGCCGCC]ACCCACCCACCCTCCTTGTTAGTGCAAGCACGGCTTATGCCGCCCCGCTCTACAGTCGCATCTTCTCTAATGTGCAGACC	CTCTAATTGCTGGTGGCACTG	60.832	0.52381	GGTCTGCACATTAGAGAAGATGC	60.284	0.478261	158
isoform_133957_13247_3	GCCGCCGCCGCCGCCGCC	GCC(3*6)	491	18	TCTAATTGCTGGTGGCACTGCCTCTGCCATGAAAGCTGCTGGAGGTGGGGCCACCGCCA[GCCGCCGCCGCCGCCGCC]ACCCACCCACCCTCCTTGTTAGTGCAAGCACGGCTTATGCCGCCCCGCTCTACAGTCGCATCTTCTCTAATGTGCAGACC	TCTAATTGCTGGTGGCACTG	59.864	0.5	GGTCTGCACATTAGAGAAGATGC	60.284	0.478261	157
isoform_134020_13269_1	CTCTCTCTCTCTCTCTCT	CT(2*9)	2540	18	GCTTCCTTTGTGAAGTTGTGAGA[CTCTCTCTCTCTCTCTCT]CCCCACACCCACTGTTCCTCAATGCACAAGCCCTCTCAGCCTTCAGGGAACACGAACATTCTCCGGCACACTCAAAATTGAAGCTAT	GCTTCCTTTGTGAAGTTGTGAGA	60.816	0.434783	ATAGCTTCAATTTTGAGTGTGCC	59.685	0.391304	128
isoform_134020_13269_2	CTCTCTCTCTCTCTCTCT	CT(2*9)	2540	18	CTTCCTTTGTGAAGTTGTGAGA[CTCTCTCTCTCTCTCTCT]CCCCACACCCACTGTTCCTCAATGCACAAGCCCTCTCAGCCTTCAGGGAACACGAACATTCTCCGGCACACTCAAAATTGAAGCTAT	CTTCCTTTGTGAAGTTGTGAGAC	58.031	0.434783	ATAGCTTCAATTTTGAGTGTGCC	59.685	0.391304	127
isoform_134020_13269_3	CTCTCTCTCTCTCTCTCT	CT(2*9)	2540	18	GCTTCCTTTGTGAAGTTGTGAGA[CTCTCTCTCTCTCTCTCT]CCCCACACCCACTGTTCCTCAATGCACAAGCCCTCTCAGCCTTCAGGGAACACGAACATTCTCCGGCACACTCAAAATTGAAGCTAT	GCTTCCTTTGTGAAGTTGTGAG	59.029	0.454545	ATAGCTTCAATTTTGAGTGTGCC	59.685	0.391304	128
isoform_134020_13269_4	CTCTCTCTCTCTCTCTCT	CT(2*9)	2540	18	GCTTCCTTTGTGAAGTTGTGAGA[CTCTCTCTCTCTCTCTCT]CCCCACACCCACTGTTCCTCAATGCACAAGCCCTCTCAGCCTTCAGGGAACACGAACATTCTCCGGCACACTCAAAATTGAAGCTATTATGTATGGCCATCACATTTTTGCAAGTTTC	GCTTCCTTTGTGAAGTTGTGAGA	60.816	0.434783	GAAACTTGCAAAAATGTGATGG	59.496	0.363636	159
isoform_134020_13269_5	CTCTCTCTCTCTCTCTCT	CT(2*9)	2540	18	ATGGGCTTCCTTTGTGAAGTTGTGAGA[CTCTCTCTCTCTCTCTCT]CCCCACACCCACTGTTCCTCAATGCACAAGCCCTCTCAGCCTTCAGGGAACACGAACATTCTCCGGCACACTCAAAATTGAAGCTAT	ATGGGCTTCCTTTGTGAAGTT	59.99	0.428571	ATAGCTTCAATTTTGAGTGTGCC	59.685	0.391304	132
isoform_134031_13270_1	TGTGTGTGTGTG	TG(2*6)	191	12	ACTGCTATTAAGGTTTTGCATCGACATAGCCATGGGGATGCTTGGGACCCTAGGTGCGTGTGTGACCA[TGTGTGTGTGTG]GTGTCTCAACGCCTGCTATATCACT	ACTGCTATTAAGGTTTTGCATCG	59.712	0.391304	AGTGATATAGCAGGCGTTGAGAC	59.824	0.478261	105
isoform_134031_13270_2	TGTGTGTGTGTG	TG(2*6)	191	12	CTAAGGGGATAGGGTTAGGGTTCGGCCCTCGGGTCTGTAAGTTGGGGTTTCTAACTGCTATTAAGGTTTTGCATCGACATAGCCATGGGGATGCTTGGGACCCTAGGTGCGTGTGTGACCA[TGTGTGTGTGTG]GTGTCTCAACGCCTGCTATATCACT	CTAAGGGGATAGGGTTAGGGTTC	60.409	0.521739	AGTGATATAGCAGGCGTTGAGAC	59.824	0.478261	158
isoform_134031_13270_3	TGTGTGTGTGTG	TG(2*6)	191	12	TTAAGGTTTTGCATCGACATAGCCATGGGGATGCTTGGGACCCTAGGTGCGTGTGTGACCA[TGTGTGTGTGTG]GTGTCTCAACGCCTGCTATATCACT	TTAAGGTTTTGCATCGACATAGC	60.49	0.391304	AGTGATATAGCAGGCGTTGAGAC	59.824	0.478261	98
isoform_134031_13270_4	TGTGTGTGTGTG	TG(2*6)	191	12	GCTATTAAGGTTTTGCATCGACATAGCCATGGGGATGCTTGGGACCCTAGGTGCGTGTGTGACCA[TGTGTGTGTGTG]GTGTCTCAACGCCTGCTATATCACT	GCTATTAAGGTTTTGCATCGACA	60.49	0.391304	AGTGATATAGCAGGCGTTGAGAC	59.824	0.478261	102
isoform_134031_13270_5	TGTGTGTGTGTG	TG(2*6)	191	12	TGCTATTAAGGTTTTGCATCGACATAGCCATGGGGATGCTTGGGACCCTAGGTGCGTGTGTGACCA[TGTGTGTGTGTG]GTGTCTCAACGCCTGCTATATCACT	TGCTATTAAGGTTTTGCATCGAC	60.49	0.391304	AGTGATATAGCAGGCGTTGAGAC	59.824	0.478261	103
isoform_134031_13271_1	CACACACACACA	CA(2*6)	528	12	CGCATCAGCTAGTTTTACGAGATTGCACC[CACACACACACA]CCCGCATGCCGCAGGGGTGAACCCCTCAGCCTTTACAGCTAGGCTAACTCCCCTTTGACCCCCCAAATGGCAAGAGGTTCACCGTTTAGCAGGACAAATCTATGGCAT	CGCATCAGCTAGTTTTACGAGAT	59.952	0.434783	ATGCCATAGATTTGTCCTGCTAA	60.003	0.391304	149
isoform_134031_13271_2	CACACACACACA	CA(2*6)	528	12	CGCATCAGCTAGTTTTACGAGATTGCACC[CACACACACACA]CCCGCATGCCGCAGGGGTGAACCCCTCAGCCTTTACAGCTAGGCTAACTCCCCTTTGACCCCCCAAATGGCAAGAGGTTCACCGTTTAGCAGGACAAATCTATGGCATT	CGCATCAGCTAGTTTTACGAGAT	59.952	0.434783	AATGCCATAGATTTGTCCTGCTA	60.003	0.391304	150
isoform_134031_13271_3	CACACACACACA	CA(2*6)	528	12	CGCATCAGCTAGTTTTACGAGATTGCACC[CACACACACACA]CCCGCATGCCGCAGGGGTGAACCCCTCAGCCTTTACAGCTAGGCTAACTCCCCTTTGACCCCCCAAATGGCAAGAGGTTCACCGTTTAGCAGGACAAATCTATG	CGCATCAGCTAGTTTTACGAGAT	59.952	0.434783	CATAGATTTGTCCTGCTAAACGG	60.03	0.434783	145
isoform_134031_13271_4	CACACACACACA	CA(2*6)	528	12	CGCATCAGCTAGTTTTACGAGATTGCACC[CACACACACACA]CCCGCATGCCGCAGGGGTGAACCCCTCAGCCTTTACAGCTAGGCTAACTCCCCTTTGACCCCCCAAATGGCAAGAGGTTCACCGTTTAGCAGGACAAATCTATGG	CGCATCAGCTAGTTTTACGAGAT	59.952	0.434783	CCATAGATTTGTCCTGCTAAACG	60.03	0.434783	146
isoform_134031_13271_5	CACACACACACA	CA(2*6)	528	12	CGCATCAGCTAGTTTTACGAGATTGCACC[CACACACACACA]CCCGCATGCCGCAGGGGTGAACCCCTCAGCCTTTACAGCTAGGCTAACTCC	CGCATCAGCTAGTTTTACGAGAT	59.952	0.434783	GGAGTTAGCCTAGCTGTAAAGGC	59.957	0.521739	92
isoform_134062_13273_1	TGTGTGTGTGTGTGTG	TG(2*8)	343	16	CCCATCCTTCCATAGTGATTGTATTTTACCCAATTGTTGAGAGAATTATGTGGTTTATTGGCTCCTCATGCTGATTTTTT[TGTGTGTGTGTGTGTG]GTTATGCGTCTGAGTTGAGAGGACAATTGGGTCGCCTAGCTCTTCTCACTCCTTCTGCATGTTT	CCCATCCTTCCATAGTGATTGTA	60.082	0.434783	AAACATGCAGAAGGAGTGAGAAG	59.936	0.434783	160
isoform_134062_13273_2	TGTGTGTGTGTGTGTG	TG(2*8)	343	16	CCCATCCTTCCATAGTGATTGTATTTTACCCAATTGTTGAGAGAATTATGTGGTTTATTGGCTCCTCATGCTGATTTTTT[TGTGTGTGTGTGTGTG]GTTATGCGTCTGAGTTGAGAGGACAATTGGGTCGCCTAGCTCTTCTCACTCCTTCTGCATGT	CCCATCCTTCCATAGTGATTGTA	60.082	0.434783	ACATGCAGAAGGAGTGAGAAGAG	60.067	0.478261	158
isoform_134062_13273_3	TGTGTGTGTGTGTGTG	TG(2*8)	343	16	CCCATCCTTCCATAGTGATTGTATTTTACCCAATTGTTGAGAGAATTATGTGGTTTATTGGCTCCTCATGCTGATTTTTT[TGTGTGTGTGTGTGTG]GTTATGCGTCTGAGTTGAGAGGACAATTGG	CCCATCCTTCCATAGTGATTGTA	60.082	0.434783	CCAATTGTCCTCTCAACTCAGAC	60.16	0.478261	126
isoform_134062_13273_4	TGTGTGTGTGTGTGTG	TG(2*8)	343	16	CCCATCCTTCCATAGTGATTGTATTTTACCCAATTGTTGAGAGAATTATGTGGTTTATTGGCTCCTCATGCTGATTTTTT[TGTGTGTGTGTGTGTG]GTTATGCGTCTGAGTTGAGAGGACAATTGGGTCGCCTAGCTCTTCTCACTCCTTCT	CCCATCCTTCCATAGTGATTGTA	60.082	0.434783	AGAAGGAGTGAGAAGAGCTAGGC	59.821	0.521739	152
isoform_134062_13273_5	TGTGTGTGTGTGTGTG	TG(2*8)	343	16	TATGTGGTTTATTGGCTCCTCATGCTGATTTTTT[TGTGTGTGTGTGTGTG]GTTATGCGTCTGAGTTGAGAGGACAATTGGGTCGCCTAGCTCTTCTCACTCCTTCTGCATGT	TATGTGGTTTATTGGCTCCTCAT	59.75	0.391304	ACATGCAGAAGGAGTGAGAAGAG	60.067	0.478261	112
isoform_134092_13278_1	TCTCTCTCTCTCTCTCTCTCTCTCTCTCTCTCTCTCTCTC	TC(2*20)	298	40	AGCCACAGCTGGAGATGGCGGTGGGGCGGAATTGGGGGGGCCAT[TCTCTCTCTCTCTCTCTCTCTCTCTCTCTCTCTCTCTCTC]TGCTCCATCTCGCCAGCTGCAGCAACCTTTGTTTTCTGCGGACGGCTCTTCGAAGATGCTCAATACGAGCGTC	AGCCACAGCTGGAGATGG	59.936	0.611111	GACGCTCGTATTGAGCATCTT	59.495	0.47619	157
isoform_134092_13278_2	TCTCTCTCTCTCTCTCTCTCTCTCTCTCTCTCTCTCTCTC	TC(2*20)	298	40	AGCCACAGCTGGAGATGGCGGTGGGGCGGAATTGGGGGGGCCAT[TCTCTCTCTCTCTCTCTCTCTCTCTCTCTCTCTCTCTCTC]TGCTCCATCTCGCCAGCTGCAGCAACCTTTGTTTTCTGCG	AGCCACAGCTGGAGATGG	59.936	0.611111	CGCAGAAAACAAAGGTTGCT	60.42	0.45	124
isoform_134092_13278_3	TCTCTCTCTCTCTCTCTCTCTCTCTCTCTCTCTCTCTCTC	TC(2*20)	298	40	AGCCACAGCTGGAGATGGCGGTGGGGCGGAATTGGGGGGGCCAT[TCTCTCTCTCTCTCTCTCTCTCTCTCTCTCTCTCTCTCTC]TGCTCCATCTCGCCAGCTGCAGCAACCTTTGTTTTCTGCGGAC	AGCCACAGCTGGAGATGG	59.936	0.611111	GTCCGCAGAAAACAAAGGTT	59.218	0.45	127
isoform_134092_13278_4	TCTCTCTCTCTCTCTCTCTCTCTCTCTCTCTCTCTCTCTC	TC(2*20)	298	40	AGCCACAGCTGGAGATGGCGGTGGGGCGGAATTGGGGGGGCCAT[TCTCTCTCTCTCTCTCTCTCTCTCTCTCTCTCTCTCTCTC]TGCTCCATCTCGCCAGCTGCAGCAACCTTTGTTTTCTGCGGAC	AGCCACAGCTGGAGATGG	59.936	0.611111	GTCCGCAGAAAACAAAGGTTG	61.913	0.47619	127
isoform_134092_13278_5	TCTCTCTCTCTCTCTCTCTCTCTCTCTCTCTCTCTCTCTC	TC(2*20)	298	40	ACAGCTGGAGATGGCGGTGGGGCGGAATTGGGGGGGCCAT[TCTCTCTCTCTCTCTCTCTCTCTCTCTCTCTCTCTCTCTC]TGCTCCATCTCGCCAGCTGCAGCAACCTTTGTTTTCTGCGGACGGCTCTTCGAAGATGCTCAATACGAGCGTC	ACAGCTGGAGATGGCGGT	61.854	0.611111	GACGCTCGTATTGAGCATCTTC	61.276	0.5	153
isoform_134099_13282_1	CTCTCTCTCTCTCTCTCTCTCTCT	CT(2*12)	923	24	ATTATGTGCTTGCCCTCTATGAACACATGGGGAATTTTTAAATAGCTTTGCGGGGTGGTTAATATCACGAAATTATTAATAGGAATATAGTGCG[CTCTCTCTCTCTCTCTCTCTCTCT]AGGATGTGTCAAGAAATGGTATATCTTGAAGCCTTGTCC	ATTATGTGCTTGCCCTCTATGAA	60.003	0.391304	GGACAAGGCTTCAAGATATACCA	59.515	0.434783	157
isoform_134099_13282_2	CTCTCTCTCTCTCTCTCTCTCTCT	CT(2*12)	923	24	GAATTTTTAAATAGCTTTGCGGGGTGGTTAATATCACGAAATTATTAATAGGAATATAGTGCG[CTCTCTCTCTCTCTCTCTCTCTCT]AGGATGTGTCAAGAAATGGTATATCTTGAAGCCTTGTCC	GAATTTTTAAATAGCTTTGCGGG	60.307	0.347826	GGACAAGGCTTCAAGATATACCA	59.515	0.434783	126
isoform_134099_13282_3	CTCTCTCTCTCTCTCTCTCTCTCT	CT(2*12)	923	24	GGAATTTTTAAATAGCTTTGCGGGGTGGTTAATATCACGAAATTATTAATAGGAATATAGTGCG[CTCTCTCTCTCTCTCTCTCTCTCT]AGGATGTGTCAAGAAATGGTATATCTTGAAGCCTTGTCC	GGAATTTTTAAATAGCTTTGCGG	60.307	0.347826	GGACAAGGCTTCAAGATATACCA	59.515	0.434783	127
isoform_134099_13282_4	CTCTCTCTCTCTCTCTCTCTCTCT	CT(2*12)	923	24	GGGAATTTTTAAATAGCTTTGCGGGGTGGTTAATATCACGAAATTATTAATAGGAATATAGTGCG[CTCTCTCTCTCTCTCTCTCTCTCT]AGGATGTGTCAAGAAATGGTATATCTTGAAGCCTTGTCC	GGGAATTTTTAAATAGCTTTGCG	60.307	0.347826	GGACAAGGCTTCAAGATATACCA	59.515	0.434783	128
isoform_134100_13284_1	CTCTCTCTCTCTCT	CT(2*7)	408	14	GAGGCAGATCTCTCTGCATACCCCCGACGGAGACG[CTCTCTCTCTCTCT]GTGTATTTGTTTCGCAAGGCACGCGCCCCGGCATATTTCTCTCTCACTGTTGTGGGTAGCT	GAGGCAGATCTCTCTGCATACC	60.378	0.545455	AGCTACCCACAACAGTGAGAGAG	59.989	0.521739	110
isoform_134100_13284_2	CTCTCTCTCTCTCT	CT(2*7)	408	14	GAGGCAGATCTCTCTGCATACCCCCGACGGAGACG[CTCTCTCTCTCTCT]GTGTATTTGTTTCGCAAGGCACGCGCCCCGGCATATTTCTCTCTCACTGTTGTGGGTAGCTATGGCTTCATGCACCTGCATCAAGCTGTATTCCAGCAGAAACATATGGC	GAGGCAGATCTCTCTGCATACC	60.378	0.545455	GCCATATGTTTCTGCTGGAATAC	59.883	0.434783	159
isoform_134100_13284_3	CTCTCTCTCTCTCT	CT(2*7)	408	14	GAGGCAGATCTCTCTGCATACCCCCGACGGAGACG[CTCTCTCTCTCTCT]GTGTATTTGTTTCGCAAGGCACGCGCCCCGGCATATTTCTCTCTCACTGTTGTGGGTAGCTATGGCTTCATGCACCTGCATCAAGCTGTATTCCAGCAGAAACAT	GAGGCAGATCTCTCTGCATACC	60.378	0.545455	ATGTTTCTGCTGGAATACAGCTT	59.342	0.391304	154
isoform_134100_13284_4	CTCTCTCTCTCTCT	CT(2*7)	408	14	GAGGCAGATCTCTCTGCATACCCCCGACGGAGACG[CTCTCTCTCTCTCT]GTGTATTTGTTTCGCAAGGCACGCGCCCCGGCATATTTCTCTCTCACTGTTGTGGGTAGCTATG	GAGGCAGATCTCTCTGCATACC	60.378	0.545455	CATAGCTACCCACAACAGTGAGA	59.319	0.478261	113
isoform_134113_13286_4	GGGGGGGGGGGG	G(1*12)	1168	12	AATTCGATAATATGGGGGTGGTGGGGGGGGGGGGCGGGGGGGGGGGGAGG[GAGAGAGAGAGAGAGAGAGAGA]TAGTCATAGATGTATCCGATGACTAGGCTTAAGATTAAATTTCAAAAAATGGGAATGTGGGTTTTGATATAC	AATTCGATAATATGGGGGTGGT	60.498	0.409091	GTATATCAAAACCCACATTCCCA	59.836	0.391304	144
isoform_134113_13287_4	GAGAGAGAGAGAGAGAGAGAGA	GA(2*11)	1183	22	AATTCGATAATATGGGGGTGGTGGGGGGGGGGGGCGGGGGGGGGGGGAGG[GAGAGAGAGAGAGAGAGAGAGA]TAGTCATAGATGTATCCGATGACTAGGCTTAAGATTAAATTTCAAAAAATGGGAATGTGGGTTTTGATATAC	AATTCGATAATATGGGGGTGGT	60.498	0.409091	GTATATCAAAACCCACATTCCCA	59.836	0.391304	144
isoform_134117_13288_1	TCTCTCTCTCTCTCTCTC	TC(2*9)	173	18	GGTCCTCAGAAAGTTCAGGACTCTCTCTCATCAAT[TCTCTCTCTCTCTCTCTC]CTCTCTCTGGAGTCCTGTGTCTGTGCTTCACAAGCAAATACAAGAACTTATCAGAAAGTCAAGACTCCATTACTGCACATGACAAACTGTCAAAT	GGTCCTCAGAAAGTTCAGGACTC	60.648	0.521739	ATTTGACAGTTTGTCATGTGCAG	60.088	0.391304	148
isoform_134117_13288_3	TCTCTCTCTCTCTCTCTC	TC(2*9)	173	18	GGTCCTCAGAAAGTTCAGGACTCTCTCTCATCAAT[TCTCTCTCTCTCTCTCTC]CTCTCTCTGGAGTCCTGTGTCTGTGCTTCACAAGCAAATACAAGAACTTATCAGAAAGTCAAGACTCCATTACTGCACATGACAAAC	GGTCCTCAGAAAGTTCAGGACTC	60.648	0.521739	GTTTGTCATGTGCAGTAATGGAG	59.553	0.434783	140
isoform_134117_13288_4	TCTCTCTCTCTCTCTCTC	TC(2*9)	173	18	GGTCCTCAGAAAGTTCAGGACTCTCTCTCATCAAT[TCTCTCTCTCTCTCTCTC]CTCTCTCTGGAGTCCTGTGTCTGTGCTTCACAAGCAAATACAAGAACTTATCAGAAAGTCAAGACTCCATTACTGCACATGACAAACTG	GGTCCTCAGAAAGTTCAGGACTC	60.648	0.521739	CAGTTTGTCATGTGCAGTAATGG	60.467	0.434783	142
isoform_134117_13288_5	TCTCTCTCTCTCTCTCTC	TC(2*9)	173	18	GGTCCTCAGAAAGTTCAGGACTCTCTCTCATCAAT[TCTCTCTCTCTCTCTCTC]CTCTCTCTGGAGTCCTGTGTCTGTGCTTCACAAGCAAATACAAGAACTTATCAGAAAGTCAAGACTCCATTACTGCACATGACAAACTGTCAAA	GGTCCTCAGAAAGTTCAGGACTC	60.648	0.521739	TTTGACAGTTTGTCATGTGCAGT	60.64	0.391304	147
isoform_134137_13308_1	AGAAGAAGAAGAAGAAGA	AGA(3*6)	409	18	TTTGGGTGGCTATGTGTAAATTCTCTTATATTTTTCTGTACGATG[AGAAGAAGAAGAAGAAGA]GATCTGACAACGTTCAACGTCCTCGGAACAATCCCAAGAAACCTTCTATCAAATGAGTCTTGAACCCAAGAC	TTTGGGTGGCTATGTGTAAATTC	60.121	0.391304	GTCTTGGGTTCAAGACTCATTTG	60.026	0.434783	135
isoform_134137_13308_2	AGAAGAAGAAGAAGAAGA	AGA(3*6)	409	18	GATTTTGGGTGGCTATGTGTAAATTCTCTTATATTTTTCTGTACGATG[AGAAGAAGAAGAAGAAGA]GATCTGACAACGTTCAACGTCCTCGGAACAATCCCAAGAAACCTTCTATCAAATGAGTCTTGAACCCAAGAC	GATTTTGGGTGGCTATGTGTAAA	60.121	0.391304	GTCTTGGGTTCAAGACTCATTTG	60.026	0.434783	138
isoform_134137_13308_3	AGAAGAAGAAGAAGAAGA	AGA(3*6)	409	18	TTTGGGTGGCTATGTGTAAATTCTCTTATATTTTTCTGTACGATG[AGAAGAAGAAGAAGAAGA]GATCTGACAACGTTCAACGTCCTCGGAACAATCCCAAGAAACCTTCTATCAAATGAGTCTTGAACCCAAGACCTCGTACTTTA	TTTGGGTGGCTATGTGTAAATTC	60.121	0.391304	TAAAGTACGAGGTCTTGGGTTCA	60.042	0.434783	146
isoform_134137_13308_4	AGAAGAAGAAGAAGAAGA	AGA(3*6)	409	18	GATTTTGGGTGGCTATGTGTAAATTCTCTTATATTTTTCTGTACGATG[AGAAGAAGAAGAAGAAGA]GATCTGACAACGTTCAACGTCCTCGGAACAATCCCAAGAAACCTTCTATCAAATGAGTCTTGAACCCAAGACCTCGTACTTTA	GATTTTGGGTGGCTATGTGTAAA	60.121	0.391304	TAAAGTACGAGGTCTTGGGTTCA	60.042	0.434783	149
isoform_134137_13308_5	AGAAGAAGAAGAAGAAGA	AGA(3*6)	409	18	TTGGGTGGCTATGTGTAAATTCTCTTATATTTTTCTGTACGATG[AGAAGAAGAAGAAGAAGA]GATCTGACAACGTTCAACGTCCTCGGAACAATCCCAAGAAACCTTCTATCAAATGAGTCTTGAACCCAAGAC	TTGGGTGGCTATGTGTAAATTCT	59.786	0.391304	GTCTTGGGTTCAAGACTCATTTG	60.026	0.434783	134
isoform_134241_13318_1	ACACACACACACACAC	AC(2*8)	336	16	GGAACAAAATCCACCAAGTGTAATGCAAAACAGCCCCAACGGCTCCCTCTTACGCTCTTGGTCACTGGACAGTGCGCTCGAGTACATCACG[ACACACACACACACAC]AACACACTCCCTTCTCGTCTCTCATCTCCTCTTG	GGAACAAAATCCACCAAGTGTAA	60.136	0.391304	CAAGAGGAGATGAGAGACGAGAA	60.139	0.478261	141
isoform_134241_13318_2	ACACACACACACACAC	AC(2*8)	336	16	ACAAAATCCACCAAGTGTAATGCAAAACAGCCCCAACGGCTCCCTCTTACGCTCTTGGTCACTGGACAGTGCGCTCGAGTACATCACG[ACACACACACACACAC]AACACACTCCCTTCTCGTCTCTCATCTCCTCTTG	ACAAAATCCACCAAGTGTAATGC	60.163	0.391304	CAAGAGGAGATGAGAGACGAGAA	60.139	0.478261	138
isoform_134241_13318_3	ACACACACACACACAC	AC(2*8)	336	16	GGAACAAAATCCACCAAGTGTAATGCAAAACAGCCCCAACGGCTCCCTCTTACGCTCTTGGTCACTGGACAGTGCGCTCGAGTACATCACG[ACACACACACACACAC]AACACACTCCCTTCTCGTCTCTCATCTCCTCTTGAG	GGAACAAAATCCACCAAGTGTAA	60.136	0.391304	CTCAAGAGGAGATGAGAGACGAG	59.77	0.521739	143
isoform_134241_13318_4	ACACACACACACACAC	AC(2*8)	336	16	ACAAAATCCACCAAGTGTAATGCAAAACAGCCCCAACGGCTCCCTCTTACGCTCTTGGTCACTGGACAGTGCGCTCGAGTACATCACG[ACACACACACACACAC]AACACACTCCCTTCTCGTCTCTCATCTCCTCTTGAG	ACAAAATCCACCAAGTGTAATGC	60.163	0.391304	CTCAAGAGGAGATGAGAGACGAG	59.77	0.521739	140
isoform_134241_13318_5	ACACACACACACACAC	AC(2*8)	336	16	GGAACAAAATCCACCAAGTGTAATGCAAAACAGCCCCAACGGCTCCCTCTTACGCTCTTGGTCACTGGACAGTGCGCTCGAGTACATCACG[ACACACACACACACAC]AACACACTCCCTTCTCGTCTCTCATCTCCTCTTGAGT	GGAACAAAATCCACCAAGTGTAA	60.136	0.391304	ACTCAAGAGGAGATGAGAGACGA	59.636	0.478261	144
isoform_134254_13321_1	CTGCTGCTGCTGCTG	CTG(3*5)	772	15	CTTCCTACTGCCTATGGCTACTGCCCAAGGTTCTA[CTGCTGCTGCTGCTG]CTTCTTACTTGTGATCAGAGAGACTGACTGATCTGATGACTGAAGAGAATGGCGCGTGAGGGGCATCTTTTATATGTGTCAGATGCGGTTG	CTTCCTACTGCCTATGGCTACTG	59.484	0.521739	CAACCGCATCTGACACATATAAA	59.903	0.391304	141
isoform_134254_13321_2	CTGCTGCTGCTGCTG	CTG(3*5)	772	15	CTTCCTACTGCCTATGGCTACTGCCCAAGGTTCTA[CTGCTGCTGCTGCTG]CTTCTTACTTGTGATCAGAGAGACTGACTGATCTGATGACTGAAGAGAATGGCGCGTGAGGGGCATCTTTTATATGTG	CTTCCTACTGCCTATGGCTACTG	59.484	0.521739	CACATATAAAAGATGCCCCTCAC	59.75	0.434783	128
isoform_134254_13321_3	CTGCTGCTGCTGCTG	CTG(3*5)	772	15	CTTCCTACTGCCTATGGCTACTGCCCAAGGTTCTA[CTGCTGCTGCTGCTG]CTTCTTACTTGTGATCAGAGAGACTGACTGATCTGATGACTGAAGAGAATGGCGCGTGAGGGGCATCTTTTATATGTGT	CTTCCTACTGCCTATGGCTACTG	59.484	0.521739	ACACATATAAAAGATGCCCCTCA	59.75	0.391304	129
isoform_134287_13325_1	ACACACACACACACACACACACAC	AC(2*12)	627	24	TTTCAGTTCTGTTCGTATGTTGCGGAAATTTCTGTCCTTGTTGGCCCCCCCCCCCCCCCCCA[ACACACACACACACACACACACAC]CAAAATCTGTGACTCCATGTGGTATGCATGTCAGACCTCCAGACGTAGGCCAAACTTCAAAGT	TTTCAGTTCTGTTCGTATGTTGC	59.326	0.391304	ACTTTGAAGTTTGGCCTACGTCT	60.556	0.434783	149
isoform_134287_13325_2	ACACACACACACACACACACACAC	AC(2*12)	627	24	TTGTGTGATTTCAAGTTCGAGTGTTAAGCTCTTTCAGTTCTGTTCGTATGTTGCGGAAATTTCTGTCCTTGTTGGCCCCCCCCCCCCCCCCCA[ACACACACACACACACACACACAC]CAAAATCTGTGACTCCATGTGGTATGCATGTC	TTGTGTGATTTCAAGTTCGAGTG	60.196	0.391304	GACATGCATACCACATGGAGTC	60.271	0.5	149
isoform_134287_13325_3	ACACACACACACACACACACACAC	AC(2*12)	627	24	CGTCACTTCGCTTCTATTCTTGTGTGATTTCAAGTTCGAGTGTTAAGCTCTTTCAGTTCTGTTCGTATGTTGCGGAAATTTCTGTCCTTGTTGGCCCCCCCCCCCCCCCCCA[ACACACACACACACACACACACAC]CAAAATCTGTGACTCCATGTGGTA	CGTCACTTCGCTTCTATTCTTGT	59.961	0.434783	TACCACATGGAGTCACAGATTTT	58.499	0.391304	160
isoform_134287_13325_4	ACACACACACACACACACACACAC	AC(2*12)	627	24	TGTGTGATTTCAAGTTCGAGTGTTAAGCTCTTTCAGTTCTGTTCGTATGTTGCGGAAATTTCTGTCCTTGTTGGCCCCCCCCCCCCCCCCCA[ACACACACACACACACACACACAC]CAAAATCTGTGACTCCATGTGGTATGCATGTC	TGTGTGATTTCAAGTTCGAGTGT	59.694	0.391304	GACATGCATACCACATGGAGTC	60.271	0.5	148
isoform_134287_13325_5	ACACACACACACACACACACACAC	AC(2*12)	627	24	TTGTGTGATTTCAAGTTCGAGTGTTAAGCTCTTTCAGTTCTGTTCGTATGTTGCGGAAATTTCTGTCCTTGTTGGCCCCCCCCCCCCCCCCCA[ACACACACACACACACACACACAC]CAAAATCTGTGACTCCATGTGGTA	TTGTGTGATTTCAAGTTCGAGTG	60.196	0.391304	TACCACATGGAGTCACAGATTTT	58.499	0.391304	141
isoform_134401_13336_2	CTCTCTCTCTCTCTCTCTCTCTCTCTCT	CT(2*14)	796	28	GGCTATGAAGAAATCTTCCAACAATGAAGATTTGTAAGTCCATCCTTTTGGGCTTGCCCTTGACTCTTCCCCATGTATGTCCC[CTCTCTCTCTCTCTCTCTCTCTCTCTCT]AAGCTGAGTTACAAAGTTTTGACCTCTATCAGAGCAAGG	GGCTATGAAGAAATCTTCCAACA	59.622	0.391304	CCTTGCTCTGATAGAGGTCAAAA	59.9	0.434783	150
isoform_134427_13341_1	CTCTCTCTCTCTCTCT	CT(2*8)	3256	16	CCGATTCTTGACAATGTTCTC[CTCTCTCTCTCTCTCT]CCCCCAACGCCTGATGTTCGGGGCTTGGGTCTTCTTCATGCCCGCAGGTGGCGCCACTTCCAGCGATGGGCGAATTCGGAGTAACCCTCGGTCACGCTCCACCCTGTAAGCTAACTGGACAC	CCGATTCTTGACAATGTTCTCC	60.856	0.454545	GTGTCCAGTTAGCTTACAGGGTG	60.102	0.521739	159
isoform_134427_13341_2	CTCTCTCTCTCTCTCT	CT(2*8)	3256	16	GTTTCCCGATTCTTGACAATGTTCTC[CTCTCTCTCTCTCTCT]CCCCCAACGCCTGATGTTCGGGGCTTGGGTCTTCTTCATGCCCGCAGGTGGCGCCACTTCCAGCGATGGGCGAATTCGGAGTAACCCTCGGTCACGCTCCACCCTGTAAGCTAACTGG	GTTTCCCGATTCTTGACAATGTT	61.425	0.391304	CCAGTTAGCTTACAGGGTGGAG	60.178	0.545455	160
isoform_134427_13341_3	CTCTCTCTCTCTCTCT	CT(2*8)	3256	16	AGTTTCCCGATTCTTGACAATGTTCTC[CTCTCTCTCTCTCTCT]CCCCCAACGCCTGATGTTCGGGGCTTGGGTCTTCTTCATGCCCGCAGGTGGCGCCACTTCCAGCGATGGGCGAATTCGGAGTAACCCTCGGTCACGCTCCACCCTGTAAGCTAACTG	AGTTTCCCGATTCTTGACAATG	60.352	0.409091	CAGTTAGCTTACAGGGTGGAGC	60.315	0.545455	160
isoform_134427_13341_4	CTCTCTCTCTCTCTCT	CT(2*8)	3256	16	GTTTCCCGATTCTTGACAATGTTCTC[CTCTCTCTCTCTCTCT]CCCCCAACGCCTGATGTTCGGGGCTTGGGTCTTCTTCATGCCCGCAGGTGGCGCCACTTCCAGCGATGGGCGAATTCGGAGTAACCCTCGGTCACGCTCCACCCTGTAAGCTAACTG	GTTTCCCGATTCTTGACAATGTT	61.425	0.391304	CAGTTAGCTTACAGGGTGGAGC	60.315	0.545455	159
isoform_134427_13341_5	CTCTCTCTCTCTCTCT	CT(2*8)	3256	16	TTTCCCGATTCTTGACAATGTTCTC[CTCTCTCTCTCTCTCT]CCCCCAACGCCTGATGTTCGGGGCTTGGGTCTTCTTCATGCCCGCAGGTGGCGCCACTTCCAGCGATGGGCGAATTCGGAGTAACCCTCGGTCACGCTCCACCCTGTAAGCTAACTGG	TTTCCCGATTCTTGACAATGTT	60.702	0.363636	CCAGTTAGCTTACAGGGTGGAG	60.178	0.545455	159
isoform_134452_13349_1	TCTCTCTCTCTCTCTCTCTCTCTCTCTCTCTCTC	TC(2*17)	1058	34	GAGGGTGGTGTGGTGATGAGT[TCTCTCTCTCTCTCTCTCTCTCTCTCTCTCTCTC]TACACGCACAGCTGTGGCAAGGGCATGGCGGGCCAGCGTGGGAATGCATGAGGAGTTATAG	GAGGGTGGTGTGGTGATGA	60.382	0.578947	CTATAACTCCTCATGCATTCCCA	60.338	0.434783	116
isoform_134452_13349_2	TCTCTCTCTCTCTCTCTCTCTCTCTCTCTCTCTC	TC(2*17)	1058	34	GAGGGTGGTGTGGTGATGAGT[TCTCTCTCTCTCTCTCTCTCTCTCTCTCTCTCTC]TACACGCACAGCTGTGGCAAGGGCATGGCGGGCCAGCGTGGGAATGCATGAGGAGTTATAGG	GAGGGTGGTGTGGTGATGA	60.382	0.578947	CCTATAACTCCTCATGCATTCCC	61.019	0.478261	117
isoform_134452_13349_3	TCTCTCTCTCTCTCTCTCTCTCTCTCTCTCTCTC	TC(2*17)	1058	34	GAGGGTGGTGTGGTGATGAGT[TCTCTCTCTCTCTCTCTCTCTCTCTCTCTCTCTC]TACACGCACAGCTGTGGCAAGGGCATGGCGGGCCAGCGTGGGAATGCATGAGGAGTTATAGGG	GAGGGTGGTGTGGTGATGA	60.382	0.578947	CCCTATAACTCCTCATGCATTCC	61.019	0.478261	118
isoform_134452_13349_4	TCTCTCTCTCTCTCTCTCTCTCTCTCTCTCTCTC	TC(2*17)	1058	34	GAGGGTGGTGTGGTGATGAGT[TCTCTCTCTCTCTCTCTCTCTCTCTCTCTCTCTC]TACACGCACAGCTGTGGCAAGGGCATGGCGGGCCAGCGTGGGAATGCATGAGGAGTTATAGGGG	GAGGGTGGTGTGGTGATGA	60.382	0.578947	CCCCTATAACTCCTCATGCATTC	61.019	0.478261	119
isoform_134452_13349_5	TCTCTCTCTCTCTCTCTCTCTCTCTCTCTCTCTC	TC(2*17)	1058	34	AAGGGAGGGTGGTGTGGTGATGAGT[TCTCTCTCTCTCTCTCTCTCTCTCTCTCTCTCTC]TACACGCACAGCTGTGGCAAGGGCATGGCGGGCCAGCGTGGGAATGCATGAGGAGTTATA	AAGGGAGGGTGGTGTGGT	60.219	0.611111	TATAACTCCTCATGCATTCCCAC	60.218	0.434783	119
isoform_134558_13362_1	CTCTCTCTCTCTCT	CT(2*7)	406	14	AGCTGCTTGTCCTCAGTTTCTTCGAGGGCTCCGATCTTGAGCCAACAGCTGCTGCTAAGAGGCAGGGGATGTCGCCCAGGTTCGCCTCCAGAGCCGACACTCTG[CTCTCTCTCTCTCT]TCGCATTGAGGGACTCGCGCAGTAGAGGATTCGCTCTCTTT	AGCTGCTTGTCCTCAGTTTCTT	59.704	0.454545	AAAGAGAGCGAATCCTCTACTGC	60.517	0.478261	159
isoform_134558_13362_2	CTCTCTCTCTCTCT	CT(2*7)	406	14	AGCTGCTTGTCCTCAGTTTCTTCGAGGGCTCCGATCTTGAGCCAACAGCTGCTGCTAAGAGGCAGGGGATGTCGCCCAGGTTCGCCTCCAGAGCCGACACTCTG[CTCTCTCTCTCTCT]TCGCATTGAGGGACTCGCGCAGTAGAGGATTCGCTCTCTTT	AGCTGCTTGTCCTCAGTTTCTTC	61.42	0.478261	AAAGAGAGCGAATCCTCTACTGC	60.517	0.478261	159
isoform_134558_13362_3	CTCTCTCTCTCTCT	CT(2*7)	406	14	GCTTGTCCTCAGTTTCTTCGAGGGCTCCGATCTTGAGCCAACAGCTGCTGCTAAGAGGCAGGGGATGTCGCCCAGGTTCGCCTCCAGAGCCGACACTCTG[CTCTCTCTCTCTCT]TCGCATTGAGGGACTCGCGCAGTAGAGGATTCGCTCTCTTT	GCTTGTCCTCAGTTTCTTCGAG	60.548	0.5	AAAGAGAGCGAATCCTCTACTGC	60.517	0.478261	155
isoform_134558_13362_4	CTCTCTCTCTCTCT	CT(2*7)	406	14	GCTGCTTGTCCTCAGTTTCTTCGAGGGCTCCGATCTTGAGCCAACAGCTGCTGCTAAGAGGCAGGGGATGTCGCCCAGGTTCGCCTCCAGAGCCGACACTCTG[CTCTCTCTCTCTCT]TCGCATTGAGGGACTCGCGCAGTAGAGGATTCGCTCTCTTT	GCTGCTTGTCCTCAGTTTCTTC	60.557	0.5	AAAGAGAGCGAATCCTCTACTGC	60.517	0.478261	158
isoform_134558_13362_5	CTCTCTCTCTCTCT	CT(2*7)	406	14	CAGCTGCTTGTCCTCAGTTTCTTCGAGGGCTCCGATCTTGAGCCAACAGCTGCTGCTAAGAGGCAGGGGATGTCGCCCAGGTTCGCCTCCAGAGCCGACACTCTG[CTCTCTCTCTCTCT]TCGCATTGAGGGACTCGCGCAGTAGAGGATTCGCTCTCTTT	CAGCTGCTTGTCCTCAGTTTCT	61.113	0.5	AAAGAGAGCGAATCCTCTACTGC	60.517	0.478261	160
isoform_134567_13363_1	AGAGAGAGAGAG	AG(2*6)	196	12	GTGCCTCACAAAAATACGCTTAGGAAACTTGTAAACATGTACTTGGAAACTTTTATATACCAGACGTAGGCTTCATAGCATGAGCGTGGAGGT[AGAGAGAGAGAG]CGGCATGCGTACCTCTTAGATTGGGTT	GTGCCTCACAAAAATACGCTTAG	60.192	0.434783	AACCCAATCTAAGAGGTACGCAT	60.262	0.434783	132
isoform_134567_13363_2	AGAGAGAGAGAG	AG(2*6)	196	12	CCTCACAAAAATACGCTTAGGAAACTTGTAAACATGTACTTGGAAACTTTTATATACCAGACGTAGGCTTCATAGCATGAGCGTGGAGGT[AGAGAGAGAGAG]CGGCATGCGTACCTCTTAGATTGGGTT	CCTCACAAAAATACGCTTAGGAA	59.687	0.391304	AACCCAATCTAAGAGGTACGCAT	60.262	0.434783	129
isoform_134567_13363_3	AGAGAGAGAGAG	AG(2*6)	196	12	CCTCACAAAAATACGCTTAGGAAACTTGTAAACATGTACTTGGAAACTTTTATATACCAGACGTAGGCTTCATAGCATGAGCGTGGAGGT[AGAGAGAGAGAG]CGGCATGCGTACCTCTTAGATTGGGTTGTTGC	CCTCACAAAAATACGCTTAGGAA	59.687	0.391304	GCAACAACCCAATCTAAGAGGTA	59.552	0.434783	134
isoform_134567_13363_4	AGAGAGAGAGAG	AG(2*6)	196	12	CCTCACAAAAATACGCTTAGGAAACTTGTAAACATGTACTTGGAAACTTTTATATACCAGACGTAGGCTTCATAGCATGAGCGTGGAGGT[AGAGAGAGAGAG]CGGCATGCGTACCTCTTAGATTGGGTTGTTGCGTA	CCTCACAAAAATACGCTTAGGAA	59.687	0.391304	TACGCAACAACCCAATCTAAGAG	60.525	0.434783	137
isoform_134567_13363_5	AGAGAGAGAGAG	AG(2*6)	196	12	GTGCCTCACAAAAATACGCTTAGGAAACTTGTAAACATGTACTTGGAAACTTTTATATACCAGACGTAGGCTTCATAGCATGAGCGTGGAGGT[AGAGAGAGAGAG]CGGCATGCGTACCTCTTAGATTGGGTTGT	GTGCCTCACAAAAATACGCTTAG	60.192	0.434783	ACAACCCAATCTAAGAGGTACGC	60.753	0.478261	134
isoform_134601_13384_2	GAGAGAGAGAGAGAGAGAGAGAGAGAGAGAGA	GA(2*16)	394	32	TTGTAGTCTCTCATAAATGCGGCCTCGACCTGTCAAGCTCCCGTCGATGGAGGGCGACCCGTCGATGGAGGAGGGCCACAGCACATCTAAGGC[GAGAGAGAGAGAGAGAGAGAGAGAGAGAGAGA]TGAGAGAGATGAGTGAGGAGAGGAGAAGG	TTGTAGTCTCTCATAAATGCGGC	60.628	0.434783	CCTTCTCCTCTCCTCACTCATCT	60.384	0.521739	154
isoform_134601_13384_5	GAGAGAGAGAGAGAGAGAGAGAGAGAGAGAGA	GA(2*16)	394	32	TTGTAGTCTCTCATAAATGCGGCCTCGACCTGTCAAGCTCCCGTCGATGGAGGGCGACCCGTCGATGGAGGAGGGCCACAGCACATCTAAGGC[GAGAGAGAGAGAGAGAGAGAGAGAGAGAGAGA]TGAGAGAGATGAGTGAGGAGAGGAGA	TTGTAGTCTCTCATAAATGCGGC	60.628	0.434783	TCTCCTCTCCTCACTCATCTCTC	59.19	0.521739	151
isoform_13462_2657_4	CACACACACACACACACACACACACACACACACACA	CA(2*18)	1896	36	AGGCTCATTGTTCCCTTTCTTAGGAACTTGGCAATGAGCTCTGTGAGATGTACACCTCACCAAAGAAAGCACTCATACT[CACACACACACACACACACACACACACACACACACA]CTCACACACAAAACACAAATTCACCA	AGGCTCATTGTTCCCTTTCTTAG	60.134	0.434783	TGGTGAATTTGTGTTTTGTGTGT	60.218	0.347826	141
isoform_134680_13393_1	TGTGTGTGTGTGTG	TG(2*7)	889	14	GTTGTGCATGTACAGAGTCGTTGCATGTA[TGTGTGTGTGTGTG]TAAGATCATATACAGAGTTGTTGCATGTATGTGTGTATGTATGCACCGATGTATTGTATTTTCCTATTTTTATGTAGTCCTAAATGCATCTGTGCAGT	GTTGTGCATGTACAGAGTCGTTG	60.66	0.478261	ACTGCACAGATGCATTTAGGACT	60.206	0.434783	141
isoform_134680_13393_2	TGTGTGTGTGTGTG	TG(2*7)	889	14	TGTTGTGCATGTACAGAGTCGTTGCATGTA[TGTGTGTGTGTGTG]TAAGATCATATACAGAGTTGTTGCATGTATGTGTGTATGTATGCACCGATGTATTGTATTTTCCTATTTTTATGTAGTCCTAAATGCATCTGTGCAGT	TGTTGTGCATGTACAGAGTCGTT	60.66	0.434783	ACTGCACAGATGCATTTAGGACT	60.206	0.434783	142
isoform_134680_13393_3	TGTGTGTGTGTGTG	TG(2*7)	889	14	GTTGTTGTGCATGTACAGAGTCGTTGCATGTA[TGTGTGTGTGTGTG]TAAGATCATATACAGAGTTGTTGCATGTATGTGTGTATGTATGCACCGATGTATTGTATTTTCCTATTTTTATGTAGTCCTAAATGCATCTGTGCAGT	GTTGTTGTGCATGTACAGAGTCG	60.66	0.478261	ACTGCACAGATGCATTTAGGACT	60.206	0.434783	144
isoform_134680_13393_4	TGTGTGTGTGTGTG	TG(2*7)	889	14	ATGCAGGTGCATATAAAGAGTCGTTGTATGTGCATATGCAGAGTTGTTGTGCATGTACAGAGTCGTTGCATGTA[TGTGTGTGTGTGTG]TAAGATCATATACAGAGTTGTTGCATGTATGTGTGTATGTATGCACCG	ATGCAGGTGCATATAAAGAGTCG	60.522	0.434783	CGGTGCATACATACACACATACA	59.312	0.434783	136
isoform_134680_13393_5	TGTGTGTGTGTGTG	TG(2*7)	889	14	ATGCAGGTGCATATAAAGAGTCGTTGTATGTGCATATGCAGAGTTGTTGTGCATGTACAGAGTCGTTGCATGTA[TGTGTGTGTGTGTG]TAAGATCATATACAGAGTTGTTGCATGTATGTGTGTATGTATGCACCGATGTATTGTATTTTCCT	ATGCAGGTGCATATAAAGAGTCG	60.522	0.434783	AGGAAAATACAATACATCGGTGC	59.306	0.391304	153
isoform_134733_13402_1	GAGAGAGAGAGAGAGAGA	GA(2*9)	203	18	GACTAGAAAGCCTTCAGAGGACATGCAGGTTGGGTGAAGCAGAAGGAAGG[GAGAGAGAGAGAGAGAGA]GTTTCGGGTGTGTGCGCGCGCATTGAGAGGAGGAGCAATGGAGGAGGAGGGAGCGAAGTGGCCACGCGTGTTTTCTGAGCTGAGAGATGTG	GACTAGAAAGCCTTCAGAGGACA	59.18	0.478261	CACATCTCTCAGCTCAGAAAACA	59.671	0.434783	159
isoform_134733_13402_2	GAGAGAGAGAGAGAGAGA	GA(2*9)	203	18	AGACTAGAAAGCCTTCAGAGGACATGCAGGTTGGGTGAAGCAGAAGGAAGG[GAGAGAGAGAGAGAGAGA]GTTTCGGGTGTGTGCGCGCGCATTGAGAGGAGGAGCAATGGAGGAGGAGGGAGCGAAGTGGCCACGCGTGTTTTCTGAGCTGAGAGATGTG	AGACTAGAAAGCCTTCAGAGGACA	60.076	0.458333	CACATCTCTCAGCTCAGAAAACA	59.671	0.434783	160
isoform_134733_13402_3	GAGAGAGAGAGAGAGAGA	GA(2*9)	203	18	GACTAGAAAGCCTTCAGAGGACATGCAGGTTGGGTGAAGCAGAAGGAAGG[GAGAGAGAGAGAGAGAGA]GTTTCGGGTGTGTGCGCGCGCATTGAGAGGAGGAGCAATGGAGGAGGAGGGAGCGAAGTGGCCACGCGTGTTTTCTGAGCTGAGAGATGTG	GACTAGAAAGCCTTCAGAGGACAT	59.466	0.458333	CACATCTCTCAGCTCAGAAAACA	59.671	0.434783	159
isoform_134733_13402_4	GAGAGAGAGAGAGAGAGA	GA(2*9)	203	18	GACTAGAAAGCCTTCAGAGGACATGCAGGTTGGGTGAAGCAGAAGGAAGG[GAGAGAGAGAGAGAGAGA]GTTTCGGGTGTGTGCGCGCGCATTGAGAGGAGGAGCAATGGAGGAGGAGGGAGCGAAGTGGCCACGCGTGTTTTCTGAGCTGAGAGATG	GACTAGAAAGCCTTCAGAGGACA	59.18	0.478261	CATCTCTCAGCTCAGAAAACACG	61.471	0.478261	157
isoform_134733_13402_5	GAGAGAGAGAGAGAGAGA	GA(2*9)	203	18	GACTAGAAAGCCTTCAGAGGACATGCAGGTTGGGTGAAGCAGAAGGAAGG[GAGAGAGAGAGAGAGAGA]GTTTCGGGTGTGTGCGCGCGCATTGAGAGGAGGAGCAATGGAGGAGGAGGGAGCGAAGTGGCCACGCGTGTTTTCTGAGCTGAGAGATGTG	GACTAGAAAGCCTTCAGAGGACA	59.18	0.478261	CACATCTCTCAGCTCAGAAAACAC	60.476	0.458333	159
isoform_134738_13403_1	CACACACACACA	CA(2*6)	371	12	AGGAGCACAGAGCACAACACTATGTAATATCACACAACTACAAAGAGGTGATATTGGTTCTTGCC[CACACACACACA]TAGTATATATCTACACGATGATGCAATACCAAGAAAGCATTTCAGATAGACCGTTCTTGG	AGGAGCACAGAGCACAACACTAT	60.378	0.478261	CCAAGAACGGTCTATCTGAAATG	60.008	0.434783	137
isoform_134738_13403_2	CACACACACACA	CA(2*6)	371	12	AGGAGCACAGAGCACAACACTATGTAATATCACACAACTACAAAGAGGTGATATTGGTTCTTGCC[CACACACACACA]TAGTATATATCTACACGATGATGCAATACCAAGAAAGCAT	AGGAGCACAGAGCACAACACTAT	60.378	0.478261	ATGCTTTCTTGGTATTGCATCAT	59.883	0.347826	117
isoform_134738_13403_3	CACACACACACA	CA(2*6)	371	12	AGGAGCACAGAGCACAACACTATGTAATATCACACAACTACAAAGAGGTGATATTGGTTCTTGCC[CACACACACACA]TAGTATATATCTACACGATGATGCAATACCAAGAAAGCATTTCAG	AGGAGCACAGAGCACAACACTAT	60.378	0.478261	CTGAAATGCTTTCTTGGTATTGC	60.141	0.391304	122
isoform_134738_13403_4	CACACACACACA	CA(2*6)	371	12	AGGAGCACAGAGCACAACACTATGTAATATCACACAACTACAAAGAGGTGATATTGGTTCTTGCC[CACACACACACA]TAGTATATATCTACACGATGATGCAATACCAAGAAAGCATTTCAGATAGACCGTTCTTG	AGGAGCACAGAGCACAACACTAT	60.378	0.478261	CAAGAACGGTCTATCTGAAATGC	60.143	0.434783	136
isoform_134738_13403_5	CACACACACACA	CA(2*6)	371	12	AAGAGGTGATATTGGTTCTTGCC[CACACACACACA]TAGTATATATCTACACGATGATGCAATACCAAGAAAGCATTTCAGATAGACCGTTCTTGG	AAGAGGTGATATTGGTTCTTGCC	60.707	0.434783	CCAAGAACGGTCTATCTGAAATG	60.008	0.434783	95
isoform_134776_13405_1	TGCTGCTGCTGCTGCTGC	TGC(3*6)	446	18	AGAGAAAAAGGCCAACAGACTTTAATCAAGAATCACATGGAAAGGGTCCCAAATTAACGCCTTTGGAAGAAGCTGTCCATGCAGCGGCAGCAGCTGCTAA[TGCTGCTGCTGCTGCTGC]CGCTGAGGTGGCCAACACTAGTCGCGAAGTTTTAAAGTTGC	AGAGAAAAAGGCCAACAGACTTT	59.824	0.391304	GCAACTTTAAAACTTCGCGACTA	59.969	0.391304	159
isoform_134776_13405_2	TGCTGCTGCTGCTGCTGC	TGC(3*6)	446	18	AAGAGAAAAAGGCCAACAGACTTTAATCAAGAATCACATGGAAAGGGTCCCAAATTAACGCCTTTGGAAGAAGCTGTCCATGCAGCGGCAGCAGCTGCTAA[TGCTGCTGCTGCTGCTGC]CGCTGAGGTGGCCAACACTAGTCGCGAAGTTTTAAAGTTGC	AAGAGAAAAAGGCCAACAGACTT	59.824	0.391304	GCAACTTTAAAACTTCGCGACTA	59.969	0.391304	160
isoform_134776_13405_5	TGCTGCTGCTGCTGCTGC	TGC(3*6)	446	18	AGAGAAAAAGGCCAACAGACTTTAATCAAGAATCACATGGAAAGGGTCCCAAATTAACGCCTTTGGAAGAAGCTGTCCATGCAGCGGCAGCAGCTGCTAA[TGCTGCTGCTGCTGCTGC]CGCTGAGGTGGCCAACACTAGTCGCGAAGTTTTA	AGAGAAAAAGGCCAACAGACTTT	59.824	0.391304	TAAAACTTCGCGACTAGTGTTGG	60.676	0.434783	152
isoform_134805_13410_1	CTCTCTCTCTCTCT	CT(2*7)	386	14	ACACAGAGAAGGTGCTGGTGTATGAGGTGAGAG[CTCTCTCTCTCTCT]GCAGAGTCAATATTGGCGATAGGGGCGAGTTTGCGGCCAAGTGCAAGGCCGCATGCTTCTCTATGAGACAAGCTCTCCCACCTAGCTACATT	ACACAGAGAAGGTGCTGGTGTAT	60.11	0.478261	AATGTAGCTAGGTGGGAGAGCTT	59.83	0.478261	139
isoform_134805_13410_2	CTCTCTCTCTCTCT	CT(2*7)	386	14	ACACAGAGAAGGTGCTGGTGTATGAGGTGAGAG[CTCTCTCTCTCTCT]GCAGAGTCAATATTGGCGATAGGGGCGAGTTTGCGGCCAAGTGCAAGGCCGCATGCTTCTCTATGAGACAAGCTCTCCCACCTA	ACACAGAGAAGGTGCTGGTGTAT	60.11	0.478261	TAGGTGGGAGAGCTTGTCTCATA	60.268	0.478261	131
isoform_134805_13410_3	CTCTCTCTCTCTCT	CT(2*7)	386	14	ATTACACACAGAGAAGGTGCTGGTGTATGAGGTGAGAG[CTCTCTCTCTCTCT]GCAGAGTCAATATTGGCGATAGGGGCGAGTTTGCGGCCAAGTGCAAGGCCGCATGCTTCTCTATGAGACAAGCTCTCCCACCTAGCTACATT	ATTACACACAGAGAAGGTGCTGG	60.594	0.478261	AATGTAGCTAGGTGGGAGAGCTT	59.83	0.478261	144
isoform_134805_13410_4	CTCTCTCTCTCTCT	CT(2*7)	386	14	ATTACACACAGAGAAGGTGCTGGTGTATGAGGTGAGAG[CTCTCTCTCTCTCT]GCAGAGTCAATATTGGCGATAGGGGCGAGTTTGCGGCCAAGTGCAAGGCCGCATGCTTCTCTATGAGACAAGCTCTCCCACCTA	ATTACACACAGAGAAGGTGCTGG	60.594	0.478261	TAGGTGGGAGAGCTTGTCTCATA	60.268	0.478261	136
isoform_134805_13410_5	CTCTCTCTCTCTCT	CT(2*7)	386	14	ACACAGAGAAGGTGCTGGTGTATGAGGTGAGAG[CTCTCTCTCTCTCT]GCAGAGTCAATATTGGCGATAGGGGCGAGTTTGCGGCCAAGTGCAAGGCCGCATGCTTCTCTATGAGACAAGCTCTCCCACCTAGCTAC	ACACAGAGAAGGTGCTGGTGTAT	60.11	0.478261	GTAGCTAGGTGGGAGAGCTTGTC	60.793	0.565217	136
isoform_134866_13414_1	GACGACGACGACGACGAC	GAC(3*6)	823	18	CGGAGCAGTACTCACCACTATGATTTTGTAGACCAGGGTCAT[GACGACGACGACGACGAC]GATGACAGTGATGCGTGATTTTTTAAGTTCAGGTAATCCTTCTTCACAGGTG	CGGAGCAGTACTCACCACTATG	59.819	0.545455	CACCTGTGAAGAAGGATTACCTG	60.04	0.478261	112
isoform_134866_13414_2	GACGACGACGACGACGAC	GAC(3*6)	823	18	CGGAGCAGTACTCACCACTATGATTTTGTAGACCAGGGTCAT[GACGACGACGACGACGAC]GATGACAGTGATGCGTGATTTTTTAAGTTCAGGTAATCCTTCTTCACAGGTGCTAGTTTTTCATTGTCTGTGTCGAATTAGTGGTTCC	CGGAGCAGTACTCACCACTATG	59.819	0.545455	GGAACCACTAATTCGACACAGAC	59.921	0.478261	148
isoform_134866_13414_3	GACGACGACGACGACGAC	GAC(3*6)	823	18	CGGAGCAGTACTCACCACTATGATTTTGTAGACCAGGGTCAT[GACGACGACGACGACGAC]GATGACAGTGATGCGTGATTTTTTAAGTTCAGGTAATCCTTCTTCACAGG	CGGAGCAGTACTCACCACTATG	59.819	0.545455	CCTGTGAAGAAGGATTACCTGAA	59.64	0.434783	110
isoform_134866_13414_4	GACGACGACGACGACGAC	GAC(3*6)	823	18	AGCGGAGCAGTACTCACCACTATGATTTTGTAGACCAGGGTCAT[GACGACGACGACGACGAC]GATGACAGTGATGCGTGATTTTTTAAGTTCAGGTAATCCTTCTTCACAGGTG	AGCGGAGCAGTACTCACCACTAT	61.56	0.521739	CACCTGTGAAGAAGGATTACCTG	60.04	0.478261	114
isoform_134866_13414_5	GACGACGACGACGACGAC	GAC(3*6)	823	18	CGGAGCAGTACTCACCACTATGATTTTGTAGACCAGGGTCAT[GACGACGACGACGACGAC]GATGACAGTGATGCGTGATTTTTTAAGTTCAGGTAATCCTTCTTCACAGGTGCTAGTTTTTCATTGTCTGTGTCGAATTAGTGG	CGGAGCAGTACTCACCACTATG	59.819	0.545455	CCACTAATTCGACACAGACAATG	59.548	0.434783	144
isoform_134897_13417_1	CTCTCTCTCTCTCTCTCT	CT(2*9)	1056	18	ACACTGTAAGCCTACCTGTCAGCAATTGCTTTTTTAACTTAGTAAGTACTATTGTTCTTGTGA[CTCTCTCTCTCTCTCTCT]AGAATCTTAAGAAAAGCCAAAAAAGAGTGCTAGTAGAGATGCATCCATCCCCAAGCGAAAGAGTATGAAAATG	ACACTGTAAGCCTACCTGTCAGC	59.888	0.521739	CATTTTCATACTCTTTCGCTTGG	60.134	0.391304	154
isoform_134897_13417_2	CTCTCTCTCTCTCTCTCT	CT(2*9)	1056	18	ACACTGTAAGCCTACCTGTCAGCAATTGCTTTTTTAACTTAGTAAGTACTATTGTTCTTGTGA[CTCTCTCTCTCTCTCTCT]AGAATCTTAAGAAAAGCCAAAAAAGAGTGCTAGTAGAGATGCATCCATCCCCAAGCGAAAGAGTATGAAAATGG	ACACTGTAAGCCTACCTGTCAGC	59.888	0.521739	CCATTTTCATACTCTTTCGCTTG	60.134	0.391304	155
isoform_134897_13417_3	CTCTCTCTCTCTCTCTCT	CT(2*9)	1056	18	ACACTGTAAGCCTACCTGTCAGCAATTGCTTTTTTAACTTAGTAAGTACTATTGTTCTTGTGA[CTCTCTCTCTCTCTCTCT]AGAATCTTAAGAAAAGCCAAAAAAGAGTGCTAGTAGAGATGCATCCATCCCCAAGCGAAAGAGTATGAAAATGGCCATG	ACACTGTAAGCCTACCTGTCAGC	59.888	0.521739	CATGGCCATTTTCATACTCTTTC	59.857	0.391304	160
isoform_134897_13417_4	CTCTCTCTCTCTCTCTCT	CT(2*9)	1056	18	CTGTAAGCCTACCTGTCAGCAATTGCTTTTTTAACTTAGTAAGTACTATTGTTCTTGTGA[CTCTCTCTCTCTCTCTCT]AGAATCTTAAGAAAAGCCAAAAAAGAGTGCTAGTAGAGATGCATCCATCCCCAAGCGAAAGAGTATGAAAATG	CTGTAAGCCTACCTGTCAGCAAT	59.854	0.478261	CATTTTCATACTCTTTCGCTTGG	60.134	0.391304	151
isoform_134897_13417_5	CTCTCTCTCTCTCTCTCT	CT(2*9)	1056	18	CTGTAAGCCTACCTGTCAGCAATTGCTTTTTTAACTTAGTAAGTACTATTGTTCTTGTGA[CTCTCTCTCTCTCTCTCT]AGAATCTTAAGAAAAGCCAAAAAAGAGTGCTAGTAGAGATGCATCCATCCCCAAGCGAAAGAGTATGAAAATGG	CTGTAAGCCTACCTGTCAGCAAT	59.854	0.478261	CCATTTTCATACTCTTTCGCTTG	60.134	0.391304	152
isoform_134935_13425_3	GAGAGAGAGAGAGAGAGAGAGA	GA(2*11)	590	22	AAAAGCCTGGTAGTACTCTGCGTTGATACCACTGCTTACTAGTAAGCAGTGGTATCAACGCAGAGTACGGGGGAGTGAGAGAGGGAGCCTGCGTCGCCT[GAGAGAGAGAGAGAGAGAGAGA]GCGGTCGAAGATGTCGAAGCAGCAGCATGCTATAGTGT	AAAAGCCTGGTAGTACTCTGCGT	60.696	0.478261	ACACTATAGCATGCTGCTGCTTC	60.956	0.478261	159
isoform_134957_13429_1	CTCTCTCTCTCTCTCTCTCTCTCTCTCTCTCTCTCTCTCTCTCTCTCTCT	CT(2*25)	161	50	TATATCACTTTTGCCCATTCAGCCATCTCC[CTCTCTCTCTCTCTCTCTCTCTCTCTCTCTCTCTCTCTCTCTCTCTCTCT]ACATATCCACACATACACAAGCTCAACAT	TATATCACTTTTGCCCATTCAGC	60.338	0.391304	ATGTTGAGCTTGTGTATGTGTGG	59.972	0.434783	109
isoform_134957_13429_2	CTCTCTCTCTCTCTCTCTCTCTCTCTCTCTCTCTCTCTCTCTCTCTCTCT	CT(2*25)	161	50	GCTTCATATATCACTTTTGCCCATTCAGCCATCTCC[CTCTCTCTCTCTCTCTCTCTCTCTCTCTCTCTCTCTCTCTCTCTCTCTCT]ACATATCCACACATACACAAGCTCAACAT	GCTTCATATATCACTTTTGCCCA	60.338	0.391304	ATGTTGAGCTTGTGTATGTGTGG	59.972	0.434783	115
isoform_134957_13429_3	CTCTCTCTCTCTCTCTCTCTCTCTCTCTCTCTCTCTCTCTCTCTCTCTCT	CT(2*25)	161	50	TATATCACTTTTGCCCATTCAGCCATCTCC[CTCTCTCTCTCTCTCTCTCTCTCTCTCTCTCTCTCTCTCTCTCTCTCTCT]ACATATCCACACATACACAAGCTCAACATACACCCAAAT	TATATCACTTTTGCCCATTCAGC	60.338	0.391304	ATTTGGGTGTATGTTGAGCTTGT	59.818	0.391304	119
isoform_134957_13429_4	CTCTCTCTCTCTCTCTCTCTCTCTCTCTCTCTCTCTCTCTCTCTCTCTCT	CT(2*25)	161	50	GCTTCATATATCACTTTTGCCCATTCAGCCATCTCC[CTCTCTCTCTCTCTCTCTCTCTCTCTCTCTCTCTCTCTCTCTCTCTCTCT]ACATATCCACACATACACAAGCTCAACATACACCCAAAT	GCTTCATATATCACTTTTGCCCA	60.338	0.391304	ATTTGGGTGTATGTTGAGCTTGT	59.818	0.391304	125
isoform_134957_13429_5	CTCTCTCTCTCTCTCTCTCTCTCTCTCTCTCTCTCTCTCTCTCTCTCTCT	CT(2*25)	161	50	TATATCACTTTTGCCCATTCAGCCATCTCC[CTCTCTCTCTCTCTCTCTCTCTCTCTCTCTCTCTCTCTCTCTCTCTCTCT]ACATATCCACACATACACAAGCTCAACATACACCCA	TATATCACTTTTGCCCATTCAGC	60.338	0.391304	TGGGTGTATGTTGAGCTTGTGTA	60.467	0.434783	116
isoform_135052_13550_2	CTCTCTCTCTCTCTCTCTCTCTCTCTCTCT	CT(2*15)	166	30	CAGCAAAGATTGCTCCATAATTTGCAGATCTCTCTCACACTCTCATAGGTCATATAATAATATATTTCTCTGTACCAAAAAATCA[CTCTCTCTCTCTCTCTCTCTCTCTCTCTCT]CGCCTTTAGGAACTCCCTAATCATATCGACATTTGGGTTGTC	CAGCAAAGATTGCTCCATAATTT	59.657	0.347826	GACAACCCAAATGTCGATATGAT	59.965	0.391304	157
isoform_135052_13550_4	CTCTCTCTCTCTCTCTCTCTCTCTCTCTCT	CT(2*15)	166	30	GCTCCATAATTTGCAGATCTCTCTCACACTCTCATAGGTCATATAATAATATATTTCTCTGTACCAAAAAATCA[CTCTCTCTCTCTCTCTCTCTCTCTCTCTCT]CGCCTTTAGGAACTCCCTAATCATATCGACATTTGGGTTGTC	GCTCCATAATTTGCAGATCTCTC	59.372	0.434783	GACAACCCAAATGTCGATATGAT	59.965	0.391304	146
isoform_135052_13550_5	CTCTCTCTCTCTCTCTCTCTCTCTCTCTCT	CT(2*15)	166	30	GCTCCATAATTTGCAGATCTCTCTCACACTCTCATAGGTCATATAATAATATATTTCTCTGTACCAAAAAATCA[CTCTCTCTCTCTCTCTCTCTCTCTCTCTCT]CGCCTTTAGGAACTCCCTAATCATATCGACATTTGG	GCTCCATAATTTGCAGATCTCTC	59.372	0.434783	CCAAATGTCGATATGATTAGGGA	60.049	0.391304	140
isoform_135082_13554_1	GATGAGGATGAGGATGAGGATGAG	GATGAG(6*4)	676	24	GTAAGGGTGCAAAGGAGAAGAGTGCTGAGGATGATGAGGAAGGGGACAGC[GATGAGGATGAGGATGAGGATGAG]GACGAAGAGGACAGTGATGAGGATGATGAGGAGAATGATGGCATTAGGAAGTGA	GTAAGGGTGCAAAGGAGAAGAGT	60.175	0.478261	TCACTTCCTAATGCCATCATTCT	59.979	0.391304	128
isoform_135142_13565_1	TCTCTCTCTCTCTC	TC(2*7)	1028	14	TGATCTCATAGGTTTATTGGCCTTTTGAGGACGTTAATATAAAATTTCATTTCATTTTG[TCTCTCTCTCTCTC]TTCCCCCCCCGCGCCTTTTGGGGTCATTTTGACCTTTTGAAGACGT	TGATCTCATAGGTTTATTGGCCT	59.029	0.391304	ACGTCTTCAAAAGGTCAAAATGA	60.028	0.347826	119
isoform_135142_13565_2	TCTCTCTCTCTCTC	TC(2*7)	1028	14	TTGATCTCATAGGTTTATTGGCCTTTTGAGGACGTTAATATAAAATTTCATTTCATTTTG[TCTCTCTCTCTCTC]TTCCCCCCCCGCGCCTTTTGGGGTCATTTTGACCTTTTGAAGACGT	TTGATCTCATAGGTTTATTGGCCT	60.214	0.375	ACGTCTTCAAAAGGTCAAAATGA	60.028	0.347826	120
isoform_135142_13565_3	TCTCTCTCTCTCTC	TC(2*7)	1028	14	TGATCTCATAGGTTTATTGGCCTTTTGAGGACGTTAATATAAAATTTCATTTCATTTTG[TCTCTCTCTCTCTC]TTCCCCCCCCGCGCCTTTTGGGGTCATTTTGACCTTTTGAAGACGTT	TGATCTCATAGGTTTATTGGCCT	59.029	0.391304	AACGTCTTCAAAAGGTCAAAATG	59.569	0.347826	120
isoform_135142_13565_4	TCTCTCTCTCTCTC	TC(2*7)	1028	14	TTGATCTCATAGGTTTATTGGCCTTTTGAGGACGTTAATATAAAATTTCATTTCATTTTG[TCTCTCTCTCTCTC]TTCCCCCCCCGCGCCTTTTGGGGTCATTTTGACCTTTTGAAGACGTT	TTGATCTCATAGGTTTATTGGCCT	60.214	0.375	AACGTCTTCAAAAGGTCAAAATG	59.569	0.347826	121
isoform_135142_13566_1	TCTCTCTCTCTCTCTCTCTCTCTCTC	TC(2*13)	1103	26	GTCATTTTGACCTTTTGAAGACGTTCTTATAACATTTCA[TCTCTCTCTCTCTCTCTCTCTCTCTC]TGGTAATGTTTGTTTGATTAGATCAAATCAAAGATAAGTGGAAATAACAAGTAGGCAACATAGCCTACTTATGAGGC	GTCATTTTGACCTTTTGAAGACG	60.028	0.391304	GCCTCATAAGTAGGCTATGTTGC	59.348	0.478261	142
isoform_135142_13566_2	TCTCTCTCTCTCTCTCTCTCTCTCTC	TC(2*13)	1103	26	CATTTTGACCTTTTGAAGACGTTCTTATAACATTTCA[TCTCTCTCTCTCTCTCTCTCTCTCTC]TGGTAATGTTTGTTTGATTAGATCAAATCAAAGATAAGTGGAAATAACAAGTAGGCAACATAGCCTACTTATGAGGC	CATTTTGACCTTTTGAAGACGTT	59.569	0.347826	GCCTCATAAGTAGGCTATGTTGC	59.348	0.478261	140
isoform_135142_13566_3	TCTCTCTCTCTCTCTCTCTCTCTCTC	TC(2*13)	1103	26	GTCATTTTGACCTTTTGAAGACGTTCTTATAACATTTCA[TCTCTCTCTCTCTCTCTCTCTCTCTC]TGGTAATGTTTGTTTGATTAGATCAAATCAAAGATAAGTGGAAATAACAAGTAGGCAACATAGCCTACTTATGAGGCA	GTCATTTTGACCTTTTGAAGACG	60.028	0.391304	TGCCTCATAAGTAGGCTATGTTG	58.492	0.434783	143
isoform_135142_13566_4	TCTCTCTCTCTCTCTCTCTCTCTCTC	TC(2*13)	1103	26	GGTCATTTTGACCTTTTGAAGACGTTCTTATAACATTTCA[TCTCTCTCTCTCTCTCTCTCTCTCTC]TGGTAATGTTTGTTTGATTAGATCAAATCAAAGATAAGTGGAAATAACAAGTAGGCAACATAGCCTACTTATGAGGC	GGTCATTTTGACCTTTTGAAGAC	59.036	0.391304	GCCTCATAAGTAGGCTATGTTGC	59.348	0.478261	143
isoform_135142_13566_5	TCTCTCTCTCTCTCTCTCTCTCTCTC	TC(2*13)	1103	26	GTCATTTTGACCTTTTGAAGACGTTCTTATAACATTTCA[TCTCTCTCTCTCTCTCTCTCTCTCTC]TGGTAATGTTTGTTTGATTAGATCAAATCAAAGATAAGTGGAAATAACAAGTAGGCAACA	GTCATTTTGACCTTTTGAAGACG	60.028	0.391304	TGTTGCCTACTTGTTATTTCCAC	58.249	0.391304	125
isoform_135151_13567_1	CTCTCTCTCTCTCTCTCTCTCTCTCTCTCTCT	CT(2*16)	1127	32	AAATGTTTTTGAAGGGGACATTTCAAATGTCTCAAGGTAAC[CTCTCTCTCTCTCTCTCTCTCTCTCTCTCTCT]AAAATTTTATTGGGCTTAAAGCTCAAGCTTTCCATTAAAGCTTGGGAAAA	AAATGTTTTTGAAGGGGACATTT	59.982	0.304348	TTTTCCCAAGCTTTAATGGAAA	59.948	0.318182	123
isoform_135151_13567_2	CTCTCTCTCTCTCTCTCTCTCTCTCTCTCTCT	CT(2*16)	1127	32	AAATGTTTTTGAAGGGGACATTTCAAATGTCTCAAGGTAAC[CTCTCTCTCTCTCTCTCTCTCTCTCTCTCTCT]AAAATTTTATTGGGCTTAAAGCTCAAGCTTTCCATTAAAGCTTGGGAAAAA	AAATGTTTTTGAAGGGGACATTT	59.982	0.304348	TTTTTCCCAAGCTTTAATGGAA	59.948	0.318182	124
isoform_135151_13567_3	CTCTCTCTCTCTCTCTCTCTCTCTCTCTCTCT	CT(2*16)	1127	32	AAATGTTTTTGAAGGGGACATTTCAAATGTCTCAAGGTAAC[CTCTCTCTCTCTCTCTCTCTCTCTCTCTCTCT]AAAATTTTATTGGGCTTAAAGCTCAAGCTTTCCATTAAAGCTTGGGAAAAA	AAATGTTTTTGAAGGGGACATTT	59.982	0.304348	TTTTTCCCAAGCTTTAATGGAAA	61.059	0.304348	124
isoform_135151_13567_4	CTCTCTCTCTCTCTCTCTCTCTCTCTCTCTCT	CT(2*16)	1127	32	TCGTACATCTGACCTGCTTATGATCATGGAAGTATAAATGTTTTTGAAGGGGACATTTCAAATGTCTCAAGGTAAC[CTCTCTCTCTCTCTCTCTCTCTCTCTCTCTCT]AAAATTTTATTGGGCTTAAAGCTCAAGCTTTCCATTAAAGCTTGGGAAAA	TCGTACATCTGACCTGCTTATGA	59.783	0.434783	TTTTCCCAAGCTTTAATGGAAA	59.948	0.318182	158
isoform_135151_13567_5	CTCTCTCTCTCTCTCTCTCTCTCTCTCTCTCT	CT(2*16)	1127	32	TCGTACATCTGACCTGCTTATGATCATGGAAGTATAAATGTTTTTGAAGGGGACATTTCAAATGTCTCAAGGTAAC[CTCTCTCTCTCTCTCTCTCTCTCTCTCTCTCT]AAAATTTTATTGGGCTTAAAGCTCAAGCTTTCCATTAAAGCTTGGGAAAAA	TCGTACATCTGACCTGCTTATGA	59.783	0.434783	TTTTTCCCAAGCTTTAATGGAA	59.948	0.318182	159
isoform_135169_13568_1	CGCGCGCGCGCG	CG(2*6)	194	12	CAAAAGAAACTCACAGACGAGCGCAGAGATGTACATCGAGCTCGACTCTCAAAGGCGGCCGGCCCCCGCCCACGTCGGTTCTGCTCTCTCACGACACGCCCAACGATACGGCACC[CGCGCGCGCGCG]GATACCAGGAAGAGGTGCTTCAGTTCTA	CAAAAGAAACTCACAGACGAGC	59.169	0.454545	TAGAACTGAAGCACCTCTTCCTG	60.061	0.478261	155
isoform_135169_13568_2	CGCGCGCGCGCG	CG(2*6)	194	12	AAAAGAAACTCACAGACGAGCGCAGAGATGTACATCGAGCTCGACTCTCAAAGGCGGCCGGCCCCCGCCCACGTCGGTTCTGCTCTCTCACGACACGCCCAACGATACGGCACC[CGCGCGCGCGCG]GATACCAGGAAGAGGTGCTTCAGTTCTA	AAAAGAAACTCACAGACGAGCG	60.95	0.454545	TAGAACTGAAGCACCTCTTCCTG	60.061	0.478261	154
isoform_135169_13568_3	CGCGCGCGCGCG	CG(2*6)	194	12	GGTTCTGCTCTCTCACGACACGCCCAACGATACGGCACC[CGCGCGCGCGCG]GATACCAGGAAGAGGTGCTTCAGTTCTATACGACGCTCATCTCGAGAGAAAAGGGTTGCACGGCAGGGCGTTTGCGCTATTTTCGGCCAGTCGAGAGTTTGTACGTCTT	GGTTCTGCTCTCTCACGACAC	60.049	0.571429	AAGACGTACAAACTCTCGACTGG	59.861	0.478261	160
isoform_135169_13568_4	CGCGCGCGCGCG	CG(2*6)	194	12	CCCAAAAGAAACTCACAGACGAGCGCAGAGATGTACATCGAGCTCGACTCTCAAAGGCGGCCGGCCCCCGCCCACGTCGGTTCTGCTCTCTCACGACACGCCCAACGATACGGCACC[CGCGCGCGCGCG]GATACCAGGAAGAGGTGCTTCAGTTCTA	CCCAAAAGAAACTCACAGACG	59.76	0.47619	TAGAACTGAAGCACCTCTTCCTG	60.061	0.478261	157
isoform_135169_13568_5	CGCGCGCGCGCG	CG(2*6)	194	12	CAAAAGAAACTCACAGACGAGCGCAGAGATGTACATCGAGCTCGACTCTCAAAGGCGGCCGGCCCCCGCCCACGTCGGTTCTGCTCTCTCACGACACGCCCAACGATACGGCACC[CGCGCGCGCGCG]GATACCAGGAAGAGGTGCTTCAGT	CAAAAGAAACTCACAGACGAGC	59.169	0.454545	ACTGAAGCACCTCTTCCTGGTAT	60.541	0.478261	151
isoform_13517_2663_2	GAGAGAGAGAGAGAGAGAGAGAGAGAGA	GA(2*14)	167	28	ACTCTGTCACGTGTGCGAAATAAGGGCTGCTGCATGCATGAGCTTAGGCGGGGGG[GAGAGAGAGAGAGAGAGAGAGAGAGAGA]GCGCTTCTGGTACAATCTATAGCTG	ACTCTGTCACGTGTGCGAAATA	60.751	0.454545	CAGCTATAGATTGTACCAGAAGCG	59.515	0.458333	108
isoform_135181_13574_5	GAGGAGGAGGAGGAG	GAG(3*5)	526	15	AAGAAGAAGACGCCTATGATGGTGACGCCGACGCCGAAGAA[GAGGAGGAGGAGGAG]GAAGAAGCACCACAATTGCGACAAAATTGCTCACGCAACCACCCACAAAATGAGGCCACAGTGCAAGCCTCTTTCAAGCCTAATAGGA	AAGAAGAAGACGCCTATGATGGT	60.498	0.434783	TCCTATTAGGCTTGAAAGAGGCT	59.9	0.434783	144
isoform_135218_13578_4	AGAGAGAGAGAG	AG(2*6)	524	12	AGGTATAAAGGTCTCCATAGCCGTAACTGCAAGTCTTTGGGTTTTCTTCGAAAGCTGGGAGTTATGGCTATGGAGTGTTCTTCCTCATGAGATATGAGCACTTAGCAGAGAGGT[AGAGAGAGAGAG]ACAGTGTTAAGAGGAAGTGAGTTATGGCAATG	AGGTATAAAGGTCTCCATAGCCG	59.9	0.478261	CATTGCCATAACTCACTTCCTCT	59.666	0.434783	158
isoform_135363_13605_4	CCCCCCCCCCCCCCCCCCCC	C(1*20)	364	20	CTTCTCTTGTATAACCCTCCGCTCTGCCGCCTCTCCTCGCCCCTAAATACAAGCAGGCGGCAACACCCTTCGCTTCTTGCAGAGGAAGGGAGACGGACGCAAAACACCCCCCCCCCCCCCCCCCCC[TCTTCTTCTTCTTCT]TTTTCGCCACGTAC	CTTCTCTTGTATAACCCTCCGCT	60.153	0.478261	GTACGTGGCGAAAAAGAAGAAG	60.288	0.454545	155
isoform_135363_13606_1	TCTTCTTCTTCTTCT	TCT(3*5)	384	15	CTCCTCGCCCCTAAATACAAGCAGGCGGCAACACCCTTCGCTTCTTGCAGAGGAAGGGAGACGGACGCAAAACACCCCCCCCCCCCCCCCCCCC[TCTTCTTCTTCTTCT]TTTTCGCCACGTACCTCCCTCTGTCTCTCTTTCCTTTT	CTCCTCGCCCCTAAATACAAG	60.095	0.52381	AAAAGGAAAGAGAGACAGAGGGA	59.882	0.434783	147
isoform_135363_13606_2	TCTTCTTCTTCTTCT	TCT(3*5)	384	15	CTCCTCGCCCCTAAATACAAGCAGGCGGCAACACCCTTCGCTTCTTGCAGAGGAAGGGAGACGGACGCAAAACACCCCCCCCCCCCCCCCCCCC[TCTTCTTCTTCTTCT]TTTTCGCCACGTACCTCCCTCTGTCTCTCTTTCC	CTCCTCGCCCCTAAATACAAG	60.095	0.52381	GGAAAGAGAGACAGAGGGAGGTA	60.246	0.521739	143
isoform_135363_13606_3	TCTTCTTCTTCTTCT	TCT(3*5)	384	15	CTCCTCGCCCCTAAATACAAGCAGGCGGCAACACCCTTCGCTTCTTGCAGAGGAAGGGAGACGGACGCAAAACACCCCCCCCCCCCCCCCCCCC[TCTTCTTCTTCTTCT]TTTTCGCCACGTACCTCCCTCTGTCTCTCTTT	CTCCTCGCCCCTAAATACAAG	60.095	0.52381	AAAGAGAGACAGAGGGAGGTACG	60.299	0.521739	141
isoform_135363_13606_4	TCTTCTTCTTCTTCT	TCT(3*5)	384	15	CTCCTCGCCCCTAAATACAAGCAGGCGGCAACACCCTTCGCTTCTTGCAGAGGAAGGGAGACGGACGCAAAACACCCCCCCCCCCCCCCCCCCC[TCTTCTTCTTCTTCT]TTTTCGCCACGTACCTCCCTCTGTCTCTCTTTCCTTT	CTCCTCGCCCCTAAATACAAG	60.095	0.52381	AAAGGAAAGAGAGACAGAGGGAG	59.537	0.478261	146
isoform_135363_13606_5	TCTTCTTCTTCTTCT	TCT(3*5)	384	15	CTCTCCTCGCCCCTAAATACAAGCAGGCGGCAACACCCTTCGCTTCTTGCAGAGGAAGGGAGACGGACGCAAAACACCCCCCCCCCCCCCCCCCCC[TCTTCTTCTTCTTCT]TTTTCGCCACGTACCTCCCTCTGTCTCTCTTTCCTTTT	CTCTCCTCGCCCCTAAATACAAG	62.494	0.521739	AAAAGGAAAGAGAGACAGAGGGA	59.882	0.434783	149
isoform_135368_13607_2	ACACACACACACACAC	AC(2*8)	194	16	AGACCAAACACCCACAAACATACGCGCCAGATACCTGCGCGCAGCGCGCGCACG[ACACACACACACACAC]GCAGAGGCAGTGACACAGCCAGAATTGCGATGCCGGTGCCCAGCAGTCGCGCTCCCCCATTATATCCCCGACAACCCC	AGACCAAACACCCACAAACATAC	60.068	0.434783	GGGGTTGTCGGGGATATAAT	59.74	0.5	148
isoform_135430_13616_1	ACACACACACACAC	AC(2*7)	1256	14	CAAAGGTAAATCTGGGCTTATCCTAGATTCATCTAGGTACATACAAAGATTGCTCTCTTTTTATGTCTTTACACAGCAAT[ACACACACACACAC]ATATAAAGATTGCTCTCTTTTTATGTCTTTACACAGCAATAGGGGTTGTT	CAAAGGTAAATCTGGGCTTATCC	60.202	0.434783	AACAACCCCTATTGCTGTGTAAA	59.821	0.391304	144
isoform_135430_13616_2	ACACACACACACAC	AC(2*7)	1256	14	CAAAGGTAAATCTGGGCTTATCCTAGATTCATCTAGGTACATACAAAGATTGCTCTCTTTTTATGTCTTTACACAGCAAT[ACACACACACACAC]ATATAAAGATTGCTCTCTTTTTATGTCTTTACACAGCAATAGGGGTTGTTT	CAAAGGTAAATCTGGGCTTATCC	60.202	0.434783	AAACAACCCCTATTGCTGTGTAA	59.821	0.391304	145
isoform_135430_13616_3	ACACACACACACAC	AC(2*7)	1256	14	CAAAGGTAAATCTGGGCTTATCCTAGATTCATCTAGGTACATACAAAGATTGCTCTCTTTTTATGTCTTTACACAGCAAT[ACACACACACACAC]ATATAAAGATTGCTCTCTTTTTATGTCTTTACACAGCAATAGGGGTTGTTTT	CAAAGGTAAATCTGGGCTTATCC	60.202	0.434783	AAAACAACCCCTATTGCTGTGTA	59.821	0.391304	146
isoform_135430_13616_4	ACACACACACACAC	AC(2*7)	1256	14	CAAAGGTAAATCTGGGCTTATCCTAGATTCATCTAGGTACATACAAAGATTGCTCTCTTTTTATGTCTTTACACAGCAAT[ACACACACACACAC]ATATAAAGATTGCTCTCTTTTTATGTCTTTACACAGCAATAGGGGTTGTTTTCTT	CAAAGGTAAATCTGGGCTTATCC	60.202	0.434783	AAGAAAACAACCCCTATTGCTGT	60.274	0.391304	149
isoform_135430_13616_5	ACACACACACACAC	AC(2*7)	1256	14	CAAAGGTAAATCTGGGCTTATCCTAGATTCATCTAGGTACATACAAAGATTGCTCTCTTTTTATGTCTTTACACAGCAAT[ACACACACACACAC]ATATAAAGATTGCTCTCTTTTTATGTCTTTACACAGCAATAGGGGTTG	CAAAGGTAAATCTGGGCTTATCC	60.202	0.434783	CAACCCCTATTGCTGTGTAAAGA	60.4	0.434783	142
isoform_135441_13620_1	TCTCTCTCTCTCTCTCTCTCTCTCTC	TC(2*13)	601	26	AGCTCATCATAGTGGTCATCCTCGCCCCCCCTTATTGCTGATTTGGGTATGCATCCA[TCTCTCTCTCTCTCTCTCTCTCTCTC]TATCACTTTCTCTCTCTGCAGGTGCAAGGGACTGCCATCGAGATTCCACTCCACAGTGGTCTAG	AGCTCATCATAGTGGTCATCCTC	59.618	0.478261	CTAGACCACTGTGGAGTGGAATC	60.045	0.521739	147
isoform_135441_13623_1	CTCTCTCTCTCTCTCTCT	CT(2*9)	1297	18	GTTACACACAACAGATCGCAAGATCTTTGTCACTATGATCGCG[CTCTCTCTCTCTCTCTCT]AAGACAGCGTATGACGACCCGACTCATAAGCTTCCTTAC	GTTACACACAACAGATCGCAAGA	60.225	0.434783	GTAAGGAAGCTTATGAGTCGGGT	60.037	0.478261	100
isoform_135441_13623_2	CTCTCTCTCTCTCTCTCT	CT(2*9)	1297	18	GAGGTTCTCTGCAATCACTTCATGGTTACACACAACAGATCGCAAGATCTTTGTCACTATGATCGCG[CTCTCTCTCTCTCTCTCT]AAGACAGCGTATGACGACCCGACTCATAAGCTTCCTTAC	GAGGTTCTCTGCAATCACTTCAT	59.771	0.434783	GTAAGGAAGCTTATGAGTCGGGT	60.037	0.478261	124
isoform_135441_13623_3	CTCTCTCTCTCTCTCTCT	CT(2*9)	1297	18	TCTCTGCAATCACTTCATGGTTACACACAACAGATCGCAAGATCTTTGTCACTATGATCGCG[CTCTCTCTCTCTCTCTCT]AAGACAGCGTATGACGACCCGACTCATAAGCTTCCTTAC	TCTCTGCAATCACTTCATGGTTA	59.761	0.391304	GTAAGGAAGCTTATGAGTCGGGT	60.037	0.478261	119
isoform_135441_13623_4	CTCTCTCTCTCTCTCTCT	CT(2*9)	1297	18	TTACACACAACAGATCGCAAGATCTTTGTCACTATGATCGCG[CTCTCTCTCTCTCTCTCT]AAGACAGCGTATGACGACCCGACTCATAAGCTTCCTTAC	TTACACACAACAGATCGCAAGAT	59.691	0.391304	GTAAGGAAGCTTATGAGTCGGGT	60.037	0.478261	99
isoform_135452_13628_1	GAGAGAGAGAGAGAGAGAGAGAGAGAGAGAGAGAGAGAGAGAGAGAGAGAGAGAGAGAGAGAGAGAGAGAGAGAGAGAGAGAGA	GA(2*42)	975	84	AGGTGACCCGAATCCTCT[GAGAGAGAGAGAGAGAGAGAGAGAGAGAGAGAGAGAGAGAGAGAGAGAGAGAGAGAGAGAGAGAGAGAGAGAGAGAGAGAGAGA]TAATATTCACCACTTAATCGAGGACTTAATGTTATGTGCG	AGGTGACCCGAATCCTCTG	60.056	0.578947	CGCACATAACATTAAGTCCTCG	59.669	0.454545	142
isoform_135452_13628_2	GAGAGAGAGAGAGAGAGAGAGAGAGAGAGAGAGAGAGAGAGAGAGAGAGAGAGAGAGAGAGAGAGAGAGAGAGAGAGAGAGAGA	GA(2*42)	975	84	AAGGTGACCCGAATCCTCT[GAGAGAGAGAGAGAGAGAGAGAGAGAGAGAGAGAGAGAGAGAGAGAGAGAGAGAGAGAGAGAGAGAGAGAGAGAGAGAGAGAGA]TAATATTCACCACTTAATCGAGGACTTAATGTTATGTGCG	AAGGTGACCCGAATCCTCTG	61.417	0.55	CGCACATAACATTAAGTCCTCG	59.669	0.454545	143
isoform_135452_13628_3	GAGAGAGAGAGAGAGAGAGAGAGAGAGAGAGAGAGAGAGAGAGAGAGAGAGAGAGAGAGAGAGAGAGAGAGAGAGAGAGAGAGA	GA(2*42)	975	84	CAAGGTGACCCGAATCCTCT[GAGAGAGAGAGAGAGAGAGAGAGAGAGAGAGAGAGAGAGAGAGAGAGAGAGAGAGAGAGAGAGAGAGAGAGAGAGAGAGAGAGA]TAATATTCACCACTTAATCGAGGACTTAATGTTATGTGCG	CAAGGTGACCCGAATCCTCT	61.417	0.55	CGCACATAACATTAAGTCCTCG	59.669	0.454545	144
isoform_135452_13628_4	GAGAGAGAGAGAGAGAGAGAGAGAGAGAGAGAGAGAGAGAGAGAGAGAGAGAGAGAGAGAGAGAGAGAGAGAGAGAGAGAGAGA	GA(2*42)	975	84	CAAGGTGACCCGAATCCTCT[GAGAGAGAGAGAGAGAGAGAGAGAGAGAGAGAGAGAGAGAGAGAGAGAGAGAGAGAGAGAGAGAGAGAGAGAGAGAGAGAGAGA]TAATATTCACCACTTAATCGAGGACTTAATGTTATGTGCG	CAAGGTGACCCGAATCCTC	60.459	0.578947	CGCACATAACATTAAGTCCTCG	59.669	0.454545	144
isoform_135452_13628_5	GAGAGAGAGAGAGAGAGAGAGAGAGAGAGAGAGAGAGAGAGAGAGAGAGAGAGAGAGAGAGAGAGAGAGAGAGAGAGAGAGAGA	GA(2*42)	975	84	AGGTGACCCGAATCCTCT[GAGAGAGAGAGAGAGAGAGAGAGAGAGAGAGAGAGAGAGAGAGAGAGAGAGAGAGAGAGAGAGAGAGAGAGAGAGAGAGAGAGA]TAATATTCACCACTTAATCGAGGACTT	AGGTGACCCGAATCCTCTG	60.056	0.578947	AAGTCCTCGATTAAGTGGTGAAT	58.224	0.391304	129
isoform_135453_13632_1	GTGTGTGTGTGT	GT(2*6)	3406	12	GGTCATGGTGGTATTATTGAGGATTTTGAGTG[GTGTGTGTGTGT]TTCGGCATGTATCCTCACGTAGGGCGCTCTTTGTATTGATTTTCTTTAGTTCTTGATCTTGCCTTCAGAATAAGGCGCTTGCTTGTCGCAGCAGTTTAATATGAA	GGTCATGGTGGTATTATTGAGGA	59.959	0.434783	TTCATATTAAACTGCTGCGACAA	59.802	0.347826	149
isoform_135453_13632_2	GTGTGTGTGTGT	GT(2*6)	3406	12	GGTCATGGTGGTATTATTGAGGATTTTGAGTG[GTGTGTGTGTGT]TTCGGCATGTATCCTCACGTAGGGCGCTCTTTGTATTGATTTTCTTTAGTTCTTGATCTTGCCTTCAGAATAAGG	GGTCATGGTGGTATTATTGAGGA	59.959	0.434783	CCTTATTCTGAAGGCAAGATCAA	59.745	0.391304	119
isoform_135453_13632_3	GTGTGTGTGTGT	GT(2*6)	3406	12	GGTCATGGTGGTATTATTGAGGATTTTGAGTG[GTGTGTGTGTGT]TTCGGCATGTATCCTCACGTAGGGCGCTCTTTGTATTGATTTTCTTTAGTTCTTGATCTTGCCTTCAGAATAAGGCGCTTGCTTGTCGCAGCAGTTTAATATGA	GGTCATGGTGGTATTATTGAGGA	59.959	0.434783	TCATATTAAACTGCTGCGACAAG	59.459	0.391304	148
isoform_135453_13632_4	GTGTGTGTGTGT	GT(2*6)	3406	12	GGTCATGGTGGTATTATTGAGGATTTTGAGTG[GTGTGTGTGTGT]TTCGGCATGTATCCTCACGTAGGGCGCTCTTTGTATTGATT	GGTCATGGTGGTATTATTGAGGA	59.959	0.434783	AATCAATACAAAGAGCGCCCTAC	60.824	0.434783	85
isoform_135453_13632_5	GTGTGTGTGTGT	GT(2*6)	3406	12	GGTCATGGTGGTATTATTGAGGATTTTGAGTG[GTGTGTGTGTGT]TTCGGCATGTATCCTCACGTAGGGCGCTCTTTGTATTGATTTTCT	GGTCATGGTGGTATTATTGAGGA	59.959	0.434783	AGAAAATCAATACAAAGAGCGCC	60.925	0.391304	89
isoform_135469_13633_1	AGGTGAGGTGAGGTGAGGTG	AGGTG(5*4)	1052	20	GGGTAGCTAGTTTGACAAAGGAAAAGCTTGCCTTGGCTGAGC[AGGTGAGGTGAGGTGAGGTG]ATTAGACTCTTTTTACCTCGAAATACTAATTAATCTTGTATATGAGAATTTAGGATTTTATATAGATTTTAAAACTGATGCGTTTTCTAAAAGAAG	GGGTAGCTAGTTTGACAAAGGAAA	60.058	0.416667	CTTCTTTTAGAAAACGCATCAGT	57.022	0.347826	158
isoform_135469_13633_2	AGGTGAGGTGAGGTGAGGTG	AGGTG(5*4)	1052	20	GGGTAGCTAGTTTGACAAAGGAAAAGCTTGCCTTGGCTGAGC[AGGTGAGGTGAGGTGAGGTG]ATTAGACTCTTTTTACCTCGAAATACTAATTAATCTTGTATATGAGAATTTAGGATTTTATATAGATTTTAAAACTGATGCGTTTTCTAAAAGAAGT	GGGTAGCTAGTTTGACAAAGGAAA	60.058	0.416667	ACTTCTTTTAGAAAACGCATCAG	57.022	0.347826	159
isoform_135469_13633_3	AGGTGAGGTGAGGTGAGGTG	AGGTG(5*4)	1052	20	AGTTTGACAAAGGAAAAGCTTGCCTTGGCTGAGC[AGGTGAGGTGAGGTGAGGTG]ATTAGACTCTTTTTACCTCGAAATACTAATTAATCTTGTATATGAGAATTTAGGATTTTATATAGATTTTAAAACTGATGCGTTTTCTAAAAGAAG	AGTTTGACAAAGGAAAAGCTTGC	61.103	0.391304	CTTCTTTTAGAAAACGCATCAGT	57.022	0.347826	150
isoform_135469_13633_4	AGGTGAGGTGAGGTGAGGTG	AGGTG(5*4)	1052	20	AGTTTGACAAAGGAAAAGCTTGCCTTGGCTGAGC[AGGTGAGGTGAGGTGAGGTG]ATTAGACTCTTTTTACCTCGAAATACTAATTAATCTTGTATATGAGAATTTAGGATTTTATATAGATTTTAAAACTGATGCGTTTTCTAAAAGAAGT	AGTTTGACAAAGGAAAAGCTTGC	61.103	0.391304	ACTTCTTTTAGAAAACGCATCAG	57.022	0.347826	151
isoform_135469_13633_5	AGGTGAGGTGAGGTGAGGTG	AGGTG(5*4)	1052	20	GGGTAGCTAGTTTGACAAAGGAAAAGCTTGCCTTGGCTGAGC[AGGTGAGGTGAGGTGAGGTG]ATTAGACTCTTTTTACCTCGAAATACTAATTAATCTTGTATATGAGAATTTAGGATTTTATATAGATTTTAAAACTGATGCGTTTTCTAAAAGAAG	GGGTAGCTAGTTTGACAAAGGAA	58.877	0.434783	CTTCTTTTAGAAAACGCATCAGT	57.022	0.347826	158
isoform_135483_13636_1	TGTGTGTGTGTG	TG(2*6)	2192	12	CTTCCTAACTCTCTGGCAAGGATTGGCAGATTTTTTGTTAATTAAGCCAA[TGTGTGTGTGTG]TACTTGTCCGCGTGCGTCAAGGTGTATGTTATTCTTCTTCTTTCTAAGAAGCACGTGTACCATCCT	CTTCCTAACTCTCTGGCAAGGAT	60.261	0.478261	AGGATGGTACACGTGCTTCTTAG	59.725	0.478261	128
isoform_135483_13636_2	TGTGTGTGTGTG	TG(2*6)	2192	12	CAATGGTGCTTCCTAACTCTCTGGCAAGGATTGGCAGATTTTTTGTTAATTAAGCCAA[TGTGTGTGTGTG]TACTTGTCCGCGTGCGTCAAGGTGTATGTTATTCTTCTTCTTTCTAAGAAGCACGTGTACCATCCT	CAATGGTGCTTCCTAACTCTCTG	60.301	0.478261	AGGATGGTACACGTGCTTCTTAG	59.725	0.478261	136
isoform_135483_13636_3	TGTGTGTGTGTG	TG(2*6)	2192	12	AATGGTGCTTCCTAACTCTCTGGCAAGGATTGGCAGATTTTTTGTTAATTAAGCCAA[TGTGTGTGTGTG]TACTTGTCCGCGTGCGTCAAGGTGTATGTTATTCTTCTTCTTTCTAAGAAGCACGTGTACCATCCT	AATGGTGCTTCCTAACTCTCTGG	60.995	0.478261	AGGATGGTACACGTGCTTCTTAG	59.725	0.478261	135
isoform_135483_13636_4	TGTGTGTGTGTG	TG(2*6)	2192	12	CTTCCTAACTCTCTGGCAAGGATTGGCAGATTTTTTGTTAATTAAGCCAA[TGTGTGTGTGTG]TACTTGTCCGCGTGCGTCAAGGTGTATGTTATTCTT	CTTCCTAACTCTCTGGCAAGGAT	60.261	0.478261	AAGAATAACATACACCTTGACGCA	59.958	0.375	98
isoform_135483_13636_5	TGTGTGTGTGTG	TG(2*6)	2192	12	CTTCCTAACTCTCTGGCAAGGATTGGCAGATTTTTTGTTAATTAAGCCAA[TGTGTGTGTGTG]TACTTGTCCGCGTGCGTCAAGGTGTATGTTAT	CTTCCTAACTCTCTGGCAAGGAT	60.261	0.478261	ATAACATACACCTTGACGCACG	59.948	0.454545	94
isoform_135551_13707_3	GAGAGAGAGAGAGAGAGA	GA(2*9)	2341	18	AGCATCTAGAGCTGGCTGTTGTAATCAATGAGAACTAATTAATGGATTGAGT[GAGAGAGAGAGAGAGAGA]GCGCTTTAATTGCCGTCCTCGGACACCTAAATATGACCTATGGGACCAAAGATACATGTGATGT	AGCATCTAGAGCTGGCTGTTGTA	60.586	0.478261	ACATCACATGTATCTTTGGTCCC	59.997	0.434783	134
isoform_135572_13710_1	TCTCTCTCTCTCTCTCTCTCTCTCTCTCTC	TC(2*15)	151	30	GAAGAGAGGGAGCTATTCAGAGGGAGCT[TCTCTCTCTCTCTCTCTCTCTCTCTCTCTC]ATGGAGTGCAGCTGCTATTCGTAGCAACACCATGAGTTG	GAAGAGAGGGAGCTATTCAGAGG	59.995	0.521739	CAACTCATGGTGTTGCTACGAAT	61.311	0.434783	97
isoform_135572_13710_2	TCTCTCTCTCTCTCTCTCTCTCTCTCTCTC	TC(2*15)	151	30	GAAGAGAGGGAGCTATTCAGAGGGAGCT[TCTCTCTCTCTCTCTCTCTCTCTCTCTCTC]ATGGAGTGCAGCTGCTATTCGTAGCAACACCATGAGTTGTGTG	GAAGAGAGGGAGCTATTCAGAGG	59.995	0.521739	CACACAACTCATGGTGTTGCTA	59.682	0.454545	101
isoform_135572_13710_3	TCTCTCTCTCTCTCTCTCTCTCTCTCTCTC	TC(2*15)	151	30	GAAGAGAGGGAGCTATTCAGAGGGAGCT[TCTCTCTCTCTCTCTCTCTCTCTCTCTCTC]ATGGAGTGCAGCTGCTATTCGTAGCAACACCATGAGTTGT	GAAGAGAGGGAGCTATTCAGAGG	59.995	0.521739	ACAACTCATGGTGTTGCTACGA	60.613	0.454545	98
isoform_135572_13710_4	TCTCTCTCTCTCTCTCTCTCTCTCTCTCTC	TC(2*15)	151	30	GAAGAGAGGGAGCTATTCAGAGGGAGCT[TCTCTCTCTCTCTCTCTCTCTCTCTCTCTC]ATGGAGTGCAGCTGCTATTCGTAGCAACACCATGAGTTGT	GAAGAGAGGGAGCTATTCAGAGG	59.995	0.521739	ACAACTCATGGTGTTGCTACGAA	61.854	0.434783	98
isoform_135572_13710_5	TCTCTCTCTCTCTCTCTCTCTCTCTCTCTC	TC(2*15)	151	30	GAAGAGAGGGAGCTATTCAGAGGGAGCT[TCTCTCTCTCTCTCTCTCTCTCTCTCTCTC]ATGGAGTGCAGCTGCTATTCGTAGCAACACCATGAGTTG	GAAGAGAGGGAGCTATTCAGAGG	59.995	0.521739	CAACTCATGGTGTTGCTACGAA	61.108	0.454545	97
isoform_135583_13713_2	GAGAGAGAGAGAGAGAGAGAGAGAGAGA	GA(2*14)	817	28	AGAGAGCGAGAGATATGAAACGATACATTAAAGTCTTCAAAAGGGTCGTCCTGCGGCTCCTCGCTTTTC[GAGAGAGAGAGAGAGAGAGAGAGAGAGA]AAATCAAATCCCTCACCGTCCCCAAAATTTCTACCGTGATTTT	AGAGAGCGAGAGATATGAAACGA	59.65	0.434783	AAAATCACGGTAGAAATTTTGGG	60.43	0.347826	140
isoform_135583_13713_3	GAGAGAGAGAGAGAGAGAGAGAGAGAGA	GA(2*14)	817	28	GAGAGAGCGAGAGATATGAAACGATACATTAAAGTCTTCAAAAGGGTCGTCCTGCGGCTCCTCGCTTTTC[GAGAGAGAGAGAGAGAGAGAGAGAGAGA]AAATCAAATCCCTCACCGTCCCCAAAATTTCTACCGTGATTTT	GAGAGAGCGAGAGATATGAAACG	59.65	0.478261	AAAATCACGGTAGAAATTTTGGG	60.43	0.347826	141
isoform_135583_13713_4	GAGAGAGAGAGAGAGAGAGAGAGAGAGA	GA(2*14)	817	28	CATTAAAGTCTTCAAAAGGGTCGTCCTGCGGCTCCTCGCTTTTC[GAGAGAGAGAGAGAGAGAGAGAGAGAGA]AAATCAAATCCCTCACCGTCCCCAAAATTTCTACCGTGATTTT	CATTAAAGTCTTCAAAAGGGTCG	59.211	0.391304	AAAATCACGGTAGAAATTTTGGG	60.43	0.347826	115
isoform_135645_13721_1	GAGAGAGAGAGAGAGAGA	GA(2*9)	3186	18	TAGTAAGCAGTGGTATCAACGCAGAGTACGGGG[GAGAGAGAGAGAGAGAGA]GCGAGAGAGGACGATAAGAGCGGCAGCGATGGAGAAAATGTTCGGGCCTGCGTACGCTGGGGACCCTGGAGTTCCCCACTCTGGCAAAGATGGGTTTT	TAGTAAGCAGTGGTATCAACGCA	59.85	0.434783	AAAACCCATCTTTGCCAGAGT	59.99	0.428571	153
isoform_135645_13721_2	GAGAGAGAGAGAGAGAGA	GA(2*9)	3186	18	TTTACTTCGTTCACTCTCCCGTACTCTGCGTTTGATACCACTGCTTACTAGTAAGCAGTGGTATCAACGCAGAGTACGGGGG[GAGAGAGAGAGAGAGAGA]GCGAGAGAGGACGATAAGAGCGG	TTTACTTCGTTCACTCTCCCGTA	60.169	0.434783	CCGCTCTTATCGTCCTCTCTC	60.49	0.571429	123
isoform_135645_13721_3	GAGAGAGAGAGAGAGAGA	GA(2*9)	3186	18	CGTCGTTTCTTTACTTCGTTCACTCTCCCGTACTCTGCGTTTGATACCACTGCTTACTAGTAAGCAGTGGTATCAACGCAGAGTACGGGGG[GAGAGAGAGAGAGAGAGA]GCGAGAGAGGACGATAAGAGCGG	CGTCGTTTCTTTACTTCGTTCAC	60.208	0.434783	CCGCTCTTATCGTCCTCTCTC	60.49	0.571429	132
isoform_135645_13721_4	GAGAGAGAGAGAGAGAGA	GA(2*9)	3186	18	AGTAAGCAGTGGTATCAACGCAGAGTACGGGG[GAGAGAGAGAGAGAGAGA]GCGAGAGAGGACGATAAGAGCGGCAGCGATGGAGAAAATGTTCGGGCCTGCGTACGCTGGGGACCCTGGAGTTCCCCACTCTGGCAAAGATGGGTTTT	AGTAAGCAGTGGTATCAACGCAG	60.723	0.478261	AAAACCCATCTTTGCCAGAGT	59.99	0.428571	152
isoform_135645_13721_5	GAGAGAGAGAGAGAGAGA	GA(2*9)	3186	18	ACCCTTCAAGTGCTATTTCCTCTCGCGTCGTTTCTTTACTTCGTTCACTCTCCCGTACTCTGCGTTTGATACCACTGCTTACTAGTAAGCAGTGGTATCAACGCAGAGTACGGGGG[GAGAGAGAGAGAGAGAGA]GCGAGAGAGGACGATAAGAGCGG	ACCCTTCAAGTGCTATTTCCTCT	59.685	0.434783	CCGCTCTTATCGTCCTCTCTC	60.49	0.571429	157
isoform_135662_13722_2	AGAGAGAGAGAGAG	AG(2*7)	162	14	GGCAAGGGTGTATGTAAGAGAGAATAATCTCTGCATGTTGTCTAACATGTCTTTCGCAGGCCGAAGCAGTTGGAAAAGGAGCC[AGAGAGAGAGAGAG]AAGCCATCACGCAGCTCCCTATCGGACTCTAAGGAAA	GGCAAGGGTGTATGTAAGAGAGA	59.666	0.478261	TTTCCTTAGAGTCCGATAGGGAG	60.095	0.478261	134
isoform_135662_13722_4	AGAGAGAGAGAGAG	AG(2*7)	162	14	GGCAAGGGTGTATGTAAGAGAGAATAATCTCTGCATGTTGTCTAACATGTCTTTCGCAGGCCGAAGCAGTTGGAAAAGGAGCC[AGAGAGAGAGAGAG]AAGCCATCACGCAGCTCCCTATCGGACTCTAAGGAAAAG	GGCAAGGGTGTATGTAAGAGAGA	59.666	0.478261	CTTTTCCTTAGAGTCCGATAGGG	59.653	0.478261	136
isoform_135662_13722_5	AGAGAGAGAGAGAG	AG(2*7)	162	14	TGTTGTCTAACATGTCTTTCGCAGGCCGAAGCAGTTGGAAAAGGAGCC[AGAGAGAGAGAGAG]AAGCCATCACGCAGCTCCCTATCGGACTCTAAGGAAA	TGTTGTCTAACATGTCTTTCGCA	60.714	0.391304	TTTCCTTAGAGTCCGATAGGGAG	60.095	0.478261	99
isoform_135662_13723_1	CACACACACACACACACACACACACA	CA(2*13)	266	26	CTCCCTATCGGACTCTAAGGAAAAGAAGGGGAAATTTGTGGAGATGGTTGAGCTTTAAGATTGGATCAATTAAGCT[CACACACACACACACACACACACACA]TACATCGATCATGGCAGAGCATCGTGATAGAGGCCTTT	CTCCCTATCGGACTCTAAGGAAA	60.095	0.478261	AAAGGCCTCTATCACGATGCT	60.243	0.47619	140
isoform_135662_13723_2	CACACACACACACACACACACACACA	CA(2*13)	266	26	GTGGAGATGGTTGAGCTTTAAGATTGGATCAATTAAGCT[CACACACACACACACACACACACACA]TACATCGATCATGGCAGAGCATCGTGATAGAGGCCTTT	GTGGAGATGGTTGAGCTTTAAGA	59.776	0.434783	AAAGGCCTCTATCACGATGCT	60.243	0.47619	103
isoform_135662_13723_3	CACACACACACACACACACACACACA	CA(2*13)	266	26	CTCCCTATCGGACTCTAAGGAAAAGAAGGGGAAATTTGTGGAGATGGTTGAGCTTTAAGATTGGATCAATTAAGCT[CACACACACACACACACACACACACA]TACATCGATCATGGCAGAGCATCGTGATAGAGGCCT	CTCCCTATCGGACTCTAAGGAAA	60.095	0.478261	AGGCCTCTATCACGATGCTCT	60.384	0.52381	138
isoform_135662_13723_4	CACACACACACACACACACACACACA	CA(2*13)	266	26	CTCCCTATCGGACTCTAAGGAAAAGAAGGGGAAATTTGTGGAGATGGTTGAGCTTTAAGATTGGATCAATTAAGCT[CACACACACACACACACACACACACA]TACATCGATCATGGCAGAGCATCGTGATAGAGGCCTTTT	CTCCCTATCGGACTCTAAGGAAA	60.095	0.478261	AAAAGGCCTCTATCACGATGCT	61.439	0.454545	141
isoform_135662_13723_5	CACACACACACACACACACACACACA	CA(2*13)	266	26	CTCCCTATCGGACTCTAAGGAAAAGAAGGGGAAATTTGTGGAGATGGTTGAGCTTTAAGATTGGATCAATTAAGCT[CACACACACACACACACACACACACA]TACATCGATCATGGCAGAGCATCGTGATAGAGGCCTTTTCCAT	CTCCCTATCGGACTCTAAGGAAA	60.095	0.478261	ATGGAAAAGGCCTCTATCACG	60.457	0.47619	145
isoform_135664_13724_2	AGAGAGAGAGAGAGAGAGAGAG	AG(2*11)	772	22	GTGTGATAACAGTGTTGCGAAGAACGTGAGGAGGATAATTCAGCTGCAGGT[AGAGAGAGAGAGAGAGAGAGAG]AATTGTAAATGAGAGAGCTGGAAGATGAGCAGCGACAACGTGAATATGACAG	GTGTGATAACAGTGTTGCGAAGA	60.225	0.434783	CTGTCATATTCACGTTGTCGCT	60.197	0.454545	125
isoform_135664_13724_3	AGAGAGAGAGAGAGAGAGAGAG	AG(2*11)	772	22	GTGTGATAACAGTGTTGCGAAGAACGTGAGGAGGATAATTCAGCTGCAGGT[AGAGAGAGAGAGAGAGAGAGAG]AATTGTAAATGAGAGAGCTGGAAGATGAGCAGCGACAACGTGAATATGACAGCT	GTGTGATAACAGTGTTGCGAAGA	60.225	0.434783	AGCTGTCATATTCACGTTGTCG	60.197	0.454545	127
isoform_135740_13743_1	CACACACACACA	CA(2*6)	466	12	ACAGATAGGGAAAAAGCGATACCAATCTCATAAAAGCGAACTTCATCGCACTCATTTGTTGAGCAAGCCCTCTTTGAAC[CACACACACACA]CCTCTTCTTTATTGGAAACAAGATTGATAAACGCCAG	ACAGATAGGGAAAAAGCGATACC	59.886	0.434783	CTGGCGTTTATCAATCTTGTTTC	60.017	0.391304	128
isoform_135740_13743_2	CACACACACACA	CA(2*6)	466	12	ACAGATAGGGAAAAAGCGATACCAATCTCATAAAAGCGAACTTCATCGCACTCATTTGTTGAGCAAGCCCTCTTTGAAC[CACACACACACA]CCTCTTCTTTATTGGAAACAAGATTGATAAACGCCAGA	ACAGATAGGGAAAAAGCGATACC	59.886	0.434783	TCTGGCGTTTATCAATCTTGTTT	60.017	0.347826	129
isoform_135740_13743_3	CACACACACACA	CA(2*6)	466	12	ACAGATAGGGAAAAAGCGATACCAATCTCATAAAAGCGAACTTCATCGCACTCATTTGTTGAGCAAGCCCTCTTTGAAC[CACACACACACA]CCTCTTCTTTATTGGAAACAAGATTGATAAACGCCAGAAGCTTTATCGAAGCAGTA	ACAGATAGGGAAAAAGCGATACC	59.886	0.434783	TACTGCTTCGATAAAGCTTCTGG	60.05	0.434783	147
isoform_135740_13743_4	CACACACACACA	CA(2*6)	466	12	ATAGGGAAAAAGCGATACCAATCTCATAAAAGCGAACTTCATCGCACTCATTTGTTGAGCAAGCCCTCTTTGAAC[CACACACACACA]CCTCTTCTTTATTGGAAACAAGATTGATAAACGCCAG	ATAGGGAAAAAGCGATACCAATC	59.741	0.391304	CTGGCGTTTATCAATCTTGTTTC	60.017	0.391304	124
isoform_135740_13743_5	CACACACACACA	CA(2*6)	466	12	ATAGGGAAAAAGCGATACCAATCTCATAAAAGCGAACTTCATCGCACTCATTTGTTGAGCAAGCCCTCTTTGAAC[CACACACACACA]CCTCTTCTTTATTGGAAACAAGATTGATAAACGCCAGA	ATAGGGAAAAAGCGATACCAATC	59.741	0.391304	TCTGGCGTTTATCAATCTTGTTT	60.017	0.347826	125
isoform_135747_13745_1	CTCTCTCTCTCT	CT(2*6)	1084	12	TATTTCACAACAACCATTCACCAC[CTCTCTCTCTCT]CCAAAACAAAAGAATGTCTCAAATACCTCTAGTGACCCATTCTATGGTAACAAAGTTGTAAGATACACGAGGCTCATCGTATGGTGGCTGATTGGGTGAATGCGATAGACACTAGCCT	TATTTCACAACAACCATTCACCA	60.138	0.347826	AGGCTAGTGTCTATCGCATTCAC	59.824	0.478261	154
isoform_135747_13745_2	CTCTCTCTCTCT	CT(2*6)	1084	12	TATTTCACAACAACCATTCACCAC[CTCTCTCTCTCT]CCAAAACAAAAGAATGTCTCAAATACCTCTAGTGACCCATTCTATGGTAACAAAGTTGTAAGATACACGAGGCTCATCGT	TATTTCACAACAACCATTCACCA	60.138	0.347826	ACGATGAGCCTCGTGTATCTTAC	59.693	0.478261	116
isoform_135747_13745_3	CTCTCTCTCTCT	CT(2*6)	1084	12	TATTTCACAACAACCATTCACCAC[CTCTCTCTCTCT]CCAAAACAAAAGAATGTCTCAAATACCTCTAGTGACCCATTCTATGGTAACAAAGTTGTAAGATACACGAGGCTCATCGTATGGTGGCTGATTGGGTGAATGCGATAGACACTAGCCTA	TATTTCACAACAACCATTCACCA	60.138	0.347826	TAGGCTAGTGTCTATCGCATTCA	59.068	0.434783	155
isoform_135747_13745_4	CTCTCTCTCTCT	CT(2*6)	1084	12	ATTTCACAACAACCATTCACCAC[CTCTCTCTCTCT]CCAAAACAAAAGAATGTCTCAAATACCTCTAGTGACCCATTCTATGGTAACAAAGTTGTAAGATACACGAGGCTCATCGTATGGTGGCTGATTGGGTGAATGCGATAGACACTAGCCT	ATTTCACAACAACCATTCACCAC	60.918	0.391304	AGGCTAGTGTCTATCGCATTCAC	59.824	0.478261	153
isoform_135747_13745_5	CTCTCTCTCTCT	CT(2*6)	1084	12	TATTTCACAACAACCATTCACCAC[CTCTCTCTCTCT]CCAAAACAAAAGAATGTCTCAAATACCTCTAGTGACCCATTCTATGGTAACAAAGTTGTAAGATACACGAGGCTCATCGTATGGTGGCTGATTGGGTGAATGCGATAGACACTAGCCTAG	TATTTCACAACAACCATTCACCA	60.138	0.347826	CTAGGCTAGTGTCTATCGCATTCA	59.958	0.458333	156
isoform_135749_13746_1	TCTCTCTCTCTCTCTC	TC(2*8)	2091	16	AAAAATGGCATGTCACTCACAATTGTGAGAACTTAAATTTAAAAATATGGATCTCTGAAAATGATCTATTGTAAAGAGAATTTTGGACAAAT[TCTCTCTCTCTCTCTC]ACTCTAGAAAGGTAGAATTATTCTGCCTTCTCCCAACA	AAAAATGGCATGTCACTCACAAT	60.646	0.347826	TGTTGGGAGAAGGCAGAATAAT	59.966	0.409091	146
isoform_135749_13746_2	TCTCTCTCTCTCTCTC	TC(2*8)	2091	16	AAAAATGGCATGTCACTCACAATTGTGAGAACTTAAATTTAAAAATATGGATCTCTGAAAATGATCTATTGTAAAGAGAATTTTGGACAAAT[TCTCTCTCTCTCTCTC]ACTCTAGAAAGGTAGAATTATTCTGCCTTCTCCCAACAA	AAAAATGGCATGTCACTCACAAT	60.646	0.347826	TTGTTGGGAGAAGGCAGAATAAT	61.147	0.391304	147
isoform_135749_13746_3	TCTCTCTCTCTCTCTC	TC(2*8)	2091	16	AAAAATGGCATGTCACTCACAATTGTGAGAACTTAAATTTAAAAATATGGATCTCTGAAAATGATCTATTGTAAAGAGAATTTTGGACAAAT[TCTCTCTCTCTCTCTC]ACTCTAGAAAGGTAGAATTATTCTGCCTTCTCCCAACAAAT	AAAAATGGCATGTCACTCACAAT	60.646	0.347826	ATTTGTTGGGAGAAGGCAGAATA	61.147	0.391304	149
isoform_135749_13746_4	TCTCTCTCTCTCTCTC	TC(2*8)	2091	16	AAAAATGGCATGTCACTCACAATTGTGAGAACTTAAATTTAAAAATATGGATCTCTGAAAATGATCTATTGTAAAGAGAATTTTGGACAAAT[TCTCTCTCTCTCTCTC]ACTCTAGAAAGGTAGAATTATTCTGCCTTCTCCCAACA	AAAAATGGCATGTCACTCACAA	60.407	0.363636	TGTTGGGAGAAGGCAGAATAAT	59.966	0.409091	146
isoform_135749_13746_5	TCTCTCTCTCTCTCTC	TC(2*8)	2091	16	AAAAATGGCATGTCACTCACAATTGTGAGAACTTAAATTTAAAAATATGGATCTCTGAAAATGATCTATTGTAAAGAGAATTTTGGACAAAT[TCTCTCTCTCTCTCTC]ACTCTAGAAAGGTAGAATTATTCTGCCTTCTCCCAACAA	AAAAATGGCATGTCACTCACAA	60.407	0.363636	TTGTTGGGAGAAGGCAGAATAAT	61.147	0.391304	147
isoform_135749_13747_1	TGTGTGTGTGTGTGTG	TG(2*8)	2947	16	CCACACAAGGTGAGAATGAGAATTGAGA[TGTGTGTGTGTGTGTG]CGCGCGTGTGTGCCCAAGCTAGCTACCCCCCTCCTTGCAAGCACTTGCCCACCCTCCTTGCATATCATTGGCCCTCTCTAAT	CCACACAAGGTGAGAATGAGAAT	60.409	0.434783	ATTAGAGAGGGCCAATGATATGC	60.651	0.434783	126
isoform_135749_13747_2	TGTGTGTGTGTGTGTG	TG(2*8)	2947	16	CCACACAAGGTGAGAATGAGAATTGAGA[TGTGTGTGTGTGTGTG]CGCGCGTGTGTGCCCAAGCTAGCTACCCCCCTCCTTGCAAGCACTTGCCCACCCTCCTTGCATATCATTGGCCCTCTCTAATC	CCACACAAGGTGAGAATGAGAAT	60.409	0.434783	GATTAGAGAGGGCCAATGATATG	58.987	0.434783	127
isoform_135749_13747_3	TGTGTGTGTGTGTGTG	TG(2*8)	2947	16	CACAAGGTGAGAATGAGAATTGAGA[TGTGTGTGTGTGTGTG]CGCGCGTGTGTGCCCAAGCTAGCTACCCCCCTCCTTGCAAGCACTTGCCCACCCTCCTTGCATATCATTGGCCCTCTCTAAT	CACAAGGTGAGAATGAGAATTGA	59.228	0.391304	ATTAGAGAGGGCCAATGATATGC	60.651	0.434783	123
isoform_135749_13747_4	TGTGTGTGTGTGTGTG	TG(2*8)	2947	16	ACCACACAAGGTGAGAATGAGAATTGAGA[TGTGTGTGTGTGTGTG]CGCGCGTGTGTGCCCAAGCTAGCTACCCCCCTCCTTGCAAGCACTTGCCCACCCTCCTTGCATATCATTGGCCCTCTCTAAT	ACCACACAAGGTGAGAATGAGAA	60.956	0.434783	ATTAGAGAGGGCCAATGATATGC	60.651	0.434783	127
isoform_135749_13747_5	TGTGTGTGTGTGTGTG	TG(2*8)	2947	16	ACACAAGGTGAGAATGAGAATTGAGA[TGTGTGTGTGTGTGTG]CGCGCGTGTGTGCCCAAGCTAGCTACCCCCCTCCTTGCAAGCACTTGCCCACCCTCCTTGCATATCATTGGCCCTCTCTAAT	ACACAAGGTGAGAATGAGAATTGA	60.04	0.375	ATTAGAGAGGGCCAATGATATGC	60.651	0.434783	124
isoform_135811_13767_1	GAGAGAGAGAGAGAGAGAGA	GA(2*10)	1190	20	TAGTAAGCAGTGGTATCAACGCAGAGTACGGGG[GAGAGAGAGAGAGAGAGA]GCGAGAGAGGACGATAAGAGCGGCAGCGATGGAGAAAATGTTCGGGCCTGCGTACGCTGGGGACCCTGGAGTTCCCCACTCTGGCAAAGATGGGTTTT	TAGTAAGCAGTGGTATCAACGCA	59.85	0.434783	AAAACCCATCTTTGCCAGAGT	59.99	0.428571	151
isoform_135811_13767_2	GAGAGAGAGAGAGAGAGAGA	GA(2*10)	1190	20	TGCGTTGATACCACTGCTTACTAGTAAGCAGTGGTATCAACGCAGAGTACGGGG[GAGAGAGAGAGAGAGAGA]GCGAGAGAGGACGATAAGAGCGG	TGCGTTGATACCACTGCTTACTA	59.85	0.434783	CCGCTCTTATCGTCCTCTCTC	60.49	0.571429	97
isoform_135811_13767_4	GAGAGAGAGAGAGAGAGAGA	GA(2*10)	1190	20	AGTAAGCAGTGGTATCAACGCAGAGTACGGGG[GAGAGAGAGAGAGAGAGA]GCGAGAGAGGACGATAAGAGCGGCAGCGATGGAGAAAATGTTCGGGCCTGCGTACGCTGGGGACCCTGGAGTTCCCCACTCTGGCAAAGATGGGTTTT	AGTAAGCAGTGGTATCAACGCAG	60.723	0.478261	AAAACCCATCTTTGCCAGAGT	59.99	0.428571	150
isoform_135811_13767_5	GAGAGAGAGAGAGAGAGAGA	GA(2*10)	1190	20	TAGTAAGCAGTGGTATCAACGCAGAGTACGGGG[GAGAGAGAGAGAGAGAGA]GCGAGAGAGGACGATAAGAGCGGCAGCGATGGAGAAAATGTTCGGGCCTGCGTACGCTGGGGACCCTGGAGTTCCCCACTCTGGCAAAGATGGGTTTTC	TAGTAAGCAGTGGTATCAACGCA	59.85	0.434783	GAAAACCCATCTTTGCCAGAGT	61.703	0.454545	152
isoform_135825_13771_1	GAGAGAGAGAGAGAGA	GA(2*8)	256	16	GTCAATAACTCTGCCTTTGGTTGCTGCACTCTTGCAATTACGTTTATATTATGTTCGCCT[GAGAGAGAGAGAGAGA]GTTGAGACGCGAGAGGGAGAGCTGTTCTTTCTGCTGAGA	GTCAATAACTCTGCCTTTGGTTG	60.048	0.434783	TCTCAGCAGAAAGAACAGCTCTC	60.45	0.478261	115
isoform_135825_13771_2	GAGAGAGAGAGAGAGA	GA(2*8)	256	16	TGTCAATAACTCTGCCTTTGGTTGCTGCACTCTTGCAATTACGTTTATATTATGTTCGCCT[GAGAGAGAGAGAGAGA]GTTGAGACGCGAGAGGGAGAGCTGTTCTTTCTGCTGAGA	TGTCAATAACTCTGCCTTTGGTT	60.048	0.391304	TCTCAGCAGAAAGAACAGCTCTC	60.45	0.478261	116
isoform_135825_13771_3	GAGAGAGAGAGAGAGA	GA(2*8)	256	16	GTCAATAACTCTGCCTTTGGTTGCTGCACTCTTGCAATTACGTTTATATTATGTTCGCCT[GAGAGAGAGAGAGAGA]GTTGAGACGCGAGAGGGAGAGCTGTTCTTTCTGCTGAGACT	GTCAATAACTCTGCCTTTGGTTG	60.048	0.434783	AGTCTCAGCAGAAAGAACAGCTC	59.47	0.478261	117
isoform_135825_13771_4	GAGAGAGAGAGAGAGA	GA(2*8)	256	16	TGTCAATAACTCTGCCTTTGGTTGCTGCACTCTTGCAATTACGTTTATATTATGTTCGCCT[GAGAGAGAGAGAGAGA]GTTGAGACGCGAGAGGGAGAGCTGTTCTTTCTGCTGAGACT	TGTCAATAACTCTGCCTTTGGTT	60.048	0.391304	AGTCTCAGCAGAAAGAACAGCTC	59.47	0.478261	118
isoform_135825_13771_5	GAGAGAGAGAGAGAGA	GA(2*8)	256	16	GTGTCAATAACTCTGCCTTTGGTTGCTGCACTCTTGCAATTACGTTTATATTATGTTCGCCT[GAGAGAGAGAGAGAGA]GTTGAGACGCGAGAGGGAGAGCTGTTCTTTCTGCTGAGA	GTGTCAATAACTCTGCCTTTGGT	59.578	0.434783	TCTCAGCAGAAAGAACAGCTCTC	60.45	0.478261	117
isoform_135860_13777_1	AAGAAGAAGAAGAAG	AAG(3*5)	411	15	ATCCATCTAACGCGTACCTTTTCTCTGCTCGTTGGCGAACAGTGGACACCATCCCATCC[AAGAAGAAGAAGAAG]AAAACGAAAGCATCTCCTATCGGGGAAGGGAGCATGCAGGACTACCTTGATGCTTTTT	ATCCATCTAACGCGTACCTTTTC	60.706	0.434783	AAAAAGCATCAAGGTAGTCCTGC	60.976	0.434783	132
isoform_135860_13777_2	AAGAAGAAGAAGAAG	AAG(3*5)	411	15	ATCCATCTAACGCGTACCTTTTCTCTGCTCGTTGGCGAACAGTGGACACCATCCCATCC[AAGAAGAAGAAGAAG]AAAACGAAAGCATCTCCTATCGGGGAAGGGAGCATGCAGGACTACCTTGATGCTT	ATCCATCTAACGCGTACCTTTTC	60.706	0.434783	AAGCATCAAGGTAGTCCTGCAT	60.158	0.454545	129
isoform_135860_13777_3	AAGAAGAAGAAGAAG	AAG(3*5)	411	15	ATCCATCTAACGCGTACCTTTTCTCTGCTCGTTGGCGAACAGTGGACACCATCCCATCC[AAGAAGAAGAAGAAG]AAAACGAAAGCATCTCCTATCGGGGAAGGGAGCATGCAGGACTACCTTGATGCTTTT	ATCCATCTAACGCGTACCTTTTC	60.706	0.434783	AAAAGCATCAAGGTAGTCCTGC	59.789	0.454545	131
isoform_135860_13777_4	AAGAAGAAGAAGAAG	AAG(3*5)	411	15	ATCTAACGCGTACCTTTTCTCTGCTCGTTGGCGAACAGTGGACACCATCCCATCC[AAGAAGAAGAAGAAG]AAAACGAAAGCATCTCCTATCGGGGAAGGGAGCATGCAGGACTACCTTGATGCTTTTT	ATCTAACGCGTACCTTTTCTCTG	59.027	0.434783	AAAAAGCATCAAGGTAGTCCTGC	60.976	0.434783	128
isoform_135860_13777_5	AAGAAGAAGAAGAAG	AAG(3*5)	411	15	CATCTAACGCGTACCTTTTCTCTGCTCGTTGGCGAACAGTGGACACCATCCCATCC[AAGAAGAAGAAGAAG]AAAACGAAAGCATCTCCTATCGGGGAAGGGAGCATGCAGGACTACCTTGATGCTTTTT	CATCTAACGCGTACCTTTTCTCT	59.027	0.434783	AAAAAGCATCAAGGTAGTCCTGC	60.976	0.434783	129
isoform_135905_13780_1	AAAGAAAGAAAGAAAGAAAGAAAG	AAAG(4*6)	2459	24	GGCGTAAGTAGATCCCTGAGATTGAAGAATGCAAATGAGAAAAAGCAGAACATTGTTTGCAGGCAAGATTTAGC[AAAGAAAGAAAGAAAGAAAGAAAG]CTTTATTTACGTCTGAAGGCCGTA	GGCGTAAGTAGATCCCTGAGATT	60.004	0.478261	TACGGCCTTCAGACGTAAATAAA	60.032	0.391304	122
isoform_135905_13780_2	AAAGAAAGAAAGAAAGAAAGAAAG	AAAG(4*6)	2459	24	AGAATGCAAATGAGAAAAAGCAGAACATTGTTTGCAGGCAAGATTTAGC[AAAGAAAGAAAGAAAGAAAGAAAG]CTTTATTTACGTCTGAAGGCCGTA	AGAATGCAAATGAGAAAAAGCAG	59.912	0.347826	TACGGCCTTCAGACGTAAATAAA	60.032	0.391304	97
isoform_135905_13780_3	AAAGAAAGAAAGAAAGAAAGAAAG	AAAG(4*6)	2459	24	GCAAATGAGAAAAAGCAGAACATTGTTTGCAGGCAAGATTTAGC[AAAGAAAGAAAGAAAGAAAGAAAG]CTTTATTTACGTCTGAAGGCCGTA	GCAAATGAGAAAAAGCAGAACAT	59.791	0.347826	TACGGCCTTCAGACGTAAATAAA	60.032	0.391304	92
isoform_135905_13780_4	AAAGAAAGAAAGAAAGAAAGAAAG	AAAG(4*6)	2459	24	ATGCAAATGAGAAAAAGCAGAACATTGTTTGCAGGCAAGATTTAGC[AAAGAAAGAAAGAAAGAAAGAAAG]CTTTATTTACGTCTGAAGGCCGTA	ATGCAAATGAGAAAAAGCAGAAC	59.791	0.347826	TACGGCCTTCAGACGTAAATAAA	60.032	0.391304	94
isoform_135905_13780_5	AAAGAAAGAAAGAAAGAAAGAAAG	AAAG(4*6)	2459	24	AATGCAAATGAGAAAAAGCAGAACATTGTTTGCAGGCAAGATTTAGC[AAAGAAAGAAAGAAAGAAAGAAAG]CTTTATTTACGTCTGAAGGCCGTA	AATGCAAATGAGAAAAAGCAGAA	60.245	0.304348	TACGGCCTTCAGACGTAAATAAA	60.032	0.391304	95
isoform_135927_13782_1	GTGTGTGTGTGTGT	GT(2*7)	1173	14	AGTGCTGTCAGAGAAAATCCTCAGGAGCTCCCTCTCCTCACCGTTTCTTTTTTTCTTGG[GTGTGTGTGTGTGT]ACGCGCACGCGCTAAGTGTAGGTGAGCTCTGCCCTCTAGTGCCCCTTTGTATGAGAC	AGTGCTGTCAGAGAAAATCCTCA	60.43	0.434783	GTCTCATACAAAGGGGCACTAGA	59.666	0.478261	130
isoform_135927_13782_2	GTGTGTGTGTGTGT	GT(2*7)	1173	14	CAGGAGTGCTGTCAGAGAAAATCCTCAGGAGCTCCCTCTCCTCACCGTTTCTTTTTTTCTTGG[GTGTGTGTGTGTGT]ACGCGCACGCGCTAAGTGTAGGTGAGCTCTGCCCTCTAGTGCCCCTTTGTATGAGAC	CAGGAGTGCTGTCAGAGAAAATC	60.43	0.478261	GTCTCATACAAAGGGGCACTAGA	59.666	0.478261	134
isoform_135927_13782_3	GTGTGTGTGTGTGT	GT(2*7)	1173	14	AGTGCTGTCAGAGAAAATCCTCAGGAGCTCCCTCTCCTCACCGTTTCTTTTTTTCTTGG[GTGTGTGTGTGTGT]ACGCGCACGCGCTAAGTGTAGGTGAGCTCTGCCCTCTAGT	AGTGCTGTCAGAGAAAATCCTCA	60.43	0.434783	ACTAGAGGGCAGAGCTCACCTAC	60.453	0.565217	113
isoform_135927_13782_4	GTGTGTGTGTGTGT	GT(2*7)	1173	14	CAGGAGTGCTGTCAGAGAAAATCCTCAGGAGCTCCCTCTCCTCACCGTTTCTTTTTTTCTTGG[GTGTGTGTGTGTGT]ACGCGCACGCGCTAAGTGTAGGTGAGCTCTGCCCTCTAGT	CAGGAGTGCTGTCAGAGAAAATC	60.43	0.478261	ACTAGAGGGCAGAGCTCACCTAC	60.453	0.565217	117
isoform_135927_13782_5	GTGTGTGTGTGTGT	GT(2*7)	1173	14	AGTGCTGTCAGAGAAAATCCTCAGGAGCTCCCTCTCCTCACCGTTTCTTTTTTTCTTGG[GTGTGTGTGTGTGT]ACGCGCACGCGCTAAGTGTAGGTGAGCTCTGCCCTCTAGTGCCCCTTTGTATGAGACTACCTGGCTGTGGA	AGTGCTGTCAGAGAAAATCCTCA	60.43	0.434783	TCCACAGCCAGGTAGTCTCATAC	60.563	0.521739	144
isoform_135931_13783_1	AGAGAGAGAGAG	AG(2*6)	1569	12	GGATGATTTGATCTTTCTTTCCCATATGGAACACGATGGTGCAAACGTGTTGAGGCA[AGAGAGAGAGAG]ATTAACAGTTTTAATACGTCCAATCACTGGCTGAAAATGATGTGTTTT	GGATGATTTGATCTTTCTTTCCC	60.141	0.391304	AAAACACATCATTTTCAGCCAGT	59.926	0.347826	117
isoform_135931_13783_2	AGAGAGAGAGAG	AG(2*6)	1569	12	GGATGATTTGATCTTTCTTTCCCATATGGAACACGATGGTGCAAACGTGTTGAGGCA[AGAGAGAGAGAG]ATTAACAGTTTTAATACGTCCAATCACTGGCT	GGATGATTTGATCTTTCTTTCCC	60.141	0.391304	AGCCAGTGATTGGACGTATTAAA	59.912	0.391304	101
isoform_135931_13783_3	AGAGAGAGAGAG	AG(2*6)	1569	12	GATGATTTGATCTTTCTTTCCCATATGGAACACGATGGTGCAAACGTGTTGAGGCA[AGAGAGAGAGAG]ATTAACAGTTTTAATACGTCCAATCACTGGCTGAAAATGATGTGTTTT	GATGATTTGATCTTTCTTTCCCA	59.433	0.347826	AAAACACATCATTTTCAGCCAGT	59.926	0.347826	116
isoform_135931_13783_4	AGAGAGAGAGAG	AG(2*6)	1569	12	GATGATTTGATCTTTCTTTCCCATATGGAACACGATGGTGCAAACGTGTTGAGGCA[AGAGAGAGAGAG]ATTAACAGTTTTAATACGTCCAATCACTGGCT	GATGATTTGATCTTTCTTTCCCA	59.433	0.347826	AGCCAGTGATTGGACGTATTAAA	59.912	0.391304	100
isoform_135931_13783_5	AGAGAGAGAGAG	AG(2*6)	1569	12	AGCTCGAACTTTTCACTCTGGTTTAGATATCTCTTGCTAAGGATGATTTGATCTTTCTTTCCCATATGGAACACGATGGTGCAAACGTGTTGAGGCA[AGAGAGAGAGAG]ATTAACAGTTTTAATACGTCCAATCACTGGCTGAAAATGATGTGTTTT	AGCTCGAACTTTTCACTCTGGTT	60.802	0.434783	AAAACACATCATTTTCAGCCAGT	59.926	0.347826	157
isoform_13596_2677_1	GAGAGAGAGAGAGAGAGAGAGAGAGAGAGAGAGAGA	GA(2*18)	217	36	ACACCCTTCTGTGTAAGTGCTTCGTGTT[GAGAGAGAGAGAGAGAGAGAGAGAGAGAGAGAGAGA]GTTGCTTTTTCCTGTTAAAGCAATTATTTGTTCAGCTTTAAACTGGCTTTC	ACACCCTTCTGTGTAAGTGCTTC	59.734	0.478261	GAAAGCCAGTTTAAAGCTGAACA	59.946	0.391304	115
isoform_13596_2677_2	GAGAGAGAGAGAGAGAGAGAGAGAGAGAGAGAGAGA	GA(2*18)	217	36	ATCCACACCCTTCTGTGTAAGTGCTTCGTGTT[GAGAGAGAGAGAGAGAGAGAGAGAGAGAGAGAGAGA]GTTGCTTTTTCCTGTTAAAGCAATTATTTGTTCAGCTTTAAACTGGCTTTC	ATCCACACCCTTCTGTGTAAGTG	60.329	0.478261	GAAAGCCAGTTTAAAGCTGAACA	59.946	0.391304	119
isoform_13596_2677_5	GAGAGAGAGAGAGAGAGAGAGAGAGAGAGAGAGAGA	GA(2*18)	217	36	ACACCCTTCTGTGTAAGTGCTTCGTGTT[GAGAGAGAGAGAGAGAGAGAGAGAGAGAGAGAGAGA]GTTGCTTTTTCCTGTTAAAGCAATTATTTGTTCAGCTTTAAACTGGCTTTCGCCTTGAAAACGCAAGAGACGCACGCATATTTACAGACT	ACACCCTTCTGTGTAAGTGCTTC	59.734	0.478261	AGTCTGTAAATATGCGTGCGTCT	60.222	0.434783	154
isoform_136056_13792_1	GAAGAAGAAGAAGAAGAAGAAGAAGAA	GAA(3*9)	601	27	TCTTTCTATATCATCGCCGTACCCTCATCCTCATCAGAAGGGCCTCTGGCAGAGAATACAGCTCCGCGCAGAGCTCGAGTACTCTGCCATAGCCAAG[GAAGAAGAAGAAGAAGAAGAAGAAGAA]GATAGGCGCAACAATACGGATTAG	TCTTTCTATATCATCGCCGTACC	59.516	0.434783	CTAATCCGTATTGTTGCGCCTAT	61.475	0.434783	148
isoform_136056_13792_2	GAAGAAGAAGAAGAAGAAGAAGAAGAA	GAA(3*9)	601	27	TCTTTCTATATCATCGCCGTACCCTCATCCTCATCAGAAGGGCCTCTGGCAGAGAATACAGCTCCGCGCAGAGCTCGAGTACTCTGCCATAGCCAAG[GAAGAAGAAGAAGAAGAAGAAGAAGAA]GATAGGCGCAACAATACGGATTA	TCTTTCTATATCATCGCCGTACC	59.516	0.434783	TAATCCGTATTGTTGCGCCTAT	60.691	0.409091	147
isoform_136056_13792_3	GAAGAAGAAGAAGAAGAAGAAGAAGAA	GAA(3*9)	601	27	ACATCTTTCTATATCATCGCCGTACCCTCATCCTCATCAGAAGGGCCTCTGGCAGAGAATACAGCTCCGCGCAGAGCTCGAGTACTCTGCCATAGCCAAG[GAAGAAGAAGAAGAAGAAGAAGAAGAA]GATAGGCGCAACAATACGGATTAG	ACATCTTTCTATATCATCGCCGT	59.054	0.391304	CTAATCCGTATTGTTGCGCCTAT	61.475	0.434783	151
isoform_136056_13792_4	GAAGAAGAAGAAGAAGAAGAAGAAGAA	GAA(3*9)	601	27	TTTCTATATCATCGCCGTACCCTCATCCTCATCAGAAGGGCCTCTGGCAGAGAATACAGCTCCGCGCAGAGCTCGAGTACTCTGCCATAGCCAAG[GAAGAAGAAGAAGAAGAAGAAGAAGAA]GATAGGCGCAACAATACGGATTAG	TTTCTATATCATCGCCGTACCCT	61.008	0.434783	CTAATCCGTATTGTTGCGCCTAT	61.475	0.434783	146
isoform_136056_13792_5	GAAGAAGAAGAAGAAGAAGAAGAAGAA	GAA(3*9)	601	27	CTTTCTATATCATCGCCGTACCCTCATCCTCATCAGAAGGGCCTCTGGCAGAGAATACAGCTCCGCGCAGAGCTCGAGTACTCTGCCATAGCCAAG[GAAGAAGAAGAAGAAGAAGAAGAAGAA]GATAGGCGCAACAATACGGATTAG	CTTTCTATATCATCGCCGTACCC	61.008	0.478261	CTAATCCGTATTGTTGCGCCTAT	61.475	0.434783	147
isoform_136067_13794_1	TCTCTCTCTCTC	TC(2*6)	648	12	CACTTTGGTCAGGGACTCTTGCCCCTGCCGACGCACAACGGCCTGCTGCATCCCTGCATCCGTCATCG[TCTCTCTCTCTC]TTCTCACCACGCCTTATATGCCCCCCACGTTCCGAGTACATGTATA	CACTTTGGTCAGGGACTCTTG	59.748	0.52381	TATACATGTACTCGGAACGTGGG	61.007	0.478261	126
isoform_136067_13794_2	TCTCTCTCTCTC	TC(2*6)	648	12	CACTTTGGTCAGGGACTCTTGCCCCTGCCGACGCACAACGGCCTGCTGCATCCCTGCATCCGTCATCG[TCTCTCTCTCTC]TTCTCACCACGCCTTATATGCCCCCCACGTTCCGAGTACATGTATAA	CACTTTGGTCAGGGACTCTTG	59.748	0.52381	TTATACATGTACTCGGAACGTGG	58.955	0.434783	127
isoform_136067_13794_3	TCTCTCTCTCTC	TC(2*6)	648	12	CACTTTGGTCAGGGACTCTTGCCCCTGCCGACGCACAACGGCCTGCTGCATCCCTGCATCCGTCATCG[TCTCTCTCTCTC]TTCTCACCACGCCTTATATGCCCCCCACGTTCCGAGTACATGTATAAA	CACTTTGGTCAGGGACTCTTG	59.748	0.52381	TTTATACATGTACTCGGAACGTGG	60.179	0.416667	128
isoform_136067_13794_4	TCTCTCTCTCTC	TC(2*6)	648	12	CCACTTTGGTCAGGGACTCTTGCCCCTGCCGACGCACAACGGCCTGCTGCATCCCTGCATCCGTCATCG[TCTCTCTCTCTC]TTCTCACCACGCCTTATATGCCCCCCACGTTCCGAGTACATGTATA	CCACTTTGGTCAGGGACTCTT	60.529	0.52381	TATACATGTACTCGGAACGTGGG	61.007	0.478261	127
isoform_136067_13794_5	TCTCTCTCTCTC	TC(2*6)	648	12	CCACTTTGGTCAGGGACTCTTGCCCCTGCCGACGCACAACGGCCTGCTGCATCCCTGCATCCGTCATCG[TCTCTCTCTCTC]TTCTCACCACGCCTTATATGCCCCCCACGTTCCGAGTACATGTATAA	CCACTTTGGTCAGGGACTCTT	60.529	0.52381	TTATACATGTACTCGGAACGTGG	58.955	0.434783	128
isoform_136105_13796_1	GAGAGAGAGAGA	GA(2*6)	155	12	GAGTCCTACAAGGCAAGTGTTTGCAGTCACTCATGGGGGAGAGAGAGAGG[GAGAGAGAGAGA]GCGCCTTAATTGTTTTGTGGTCTTTTTCATTTGACATG	GAGTCCTACAAGGCAAGTGTTTG	60.212	0.478261	CATGTCAAATGAAAAAGACCACA	59.89	0.347826	100
isoform_136105_13796_2	GAGAGAGAGAGA	GA(2*6)	155	12	GAGTCCTACAAGGCAAGTGTTTGCAGTCACTCATGGGGGAGAGAGAGAGG[GAGAGAGAGAGA]GCGCCTTAATTGTTTTGTGGTCTTTTTCATTTGACATGGGTACCGTGACTGCCTTACACAAGGAAAG	GAGTCCTACAAGGCAAGTGTTTG	60.212	0.478261	CTTTCCTTGTGTAAGGCAGTCAC	60.212	0.478261	129
isoform_136105_13796_3	GAGAGAGAGAGA	GA(2*6)	155	12	GAGTCCTACAAGGCAAGTGTTTGCAGTCACTCATGGGGGAGAGAGAGAGG[GAGAGAGAGAGA]GCGCCTTAATTGTTTTGTGGTCTTTTTCATTTGACATGGGTACC	GAGTCCTACAAGGCAAGTGTTTG	60.212	0.478261	GGTACCCATGTCAAATGAAAAAG	59.638	0.391304	106
isoform_136105_13796_4	GAGAGAGAGAGA	GA(2*6)	155	12	AGGAGTCCTACAAGGCAAGTGTTTGCAGTCACTCATGGGGGAGAGAGAGAGG[GAGAGAGAGAGA]GCGCCTTAATTGTTTTGTGGTCTTTTTCATTTGACATG	AGGAGTCCTACAAGGCAAGTGTT	60.571	0.478261	CATGTCAAATGAAAAAGACCACA	59.89	0.347826	102
isoform_136105_13796_5	GAGAGAGAGAGA	GA(2*6)	155	12	GAGTCCTACAAGGCAAGTGTTTGCAGTCACTCATGGGGGAGAGAGAGAGG[GAGAGAGAGAGA]GCGCCTTAATTGTTTTGTGGTCTTTTTCATTTGACATGG	GAGTCCTACAAGGCAAGTGTTTG	60.212	0.478261	CCATGTCAAATGAAAAAGACCAC	60.617	0.391304	101
isoform_136145_13802_1	GAGAGAGAGAGA	GA(2*6)	1727	12	ATTTGGGATGAAATCTTGAGTGAAGAGAAAGCCTTCTT[GAGAGAGAGAGA]ACTTGAAAAAAGGACTAAAAAGGGAGGAGTTGGTCGGTGTGAATTCTTGGCATTACCATAGATCCAAGGCCCAGTGTAGATAAT	ATTTGGGATGAAATCTTGAGTGA	59.828	0.347826	ATTATCTACACTGGGCCTTGGAT	60.108	0.434783	134
isoform_136145_13802_2	GAGAGAGAGAGA	GA(2*6)	1727	12	TCCTATTTGGGATGAAATCTTGAGTGAAGAGAAAGCCTTCTT[GAGAGAGAGAGA]ACTTGAAAAAAGGACTAAAAAGGGAGGAGTTGGTCGGTGTGAATTCTTGGCATTACCATAGATCCAAGGCCCAGTGTAGATAAT	TCCTATTTGGGATGAAATCTTGA	59.795	0.347826	ATTATCTACACTGGGCCTTGGAT	60.108	0.434783	138
isoform_136145_13802_3	GAGAGAGAGAGA	GA(2*6)	1727	12	ATTTGGGATGAAATCTTGAGTGAAGAGAAAGCCTTCTT[GAGAGAGAGAGA]ACTTGAAAAAAGGACTAAAAAGGGAGGAGTTGGTCGGTGTGAATTCTTGGCATTACCATAGATCCAAGGCCCAGTGTAGATAATTTCC	ATTTGGGATGAAATCTTGAGTGA	59.828	0.347826	GGAAATTATCTACACTGGGCCTT	59.765	0.434783	138
isoform_136145_13802_4	GAGAGAGAGAGA	GA(2*6)	1727	12	TCCTATTTGGGATGAAATCTTGAGTGAAGAGAAAGCCTTCTT[GAGAGAGAGAGA]ACTTGAAAAAAGGACTAAAAAGGGAGGAGTTGGTCGGTGTGAATTCTTGGCATTACCATAGATCCAAGGCCCAGTGTAGATAATTTCC	TCCTATTTGGGATGAAATCTTGA	59.795	0.347826	GGAAATTATCTACACTGGGCCTT	59.765	0.434783	142
isoform_136145_13802_5	GAGAGAGAGAGA	GA(2*6)	1727	12	ATTTGGGATGAAATCTTGAGTGAAGAGAAAGCCTTCTT[GAGAGAGAGAGA]ACTTGAAAAAAGGACTAAAAAGGGAGGAGTTGGTCGGTGTGAATTCTTGGCATTACCATAGATCCAAGGCCCAGTGTAGATAATTTCCAATGTGGATGGAACT	ATTTGGGATGAAATCTTGAGTGA	59.828	0.347826	AGTTCCATCCACATTGGAAATTA	59.601	0.347826	153
isoform_136153_13806_2	CAGCAGCAGCAGCAGCAGCAG	CAG(3*7)	1624	21	CAGATCATTTTCTTCAGACCCAAGGACGAGCACCAGCTGCTGTGGGACATGGTACGGCCAGAGACAGCTCAA[CAGCAGCAGCAGCAGCAGCAG]CGGCGGACACGACAACAAGCTCAAT	CAGATCATTTTCTTCAGACCCAA	60.469	0.391304	ATTGAGCTTGTTGTCGTGTCC	60.171	0.47619	118
isoform_136153_13806_4	CAGCAGCAGCAGCAGCAGCAG	CAG(3*7)	1624	21	CAGATCATTTTCTTCAGACCCAAGGACGAGCACCAGCTGCTGTGGGACATGGTACGGCCAGAGACAGCTCAA[CAGCAGCAGCAGCAGCAGCAG]CGGCGGACACGACAACAAGCTCAATG	CAGATCATTTTCTTCAGACCCAA	60.469	0.391304	CATTGAGCTTGTTGTCGTGTC	59.354	0.47619	119
isoform_136153_13806_5	CAGCAGCAGCAGCAGCAGCAG	CAG(3*7)	1624	21	CAGATCATTTTCTTCAGACCCAAGGACGAGCACCAGCTGCTGTGGGACATGGTACGGCCAGAGACAGCTCAA[CAGCAGCAGCAGCAGCAGCAG]CGGCGGACACGACAACAAGCTCAATGGCCACAGCATAGTC	CAGATCATTTTCTTCAGACCCAA	60.469	0.391304	GACTATGCTGTGGCCATTGAG	60.672	0.52381	133
isoform_136248_13820_1	AGAGAGAGAGAGAGAGAGAGAGAGAGAGAGAGAGAGAG	AG(2*19)	1742	38	TTTAGAGTGGAAGACACATGCACAA[AGAGAGAGAGAGAGAGAGAGAGAGAGAGAGAGAGAGAG]GGCATTGCCTACCTACAATCATTGCAATT	TTTAGAGTGGAAGACACATGCAC	59.299	0.434783	AATTGCAATGATTGTAGGTAGGC	59.432	0.391304	92
isoform_136248_13820_2	AGAGAGAGAGAGAGAGAGAGAGAGAGAGAGAGAGAGAG	AG(2*19)	1742	38	TAGAGTGGAAGACACATGCACAA[AGAGAGAGAGAGAGAGAGAGAGAGAGAGAGAGAGAGAG]GGCATTGCCTACCTACAATCATTGCAATT	TAGAGTGGAAGACACATGCACAA	60.736	0.434783	AATTGCAATGATTGTAGGTAGGC	59.432	0.391304	90
isoform_136248_13820_3	AGAGAGAGAGAGAGAGAGAGAGAGAGAGAGAGAGAGAG	AG(2*19)	1742	38	TTAGAGTGGAAGACACATGCACAA[AGAGAGAGAGAGAGAGAGAGAGAGAGAGAGAGAGAGAG]GGCATTGCCTACCTACAATCATTGCAATT	TTAGAGTGGAAGACACATGCACA	60.736	0.434783	AATTGCAATGATTGTAGGTAGGC	59.432	0.391304	91
isoform_136248_13820_4	AGAGAGAGAGAGAGAGAGAGAGAGAGAGAGAGAGAGAG	AG(2*19)	1742	38	TTTAGAGTGGAAGACACATGCACAA[AGAGAGAGAGAGAGAGAGAGAGAGAGAGAGAGAGAGAG]GGCATTGCCTACCTACAATCATTGC	TTTAGAGTGGAAGACACATGCAC	59.299	0.434783	GCAATGATTGTAGGTAGGCAATG	60.734	0.434783	88
isoform_136248_13820_5	AGAGAGAGAGAGAGAGAGAGAGAGAGAGAGAGAGAGAG	AG(2*19)	1742	38	TTTAGAGTGGAAGACACATGCACAA[AGAGAGAGAGAGAGAGAGAGAGAGAGAGAGAGAGAGAG]GGCATTGCCTACCTACAATCATTGCA	TTTAGAGTGGAAGACACATGCAC	59.299	0.434783	TGCAATGATTGTAGGTAGGCAAT	60.734	0.391304	89
isoform_136285_13834_1	CTCTCTCTCTCTCTCTCTCTCTCT	CT(2*12)	388	24	CACTCCGCTTCTAACTACGACTGCCAGTGATATGTCAACAGTAATGATTGCTGGCG[CTCTCTCTCTCTCTCTCTCTCTCT]CGCACAGTTCGGTACAAAATCTATAAACAAGCACTCACACTGCTTGAGCATAGATACTCCTCCCTCTCTTTCCTCTTT	CACTCCGCTTCTAACTACGACTG	60.481	0.521739	AAAGAGGAAAGAGAGGGAGGAGT	60.239	0.478261	158
isoform_136285_13834_3	CTCTCTCTCTCTCTCTCTCTCTCT	CT(2*12)	388	24	CACTCCGCTTCTAACTACGACTGCCAGTGATATGTCAACAGTAATGATTGCTGGCG[CTCTCTCTCTCTCTCTCTCTCTCT]CGCACAGTTCGGTACAAAATCTATAAACAAGCACTCACACTGCTTGAGCATAGATACTCCTCCCTCTCTTTCCTCTT	CACTCCGCTTCTAACTACGACTG	60.481	0.521739	AAGAGGAAAGAGAGGGAGGAGTA	59.047	0.478261	157
isoform_136285_13834_4	CTCTCTCTCTCTCTCTCTCTCTCT	CT(2*12)	388	24	CTTCTAACTACGACTGCCAGTGATATGTCAACAGTAATGATTGCTGGCG[CTCTCTCTCTCTCTCTCTCTCTCT]CGCACAGTTCGGTACAAAATCTATAAACAAGCACTCACACTGCTTGAGCATAGATACTCCTCCCTCTCTTTCCTCTTT	CTTCTAACTACGACTGCCAGTGA	58.735	0.478261	AAAGAGGAAAGAGAGGGAGGAGT	60.239	0.478261	151
isoform_136285_13834_5	CTCTCTCTCTCTCTCTCTCTCTCT	CT(2*12)	388	24	ACTCCGCTTCTAACTACGACTGCCAGTGATATGTCAACAGTAATGATTGCTGGCG[CTCTCTCTCTCTCTCTCTCTCTCT]CGCACAGTTCGGTACAAAATCTATAAACAAGCACTCACACTGCTTGAGCATAGATACTCCTCCCTCTCTTTCCTCTTT	ACTCCGCTTCTAACTACGACTGC	61.291	0.521739	AAAGAGGAAAGAGAGGGAGGAGT	60.239	0.478261	157
isoform_136432_13855_1	TCTCTCTCTCTC	TC(2*6)	640	12	CTTCCTTCCCTCAATGGTAGATTAGTAGTGTCTCACACACCCAAGTTTCTGGTCT[TCTCTCTCTCTC]TTGGATTGTTCCTACGACGTTAAAATCTCTCTCAGAGTCTCTCTCTTCTTCCTCCTCTTTGACC	CTTCCTTCCCTCAATGGTAGATT	59.854	0.434783	GGTCAAAGAGGAGGAAGAAGAGA	60.355	0.478261	131
isoform_136432_13855_2	TCTCTCTCTCTC	TC(2*6)	640	12	CTTCCTTCCCTCAATGGTAGATTAGTAGTGTCTCACACACCCAAGTTTCTGGTCT[TCTCTCTCTCTC]TTGGATTGTTCCTACGACGTTAAAATCTCTCTCAGAGTCTCTCTCTTCTTCCTCCTCTTTGACCTC	CTTCCTTCCCTCAATGGTAGATT	59.854	0.434783	GAGGTCAAAGAGGAGGAAGAAGA	60.355	0.478261	133
isoform_136432_13855_3	TCTCTCTCTCTC	TC(2*6)	640	12	CTTCCTTCCCTCAATGGTAGATTAGTAGTGTCTCACACACCCAAGTTTCTGGTCT[TCTCTCTCTCTC]TTGGATTGTTCCTACGACGTTAAAATCTCTCTCAGAGTCTCTCTCTTCTTCCTCCTCTTTGACCT	CTTCCTTCCCTCAATGGTAGATT	59.854	0.434783	AGGTCAAAGAGGAGGAAGAAGAG	59.537	0.478261	132
isoform_136432_13855_5	TCTCTCTCTCTC	TC(2*6)	640	12	GTGTCTCACACACCCAAGTTTCTGGTCT[TCTCTCTCTCTC]TTGGATTGTTCCTACGACGTTAAAATCTCTCTCAGAGTCTCTCTCTTCTTCCTCCTCTTTGACC	GTGTCTCACACACCCAAGTTTCT	60.496	0.478261	GGTCAAAGAGGAGGAAGAAGAGA	60.355	0.478261	104
isoform_136437_13857_4	GGGGGGGGGGGGGGGGG	G(1*17)	182	17	TTGGAATTGGTACGTTTCTGACTAA[GTGTGTGTGTGTGTGTGTGTGTGTGTGTGTGT]GGGGGGGGGGGGGGGGGTGGCGCATGTGCACGTGTTTGCTTGTCTCCATTGTGTGTGGTGTGTGTGTGCCATAAGCATCCCTTTCGTGATTAAA	TTGGAATTGGTACGTTTCTGACT	59.92	0.391304	TTTAATCACGAAAGGGATGCTTA	59.98	0.347826	151
isoform_136495_13873_3	AGAGAGAGAGAGAGAGAGAGAGAGAGAGAG	AG(2*15)	1216	30	ACCAGGAGTGACAACAGTACAGGCGGGTGGACATACCAGT[AGAGAGAGAGAGAGAGAGAGAGAGAGAGAG]TAGGAGCAAGATGGATATGCAATGGTGATGCTTATTTTCCTTGCATAGGTGGGTGCATATGCCAATGGTGATCGTTATTT	ACCAGGAGTGACAACAGTACAGG	60.508	0.521739	AAATAACGATCACCATTGGCATA	60.442	0.347826	150
isoform_136495_13873_4	AGAGAGAGAGAGAGAGAGAGAGAGAGAGAG	AG(2*15)	1216	30	ACCAGGAGTGACAACAGTACAGGCGGGTGGACATACCAGT[AGAGAGAGAGAGAGAGAGAGAGAGAGAGAG]TAGGAGCAAGATGGATATGCAATGGTGATGCTTATTTTCCTTGCATAGGTG	ACCAGGAGTGACAACAGTACAGG	60.508	0.521739	CACCTATGCAAGGAAAATAAGCA	60.482	0.391304	121
isoform_136495_13874_1	GAGAGAGAGAGAGAGAGAGAGAGAGA	GA(2*13)	1425	26	AGCGGTGATGCTTATTTTCCTATGATGTGCAAGCAATAGCCGCAGGCTCGTGGGTAT[GAGAGAGAGAGAGAGAGAGAGAGAGA]CTTTTTAACGTGATAGGAATAATCCCAAGAAGCCTCAAAG	AGCGGTGATGCTTATTTTCCTAT	60.346	0.391304	CTTTGAGGCTTCTTGGGATTATT	59.982	0.391304	123
isoform_136495_13874_2	GAGAGAGAGAGAGAGAGAGAGAGAGA	GA(2*13)	1425	26	AGCGGTGATGCTTATTTTCCTATGATGTGCAAGCAATAGCCGCAGGCTCGTGGGTAT[GAGAGAGAGAGAGAGAGAGAGAGAGA]CTTTTTAACGTGATAGGAATAATCCCAAGAAGCCTCAAAGATATGCAGTG	AGCGGTGATGCTTATTTTCCTAT	60.346	0.391304	CACTGCATATCTTTGAGGCTTCT	59.926	0.434783	133
isoform_136495_13874_3	GAGAGAGAGAGAGAGAGAGAGAGAGA	GA(2*13)	1425	26	AGCGGTGATGCTTATTTTCCTATGATGTGCAAGCAATAGCCGCAGGCTCGTGGGTAT[GAGAGAGAGAGAGAGAGAGAGAGAGA]CTTTTTAACGTGATAGGAATAATCCCAAGAAGCCTCAAAGATATGCAGTGGTGATG	AGCGGTGATGCTTATTTTCCTAT	60.346	0.391304	CATCACCACTGCATATCTTTGAG	59.646	0.434783	139
isoform_136495_13874_4	GAGAGAGAGAGAGAGAGAGAGAGAGA	GA(2*13)	1425	26	AGCGGTGATGCTTATTTTCCTATGATGTGCAAGCAATAGCCGCAGGCTCGTGGGTAT[GAGAGAGAGAGAGAGAGAGAGAGAGA]CTTTTTAACGTGATAGGAATAATCCCAAGAAGCCTCAAAGATATGCAGTGGTGAT	AGCGGTGATGCTTATTTTCCTAT	60.346	0.391304	ATCACCACTGCATATCTTTGAGG	60.387	0.434783	138
isoform_136495_13874_5	GAGAGAGAGAGAGAGAGAGAGAGAGA	GA(2*13)	1425	26	AGCGGTGATGCTTATTTTCCTATGATGTGCAAGCAATAGCCGCAGGCTCGTGGGTAT[GAGAGAGAGAGAGAGAGAGAGAGAGA]CTTTTTAACGTGATAGGAATAATCCCAAGAAGCCTCAAAGATATGCAG	AGCGGTGATGCTTATTTTCCTAT	60.346	0.391304	CTGCATATCTTTGAGGCTTCTTG	60.389	0.434783	131
isoform_136497_13875_1	CACACACACACA	CA(2*6)	246	12	CGATTCTGCTCATCAATCTTACCTGCCTCTCACAGGCTTCCTCACCATAGCATGCACGCACTCC[CACACACACACA]TACCCACCTCCGCTGCATGCTCCCCCTCACTATAACACAGCATTT	CGATTCTGCTCATCAATCTTACC	60.109	0.434783	AAATGCTGTGTTATAGTGAGGGG	59.445	0.434783	121
isoform_136497_13875_2	CACACACACACA	CA(2*6)	246	12	CGATTCTGCTCATCAATCTTACCTGCCTCTCACAGGCTTCCTCACCATAGCATGCACGCACTCC[CACACACACACA]TACCCACCTCCGCTGCATGCTCCCCCTCACTATAACACAG	CGATTCTGCTCATCAATCTTACC	60.109	0.434783	CTGTGTTATAGTGAGGGGGAGC	60.019	0.545455	116
isoform_136497_13875_3	CACACACACACA	CA(2*6)	246	12	CGATTCTGCTCATCAATCTTACCTGCCTCTCACAGGCTTCCTCACCATAGCATGCACGCACTCC[CACACACACACA]TACCCACCTCCGCTGCATGCTCCCCCTCACTATAACACAGCATTTACATAAATTCTTGTAGCCCCACCCT	CGATTCTGCTCATCAATCTTACC	60.109	0.434783	AGGGTGGGGCTACAAGAATTTAT	61.217	0.434783	146
isoform_136497_13875_4	CACACACACACA	CA(2*6)	246	12	CCGATTCTGCTCATCAATCTTACCTGCCTCTCACAGGCTTCCTCACCATAGCATGCACGCACTCC[CACACACACACA]TACCCACCTCCGCTGCATGCTCCCCCTCACTATAACACAGCATTTACATAAATTCTTGTAGCCCCACCCT	CCGATTCTGCTCATCAATCTTAC	60.109	0.434783	AGGGTGGGGCTACAAGAATTTAT	61.217	0.434783	147
isoform_136497_13875_5	CACACACACACA	CA(2*6)	246	12	ATCAATCTTACCTGCCTCTCACAGGCTTCCTCACCATAGCATGCACGCACTCC[CACACACACACA]TACCCACCTCCGCTGCATGCTCCCCCTCACTATAACACAGCATTTACATAAATTCTTGTAGCCCCACCCT	ATCAATCTTACCTGCCTCTCACA	60.144	0.434783	AGGGTGGGGCTACAAGAATTTAT	61.217	0.434783	135
isoform_136497_13876_1	CTCTCTCTCTCTCT	CT(2*7)	334	14	ACATAAATTCTTGTAGCCCCACCCTCTCTCC[CTCTCTCTCTCTCT]CACTCTGAGCGTCCCGTGCTTCCAACATTGAATGGAGCAATGCACACCCCCCGCTCATCGCCTCTCCAGTCCAGAGTCCAGCTCCTCAAGCTGCCCTTCCTCCTCTACCGATGAG	ACATAAATTCTTGTAGCCCCACC	60.467	0.434783	CTCATCGGTAGAGGAGGAAGG	60.211	0.571429	160
isoform_136497_13876_2	CTCTCTCTCTCTCT	CT(2*7)	334	14	ATAAATTCTTGTAGCCCCACCCTCTCTCC[CTCTCTCTCTCTCT]CACTCTGAGCGTCCCGTGCTTCCAACATTGAATGGAGCAATGCACACCCCCCGCTCATCGCCTCTCCAGTCCAGAGTCCAGCTCCTCAAGCTGCCCTTCCTCCTCTACCGATGAGTC	ATAAATTCTTGTAGCCCCACCCT	61.217	0.434783	GACTCATCGGTAGAGGAGGAAG	59.346	0.545455	160
isoform_136497_13876_3	CTCTCTCTCTCTCT	CT(2*7)	334	14	ATAAATTCTTGTAGCCCCACCCTCTCTCC[CTCTCTCTCTCTCT]CACTCTGAGCGTCCCGTGCTTCCAACATTGAATGGAGCAATGCACACCCCCCGCTCATCGCCTCTCCAGTCCAGAGTCCAGCTCCTCAAGCTGCCCTTCCTCCTCTACCGATGAGTC	ATAAATTCTTGTAGCCCCACCC	60.424	0.454545	GACTCATCGGTAGAGGAGGAAG	59.346	0.545455	160
isoform_136497_13876_4	CTCTCTCTCTCTCT	CT(2*7)	334	14	ATAAATTCTTGTAGCCCCACCCTCTCTCC[CTCTCTCTCTCTCT]CACTCTGAGCGTCCCGTGCTTCCAACATTGAATGGAGCAATGCACACCCCCCGCTCATCGCCTCTCCAGTCCAGAGTCCAGCTCCTCAAGCTGCCCTTCCTCCTCTACCGATGAGT	ATAAATTCTTGTAGCCCCACCCT	61.217	0.434783	ACTCATCGGTAGAGGAGGAAGG	60.984	0.545455	159
isoform_136497_13876_5	CTCTCTCTCTCTCT	CT(2*7)	334	14	CATAAATTCTTGTAGCCCCACCCTCTCTCC[CTCTCTCTCTCTCT]CACTCTGAGCGTCCCGTGCTTCCAACATTGAATGGAGCAATGCACACCCCCCGCTCATCGCCTCTCCAGTCCAGAGTCCAGCTCCTCAAGCTGCCCTTCCTCCTCTACCGATGAGT	CATAAATTCTTGTAGCCCCACC	59.737	0.454545	ACTCATCGGTAGAGGAGGAAGG	60.984	0.545455	160
isoform_136513_13881_1	CTCTCTCTCTCTCTCTCTCTCTCTCTCT	CT(2*14)	229	28	GCTCATAAACTCGTGGAAGAGAAGAGTGAGCGCGCAGTTTAGGAAGAGCCTAGCTAGGACAGCAAGTCTCTCAA[CTCTCTCTCTCTCTCTCTCTCTCTCTCT]CACAGATATGGCTCTGCATGACATCT	GCTCATAAACTCGTGGAAGAGAA	59.906	0.434783	AGATGTCATGCAGAGCCATATCT	60.138	0.434783	128
isoform_136513_13881_2	CTCTCTCTCTCTCTCTCTCTCTCTCTCT	CT(2*14)	229	28	AAGTGCTCATAAACTCGTGGAAGAGAAGAGTGAGCGCGCAGTTTAGGAAGAGCCTAGCTAGGACAGCAAGTCTCTCAA[CTCTCTCTCTCTCTCTCTCTCTCTCTCT]CACAGATATGGCTCTGCATGACATCT	AAGTGCTCATAAACTCGTGGAAG	59.833	0.434783	AGATGTCATGCAGAGCCATATCT	60.138	0.434783	132
isoform_136513_13881_4	CTCTCTCTCTCTCTCTCTCTCTCTCTCT	CT(2*14)	229	28	AGTGCTCATAAACTCGTGGAAGAGAAGAGTGAGCGCGCAGTTTAGGAAGAGCCTAGCTAGGACAGCAAGTCTCTCAA[CTCTCTCTCTCTCTCTCTCTCTCTCTCT]CACAGATATGGCTCTGCATGACATCT	AGTGCTCATAAACTCGTGGAAGA	60.309	0.434783	AGATGTCATGCAGAGCCATATCT	60.138	0.434783	131
isoform_136513_13881_5	CTCTCTCTCTCTCTCTCTCTCTCTCTCT	CT(2*14)	229	28	AAACTCGTGGAAGAGAAGAGTGAGCGCGCAGTTTAGGAAGAGCCTAGCTAGGACAGCAAGTCTCTCAA[CTCTCTCTCTCTCTCTCTCTCTCTCTCT]CACAGATATGGCTCTGCATGACATCT	AAACTCGTGGAAGAGAAGAGTGA	59.556	0.434783	AGATGTCATGCAGAGCCATATCT	60.138	0.434783	122
isoform_136525_13885_1	CTCTCTCTCTCTCTCTCTCTCTCTCTCT	CT(2*14)	1293	28	ACACTGATCGAGGTGAATCAAAAGGTGGGCGAGCATCGCCATCATCGGCCTCTCC[CTCTCTCTCTCTCTCTCTCTCTCTCTCT]TCCCCCCCCCTCTGCCCAGATCTGCAGGTACTACT	ACACTGATCGAGGTGAATCAAAA	60.899	0.391304	AGTAGTACCTGCAGATCTGGGC	59.801	0.545455	118
isoform_136525_13885_2	CTCTCTCTCTCTCTCTCTCTCTCTCTCT	CT(2*14)	1293	28	ACACTGATCGAGGTGAATCAAAAGGTGGGCGAGCATCGCCATCATCGGCCTCTCC[CTCTCTCTCTCTCTCTCTCTCTCTCTCT]TCCCCCCCCCTCTGCCCAGATCTGCAGGTACTACTCCCTAGCCCATCGAG	ACACTGATCGAGGTGAATCAAAA	60.899	0.391304	CTCGATGGGCTAGGGAGTAGTA	59.762	0.545455	133
isoform_136525_13885_3	CTCTCTCTCTCTCTCTCTCTCTCTCTCT	CT(2*14)	1293	28	CACTGATCGAGGTGAATCAAAAGGTGGGCGAGCATCGCCATCATCGGCCTCTCC[CTCTCTCTCTCTCTCTCTCTCTCTCTCT]TCCCCCCCCCTCTGCCCAGATCTGCAGGTACTACT	CACTGATCGAGGTGAATCAAAAG	61.019	0.434783	AGTAGTACCTGCAGATCTGGGC	59.801	0.545455	117
isoform_136525_13885_4	CTCTCTCTCTCTCTCTCTCTCTCTCTCT	CT(2*14)	1293	28	CACTGATCGAGGTGAATCAAAAGGTGGGCGAGCATCGCCATCATCGGCCTCTCC[CTCTCTCTCTCTCTCTCTCTCTCTCTCT]TCCCCCCCCCTCTGCCCAGATCTGCAGGTACTACTCCCTAGCCCATCGAG	CACTGATCGAGGTGAATCAAAAG	61.019	0.434783	CTCGATGGGCTAGGGAGTAGTA	59.762	0.545455	132
isoform_136525_13885_5	CTCTCTCTCTCTCTCTCTCTCTCTCTCT	CT(2*14)	1293	28	CAGAGATGGATAAGCGACACTGATCGAGGTGAATCAAAAGGTGGGCGAGCATCGCCATCATCGGCCTCTCC[CTCTCTCTCTCTCTCTCTCTCTCTCTCT]TCCCCCCCCCTCTGCCCAGATCTGCAGGTACTACT	CAGAGATGGATAAGCGACACTG	59.898	0.5	AGTAGTACCTGCAGATCTGGGC	59.801	0.545455	134
isoform_136526_13886_1	CACACACACACACACACACACACACA	CA(2*13)	728	26	GGTAGGAATGATTAGACTTGGGCGAT[CACACACACACACACACACACACACA]CGCACCCACGTGGGCAGGTGCATGCACACACACGCAGAGTGCTGGTCGTAGTTTGCTCCTCCCATGGTTGGCACCTTCAAGATAAGAGT	GGTAGGAATGATTAGACTTGGGC	60.212	0.478261	ACTCTTATCTTGAAGGTGCCAAC	58.84	0.434783	141
isoform_136526_13886_2	CACACACACACACACACACACACACA	CA(2*13)	728	26	AAAGGCAATGAGGTAGGAATGATTAGACTTGGGCGAT[CACACACACACACACACACACACACA]CGCACCCACGTGGGCAGGTGCATGCACACACACGCAGAGTGCTGGTCGTAGTTTGCTCCTCCCATGGTTGGCACCTTCAAGATAAGAGT	AAAGGCAATGAGGTAGGAATGAT	60.212	0.391304	ACTCTTATCTTGAAGGTGCCAAC	58.84	0.434783	152
isoform_136526_13886_3	CACACACACACACACACACACACACA	CA(2*13)	728	26	GGTAGGAATGATTAGACTTGGGCGAT[CACACACACACACACACACACACACA]CGCACCCACGTGGGCAGGTGCATGCACACACACGCAGAGTGCTGGTCGTAGTTTGCTCCTCCCATGGTTGGCACCTTCAAGATAAGAGTATG	GGTAGGAATGATTAGACTTGGGC	60.212	0.478261	CATACTCTTATCTTGAAGGTGCCA	59.687	0.416667	144
isoform_136526_13886_4	CACACACACACACACACACACACACA	CA(2*13)	728	26	AAAGGCAATGAGGTAGGAATGATTAGACTTGGGCGAT[CACACACACACACACACACACACACA]CGCACCCACGTGGGCAGGTGCATGCACACACACGCAGAGTGCTGGTCGTAGTTTGCTCCTCCCATGGTTGGCACCTTCAAGATAAGAGTATG	AAAGGCAATGAGGTAGGAATGAT	60.212	0.391304	CATACTCTTATCTTGAAGGTGCCA	59.687	0.416667	155
isoform_136526_13886_5	CACACACACACACACACACACACACA	CA(2*13)	728	26	GGTAGGAATGATTAGACTTGGGCGAT[CACACACACACACACACACACACACA]CGCACCCACGTGGGCAGGTGCATGCACACACACGCAGAGTGCTGGTCGTAGTTTGCTCCTCCCATGGTTGGCACCTTCAAGATAAGAG	GGTAGGAATGATTAGACTTGGGC	60.212	0.478261	CTCTTATCTTGAAGGTGCCAACC	61.327	0.478261	140
isoform_136526_13887_1	TCTCTCTCTCTCTC	TC(2*7)	1668	14	ATAATGGCCCCTTTACCCTATCTTGAGTTATTGTGCTCGCAAGCCTTTTGTCCATCTGTCTCTCT[TCTCTCTCTCTCTC]GCATGTTACTGTCTCTTTCCTCTCTCCTTACGTTGCACACTCTGACATGGTATGAGA	ATAATGGCCCCTTTACCCTATCT	60.282	0.434783	TCTCATACCATGTCAGAGTGTGC	60.194	0.478261	136
isoform_136526_13887_2	TCTCTCTCTCTCTC	TC(2*7)	1668	14	AAATCCCTGTCCTTGTTTAGGAGCATGTCCGCATAATGGCCCCTTTACCCTATCTTGAGTTATTGTGCTCGCAAGCCTTTTGTCCATCTGTCTCTCT[TCTCTCTCTCTCTC]GCATGTTACTGTCTCTTTCCTCTCTCCTTACGTTGCACACTC	AAATCCCTGTCCTTGTTTAGGAG	59.888	0.434783	GAGTGTGCAACGTAAGGAGAGAG	60.482	0.521739	153
isoform_136526_13887_3	TCTCTCTCTCTCTC	TC(2*7)	1668	14	AAATCCCTGTCCTTGTTTAGGAGCATGTCCGCATAATGGCCCCTTTACCCTATCTTGAGTTATTGTGCTCGCAAGCCTTTTGTCCATCTGTCTCTCT[TCTCTCTCTCTCTC]GCATGTTACTGTCTCTTTCCTCTCTCCTTACGTTGCACACTCT	AAATCCCTGTCCTTGTTTAGGAG	59.888	0.434783	AGAGTGTGCAACGTAAGGAGAGA	60.482	0.478261	154
isoform_136526_13887_4	TCTCTCTCTCTCTC	TC(2*7)	1668	14	ATAATGGCCCCTTTACCCTATCTTGAGTTATTGTGCTCGCAAGCCTTTTGTCCATCTGTCTCTCT[TCTCTCTCTCTCTC]GCATGTTACTGTCTCTTTCCTCTCTCCTTACGTTGCACACTCT	ATAATGGCCCCTTTACCCTATCT	60.282	0.434783	AGAGTGTGCAACGTAAGGAGAGA	60.482	0.478261	122
isoform_136526_13887_5	TCTCTCTCTCTCTC	TC(2*7)	1668	14	AAGCCTTTTGTCCATCTGTCTCTCT[TCTCTCTCTCTCTC]GCATGTTACTGTCTCTTTCCTCTCTCCTTACGTTGCACACTCTGACATGGTATGAGA	AAGCCTTTTGTCCATCTGTCTCT	60.649	0.434783	TCTCATACCATGTCAGAGTGTGC	60.194	0.478261	96
isoform_13653_2685_1	GAGAGAGAGAGA	GA(2*6)	157	12	GTGACCGACCTAGGTATAGGGAGGAGAGAG[GAGAGAGAGAGA]GCTTTCTCTCTCTGCTACTAGGGATTTCTACTTGTATGATGTCGCGGCACAGCGGTTCGGAGAACAAGCAAGCGCTCTGTTGTGCATTAGCAGAGCATATC	GTGACCGACCTAGGTATAGGGAG	60.261	0.565217	GATATGCTCTGCTAATGCACAAC	58.94	0.434783	143
isoform_13653_2685_2	GAGAGAGAGAGA	GA(2*6)	157	12	CGACCTAGGTATAGGGAGGAGAGAG[GAGAGAGAGAGA]GCTTTCTCTCTCTGCTACTAGGGATTTCTACTTGTATGATGTCGCGGCACAGCGGTTCGGAGAACAAGCAAGCGCTCTGTTGTGCATTAGCAGAGCATATC	CGACCTAGGTATAGGGAGGAGAG	59.659	0.565217	GATATGCTCTGCTAATGCACAAC	58.94	0.434783	138
isoform_13653_2685_3	GAGAGAGAGAGA	GA(2*6)	157	12	GTGACCGACCTAGGTATAGGGAGGAGAGAG[GAGAGAGAGAGA]GCTTTCTCTCTCTGCTACTAGGGATTTCTACTTGTATGATGTCGCGG	GTGACCGACCTAGGTATAGGGAG	60.261	0.565217	CCGCGACATCATACAAGTAGAA	60.152	0.454545	89
isoform_13653_2685_4	GAGAGAGAGAGA	GA(2*6)	157	12	CGACCTAGGTATAGGGAGGAGAGAG[GAGAGAGAGAGA]GCTTTCTCTCTCTGCTACTAGGGATTTCTACTTGTATGATGTCGCGG	CGACCTAGGTATAGGGAGGAGAG	59.659	0.565217	CCGCGACATCATACAAGTAGAA	60.152	0.454545	84
isoform_13653_2685_5	GAGAGAGAGAGA	GA(2*6)	157	12	GTGACCGACCTAGGTATAGGGAGGAGAGAG[GAGAGAGAGAGA]GCTTTCTCTCTCTGCTACTAGGGATTTCTACTTGTATGATGTCGCGG	GTGACCGACCTAGGTATAGGGAG	60.261	0.565217	CCGCGACATCATACAAGTAGAAA	61.36	0.434783	89
isoform_136576_13889_3	CTCTCTCTCTCTCTCTCTCT	CT(2*10)	266	20	ATGGATCTTCCTCTCTGCAGTCGGTTGCTCTGCCTACGAACGAGCCGGGCG[CTCTCTCTCTCTCTCTCTCT]CCCCCCCACCCCAAATCGCTTGCGAGCGTACGAGCCGGACTGTCCGACCCTGGCATGCAGTAGCACCACATCCCATAGAGGAGCTCTT	ATGGATCTTCCTCTCTGCAGTC	59.846	0.5	AAGAGCTCCTCTATGGGATGTG	59.735	0.5	159
isoform_136576_13889_4	CTCTCTCTCTCTCTCTCTCT	CT(2*10)	266	20	ATGGATCTTCCTCTCTGCAGTCGGTTGCTCTGCCTACGAACGAGCCGGGCG[CTCTCTCTCTCTCTCTCTCT]CCCCCCCACCCCAAATCGCTTGCGAGCGTACGAGCCGGACTGTCCGACCCTGGCATGCAGTAGCACCACATCCCATAGAGGAGCTCTTG	ATGGATCTTCCTCTCTGCAGTC	59.846	0.5	CAAGAGCTCCTCTATGGGATGT	59.735	0.5	160
isoform_136577_13890_1	GAGAGAGAGAGAGAGAGAGAGAGAGAGAGAGAGAGA	GA(2*18)	236	36	GCTCAAAAATTCTGAAGGACCTATATTACTCAGTAATATTAACTTGACTAT[GAGAGAGAGAGAGAGAGAGAGAGAGAGAGAGAGAGA]AGAGGGATATTTAACGTACTGGTAACAATGCCAAG	GCTCAAAAATTCTGAAGGACCTA	58.941	0.391304	CTTGGCATTGTTACCAGTACGTT	60.333	0.434783	122
isoform_136577_13890_2	GAGAGAGAGAGAGAGAGAGAGAGAGAGAGAGAGAGA	GA(2*18)	236	36	TAGCTCAAAAATTCTGAAGGACCTATATTACTCAGTAATATTAACTTGACTAT[GAGAGAGAGAGAGAGAGAGAGAGAGAGAGAGAGAGA]AGAGGGATATTTAACGTACTGGTAACAATGCCAAG	TAGCTCAAAAATTCTGAAGGACC	58.941	0.391304	CTTGGCATTGTTACCAGTACGTT	60.333	0.434783	124
isoform_136577_13890_3	GAGAGAGAGAGAGAGAGAGAGAGAGAGAGAGAGAGA	GA(2*18)	236	36	AGCTCAAAAATTCTGAAGGACCTATATTACTCAGTAATATTAACTTGACTAT[GAGAGAGAGAGAGAGAGAGAGAGAGAGAGAGAGAGA]AGAGGGATATTTAACGTACTGGTAACAATGCCAAG	AGCTCAAAAATTCTGAAGGACCTA	59.806	0.375	CTTGGCATTGTTACCAGTACGTT	60.333	0.434783	123
isoform_136577_13890_4	GAGAGAGAGAGAGAGAGAGAGAGAGAGAGAGAGAGA	GA(2*18)	236	36	CTAGCTCAAAAATTCTGAAGGACCTATATTACTCAGTAATATTAACTTGACTAT[GAGAGAGAGAGAGAGAGAGAGAGAGAGAGAGAGAGA]AGAGGGATATTTAACGTACTGGTAACAATGCCAAG	CTAGCTCAAAAATTCTGAAGGACC	59.806	0.416667	CTTGGCATTGTTACCAGTACGTT	60.333	0.434783	125
isoform_136577_13890_5	GAGAGAGAGAGAGAGAGAGAGAGAGAGAGAGAGAGA	GA(2*18)	236	36	GCTCAAAAATTCTGAAGGACCTATATTACTCAGTAATATTAACTTGACTAT[GAGAGAGAGAGAGAGAGAGAGAGAGAGAGAGAGAGA]AGAGGGATATTTAACGTACTGGTAACAATGCCAAGAGACCTCAAAGATCTGTC	GCTCAAAAATTCTGAAGGACCTA	58.941	0.391304	GACAGATCTTTGAGGTCTCTTGG	59.379	0.478261	140
isoform_136577_13891_1	GAGAGAGAGAGAGAGAGAGAGAGAGAGAGAGAGAGAGAGAGAGAGAGAGAGA	GA(2*26)	343	52	AACGTACTGGTAACAATGCCAAGAGACCTCAAAGATCTGTCTCATAGACCTGACTATGT[GAGAGAGAGAGAGAGAGAGAGAGAGAGAGAGAGAGAGAGAGAGAGAGAGAGA]ACTGTGCCAAAAATCAAAATGGACTTGGAA	AACGTACTGGTAACAATGCCAAG	60.333	0.434783	TTCCAAGTCCATTTTGATTTTTG	60.2	0.304348	141
isoform_136577_13891_2	GAGAGAGAGAGAGAGAGAGAGAGAGAGAGAGAGAGAGAGAGAGAGAGAGAGA	GA(2*26)	343	52	TAACGTACTGGTAACAATGCCAAGAGACCTCAAAGATCTGTCTCATAGACCTGACTATGT[GAGAGAGAGAGAGAGAGAGAGAGAGAGAGAGAGAGAGAGAGAGAGAGAGAGA]ACTGTGCCAAAAATCAAAATGGACTTGGAA	TAACGTACTGGTAACAATGCCAA	59.476	0.391304	TTCCAAGTCCATTTTGATTTTTG	60.2	0.304348	142
isoform_136577_13891_3	GAGAGAGAGAGAGAGAGAGAGAGAGAGAGAGAGAGAGAGAGAGAGAGAGAGA	GA(2*26)	343	52	TTAACGTACTGGTAACAATGCCAAGAGACCTCAAAGATCTGTCTCATAGACCTGACTATGT[GAGAGAGAGAGAGAGAGAGAGAGAGAGAGAGAGAGAGAGAGAGAGAGAGAGA]ACTGTGCCAAAAATCAAAATGGACTTGGAA	TTAACGTACTGGTAACAATGCCA	59.476	0.391304	TTCCAAGTCCATTTTGATTTTTG	60.2	0.304348	143
isoform_136577_13891_4	GAGAGAGAGAGAGAGAGAGAGAGAGAGAGAGAGAGAGAGAGAGAGAGAGAGA	GA(2*26)	343	52	GTAACAATGCCAAGAGACCTCAAAGATCTGTCTCATAGACCTGACTATGT[GAGAGAGAGAGAGAGAGAGAGAGAGAGAGAGAGAGAGAGAGAGAGAGAGAGA]ACTGTGCCAAAAATCAAAATGGACTTGGAA	GTAACAATGCCAAGAGACCTCAA	60.528	0.434783	TTCCAAGTCCATTTTGATTTTTG	60.2	0.304348	132
isoform_136579_13894_1	GTGTGTGTGTGTGTGT	GT(2*8)	443	16	CGGGTCTGAAACATTGTAACGTACTTGTTGTCTTTACTTATTCTTTCCATCAGAATACTACTATATGTATGCATGTACATGTGTGTGCGTGTGCGTGTGCGTGCGCGC[GTGTGTGTGTGTGTGT]GAACACACTTCCTTCCAAGGGAGGTCTAAAGACAT	CGGGTCTGAAACATTGTAACGTA	61.138	0.434783	ATGTCTTTAGACCTCCCTTGGAA	60.347	0.434783	159
isoform_136579_13894_2	GTGTGTGTGTGTGTGT	GT(2*8)	443	16	CGGGTCTGAAACATTGTAACGTACTTGTTGTCTTTACTTATTCTTTCCATCAGAATACTACTATATGTATGCATGTACATGTGTGTGCGTGTGCGTGTGCGTGCGCGC[GTGTGTGTGTGTGTGT]GAACACACTTCCTTCCAAGGGAGGTCTAAAGACA	CGGGTCTGAAACATTGTAACGTA	61.138	0.434783	TGTCTTTAGACCTCCCTTGGAA	60.102	0.454545	158
isoform_136579_13894_3	GTGTGTGTGTGTGTGT	GT(2*8)	443	16	CGGGTCTGAAACATTGTAACGTACTTGTTGTCTTTACTTATTCTTTCCATCAGAATACTACTATATGTATGCATGTACATGTGTGTGCGTGTGCGTGTGCGTGCGCGC[GTGTGTGTGTGTGTGT]GAACACACTTCCTTCCAAGGGAGGTCTAAAGACAT	CGGGTCTGAAACATTGTAACG	60.405	0.47619	ATGTCTTTAGACCTCCCTTGGAA	60.347	0.434783	159
isoform_136579_13894_4	GTGTGTGTGTGTGTGT	GT(2*8)	443	16	GGGTCTGAAACATTGTAACGTACTTGTTGTCTTTACTTATTCTTTCCATCAGAATACTACTATATGTATGCATGTACATGTGTGTGCGTGTGCGTGTGCGTGCGCGC[GTGTGTGTGTGTGTGT]GAACACACTTCCTTCCAAGGGAGGTCTAAAGACAT	GGGTCTGAAACATTGTAACGTACT	58.57	0.416667	ATGTCTTTAGACCTCCCTTGGAA	60.347	0.434783	158
isoform_136579_13894_5	GTGTGTGTGTGTGTGT	GT(2*8)	443	16	CCGGGTCTGAAACATTGTAACGTACTTGTTGTCTTTACTTATTCTTTCCATCAGAATACTACTATATGTATGCATGTACATGTGTGTGCGTGTGCGTGTGCGTGCGCGC[GTGTGTGTGTGTGTGT]GAACACACTTCCTTCCAAGGGAGGTCTAAAGACAT	CCGGGTCTGAAACATTGTAAC	59.345	0.47619	ATGTCTTTAGACCTCCCTTGGAA	60.347	0.434783	160
isoform_136583_13895_1	CTCTCTCTCTCT	CT(2*6)	446	12	CTAGCAAACCATTCCTATATGCGCCACTTGTATAAAC[CTCTCTCTCTCT]GCGCATTCATGATGGCGATGATACTACTAATGGCAG	CTAGCAAACCATTCCTATATGCG	60.019	0.434783	CTGCCATTAGTAGTATCATCGCC	60.023	0.478261	85
isoform_136583_13895_2	CTCTCTCTCTCT	CT(2*6)	446	12	CTAGCAAACCATTCCTATATGCGCCACTTGTATAAAC[CTCTCTCTCTCT]GCGCATTCATGATGGCGATGATACTACTAATGGCAGGC	CTAGCAAACCATTCCTATATGCG	60.019	0.434783	GCCTGCCATTAGTAGTATCATCG	60.023	0.478261	87
isoform_136583_13895_3	CTCTCTCTCTCT	CT(2*6)	446	12	CTAGCAAACCATTCCTATATGCGCCACTTGTATAAAC[CTCTCTCTCTCT]GCGCATTCATGATGGCGATGATACTACTAATGGCAGGCG	CTAGCAAACCATTCCTATATGCG	60.019	0.434783	CGCCTGCCATTAGTAGTATCATC	60.023	0.478261	88
isoform_136583_13895_4	CTCTCTCTCTCT	CT(2*6)	446	12	CTTATGTCCGTGCTCTAGCAAACCATTCCTATATGCGCCACTTGTATAAAC[CTCTCTCTCTCT]GCGCATTCATGATGGCGATGATACTACTAATGGCAG	CTTATGTCCGTGCTCTAGCAAAC	60.321	0.478261	CTGCCATTAGTAGTATCATCGCC	60.023	0.478261	99
isoform_136583_13895_5	CTCTCTCTCTCT	CT(2*6)	446	12	CTTATGTCCGTGCTCTAGCAAACCATTCCTATATGCGCCACTTGTATAAAC[CTCTCTCTCTCT]GCGCATTCATGATGGCGATGATACTACTAATGGCAGGC	CTTATGTCCGTGCTCTAGCAAAC	60.321	0.478261	GCCTGCCATTAGTAGTATCATCG	60.023	0.478261	101
isoform_136607_13900_1	CAGGCCCAGGCCCAGGCCCAGGCC	CAGGCC(6*4)	577	24	CAAATGTCAGGAGCACTGGATCCCAAT[CAGGCCCAGGCCCAGGCCCAGGCC]CAAGCCCAAGCCCAGGCCCAGGTGCAGGCTCAGGCTCAGGCTCAGCCAGGTGCATCTCAGCAAGCTGTTCAACAAATTCCTGCTAC	CAAATGTCAGGAGCACTGGAT	60.126	0.47619	GTAGCAGGAATTTGTTGAACAGC	60.183	0.434783	137
isoform_136607_13900_2	CAGGCCCAGGCCCAGGCCCAGGCC	CAGGCC(6*4)	577	24	CAAATGTCAGGAGCACTGGATCCCAAT[CAGGCCCAGGCCCAGGCCCAGGCC]CAAGCCCAAGCCCAGGCCCAGGTGCAGGCTCAGGCTCAGGCTCAGCCAGGTGCATCTCAGCAAGCTGTTCAACAAATTCCTGCTACCCAAGTT	CAAATGTCAGGAGCACTGGAT	60.126	0.47619	AACTTGGGTAGCAGGAATTTGTT	60.274	0.391304	144
isoform_136607_13900_3	CAGGCCCAGGCCCAGGCCCAGGCC	CAGGCC(6*4)	577	24	CAAATGTCAGGAGCACTGGATCCCAAT[CAGGCCCAGGCCCAGGCCCAGGCC]CAAGCCCAAGCCCAGGCCCAGGTGCAGGCTCAGGCTCAGGCTCAGCCAGGTGCATCTCAGCAAGCTGTTCAACAAATTCCTGCTACCCAAGTTC	CAAATGTCAGGAGCACTGGAT	60.126	0.47619	GAACTTGGGTAGCAGGAATTTGT	60.735	0.434783	145
isoform_136607_13900_4	CAGGCCCAGGCCCAGGCCCAGGCC	CAGGCC(6*4)	577	24	CAAATGTCAGGAGCACTGGATCCCAAT[CAGGCCCAGGCCCAGGCCCAGGCC]CAAGCCCAAGCCCAGGCCCAGGTGCAGGCTCAGGCTCAGGCTCAGCCAGGTGCATCTCAGCAAGCTGTTCAACAAATT	CAAATGTCAGGAGCACTGGAT	60.126	0.47619	AATTTGTTGAACAGCTTGCTGAG	60.811	0.391304	129
isoform_136607_13900_5	CAGGCCCAGGCCCAGGCCCAGGCC	CAGGCC(6*4)	577	24	CAAATGTCAGGAGCACTGGATCCCAAT[CAGGCCCAGGCCCAGGCCCAGGCC]CAAGCCCAAGCCCAGGCCCAGGTGCAGGCTCAGGCTCAGGCTCAGCCAGGTGCATCTCAGCAAGCTGTTCAACAAATTCCTGCTACCCAAGTTCAG	CAAATGTCAGGAGCACTGGAT	60.126	0.47619	CTGAACTTGGGTAGCAGGAATTT	60.847	0.434783	147
isoform_136622_13903_1	TCTCTCTCTCTCTC	TC(2*7)	1431	14	TTCTAGCTCCTTCCCTCTCTGTTGGCGCACACAACAGCCCAAATGACCAGCCT[TCTCTCTCTCTCTC]GCCAAAGCTCCCGAGCAGCCCCTGTTGCAGCCAGCATAATTCTCAGCCTTCTTTCA	TTCTAGCTCCTTCCCTCTCTGTT	60.029	0.478261	TGAAAGAAGGCTGAGAATTATGC	59.877	0.391304	123
isoform_136622_13903_2	TCTCTCTCTCTCTC	TC(2*7)	1431	14	CTTCTAGCTCCTTCCCTCTCTGTTGGCGCACACAACAGCCCAAATGACCAGCCT[TCTCTCTCTCTCTC]GCCAAAGCTCCCGAGCAGCCCCTGTTGCAGCCAGCATAATTCTCAGCCTTCTTTCA	CTTCTAGCTCCTTCCCTCTCTGT	59.688	0.521739	TGAAAGAAGGCTGAGAATTATGC	59.877	0.391304	124
isoform_136622_13903_3	TCTCTCTCTCTCTC	TC(2*7)	1431	14	CCATGTGGATAGCTAAAAGGAGAGGTAGCGCTGGCTTCTAGCTCCTTCCCTCTCTGTTGGCGCACACAACAGCCCAAATGACCAGCCT[TCTCTCTCTCTCTC]GCCAAAGCTCCCGAGCAGCCCCTGTTGCAGCCAGCATAATTCTCAGCCTTCTTTCA	CCATGTGGATAGCTAAAAGGAGA	59.638	0.434783	TGAAAGAAGGCTGAGAATTATGC	59.877	0.391304	158
isoform_136622_13903_4	TCTCTCTCTCTCTC	TC(2*7)	1431	14	TTCTAGCTCCTTCCCTCTCTGTTGGCGCACACAACAGCCCAAATGACCAGCCT[TCTCTCTCTCTCTC]GCCAAAGCTCCCGAGCAGCCCCTGTTGCAGCCAGCATAATTCTCAGCCTTCTTT	TTCTAGCTCCTTCCCTCTCTGTT	60.029	0.478261	AAAGAAGGCTGAGAATTATGCTG	59.091	0.391304	121
isoform_136622_13903_5	TCTCTCTCTCTCTC	TC(2*7)	1431	14	TTCTAGCTCCTTCCCTCTCTGTTGGCGCACACAACAGCCCAAATGACCAGCCT[TCTCTCTCTCTCTC]GCCAAAGCTCCCGAGCAGCCCCTGTTGCAGCCAGCATAATTCTCAGCCTTCTTTCATTTGC	TTCTAGCTCCTTCCCTCTCTGTT	60.029	0.478261	GCAAATGAAAGAAGGCTGAGAAT	61.054	0.391304	128
isoform_136765_13929_5	CTCTCTCTCTCTCTCTCTCT	CT(2*10)	339	20	GATCTTTACGGAGCCCAAGTAATGTACAGGGAGGGGATGGAGTTGTAACTCTCC[CTCTCTCTCTCTCTCTCTCT]CGTGTTTCTTTCCATCTTTTTATCTTTGTGTGTGCATAGCAATCTAAGTCAAGTTTGTTGTTGAAGTTGGTT	GATCTTTACGGAGCCCAAGTAAT	59.886	0.434783	AACCAACTTCAACAACAAACTTGA	59.982	0.333333	146
isoform_136767_13930_3	CTCTCTCTCTCT	CT(2*6)	1688	12	GACTATGAGGAAAGTGGTTGTG[CTCTCTCTCTCT]TGTTAGGTGCAACCAATGGGTTAACCGTGACATATAGATCAGAAATCAGACCCATGTATTTGTGATGTTGGGATGTAGAAGGAATACTGTCCTTAGCTAAGTATGCCTTTGTCAGACG	GACTATGAGGAAAGTGGTTGTGC	60.054	0.478261	CGTCTGACAAAGGCATACTTAGC	60.321	0.478261	152
isoform_136767_13930_4	CTCTCTCTCTCT	CT(2*6)	1688	12	GACTATGAGGAAAGTGGTTGTG[CTCTCTCTCTCT]TGTTAGGTGCAACCAATGGGTTAACCGTGACATATAGATCAGAAATCAGACCCATGTATTTGTGATGTTGGGATGTAGAAGGAATACTGTCCTTAGCTAAGTATGCCTTTGTCAGACGC	GACTATGAGGAAAGTGGTTGTGC	60.054	0.478261	GCGTCTGACAAAGGCATACTTAG	60.321	0.478261	153
isoform_136767_13930_5	CTCTCTCTCTCT	CT(2*6)	1688	12	GACTATGAGGAAAGTGGTTGTG[CTCTCTCTCTCT]TGTTAGGTGCAACCAATGGGTTAACCGTGACATATAGATCAGAAATCAGACCCATGTATTTGTGATGTTGGGAT	GACTATGAGGAAAGTGGTTGTGC	60.054	0.478261	ATCCCAACATCACAAATACATGG	60.716	0.391304	108
isoform_136767_13931_5	GAGAGAGAGAGA	GA(2*6)	1930	12	CCGATCACACTGACTTAGCTCTTTGGTTGGCCATCATGCGATGGCTGTCACACCCCTTGGTGGGTTGAAGCCAGGCGACGCAGC[GAGAGAGAGAGA]CAAGAGACGAGAGAGAGCACATTGGGATGGTGGTCTCAATCAAAGCTT	CCGATCACACTGACTTAGCTCTT	59.957	0.478261	AAGCTTTGATTGAGACCACCAT	60.004	0.409091	144
isoform_13678_2690_1	CTCTCTCTCTCTCT	CT(2*7)	1571	14	GCATAACACAACATTATGCTGGATTCTAAATATGCCCCTGAATAGAAGGATCCCCAACTCCTCTCACTCACTCCCTC[CTCTCTCTCTCTCT]ACTCTCTCCATATTGCATGAGTTGAATGTGTATCC	GCATAACACAACATTATGCTGGA	59.909	0.391304	GGATACACATTCAACTCATGCAA	59.881	0.391304	126
isoform_13678_2690_2	CTCTCTCTCTCTCT	CT(2*7)	1571	14	AAATATGCCCCTGAATAGAAGGATCCCCAACTCCTCTCACTCACTCCCTC[CTCTCTCTCTCTCT]ACTCTCTCCATATTGCATGAGTTGAATGTGTATCC	AAATATGCCCCTGAATAGAAGGA	60.171	0.391304	GGATACACATTCAACTCATGCAA	59.881	0.391304	99
isoform_13678_2690_3	CTCTCTCTCTCTCT	CT(2*7)	1571	14	GCATAACACAACATTATGCTGGATTCTAAATATGCCCCTGAATAGAAGGATCCCCAACTCCTCTCACTCACTCCCTC[CTCTCTCTCTCTCT]ACTCTCTCCATATTGCATGAGTTGA	GCATAACACAACATTATGCTGGA	59.909	0.391304	TCAACTCATGCAATATGGAGAGA	59.722	0.391304	116
isoform_13678_2690_4	CTCTCTCTCTCTCT	CT(2*7)	1571	14	AAATATGCCCCTGAATAGAAGGATCCCCAACTCCTCTCACTCACTCCCTC[CTCTCTCTCTCTCT]ACTCTCTCCATATTGCATGAGTTGA	AAATATGCCCCTGAATAGAAGGA	60.171	0.391304	TCAACTCATGCAATATGGAGAGA	59.722	0.391304	89
isoform_13678_2690_5	CTCTCTCTCTCTCT	CT(2*7)	1571	14	GGATTCTAAATATGCCCCTGAATAGAAGGATCCCCAACTCCTCTCACTCACTCCCTC[CTCTCTCTCTCTCT]ACTCTCTCCATATTGCATGAGTTGAATGTGTATCC	GGATTCTAAATATGCCCCTGAAT	59.586	0.391304	GGATACACATTCAACTCATGCAA	59.881	0.391304	106
isoform_136857_13951_1	CACACACACACACACACACACACA	CA(2*12)	178	24	ACTGACATTCTCACTCAAGCACCAGCAGAGAGACCACGGGGGCAATATCGCGCTTCAACCAC[CACACACACACACACACACACACA]GAGACGTAGAACGCACGCAGGCGCACGACCCTAACACTAAGAGG	ACTGACATTCTCACTCAAGCACC	60.736	0.478261	CCTCTTAGTGTTAGGGTCGTGC	60.185	0.545455	130
isoform_136857_13951_2	CACACACACACACACACACACACA	CA(2*12)	178	24	ACTGACATTCTCACTCAAGCACCAGCAGAGAGACCACGGGGGCAATATCGCGCTTCAACCAC[CACACACACACACACACACACACA]GAGACGTAGAACGCACGCAGGCGCACGACCCTAACACTAAGAGGC	ACTGACATTCTCACTCAAGCACC	60.736	0.478261	GCCTCTTAGTGTTAGGGTCGTG	60.185	0.545455	131
isoform_136857_13951_3	CACACACACACACACACACACACA	CA(2*12)	178	24	CCATTGCTGTGTACTGACATTCTCACTCAAGCACCAGCAGAGAGACCACGGGGGCAATATCGCGCTTCAACCAC[CACACACACACACACACACACACA]GAGACGTAGAACGCACGCAGGCGCACGACCCTAACACTAAGAGG	CCATTGCTGTGTACTGACATTCT	59.183	0.434783	CCTCTTAGTGTTAGGGTCGTGC	60.185	0.545455	142
isoform_136857_13951_4	CACACACACACACACACACACACA	CA(2*12)	178	24	CCATTGCTGTGTACTGACATTCTCACTCAAGCACCAGCAGAGAGACCACGGGGGCAATATCGCGCTTCAACCAC[CACACACACACACACACACACACA]GAGACGTAGAACGCACGCAGGCGCACGACCCTAACACTAAGAGGC	CCATTGCTGTGTACTGACATTCT	59.183	0.434783	GCCTCTTAGTGTTAGGGTCGTG	60.185	0.545455	143
isoform_136857_13951_5	CACACACACACACACACACACACA	CA(2*12)	178	24	TGTACTGACATTCTCACTCAAGCACCAGCAGAGAGACCACGGGGGCAATATCGCGCTTCAACCAC[CACACACACACACACACACACACA]GAGACGTAGAACGCACGCAGGCGCACGACCCTAACACTAAGAGGC	TGTACTGACATTCTCACTCAAGCA	59.98	0.416667	GCCTCTTAGTGTTAGGGTCGTG	60.185	0.545455	134
isoform_136880_13958_4	ACACACACACACACACAC	AC(2*9)	774	18	ATGCCAAAGACTATATGAAGGGGCTAAACCATAGGCGCCATGAATCCTAGAGCTTGATGGATATTATAGCTAAAGAAGCCCTACTCTCTCTCTTGCAT[ACACACACACACACACAC]TAGTAGAAGAATACAAAGGGGAAATCAAAACAAGACAAAGA	ATGCCAAAGACTATATGAAGGGG	60.551	0.434783	TCTTTGTCTTGTTTTGATTTCCC	59.51	0.347826	157
isoform_136908_13961_1	AGAGAGAGAGAGAG	AG(2*7)	559	14	CAGGTGCAATCTAGGACGACTACTCTTCTTTTAAGGGGGGGTATGCCACAAAGTGATGACATGGCAACCTATAAGCAAA[AGAGAGAGAGAGAG]TAGAAGAGAGAGAGTGCTGATGTGGCACATCCGAAAATCGCAACATAGATTAC	CAGGTGCAATCTAGGACGACTAC	60.199	0.521739	GTAATCTATGTTGCGATTTTCGG	59.884	0.391304	146
isoform_136908_13961_2	AGAGAGAGAGAGAG	AG(2*7)	559	14	CAGGTGCAATCTAGGACGACTACTCTTCTTTTAAGGGGGGGTATGCCACAAAGTGATGACATGGCAACCTATAAGCAAA[AGAGAGAGAGAGAG]TAGAAGAGAGAGAGTGCTGATGTGGCACATCCGAAAATCGCAACATAGATTACGG	CAGGTGCAATCTAGGACGACTAC	60.199	0.521739	CCGTAATCTATGTTGCGATTTTC	59.884	0.391304	148
isoform_136908_13961_3	AGAGAGAGAGAGAG	AG(2*7)	559	14	CAGGTGCAATCTAGGACGACTACTCTTCTTTTAAGGGGGGGTATGCCACAAAGTGATGACATGGCAACCTATAAGCAAA[AGAGAGAGAGAGAG]TAGAAGAGAGAGAGTGCTGATGTGGCACATCCGAAAATCGCAACATAGATTACGGA	CAGGTGCAATCTAGGACGACTAC	60.199	0.521739	TCCGTAATCTATGTTGCGATTTT	59.884	0.347826	149
isoform_136908_13961_4	AGAGAGAGAGAGAG	AG(2*7)	559	14	CGACTACTCTTCTTTTAAGGGGGGGTATGCCACAAAGTGATGACATGGCAACCTATAAGCAAA[AGAGAGAGAGAGAG]TAGAAGAGAGAGAGTGCTGATGTGGCACATCCGAAAATCGCAACATAGATTAC	CGACTACTCTTCTTTTAAGGGGG	59.687	0.478261	GTAATCTATGTTGCGATTTTCGG	59.884	0.391304	130
isoform_136908_13961_5	AGAGAGAGAGAGAG	AG(2*7)	559	14	CGACTACTCTTCTTTTAAGGGGGGGTATGCCACAAAGTGATGACATGGCAACCTATAAGCAAA[AGAGAGAGAGAGAG]TAGAAGAGAGAGAGTGCTGATGTGGCACATCCGAAAATCGCAACATAGATTACGG	CGACTACTCTTCTTTTAAGGGGG	59.687	0.478261	CCGTAATCTATGTTGCGATTTTC	59.884	0.391304	132
isoform_136913_13962_1	ACACACACACAC	AC(2*6)	1113	12	AGGACTCCAAAGTGCTCCTAACTAAGATGGGTAGACATTCGAGTCTTTTGCTGGAAAAATAGCGTGACACACACACT[ACACACACACAC]TCGGTGGTGGTATAATTATTCACTTTTCTGCTTTCTACAGAGGCAC	AGGACTCCAAAGTGCTCCTAACT	59.836	0.478261	GTGCCTCTGTAGAAAGCAGAAAA	60.069	0.434783	135
isoform_136913_13962_2	ACACACACACAC	AC(2*6)	1113	12	AGGACTCCAAAGTGCTCCTAACTAAGATGGGTAGACATTCGAGTCTTTTGCTGGAAAAATAGCGTGACACACACACT[ACACACACACAC]TCGGTGGTGGTATAATTATTCACTTTTCTGCTTTCTACAGAGGCA	AGGACTCCAAAGTGCTCCTAACT	59.836	0.478261	TGCCTCTGTAGAAAGCAGAAAAG	60.188	0.434783	134
isoform_136913_13962_4	ACACACACACAC	AC(2*6)	1113	12	TGGGTAGACATTCGAGTCTTTTGCTGGAAAAATAGCGTGACACACACACT[ACACACACACAC]TCGGTGGTGGTATAATTATTCACTTTTCTGCTTTCTACAGAGGCAC	TGGGTAGACATTCGAGTCTTTTG	60.519	0.434783	GTGCCTCTGTAGAAAGCAGAAAA	60.069	0.434783	108
isoform_136914_13963_1	ACACACACACACACACACACACAC	AC(2*12)	977	24	TAGGGGGTGTTTAGGAACCTGTAGCGTCCAGCGCACCTGTGATCTGACCCCACTGTGCAACAACGGGCCTGGGGCCTGATGCACCAACAACACACCACACAACACA[ACACACACACACACACACACACAC]GCATCCCATCACTAGATCCACTTC	TAGGGGGTGTTTAGGAACCTGTA	60.94	0.478261	GAAGTGGATCTAGTGATGGGATG	59.841	0.478261	154
isoform_136914_13963_2	ACACACACACACACACACACACAC	AC(2*12)	977	24	AACAACACACCACACAACACA[ACACACACACACACACACACACAC]GCATCCCATCACTAGATCCACTTCCCTCGCGCGCGCGCAGCGAGAATCCCATATTAAATGGTGTGTAACTCCTTGAGGTTT	AACAACACACCACACAACACAA	59.861	0.409091	AAACCTCAAGGAGTTACACACCA	59.95	0.434783	126
isoform_136914_13963_3	ACACACACACACACACACACACAC	AC(2*12)	977	24	AACAACACACCACACAACACA[ACACACACACACACACACACACAC]GCATCCCATCACTAGATCCACTTCCCTCGCGCGCGCGCAGCGAGAATCCCATATTAAATG	AACAACACACCACACAACACAA	59.861	0.409091	CATTTAATATGGGATTCTCGCTG	59.844	0.391304	105
isoform_136914_13963_4	ACACACACACACACACACACACAC	AC(2*12)	977	24	ATAGGGGGTGTTTAGGAACCTGTAGCGTCCAGCGCACCTGTGATCTGACCCCACTGTGCAACAACGGGCCTGGGGCCTGATGCACCAACAACACACCACACAACACA[ACACACACACACACACACACACAC]GCATCCCATCACTAGATCCACTTC	ATAGGGGGTGTTTAGGAACCTGT	61.157	0.478261	GAAGTGGATCTAGTGATGGGATG	59.841	0.478261	155
isoform_136914_13963_5	ACACACACACACACACACACACAC	AC(2*12)	977	24	GGTGTTTAGGAACCTGTAGCGTCCAGCGCACCTGTGATCTGACCCCACTGTGCAACAACGGGCCTGGGGCCTGATGCACCAACAACACACCACACAACACA[ACACACACACACACACACACACAC]GCATCCCATCACTAGATCCACTTC	GGTGTTTAGGAACCTGTAGCGTC	61.257	0.521739	GAAGTGGATCTAGTGATGGGATG	59.841	0.478261	149
isoform_136962_13969_1	CTCTCTCTCTCTCT	CT(2*7)	168	14	TATTCTCTTGCGAGGACTCTGTCGTCTAGCTTCAGCAC[CTCTCTCTCTCTCT]CGGTGCGAGACTCTGGTCTATATGTTTGGGCTGCTAA	TATTCTCTTGCGAGGACTCTGTC	60.033	0.478261	TTAGCAGCCCAAACATATAGACC	59.553	0.434783	89
isoform_136962_13969_2	CTCTCTCTCTCTCT	CT(2*7)	168	14	CTCATCTATTCTCTTGCGAGGACTCTGTCGTCTAGCTTCAGCAC[CTCTCTCTCTCTCT]CGGTGCGAGACTCTGGTCTATATGTTTGGGCTG	CTCATCTATTCTCTTGCGAGGAC	59.518	0.478261	CAGCCCAAACATATAGACCAGAG	60.028	0.478261	91
isoform_136962_13969_3	CTCTCTCTCTCTCT	CT(2*7)	168	14	CTCTCATCTATTCTCTTGCGAGGACTCTGTCGTCTAGCTTCAGCAC[CTCTCTCTCTCTCT]CGGTGCGAGACTCTGGTCTATATG	CTCTCATCTATTCTCTTGCGAGG	59.645	0.478261	CATATAGACCAGAGTCTCGCACC	60.165	0.521739	84
isoform_136962_13969_4	CTCTCTCTCTCTCT	CT(2*7)	168	14	TCTATTCTCTTGCGAGGACTCTGTCGTCTAGCTTCAGCAC[CTCTCTCTCTCTCT]CGGTGCGAGACTCTGGTCTATATGTTTGGGCTGCTAA	TCTATTCTCTTGCGAGGACTCTG	60.158	0.478261	TTAGCAGCCCAAACATATAGACC	59.553	0.434783	91
isoform_136962_13969_5	CTCTCTCTCTCTCT	CT(2*7)	168	14	TCCTCTCATCTATTCTCTTGCGAGGACTCTGTCGTCTAGCTTCAGCAC[CTCTCTCTCTCTCT]CGGTGCGAGACTCTGGTCTATATG	TCCTCTCATCTATTCTCTTGCGA	60.477	0.434783	CATATAGACCAGAGTCTCGCACC	60.165	0.521739	86
isoform_136962_13970_1	AGAGAGAGAGAG	AG(2*6)	948	12	CCACAGCCTAATTCCTATCTTCCTTCTTTGTATAAAGAAAAAACACTCTTTACAGCTCTATATGGA[AGAGAGAGAGAG]GTCAAGGTTTTCGTGGAAGATGACATTGAGGAGACTGAGATTATCGAGC	CCACAGCCTAATTCCTATCTTCC	60.327	0.478261	GCTCGATAATCTCAGTCTCCTCA	59.997	0.478261	127
isoform_136962_13970_2	AGAGAGAGAGAG	AG(2*6)	948	12	CCACAGCCTAATTCCTATCTTCCTTCTTTGTATAAAGAAAAAACACTCTTTACAGCTCTATATGGA[AGAGAGAGAGAG]GTCAAGGTTTTCGTGGAAGATGACATTGAGGAGACTGAGATTATCGAGCTCA	CCACAGCCTAATTCCTATCTTCC	60.327	0.478261	TGAGCTCGATAATCTCAGTCTCC	59.997	0.478261	130
isoform_136962_13970_3	AGAGAGAGAGAG	AG(2*6)	948	12	CCACAGCCTAATTCCTATCTTCCTTCTTTGTATAAAGAAAAAACACTCTTTACAGCTCTATATGGA[AGAGAGAGAGAG]GTCAAGGTTTTCGTGGAAGATGACATTGAGGAGAC	CCACAGCCTAATTCCTATCTTCC	60.327	0.478261	GTCTCCTCAATGTCATCTTCCAC	59.994	0.478261	113
isoform_136962_13970_4	AGAGAGAGAGAG	AG(2*6)	948	12	AAGATGACCACAGCCTAATTCCTATCTTCCTTCTTTGTATAAAGAAAAAACACTCTTTACAGCTCTATATGGA[AGAGAGAGAGAG]GTCAAGGTTTTCGTGGAAGATGACATTGAGGAGACTGAGATTATCGAGC	AAGATGACCACAGCCTAATTCCT	60.373	0.434783	GCTCGATAATCTCAGTCTCCTCA	59.997	0.478261	134
isoform_136962_13970_5	AGAGAGAGAGAG	AG(2*6)	948	12	AAGATGACCACAGCCTAATTCCTATCTTCCTTCTTTGTATAAAGAAAAAACACTCTTTACAGCTCTATATGGA[AGAGAGAGAGAG]GTCAAGGTTTTCGTGGAAGATGACATTGAGGAGACTGAGATTATCGAGCTCA	AAGATGACCACAGCCTAATTCCT	60.373	0.434783	TGAGCTCGATAATCTCAGTCTCC	59.997	0.478261	137
isoform_136973_13974_2	GAGAGAGAGAGA	GA(2*6)	212	12	GTGTGCATGTGTGTATGTGTGAGCCTGGGTGTGTGGCACCGAGGGGGTATGCGTGTGAAAGTGAGTGCACACGCGCGTGGGGGAGGGAGG[GAGAGAGAGAGA]CAGCGGAGGGAGGGAGGAGCCGAGGTCGTCTGGTAATTTTTGCAATG	GTGTGCATGTGTGTATGTGTGAG	60.009	0.478261	CATTGCAAAAATTACCAGACGAC	60.743	0.391304	149
isoform_136973_13974_3	GAGAGAGAGAGA	GA(2*6)	212	12	GTGTGCATGTGTGTATGTGTGAGCCTGGGTGTGTGGCACCGAGGGGGTATGCGTGTGAAAGTGAGTGCACACGCGCGTGGGGGAGGGAGG[GAGAGAGAGAGA]CAGCGGAGGGAGGGAGGAGCCGAGGTCGTCTGGTAATTTTTGCAATGT	GTGTGCATGTGTGTATGTGTGAG	60.009	0.478261	ACATTGCAAAAATTACCAGACGA	60.743	0.347826	150
isoform_136973_13974_4	GAGAGAGAGAGA	GA(2*6)	212	12	GTGTGCATGTGTGTATGTGTGAGCCTGGGTGTGTGGCACCGAGGGGGTATGCGTGTGAAAGTGAGTGCACACGCGCGTGGGGGAGGGAGG[GAGAGAGAGAGA]CAGCGGAGGGAGGGAGGAGCCGAGGTCGTCTGGTAATTTTTGCAATG	GTGTGCATGTGTGTATGTGTGAG	60.009	0.478261	CATTGCAAAAATTACCAGACGA	60	0.363636	149
isoform_136973_13974_5	GAGAGAGAGAGA	GA(2*6)	212	12	GTGTGCATGTGTGTATGTGTGAGCCTGGGTGTGTGGCACCGAGGGGGTATGCGTGTGAAAGTGAGTGCACACGCGCGTGGGGGAGGGAGG[GAGAGAGAGAGA]CAGCGGAGGGAGGGAGGAGCCGAGGTCGTCTGGTAATTTTTGC	GTGTGCATGTGTGTATGTGTGAG	60.009	0.478261	GCAAAAATTACCAGACGACCTC	60.007	0.454545	145
isoform_136997_13980_1	TCTCTCTCTCTCTCTCTC	TC(2*9)	1799	18	CCGGATACGTACTCCTTCCTATTGTCCATATATAAATTTGTGTATAGTAGGTCGTCGTATAATCATGCCAATAG[TCTCTCTCTCTCTCTCTC]AACCTTGTATAGCCTCTGTATCAGATTACTTGTATCAGGCCCCTATTTACC	CCGGATACGTACTCCTTCCTATT	59.779	0.478261	GGTAAATAGGGGCCTGATACAAG	60.101	0.478261	143
isoform_136997_13980_2	TCTCTCTCTCTCTCTCTC	TC(2*9)	1799	18	GTAGGTCGTCGTATAATCATGCCAATAG[TCTCTCTCTCTCTCTCTC]AACCTTGTATAGCCTCTGTATCAGATTACTTGTATCAGGCCCCTATTTACCATATCCCAACACCCCACTTACCTTTCAAGTAGG	GTAGGTCGTCGTATAATCATGCC	59.776	0.478261	CCTACTTGAAAGGTAAGTGGGGT	59.819	0.478261	130
isoform_136997_13980_3	TCTCTCTCTCTCTCTCTC	TC(2*9)	1799	18	GTAGGTCGTCGTATAATCATGCCAATAG[TCTCTCTCTCTCTCTCTC]AACCTTGTATAGCCTCTGTATCAGATTACTTGTATCAGGCCCCTATTTACCATATCCCAACACCCCACTTACCTTTCAAGTAGGT	GTAGGTCGTCGTATAATCATGCC	59.776	0.478261	ACCTACTTGAAAGGTAAGTGGGG	59.819	0.478261	131
isoform_136997_13980_4	TCTCTCTCTCTCTCTCTC	TC(2*9)	1799	18	GTAGGTCGTCGTATAATCATGCCAATAG[TCTCTCTCTCTCTCTCTC]AACCTTGTATAGCCTCTGTATCAGATTACTTGTATCAGGCCCCTATTTACCATATCCCAACACCCCACTTACCTTTCAAGT	GTAGGTCGTCGTATAATCATGCC	59.776	0.478261	ACTTGAAAGGTAAGTGGGGTGTT	60.187	0.434783	127
isoform_136997_13980_5	TCTCTCTCTCTCTCTCTC	TC(2*9)	1799	18	CCGGATACGTACTCCTTCCTATTGTCCATATATAAATTTGTGTATAGTAGGTCGTCGTATAATCATGCCAATAG[TCTCTCTCTCTCTCTCTC]AACCTTGTATAGCCTCTGTATCAGATTACTTGTATCAGGCCCCTATTTACCAT	CCGGATACGTACTCCTTCCTATT	59.779	0.478261	ATGGTAAATAGGGGCCTGATACA	60.772	0.434783	145
isoform_137006_13981_1	TCTCTCTCTCTCTCTCTCTCTCTCTCTCTCTCTC	TC(2*17)	196	34	GAAATGGTGCAGAGGGATAAAA[TCTCTCTCTCTCTCTCTCTCTCTCTCTCTCTCTC]TTTACACAAACCCCCTCCTTTACACATA	GAAATGGTGCAGAGGGATAAAAT	60.54	0.391304	TATGTGTAAAGGAGGGGGTTTGT	60.829	0.434783	84
isoform_137006_13981_2	TCTCTCTCTCTCTCTCTCTCTCTCTCTCTCTCTC	TC(2*17)	196	34	GAAATGGTGCAGAGGGATAAAA[TCTCTCTCTCTCTCTCTCTCTCTCTCTCTCTCTC]TTTACACAAACCCCCTCCTTTACACATAC	GAAATGGTGCAGAGGGATAAAAT	60.54	0.391304	GTATGTGTAAAGGAGGGGGTTTG	60.829	0.478261	85
isoform_137006_13981_3	TCTCTCTCTCTCTCTCTCTCTCTCTCTCTCTCTC	TC(2*17)	196	34	GAAATGGTGCAGAGGGATAAAA[TCTCTCTCTCTCTCTCTCTCTCTCTCTCTCTCTC]TTTACACAAACCCCCTCCTTTACACATA	GAAATGGTGCAGAGGGATAAAAT	60.54	0.391304	TATGTGTAAAGGAGGGGGTTTG	60.102	0.454545	84
isoform_137006_13981_4	TCTCTCTCTCTCTCTCTCTCTCTCTCTCTCTCTC	TC(2*17)	196	34	AGAAATGGTGCAGAGGGATAAAA[TCTCTCTCTCTCTCTCTCTCTCTCTCTCTCTCTC]TTTACACAAACCCCCTCCTTTACACATA	AGAAATGGTGCAGAGGGATAAA	59.966	0.409091	TATGTGTAAAGGAGGGGGTTTGT	60.829	0.434783	85
isoform_137006_13981_5	TCTCTCTCTCTCTCTCTCTCTCTCTCTCTCTCTC	TC(2*17)	196	34	AGAAATGGTGCAGAGGGATAAAA[TCTCTCTCTCTCTCTCTCTCTCTCTCTCTCTCTC]TTTACACAAACCCCCTCCTTTACACATAC	AGAAATGGTGCAGAGGGATAAA	59.966	0.409091	GTATGTGTAAAGGAGGGGGTTTG	60.829	0.478261	86
isoform_137097_14006_1	GGTTATGGTTATGGTTATGGTTAT	GGTTAT(6*4)	1281	24	TCAACATGCATATGCTCCTTTAGGTACAGAGACTCTCTTCATTATAAATTCTTTGTGTTTTTTAGAATTGTGACTGCATTCACATTGTGCAC[GGTTATGGTTATGGTTATGGTTAT]GGTTACTCTTCCTTCGTGTAGGCA	TCAACATGCATATGCTCCTTTAG	59.288	0.391304	TGCCTACACGAAGGAAGAGTAAC	59.833	0.478261	140
isoform_137097_14006_2	GGTTATGGTTATGGTTATGGTTAT	GGTTAT(6*4)	1281	24	TCAACATGCATATGCTCCTTTAGGTACAGAGACTCTCTTCATTATAAATTCTTTGTGTTTTTTAGAATTGTGACTGCATTCACATTGTGCAC[GGTTATGGTTATGGTTATGGTTAT]GGTTACTCTTCCTTCGTGTAGGCAC	TCAACATGCATATGCTCCTTTAG	59.288	0.391304	GTGCCTACACGAAGGAAGAGTAA	59.833	0.478261	141
isoform_137097_14006_3	GGTTATGGTTATGGTTATGGTTAT	GGTTAT(6*4)	1281	24	AACATGCATATGCTCCTTTAGGTACAGAGACTCTCTTCATTATAAATTCTTTGTGTTTTTTAGAATTGTGACTGCATTCACATTGTGCAC[GGTTATGGTTATGGTTATGGTTAT]GGTTACTCTTCCTTCGTGTAGGCA	AACATGCATATGCTCCTTTAGGT	59.095	0.391304	TGCCTACACGAAGGAAGAGTAAC	59.833	0.478261	138
isoform_137097_14006_4	GGTTATGGTTATGGTTATGGTTAT	GGTTAT(6*4)	1281	24	AACATGCATATGCTCCTTTAGGTACAGAGACTCTCTTCATTATAAATTCTTTGTGTTTTTTAGAATTGTGACTGCATTCACATTGTGCAC[GGTTATGGTTATGGTTATGGTTAT]GGTTACTCTTCCTTCGTGTAGGCAC	AACATGCATATGCTCCTTTAGGT	59.095	0.391304	GTGCCTACACGAAGGAAGAGTAA	59.833	0.478261	139
isoform_137097_14006_5	GGTTATGGTTATGGTTATGGTTAT	GGTTAT(6*4)	1281	24	AACATGCATATGCTCCTTTAGGTACAGAGACTCTCTTCATTATAAATTCTTTGTGTTTTTTAGAATTGTGACTGCATTCACATTGTGCAC[GGTTATGGTTATGGTTATGGTTAT]GGTTACTCTTCCTTCGTGTAGGCA	AACATGCATATGCTCCTTTAGGTA	59.134	0.375	TGCCTACACGAAGGAAGAGTAAC	59.833	0.478261	138
isoform_137100_14007_1	TCCTCCTCCTCCTCC	TCC(3*5)	1756	15	CAGAAGCATGTAGAGGTTCTCCTCT[TCCTCCTCCTCCTCC]TCAATAATCCCTGGCTTTCAAGCTTTTGTGAGAAAAGGGCCATGCTTGAAGGCCAACTGACCCCCCCTCCCCCCTTCTCTTCTTTCCCAAAGAAGCAAGTGAAACTTTTGTGTGG	CAGAAGCATGTAGAGGTTCTCCT	59.068	0.478261	CCACACAAAAGTTTCACTTGCTT	60.588	0.391304	155
isoform_137100_14007_2	TCCTCCTCCTCCTCC	TCC(3*5)	1756	15	CAGAAGCATGTAGAGGTTCTCCTCT[TCCTCCTCCTCCTCC]TCAATAATCCCTGGCTTTCAAGCTTTTGTGAGAAAAGGGCCATGCTTGAAGGCCAACTGACCCCCCCTCCCCCCTTCTCTTCTTTCCCAAAGAAGCAAGTGAAACTTT	CAGAAGCATGTAGAGGTTCTCCT	59.068	0.478261	AAAGTTTCACTTGCTTCTTTGGG	60.975	0.391304	148
isoform_137100_14007_3	TCCTCCTCCTCCTCC	TCC(3*5)	1756	15	CAGAAGCATGTAGAGGTTCTCCTCT[TCCTCCTCCTCCTCC]TCAATAATCCCTGGCTTTCAAGCTTTTGTGAGAAAAGGGCCATGCTTGAAGGCCAACTGACCCCCCCTCCCCCCTTCTCTTCTTTCCCAAAGAAGCAAGTGAAACTTTT	CAGAAGCATGTAGAGGTTCTCCT	59.068	0.478261	AAAAGTTTCACTTGCTTCTTTGG	59.024	0.347826	149
isoform_137100_14007_4	TCCTCCTCCTCCTCC	TCC(3*5)	1756	15	CCAGAAGCATGTAGAGGTTCTCCTCT[TCCTCCTCCTCCTCC]TCAATAATCCCTGGCTTTCAAGCTTTTGTGAGAAAAGGGCCATGCTTGAAGGCCAACTGACCCCCCCTCCCCCCTTCTCTTCTTTCCCAAAGAAGCAAGTGAAACTTTTGTGTGG	CCAGAAGCATGTAGAGGTTCTCC	61.492	0.521739	CCACACAAAAGTTTCACTTGCTT	60.588	0.391304	156
isoform_137100_14007_5	TCCTCCTCCTCCTCC	TCC(3*5)	1756	15	CAGAAGCATGTAGAGGTTCTCCTCT[TCCTCCTCCTCCTCC]TCAATAATCCCTGGCTTTCAAGCTTTTGTGAGAAAAGGGCCATGCTTGAAGGCCAACTGACCCCCCCTCCCCCCTTCTCTTCTTTCCCAAAGAAGCAAGTGAAACTT	CAGAAGCATGTAGAGGTTCTCCT	59.068	0.478261	AAGTTTCACTTGCTTCTTTGGG	59.799	0.409091	147
isoform_137108_14009_3	AGCAGCAGCAGCAGC	AGC(3*5)	252	15	TTTTCAAAGAACCACTAGCATGGCCCAAATAGGGCCTAGCATGGCTGCAATGCCACCTCAGCATCAGAAGACAGCAGCACCCCCATTCTG[AGCAGCAGCAGCAGC]CCATCGCCAAAGGGAGATCTTGAGCATGCTGAGGAGATGATGAAAGAGAT	TTTTCAAAGAACCACTAGCATGG	60.506	0.391304	ATCTCTTTCATCATCTCCTCAGC	58.96	0.434783	155
isoform_137211_14033_1	AGAGAGAGAGAGAGAGAGAGAGAGAGAGAGAGAGAGAGAGAGAGAGAGAGAGAGAGAG	AG(2*29)	622	58	TCTGCTAGAAATCTCCCAAACTGTCGCTGGTCCAGCTCTGTCAGACACTGCC[AGAGAGAGAGAGAGAGAGAGAGAGAGAGAGAGAGAGAGAGAGAGAGAGAGAGAGAGAG]ATGAAATGATATATTAACGTCTTCAAAAGGCCAA	TCTGCTAGAAATCTCCCAAACTG	59.9	0.434783	TTGGCCTTTTGAAGACGTTAATA	60.013	0.347826	144
isoform_137211_14033_2	AGAGAGAGAGAGAGAGAGAGAGAGAGAGAGAGAGAGAGAGAGAGAGAGAGAGAGAGAG	AG(2*29)	622	58	TGCTAGAAATCTCCCAAACTGTCGCTGGTCCAGCTCTGTCAGACACTGCC[AGAGAGAGAGAGAGAGAGAGAGAGAGAGAGAGAGAGAGAGAGAGAGAGAGAGAGAGAG]ATGAAATGATATATTAACGTCTTCAAAAGGCCAA	TGCTAGAAATCTCCCAAACTGTC	59.776	0.434783	TTGGCCTTTTGAAGACGTTAATA	60.013	0.347826	142
isoform_137211_14033_3	AGAGAGAGAGAGAGAGAGAGAGAGAGAGAGAGAGAGAGAGAGAGAGAGAGAGAGAGAG	AG(2*29)	622	58	CCTCTGCTAGAAATCTCCCAAACTGTCGCTGGTCCAGCTCTGTCAGACACTGCC[AGAGAGAGAGAGAGAGAGAGAGAGAGAGAGAGAGAGAGAGAGAGAGAGAGAGAGAGAG]ATGAAATGATATATTAACGTCTTCAAAAGGCCAA	CCTCTGCTAGAAATCTCCCAAAC	60.594	0.478261	TTGGCCTTTTGAAGACGTTAATA	60.013	0.347826	146
isoform_137211_14033_4	AGAGAGAGAGAGAGAGAGAGAGAGAGAGAGAGAGAGAGAGAGAGAGAGAGAGAGAGAG	AG(2*29)	622	58	TCTGCTAGAAATCTCCCAAACTGTCGCTGGTCCAGCTCTGTCAGACACTGCC[AGAGAGAGAGAGAGAGAGAGAGAGAGAGAGAGAGAGAGAGAGAGAGAGAGAGAGAGAG]ATGAAATGATATATTAACGTCTTCAAAAGGCCAAAATGACCTATGAGAC	TCTGCTAGAAATCTCCCAAACTG	59.9	0.434783	GTCTCATAGGTCATTTTGGCCTT	60.707	0.434783	159
isoform_137211_14033_5	AGAGAGAGAGAGAGAGAGAGAGAGAGAGAGAGAGAGAGAGAGAGAGAGAGAGAGAGAG	AG(2*29)	622	58	TGCTAGAAATCTCCCAAACTGTCGCTGGTCCAGCTCTGTCAGACACTGCC[AGAGAGAGAGAGAGAGAGAGAGAGAGAGAGAGAGAGAGAGAGAGAGAGAGAGAGAGAG]ATGAAATGATATATTAACGTCTTCAAAAGGCCAAAATGACCTATGAGAC	TGCTAGAAATCTCCCAAACTGTC	59.776	0.434783	GTCTCATAGGTCATTTTGGCCTT	60.707	0.434783	157
isoform_137256_14039_1	AGAGAGAGAGAGAGAGAGAGAGAGAGAGAGAGAG	AG(2*17)	1893	34	TCTGATTCTGAAAAATGAGGCATAAAAATATATAC[AGAGAGAGAGAGAGAGAGAGAGAGAGAGAGAGAG]CACAGACGAGAAGATTTGAGGTAGAACTACCAAATATTGCAGTCTCTGAATAGCCCAAATGTATATCCAGTGG	TCTGATTCTGAAAAATGAGGCAT	60.089	0.347826	CCACTGGATATACATTTGGGCTA	60.102	0.434783	142
isoform_137256_14039_2	AGAGAGAGAGAGAGAGAGAGAGAGAGAGAGAGAG	AG(2*17)	1893	34	TCTCTGATTCTGAAAAATGAGGCATAAAAATATATAC[AGAGAGAGAGAGAGAGAGAGAGAGAGAGAGAGAG]CACAGACGAGAAGATTTGAGGTAGAACTACCAAATATTGCAGTCTCTGAATAGCCCAAATGTATATCCAGTGG	TCTCTGATTCTGAAAAATGAGGC	59.849	0.391304	CCACTGGATATACATTTGGGCTA	60.102	0.434783	144
isoform_137256_14039_5	AGAGAGAGAGAGAGAGAGAGAGAGAGAGAGAGAG	AG(2*17)	1893	34	CTCTGATTCTGAAAAATGAGGCATAAAAATATATAC[AGAGAGAGAGAGAGAGAGAGAGAGAGAGAGAGAG]CACAGACGAGAAGATTTGAGGTAGAACTACCAAATATTGCAGTCTCTGAATAGCCCAAATGTATATCCAGTGG	CTCTGATTCTGAAAAATGAGGCA	60.726	0.391304	CCACTGGATATACATTTGGGCTA	60.102	0.434783	143
isoform_137260_14040_1	ACCACCACCACCACCACC	ACC(3*6)	177	18	GAGGAATGAGCGTCAGTTCTTTAAACTGGGCGCCCTCTCTG[ACCACCACCACCACCACC]GCAAGGTCACATTCGCACCACTCCACAGCACCCTCAGAGTACAGACGATGACAAGGTAATTGC	GAGGAATGAGCGTCAGTTCTTTA	59.906	0.434783	GCAATTACCTTGTCATCGTCTGT	60.427	0.434783	122
isoform_137260_14040_2	ACCACCACCACCACCACC	ACC(3*6)	177	18	GAGGAATGAGCGTCAGTTCTTTAAACTGGGCGCCCTCTCTG[ACCACCACCACCACCACC]GCAAGGTCACATTCGCACCACTCCACAGCACCCTCAGAGTACAGACGATGACAA	GAGGAATGAGCGTCAGTTCTTTA	59.906	0.434783	TTGTCATCGTCTGTACTCTGAGG	59.41	0.478261	113
isoform_137260_14040_3	ACCACCACCACCACCACC	ACC(3*6)	177	18	GAGGAATGAGCGTCAGTTCTTTAAACTGGGCGCCCTCTCTG[ACCACCACCACCACCACC]GCAAGGTCACATTCGCACCACTCCACAGCACCCTCAGAGTACAGACGATGACAAGG	GAGGAATGAGCGTCAGTTCTTTA	59.906	0.434783	CCTTGTCATCGTCTGTACTCTGA	59.41	0.478261	115
isoform_137260_14040_4	ACCACCACCACCACCACC	ACC(3*6)	177	18	GAGGAATGAGCGTCAGTTCTTTAAACTGGGCGCCCTCTCTG[ACCACCACCACCACCACC]GCAAGGTCACATTCGCACCACTCCACAGCACCCTCAGAGTACAGACGATG	GAGGAATGAGCGTCAGTTCTTTA	59.906	0.434783	CATCGTCTGTACTCTGAGGGTG	59.786	0.545455	109
isoform_137260_14040_5	ACCACCACCACCACCACC	ACC(3*6)	177	18	GAGGAATGAGCGTCAGTTCTTTAAACTGGGCGCCCTCTCTG[ACCACCACCACCACCACC]GCAAGGTCACATTCGCACCACTCCACAGCACCCTCAGAGTACAGACGATGACAAGGT	GAGGAATGAGCGTCAGTTCTTTA	59.906	0.434783	ACCTTGTCATCGTCTGTACTCTGA	60.23	0.458333	116
isoform_137322_14050_1	CTCTCTCTCTCTCTCTCTCTCTCT	CT(2*12)	301	24	CTCCCCCTCCTCCTCTATTTCCATGGCGGCGGCTTCATCTTCGGCAGCACCACCCTCCCTGCTGATCACGCCTTC[CTCTCTCTCTCTCTCTCTCTCTCT]GTGCGATGGCGGTACCTTCAGCAACAGCTTTCTCT	CTCCCCCTCCTCCTCTATTTC	60.393	0.571429	AGAGAAAGCTGTTGCTGAAGGTA	59.725	0.434783	134
isoform_137322_14050_2	CTCTCTCTCTCTCTCTCTCTCTCT	CT(2*12)	301	24	CCCCTCCTCCTCTATTTCCATGGCGGCGGCTTCATCTTCGGCAGCACCACCCTCCCTGCTGATCACGCCTTC[CTCTCTCTCTCTCTCTCTCTCTCT]GTGCGATGGCGGTACCTTCAGCAACAGCTTTCTCT	CCCCTCCTCCTCTATTTCCAT	60.632	0.52381	AGAGAAAGCTGTTGCTGAAGGTA	59.725	0.434783	131
isoform_137322_14050_3	CTCTCTCTCTCTCTCTCTCTCTCT	CT(2*12)	301	24	CTCCCCCTCCTCCTCTATTTCCATGGCGGCGGCTTCATCTTCGGCAGCACCACCCTCCCTGCTGATCACGCCTTC[CTCTCTCTCTCTCTCTCTCTCTCT]GTGCGATGGCGGTACCTTCAGCAACAGCTTTCTCTCGCATGTTCACAATC	CTCCCCCTCCTCCTCTATTTC	60.393	0.571429	GATTGTGAACATGCGAGAGAAAG	61.158	0.434783	149
isoform_137322_14050_4	CTCTCTCTCTCTCTCTCTCTCTCT	CT(2*12)	301	24	CCCCTCCTCCTCTATTTCCATGGCGGCGGCTTCATCTTCGGCAGCACCACCCTCCCTGCTGATCACGCCTTC[CTCTCTCTCTCTCTCTCTCTCTCT]GTGCGATGGCGGTACCTTCAGCAACAGCTTTCTCT	CCCCTCCTCCTCTATTTCCA	60.393	0.55	AGAGAAAGCTGTTGCTGAAGGTA	59.725	0.434783	131
isoform_137322_14050_5	CTCTCTCTCTCTCTCTCTCTCTCT	CT(2*12)	301	24	CTCCCCCTCCTCCTCTATTTCCATGGCGGCGGCTTCATCTTCGGCAGCACCACCCTCCCTGCTGATCACGCCTTC[CTCTCTCTCTCTCTCTCTCTCTCT]GTGCGATGGCGGTACCTTCAGCAACAGCTTTCTCT	CTCCCCCTCCTCCTCTATTTC	60.393	0.571429	AGAGAAAGCTGTTGCTGAAGGT	59.704	0.454545	134
isoform_137354_14056_1	GAGAGAGAGAGAGAGAGAGAGAGAGA	GA(2*13)	267	26	ATTTATTAACCTTCCAAGCTGCCATGGCAGTAAGAGGTATGGACTCGCTGCTCCTTTGAGAAATAGAGCGACTTCTTAACCTGTGAATCCCCCTCCCGAGAT[GAGAGAGAGAGAGAGAGAGAGAGAGA]GGAGAGATGAGGAATATGCGTACG	ATTTATTAACCTTCCAAGCTGCC	59.892	0.391304	CGTACGCATATTCCTCATCTCTC	60.129	0.478261	152
isoform_137354_14056_2	GAGAGAGAGAGAGAGAGAGAGAGAGA	GA(2*13)	267	26	GTCCTCGCATTTATTAACCTTCCAAGCTGCCATGGCAGTAAGAGGTATGGACTCGCTGCTCCTTTGAGAAATAGAGCGACTTCTTAACCTGTGAATCCCCCTCCCGAGAT[GAGAGAGAGAGAGAGAGAGAGAGAGA]GGAGAGATGAGGAATATGCGTACG	GTCCTCGCATTTATTAACCTTCC	60.208	0.434783	CGTACGCATATTCCTCATCTCTC	60.129	0.478261	160
isoform_137354_14056_3	GAGAGAGAGAGAGAGAGAGAGAGAGA	GA(2*13)	267	26	GACTTCTTAACCTGTGAATCCCCCTCCCGAGAT[GAGAGAGAGAGAGAGAGAGAGAGAGA]GGAGAGATGAGGAATATGCGTACG	GACTTCTTAACCTGTGAATCCCC	60.229	0.478261	CGTACGCATATTCCTCATCTCTC	60.129	0.478261	83
isoform_137354_14056_4	GAGAGAGAGAGAGAGAGAGAGAGAGA	GA(2*13)	267	26	GACTTCTTAACCTGTGAATCCCCCTCCCGAGAT[GAGAGAGAGAGAGAGAGAGAGAGAGA]GGAGAGATGAGGAATATGCGTACGCGGAGCAAGTGCGTACCCTTCTCCTTCCGGACGGTATAACTTTCTACATCAGACCAGGCTG	GACTTCTTAACCTGTGAATCCCC	60.229	0.478261	CAGCCTGGTCTGATGTAGAAAGT	59.824	0.478261	144
isoform_137354_14056_5	GAGAGAGAGAGAGAGAGAGAGAGAGA	GA(2*13)	267	26	CAGTAAGAGGTATGGACTCGCTGCTCCTTTGAGAAATAGAGCGACTTCTTAACCTGTGAATCCCCCTCCCGAGAT[GAGAGAGAGAGAGAGAGAGAGAGAGA]GGAGAGATGAGGAATATGCGTACG	CAGTAAGAGGTATGGACTCGCTG	60.321	0.521739	CGTACGCATATTCCTCATCTCTC	60.129	0.478261	125
isoform_137427_14067_1	TGTGTGTGTGTGTG	TG(2*7)	367	14	TGTGGATTAGGTTGTGGATTAGGGTT[TGTGTGTGTGTGTG]TTCGGGTGTGTGGTTGTGTGTCTGCTTGTTTTTCTTTTCACTGTAGGGTGGGTTTCGAGAGTTATTTTGCGGGTGTGTCGTTTTGGTTGTGCGTCGGTTTTTGATGGTTTTGAGCATGT	TGTGGATTAGGTTGTGGATTAGG	60.116	0.434783	ACATGCTCAAAACCATCAAAAAC	60.27	0.347826	159
isoform_137427_14067_2	TGTGTGTGTGTGTG	TG(2*7)	367	14	TGTGGATTAGGTTGTGGATTAGGGTT[TGTGTGTGTGTGTG]TTCGGGTGTGTGGTTGTGTGTCTGCTTGTTTTTCTTTTCACTGTAGGGTGG	TGTGGATTAGGTTGTGGATTAGG	60.116	0.434783	CCACCCTACAGTGAAAAGAAAAA	59.564	0.391304	91
isoform_137427_14067_3	TGTGTGTGTGTGTG	TG(2*7)	367	14	GACTTACGCTTATGTTTGCTCGTAGGTGTGCGTCAAAGTTTTAGGGTTTGTCTTTGAGTGTGCGCGCGTGTGGATTAGGTTGTGGATTAGGGTT[TGTGTGTGTGTGTG]TTCGGGTGTGTGGTTGTGTGTCTGCTTGTTTTTCTTTTCACTGTAGGGTGG	GACTTACGCTTATGTTTGCTCGT	59.867	0.434783	CCACCCTACAGTGAAAAGAAAAA	59.564	0.391304	159
isoform_137427_14067_4	TGTGTGTGTGTGTG	TG(2*7)	367	14	TGTGGATTAGGTTGTGGATTAGGGTT[TGTGTGTGTGTGTG]TTCGGGTGTGTGGTTGTGTGTCTGCTTGTTTTTCTTTTCACTGTAGGGTGGGTTTCGAGAGTTATTTTGCGGGTGTGTCGTTTTGGTTGTGCGTCGGTTTTTGATGGTTTTGAGCATGTT	TGTGGATTAGGTTGTGGATTAGG	60.116	0.434783	AACATGCTCAAAACCATCAAAAA	60.725	0.304348	160
isoform_137427_14067_5	TGTGTGTGTGTGTG	TG(2*7)	367	14	GGATTAGGTTGTGGATTAGGGTT[TGTGTGTGTGTGTG]TTCGGGTGTGTGGTTGTGTGTCTGCTTGTTTTTCTTTTCACTGTAGGGTGG	GGATTAGGTTGTGGATTAGGGTT	59.519	0.434783	CCACCCTACAGTGAAAAGAAAAA	59.564	0.391304	88
isoform_137427_14068_1	CAGCAGCAGCAGCAG	CAG(3*5)	1130	15	ATTGTTTCAGGTGAAGATTGCTCAATTT[CAGCAGCAGCAGCAG]CAACAACAACAGCAACAGCAACAGCAACAACAGCAGCAGCAACAACAGCAGCAACAACAGCAGCAGCAACAGCAACAGCAACTGCAGCAATCAAGTGGCAGTCAAG	ATTGTTTCAGGTGAAGATTGCTC	59.65	0.391304	CTTGACTGCCACTTGATTGCT	60.447	0.47619	149
isoform_137427_14068_2	CAGCAGCAGCAGCAG	CAG(3*5)	1130	15	GCTCATTGTTTCAGGTGAAGATTGCTCAATTT[CAGCAGCAGCAGCAG]CAACAACAACAGCAACAGCAACAGCAACAACAGCAGCAGCAACAACAGCAGCAACAACAGCAGCAGCAACAGCAACAGCAACTGCAGCAATCAAGTGGCAGTCAAG	GCTCATTGTTTCAGGTGAAGATT	59.65	0.391304	CTTGACTGCCACTTGATTGCT	60.447	0.47619	153
isoform_137454_14072_3	AGAGAGAGAGAGAGAGAGAGAGAGAGAGAGAGAGAG	AG(2*18)	863	36	CAAGGAACAATAAGGTGAGTCCAAATATGTATGTGTGGGTGGGTATTGAGAGAGATAGATAGCTGTTTTTTCTCTCAA[AGAGAGAGAGAGAGAGAGAGAGAGAGAGAGAGAGAG]ATTGATTTGGCTTGGCCTTTATCCATAAAAGGGCATCTCTCA	CAAGGAACAATAAGGTGAGTCCA	60.391	0.434783	TGAGAGATGCCCTTTTATGGAT	59.93	0.409091	156
isoform_137454_14072_4	AGAGAGAGAGAGAGAGAGAGAGAGAGAGAGAGAGAG	AG(2*18)	863	36	AGCCAAGGAACAATAAGGTGAGTCCAAATATGTATGTGTGGGTGGGTATTGAGAGAGATAGATAGCTGTTTTTTCTCTCAA[AGAGAGAGAGAGAGAGAGAGAGAGAGAGAGAGAGAG]ATTGATTTGGCTTGGCCTTTATCCATAAAAGGGCATCTCTCA	AGCCAAGGAACAATAAGGTGAGT	60.404	0.434783	TGAGAGATGCCCTTTTATGGAT	59.93	0.409091	159
isoform_137454_14072_5	AGAGAGAGAGAGAGAGAGAGAGAGAGAGAGAGAGAG	AG(2*18)	863	36	CAAGGAACAATAAGGTGAGTCCAAATATGTATGTGTGGGTGGGTATTGAGAGAGATAGATAGCTGTTTTTTCTCTCAA[AGAGAGAGAGAGAGAGAGAGAGAGAGAGAGAGAGAG]ATTGATTTGGCTTGGCCTTTATCCATAAAAGGGCATCTCTCAA	CAAGGAACAATAAGGTGAGTCCA	60.391	0.434783	TTGAGAGATGCCCTTTTATGGAT	61.122	0.391304	157
isoform_137494_14081_1	GTGTGTGTGTGTGTGT	GT(2*8)	807	16	TCCGTACGTGCCTAATGTCTAATGTCCATGTGTC[GTGTGTGTGTGTGTGT]GGTTAGGAAGTATTAAATAGACAAAGAAGCAACACCATCAT	TCCGTACGTGCCTAATGTCTAAT	59.932	0.434783	ATGATGGTGTTGCTTCTTTGTCT	60.054	0.391304	91
isoform_137494_14081_2	GTGTGTGTGTGTGTGT	GT(2*8)	807	16	ATCCGTACGTGCCTAATGTCTAATGTCCATGTGTC[GTGTGTGTGTGTGTGT]GGTTAGGAAGTATTAAATAGACAAAGAAGCAACACCATCAT	ATCCGTACGTGCCTAATGTCTAA	59.932	0.434783	ATGATGGTGTTGCTTCTTTGTCT	60.054	0.391304	92
isoform_137494_14081_3	GTGTGTGTGTGTGTGT	GT(2*8)	807	16	TCCGTACGTGCCTAATGTCTAATGTCCATGTGTC[GTGTGTGTGTGTGTGT]GGTTAGGAAGTATTAAATAGACAAAGAAGCAACACCATCATAAACACTTGA	TCCGTACGTGCCTAATGTCTAAT	59.932	0.434783	TCAAGTGTTTATGATGGTGTTGC	59.919	0.391304	101
isoform_137494_14081_4	GTGTGTGTGTGTGTGT	GT(2*8)	807	16	ATCCGTACGTGCCTAATGTCTAATGTCCATGTGTC[GTGTGTGTGTGTGTGT]GGTTAGGAAGTATTAAATAGACAAAGAAGCAACACCATCATAAACACTTGA	ATCCGTACGTGCCTAATGTCTAA	59.932	0.434783	TCAAGTGTTTATGATGGTGTTGC	59.919	0.391304	102
isoform_137494_14081_5	GTGTGTGTGTGTGTGT	GT(2*8)	807	16	TCCGTACGTGCCTAATGTCTAATGTCCATGTGTC[GTGTGTGTGTGTGTGT]GGTTAGGAAGTATTAAATAGACAAAGAAGCAACACCATCA	TCCGTACGTGCCTAATGTCTAAT	59.932	0.434783	TGATGGTGTTGCTTCTTTGTCTA	59.799	0.391304	90
isoform_137502_14082_4	CTCTCTCTCTCTCTCTCTCTCTCTCT	CT(2*13)	1229	26	ATGAAGACAAGGTTTCAAGAGCACCTGGTC[CTCTCTCTCTCTCTCTCTCTCTCTCT]TTCTTTGTACCATATGAGTTATTTTCTTTCTATATGCATCTTGAGTAATGGTGATGCATGCAAAG	ATGAAGACAAGGTTTCAAGAGCA	60.289	0.391304	CTTTGCATGCATCACCATTACT	60.025	0.409091	121
isoform_137502_14082_5	CTCTCTCTCTCTCTCTCTCTCTCTCT	CT(2*13)	1229	26	CATGAAGACAAGGTTTCAAGAGCACCTGGTC[CTCTCTCTCTCTCTCTCTCTCTCTCT]TTCTTTGTACCATATGAGTTATTTTCTTTCTATATGCATCTTGAGTAATGGTGATGCATGCAAAG	CATGAAGACAAGGTTTCAAGAGC	60.289	0.434783	CTTTGCATGCATCACCATTACT	60.025	0.409091	122
isoform_137512_14084_1	GATTTGATTTGATTTGATTT	GATTT(5*4)	3110	20	ATCTCAATGATCTCCCCTTCTTCGCGTGGATGATCCCGTAAAGATGCCACTTCTCCCTTGAGAGAGA[GATTTGATTTGATTTGATTT]GATATTTACGTCCGCGGGGGGCCAAAATGACCCATGGGACCCTCAAAGTGATATACA	ATCTCAATGATCTCCCCTTCTTC	59.925	0.434783	TGTATATCACTTTGAGGGTCCCA	60.598	0.434783	144
isoform_137512_14084_2	GATTTGATTTGATTTGATTT	GATTT(5*4)	3110	20	GATGGCTTCTTTATCCATCTCAATGATCTCCCCTTCTTCGCGTGGATGATCCCGTAAAGATGCCACTTCTCCCTTGAGAGAGA[GATTTGATTTGATTTGATTT]GATATTTACGTCCGCGGGGGGCCAAAATGACCCATGGGACCCTCAAAGTGATATACA	GATGGCTTCTTTATCCATCTCAA	59.585	0.391304	TGTATATCACTTTGAGGGTCCCA	60.598	0.434783	160
isoform_137512_14084_3	GATTTGATTTGATTTGATTT	GATTT(5*4)	3110	20	TGGCTTCTTTATCCATCTCAATGATCTCCCCTTCTTCGCGTGGATGATCCCGTAAAGATGCCACTTCTCCCTTGAGAGAGA[GATTTGATTTGATTTGATTT]GATATTTACGTCCGCGGGGGGCCAAAATGACCCATGGGACCCTCAAAGTGATATACA	TGGCTTCTTTATCCATCTCAATG	60.445	0.391304	TGTATATCACTTTGAGGGTCCCA	60.598	0.434783	158
isoform_137512_14084_4	GATTTGATTTGATTTGATTT	GATTT(5*4)	3110	20	TTTATCCATCTCAATGATCTCCCCTTCTTCGCGTGGATGATCCCGTAAAGATGCCACTTCTCCCTTGAGAGAGA[GATTTGATTTGATTTGATTT]GATATTTACGTCCGCGGGGGGCCAAAATGACCCATGGGACCCTCAAAGTGATATACA	TTTATCCATCTCAATGATCTCCC	59.283	0.391304	TGTATATCACTTTGAGGGTCCCA	60.598	0.434783	151
isoform_137512_14084_5	GATTTGATTTGATTTGATTT	GATTT(5*4)	3110	20	CATCTCAATGATCTCCCCTTCTTCGCGTGGATGATCCCGTAAAGATGCCACTTCTCCCTTGAGAGAGA[GATTTGATTTGATTTGATTT]GATATTTACGTCCGCGGGGGGCCAAAATGACCCATGGGACCCTCAAAGTGATATACA	CATCTCAATGATCTCCCCTTCTT	60.797	0.434783	TGTATATCACTTTGAGGGTCCCA	60.598	0.434783	145
isoform_137642_14105_1	TGTGTGTGTGTG	TG(2*6)	1424	12	TAGTGATCCCTATCCAAAAGCAAGGAAAGTGTT[TGTGTGTGTGTG]GAAAACCATCAAGTTTCTGGATGATGATTCTCTCCAGCTGTAGAGTGGACAGCGGGGGCTCATATATCCGGCATGAATTTCT	TAGTGATCCCTATCCAAAAGCAA	59.977	0.391304	AGAAATTCATGCCGGATATATGA	59.69	0.347826	127
isoform_137642_14105_2	TGTGTGTGTGTG	TG(2*6)	1424	12	TCTCAATTGATGGGCTATTTGACGGGAGCTTCATTCTAGTAGTGATCCCTATCCAAAAGCAAGGAAAGTGTT[TGTGTGTGTGTG]GAAAACCATCAAGTTTCTGGATGA	TCTCAATTGATGGGCTATTTGAC	60.326	0.391304	TCATCCAGAAACTTGATGGTTTT	59.864	0.347826	108
isoform_137642_14105_3	TGTGTGTGTGTG	TG(2*6)	1424	12	AGGACTCTCAATTGATGGGCTATTTGACGGGAGCTTCATTCTAGTAGTGATCCCTATCCAAAAGCAAGGAAAGTGTT[TGTGTGTGTGTG]GAAAACCATCAAGTTTCTGGATGA	AGGACTCTCAATTGATGGGCTAT	60.342	0.434783	TCATCCAGAAACTTGATGGTTTT	59.864	0.347826	113
isoform_137642_14105_4	TGTGTGTGTGTG	TG(2*6)	1424	12	CTCTCAATTGATGGGCTATTTGACGGGAGCTTCATTCTAGTAGTGATCCCTATCCAAAAGCAAGGAAAGTGTT[TGTGTGTGTGTG]GAAAACCATCAAGTTTCTGGATGA	CTCTCAATTGATGGGCTATTTGA	60.445	0.391304	TCATCCAGAAACTTGATGGTTTT	59.864	0.347826	109
isoform_137642_14105_5	TGTGTGTGTGTG	TG(2*6)	1424	12	ACTCTCAATTGATGGGCTATTTGACGGGAGCTTCATTCTAGTAGTGATCCCTATCCAAAAGCAAGGAAAGTGTT[TGTGTGTGTGTG]GAAAACCATCAAGTTTCTGGATGA	ACTCTCAATTGATGGGCTATTTG	59.515	0.391304	TCATCCAGAAACTTGATGGTTTT	59.864	0.347826	110
isoform_137734_14119_1	CTCTCTCTCTCTCTCTCT	CT(2*9)	347	18	CATGAAGAACACATCCTATGCAGGCCGTGTGAACTTTGGTCGCGTCACGAACGGGC[CTCTCTCTCTCTCTCTCT]CGCTCTCTGTGCGGCTACACCTTGAGCCTAGCGTGGCTGTTGTGGACGGAGGCGGAGGGCCAGAGACTAGGTGGAAGCAGGCT	CATGAAGAACACATCCTATGCAG	59.646	0.434783	AGCCTGCTTCCACCTAGTCTCT	60.93	0.545455	157
isoform_137734_14119_2	CTCTCTCTCTCTCTCTCT	CT(2*9)	347	18	ATGAAGAACACATCCTATGCAGGCCGTGTGAACTTTGGTCGCGTCACGAACGGGC[CTCTCTCTCTCTCTCTCT]CGCTCTCTGTGCGGCTACACCTTGAGCCTAGCGTGGCTGTTGTGGACGGAGGCGGAGGGCCAGAGACTAGGTGGAAGCAGGCT	ATGAAGAACACATCCTATGCAGG	60.387	0.434783	AGCCTGCTTCCACCTAGTCTCT	60.93	0.545455	156
isoform_137734_14119_3	CTCTCTCTCTCTCTCTCT	CT(2*9)	347	18	GACAAGGCTCTGTGTTGATCTTCATGAAGAACACATCCTATGCAGGCCGTGTGAACTTTGGTCGCGTCACGAACGGGC[CTCTCTCTCTCTCTCTCT]CGCTCTCTGTGCGGCTACACCTTGAGCCTAGCGTG	GACAAGGCTCTGTGTTGATCTTC	60.303	0.478261	CACGCTAGGCTCAAGGTGTAG	60.081	0.571429	131
isoform_137734_14119_4	CTCTCTCTCTCTCTCTCT	CT(2*9)	347	18	CATGAAGAACACATCCTATGCAGGCCGTGTGAACTTTGGTCGCGTCACGAACGGGC[CTCTCTCTCTCTCTCTCT]CGCTCTCTGTGCGGCTACACCTTGAGCCTAGCGTGGCTGTTGTGGACGGAGGCGGAGGGCCAGAGACTAGGTGGAAGCAGGC	CATGAAGAACACATCCTATGCAG	59.646	0.434783	GCCTGCTTCCACCTAGTCTCT	60.031	0.571429	156
isoform_137734_14119_5	CTCTCTCTCTCTCTCTCT	CT(2*9)	347	18	CATGAAGAACACATCCTATGCAGGCCGTGTGAACTTTGGTCGCGTCACGAACGGGC[CTCTCTCTCTCTCTCTCT]CGCTCTCTGTGCGGCTACACCTTGAGCCTAGCGTGGCTGTTGTGGACGGAGGCGGAGGGCCAGAGACTAGGTGGAAGCAGGCT	CATGAAGAACACATCCTATGCAG	59.646	0.434783	AGCCTGCTTCCACCTAGTCTC	60.031	0.571429	157
isoform_137747_14123_1	CTCTCTCTCTCTCTCTCTCTCTCTCTCTCT	CT(2*15)	3583	30	ACTCGGCTCATCTCAAATGTAACATTGCCAATGTAATTGTATCCATTATTTCAAGTGCAACTAA[CTCTCTCTCTCTCTCTCTCTCTCTCTCTCT]GCATGGGAACTCGAGGCCTGTTAGTGTGT	ACTCGGCTCATCTCAAATGTAAC	59.672	0.434783	ACACACTAACAGGCCTCGAGTT	60.23	0.5	123
isoform_137747_14123_2	CTCTCTCTCTCTCTCTCTCTCTCTCTCTCT	CT(2*15)	3583	30	TTACTGTTAGGACGTTCACTCGGCTCATCTCAAATGTAACATTGCCAATGTAATTGTATCCATTATTTCAAGTGCAACTAA[CTCTCTCTCTCTCTCTCTCTCTCTCTCTCT]GCATGGGAACTCGAGGCCTGTTAGTGTGT	TTACTGTTAGGACGTTCACTCGG	60.569	0.478261	ACACACTAACAGGCCTCGAGTT	60.23	0.5	140
isoform_137747_14123_3	CTCTCTCTCTCTCTCTCTCTCTCTCTCTCT	CT(2*15)	3583	30	CACTCGGCTCATCTCAAATGTAACATTGCCAATGTAATTGTATCCATTATTTCAAGTGCAACTAA[CTCTCTCTCTCTCTCTCTCTCTCTCTCTCT]GCATGGGAACTCGAGGCCTGTTAGTGTGT	CACTCGGCTCATCTCAAATGTA	60.27	0.454545	ACACACTAACAGGCCTCGAGTT	60.23	0.5	124
isoform_137747_14123_4	CTCTCTCTCTCTCTCTCTCTCTCTCTCTCT	CT(2*15)	3583	30	TGAGCTTTACTGTTAGGACGTTCACTCGGCTCATCTCAAATGTAACATTGCCAATGTAATTGTATCCATTATTTCAAGTGCAACTAA[CTCTCTCTCTCTCTCTCTCTCTCTCTCTCT]GCATGGGAACTCGAGGCCTGTTAGTGTGT	TGAGCTTTACTGTTAGGACGTTCA	60.339	0.416667	ACACACTAACAGGCCTCGAGTT	60.23	0.5	146
isoform_137747_14123_5	CTCTCTCTCTCTCTCTCTCTCTCTCTCTCT	CT(2*15)	3583	30	TTGTATCCATTATTTCAAGTGCAACTAA[CTCTCTCTCTCTCTCTCTCTCTCTCTCTCT]GCATGGGAACTCGAGGCCTGTTAGTGTGTGCGCGTGCGCCCTGTGCATGGGAACCCAAGGCCTGTTACTGTGTGTGTGAGAGAAGGGAGAAGAA	TTGTATCCATTATTTCAAGTGCAAC	59.367	0.32	TTCTTCTCCCTTCTCTCACACAC	59.908	0.478261	152
isoform_137763_14124_1	ACACACACACACACAC	AC(2*8)	838	16	CCATGCATATATGAACAGGCATATAGGCACGCACACACGTACACCACGTGCACGCACGT[ACACACACACACACAC]AGGTAATCAGGCACAGATCTTTATTGAGTGAGAGAGCCTCTCTTAGTTTTCTCTTCAATCTTTACAGGAGTGCCAT	CCATGCATATATGAACAGGCATA	59.73	0.391304	ATGGCACTCCTGTAAAGATTGAA	60.014	0.391304	151
isoform_137763_14124_4	ACACACACACACACAC	AC(2*8)	838	16	CCATGCATATATGAACAGGCATATAGGCACGCACACACGTACACCACGTGCACGCACGT[ACACACACACACACAC]AGGTAATCAGGCACAGATCTTTATTGAGTGAGAGAGCCTCTCTTAGTTTTCTCTTCAATCTTTACAGGAGTGCCA	CCATGCATATATGAACAGGCATA	59.73	0.391304	TGGCACTCCTGTAAAGATTGAA	59.747	0.409091	150
isoform_137792_14128_1	TCTCTCTCTCTCTCTCTCTCTCTCTCTCTCTCTC	TC(2*17)	498	34	CAGAATGTTCTTTTGATCCTTGGGCAGTTCGATCCTAGTAGGCGCACAAACAATGTGAATTTTCTTATGGATCTTTAATAAG[TCTCTCTCTCTCTCTCTCTCTCTCTCTCTCTCTC]GTTTTTGACCAGAAAAGAGGCTGATTTTCCAGTACTTGA	CAGAATGTTCTTTTGATCCTTGG	59.987	0.391304	TCAAGTACTGGAAAATCAGCCTC	59.776	0.434783	155
isoform_137792_14128_2	TCTCTCTCTCTCTCTCTCTCTCTCTCTCTCTCTC	TC(2*17)	498	34	GCAGAATGTTCTTTTGATCCTTGGGCAGTTCGATCCTAGTAGGCGCACAAACAATGTGAATTTTCTTATGGATCTTTAATAAG[TCTCTCTCTCTCTCTCTCTCTCTCTCTCTCTCTC]GTTTTTGACCAGAAAAGAGGCTGATTTTCCAGTACTTGA	GCAGAATGTTCTTTTGATCCTTG	60.122	0.391304	TCAAGTACTGGAAAATCAGCCTC	59.776	0.434783	156
isoform_137792_14128_3	TCTCTCTCTCTCTCTCTCTCTCTCTCTCTCTCTC	TC(2*17)	498	34	CAGAATGTTCTTTTGATCCTTGGGCAGTTCGATCCTAGTAGGCGCACAAACAATGTGAATTTTCTTATGGATCTTTAATAAG[TCTCTCTCTCTCTCTCTCTCTCTCTCTCTCTCTC]GTTTTTGACCAGAAAAGAGGCTGATTTTC	CAGAATGTTCTTTTGATCCTTGG	59.987	0.391304	GAAAATCAGCCTCTTTTCTGGTC	60.584	0.434783	145
isoform_137792_14128_4	TCTCTCTCTCTCTCTCTCTCTCTCTCTCTCTCTC	TC(2*17)	498	34	GCAGAATGTTCTTTTGATCCTTGGGCAGTTCGATCCTAGTAGGCGCACAAACAATGTGAATTTTCTTATGGATCTTTAATAAG[TCTCTCTCTCTCTCTCTCTCTCTCTCTCTCTCTC]GTTTTTGACCAGAAAAGAGGCTGATTTTC	GCAGAATGTTCTTTTGATCCTTG	60.122	0.391304	GAAAATCAGCCTCTTTTCTGGTC	60.584	0.434783	146
isoform_137792_14128_5	TCTCTCTCTCTCTCTCTCTCTCTCTCTCTCTCTC	TC(2*17)	498	34	AGAATGTTCTTTTGATCCTTGGGCAGTTCGATCCTAGTAGGCGCACAAACAATGTGAATTTTCTTATGGATCTTTAATAAG[TCTCTCTCTCTCTCTCTCTCTCTCTCTCTCTCTC]GTTTTTGACCAGAAAAGAGGCTGATTTTCCAGTACTTGA	AGAATGTTCTTTTGATCCTTGGG	60.68	0.391304	TCAAGTACTGGAAAATCAGCCTC	59.776	0.434783	154
isoform_137800_14129_1	CTCTCTCTCTCTCTCTCTCTCTCTCTCTCTCT	CT(2*16)	1084	32	AGGGTGCTTACAAATCACAAGAGACGTGTGAGCGTGCAGGAAA[CTCTCTCTCTCTCTCTCTCTCTCTCTCTCTCT]CCGTCTATCTGCTGTGCGTTTATA	AGGGTGCTTACAAATCACAAGAG	59.703	0.434783	TATAAACGCACAGCAGATAGACG	59.48	0.434783	99
isoform_137800_14129_2	CTCTCTCTCTCTCTCTCTCTCTCTCTCTCTCT	CT(2*16)	1084	32	AGAGGGTTTTCTGAAAGAAGCTGCCATTGGTGCAGTAGCTGGAGGGTGCTTACAAATCACAAGAGACGTGTGAGCGTGCAGGAAA[CTCTCTCTCTCTCTCTCTCTCTCTCTCTCTCT]CCGTCTATCTGCTGTGCGTTTATA	AGAGGGTTTTCTGAAAGAAGCTG	60.396	0.434783	TATAAACGCACAGCAGATAGACG	59.48	0.434783	141
isoform_137800_14129_3	CTCTCTCTCTCTCTCTCTCTCTCTCTCTCTCT	CT(2*16)	1084	32	AGGGTGCTTACAAATCACAAGAGACGTGTGAGCGTGCAGGAAA[CTCTCTCTCTCTCTCTCTCTCTCTCTCTCTCT]CCGTCTATCTGCTGTGCGTTTATATCAATC	AGGGTGCTTACAAATCACAAGAG	59.703	0.434783	GATTGATATAAACGCACAGCAGA	59.292	0.391304	105
isoform_137800_14129_4	CTCTCTCTCTCTCTCTCTCTCTCTCTCTCTCT	CT(2*16)	1084	32	AGGGTGCTTACAAATCACAAGAGACGTGTGAGCGTGCAGGAAA[CTCTCTCTCTCTCTCTCTCTCTCTCTCTCTCT]CCGTCTATCTGCTGTGCGTTTATATCAATCTC	AGGGTGCTTACAAATCACAAGAG	59.703	0.434783	GAGATTGATATAAACGCACAGCA	59.292	0.391304	107
isoform_137800_14129_5	CTCTCTCTCTCTCTCTCTCTCTCTCTCTCTCT	CT(2*16)	1084	32	GGGTGCTTACAAATCACAAGAGACGTGTGAGCGTGCAGGAAA[CTCTCTCTCTCTCTCTCTCTCTCTCTCTCTCT]CCGTCTATCTGCTGTGCGTTTATA	GGGTGCTTACAAATCACAAGAGA	60.528	0.434783	TATAAACGCACAGCAGATAGACG	59.48	0.434783	98
isoform_137863_14147_1	TGTGTGTGTGTGTG	TG(2*7)	978	14	TTCTCGTTAATTTTTGCTGATGCATA[TGTGTGTGTGTGTG]GGTGGTTTGTGCGCCCACTCAGCTCCCGCGTGCTCTGCCTGCAAATGATTGGAGCGCTTGGGGATATTGTGTTGTCACCTCAC	TTCTCGTTAATTTTTGCTGATGC	60.593	0.347826	GTGAGGTGACAACACAATATCCC	60.531	0.478261	123
isoform_137863_14147_2	TGTGTGTGTGTGTG	TG(2*7)	978	14	TTCTCGTTAATTTTTGCTGATGCATA[TGTGTGTGTGTGTG]GGTGGTTTGTGCGCCCACTCAGCTCCCGCGTGCTCTGCCTGCAAATGATTGGAGCGCTTGGGGATATTGTGTTGTCACCTCACC	TTCTCGTTAATTTTTGCTGATGC	60.593	0.347826	GGTGAGGTGACAACACAATATCC	60.531	0.478261	124
isoform_137863_14147_3	TGTGTGTGTGTGTG	TG(2*7)	978	14	TTCTCGTTAATTTTTGCTGATGCATA[TGTGTGTGTGTGTG]GGTGGTTTGTGCGCCCACTCAGCTCCCGCGTGCTCTGCCTGCAAATGATTGGAGCGCTTGGGGATATTGTGTTGTCACCTCACCTC	TTCTCGTTAATTTTTGCTGATGC	60.593	0.347826	GAGGTGAGGTGACAACACAATATC	59.801	0.458333	126
isoform_137863_14147_4	TGTGTGTGTGTGTG	TG(2*7)	978	14	TTCTCGTTAATTTTTGCTGATGCATA[TGTGTGTGTGTGTG]GGTGGTTTGTGCGCCCACTCAGCTCCCGCGTGCTCTGCCTGCAAATGATTGGAGCGCTTGGGGATATTGTGTTGTCACCTCACCTCC	TTCTCGTTAATTTTTGCTGATGC	60.593	0.347826	GGAGGTGAGGTGACAACACAATA	61.203	0.478261	127
isoform_137863_14147_5	TGTGTGTGTGTGTG	TG(2*7)	978	14	TTCTCGTTAATTTTTGCTGATGCATA[TGTGTGTGTGTGTG]GGTGGTTTGTGCGCCCACTCAGCTCCCGCGTGCTCTGCCTGCAAATGATTGGAGCGCTTGGGGATATTGTGTTGTCACCTCA	TTCTCGTTAATTTTTGCTGATGC	60.593	0.347826	TGAGGTGACAACACAATATCCC	59.717	0.454545	122
isoform_137868_14153_1	TCTCTCTCTCTC	TC(2*6)	833	12	TACATAGACACCCACATTGCTTGGGT[TCTCTCTCTCTC]TTTCTCTCTCTCAACAGTGAAGGAGAATTCCCTTGCTCATTTACCTCTTGCACATGATATTAGCGACCCTTA	TACATAGACACCCACATTGCTTG	59.934	0.434783	TAAGGGTCGCTAATATCATGTGC	60.357	0.434783	110
isoform_137868_14153_2	TCTCTCTCTCTC	TC(2*6)	833	12	GGAAGCTTGCTAGAGTCTGTTGACATATGCCAACTCACATGCATGTGATTCAGGACTATACATAGACACCCACATTGCTTGGGT[TCTCTCTCTCTC]TTTCTCTCTCTCAACAGTGAAGGAGAATTCC	GGAAGCTTGCTAGAGTCTGTTGA	60.199	0.478261	GGAATTCTCCTTCACTGTTGAGA	59.743	0.434783	127
isoform_137868_14153_3	TCTCTCTCTCTC	TC(2*6)	833	12	TACATAGACACCCACATTGCTTGGGT[TCTCTCTCTCTC]TTTCTCTCTCTCAACAGTGAAGGAGAATTCCCTTGCTCATTTACCTCTTGCACATGATATTAGCGACCCTTATCATTTACAGAGTGCTATCATAACCTGGTGAATCTCATGTAAGC	TACATAGACACCCACATTGCTTG	59.934	0.434783	GCTTACATGAGATTCACCAGGTT	59.539	0.434783	154
isoform_137868_14153_4	TCTCTCTCTCTC	TC(2*6)	833	12	TACATAGACACCCACATTGCTTGGGT[TCTCTCTCTCTC]TTTCTCTCTCTCAACAGTGAAGGAGAATTCCCTTGCTCATTTACCTCTTGCACATGATATTAGCG	TACATAGACACCCACATTGCTTG	59.934	0.434783	CGCTAATATCATGTGCAAGAGGT	60.522	0.434783	103
isoform_137868_14153_5	TCTCTCTCTCTC	TC(2*6)	833	12	GGAAGCTTGCTAGAGTCTGTTGACATATGCCAACTCACATGCATGTGATTCAGGACTATACATAGACACCCACATTGCTTGGGT[TCTCTCTCTCTC]TTTCTCTCTCTCAACAGTGAAGGAGAATTCCCTTGCTCATTTACCTCTT	GGAAGCTTGCTAGAGTCTGTTGA	60.199	0.478261	AAGAGGTAAATGAGCAAGGGAAT	59.539	0.391304	145
isoform_137879_14163_1	GAGAGAGAGAGAGAGAGAGAGAGAGAGAGAGA	GA(2*16)	418	32	TAGCAACACTCCTCCTGTGTAGCGGCGCTTGCATCACGTTCTGACAGCACGAGAAAGTGGCCCGCT[GAGAGAGAGAGAGAGAGAGAGAGAGAGAGAGA]GCGACGGGTGCGTGGGGGCTATGGGAAACCTACCCCTGCCCCAGCCTCTGCTCTTTGTTC	TAGCAACACTCCTCCTGTGTAGC	60.855	0.521739	GAACAAAGAGCAGAGGCTGG	60.134	0.55	158
isoform_137879_14163_2	GAGAGAGAGAGAGAGAGAGAGAGAGAGAGAGA	GA(2*16)	418	32	TAGCAACACTCCTCCTGTGTAGCGGCGCTTGCATCACGTTCTGACAGCACGAGAAAGTGGCCCGCT[GAGAGAGAGAGAGAGAGAGAGAGAGAGAGAGA]GCGACGGGTGCGTGGGGGCTATGGGAAACCTACCCCTGCCCCAGCCTCTGCTCTTTGTTCC	TAGCAACACTCCTCCTGTGTAGC	60.855	0.521739	GGAACAAAGAGCAGAGGCTG	60.134	0.55	159
isoform_137879_14163_3	GAGAGAGAGAGAGAGAGAGAGAGAGAGAGAGA	GA(2*16)	418	32	TTCTAGCAACACTCCTCCTGTGTAGCGGCGCTTGCATCACGTTCTGACAGCACGAGAAAGTGGCCCGCT[GAGAGAGAGAGAGAGAGAGAGAGAGAGAGAGA]GCGACGGGTGCGTGGGGGCTATGGGAAACCTACCCCT	TTCTAGCAACACTCCTCCTGTGT	60.35	0.478261	AGGGGTAGGTTTCCCATAGC	59.307	0.55	138
isoform_137879_14163_4	GAGAGAGAGAGAGAGAGAGAGAGAGAGAGAGA	GA(2*16)	418	32	TCTAGCAACACTCCTCCTGTGTAGCGGCGCTTGCATCACGTTCTGACAGCACGAGAAAGTGGCCCGCT[GAGAGAGAGAGAGAGAGAGAGAGAGAGAGAGA]GCGACGGGTGCGTGGGGGCTATGGGAAACCTACCCCTGCCCCAGCCTCTGCTCTTTGTTC	TCTAGCAACACTCCTCCTGTGTA	59.063	0.478261	GAACAAAGAGCAGAGGCTGG	60.134	0.55	160
isoform_137879_14163_5	GAGAGAGAGAGAGAGAGAGAGAGAGAGAGAGA	GA(2*16)	418	32	TCTAGCAACACTCCTCCTGTGTAGCGGCGCTTGCATCACGTTCTGACAGCACGAGAAAGTGGCCCGCT[GAGAGAGAGAGAGAGAGAGAGAGAGAGAGAGA]GCGACGGGTGCGTGGGGGCTATGGGAAACCTACCCCTGCCCCAGCCTCTGCTCTTTGTTC	TCTAGCAACACTCCTCCTGTGTAG	60	0.5	GAACAAAGAGCAGAGGCTGG	60.134	0.55	160
isoform_137961_14176_1	AGAGAGAGAGAGAGAG	AG(2*8)	303	16	GTCATGCCCTTTGCATTTAGTAGAGCTCGATCTTAAGTCCGTGTGTTGAGCAAGAC[AGAGAGAGAGAGAGAG]GAGAAAAGAGAAGAGGTTAGAAGCAAGTTTTCGGAGT	GTCATGCCCTTTGCATTTAGTAG	60.036	0.434783	ACTCCGAAAACTTGCTTCTAACC	60.172	0.434783	109
isoform_137961_14176_2	AGAGAGAGAGAGAGAG	AG(2*8)	303	16	GTCATGCCCTTTGCATTTAGTAGAGCTCGATCTTAAGTCCGTGTGTTGAGCAAGAC[AGAGAGAGAGAGAGAG]GAGAAAAGAGAAGAGGTTAGAAGCAAGTTTTCGG	GTCATGCCCTTTGCATTTAGTAG	60.036	0.434783	CCGAAAACTTGCTTCTAACCTCT	60.286	0.434783	106
isoform_137961_14176_3	AGAGAGAGAGAGAGAG	AG(2*8)	303	16	GTCATGCCCTTTGCATTTAGTAGAGCTCGATCTTAAGTCCGTGTGTTGAGCAAGAC[AGAGAGAGAGAGAGAG]GAGAAAAGAGAAGAGGTTAGAAGCAAGTTTTCGGAG	GTCATGCCCTTTGCATTTAGTAG	60.036	0.434783	CTCCGAAAACTTGCTTCTAACCT	60.286	0.434783	108
isoform_137961_14176_4	AGAGAGAGAGAGAGAG	AG(2*8)	303	16	CATGCCCTTTGCATTTAGTAGAGCTCGATCTTAAGTCCGTGTGTTGAGCAAGAC[AGAGAGAGAGAGAGAG]GAGAAAAGAGAAGAGGTTAGAAGCAAGTTTTCGGAGT	CATGCCCTTTGCATTTAGTAGAG	60.154	0.434783	ACTCCGAAAACTTGCTTCTAACC	60.172	0.434783	107
isoform_137961_14176_5	AGAGAGAGAGAGAGAG	AG(2*8)	303	16	GATCTTAAGTCCGTGTGTTGAGCAAGAC[AGAGAGAGAGAGAGAG]GAGAAAAGAGAAGAGGTTAGAAGCAAGTTTTCGGAGT	GATCTTAAGTCCGTGTGTTGAGC	60.186	0.478261	ACTCCGAAAACTTGCTTCTAACC	60.172	0.434783	81
isoform_137970_14178_2	AGAGAGAGAGAG	AG(2*6)	2926	12	GTTTTCTGAGGGTTACCAAAACCGAGCAAGGAAAGTGAGCAGAGGAAAAAAACGAGCA[AGAGAGAGAGAG]TGACTAAAGAAACTCCATGTGAAGCTACAACCAAATAATGTCTTTTAATGCATCTATTATTTGGAGTGCATTCGATTTT	GTTTTCTGAGGGTTACCAAAACC	60.134	0.434783	AAAATCGAATGCACTCCAAATAA	59.864	0.304348	149
isoform_138028_14187_1	TGGTGGTGGTGGTGGTGG	TGG(3*6)	1151	18	CCGGCAATTGAACTTATTTGTAAAACGACAGCAAAATATCAACTACGCTCGAAGCTCAC[TGGTGGTGGTGGTGGTGG]ATGTGTGTTAACCATTATACCTGATCGTATCCTTTCTTGTCATTGCTTTTGTTTTTCACAGGTTTT	CCGGCAATTGAACTTATTTGTAA	60.234	0.347826	AAAACCTGTGAAAAACAAAAGCA	60.063	0.304348	143
isoform_138028_14187_2	TGGTGGTGGTGGTGGTGG	TGG(3*6)	1151	18	CCGGCAATTGAACTTATTTGTAAAACGACAGCAAAATATCAACTACGCTCGAAGCTCAC[TGGTGGTGGTGGTGGTGG]ATGTGTGTTAACCATTATACCTGATCGTATCCTTTCTTGTCATTGCT	CCGGCAATTGAACTTATTTGTAA	60.234	0.347826	AGCAATGACAAGAAAGGATACGA	60.143	0.391304	124
isoform_138028_14187_3	TGGTGGTGGTGGTGGTGG	TGG(3*6)	1151	18	CCGGCAATTGAACTTATTTGTAAAACGACAGCAAAATATCAACTACGCTCGAAGCTCAC[TGGTGGTGGTGGTGGTGG]ATGTGTGTTAACCATTATACCTGATCGTATCCTTTCTTGTCATTGCTTTTGT	CCGGCAATTGAACTTATTTGTAA	60.234	0.347826	ACAAAAGCAATGACAAGAAAGGA	60.156	0.347826	129
isoform_138028_14187_4	TGGTGGTGGTGGTGGTGG	TGG(3*6)	1151	18	CCGGCAATTGAACTTATTTGTAAAACGACAGCAAAATATCAACTACGCTCGAAGCTCAC[TGGTGGTGGTGGTGGTGG]ATGTGTGTTAACCATTATACCTGATCGTATCCTTTCTTGTCATTGCTTTTGTTTTTCACAGGTTTTCTTTTTGCTCAT	CCGGCAATTGAACTTATTTGTAA	60.234	0.347826	ATGAGCAAAAAGAAAACCTGTGA	60.156	0.347826	155
isoform_138028_14187_5	TGGTGGTGGTGGTGGTGG	TGG(3*6)	1151	18	ACCAAGGTTTGTTGCAATCTATGGGAGTTAGTCATCCGGCAATTGAACTTATTTGTAAAACGACAGCAAAATATCAACTACGCTCGAAGCTCAC[TGGTGGTGGTGGTGGTGG]ATGTGTGTTAACCATTATACCTGATCGTATCCTTTCTTGTCATTGCT	ACCAAGGTTTGTTGCAATCTATG	60.282	0.391304	AGCAATGACAAGAAAGGATACGA	60.143	0.391304	159
isoform_138032_14189_1	CGCGCGCGCGCG	CG(2*6)	2188	12	GTTAGTGTGCTTGGAGTGAAACCGGCCAAGCTAAGAGCTATGGCTCACGTGTGCCGCGTCATTGTCTACTCTCGTTCGCGCA[CGCGCGCGCGCG]CCACACACACCGACAGTCTCAAGAGAAT	GTTAGTGTGCTTGGAGTGAAACC	60.089	0.478261	ATTCTCTTGAGACTGTCGGTGTG	60.727	0.478261	122
isoform_138032_14189_2	CGCGCGCGCGCG	CG(2*6)	2188	12	GTTAGTGTGCTTGGAGTGAAACCGGCCAAGCTAAGAGCTATGGCTCACGTGTGCCGCGTCATTGTCTACTCTCGTTCGCGCA[CGCGCGCGCGCG]CCACACACACCGACAGTCTCAAGAGAATG	GTTAGTGTGCTTGGAGTGAAACC	60.089	0.478261	CATTCTCTTGAGACTGTCGGTGT	60.727	0.478261	123
isoform_138032_14189_3	CGCGCGCGCGCG	CG(2*6)	2188	12	GGTTAGTGTGCTTGGAGTGAAACCGGCCAAGCTAAGAGCTATGGCTCACGTGTGCCGCGTCATTGTCTACTCTCGTTCGCGCA[CGCGCGCGCGCG]CCACACACACCGACAGTCTCAAGAGAAT	GGTTAGTGTGCTTGGAGTGAAAC	60.089	0.478261	ATTCTCTTGAGACTGTCGGTGTG	60.727	0.478261	123
isoform_138032_14189_4	CGCGCGCGCGCG	CG(2*6)	2188	12	GGTTAGTGTGCTTGGAGTGAAACCGGCCAAGCTAAGAGCTATGGCTCACGTGTGCCGCGTCATTGTCTACTCTCGTTCGCGCA[CGCGCGCGCGCG]CCACACACACCGACAGTCTCAAGAGAATG	GGTTAGTGTGCTTGGAGTGAAAC	60.089	0.478261	CATTCTCTTGAGACTGTCGGTGT	60.727	0.478261	124
isoform_138032_14189_5	CGCGCGCGCGCG	CG(2*6)	2188	12	CGTCATTGTCTACTCTCGTTCGCGCA[CGCGCGCGCGCG]CCACACACACCGACAGTCTCAAGAGAATGCTGGTCCTGCTCTCCTCATGTTGGGCTTTCAAAGCGCGGGAATGGGCTCTTTGGCGCGCTGTGATACATTGGATCTTCAAACTGATTGATTGC	CGTCATTGTCTACTCTCGTTCG	59.936	0.5	GCAATCAATCAGTTTGAAGATCC	59.965	0.391304	160
isoform_138102_14200_1	CACACACACACACA	CA(2*7)	375	14	TCATTATGCTGGCTAGATTGGATTCACAATCTGTTCGCGTATGGGTCAGTAGAATTCGGTCCGTGTGCGCGTGCGCGTGCACGCACACG[CACACACACACACA]TCCGAGTTACGATTTCTCTGATGCT	TCATTATGCTGGCTAGATTGGAT	59.969	0.391304	AGCATCAGAGAAATCGTAACTCG	59.926	0.434783	128
isoform_138102_14200_2	CACACACACACACA	CA(2*7)	375	14	GATGGTAACTTCATTATGCTGGCTAGATTGGATTCACAATCTGTTCGCGTATGGGTCAGTAGAATTCGGTCCGTGTGCGCGTGCGCGTGCACGCACACG[CACACACACACACA]TCCGAGTTACGATTTCTCTGATGCT	GATGGTAACTTCATTATGCTGGC	59.883	0.434783	AGCATCAGAGAAATCGTAACTCG	59.926	0.434783	138
isoform_138102_14200_3	CACACACACACACA	CA(2*7)	375	14	CTTCATTATGCTGGCTAGATTGGATTCACAATCTGTTCGCGTATGGGTCAGTAGAATTCGGTCCGTGTGCGCGTGCGCGTGCACGCACACG[CACACACACACACA]TCCGAGTTACGATTTCTCTGATGCT	CTTCATTATGCTGGCTAGATTGG	60.121	0.434783	AGCATCAGAGAAATCGTAACTCG	59.926	0.434783	130
isoform_138102_14200_4	CACACACACACACA	CA(2*7)	375	14	TCATTATGCTGGCTAGATTGGATTCACAATCTGTTCGCGTATGGGTCAGTAGAATTCGGTCCGTGTGCGCGTGCGCGTGCACGCACACG[CACACACACACACA]TCCGAGTTACGATTTCTCTGATGCTATTGGCAG	TCATTATGCTGGCTAGATTGGAT	59.969	0.391304	CTGCCAATAGCATCAGAGAAATC	60.238	0.434783	136
isoform_138102_14200_5	CACACACACACACA	CA(2*7)	375	14	TCATTATGCTGGCTAGATTGGATTCACAATCTGTTCGCGTATGGGTCAGTAGAATTCGGTCCGTGTGCGCGTGCGCGTGCACGCACACG[CACACACACACACA]TCCGAGTTACGATTTCTCTGATGCTATTGGCAGA	TCATTATGCTGGCTAGATTGGAT	59.969	0.391304	TCTGCCAATAGCATCAGAGAAAT	60.238	0.391304	137
isoform_138159_14209_1	CTCTCTCTCTCT	CT(2*6)	373	12	ATCCACAATTGCTACCTGATGATCATGC[CTCTCTCTCTCT]TGGCGGTGCGAGGAGCTGAGCAGGGAGGTCACAGAGGACGTGCGCGTCGAAAGAGAGGCAAATGAGCTGCCGTCCTCCACCATATCCCCGTTTTCTACGTA	ATCCACAATTGCTACCTGATGAT	59.744	0.391304	TACGTAGAAAACGGGGATATGGT	60.798	0.434783	141
isoform_138159_14209_2	CTCTCTCTCTCT	CT(2*6)	373	12	ATCCACAATTGCTACCTGATGATCATGC[CTCTCTCTCTCT]TGGCGGTGCGAGGAGCTGAGCAGGGAGGTCACAGAGGACGTGCGCGTCGAAAGAGAGGCAAATGAGCTGCCGTCCTCCACCATATCCCCGTTTTCTACGTAG	ATCCACAATTGCTACCTGATGAT	59.744	0.391304	CTACGTAGAAAACGGGGATATGG	60.907	0.478261	142
isoform_138159_14209_3	CTCTCTCTCTCT	CT(2*6)	373	12	AGATCCACAATTGCTACCTGATGATCATGC[CTCTCTCTCTCT]TGGCGGTGCGAGGAGCTGAGCAGGGAGGTCACAGAGGACGTGCGCGTCGAAAGAGAGGCAAATGAGCTGCCGTCCTCCACCATATCCCCGTTTTCTACGTA	AGATCCACAATTGCTACCTGATG	60.387	0.434783	TACGTAGAAAACGGGGATATGGT	60.798	0.434783	143
isoform_138159_14209_4	CTCTCTCTCTCT	CT(2*6)	373	12	ATCCACAATTGCTACCTGATGATCATGC[CTCTCTCTCTCT]TGGCGGTGCGAGGAGCTGAGCAGGGAGGTCACAGAGGACGTGCGCGTCGAAAGAGAGGCAAATGAGCTGCCGTCCTCCACCATATCCCCGTTTTCTACGTAGC	ATCCACAATTGCTACCTGATGAT	59.744	0.391304	GCTACGTAGAAAACGGGGATATG	61.032	0.478261	143
isoform_138159_14209_5	CTCTCTCTCTCT	CT(2*6)	373	12	ATCCACAATTGCTACCTGATGATCATGC[CTCTCTCTCTCT]TGGCGGTGCGAGGAGCTGAGCAGGGAGGTCACAGAGGACGTGCGCGTCGAAAGAGAGGCAAATGAGCTGCCGTCCTCCACCATATCCCCGTTTTCTACGTA	ATCCACAATTGCTACCTGATGAT	59.744	0.391304	TACGTAGAAAACGGGGATATGG	60.089	0.454545	141
isoform_138258_14227_1	TCTCTCTCTCTCTCTCTCTCTCTCTCTC	TC(2*14)	1025	28	CTTGTCTCATAGGTCATTTTGGCCTTTTGCAGACGTTAATATTCATTTCATTTCATT[TCTCTCTCTCTCTCTCTCTCTCTCTCTC]TACTAGAAAAGAGGCTGATTTTCTATTACTTGAAAGTCCTTGGAGCG	CTTGTCTCATAGGTCATTTTGGC	60.014	0.434783	CGCTCCAAGGACTTTCAAGTAA	60.76	0.454545	132
isoform_138258_14227_2	TCTCTCTCTCTCTCTCTCTCTCTCTCTC	TC(2*14)	1025	28	CTTGTCTCATAGGTCATTTTGGCCTTTTGCAGACGTTAATATTCATTTCATTTCATT[TCTCTCTCTCTCTCTCTCTCTCTCTCTC]TACTAGAAAAGAGGCTGATTTTCTATTACTTGAAAGTCCTTGGAGCG	CTTGTCTCATAGGTCATTTTGGC	60.014	0.434783	CGCTCCAAGGACTTTCAAGTAATA	60.945	0.416667	132
isoform_138258_14227_3	TCTCTCTCTCTCTCTCTCTCTCTCTCTC	TC(2*14)	1025	28	CTCATAGGTCATTTTGGCCTTTTGCAGACGTTAATATTCATTTCATTTCATT[TCTCTCTCTCTCTCTCTCTCTCTCTCTC]TACTAGAAAAGAGGCTGATTTTCTATTACTTGAAAGTCCTTGGAGCG	CTCATAGGTCATTTTGGCCTTTT	60.68	0.391304	CGCTCCAAGGACTTTCAAGTAA	60.76	0.454545	127
isoform_138258_14227_4	TCTCTCTCTCTCTCTCTCTCTCTCTCTC	TC(2*14)	1025	28	GTCTCATAGGTCATTTTGGCCTTTTGCAGACGTTAATATTCATTTCATTTCATT[TCTCTCTCTCTCTCTCTCTCTCTCTCTC]TACTAGAAAAGAGGCTGATTTTCTATTACTTGAAAGTCCTTGGAGCG	GTCTCATAGGTCATTTTGGCCTT	60.707	0.434783	CGCTCCAAGGACTTTCAAGTAA	60.76	0.454545	129
isoform_138258_14227_5	TCTCTCTCTCTCTCTCTCTCTCTCTCTC	TC(2*14)	1025	28	CTCATAGGTCATTTTGGCCTTTTGCAGACGTTAATATTCATTTCATTTCATT[TCTCTCTCTCTCTCTCTCTCTCTCTCTC]TACTAGAAAAGAGGCTGATTTTCTATTACTTGAAAGTCCTTGGAGCG	CTCATAGGTCATTTTGGCCTTTT	60.68	0.391304	CGCTCCAAGGACTTTCAAGTAATA	60.945	0.416667	127
isoform_138299_14233_3	TCGCCCTCGCCCTCGCCCTCGCCC	TCGCCC(6*4)	392	24	TAATTCTTGACTGCAGCTGTTGAAGGATCATCATCTTAGCAAAAATATTCTGCCA[TCGCCCTCGCCCTCGCCCTCGCCC]AAAAGATTTAACTACTTTTGCACACACAAGCCGTCTTGTTCTCATACCCTATG	TAATTCTTGACTGCAGCTGTTGA	60.068	0.391304	CATAGGGTATGAGAACAAGACGG	59.9	0.478261	132
isoform_138299_14233_4	TCGCCCTCGCCCTCGCCCTCGCCC	TCGCCC(6*4)	392	24	TAATTCTTGACTGCAGCTGTTGAAGGATCATCATCTTAGCAAAAATATTCTGCCA[TCGCCCTCGCCCTCGCCCTCGCCC]AAAAGATTTAACTACTTTTGCACACACAAGCCGTCTTGTTCTCATACCCTATGCACAGTATCCAGATTT	TAATTCTTGACTGCAGCTGTTGA	60.068	0.391304	AAATCTGGATACTGTGCATAGGG	59.407	0.434783	148
isoform_138313_14236_4	TCTCTCTCTCTCTCTCTCTCTCTCTCTCTC	TC(2*15)	1551	30	ATTGTATACATGTTGCAGAGGGCACAGTGCGAATGTTTTTGGCTGATTGGAGTCAAAGTCCTGATCCATTCTCTCTCTCAGCGCT[TCTCTCTCTCTCTCTCTCTCTCTCTCTCTC]TTTGCATACGAGATTCAGACTTGCCAC	ATTGTATACATGTTGCAGAGGGC	60.277	0.434783	GTGGCAAGTCTGAATCTCGTATG	61.048	0.478261	142
isoform_138313_14236_5	TCTCTCTCTCTCTCTCTCTCTCTCTCTCTC	TC(2*15)	1551	30	TCAAAGTCCTGATCCATTCTCTCTCTCAGCGCT[TCTCTCTCTCTCTCTCTCTCTCTCTCTCTC]TTTGCATACGAGATTCAGACTTGCCAC	TCAAAGTCCTGATCCATTCTCTC	59.705	0.434783	GTGGCAAGTCTGAATCTCGTATG	61.048	0.478261	90
isoform_138315_14238_1	GAGAGAGAGAGAGAGAGAGAGAGA	GA(2*12)	1400	24	GATCTCAGGTTCACCAAGAGAGAGGT[GAGAGAGAGAGAGAGAGAGAGAGA]GCCTAGAGGTCATTGTTGCCGCTCAAGACACCATCACGCTCGAGGCGATGGCTCGACTCAGCCAAAGAAGGAAAGCTCGATGTGGACCTGGAAACATTACCT	GATCTCAGGTTCACCAAGAGAGA	59.87	0.478261	AGGTAATGTTTCCAGGTCCACAT	60.862	0.434783	152
isoform_138315_14238_2	GAGAGAGAGAGAGAGAGAGAGAGA	GA(2*12)	1400	24	GATCTCAGGTTCACCAAGAGAGAGGT[GAGAGAGAGAGAGAGAGAGAGAGA]GCCTAGAGGTCATTGTTGCCGCTCAAGACACCATCACGCTCGAGGCGATGGCTCGACTCAGCCAAAGAAGGAAAGCTCGATGTGGACCTGGAAACATTACCTCAAACTC	GATCTCAGGTTCACCAAGAGAGA	59.87	0.478261	GAGTTTGAGGTAATGTTTCCAGG	59.056	0.434783	159
isoform_138315_14238_3	GAGAGAGAGAGAGAGAGAGAGAGA	GA(2*12)	1400	24	GATCTCAGGTTCACCAAGAGAGAGGT[GAGAGAGAGAGAGAGAGAGAGAGA]GCCTAGAGGTCATTGTTGCCGCTCAAGACACCATCACGCTCGAGGCGATGGCTCGACTCAGCCAAAGAAGGAAAGCTCGATGTGGACCTGGAAACATTACC	GATCTCAGGTTCACCAAGAGAGA	59.87	0.478261	GGTAATGTTTCCAGGTCCACAT	59.983	0.454545	151
isoform_138315_14238_4	GAGAGAGAGAGAGAGAGAGAGAGA	GA(2*12)	1400	24	GATCTCAGGTTCACCAAGAGAGAGGT[GAGAGAGAGAGAGAGAGAGAGAGA]GCCTAGAGGTCATTGTTGCCGCTCAAGACACCATCACGCTCGAGGCGATGGCTCGACTCAGCCAAAGAAGGAAAGCTCGATGTGGACCTGGAAACATTACCTCAAAC	GATCTCAGGTTCACCAAGAGAGA	59.87	0.478261	GTTTGAGGTAATGTTTCCAGGTC	58.927	0.434783	157
isoform_138315_14238_5	GAGAGAGAGAGAGAGAGAGAGAGA	GA(2*12)	1400	24	GATCTCAGGTTCACCAAGAGAGAGGT[GAGAGAGAGAGAGAGAGAGAGAGA]GCCTAGAGGTCATTGTTGCCGCTCAAGACACCATCACGCTCGAGGCGATGGCTCGACTCAGCCAAAGAAGGAAAGCTCGATGTGGACCTGGAAACATTACCTCAAACT	GATCTCAGGTTCACCAAGAGAGA	59.87	0.478261	AGTTTGAGGTAATGTTTCCAGGTC	59.817	0.416667	158
isoform_1383_239_3	GAGAGAGAGAGA	GA(2*6)	1584	12	CTCGAAGGATGAAAAATGACAATAAGGAAGCTATTGGTGAGACTGCTGCCATTCGCAATTGTATCAAGTGCTTGTCCAGGGATGTCCCGAGAG[GAGAGAGAGAGA]GGCAGCTTTACTTCTTTTTGAGCTCTCAAAACTATCAACCCTTG	CTCGAAGGATGAAAAATGACAAT	59.493	0.347826	CAAGGGTTGATAGTTTTGAGAGC	59.317	0.434783	149
isoform_1383_239_5	GAGAGAGAGAGA	GA(2*6)	1584	12	ATTGTATCAAGTGCTTGTCCAGGGATGTCCCGAGAG[GAGAGAGAGAGA]GGCAGCTTTACTTCTTTTTGAGCTCTCAAAACTATCAACCCTTGAGTGA	ATTGTATCAAGTGCTTGTCCAGG	60.419	0.434783	TCACTCAAGGGTTGATAGTTTTGA	60.035	0.375	97
isoform_138335_14241_1	CTCTCTCTCTCT	CT(2*6)	164	12	CTAAGCTGTTTCTGGATTTCCCTCTGGCTTTTATCGCCTCCACGGCTCATCTATGAGCGCTATCCCAAATTGTACCTTCTTGCGC[CTCTCTCTCTCT]TTTCTCTTTGCTGATCGCTAGTTGGTATT	CTAAGCTGTTTCTGGATTTCCCT	60.134	0.434783	AATACCAACTAGCGATCAGCAAA	60.16	0.391304	126
isoform_138335_14241_2	CTCTCTCTCTCT	CT(2*6)	164	12	CTAAGCTGTTTCTGGATTTCCCTCTGGCTTTTATCGCCTCCACGGCTCATCTATGAGCGCTATCCCAAATTGTACCTTCTTGCGC[CTCTCTCTCTCT]TTTCTCTTTGCTGATCGCTAGTTGGTAT	CTAAGCTGTTTCTGGATTTCCCT	60.134	0.434783	ATACCAACTAGCGATCAGCAAAG	59.826	0.434783	125
isoform_138335_14241_3	CTCTCTCTCTCT	CT(2*6)	164	12	CTAAGCTGTTTCTGGATTTCCCTCTGGCTTTTATCGCCTCCACGGCTCATCTATGAGCGCTATCCCAAATTGTACCTTCTTGCGC[CTCTCTCTCTCT]TTTCTCTTTGCTGATCGCTAGTTGGTATTATGTTCCTTCAGCACGCT	CTAAGCTGTTTCTGGATTTCCCT	60.134	0.434783	AGCGTGCTGAAGGAACATAATAC	59.706	0.434783	144
isoform_138335_14241_4	CTCTCTCTCTCT	CT(2*6)	164	12	TATCCCAAATTGTACCTTCTTGCGC[CTCTCTCTCTCT]TTTCTCTTTGCTGATCGCTAGTTGGTATTATGTTCCTTCAGCACGCT	TATCCCAAATTGTACCTTCTTGC	59.407	0.391304	AGCGTGCTGAAGGAACATAATAC	59.706	0.434783	84
isoform_138335_14241_5	CTCTCTCTCTCT	CT(2*6)	164	12	CGCTATCCCAAATTGTACCTTCTTGCGC[CTCTCTCTCTCT]TTTCTCTTTGCTGATCGCTAGTTGGTATTATGTTCCTTCAGCACGCT	CGCTATCCCAAATTGTACCTTCT	60.698	0.434783	AGCGTGCTGAAGGAACATAATAC	59.706	0.434783	87
isoform_138350_14245_1	TGTGTGTGTGTGTGTGTGTGTGTGTG	TG(2*13)	1216	26	GCCCTGCATCTCTAGAGTTATGAGAAAACTTCAGTACGCAGATCTTTGTATTGA[TGTGTGTGTGTGTGTGTGTGTGTGTG]TAGGAAGTGTATATTGGTACCTAGTTCTACACCCGCTATTGGGCACTGAGAAGGTTAGTGGGGATGT	GCCCTGCATCTCTAGAGTTATGA	59.891	0.478261	ACATCCCCACTAACCTTCTCAGT	60.286	0.478261	147
isoform_138350_14245_2	TGTGTGTGTGTGTGTGTGTGTGTGTG	TG(2*13)	1216	26	GCCCTGCATCTCTAGAGTTATGAGAAAACTTCAGTACGCAGATCTTTGTATTGA[TGTGTGTGTGTGTGTGTGTGTGTGTG]TAGGAAGTGTATATTGGTACCTAGTTCTACACCCGCTATTGGGCACTGAGAAGGTTAGTGGGGATGTTGT	GCCCTGCATCTCTAGAGTTATGA	59.891	0.478261	ACAACATCCCCACTAACCTTCTC	60.63	0.478261	150
isoform_138350_14245_3	TGTGTGTGTGTGTGTGTGTGTGTGTG	TG(2*13)	1216	26	GCCCTGCATCTCTAGAGTTATGAGAAAACTTCAGTACGCAGATCTTTGTATTGA[TGTGTGTGTGTGTGTGTGTGTGTGTG]TAGGAAGTGTATATTGGTACCTAGTTCTACACCCGCTATTGGGCACTGAGAAGGTTAG	GCCCTGCATCTCTAGAGTTATGA	59.891	0.478261	CTAACCTTCTCAGTGCCCAATAG	59.334	0.478261	138
isoform_138350_14245_4	TGTGTGTGTGTGTGTGTGTGTGTGTG	TG(2*13)	1216	26	GCCCTGCATCTCTAGAGTTATGAGAAAACTTCAGTACGCAGATCTTTGTATTGA[TGTGTGTGTGTGTGTGTGTGTGTGTG]TAGGAAGTGTATATTGGTACCTAGTTCTACACCCGCTATTGGGCACTGAGAAGGTTAGTGGGGATGTT	GCCCTGCATCTCTAGAGTTATGA	59.891	0.478261	AACATCCCCACTAACCTTCTCAG	60.747	0.478261	148
isoform_138367_14248_1	TCTCTCTCTCTC	TC(2*6)	1388	12	CCATAGTCCACCTACTAAGCACGCGTGCACTCTGTGCGAGGGAGCAGCCAGCCCCTCTCTCTTCTCTCCACATCACCT[TCTCTCTCTCTC]ACACAGCGAGCAGTCAATACAAACATCTCACTCTGCCGT	CCATAGTCCACCTACTAAGCACG	60.082	0.521739	ACGGCAGAGTGAGATGTTTGTAT	60.075	0.434783	129
isoform_138367_14248_2	TCTCTCTCTCTC	TC(2*6)	1388	12	ACCCCATAGTCCACCTACTAAGCACGCGTGCACTCTGTGCGAGGGAGCAGCCAGCCCCTCTCTCTTCTCTCCACATCACCT[TCTCTCTCTCTC]ACACAGCGAGCAGTCAATACAAACATCTCACTCTGCCGT	ACCCCATAGTCCACCTACTAAGC	59.81	0.521739	ACGGCAGAGTGAGATGTTTGTAT	60.075	0.434783	132
isoform_138367_14248_3	TCTCTCTCTCTC	TC(2*6)	1388	12	CATAGTCCACCTACTAAGCACGCGTGCACTCTGTGCGAGGGAGCAGCCAGCCCCTCTCTCTTCTCTCCACATCACCT[TCTCTCTCTCTC]ACACAGCGAGCAGTCAATACAAACATCTCACTCTGCCGT	CATAGTCCACCTACTAAGCACGC	60.215	0.521739	ACGGCAGAGTGAGATGTTTGTAT	60.075	0.434783	128
isoform_138367_14248_4	TCTCTCTCTCTC	TC(2*6)	1388	12	CCATAGTCCACCTACTAAGCACGCGTGCACTCTGTGCGAGGGAGCAGCCAGCCCCTCTCTCTTCTCTCCACATCACCT[TCTCTCTCTCTC]ACACAGCGAGCAGTCAATACAAACATCTCACTCTGCCG	CCATAGTCCACCTACTAAGCACG	60.082	0.521739	CGGCAGAGTGAGATGTTTGTATT	60.547	0.434783	128
isoform_138367_14248_5	TCTCTCTCTCTC	TC(2*6)	1388	12	ACCCCATAGTCCACCTACTAAGCACGCGTGCACTCTGTGCGAGGGAGCAGCCAGCCCCTCTCTCTTCTCTCCACATCACCT[TCTCTCTCTCTC]ACACAGCGAGCAGTCAATACAAACATCTCACTCTGCCG	ACCCCATAGTCCACCTACTAAGC	59.81	0.521739	CGGCAGAGTGAGATGTTTGTATT	60.547	0.434783	131
isoform_13845_2729_1	AGAGAGAGAGAGAG	AG(2*7)	185	14	CTGAGAGAAGAGATGAGACCGAGC[AGAGAGAGAGAGAG]TGCTTCTCATCAGTAAGTAAGACACTCTCTAGCAGTTGACACGTTGA	CTGAGAGAAGAGATGAGACCGAG	59.77	0.521739	TCAACGTGTCAACTGCTAGAGAG	59.733	0.478261	85
isoform_13845_2729_2	AGAGAGAGAGAGAG	AG(2*7)	185	14	CTGAGAGAAGAGATGAGACCGAGC[AGAGAGAGAGAGAG]TGCTTCTCATCAGTAAGTAAGACACTCTCTAGCAGTTGACACGTTGAG	CTGAGAGAAGAGATGAGACCGAG	59.77	0.521739	CTCAACGTGTCAACTGCTAGAGA	59.733	0.478261	86
isoform_13845_2729_5	AGAGAGAGAGAGAG	AG(2*7)	185	14	ACTGAGAGAAGAGATGAGACCGAGC[AGAGAGAGAGAGAG]TGCTTCTCATCAGTAAGTAAGACACTCTCTAGCAGTTGACACGTTGA	ACTGAGAGAAGAGATGAGACCGA	59.636	0.478261	TCAACGTGTCAACTGCTAGAGAG	59.733	0.478261	86
isoform_138458_14259_4	AGAGAGAGAGAG	AG(2*6)	257	12	AGGCGGAGTTAGCACTAGAGAGAGAAGAGGAGTCATGAT[AGAGAGAGAGAG]GAATAAAAAATGGCGCGTATTGGATGGCAGCCCCATCTGTCAGGCCGAGCGGGCTCTTGGGTGTAGTGGACATGCCAGGCCGTTGATGTCGTATCGCTTTCTTCATC	AGGCGGAGTTAGCACTAGAGAGA	61.031	0.521739	GATGAAGAAAGCGATACGACATC	60.116	0.434783	158
isoform_138458_14259_5	AGAGAGAGAGAG	AG(2*6)	257	12	GAGGCGGAGTTAGCACTAGAGAGAGAAGAGGAGTCATGAT[AGAGAGAGAGAG]GAATAAAAAATGGCGCGTATTGGATGGCAGCCCCATCTGTCAGGCCGAGCGGGCTCTTGGGTGTAGTGGACATGCCAGGCCGTTGATGTCGTATCGCTTTCTTCATC	GAGGCGGAGTTAGCACTAGAGAG	61.031	0.565217	GATGAAGAAAGCGATACGACATC	60.116	0.434783	159
isoform_138474_14263_5	ACACACACACACACACACACACACACAC	AC(2*14)	242	28	ACACACGCTACAAGGTTTCTCACAGAG[ACACACACACACACACACACACACACAC]GCACAGCTGCACTTCTTGTTTTCTTTGT	ACACACGCTACAAGGTTTCTCAC	60.633	0.478261	ACAAAGAAAACAAGAAGTGCAGC	59.982	0.391304	83
isoform_138604_14299_1	CACACACACACACACACACACACACACACACA	CA(2*16)	2207	32	AGCTCTCATGGGCTTGTTAGACCTGGGGCCCTCTACCGATTT[CACACACACACACACACACACACACACACACA]CGTCTCTAGAGTCTCCACCAGATGGCCTTGCTTCAGAGACTGGTAATTCAGCCCTTC	AGCTCTCATGGGCTTGTTAGAC	59.913	0.5	GAAGGGCTGAATTACCAGTCTCT	60.142	0.478261	131
isoform_138604_14299_2	CACACACACACACACACACACACACACACACA	CA(2*16)	2207	32	AGCTCTCATGGGCTTGTTAGACCTGGGGCCCTCTACCGATTT[CACACACACACACACACACACACACACACACA]CGTCTCTAGAGTCTCCACCAGATGGCCTTGCTTCAGAGACTGGTAATTCAGCCCTTCCGCAGAGTATGGTGTATCTCTC	AGCTCTCATGGGCTTGTTAGAC	59.913	0.5	GAGAGATACACCATACTCTGCGG	60.165	0.521739	153
isoform_138604_14299_3	CACACACACACACACACACACACACACACACA	CA(2*16)	2207	32	CTCTCATGGGCTTGTTAGACCTGGGGCCCTCTACCGATTT[CACACACACACACACACACACACACACACACA]CGTCTCTAGAGTCTCCACCAGATGGCCTTGCTTCAGAGACTGGTAATTCAGCCCTTC	CTCTCATGGGCTTGTTAGACCT	59.773	0.5	GAAGGGCTGAATTACCAGTCTCT	60.142	0.478261	129
isoform_138604_14299_4	CACACACACACACACACACACACACACACACA	CA(2*16)	2207	32	CTCTCATGGGCTTGTTAGACCTGGGGCCCTCTACCGATTT[CACACACACACACACACACACACACACACACA]CGTCTCTAGAGTCTCCACCAGATGGCCTTGCTTCAGAGACTGGTAATTCAGCCCTTCCGCAGAGTATGGTGTATCTCTC	CTCTCATGGGCTTGTTAGACCT	59.773	0.5	GAGAGATACACCATACTCTGCGG	60.165	0.521739	151
isoform_138604_14299_5	CACACACACACACACACACACACACACACACA	CA(2*16)	2207	32	AGCTCTCATGGGCTTGTTAGACCTGGGGCCCTCTACCGATTT[CACACACACACACACACACACACACACACACA]CGTCTCTAGAGTCTCCACCAGATGGCCTTGCTTCAGAGACTGGTAATTCAGCCCTTCCGCAGAGTATGGTGTATCT	AGCTCTCATGGGCTTGTTAGAC	59.913	0.5	AGATACACCATACTCTGCGGAAG	59.688	0.478261	150
isoform_138675_14306_1	CTCTCTCTCTCTCTCTCTCTCTCTCTCTCTCTCTCT	CT(2*18)	2795	36	ATCGCCACCATCTAACACATAGA[CTCTCTCTCTCTCTCTCTCTCTCTCTCTCTCTCTCT]CGGGCGGGCGCCACACACAAACAACACACAACCCCCCCTTGAGCTTCAGCCTTCCCCTCATCTAAAATTGTATCATTTTCCCCTTTTCTG	ATCGCCACCATCTAACACATAGA	60.755	0.434783	CAGAAAAGGGGAAAATGATACAA	59.382	0.347826	149
isoform_138693_14308_1	GAGAGAGAGAGAGAGAGAGAGAGAGAGAGAGAGAGAGAGAGAGAGAGAGAGAGAGAGA	GA(2*29)	199	58	GTCAATATTTCGGAGCTTCAGGAGGCCATTTACCTGTGAGTTGCGACGTGAGCGCTTCGTGTCAGCGTGC[GAGAGAGAGAGAGAGAGAGAGAGAGAGAGAGAGAGAGAGAGAGAGAGAGAGAGAGAGA]GGCTTATTGTTGCGCTTCTTTTATCC	GTCAATATTTCGGAGCTTCAGG	60.095	0.454545	GGATAAAAGAAGCGCAACAATAA	59.67	0.347826	154
isoform_138693_14308_2	GAGAGAGAGAGAGAGAGAGAGAGAGAGAGAGAGAGAGAGAGAGAGAGAGAGAGAGAGA	GA(2*29)	199	58	GGTCAATATTTCGGAGCTTCAGGAGGCCATTTACCTGTGAGTTGCGACGTGAGCGCTTCGTGTCAGCGTGC[GAGAGAGAGAGAGAGAGAGAGAGAGAGAGAGAGAGAGAGAGAGAGAGAGAGAGAGAGA]GGCTTATTGTTGCGCTTCTTTTATCC	GGTCAATATTTCGGAGCTTCAG	60.095	0.454545	GGATAAAAGAAGCGCAACAATAA	59.67	0.347826	155
isoform_138693_14308_3	GAGAGAGAGAGAGAGAGAGAGAGAGAGAGAGAGAGAGAGAGAGAGAGAGAGAGAGAGA	GA(2*29)	199	58	CAATATTTCGGAGCTTCAGGAGGCCATTTACCTGTGAGTTGCGACGTGAGCGCTTCGTGTCAGCGTGC[GAGAGAGAGAGAGAGAGAGAGAGAGAGAGAGAGAGAGAGAGAGAGAGAGAGAGAGAGA]GGCTTATTGTTGCGCTTCTTTTATCC	CAATATTTCGGAGCTTCAGGAG	60.217	0.454545	GGATAAAAGAAGCGCAACAATAA	59.67	0.347826	152
isoform_138693_14308_4	GAGAGAGAGAGAGAGAGAGAGAGAGAGAGAGAGAGAGAGAGAGAGAGAGAGAGAGAGA	GA(2*29)	199	58	GTCAATATTTCGGAGCTTCAGGAGGCCATTTACCTGTGAGTTGCGACGTGAGCGCTTCGTGTCAGCGTGC[GAGAGAGAGAGAGAGAGAGAGAGAGAGAGAGAGAGAGAGAGAGAGAGAGAGAGAGAGA]GGCTTATTGTTGCGCTTCTTTTATCCATTTT	GTCAATATTTCGGAGCTTCAGG	60.095	0.454545	AAAATGGATAAAAGAAGCGCAAC	60.786	0.347826	159
isoform_138693_14308_5	GAGAGAGAGAGAGAGAGAGAGAGAGAGAGAGAGAGAGAGAGAGAGAGAGAGAGAGAGA	GA(2*29)	199	58	GGTCAATATTTCGGAGCTTCAGGAGGCCATTTACCTGTGAGTTGCGACGTGAGCGCTTCGTGTCAGCGTGC[GAGAGAGAGAGAGAGAGAGAGAGAGAGAGAGAGAGAGAGAGAGAGAGAGAGAGAGAGA]GGCTTATTGTTGCGCTTCTTTTATCCATTTT	GGTCAATATTTCGGAGCTTCAG	60.095	0.454545	AAAATGGATAAAAGAAGCGCAAC	60.786	0.347826	160
isoform_138784_14313_1	TCTCTCTCTCTCTCTCTCTCTCTCTCTCTCTCTC	TC(2*17)	216	34	AGCACAAAAAGCCCCAGTATAAGGG[TCTCTCTCTCTCTCTCTCTCTCTCTCTCTCTCTC]GGTTTCAGAGGTTTCAGAGGCATGGTTTCAGCATAGATAGACTGCCTCC	AGCACAAAAAGCCCCAGTATAAG	60.841	0.434783	GGAGGCAGTCTATCTATGCTGAA	59.891	0.478261	108
isoform_138784_14313_2	TCTCTCTCTCTCTCTCTCTCTCTCTCTCTCTCTC	TC(2*17)	216	34	AGCACAAAAAGCCCCAGTATAAGGG[TCTCTCTCTCTCTCTCTCTCTCTCTCTCTCTCTC]GGTTTCAGAGGTTTCAGAGGCATGGTTTCAGCATAGATAGACTGCCTCCCTTT	AGCACAAAAAGCCCCAGTATAAG	60.841	0.434783	AAAGGGAGGCAGTCTATCTATGC	60.128	0.478261	112
isoform_138784_14313_3	TCTCTCTCTCTCTCTCTCTCTCTCTCTCTCTCTC	TC(2*17)	216	34	AGCACAAAAAGCCCCAGTATAAGGG[TCTCTCTCTCTCTCTCTCTCTCTCTCTCTCTCTC]GGTTTCAGAGGTTTCAGAGGCATGGTTTCAGCATAGATAGACTGCCTCCCTT	AGCACAAAAAGCCCCAGTATAAG	60.841	0.434783	AAGGGAGGCAGTCTATCTATGCT	59.795	0.478261	111
isoform_138784_14313_4	TCTCTCTCTCTCTCTCTCTCTCTCTCTCTCTCTC	TC(2*17)	216	34	GCACAAAAAGCCCCAGTATAAGGG[TCTCTCTCTCTCTCTCTCTCTCTCTCTCTCTCTC]GGTTTCAGAGGTTTCAGAGGCATGGTTTCAGCATAGATAGACTGCCTCC	GCACAAAAAGCCCCAGTATAAG	60.023	0.454545	GGAGGCAGTCTATCTATGCTGAA	59.891	0.478261	107
isoform_138784_14313_5	TCTCTCTCTCTCTCTCTCTCTCTCTCTCTCTCTC	TC(2*17)	216	34	AGCACAAAAAGCCCCAGTATAAGGG[TCTCTCTCTCTCTCTCTCTCTCTCTCTCTCTCTC]GGTTTCAGAGGTTTCAGAGGCATGGTTTCAGCATAGATAGACTGCCTCC	AGCACAAAAAGCCCCAGTATAA	60.023	0.409091	GGAGGCAGTCTATCTATGCTGAA	59.891	0.478261	108
isoform_138870_14320_1	CACACACACACACACACACACA	CA(2*11)	192	22	CCTCTCCCTACTATCCTCCCTCTCTCTTCTCTCTCTCTT[CACACACACACACACACACACA]CTCTCTCCTGTCTCTCCTTCCAAGACGAGCAACACGAGGCAACATTCGGAGTTGATGAGGACAGATTTA	CCTCTCCCTACTATCCTCCCTCT	60.447	0.565217	TAAATCTGTCCTCATCAACTCCG	60.489	0.434783	130
isoform_138870_14320_4	CACACACACACACACACACACA	CA(2*11)	192	22	CCTCTCCCTACTATCCTCCCTCTCTCTTCTCTCTCTCTT[CACACACACACACACACACACA]CTCTCTCCTGTCTCTCCTTCCAAGACGAGCAACACGAGGCAACATTCGGAGTTGATGAGGACAGATTTACCATGGCTTGCAACT	CCTCTCCCTACTATCCTCCCTCT	60.447	0.565217	AGTTGCAAGCCATGGTAAATCT	60.028	0.409091	145
isoform_138870_14320_5	CACACACACACACACACACACA	CA(2*11)	192	22	CCTCTCCCTACTATCCTCCCTCTCTCTTCTCTCTCTCTT[CACACACACACACACACACACA]CTCTCTCCTGTCTCTCCTTCCAAGACGAGCAACACGAGGCAACATTCGGAGTTGATGAGGACAGATTTACCATG	CCTCTCCCTACTATCCTCCCTCT	60.447	0.565217	CATGGTAAATCTGTCCTCATCAA	58.962	0.391304	135
isoform_138887_14322_4	AGAGAGAGAGAGAGAGAGAGAGAGAG	AG(2*13)	275	26	TTTGATGAGCTTGTGGTAGACTGTTTTTGTGTAGTCTCTTTTGC[AGAGAGAGAGAGAGAGAGAGAGAGAG]AATTATCGTCCATAGAGGTCAGATATGAA	TTTGATGAGCTTGTGGTAGACTG	59.434	0.434783	TTCATATCTGACCTCTATGGACGA	59.987	0.416667	99
isoform_138887_14323_5	GAGAGAGAGAGAGAGAGAGAGAGAGAGAGAGAGAGAGAGAGAGAGAGAGAGAGAGAGAGAGAGAGAGAGA	GA(2*35)	335	70	GAATTATCGTCCATAGAGGTCAGATATGAACCATG[GAGAGAGAGAGAGAGAGAGAGAGAGAGAGAGAGAGAGAGAGAGAGAGAGAGAGAGAGAGAGAGAGAGAGA]GCCTCAGTTTGCGTTACAGCAAGTTTGTTTGAAGTTTTCCACACTTGGA	GAATTATCGTCCATAGAGGTCAGA	58.673	0.416667	TCCAAGTGTGGAAAACTTCAAAC	60.41	0.391304	154
isoform_138943_14331_1	TCTCTCTCTCTCTCTCTCTCTCTCTCTCTCTC	TC(2*16)	307	32	CTCAGTCTGACGGTGTTTTGATACCCTCGCAGGGCGGATTGGTCTGCGCCGACGACG[TCTCTCTCTCTCTCTCTCTCTCTCTCTCTCTC]ATTGAGCTTACTAACGGGCCGCGGGCGGTCTTTTGTTAAGAGAAACAATGAGTTCGCA	CTCAGTCTGACGGTGTTTTGATA	59.295	0.434783	TGCGAACTCATTGTTTCTCTTAAC	59.834	0.375	147
isoform_138943_14331_2	TCTCTCTCTCTCTCTCTCTCTCTCTCTCTCTC	TC(2*16)	307	32	CAGTCTGACGGTGTTTTGATACCCTCGCAGGGCGGATTGGTCTGCGCCGACGACG[TCTCTCTCTCTCTCTCTCTCTCTCTCTCTCTC]ATTGAGCTTACTAACGGGCCGCGGGCGGTCTTTTGTTAAGAGAAACAATGAGTTCGCA	CAGTCTGACGGTGTTTTGATACC	60.816	0.478261	TGCGAACTCATTGTTTCTCTTAAC	59.834	0.375	145
isoform_138943_14331_3	TCTCTCTCTCTCTCTCTCTCTCTCTCTCTCTC	TC(2*16)	307	32	CTCAGTCTGACGGTGTTTTGATACCCTCGCAGGGCGGATTGGTCTGCGCCGACGACG[TCTCTCTCTCTCTCTCTCTCTCTCTCTCTCTC]ATTGAGCTTACTAACGGGCCGCGGGCGGTCTTTTGTTAAGAGAAACAATGAGTTCGCAG	CTCAGTCTGACGGTGTTTTGATA	59.295	0.434783	CTGCGAACTCATTGTTTCTCTTA	58.71	0.391304	148
isoform_138943_14331_4	TCTCTCTCTCTCTCTCTCTCTCTCTCTCTCTC	TC(2*16)	307	32	TCAGTCTGACGGTGTTTTGATACCCTCGCAGGGCGGATTGGTCTGCGCCGACGACG[TCTCTCTCTCTCTCTCTCTCTCTCTCTCTCTC]ATTGAGCTTACTAACGGGCCGCGGGCGGTCTTTTGTTAAGAGAAACAATGAGTTCGCA	TCAGTCTGACGGTGTTTTGATAC	59.159	0.434783	TGCGAACTCATTGTTTCTCTTAAC	59.834	0.375	146
isoform_138943_14331_5	TCTCTCTCTCTCTCTCTCTCTCTCTCTCTCTC	TC(2*16)	307	32	CAGTCTGACGGTGTTTTGATACCCTCGCAGGGCGGATTGGTCTGCGCCGACGACG[TCTCTCTCTCTCTCTCTCTCTCTCTCTCTCTC]ATTGAGCTTACTAACGGGCCGCGGGCGGTCTTTTGTTAAGAGAAACAATGAGTTCGCAG	CAGTCTGACGGTGTTTTGATACC	60.816	0.478261	CTGCGAACTCATTGTTTCTCTTA	58.71	0.391304	146
[truncated: 28,175 more rows]
