# Supplementary material for: Full-length transcriptome analysis of Adiantum flabellulatum gametophyte
Source: PeerJ. 2022 Mar 9;10:e13079. doi: 10.7717/peerj.13079 (PMC8917799; doi:10.7717/peerj.13079)
Supplement: Supplemental Information 5 [file peerj-10-13079-s005.xlsx]

## Sheet: Table S4
Table S5 Homologous species distribution of A. flabellulatum transcripts annotated in the non-redundant (NR) database
Species	Gene numbers	Percentage
Marchantia polymorpha	29061	0.1156
Selaginella moellendorffii	27624	0.1098
Physcomitrella patens	23769	0.0945
Picea sitchensis	21889	0.087
Marchantia polymorpha subsp. ruderalis	6910	0.0275
Amborella trichopoda	5764	0.0229
Nymphaea colorata	3239	0.0129
Nelumbo nucifera	3052	0.0121
Cinnamomum micranthum f. kanehirae	2627	0.0104
Nymphaea thermarum	2298	0.0091
Elaeis guineensis	2072	0.0082
Vitis vinifera	2003	0.008
Ananas comosus	1978	0.0079
Macleaya cordata	1812	0.0072
Phoenix dactylifera	1809	0.0072
Papaver somniferum	1636	0.0065
Adiantum capillus-veneris	1406	0.0056
Asparagus officinalis	1369	0.0054
Hevea brasiliensis	1308	0.0052
Aquilegia coerulea	1252	0.005
Chara braunii	1242	0.0049
Musa acuminata subsp. malaccensis	1210	0.0048
Musa balbisiana	1208	0.0048
Arachis hypogaea	1206	0.0048
Pteris vittata	1179	0.0047
Klebsormidium nitens	1162	0.0046
Manihot esculenta	1119	0.0044
Punica granatum	1116	0.0044
Hymenophyllum caudiculatum	1083	0.0043
Helianthus annuus	1081	0.0043
Hibiscus syriacus	1066	0.0042
Eucalyptus grandis	1042	0.0041
Zea mays	1021	0.0041
Sesamum indicum	1018	0.004
Daucus carota subsp. sativus	1009	0.004
Prosopis alba	999	0.004
Medicago truncatula	992	0.0039
Chenopodium quinoa	990	0.0039
Ceratopteris richardii	932	0.0037
Actinidia chinensis var. chinensis	917	0.0036
Dendrobium catenatum	898	0.0036
Ipomoea triloba	897	0.0036
Nyssa sinensis	888	0.0035
Cannabis sativa	880	0.0035
Glycine soja	876	0.0035
Durio zibethinus	875	0.0035
Mikania micrantha	849	0.0034
Triticum turgidum subsp. durum	828	0.0033
Ipomoea nil	818	0.0033
Pistacia vera	817	0.0032
Ginkgo biloba	782	0.0031
Olea europaea var. sylvestris	779	0.0031
Malus domestica	771	0.0031
Juglans regia	770	0.0031
Salvia splendens	751	0.003
Jatropha curcas	747	0.003
Morus notabilis	738	0.0029
Tarenaya hassleriana	731	0.0029
Theobroma cacao	724	0.0029
Lupinus albus	715	0.0028
Ziziphus jujuba	712	0.0028
Lupinus angustifolius	707	0.0028
Ricinus communis	705	0.0028
Cynara cardunculus var. scolymus	696	0.0028
Funaria hygrometrica	696	0.0028
Oryza sativa Japonica Group	685	0.0027
Cajanus cajan	676	0.0027
Handroanthus impetiginosus	669	0.0027
Carex littledalei	667	0.0027
Ensete ventricosum	666	0.0026
Beta vulgaris subsp. vulgaris	666	0.0026
Syzygium oleosum	659	0.0026
Apostasia shenzhenica	656	0.0026
Erythranthe guttata	647	0.0026
Phalaenopsis equestris	623	0.0025
Rosa chinensis	623	0.0025
Vigna unguiculata	614	0.0024
Rhodamnia argentea	608	0.0024
Quercus suber	607	0.0024
Lactuca sativa	602	0.0024
Pinus taeda	601	0.0024
Acer yangbiense	583	0.0023
Camellia sinensis	581	0.0023
Spinacia oleracea	575	0.0023
Nicotiana tabacum	567	0.0023
Abrus precatorius	567	0.0023
Volvox carteri f. nagariensis	561	0.0022
Fragaria vesca subsp. vesca	552	0.0022
Sorghum bicolor	546	0.0022
Eragrostis curvula	542	0.0022
Cucumis sativus	534	0.0021
Coffea canephora	532	0.0021
Coffea arabica	531	0.0021
Populus trichocarpa	530	0.0021
Digitaria exilis	521	0.0021
Trema orientale	518	0.0021
Artemisia annua	515	0.002
Quercus lobata	513	0.002
Glycine max	510	0.002
Populus alba	508	0.002
Striga asiatica	507	0.002
Carica papaya	505	0.002
Rhamnella rubrinervis	504	0.002
Arabidopsis thaliana	503	0.002
Gossypium barbadense	500	0.002
Chlamydomonas reinhardtii	498	0.002
Nicotiana attenuata	495	0.002
Capsicum annuum	493	0.002
Marsilea vestita	488	0.0019
Camellia sinensis var. sinensis	485	0.0019
Momordica charantia	484	0.0019
Prunus dulcis	482	0.0019
Cucurbita maxima	464	0.0018
Corchorus capsularis	460	0.0018
Citrus sinensis	456	0.0018
Spatholobus suberectus	455	0.0018
Herrania umbratica	455	0.0018
Vigna angularis var. angularis	455	0.0018
Malus baccata	454	0.0018
Salix brachista	451	0.0018
Castanea mollissima	448	0.0018
Morella rubra	448	0.0018
Cucurbita pepo subsp. pepo	445	0.0018
Cicer arietinum	444	0.0018
Solanum tuberosum	442	0.0018
Gossypium raimondii	440	0.0017
Coffea eugenioides	439	0.0017
Setaria viridis	436	0.0017
Zostera marina	435	0.0017
Panicum miliaceum	434	0.0017
Brassica rapa	422	0.0017
Oryza brachyantha	418	0.0017
Populus euphratica	417	0.0017
Brassica napus	415	0.0017
Dryopteris erythrosora	415	0.0017
Brachypodium distachyon	409	0.0016
Rhododendron williamsianum	405	0.0016
Carpinus fangiana	404	0.0016
Raphanus sativus	401	0.0016
Cephalotus follicularis	396	0.0016
Corchorus olitorius	392	0.0016
Pyrus ussuriensis x Pyrus communis	384	0.0015
Parasponia andersonii	381	0.0015
Cucurbita moschata	379	0.0015
Dryopteris fragrans	375	0.0015
Camelina sativa	373	0.0015
Citrus clementina	370	0.0015
Oryza meyeriana var. granulata	366	0.0015
Panicum hallii	366	0.0015
Pyrus x bretschneideri	360	0.0014
Citrus unshiu	358	0.0014
Dorcoceras hygrometricum	357	0.0014
Gossypium mustelinum	354	0.0014
Microthlaspi erraticum	343	0.0014
Cucumis melo var. makuwa	339	0.0013
Capsella rubella	338	0.0013
Cuscuta australis	338	0.0013
Brassica cretica	334	0.0013
Polystichum munitum	329	0.0013
Phaseolus vulgaris	320	0.0013
Anemia phyllitidis	319	0.0013
Vigna radiata var. radiata	316	0.0013
Mucuna pruriens	313	0.0012
Gossypium arboreum	302	0.0012
Solanum pennellii	301	0.0012
Dichanthelium oligosanthes	299	0.0012
Prunus persica	298	0.0012
Taxus chinensis	296	0.0012
Adiantum reniforme var. sinense	294	0.0012
Gossypium hirsutum	294	0.0012
Symbiodinium microadriaticum	287	0.0011
Capsicum baccatum	286	0.0011
Trifolium subterraneum	284	0.0011
Nicotiana tomentosiformis	282	0.0011
Pinus sylvestris	281	0.0011
Solanum chilense	267	0.0011
Arabis nemorensis	266	0.0011
Porphyra umbilicalis	265	0.0011
Trifolium pratense	265	0.0011
Gossypium australe	264	0.001
Aegilops tauschii subsp. tauschii	260	0.001
Setaria italica	255	0.001
Equisetum arvense	249	0.001
Prunus yedoensis var. nudiflora	249	0.001
Gossypium tomentosum	249	0.001
Prunus avium	247	0.001
Panicum hallii var. hallii	247	0.001
Genlisea aurea	243	0.001
Prunus mume	242	0.001
Eutrema salsugineum	237	0.0009
Pinus tabuliformis	234	0.0009
Nicotiana sylvestris	233	0.0009
Gossypium darwinii	231	0.0009
Solanum lycopersicum	228	0.0009
Apopellia endiviifolia (species B)	222	0.0009
Pinus pinaster	212	0.0008
Ceratopteris thalictroides	210	0.0008
Arachis duranensis	206	0.0008
Arabidopsis lyrata subsp. lyrata	205	0.0008
Emiliania huxleyi CCMP1516	202	0.0008
Hordeum vulgare	193	0.0008
Pinus massoniana	193	0.0008
Pteridium aquilinum	192	0.0008
Capsicum chinense	192	0.0008
Cucumis melo	190	0.0008
Brassica oleracea	180	0.0007
Hordeum vulgare subsp. vulgare	175	0.0007
Vigna angularis	172	0.0007
Arabis alpina	167	0.0007
Picea abies	165	0.0007
Cryptomeria japonica	158	0.0006
Davallia tyermannii	156	0.0006
Cunninghamia lanceolata	153	0.0006
Oryza sativa Indica Group	133	0.0005
Trebouxia sp. A1-2	130	0.0005
Parathelypteris nipponica	128	0.0005
Lygodium japonicum	117	0.0005
Chlorella sorokiniana	116	0.0005
Chlamydomonas eustigma	116	0.0005
Marsilea quadrifolia	111	0.0004
Cyrtomium guizhouense	110	0.0004
Raphidocelis subcapitata	103	0.0004
Lotus japonicus	101	0.0004
Tetrabaena socialis	100	0.0004
Micractinium conductrix	99	0.0004
Triticum aestivum	99	0.0004
Chloropicon primus	97	0.0004
Psilotum nudum	97	0.0004
Pohlia nutans	94	0.0004
Larix kaempferi	93	0.0004
Triticum urartu	93	0.0004
Catharanthus roseus	87	0.0003
Adiantum aleuticum	81	0.0003
Pteridium aquilinum subsp. aquilinum	78	0.0003
Gonium pectorale	75	0.0003
Microsorum musifolium	73	0.0003
Taxus x media	70	0.0003
Pinus radiata	70	0.0003
Brassica oleracea var. oleracea	69	0.0003
Polypodium cambricum	67	0.0003
Asplenium scolopendrium	65	0.0003
Capsaspora owczarzaki ATCC 30864	65	0.0003
Boehmeria nivea	64	0.0003
Aphanomyces stellatus	62	0.0002
Blastocystis sp. ATCC 50177/Nand II	60	0.0002
Aphanomyces euteiches	59	0.0002
Arachis ipaensis	58	0.0002
Ceratopteris pteridoides	56	0.0002
Huperzia serrata	55	0.0002
Pityrogramma trifoliata	53	0.0002
Monoraphidium neglectum	53	0.0002
Coccomyxa subellipsoidea C-169	53	0.0002
Selaginella martensii	52	0.0002
Ophioglossum californicum	52	0.0002
Davallia divaricata	52	0.0002
Picea glauca	51	0.0002
Oryza sativa	50	0.0002
Regnellidium diphyllum	49	0.0002
Chlorella variabilis	48	0.0002
Pellia epiphylla	47	0.0002
Torreya grandis	46	0.0002
Polypodium aureum	45	0.0002
Isoetes engelmannii	44	0.0002
Globisporangium splendens	43	0.0002
Phytophthora fragariae	43	0.0002
Ectocarpus sp. CCAP 1310/34	42	0.0002
Taxus baccata	40	0.0002
Picea mariana	39	0.0002
Phytophthora kernoviae 00238/432	39	0.0002
Phytophthora rubi	38	0.0002
Myriopteris rufa	38	0.0002
Microbiota decussata	37	0.0001
Chrysanthemum x morifolium	37	0.0001
Ectocarpus siliculosus	36	0.0001
Ostreococcus tauri	36	0.0001
Adiantum shastense	36	0.0001
Blastocystis hominis	34	0.0001
Thuja plicata	34	0.0001
Guillardia theta CCMP2712	34	0.0001
Calocedrus decurrens	33	0.0001
Taraxacum officinale	31	0.0001
Sphaeroforma arctica JP610	30	0.0001
Onychium japonicum	30	0.0001
Panax ginseng	30	0.0001
Azolla filiculoides	30	0.0001
Salvia miltiorrhiza	30	0.0001
Hyacinthus orientalis	30	0.0001
Dianthus caryophyllus	30	0.0001
Pteris ryukyuensis	30	0.0001
Cafeteria roenbergensis	30	0.0001
Tamarix hispida	29	0.0001
Pinus peuce	29	0.0001
Adiantum tricholepis	29	0.0001
Pythium oligandrum	29	0.0001
Micromonas pusilla CCMP1545	28	0.0001
Fragilariopsis cylindrus CCMP1102	27	0.0001
Gaga arizonica	27	0.0001
Taxus wallichiana	27	0.0001
Coniogramme sp. LL-2018	27	0.0001
Hemionitis subcordata	27	0.0001
Vicia cinerea	27	0.0001
Asplenium nidus	26	0.0001
Nothophytophthora sp. Chile5	26	0.0001
Callitropsis nootkatensis	26	0.0001
Pityrogramma austroamericana	26	0.0001
Pinus lambertiana	25	0.0001
Sticherus bifidus	25	0.0001
Albuca bracteata	24	0.0001
Thraustotheca clavata	24	0.0001
Treubia lacunosa	23	0.0001
Diospyros kaki	23	0.0001
Lygodium flexuosum	23	0.0001
Nannochloropsis salina CCMP1776	23	0.0001
Fistulifera solaris	23	0.0001
Aphanomyces astaci	22	0.0001
Wolffia arrhiza	22	0.0001
Salicornia herbacea	22	0.0001
Caragana korshinskii	21	0.0001
Micromonas commoda	21	0.0001
Saccharum hybrid cultivar R570	21	0.0001
Lilium longiflorum	20	0.0001
Cupressus sempervirens	20	0.0001
Callitropsis funebris	20	0.0001
Osmunda japonica	20	0.0001
Dicksonia antarctica	20	0.0001
Blastocystis sp. subtype 4	19	0.0001
Vigna radiata	19	0.0001
Cinnamomum camphora	19	0.0001
Cupressus duclouxiana	19	0.0001
Osmunda lancea	19	0.0001
Scoparia dulcis	18	0.0001
Hondaea fermentalgiana	18	0.0001
Taxus cuspidata	18	0.0001
Goniophlebium amoenum	18	0.0001
Apium graveolens	18	0.0001
Piper nigrum	18	0.0001
Gracilariopsis chorda	18	0.0001
Ipomoea batatas	18	0.0001
Ostreococcus lucimarinus CCE9901	18	0.0001
Mesembryanthemum crystallinum	18	0.0001
Brassica juncea	17	0.0001
Callitropsis vietnamensis	17	0.0001
Calciphilopteris ludens	17	0.0001
Leuenbergeria lychnidiflora	17	0.0001
Musa acuminata	17	0.0001
Picea wilsonii	17	0.0001
Auxenochlorella protothecoides	17	0.0001
Saccharum hybrid cultivar GT28	16	0.0001
Populus tomentosa	16	0.0001
Hesperocyparis bakeri	16	0.0001
Plagiochasma appendiculatum	16	0.0001
Pisum sativum	16	0.0001
Pseudo-nitzschia multistriata	16	0.0001
Eutrema halophilum	15	0.0001
Juniperus indica	15	0.0001
Blasia pusilla	15	0.0001
Wolffia australiana	15	0.0001
Apostasia odorata	14	0.0001
Adiantum raddianum	14	0.0001
Bryum argenteum	14	0.0001
Cycas revoluta	14	0.0001
Matteuccia struthiopteris	14	0.0001
Nothapodytes nimmoniana	14	0.0001
Oryza minuta	14	0.0001
Cylindrocystis brebissonii	14	0.0001
Vitis arizonica x Vitis rupestris	14	0.0001
Juniperus oxycedrus	14	0.0001
Closterium baillyanum	14	0.0001
Phlegmariurus squarrosus	13	0.0001
Juniperus phoenicea	13	0.0001
Pentagramma triangularis	13	0.0001
Oldenlandia affinis	13	0.0001
Ephedra trifurca	13	0.0001
Gentiana triflora	13	0.0001
Bathycoccus prasinos	13	0.0001
Picea asperata	13	0.0001
Juniperus procera	13	0.0001
Macadamia integrifolia	12	0
Argyrochosma nivea	12	0
Fargesia denudata	12	0
Vaginularia trichoidea	12	0
Eosphagnum rigescens	12	0
Cymbidium ensifolium	12	0
Aphanomyces invadans	12	0
Hesperocyparis macrocarpa	12	0
Alsophila podophylla	12	0
Saccoloma inaequale	12	0
Coleochaete scutata	12	0
Polytrichum commune	12	0
Myriopteris scabra	11	0
Trebouxiophyceae sp. MBIC11204	11	0
Microsorum sp. SU-2018	11	0
Vicia faba	11	0
Marchantia paleacea	11	0
Cheilanthes micropteris	11	0
Phytophthora parasitica	11	0
Saccharum officinarum	11	0
Lilium regale	11	0
Anthoceros agrestis	11	0
Pinellia ternata	11	0
Notholaena montieliae	10	0
Phytophthora megakarya	10	0
Vitis pseudoreticulata	10	0
Larix gmelinii	10	0
Fagopyrum esculentum	10	0
Boechera divaricarpa	10	0
Anthoceros angustus	10	0
Dryopteris caudipinna	10	0
Juniperus microsperma	10	0
Populus davidiana x Populus alba var. pyramidalis	10	0
Juniperus flaccida	10	0
Taiwania cryptomerioides	10	0
Chrysochromulina tobinii	10	0
Nannochloropsis gaditana	10	0
Pinus cembra	10	0
Porphyridium purpureum	10	0
Dryopteris crassirhizoma	10	0
Delphinium semibarbatum	10	0
Ceratodon purpureus	10	0
Juniperus scopulorum	9	0
Phytophthora kernoviae	9	0
Selaginella lepidophylla	9	0
Morus alba var. multicaulis	9	0
Adiantum sp. Qiu 95118	9	0
Haematococcus lacustris	9	0
Buxbaumia aphylla	9	0
Phaeodactylum tricornutum	9	0
Saccharum hybrid cultivar ROC22	9	0
Polygala tenuifolia	9	0
Nicotiana benthamiana	9	0
Ceratophyllum platyacanthum subsp. oryzetorum	9	0
Onoclea sensibilis	9	0
Syntrichia caninervis	9	0
Polystichum lepidocaulon	9	0
Osmunda regalis	9	0
Lilium hybrid cultivar	9	0
Freesia alba	9	0
Sanionia uncinata	9	0
Cryptogramma acrostichoides	9	0
Phytophthora infestans	9	0
Pinus brutia	9	0
Mankyua chejuensis	8	0
Chara vulgaris	8	0
Nitella hyalina	8	0
Gossypium turneri	8	0
Cyanidioschyzon merolae strain 10D	8	0
Phytophthora cactorum	8	0
Linum usitatissimum	8	0
Ipomoea quamoclit	8	0
Lunularia cruciata	8	0
Daucus carota	8	0
Phyllostachys edulis	8	0
Fragaria vesca	8	0
Juniperus drupacea	8	0
Sesbania rostrata	8	0
Gnetum ula	8	0
Conocephalum conicum	8	0
Pinus thunbergii	8	0
Pinus contorta	8	0
Pteris tremula	8	0
Glycyrrhiza uralensis	8	0
Bartramia pomiformis	7	0
Riccia fluitans	7	0
Nepenthes ampullaria	7	0
Haplopteris elongata	7	0
Hesperocyparis arizonica	7	0
Crocus sativus	7	0
Dimocarpus longan	7	0
Ambrosia artemisiifolia	7	0
Cystopteris fragilis	7	0
Sequoia sempervirens	7	0
Pyrrosia longifolia	7	0
Aureococcus anophagefferens	7	0
Brachythecium rivulare	7	0
Paeonia lactiflora	7	0
Diphasiastrum tristachyum	7	0
Spermatozopsis similis	7	0
Sphaeropteris brunoniana	7	0
Tulipa gesneriana	7	0
Pythium insidiosum	7	0
Phytophthora parasitica INRA-310	7	0
Dunaliella salina	7	0
Fragaria x ananassa	6	0
Atrichum angustatum	6	0
Diplazium subserratum	6	0
Boswellia sacra	6	0
Syntrichia ruralis	6	0
Musa ABB Group	6	0
Spirogyra pratensis	6	0
Leucostegia immersa	6	0
Pinus kesiya var. langbianensis	6	0
Galdieria sulphuraria	6	0
Wiesnerella denudata	6	0
Araucaria angustifolia	6	0
Chondrus crispus	6	0
Cinnamomum osmophloeum	6	0
Quercus petraea	6	0
Thuja koraiensis	6	0
Ammopiptanthus mongolicus	6	0
Adiantum trapeziforme	6	0
Sesuvium portulacastrum	6	0
Bartramia patens	6	0
Lagenaria siceraria	6	0
Myriopteris lindheimeri	6	0
Vittaria appalachiana	6	0
Humulus lupulus	5	0
Riccardia latifrons	5	0
Pseudotsuga menziesii	5	0
Codonopsis lanceolata	5	0
Dumortiera hirsuta	5	0
Andreaea wangiana	5	0
Uncaria rhynchophylla	5	0
Pellaea truncata	5	0
Alsophila gigantea	5	0
Llavea cordifolia	5	0
Peronospora effusa	5	0
Fagopyrum tataricum	5	0
Corydalis conspersa	5	0
Pinus strobus	5	0
Thalassiosira oceanica	5	0
Illicium henryi	5	0
Dendrobium hybrid cultivar	5	0
Chlamydomonas sp. UWO 241	5	0
Cucumis melo subsp. melo	5	0
Eustoma exaltatum subsp. russellianum	5	0
Closterium ehrenbergii	5	0
Eleusine indica	5	0
Mangifera indica	5	0
Nothoceros vincentianus	5	0
Phacelia campanularia	5	0
Adiantum caudatum	5	0
Carthamus tinctorius	5	0
Rhachidosorus consimilis	5	0
Phytophthora sojae	4	0
Lolium perenne	4	0
Datisca glomerata	4	0
Sonneratia apetala	4	0
Erodium trifolium	4	0
Lilium davidii var. unicolor	4	0
Ziziphus mauritiana	4	0
Deparia lancea	4	0
Pythium brassicum	4	0
Chionoloma tenuirostre	4	0
Calotropis procera	4	0
Ceanothus thyrsiflorus	4	0
Pandanus utilis	4	0
Alsophila spinulosa	4	0
Paulinella micropora	4	0
Phoebe bournei	4	0
Davallia triphylla	4	0
Rheum australe	4	0
Notholaena standleyi	4	0
Saccharum spontaneum	4	0
Dryopteris intermedia	4	0
Gonatozygon brebissonii	4	0
Eleusine coracana subsp. coracana	4	0
Polystichum tsus-simense	4	0
Camellia nitidissima	4	0
Histiopteris incisa	4	0
Phlebodium aureum	4	0
Bulbophyllum morphologorum	4	0
Pseudostellaria palibiniana	4	0
Lathyrus aphaca	4	0
Podophyllum peltatum	4	0
Suaeda glauca	4	0
Cocos nucifera	4	0
Petunia x hybrida	4	0
Pinus monticola	4	0
Pteridium esculentum subsp. arachnoideum	4	0
Ginkgo	4	0
Beckmannia syzigachne	4	0
Takakia lepidozioides	4	0
Achlya hypogyna	4	0
Delphinium grandiflorum	4	0
Paeonia suffruticosa	4	0
Macrothelypteris torresiana	4	0
Tarenaya spinosa	4	0
Bupleurum falcatum	4	0
Adiantum aethiopicum	4	0
Pteris ensiformis	4	0
Erycina pusilla	4	0
Timmia megapolitana subsp. bavarica	4	0
Polystichum acrostichoides	4	0
Egeria densa	4	0
Xerophyta viscosa	4	0
Jamesonia brasiliensis	4	0
Cycas taitungensis	4	0
Plantago major	4	0
Agarivorans sp. Toyoura001	4	0
Woodsia macrochlaena	4	0
Populus trichocarpa x Populus deltoides	4	0
Phytolacca acinosa	4	0
Beta vulgaris	3	0
Volvox carteri	3	0
Pseudotsuga menziesii var. menziesii	3	0
Helicosporidium sp. ATCC 50920	3	0
Phellodendron amurense	3	0
Polystichum rigens	3	0
Chimonanthus praecox	3	0
Pteris cadieri	3	0
Chlamydomonas incerta	3	0
Plectranthus scutellarioides	3	0
Medicago sativa	3	0
Hedychium coronarium	3	0
Avena sativa	3	0
Lycium barbarum	3	0
Taxodium distichum var. imbricarium	3	0
Syntrichia filaris	3	0
Musa acuminata AAA Group	3	0
Persea americana	3	0
Reboulia hemisphaerica	3	0
Teucrium mascatense	3	0
Hemionitis arifolia	3	0
Oryza rufipogon	3	0
Pyrus communis	3	0
Solanum demissum	3	0
Vernicia montana	3	0
Pinus koraiensis	3	0
Scherffelia dubia	3	0
Taxodium distichum	3	0
Rumohra adiantiformis	3	0
Sphagnum fuscum	3	0
Araucaria heterophylla	3	0
Picea engelmannii x Picea glauca	3	0
Thraustochytrium sp. LLF1b	3	0
Echinocactus platyacanthus	3	0
Thalassiosira pseudonana CCMP1335	3	0
Isochrysis galbana	3	0
Ceratozamia hildae	3	0
Alsophila costularis	3	0
Santalum album	3	0
Zamia erosa	3	0
Oryza officinalis	3	0
Malus hupehensis	3	0
Saccharum hybrid cultivar Co 86032	3	0
Euglena gracilis	3	0
Eleusine coracana	3	0
Osmanthus fragrans	3	0
Phytophthora palmivora var. palmivora	3	0
Eleocharis dulcis	3	0
Gymnosphaera salletii	3	0
Dioscorea esculenta	3	0
Craterostigma plantagineum	3	0
Euphorbia lathyris	3	0
Solanum melongena	3	0
Sabicea diversifolia	3	0
Musa acuminata subsp. burmannicoides	3	0
Chamaecyparis obtusa	3	0
Picrorhiza kurrooa	3	0
Oenothera grandiflora	3	0
Gigaspermum repens	3	0
Selaginella kraussiana	3	0
Saprolegnia diclina VS20	3	0
Racomitrium lanuginosum	3	0
Pinus armandii	3	0
Pinus densiflora var. densiflora	3	0
Pogonatum inflexum	3	0
Vaccinium corymbosum	3	0
Coriandrum sativum	2	0
Solanum cheesmaniae	2	0
Batophora oerstedii	2	0
Davallia yunnanensis	2	0
Ceramium sungminbooi	2	0
Asterella wallichiana	2	0
Chlorella sp. ArM0029B	2	0
Anemia tomentosa	2	0
Silene vulgaris	2	0
Dahlia pinnata	2	0
Podococcus barteri	2	0
Macrotyloma uniflorum	2	0
Adiantum pyramidale	2	0
Musa AB Group	2	0
Platycodon grandiflorus	2	0
Paspalum vaginatum	2	0
Glyptostrobus pensilis	2	0
Bommeria hispida	2	0
Oryza coarctata	2	0
Actinidia deliciosa	2	0
Populus tremuloides	2	0
Digitalis lanata	2	0
Platanus x hispanica	2	0
Sarcandra glabra	2	0
Nemophila menziesii	2	0
Ephedra sinica	2	0
Lolium arundinaceum	2	0
Saccharum hybrid cultivar SP80-3280	2	0
Alsophila latebrosa	2	0
Astragalus sinicus	2	0
Volvox gigas	2	0
Callistopteris apiifolia	2	0
Lepocinclis tripteris	2	0
Anogramma chaerophylla	2	0
Diplazium zanzibaricum	2	0
Ignatius tetrasporus	2	0
Azolla nilotica	2	0
Zygnema circumcarinatum	2	0
Liriodendron chinense	2	0
Struthiopteris spicant	2	0
Dryopteris saxifraga	2	0
Thujopsis dolabrata	2	0
Isoetes lacustris	2	0
Scutellaria baicalensis	2	0
Austroblechnum melanocaulon	2	0
Antirrhinum majus	2	0
Pueraria montana var. lobata	2	0
Populus deltoides	2	0
Vanda coerulea	2	0
Morus indica	2	0
Clitoria ternatea	2	0
Hypseocharis bilobata	2	0
Asclepias syriaca	2	0
Musa AAB Group	2	0
Oleandra articulata	2	0
Pyrrosia subfurfuracea	2	0
Ceratopteris cornuta	2	0
Scutellaria barbata	2	0
Phalaenopsis hybrid cultivar	2	0
Oryza malampuzhaensis	2	0
Glossostigma elatinoides	2	0
Secale cereale	2	0
Hydnora visseri	2	0
Myriopteris covillei	2	0
Euglena longa	2	0
Potamogeton wrightii	2	0
Lindsaea orbiculata	2	0
Betula platyphylla	2	0
Tectaria macrodonta	2	0
Fossombronia foveolata	2	0
Tsuga heterophylla	2	0
Alopecurus myosuroides	2	0
Scytosiphon lomentaria	2	0
Elaeis oleifera	2	0
Persicaria tinctoria	2	0
Camellia fraterna	2	0
Ocimum basilicum	2	0
Zantedeschia aethiopica	2	0
Miscanthus sinensis	2	0
Stipa purpurea	2	0
Salicornia europaea	2	0
Rumex palustris	2	0
Prunus subhirtella	2	0
Ionopsidium savianum	2	0
Alnus glutinosa	2	0
Oncidium hybrid cultivar	2	0
Oryza glaberrima	2	0
Albugo laibachii Nc14	2	0
Saintpaulia	2	0
Aneura pinguis	2	0
Luffa aegyptiaca	2	0
Carthamus persicus	2	0
Nicotiana plumbaginifolia	2	0
Siraitia grosvenorii	2	0
Mesostigma viride	2	0
Pinus palustris	2	0
Eucalyptus camaldulensis	2	0
Plasmopara halstedii	2	0
Andreaea rothii	2	0
Marchantia emarginata	2	0
Croton stellatopilosus	2	0
Metasequoia glyptostroboides	2	0
Vicia sativa	2	0
Sphagnum lenense	2	0
Avena strigosa	2	0
Woodsia scopulina	2	0
Betula luminifera	2	0
Miscanthus sinensis f. glaber	2	0
Lepisorus clathratus	2	0
Citrus junos	2	0
Ornithogalum saundersiae	2	0
Asplenium pekinense	2	0
Taxodium sp. 'Zhongshanshan'	2	0
Sinapis alba	2	0
Phaeodactylum tricornutum CCAP 1055/1	2	0
Salix arbutifolia	2	0
Haplomitrium gibbsiae	2	0
Larix occidentalis	2	0
Morus alba	2	0
Populus balsamifera	2	0
Erodium texanum	2	0
Larix gmelinii var. olgensis	2	0
Senegalia senegal	2	0
Parathelypteris noveboracensis	2	0
Silene littorea	2	0
Mayaca sp. KD-2017	2	0
Pinus bungeana	2	0
Thyrsopteris elegans	2	0
Pilularia americana	2	0
Allium cepa	2	0
Phyllostachys fimbriligula	2	0
Allium sativum	2	0
Euphorbia esula	2	0
Bixa orellana	2	0
Stylosanthes guianensis	2	0
Adiantum pedatum	2	0
Hedera nepalensis	2	0
Miscanthus floridulus	2	0
Hymenophyllum holochilum	1	0
Spirogyra grevilleana	1	0
Vernicia fordii	1	0
Digitaria ciliaris	1	0
Pinus contorta var. bolanderi	1	0
Pinus strobiformis	1	0
Citrus tamurana	1	0
Pelargonium x hortorum	1	0
Ophioglossum reticulatum	1	0
Dictyosphaerium ehrenbergianum	1	0
Sceptridium dissectum	1	0
Datura stramonium	1	0
Trachelomonas grandis	1	0
Lobelia puberula	1	0
Diphyscium foliosum	1	0
Populus tremula x Populus tremuloides	1	0
Callistephus chinensis	1	0
Cuphea hookeriana	1	0
Lophocereus schottii	1	0
Sesamum radiatum	1	0
Draba aizoides	1	0
Sphagnum girgensohnii	1	0
Hylocereus polyrhizus	1	0
Phytophthora cuyabensis	1	0
Phyllostachys prominens	1	0
Abies alba	1	0
Bowenia serrulata	1	0
Oryza australiensis	1	0
Prototheca blaschkeae	1	0
Malcolmia maritima	1	0
Gladiolus grandiflorus	1	0
Populus davidiana	1	0
Vandenboschia radicans	1	0
Aquilaria sinensis	1	0
Chandrasekharania keralensis	1	0
Woodsia polystichoides	1	0
Abies grandis	1	0
Cryptogramma crispa	1	0
Calypogeia arguta	1	0
Leucobryum juniperoideum	1	0
Lindsaea microphylla	1	0
Amaranthus tuberculatus	1	0
Dioscorea composita	1	0
Cyclamen persicum	1	0
Gnetum parvifolium	1	0
Cabomba caroliniana	1	0
Tapiscia sinensis	1	0
Adiantum induratum	1	0
Roya anglica	1	0
Gelidium gabrielsonii	1	0
Liagora brachyclada	1	0
Ipomoea pes-caprae	1	0
Sonneratia alba	1	0
Echinacea angustifolia	1	0
Primulina verecunda	1	0
Prunus armeniaca	1	0
Euonymus japonicus	1	0
Camptotheca acuminata	1	0
Calystegia soldanella	1	0
Diplazium tomentosum	1	0
Hybanthus enneaspermus	1	0
Acetabularia acetabulum	1	0
Cyperus difformis	1	0
Calamus jenkinsianus	1	0
Lygodium microphyllum	1	0
Tradescantia hirsutiflora	1	0
Aponogeton madagascariensis	1	0
Microsorum grossum	1	0
Phacus pleuronectes	1	0
Prunus salicina	1	0
Rosa rugosa	1	0
Diplazium sibiricum	1	0
Zea mays subsp. mays	1	0
Plectranthus barbatus	1	0
Plenasium javanicum	1	0
Lilium parryi	1	0
Phaeoceros laevis	1	0
Ismene longipetala	1	0
Pistacia chinensis	1	0
Pyropia yezoensis	1	0
Lemna gibba	1	0
Huperzia lucidula	1	0
Antrophyum latifolium	1	0
Nephrolepis rivularis	1	0
Aralia elata	1	0
Stellaria longipes	1	0
Barbula unguiculata	1	0
Iris x hollandica	1	0
Cyanidium caldarium	1	0
Olea europaea	1	0
Arachis diogoi	1	0
Penium margaritaceum	1	0
Polypodium amorphum	1	0
Miscanthus transmorrisonensis	1	0
Oryza punctata	1	0
Doryanthes excelsa	1	0
Populus tremula x Populus alba	1	0
Mirabilis jalapa	1	0
Chlorokybus atmophyticus	1	0
Cynodon dactylon x Cynodon transvaalensis	1	0
Picea likiangensis var. rubescens	1	0
Taraxacum kok-saghyz	1	0
Eriobotrya japonica	1	0
Acrostichum aureum	1	0
Viola pubescens	1	0
Nephroselmis olivacea	1	0
Leptopteris wilkesiana	1	0
Neurachne minor	1	0
Sampaiella trichoclada	1	0
Bracteacoccus aerius	1	0
Ipomoea sp. Kenyan	1	0
Pinus bhutanica	1	0
Pelargonium citronellum	1	0
Phelipanche ramosa	1	0
Leiosporoceros dussii	1	0
Lycopodium sp. JL-2005	1	0
Sabia sp. Qiu 91025	1	0
Aristolochia ringens	1	0
Pleurozia purpurea	1	0
Pyrrosia lingua	1	0
Acorus calamus	1	0
Atrichum selwynii	1	0
Andreaea nivalis	1	0
Conocephalum japonicum	1	0
Lithothamnion sp.	1	0
Neolamarckia cadamba	1	0
Hymenasplenium unilaterale	1	0
Pogonatherum paniceum	1	0
Amentotaxus yunnanensis	1	0
prasinophyte sp. RS-11	1	0
Asplenium platyneuron	1	0
Brassica rapa subsp. pekinensis	1	0
Zamia furfuracea	1	0
Primulina lutea	1	0
Rhodiola rosea	1	0
Scoliosorus ensiformis	1	0
Carteria sp. SAG 8-5	1	0
Albugo candida	1	0
Tanacetum cinerariifolium	1	0
Scapania griffithii	1	0
Eranthis hyemalis	1	0
Rhodomela confervoides	1	0
Botrychium sp. ternatum/japonicum	1	0
Vitis labrusca	1	0
Selliguea enervis	1	0
Mickelia scandens	1	0
Lycium ruthenicum	1	0
Ammopiptanthus nanus	1	0
Geissaspis tenella	1	0
Pinus pinea	1	0
Ophiorrhiza pumila	1	0
Polystichum gelidum	1	0
Hyaloperonospora arabidopsidis Emoy2	1	0
Centella asiatica	1	0
Cuscuta sandwichiana	1	0
Pteridium aquilinum subsp. japonicum	1	0
Vanda hybrid cultivar	1	0
Oberonia japonica	1	0
Conophytum uviforme	1	0
Flatbergium sericeum	1	0
Asplenium prolongatum	1	0
Ipomoea alba	1	0
Gentiana macrophylla	1	0
Ipomoea nervosa	1	0
Pachyrhizus erosus	1	0
Buxus sinica	1	0
Chrysanthemodiscus sp. HK171	1	0
Erythranthe lewisii	1	0
Polytrichum juniperinum	1	0
Lamium galeobdolon	1	0
Dendrobium officinale	1	0
Amsonia hubrichtii	1	0
Scutellaria tashiroi	1	0
Rhizophora mangle	1	0
Gossypium barbadense var. brasiliense	1	0
Pinus banksiana	1	0
Leucosceptrum canum	1	0
Chorispora bungeana	1	0
Amorphophallus konjac	1	0
Selaginella indica	1	0
Spirogyra sp. KG0101	1	0
Kuruna debilis	1	0
Pelargonium tetragonum	1	0
Oliveria decumbens	1	0
Abelmoschus esculentus	1	0
Primulina spadiciformis	1	0
Narcissus tazetta	1	0
Tabernaemontana elegans	1	0
synthetic construct	1	0
Lilium formosanum x Lilium longiflorum	1	0
Hafniomonas laevis	1	0
Leymus chinensis	1	0
Sandersonia aurantiaca	1	0
Amphora coffeiformis	1	0
Cyanophora tetracyanea	1	0
Pinus sp. 2 NZ-2015	1	0
Phaeoceros carolinianus	1	0
Caragana jubata	1	0
Dioscorea polystachya	1	0
Trollius ledebouri	1	0
Sphagnum squarrosum	1	0
Campanula laciniata	1	0
Lobelia heterophylla subsp. heterophylla	1	0
Agave amica	1	0
Vitis amurensis	1	0
Salsola affinis	1	0
Leavenworthia alabamica	1	0
Datura metel	1	0
Melianthus villosus	1	0
Tulipa fosteriana	1	0
Bambusa oldhamii	1	0
Plagiogyria glauca	1	0
Asplenium dalhousiae	1	0
Selaginella apoda	1	0
Rosa x borboniana	1	0
Robinia pseudoacacia	1	0
Phytophthora infestans T30-4	1	0
Polystichum longifrons	1	0
Raphanus sativus var. niger	1	0
Zamia angustifolia	1	0
Dicranopteris linearis	1	0
Chlamydomonas sp. ICE-L	1	0
Cuscuta bonafortunae	1	0
Phlebodium pseudoaureum	1	0
Diphasiastrum digitatum	1	0
Danaea nodosa	1	0
Lupinus luteus	1	0
Tryonia myriophylla	1	0
Adiantum flabellulatum	1	0
Pteridium aquilinum subsp. decompositum	1	0
Volvox ferrisii	1	0
Morus alba var. atropurpurea	1	0
Vincetoxicum mongolicum	1	0
Rosa hybrid cultivar	1	0
Silene latifolia subsp. alba	1	0
Geranium platypetalum	1	0
Chloroparvula sp. RCC696	1	0
Athyrium monomachi	1	0
Pyrrosia angustissima	1	0
Lobelia laxa	1	0
Christensenia aesculifolia	1	0
Citrus aurantium	1	0
Klebsormidium sp. SAG 51.86	1	0
Cenchrus ciliaris	1	0
Chloranthus japonicus	1	0
Cenchrus purpureus	1	0
Pyramimonas parkeae	1	0
Hordeum vulgare subsp. spontaneum	1	0
Utricularia reniformis	1	0
Thuja occidentalis	1	0
Corylus heterophylla x Corylus avellana	1	0
Botryococcus braunii Showa	1	0
Sorbus aucuparia	1	0
Nicotiana raimondii	1	0
Nicotiana alata	1	0
Phragmites australis	1	0
Polystichum fibrillosopaleaceum	1	0
Harpanthus flotovianus	1	0
Ricciocarpos natans	1	0
Elliptochloris bilobata	1	0
Marsilea drummondii	1	0
Tripterygium wilfordii	1	0
Malus sieversii	1	0
Ettlia sp. YC001	1	0
Polypodium hesperium	1	0
Plantago cunninghamii	1	0
Sphagnum balticum	1	0
Poa pratensis subsp. angustifolia	1	0
Pinus canariensis	1	0
Larix decidua	1	0
Xerophyta humilis	1	0
Lycoris radiata	1	0
Salvia uliginosa	1	0
Crocus ancyrensis	1	0
Acromastigum furcatifolium	1	0
Dianthus chinensis	1	0
Brassica rapa subsp. oleifera	1	0
Planctonema lauterbornii	1	0
Andrographis paniculata	1	0
Zingiber officinale	1	0
Iris germanica	1	0
Frullania orientalis	1	0
Solanum nigrum	1	0
Viscum album subsp. album	1	0
Pinus resinosa	1	0
Ocimum tenuiflorum	1	0
Ulva compressa	1	0
Pelargonium cotyledonis	1	0
Haloxylon ammodendron	1	0
Lycopersicon	1	0
Vallisneria americana	1	0
Tetragonia tetragonoides	1	0
Picea smithiana	1	0
Drynaria sinica	1	0
Magnolia denudata	1	0
Withania somnifera	1	0
Cyperus esculentus var. sativus	1	0
Taxodium distichum var. distichum	1	0
Monsonia emarginata	1	0
Silybum marianum	1	0
Actaea racemosa	1	0
Lepidium sativum	1	0
Wendtia gracilis	1	0
Petroselinum crispum	1	0
Papaver rhoeas	1	0
Rytidosperma gracile	1	0
Ministeria vibrans	1	0
Actinostachys pennula	1	0
Zamia integrifolia	1	0
Mnium sp. Qiu 94079	1	0
Isatis tinctoria	1	0
Keteleeria fortunei var. oblonga	1	0
Phytophthora parasitica P1569	1	0
Aegiceras corniculatum	1	0
Gladiolus hybrid cultivar	1	0
Closterium peracerosum-strigosum-littorale complex	1	0
Selaginella tamariscina	1	0
Pogonatum japonicum	1	0
Athyrium sinense	1	0
Saccharum hybrid cultivar CP65-357	1	0
Arabidopsis halleri	1	0
Oryza latifolia	1	0
Pyrus pyrifolia	1	0
Hyoscyamus niger	1	0
Prunella vulgaris	1	0
Epipremnum aureum	1	0
Bremia lactucae	1	0
Kalanchoe fedtschenkoi	1	0
Tulipa humilis var. pulchella	1	0
Eucommia ulmoides	1	0
Descurainia sophia	1	0
Undaria pinnatifida	1	0
Prionium serratum	1	0
Polygonum cuspidatum	1	0
Saprolegnia parasitica CBS 223.65	1	0
Welwitschia mirabilis	1	0
Astragalus membranaceus	1	0
Gracilaria changii	1	0
Breonia chinensis	1	0
Agarophyton vermiculophyllum	1	0
Isopterygiopsis muelleriana	1	0
Dictyosperma album	1	0
Pinus mugo	1	0
Zygodon viridissimus	1	0
Chenopodium hians	1	0
Masdevallia picturata	1	0
Nicotiana miersii	1	0
Amaranthus cruentus/Amaranthus hypocondriacus mixed library	1	0
Aegilops tauschii	1	0
Eucalyptus pyrocarpa	1	0
Vitis flexuosa	1	0
Coscinodon cribrosus	1	0
Saccharum hybrid cultivar	1	0
Loeskeobryum cavifolium	1	0
Pontederia crassipes	1	0
Lonicera macranthoides	1	0
Pemphis acidula	1	0
Clarkia breweri	1	0
Ixeris	1	0
Rehmannia glutinosa	1	0
Mantoniella squamata	1	0
Triticum monococcum	1	0
Alangium platanifolium	1	0
Mougeotia scalaris	1	0
Cynanchum auriculatum	1	0
Haplomitrium mnioides	1	0
Ostrya virginiana	1	0
Mentha x piperita	1	0
Selaginella pulvinata	1	0
Taraxacum japonicum	1	0
Vittaria graminifolia	1	0
Haplopteris volkensii	1	0
Entransia fimbriata	1	0
Salvinia cucullata	1	0
Echinochloa crus-galli	1	0
Pentapharsodinium dalei	1	0
Coffea mannii	1	0
Gymnomitrion concinnatum	1	0
Cucurbita pepo	1	0
Pteris cretica	1	0
Cyathea smithii	1	0
Ipomoea sp. ML-2019	1	0
Desmodium velutinum	1	0
Azolla mexicana	1	0
Gentiana rigescens	1	0
Asplenium yunnanense	1	0
Cymbidium sinense	1	0
Botrychium lunaria	1	0
Pinus elliottii	1	0
Cenchrus americanus	1	0
Allium macrostemon	1	0
Phytophthora parasitica P10297	1	0
Larix x marschlinsii	1	0
Tagetes patula	1	0
Hylocereus undatus	1	0
Sinopodophyllum hexandrum	1	0
Polypodium glycyrrhiza	1	0
Sphagnum cuspidatum	1	0
Mielichhoferia elongata	1	0
Dicranum scoparium	1	0
Abies firma	1	0
Gardenia jasminoides	1	0
Populus nigra	1	0
Piper colubrinum	1	0
Jasminum sambac	1	0
Lolium multiflorum	1	0
Lobelia cardinalis	1	0
Cardamine hirsuta	1	0
Rhipilia penicilloides	1	0
Phalaenopsis aphrodite subsp. formosana	1	0
Brassica rapa var. rapa	1	0
Podocarpus lambertii	1	0
Prosaptia palauensis	1	0
Hydrilla verticillata	1	0
Paphiopedilum niveum	1	0
Cistanche tubulosa	1	0
Populus yatungensis	1	0
Fritillaria unibracteata	1	0
Rhododendron dauricum	1	0
Ostreobium sp. HV05007a	1	0
Gunnera manicata	1	0
Malus zumi	1	0
Stangeria eriopus	1	0
Fragaria iinumae	1	0
Litchi chinensis	1	0
Ruta graveolens	1	0
Parietaria judaica	1	0
Dendrobium nobile	1	0
Salicornia veneta	1	0
Vigna mungo	1	0
