# Supplementary material for: Full-length transcriptome analysis of Adiantum flabellulatum gametophyte
Source: PeerJ. 2022 Mar 9;10:e13079. doi: 10.7717/peerj.13079 (PMC8917799; doi:10.7717/peerj.13079)
Supplement: Supplemental Information 6 [file peerj-10-13079-s006.xlsx]

## Sheet: Table.S5
Table S6 112 839 transcripts were annotated to 137 KEGG pathways
ID	Pathway_ID
isoform_10	ko04144
isoform_100	ko03013
isoform_100000	ko03020
isoform_100003	ko00020	ko00270	ko00620	ko00630	ko00710	ko01100	ko01110	ko01200
isoform_100004	ko00195	ko01100
isoform_100005	ko03010
isoform_100006	ko00760	ko01100
isoform_100010	ko04120
isoform_100011	ko00460
isoform_100014	ko00562	ko01100
isoform_100017	ko00190	ko01100
isoform_100020	ko03050
isoform_10003	ko00360	ko00940	ko01100	ko01110
isoform_100030	ko04120
isoform_100033	ko03010
isoform_100038	ko03010
isoform_100041	ko03010
isoform_100050	ko03020
isoform_100051	ko00061	ko01100	ko01212
isoform_100058	ko00195	ko01100
isoform_10006	ko00564	ko01100
isoform_100064	ko00195
isoform_100067	ko00010	ko00030	ko00051	ko00710	ko01100	ko01110	ko01200
isoform_100069	ko00196
isoform_100070	ko00904	ko01100	ko01110
isoform_100072	ko03010
isoform_100078	ko00230
isoform_100079	ko03010
isoform_100083	ko00910
isoform_100089	ko03060
isoform_10009	ko00500	ko01100	ko01110
isoform_100091	ko00510	ko01100
isoform_100092	ko00196	ko01100
isoform_100095	ko03010
isoform_100097	ko03018
isoform_1001	ko03040
isoform_10010	ko04075
isoform_100104	ko03010
isoform_100108	ko03040
isoform_100111	ko03013
isoform_100114	ko03060
isoform_100121	ko00040
isoform_100122	ko00040	ko00052	ko00500	ko00520	ko01100	ko03010
isoform_100133	ko03060	ko04141	ko04145
isoform_100137	ko00561	ko00564	ko01100	ko01110
isoform_100138	ko03010
isoform_100139	ko04145
isoform_10014	ko00380	ko01100
isoform_100144	ko00195	ko01100
isoform_100148	ko00940	ko00941	ko00945	ko01100	ko01110
isoform_10015	ko03008
isoform_100151	ko03022
isoform_100152	ko04144
isoform_100155	ko03010
isoform_100160	ko04141
isoform_100169	ko04144
isoform_10017	ko03013	ko03015	ko03018
isoform_10018	ko00130	ko00360	ko00940	ko01100	ko01110
isoform_100180	ko00270	ko01100	ko01110	ko02010
isoform_100181	ko00970	ko01100
isoform_100182	ko03013
isoform_100183	ko04146
isoform_100190	ko00564	ko00565	ko00590	ko00591	ko00592	ko01100	ko01110
isoform_100191	ko00190	ko01100
isoform_100192	ko03020
isoform_100199	ko03010
isoform_1002	ko00500	ko01100
isoform_10020	ko00564
isoform_100203	ko04141	ko04626
isoform_100206	ko00220	ko01100	ko01110	ko01210	ko01230
isoform_100209	ko03040	ko04141	ko04144
isoform_100214	ko00190	ko01100
isoform_100217	ko03010
isoform_100218	ko00860	ko01100	ko01110
isoform_10022	ko03410
isoform_100220	ko03040
isoform_100221	ko00564	ko00565	ko01100	ko01110	ko04144
isoform_100222	ko03040
isoform_100225	ko03040
isoform_100226	ko00562	ko01100	ko04070
isoform_100227	ko03410
isoform_100228	ko00592	ko01100	ko01110
isoform_100229	ko03010
isoform_10023	ko00260	ko00620	ko00630	ko01100	ko01110	ko01200	ko01230
isoform_100232	ko00010	ko00051	ko00562	ko00710	ko01100	ko01110	ko01200	ko01230	ko04144
isoform_100236	ko03010
isoform_100240	ko03010
isoform_100242	ko00195	ko01100
isoform_100244	ko00190	ko01100
isoform_100247	ko00944
isoform_100248	ko03010
isoform_100253	ko00195	ko01100
isoform_100254	ko03010
isoform_100258	ko00190	ko00195	ko01100
isoform_100259	ko00900	ko01100	ko01110
isoform_100263	ko00062	ko01100	ko01212
isoform_100265	ko03020
isoform_100269	ko00190	ko01100
isoform_10027	ko04016	ko04626
isoform_100281	ko00941	ko01100	ko01110
isoform_100282	ko04016	ko04070	ko04626
isoform_100283	ko03010
isoform_100285	ko03010
isoform_100286	ko00270	ko01100	ko01110	ko01230
isoform_100288	ko04141	ko04626
isoform_1003	ko00190	ko01100
isoform_100303	ko04016	ko04070	ko04626
isoform_100305	ko00061	ko00780	ko01100	ko01212
isoform_10031	ko04075
isoform_100311	ko00910
isoform_100312	ko00196	ko01100
isoform_100314	ko00190	ko01100
isoform_100318	ko00260	ko01100	ko01200	ko01230
isoform_100321	ko00270	ko01100
isoform_100322	ko03010
isoform_100332	ko03040	ko04141	ko04144
isoform_100334	ko03010
isoform_100336	ko00960	ko01100	ko01110
isoform_100339	ko00190	ko01100	ko04145
isoform_100351	ko00195
isoform_100352	ko00460	ko00500	ko00940	ko01100	ko01110
isoform_100353	ko00910
isoform_100357	ko03050	ko03440
isoform_100358	ko00480
isoform_100360	ko03013	ko03015	ko03018
isoform_100361	ko00195	ko01100
isoform_100367	ko00190	ko01100
isoform_100368	ko03010
isoform_10037	ko03040	ko04141	ko04144
isoform_100376	ko00860	ko01100	ko01110
isoform_100379	ko00910
isoform_10038	ko04016
isoform_100383	ko00010	ko00030	ko00051	ko00052	ko01100	ko01110	ko01200	ko01230	ko03018
isoform_100385	ko00010	ko00052	ko01100	ko01110
isoform_100386	ko00040	ko00053	ko00860	ko00908	ko01100	ko01110
isoform_100389	ko00511	ko03015
isoform_100390	ko00500	ko01100	ko01110
isoform_100392	ko04145
isoform_100397	ko00040	ko01100
isoform_100402	ko03010
isoform_100406	ko00040	ko01100
isoform_10041	ko00010	ko00230	ko00620	ko01100	ko01110	ko01200	ko01230
isoform_100410	ko03020
isoform_100413	ko00290	ko00650	ko00660	ko00770	ko01100	ko01110	ko01210	ko01230
isoform_100414	ko00190
isoform_100418	ko00592	ko01100	ko01110
isoform_100420	ko01100
isoform_100421	ko04141
isoform_100425	ko04146
isoform_100427	ko03040
isoform_100440	ko03060
isoform_100443	ko04075
isoform_10045	ko00500	ko01100
isoform_100455	ko00940	ko01100	ko01110
isoform_100458	ko03010
isoform_100465	ko00510	ko01100	ko04141
isoform_100472	ko00061	ko00780	ko01100	ko01212
isoform_100474	ko03008
isoform_100477	ko00564	ko01110
isoform_100479	ko00040	ko01100
isoform_10048	ko04144
isoform_100482	ko00195
isoform_100483	ko00040	ko00051	ko00052	ko00561	ko00790	ko01100
isoform_100485	ko00760	ko01100
isoform_100488	ko00190	ko01100
isoform_10049	ko03008
isoform_100490	ko01100	ko01110
isoform_100494	ko04016	ko04070	ko04626
isoform_100496	ko00195	ko01100
isoform_100497	ko03008	ko03013	ko03015
isoform_100498	ko00520	ko00910	ko01100	ko04016
isoform_1005	ko00500	ko01100
isoform_100502	ko04146
isoform_100507	ko04016	ko04075
isoform_100509	ko00561	ko01100
isoform_10051	ko00190	ko01100
isoform_100510	ko03008
isoform_100517	ko03060
isoform_10052	ko00510	ko01100	ko04141
isoform_100523	ko00562	ko01100
isoform_100525	ko00040	ko01100
isoform_100526	ko03010
isoform_100529	ko00010	ko00040	ko00561	ko01100	ko01110
isoform_100530	ko00195	ko01100
isoform_100531	ko04120
isoform_100532	ko03010
isoform_100534	ko00260	ko00460	ko00630	ko00670	ko01100	ko01110	ko01200	ko01230
isoform_100535	ko00350	ko00360
isoform_100540	ko00190	ko01100
isoform_100545	ko00195	ko01100
isoform_100548	ko00030	ko00040	ko00710	ko01100	ko01110	ko01200	ko01230
isoform_100549	ko03013
isoform_100552	ko03020
isoform_100554	ko03013	ko03015	ko04144	ko04145
isoform_100555	ko00010	ko00071	ko00350	ko01100	ko01110	ko01200
isoform_100557	ko00196	ko01100
isoform_100563	ko00500	ko01100	ko01110
isoform_100567	ko03040
isoform_100570	ko00500	ko01100
isoform_100571	ko04075
isoform_100572	ko00562	ko01100
isoform_100573	ko03010
isoform_100580	ko00510	ko01100
isoform_100582	ko03060	ko04141	ko04145
isoform_100589	ko00010	ko01100	ko01110
isoform_10059	ko04016
isoform_10060	ko00520	ko01100
isoform_100600	ko04120	ko04141
isoform_100604	ko04144	ko04145
isoform_100606	ko00592	ko01100	ko01110
isoform_100609	ko00190	ko01100
isoform_100610	ko00230	ko00240	ko01100	ko01110	ko04016
isoform_100611	ko00040	ko01100
isoform_100615	ko00100	ko01110
isoform_10062	ko00020	ko00630	ko01100	ko01110	ko01200	ko01210	ko01230
isoform_100620	ko03022
isoform_100621	ko03010
isoform_100630	ko04141
isoform_100631	ko04130
isoform_100632	ko03010
isoform_100633	ko00240	ko00500	ko01100
isoform_100640	ko00500	ko01100
isoform_100641	ko00195	ko01100
isoform_100642	ko03018	ko03040
isoform_100643	ko03010
isoform_100644	ko00190	ko01100
isoform_100646	ko00190	ko01100
isoform_100649	ko00960	ko01100	ko01110
isoform_10065	ko03013
isoform_100651	ko00940	ko01100	ko01110
isoform_100653	ko00910
isoform_100654	ko04075
isoform_100655	ko00260	ko00630	ko00670	ko01100	ko01110	ko01200
isoform_100658	ko00190	ko01100
isoform_100662	ko00260	ko00630	ko01100	ko01110	ko01200
isoform_100668	ko03010
isoform_100669	ko00230	ko00740	ko01100
isoform_100675	ko03040
isoform_100677	ko00941	ko01100	ko01110	ko04712
isoform_100680	ko04130
isoform_100685	ko03010
isoform_100687	ko00062	ko01040	ko01100	ko01110	ko01212
isoform_100688	ko00040	ko01100	ko03013
isoform_100693	ko00020	ko00190	ko01100	ko01110	ko01200
isoform_100698	ko00190	ko01100	ko04145
isoform_100707	ko04144	ko04145
isoform_100709	ko00906	ko01100	ko01110
isoform_100713	ko00908	ko00941	ko01110
isoform_100724	ko00860	ko01100	ko01110
isoform_100725	ko00195	ko01100
isoform_100729	ko03040
isoform_10073	ko04626
isoform_100733	ko03040
isoform_100736	ko00510	ko00563	ko01100
isoform_10074	ko03013
isoform_100746	ko00196	ko01100
isoform_100747	ko00061	ko00780	ko01100	ko01212
isoform_100748	ko03013
isoform_100753	ko03020
isoform_100755	ko00130	ko01100	ko01110
isoform_100757	ko00340	ko01100	ko01110	ko01230
isoform_100760	ko03060
isoform_100765	ko00190	ko00195	ko01100
isoform_100769	ko03010
isoform_10077	ko03013	ko03020
isoform_100772	ko00900	ko01100	ko01110
isoform_100778	ko03010
isoform_10078	ko03020
isoform_100780	ko00380	ko00905	ko00940	ko01100	ko01110
isoform_100781	ko00400	ko01100	ko01110	ko01230
isoform_100782	ko00910
isoform_100785	ko04120
isoform_100786	ko04122
isoform_100788	ko00195	ko01100
isoform_100789	ko00195
isoform_10079	ko04626
isoform_100790	ko00564	ko00565	ko01100
isoform_100791	ko03010
isoform_100794	ko01100
isoform_100797	ko03010
isoform_10080	ko03010
isoform_100805	ko00500
isoform_100806	ko03013
isoform_10081	ko03013
isoform_100820	ko04144
isoform_100825	ko03013
isoform_100826	ko03013
isoform_100831	ko03010
isoform_100834	ko04146
isoform_100838	ko00510	ko01100	ko04141
isoform_10084	ko00970	ko01100
isoform_100840	ko00196	ko01100
isoform_100841	ko00860	ko01100	ko01110
isoform_100847	ko00520	ko00910	ko01100	ko04016
isoform_100850	ko00020	ko00480	ko01100	ko01110	ko01200	ko01210	ko01230	ko04146
isoform_100851	ko04626
isoform_100855	ko00190	ko01100
isoform_100856	ko00905	ko01100	ko01110
isoform_100857	ko00940	ko01100	ko01110
isoform_100860	ko03010
isoform_100862	ko00010	ko00051	ko00562	ko00710	ko01100	ko01110	ko01200	ko01230	ko04626
isoform_100863	ko00030	ko00710	ko01100	ko01110	ko01200	ko01230
isoform_100867	ko00196	ko01100
isoform_100869	ko00195	ko01100
isoform_10087	ko04016	ko04075
isoform_100871	ko00760	ko01100	ko03040
isoform_100872	ko04145
isoform_100874	ko00040	ko00052	ko00500	ko00520	ko01100	ko03010
isoform_100876	ko04120	ko04141
isoform_10088	ko00670	ko01100	ko01200
isoform_100882	ko03018
isoform_100885	ko03010
isoform_10089	ko04626
isoform_100890	ko01040	ko01212
isoform_100895	ko00220	ko00250	ko00270	ko00330	ko00350	ko00360	ko00400	ko00950	ko00960	ko01100	ko01110	ko01210	ko01230
isoform_100899	ko03022
isoform_100900	ko03018	ko03040
isoform_100904	ko00940	ko01100	ko01110
isoform_100913	ko00190	ko01100
isoform_100914	ko00130	ko01100	ko01110
isoform_100916	ko04144
isoform_10092	ko03013	ko03015	ko03040
isoform_100923	ko03010
isoform_100924	ko00941	ko01100	ko01110	ko04712
isoform_100928	ko00190	ko01100
isoform_100930	ko00860	ko01100	ko01110
isoform_100931	ko00195	ko01100
isoform_100936	ko03018
isoform_100937	ko00196	ko01100
isoform_100941	ko03010
isoform_100944	ko03050	ko03440
isoform_100946	ko03010
isoform_100948	ko00460	ko00500	ko00940	ko01100	ko01110
isoform_10095	ko04075
isoform_100954	ko00100	ko01100	ko01110
isoform_100957	ko00940	ko01110	ko02010
isoform_100959	ko00053	ko01100
isoform_10096	ko03450
isoform_100962	ko03010
isoform_100967	ko00195	ko01100
isoform_10097	ko00030	ko00710	ko01100	ko01110	ko01200	ko01230
isoform_100972	ko04120
isoform_100973	ko03010
isoform_100974	ko04136
isoform_100978	ko00220	ko00250	ko00630	ko00910	ko01100	ko01230
isoform_100979	ko00350	ko00360
isoform_100984	ko00010	ko00020	ko00620	ko01100	ko01110	ko01200
isoform_100986	ko01040	ko01212
isoform_100987	ko00562	ko01100	ko04070
isoform_100994	ko00970
isoform_100996	ko00940	ko01100	ko01110
isoform_100997	ko00010	ko00020	ko00620	ko01100	ko01110	ko01200
isoform_100998	ko04141
isoform_101	ko03013
isoform_1010	ko04626
isoform_101001	ko00196
isoform_101003	ko00906	ko01100	ko01110
isoform_101006	ko00190	ko01100	ko04145
isoform_101008	ko03013
isoform_101013	ko03010
isoform_101014	ko03010
isoform_101017	ko03050	ko03440
isoform_10102	ko00030	ko00710	ko01100	ko01110	ko01200	ko01230
isoform_101021	ko03010
isoform_101022	ko04136
isoform_101025	ko04144
isoform_10103	ko00010	ko00620	ko00630	ko01100	ko01110	ko01200
isoform_101032	ko00190	ko01100
isoform_101033	ko03020
isoform_10104	ko00860	ko01100	ko01110
isoform_101042	ko00340	ko01100	ko01110	ko01230
isoform_101045	ko00910
isoform_101046	ko00670	ko00970
isoform_101050	ko00740	ko01100
isoform_101051	ko00010	ko00020	ko00620	ko00710	ko01100	ko01110	ko01200
isoform_101066	ko03010
isoform_10107	ko00290	ko00770	ko01100	ko01110	ko01210	ko01230
isoform_101078	ko00460	ko00500	ko00940	ko01100	ko01110
isoform_101079	ko00402	ko00941	ko00942	ko01110
isoform_101080	ko00040
isoform_101084	ko00511
isoform_101085	ko00620
isoform_101086	ko03030	ko03410	ko03420	ko03430	ko03440
isoform_101087	ko03010
isoform_101094	ko04120
isoform_101097	ko03040
isoform_1011	ko04120
isoform_10110	ko00230	ko00240	ko01100
isoform_101105	ko03050	ko03440
isoform_101108	ko00500	ko00520	ko01100	ko01110
isoform_101109	ko00592	ko01100	ko01110
isoform_10111	ko03015
isoform_101111	ko00330	ko00480	ko01100	ko01110
isoform_101113	ko03040
isoform_101120	ko03020
isoform_101128	ko03040
isoform_10113	ko03060
isoform_101137	ko03013	ko03015	ko04144	ko04145
isoform_101146	ko03010
isoform_101147	ko04120	ko04141
isoform_101148	ko00270	ko00450	ko01100	ko01110	ko01230
isoform_101149	ko00061	ko00780	ko00960	ko01100	ko01110	ko01212
isoform_10115	ko03013	ko03410
isoform_101151	ko03040
isoform_101152	ko03010
isoform_101156	ko00440	ko00564	ko01100
isoform_101157	ko04146
isoform_10116	ko03013	ko03015	ko03018
isoform_101160	ko00190
isoform_101166	ko00020	ko00480	ko01100	ko01110	ko01200	ko01210	ko01230	ko04146
isoform_101169	ko00220	ko01100	ko01110	ko01230
isoform_10117	ko00941	ko01100	ko01110
isoform_101170	ko00196
isoform_101172	ko01100
isoform_101173	ko00592	ko01100	ko01110
isoform_101176	ko03020
isoform_101180	ko03018
isoform_101184	ko03040
isoform_101187	ko04144
isoform_101189	ko04141
isoform_10119	ko03410
isoform_101193	ko00190	ko01100	ko04145
isoform_101195	ko00190	ko01100
isoform_1012	ko04120
isoform_101202	ko00190	ko01100
isoform_101203	ko00195	ko01100
isoform_101204	ko04141
isoform_101206	ko00630	ko00710	ko01100	ko01200
isoform_101207	ko03010
isoform_10121	ko03018
isoform_101213	ko04016	ko04070	ko04626
isoform_101217	ko04141
isoform_101221	ko03013
isoform_101223	ko00520
isoform_101226	ko03010
isoform_101228	ko00970
isoform_101230	ko03010
isoform_101233	ko00630	ko00710	ko00941	ko01100	ko01110	ko01200
isoform_101241	ko00196
isoform_101242	ko04141
isoform_101247	ko00196	ko01100
isoform_101250	ko00195	ko01100
isoform_101264	ko00130	ko00260	ko00350	ko00360	ko00630	ko00960	ko01100	ko01110	ko01200
isoform_101265	ko00190	ko01100	ko04145
isoform_101269	ko03022
isoform_10127	ko04016
isoform_101281	ko00564	ko00565	ko01100
isoform_101286	ko03013	ko03015
isoform_10129	ko04141	ko04626
isoform_101291	ko03010
isoform_101293	ko00195	ko01100
isoform_101295	ko03010
isoform_101297	ko00500
isoform_101299	ko00380	ko00565	ko00600	ko00966	ko01100	ko01110	ko01210
isoform_1013	ko00052	ko00511	ko00600	ko01100
isoform_10130	ko04016	ko04626
isoform_101300	ko04120
isoform_101301	ko00270	ko00480	ko01100
isoform_101306	ko00940	ko01100	ko01110
isoform_10131	ko04075
isoform_101325	ko00940	ko00941	ko00945	ko01100	ko01110
isoform_101330	ko00195	ko01100
isoform_101331	ko04120
isoform_101337	ko04145
isoform_101340	ko03410
isoform_101346	ko00195	ko01100
isoform_101352	ko04146
isoform_101354	ko03030	ko03420	ko03430	ko03440
isoform_101358	ko00910
isoform_101359	ko00053	ko00480
isoform_10136	ko00460	ko00500	ko00940	ko01100	ko01110
isoform_101361	ko03040
isoform_101368	ko00020	ko00630	ko01100	ko01110	ko01200	ko01210	ko01230
isoform_101372	ko00710	ko01100	ko01200
isoform_101373	ko03008
isoform_101378	ko00190	ko01100
isoform_101380	ko03010
isoform_101383	ko00350	ko00950	ko01100	ko01110
isoform_101385	ko00220	ko00330	ko01100	ko01110	ko01230
isoform_101396	ko04141	ko04145
isoform_101399	ko03010
isoform_101400	ko04144
isoform_101410	ko04146
isoform_101411	ko00940	ko01100	ko01110
isoform_101412	ko00195	ko01100
isoform_101413	ko03010
isoform_101414	ko00190	ko01100
isoform_101417	ko03018
isoform_10142	ko04016
isoform_101421	ko00941	ko01100	ko01110	ko04712
isoform_101429	ko00196	ko01100
isoform_10143	ko00564
isoform_101433	ko00400	ko01100	ko01110	ko01230
isoform_101435	ko04136
isoform_101437	ko00590	ko01100
isoform_101439	ko00010	ko00051	ko00562	ko00710	ko01100	ko01110	ko01200	ko01230
isoform_10144	ko00561	ko00564	ko01100
isoform_101448	ko00910
isoform_101449	ko04144
isoform_10145	ko04141
isoform_101451	ko03010
isoform_101455	ko00906	ko00908	ko01100	ko01110
isoform_101459	ko00190	ko01100
isoform_101460	ko00460	ko00500	ko00511	ko00940	ko01100	ko01110
isoform_101466	ko00520	ko00910	ko01100	ko04016
isoform_101475	ko04144
isoform_101477	ko03013
isoform_101479	ko01100	ko01110
isoform_10148	ko00520
isoform_101485	ko03010
isoform_101487	ko00520
isoform_10149	ko03018
isoform_101496	ko00190	ko01100
isoform_10150	ko00010	ko00230	ko00620	ko01100	ko01110	ko01200	ko01230
isoform_101501	ko03040
isoform_10151	ko00400	ko01100	ko01110	ko01230
isoform_101510	ko03010
isoform_101511	ko00905	ko01100	ko01110
isoform_101512	ko03020
isoform_101513	ko03010
isoform_101517	ko03013
isoform_101518	ko00630	ko00710	ko01100	ko01200
isoform_101526	ko04130
isoform_101530	ko00860	ko01100	ko01110
isoform_101533	ko03040
isoform_101538	ko00460	ko00500	ko00940	ko01100	ko01110
isoform_101539	ko03010
isoform_101543	ko03010
isoform_101548	ko03008
isoform_101549	ko00195	ko01100
isoform_101550	ko00290	ko00770	ko01100	ko01110	ko01210	ko01230
isoform_101554	ko00040	ko01100
isoform_101557	ko03020
isoform_101561	ko03020
isoform_101563	ko03010
isoform_101564	ko00196	ko01100
isoform_101565	ko03010
isoform_101566	ko00196
isoform_101569	ko00190	ko01100
isoform_10157	ko00052	ko00520	ko01100
isoform_101570	ko00130	ko01100	ko01110
isoform_101572	ko00195	ko01100
isoform_101573	ko04626
isoform_101575	ko00270	ko01100	ko01110	ko01230
isoform_10158	ko00562	ko01100	ko04070	ko04144
isoform_101582	ko03010
isoform_101583	ko00970
isoform_101587	ko00195	ko01100
isoform_101593	ko00190	ko01100
isoform_101603	ko03040
isoform_101605	ko03010
isoform_101606	ko00196	ko01100
isoform_101610	ko04146
isoform_101611	ko00190	ko01100
isoform_101613	ko00190	ko01100
isoform_101615	ko00940	ko01110
isoform_101619	ko00480	ko01100
isoform_101621	ko04120	ko04141
isoform_101622	ko03010
isoform_101634	ko00190	ko01100
isoform_101642	ko00910
isoform_101653	ko03010
isoform_101658	ko04146
isoform_101664	ko04120
isoform_101665	ko03040
isoform_101666	ko04141	ko04145
isoform_101667	ko00195
isoform_10167	ko00010	ko00030	ko00052	ko00230	ko00500	ko00520	ko01100	ko01110
isoform_101671	ko04144
isoform_101677	ko03020
isoform_101678	ko00071	ko00280	ko00592	ko01040	ko01100	ko01110	ko01212	ko04146
isoform_101679	ko00250	ko00410	ko00430	ko00650	ko01100	ko01110
isoform_101680	ko04144
isoform_101681	ko03050
isoform_101682	ko00240	ko01100
isoform_101687	ko03010
isoform_10169	ko00790	ko01100
isoform_101692	ko04146
isoform_101693	ko00062	ko01100	ko01110
isoform_1017	ko00514
isoform_10170	ko03018
isoform_101703	ko03060
isoform_101704	ko03010
isoform_101707	ko00360	ko00940	ko01100	ko01110
isoform_101708	ko00941	ko01100	ko01110
isoform_101710	ko03013
isoform_101716	ko03050
isoform_101717	ko00195
isoform_10172	ko00670	ko01100	ko01200
isoform_101725	ko03010
isoform_101730	ko00190	ko01100
isoform_101731	ko00592	ko01100	ko01110
isoform_101732	ko00190	ko01100
isoform_101734	ko03010
isoform_101738	ko04016	ko04070	ko04626
isoform_101743	ko00196	ko01100
isoform_101745	ko00196	ko01100
isoform_101746	ko03010
isoform_10175	ko00380	ko01100
isoform_101751	ko00061
isoform_101754	ko03060
isoform_101757	ko00940	ko01100	ko01110
isoform_101759	ko03010
isoform_10176	ko00860	ko01100	ko01110
isoform_101762	ko00520
isoform_101764	ko00562	ko01100	ko04070
isoform_101766	ko03018
isoform_101770	ko03040
isoform_101777	ko00062	ko01100	ko01110
isoform_101778	ko00360	ko00940	ko01100	ko01110
isoform_10178	ko00520
isoform_101780	ko00195	ko01100
isoform_101781	ko00195
isoform_101785	ko00010	ko00030	ko00051	ko00710	ko01100	ko01110	ko01200	ko01230
isoform_101786	ko00450
isoform_101794	ko04141	ko04145
isoform_101795	ko03040
isoform_101799	ko00196
isoform_1018	ko00500	ko01100
isoform_10180	ko04141
isoform_101801	ko00500	ko03020
isoform_101809	ko03010
isoform_101813	ko00220	ko00330	ko01100	ko01110	ko01230
isoform_101815	ko04141
isoform_101816	ko04141
isoform_10182	ko04075
isoform_101820	ko00196	ko01100
isoform_101828	ko00906	ko01100	ko01110
isoform_10183	ko00400	ko01100	ko01110	ko01230
isoform_101832	ko04146
isoform_101833	ko01100	ko01110
isoform_101834	ko00195	ko01100
isoform_10184	ko00061	ko00071	ko01100	ko01212	ko04146
isoform_101841	ko03010
isoform_101844	ko00190	ko01100
isoform_101845	ko03010
isoform_101849	ko03010
isoform_10185	ko00970	ko01100
isoform_101853	ko00562	ko01100
isoform_101855	ko00040	ko01100
isoform_101857	ko00196	ko01100
isoform_101863	ko04144
isoform_101867	ko03010
isoform_10187	ko03015
isoform_101870	ko00190	ko01100
isoform_101871	ko03060	ko04141	ko04145
isoform_101872	ko00620
isoform_101876	ko03010
isoform_101880	ko00230	ko01100	ko01110	ko03008
isoform_101885	ko00500	ko03020
isoform_101891	ko04145
isoform_101897	ko03010
isoform_101898	ko03010
isoform_101899	ko00270	ko01100
isoform_1019	ko00562	ko01100	ko04070
isoform_101900	ko04120
isoform_101905	ko00460	ko01110
isoform_101906	ko00040	ko00520	ko01100	ko04016
isoform_101907	ko03010
isoform_101917	ko00250	ko01100	ko01110	ko01230
isoform_101925	ko00196	ko01100
isoform_101926	ko03022
isoform_101927	ko00941	ko01100	ko01110
isoform_10193	ko03008
isoform_101936	ko03010
isoform_101938	ko03010
isoform_101941	ko00460	ko00500	ko00940	ko01100	ko01110
isoform_101942	ko03010
isoform_10195	ko00460	ko00500	ko00940	ko01100	ko01110
isoform_101953	ko00062	ko01040	ko01100	ko01110	ko01212
isoform_101954	ko03013
isoform_101960	ko04712
isoform_101962	ko04141
isoform_101965	ko03010
isoform_101966	ko03040
isoform_101968	ko03013
isoform_101971	ko00220	ko00250	ko00630	ko00910	ko01100	ko01230
isoform_10198	ko04016
isoform_101982	ko00480	ko00590
isoform_101985	ko00196	ko01100
isoform_10199	ko00910
isoform_101990	ko00040	ko01100
isoform_101994	ko04145
isoform_101996	ko03050	ko03440
isoform_101998	ko01100	ko01110
isoform_10200	ko00400	ko01100	ko01110	ko01230
isoform_102004	ko00195	ko01100
isoform_102007	ko03030	ko03410	ko03420	ko03430
isoform_102008	ko03040
isoform_102011	ko03060
isoform_102012	ko00970
isoform_102014	ko03010
isoform_102015	ko03010
isoform_102021	ko03010
isoform_102025	ko00020	ko00480	ko01100	ko01110	ko01200	ko01210	ko01230	ko04146
isoform_102026	ko00910
isoform_102034	ko00040	ko01100
isoform_102036	ko00350	ko00950	ko01100	ko01110
isoform_102037	ko00480
isoform_102044	ko04120
isoform_102049	ko00941	ko01110
isoform_102054	ko03010
isoform_102059	ko03040
isoform_10206	ko03440
isoform_102060	ko03040
isoform_102062	ko00860	ko01100	ko01110
isoform_102064	ko04016	ko04626
isoform_102069	ko00195	ko01100
isoform_10207	ko03008	ko04712
isoform_102073	ko03010
isoform_102074	ko03022
isoform_102076	ko00195
isoform_102077	ko03010
isoform_102084	ko03013
isoform_102087	ko03020
isoform_10209	ko00190	ko01100	ko04145
isoform_102090	ko03050
isoform_102091	ko04141
isoform_102093	ko00195	ko01100
isoform_102095	ko04141
isoform_102096	ko00260	ko01100
isoform_1021	ko00240	ko01100
isoform_102100	ko03008
isoform_102103	ko03010
isoform_102104	ko00940	ko01100	ko01110
isoform_102105	ko04141
isoform_102109	ko00940	ko01100	ko01110
isoform_102110	ko00130	ko01100	ko01110
isoform_102116	ko00190	ko01100
isoform_102118	ko00230	ko00240	ko01100	ko01110	ko04016
isoform_102120	ko00562	ko01100	ko04070	ko04144
isoform_102123	ko00010	ko00020	ko00620	ko00710	ko01100	ko01110	ko01200
isoform_102125	ko00195	ko01100
isoform_102126	ko03018	ko03040
isoform_10213	ko00860	ko01100	ko01110
isoform_102132	ko00195	ko01100
isoform_102134	ko00195
isoform_102136	ko03013	ko04120
isoform_102137	ko00195
isoform_102138	ko03018
isoform_10214	ko03040	ko04141	ko04144
isoform_102140	ko00940	ko01110	ko02010
isoform_102142	ko00940	ko01100	ko01110
isoform_102143	ko00564	ko01100	ko01110
isoform_102151	ko03010
isoform_102152	ko03010
isoform_102154	ko00250	ko00760	ko01100
isoform_102155	ko03010
isoform_102160	ko03040
isoform_102163	ko00860	ko01100	ko01110
isoform_102174	ko00195
isoform_102177	ko00270	ko01100
isoform_10218	ko00040	ko00052	ko00053	ko00520	ko01100	ko03018
isoform_102181	ko00360	ko00940	ko01100	ko01110
isoform_102182	ko00195	ko01100
isoform_102185	ko03010
isoform_102186	ko00260	ko00630	ko01100	ko01110	ko01200
isoform_102189	ko00460	ko00500	ko00940	ko01100	ko01110
isoform_10219	ko00970
isoform_102192	ko04120
isoform_102196	ko03010
isoform_102198	ko03010
isoform_102199	ko00190	ko01100
isoform_1022	ko00790
isoform_10220	ko04120
isoform_102203	ko03010
isoform_102206	ko00195	ko01100
isoform_102209	ko00910	ko03013	ko03015	ko03040	ko03420	ko04141
isoform_102210	ko03020
isoform_102211	ko00062	ko01100	ko01212
isoform_102212	ko03010
isoform_102213	ko03022
isoform_102220	ko00195
isoform_102224	ko03010
isoform_102226	ko00500	ko01100
isoform_102229	ko00960	ko01100	ko01110
isoform_102231	ko03010
isoform_102233	ko00190	ko01100
isoform_102238	ko03010
isoform_102239	ko00564	ko00565	ko01100	ko01110	ko04144
isoform_10224	ko00561	ko01100
isoform_102241	ko04141
isoform_102249	ko03013
isoform_102250	ko00520	ko00561
isoform_102251	ko03020
isoform_102258	ko00051	ko00520	ko01100	ko01110
isoform_10226	ko00514
isoform_102262	ko00190	ko01100
isoform_102265	ko00196	ko01100
isoform_102267	ko03010
isoform_102270	ko00190	ko01100
isoform_102271	ko03020
isoform_102273	ko00190	ko01100	ko04145
isoform_102275	ko00196	ko01100
isoform_102279	ko00040	ko00053	ko00520	ko01100	ko04075
isoform_102280	ko03010
isoform_10229	ko00500	ko01100
isoform_102290	ko00400	ko01100	ko01110	ko01230
isoform_102301	ko03018
isoform_102304	ko03040
isoform_102305	ko00196	ko01100
isoform_102307	ko04120	ko04141
isoform_10231	ko00562	ko01100	ko04070
isoform_102313	ko00460	ko00500	ko00940	ko01100	ko01110
isoform_102315	ko04141	ko04626
isoform_102322	ko00564
isoform_102325	ko00190	ko01100
isoform_102333	ko03013
isoform_102335	ko04120
isoform_102339	ko00030	ko01100	ko01110	ko01200	ko01230
isoform_102340	ko00940	ko01100	ko01110	ko03010
isoform_102343	ko00190	ko01100
isoform_102348	ko03060
isoform_102352	ko03010
isoform_102355	ko00195	ko01100
isoform_102356	ko00941	ko01100	ko01110
isoform_10236	ko00130	ko00360	ko00940	ko01100	ko01110
isoform_102364	ko00260	ko00400	ko01100	ko01110	ko01230
isoform_102365	ko04016	ko04075
isoform_102366	ko00920	ko01100
isoform_102367	ko03020
isoform_102368	ko00196	ko01100
isoform_102369	ko00010	ko00230	ko00620	ko01100	ko01110	ko01200	ko01230
isoform_102371	ko03010
isoform_102373	ko03008	ko03013	ko03015	ko03040
isoform_102375	ko00040	ko00053	ko00860	ko00942	ko01100	ko01110
isoform_102376	ko03022
isoform_10238	ko00190	ko01100
isoform_102381	ko03010
isoform_102384	ko04120
isoform_102387	ko00710	ko01100	ko01200
isoform_102388	ko00910
isoform_102389	ko03013
isoform_10239	ko04075
isoform_102391	ko03010
isoform_102393	ko00130	ko01100	ko01110
isoform_102399	ko04626
isoform_1024	ko03008
isoform_102402	ko00480	ko01100
isoform_102410	ko03010
isoform_102417	ko00220	ko00250	ko00630	ko00910	ko01100	ko01230
isoform_102419	ko04120	ko04141
isoform_102422	ko00240	ko01100
isoform_102423	ko00630	ko00710	ko01100	ko01200
isoform_102426	ko00350	ko00950	ko01100	ko01110
isoform_102429	ko03010
isoform_102431	ko03010
isoform_102434	ko00010	ko00020	ko00620	ko01100	ko01110	ko01200
isoform_102435	ko00195
isoform_102441	ko00190	ko01100
isoform_102443	ko03010
isoform_102444	ko00270	ko01100
isoform_102445	ko03013
isoform_102446	ko03010
isoform_102449	ko00620
isoform_10245	ko00130	ko00360	ko00940	ko01100	ko01110
isoform_102454	ko03010
isoform_102455	ko04146
isoform_102456	ko00061	ko00780	ko01100	ko01212
isoform_102459	ko00053	ko00480
isoform_10246	ko04141
isoform_102465	ko03010
isoform_10247	ko03030	ko03420	ko03430
isoform_102475	ko03010
isoform_102476	ko03010
isoform_102477	ko00520	ko01100	ko03020	ko04016
isoform_10248	ko04016	ko04626
isoform_102480	ko03018	ko03040
isoform_102481	ko00196	ko01100
isoform_102484	ko04141
isoform_102485	ko00906	ko01110
isoform_102489	ko03010
isoform_10249	ko00520
isoform_102495	ko00073
isoform_102498	ko03040
isoform_10250	ko00563	ko01100
isoform_102504	ko00190	ko01100
isoform_102506	ko00260	ko00290	ko01100	ko01110	ko01200	ko01230
isoform_102512	ko00270	ko01100
isoform_102513	ko00040	ko00053	ko00860	ko00908	ko01100	ko01110
isoform_102518	ko00940	ko01100	ko01110
isoform_102519	ko03020
isoform_102528	ko00500	ko01100	ko01110
isoform_102529	ko03010
isoform_102530	ko00010	ko00053	ko00071	ko00280	ko00310	ko00330	ko00340	ko00380	ko00410	ko00561	ko00620	ko00903	ko01100	ko01110
isoform_102531	ko03010
isoform_102534	ko03010
isoform_102538	ko00195	ko01100
isoform_102540	ko03010
isoform_102542	ko00270	ko00920	ko01100	ko01110	ko01200	ko01230
isoform_102545	ko00630	ko00710	ko01100	ko01200
isoform_102546	ko03015
isoform_102550	ko03010
isoform_102551	ko00190	ko01100
isoform_102556	ko00904	ko01100	ko01110
isoform_102557	ko00400	ko01100	ko01110	ko01230	ko03010
isoform_102558	ko03050	ko03440
isoform_10256	ko00195	ko01100
isoform_102560	ko00190	ko01100
isoform_102562	ko00190	ko01100
isoform_102563	ko00196	ko01100
isoform_102567	ko03010
isoform_102580	ko03050
isoform_102581	ko03010
isoform_102582	ko03020
isoform_102584	ko04146
isoform_102588	ko00561	ko00564	ko01100	ko01110
isoform_102589	ko04141
isoform_10259	ko03040	ko04016	ko04626
isoform_102590	ko03020
isoform_102593	ko00270	ko00280	ko00290	ko00770	ko01100	ko01110	ko01210	ko01230
isoform_102596	ko00190	ko01100
isoform_1026	ko04016	ko04075
isoform_10260	ko03040
isoform_102600	ko03013
isoform_102608	ko00040
isoform_102612	ko03040
isoform_102614	ko00910
isoform_102618	ko00220	ko00250	ko00630	ko00910	ko01100	ko01230
isoform_102627	ko00510	ko01100	ko04141
isoform_102632	ko04120
isoform_102633	ko00195	ko01100
isoform_102634	ko03010
isoform_102636	ko03013
isoform_102637	ko03010
isoform_102645	ko03040
isoform_102646	ko03018
isoform_102647	ko03010
isoform_102649	ko00195	ko01100
isoform_10265	ko03015
isoform_102656	ko00195
isoform_102662	ko03010
isoform_102663	ko03013
isoform_102664	ko03410
isoform_102665	ko00350	ko00360
isoform_102666	ko03008	ko03013
isoform_102668	ko00520	ko01100	ko04016
isoform_102669	ko00020	ko00480	ko01100	ko01110	ko01200	ko01210	ko01230	ko04146
isoform_10267	ko04141	ko04626
isoform_102678	ko00130	ko00260	ko00350	ko00360	ko00630	ko00960	ko01100	ko01110	ko01200
isoform_102679	ko03020
isoform_102682	ko00010	ko00071	ko00350	ko01100	ko01110
isoform_102685	ko03010
isoform_102687	ko04712
isoform_102688	ko04016	ko04070	ko04626
isoform_10269	ko03018
isoform_102691	ko03010
isoform_102692	ko03010
isoform_102694	ko03050
isoform_102697	ko03040
isoform_1027	ko00020	ko00310	ko00380	ko01100	ko01110	ko01200
isoform_102700	ko00196	ko01100
isoform_102704	ko03420	ko04120
isoform_102706	ko04122
isoform_102707	ko00592	ko01100	ko01110
isoform_102709	ko00860	ko01100	ko01110
isoform_10271	ko04075
isoform_102714	ko00500
isoform_102718	ko03010
isoform_102720	ko00514
isoform_102724	ko04075
isoform_10273	ko04626
isoform_102731	ko03008
isoform_102733	ko00020	ko01100	ko01110	ko01200	ko01210	ko01230
isoform_10274	ko00400	ko01100	ko01110	ko01230
isoform_102741	ko03022
isoform_102743	ko04120	ko04141
isoform_102748	ko04120
isoform_102750	ko00010	ko00053	ko00071	ko00280	ko00310	ko00330	ko00340	ko00380	ko00410	ko00561	ko00620	ko00903	ko00940	ko01100	ko01110
isoform_102756	ko00020	ko01100	ko01110
isoform_102759	ko00350	ko01100
isoform_102761	ko03060
isoform_102770	ko03010
isoform_102772	ko03020
isoform_102773	ko03010
isoform_102779	ko03010
isoform_102781	ko00310
isoform_102784	ko00940	ko00941	ko00945	ko01100	ko01110
isoform_102788	ko04626
isoform_102789	ko00053	ko00480
isoform_102790	ko00195	ko01100
isoform_102799	ko04141
isoform_1028	ko03440
isoform_102806	ko03050	ko03440
isoform_102807	ko03020
isoform_102808	ko03013
isoform_102809	ko03018	ko03040
isoform_10281	ko03060	ko04141	ko04145
isoform_102817	ko00860	ko01100	ko01110
isoform_10282	ko04016	ko04626
isoform_102820	ko00260	ko00400	ko01100	ko01110	ko01230
isoform_102823	ko00040	ko00052	ko00053	ko00520	ko00760	ko01100	ko04144
isoform_10283	ko00906	ko01100	ko01110
isoform_102831	ko04141
isoform_102832	ko03010
isoform_102835	ko00190	ko01100
isoform_102836	ko03010
isoform_102838	ko00220	ko00250	ko00630	ko00910	ko01100	ko01230
isoform_102841	ko03010
isoform_102844	ko03010
isoform_102845	ko04144
isoform_102847	ko00196	ko01100
isoform_102848	ko00190	ko01100
isoform_102849	ko03010
isoform_10285	ko00071	ko00592	ko01040	ko01100	ko01110	ko01212	ko04146
isoform_102854	ko00562	ko01100	ko04070	ko04144
isoform_102866	ko00010	ko00053	ko00071	ko00280	ko00310	ko00330	ko00340	ko00380	ko00410	ko00561	ko00620	ko00903	ko01100	ko01110
isoform_102869	ko03013
isoform_10287	ko00052	ko00500	ko01100
isoform_102870	ko03010
isoform_102871	ko03040	ko04141	ko04144
isoform_102872	ko00564	ko01100
isoform_102873	ko03050
isoform_102875	ko00010	ko00030	ko00051	ko00710	ko01100	ko01110	ko01200	ko01230
isoform_102878	ko03020
isoform_102881	ko00040	ko01100
isoform_102883	ko04145
isoform_102884	ko00190	ko01100
isoform_102890	ko04130
isoform_102891	ko03010
isoform_102898	ko00020	ko01100	ko01110	ko01200	ko01210	ko01230
isoform_102899	ko00941	ko01100	ko01110	ko04712
isoform_10290	ko00500	ko01100	ko01110
isoform_102901	ko03010
isoform_102905	ko00062	ko01100	ko01110
isoform_102909	ko00195
isoform_102913	ko03010
isoform_102917	ko03040
isoform_10292	ko00020	ko00630	ko01100	ko01110	ko01200	ko01210	ko01230
isoform_102920	ko03010
isoform_102923	ko00062	ko01100	ko01212
isoform_102924	ko03013	ko03015	ko03018	ko03040
isoform_102929	ko00940	ko01100	ko01110
isoform_10293	ko00500	ko00520	ko01100	ko01110
isoform_102933	ko03010
isoform_102934	ko00500
isoform_102940	ko03010
isoform_102941	ko00510	ko00563	ko01100
isoform_102943	ko00195	ko01100
isoform_102955	ko00196	ko01100
isoform_102956	ko03015
isoform_102963	ko00350	ko00360
isoform_102969	ko00910
isoform_102971	ko03018
isoform_102974	ko03010
isoform_102976	ko00195	ko01100
isoform_102986	ko00563	ko01100
isoform_102989	ko03010
isoform_103	ko00500	ko01100
isoform_1030	ko04141
isoform_103000	ko00860	ko00900	ko01100	ko01110
isoform_103004	ko03010
isoform_103006	ko00196	ko01100
isoform_103008	ko03018
isoform_103012	ko00190	ko01100
isoform_103016	ko03050
isoform_103021	ko04141
isoform_103023	ko04141
isoform_103030	ko00350	ko00360
isoform_103039	ko03010
isoform_103042	ko03010
isoform_103043	ko00190	ko01100
isoform_103047	ko00195	ko01100
isoform_10305	ko00010	ko01100	ko01110
isoform_103055	ko03013
isoform_103057	ko00480
isoform_103058	ko00196
isoform_103059	ko04144	ko04145
isoform_10306	ko00562	ko01100	ko04070
isoform_103060	ko03040
isoform_103065	ko03010
isoform_103068	ko00250	ko00410	ko00430	ko00650	ko01100	ko01110
isoform_10307	ko00970
isoform_103072	ko00790	ko01100	ko04122
isoform_103079	ko03010
isoform_103080	ko03050
isoform_103087	ko00910
isoform_103089	ko03010
isoform_103091	ko00520	ko01100	ko04016
isoform_103098	ko00910
isoform_1031	ko03040
isoform_103101	ko03040
isoform_103107	ko03010
isoform_103108	ko00510	ko01100	ko04141
isoform_103114	ko03040
isoform_103115	ko03010
isoform_103123	ko03013	ko03015	ko03040
isoform_103128	ko03020
isoform_103129	ko03010
isoform_10313	ko04075
isoform_103133	ko00190	ko01100
isoform_103138	ko00196	ko01100
isoform_103142	ko03040	ko04712
isoform_103148	ko01100
isoform_103149	ko00190	ko01100
isoform_103152	ko00195
isoform_103153	ko00040	ko00053	ko00520	ko01100
isoform_103156	ko00562	ko01100	ko04070	ko04144
isoform_103162	ko00860	ko01100	ko01110
isoform_103164	ko00190	ko01100
isoform_103165	ko00040	ko01100
isoform_103170	ko00010	ko01100	ko01110	ko01200	ko01230	ko03018
isoform_103171	ko04016	ko04075
isoform_103172	ko03013
isoform_103175	ko03013
isoform_103177	ko04075
isoform_103182	ko00196	ko01100
isoform_103185	ko00196	ko01100
isoform_103186	ko03010
isoform_103192	ko00270	ko01100	ko01110	ko01230
isoform_103193	ko00511
isoform_103196	ko00630	ko00910
isoform_103199	ko00910
isoform_103201	ko00195	ko01100
isoform_103205	ko03008
isoform_10321	ko00562	ko01100	ko04070
isoform_10322	ko00860	ko01100	ko01110
isoform_103220	ko03010
isoform_103227	ko03010
isoform_103229	ko00906	ko01110
isoform_10323	ko00750	ko01100
isoform_103232	ko00196
isoform_103234	ko04144
isoform_103236	ko03010
isoform_10324	ko04016	ko04141
isoform_103241	ko03013
isoform_103242	ko00510	ko01100	ko04141
isoform_103244	ko03010
isoform_103249	ko03010
isoform_10325	ko03040
isoform_103250	ko03018
isoform_103253	ko00520	ko01100	ko04016
isoform_103255	ko03040
isoform_103266	ko01040	ko01212
isoform_103269	ko03010
isoform_10327	ko03060	ko04141
isoform_103272	ko03010
isoform_103274	ko00071	ko00073	ko01100
isoform_103279	ko03040
isoform_103283	ko04016	ko04070	ko04626
isoform_103289	ko00940	ko00941	ko00945	ko01100	ko01110
isoform_103291	ko03010
isoform_103292	ko04120
isoform_103293	ko03018	ko03040
isoform_103296	ko03010
isoform_103297	ko00195
isoform_103299	ko00040	ko01100	ko03020
isoform_103302	ko04016	ko04075
isoform_103303	ko03013	ko03015	ko03040
isoform_103306	ko03050
isoform_103307	ko00520	ko01100	ko04016
isoform_103318	ko03010
isoform_10332	ko00520
isoform_103320	ko03010
isoform_103321	ko03010
isoform_103322	ko04141
isoform_103324	ko00941	ko01100	ko01110	ko04712
isoform_103329	ko00220	ko00250	ko00270	ko00330	ko00350	ko00360	ko00400	ko00710	ko00950	ko00960	ko01100	ko01110	ko01200	ko01210	ko01230
isoform_10333	ko04120
isoform_103333	ko00195
isoform_103335	ko00500	ko01100	ko01110
isoform_103336	ko00196	ko01100
isoform_103337	ko00900	ko01100	ko01110
isoform_103339	ko00195	ko01100
isoform_103340	ko04712
isoform_103344	ko00940	ko01100	ko01110
isoform_103355	ko03018
isoform_10336	ko00564	ko00592	ko01100	ko01110
isoform_103360	ko00190	ko00195	ko01100
isoform_103363	ko00195	ko01100
isoform_103369	ko00941	ko01100	ko01110
isoform_103378	ko03010
isoform_10338	ko00790	ko01100
isoform_103385	ko03010
isoform_103389	ko00340	ko01100	ko01110	ko01230
isoform_103390	ko00520	ko01100
isoform_103391	ko03010
isoform_103396	ko00562	ko01100	ko04070
isoform_103401	ko03040
isoform_103404	ko03040
isoform_103408	ko00010	ko00020	ko00620	ko01100	ko01110	ko01200
isoform_103409	ko03020
isoform_10341	ko03040
isoform_103414	ko00010	ko00051	ko00562	ko00710	ko01100	ko01110	ko01200	ko01230
isoform_103418	ko00600	ko01100
isoform_103421	ko03010
isoform_103427	ko04712
isoform_103435	ko00860	ko01100	ko01110
isoform_103436	ko00590	ko01100	ko04120	ko04146
isoform_103439	ko00196	ko01100
isoform_103447	ko00910
isoform_103449	ko00350	ko00950	ko01100	ko01110
isoform_10345	ko04075
isoform_103453	ko00195	ko01100
isoform_10346	ko00010	ko00620	ko00630	ko00640	ko01100	ko01110	ko01200
isoform_103462	ko04141
isoform_103463	ko00770	ko01100
isoform_103464	ko03040
isoform_10347	ko03013
isoform_103473	ko00010	ko01100	ko01110	ko01200	ko01230	ko03018
isoform_103475	ko00195
isoform_103477	ko03010
isoform_10348	ko03015
isoform_103488	ko03040
isoform_103489	ko04120
isoform_103493	ko03018
isoform_103495	ko00040	ko01100
isoform_103496	ko03008
isoform_1035	ko00500	ko01100
isoform_103503	ko00061	ko00620	ko00640	ko01100	ko01110	ko01200	ko01212
isoform_103504	ko00500
isoform_103505	ko03010
isoform_103506	ko00480
isoform_103507	ko03040
isoform_103509	ko04146
isoform_10351	ko00500	ko01100	ko01110
isoform_103515	ko04120
isoform_103516	ko03013
isoform_103517	ko00520
isoform_103519	ko03040
isoform_103520	ko04146
isoform_103522	ko04075
isoform_103527	ko03020
isoform_10353	ko04016
isoform_103535	ko04075	ko04712
isoform_103536	ko00941	ko01100	ko01110	ko04712
isoform_103537	ko00590	ko01100
isoform_103539	ko00190	ko01100
isoform_103546	ko03013	ko03015	ko03040
isoform_103552	ko04141
isoform_103554	ko00051	ko00500	ko00520	ko01100
isoform_103555	ko03010
isoform_103556	ko00790	ko01100
isoform_103558	ko03013	ko03015
isoform_103564	ko00450
isoform_10357	ko04075
isoform_103573	ko03040
isoform_103576	ko03013
isoform_103577	ko03010
isoform_103579	ko00195	ko01100
isoform_103580	ko00940	ko01100	ko01110
isoform_103582	ko04120	ko04141
isoform_103583	ko00030	ko01100	ko01110	ko01200	ko01230
isoform_103589	ko00563	ko01100
isoform_103590	ko00195	ko01100
isoform_103591	ko00905
isoform_103595	ko00195	ko01100
isoform_103599	ko03050	ko03440
isoform_1036	ko04120
isoform_103600	ko00740	ko01100	ko01110
isoform_103602	ko03040
isoform_103603	ko03008
isoform_103605	ko03010
isoform_10361	ko00071	ko00592	ko01040	ko01100	ko01110	ko01212	ko04136	ko04146
isoform_103618	ko00010	ko01100	ko01110	ko01200	ko01230	ko03018
isoform_103619	ko00195
isoform_10362	ko00500
isoform_103620	ko00562	ko01100
isoform_103625	ko00941	ko01100	ko01110	ko04712
isoform_103627	ko00190	ko01100
isoform_103632	ko03010
isoform_103633	ko00591
isoform_103642	ko00511	ko03015	ko03040
isoform_103644	ko00970	ko01100
isoform_103645	ko00220	ko01100	ko01110	ko01210	ko01230
isoform_10365	ko03013
isoform_103652	ko03022
isoform_103659	ko00230	ko00740	ko01100
isoform_10366	ko00790	ko01100
isoform_103662	ko00195	ko01100
isoform_103663	ko04146
isoform_10367	ko00040	ko01100
isoform_103670	ko03010
isoform_103673	ko04626
isoform_103676	ko00860	ko01100	ko01110
isoform_103677	ko04141
isoform_10368	ko00310
isoform_103681	ko03010
isoform_103682	ko03010
isoform_103684	ko04075
isoform_103694	ko04626
isoform_1037	ko03020	ko04144
isoform_10370	ko00740	ko01100	ko01110
isoform_103702	ko03008
isoform_103706	ko04141
isoform_103708	ko00900	ko01100	ko01110
isoform_10371	ko04626
isoform_103715	ko03020
isoform_103718	ko00250	ko00410	ko00430	ko00650	ko01100	ko01110
isoform_10372	ko03022
isoform_103720	ko00030	ko00480	ko01100	ko01110	ko01200
isoform_103721	ko00230	ko00740	ko01100
isoform_103723	ko04141	ko04626
isoform_103727	ko00196	ko01100
isoform_103730	ko03010
isoform_103733	ko00520	ko01100	ko03022	ko03420
isoform_103735	ko03010
isoform_103736	ko00270	ko00920	ko01100	ko01110	ko01200	ko01230
isoform_103743	ko04141
isoform_103744	ko00190	ko01100
isoform_103746	ko00010	ko01100	ko01110
isoform_103754	ko00260	ko01100
isoform_103758	ko00510	ko01100	ko04141
isoform_103760	ko03040
isoform_103765	ko00220	ko00250	ko00630	ko00910	ko01100	ko01230
isoform_103767	ko00562	ko01100
isoform_103775	ko00940	ko01100	ko01110
isoform_103779	ko04075
isoform_10378	ko00310
isoform_103783	ko00053	ko01100
isoform_10379	ko00860	ko01100	ko01110
isoform_103790	ko04120
isoform_103793	ko02010
isoform_103797	ko00220	ko00250	ko00630	ko00910	ko01100	ko01230
isoform_103798	ko00190	ko01100
isoform_1038	ko04016	ko04626
isoform_103802	ko00040	ko01100
isoform_103807	ko03022
isoform_103810	ko03010
isoform_103812	ko00220	ko00330	ko01100	ko01110	ko01230
isoform_103816	ko04144
isoform_103825	ko03010
isoform_103828	ko00196	ko01100
isoform_103829	ko04146
isoform_10383	ko03018
isoform_103832	ko03010
isoform_103833	ko03060
isoform_103834	ko03420	ko04120	ko04141
isoform_103835	ko03010
isoform_103836	ko00590	ko01100
isoform_103838	ko03010
isoform_10384	ko00130	ko00360	ko00940	ko01100	ko01110
isoform_103843	ko04141
isoform_103850	ko00061	ko00620	ko00640	ko01100	ko01110	ko01200	ko01212
isoform_103852	ko04146
isoform_103856	ko04120	ko04141
isoform_103858	ko00562	ko01100	ko04070
isoform_10386	ko00053	ko00480	ko01100
isoform_103865	ko00480
isoform_103869	ko03010
isoform_103872	ko03010
isoform_103877	ko04136
isoform_103878	ko00196	ko01100
isoform_10388	ko00010	ko01100	ko01110
isoform_103884	ko00196	ko01100
isoform_103886	ko04141
isoform_103894	ko04130
isoform_103895	ko03008
isoform_103899	ko03010
isoform_10390	ko00970	ko01100
isoform_103900	ko03010
isoform_103901	ko00942	ko01100	ko01110
isoform_103907	ko00290	ko00650	ko00660	ko00770	ko01100	ko01110	ko01210	ko01230
isoform_103910	ko00940	ko00944	ko01100	ko01110
isoform_103921	ko00196	ko01100
isoform_103925	ko00905
isoform_103929	ko03010
isoform_10393	ko00061	ko00780	ko01100	ko01212
isoform_103932	ko03010
isoform_103933	ko03010
isoform_103934	ko03010
isoform_103937	ko04146
isoform_103941	ko04141
isoform_103942	ko03040
isoform_103947	ko00196	ko01100
isoform_103948	ko04141
isoform_103959	ko04120
isoform_10396	ko04712
isoform_103961	ko00500	ko01100	ko01110
isoform_103965	ko03010
isoform_103967	ko03010
isoform_10397	ko00500	ko01100
isoform_103970	ko00330
isoform_103971	ko03010
isoform_103974	ko00190	ko01100
isoform_10398	ko03040	ko04141	ko04144
isoform_103980	ko00230	ko00240	ko01100	ko01110	ko04016
isoform_103983	ko00100
isoform_103984	ko00910
isoform_103989	ko03010
isoform_103990	ko03040
isoform_103991	ko00500	ko01100	ko01110
isoform_103994	ko00195
isoform_103995	ko03040
isoform_103996	ko00260	ko00460	ko00630	ko00670	ko01100	ko01110	ko01200	ko01230
isoform_1040	ko00620	ko00710	ko01100	ko01200
isoform_10400	ko00561	ko00564	ko01100	ko01110	ko04070
isoform_104008	ko00280	ko01100
isoform_104012	ko00040
isoform_104016	ko04141
isoform_104018	ko00020	ko01100	ko01110	ko01200	ko01210	ko01230
isoform_104019	ko03015
isoform_104020	ko03010
isoform_104025	ko00261	ko00300	ko01100	ko01110	ko01230
isoform_104026	ko00240	ko01100
isoform_10403	ko03015
isoform_104032	ko03010
isoform_104037	ko03013
isoform_104038	ko04712
isoform_104042	ko00190	ko00195	ko01100
isoform_10405	ko03008
isoform_104050	ko04075
isoform_10406	ko00970
isoform_104060	ko03040
isoform_104066	ko03020
isoform_104072	ko00195	ko01100
isoform_104073	ko03040
isoform_104074	ko03040
isoform_104077	ko00860	ko01100	ko01110
isoform_10408	ko04075
isoform_104083	ko04141
isoform_104084	ko00195	ko01100
isoform_104087	ko00910
isoform_104091	ko00195	ko01100
isoform_104092	ko00710	ko01100	ko01200
isoform_104094	ko00500	ko00520	ko01100	ko01110
isoform_104097	ko04016
isoform_104099	ko00960	ko01100	ko01110
isoform_104103	ko00270	ko00450	ko01100	ko01110	ko01230
isoform_104105	ko00561	ko01100	ko04626
isoform_104107	ko00500
isoform_104110	ko00670	ko00970
isoform_104115	ko04130
isoform_104116	ko03040
isoform_104119	ko03010
isoform_10412	ko00020	ko00190	ko01100	ko01110	ko01200
isoform_104120	ko03020
isoform_104121	ko00910
isoform_104122	ko04120
isoform_104124	ko04146
isoform_104126	ko00195
isoform_104127	ko03008	ko03013
isoform_104128	ko00196	ko01100
isoform_104129	ko00290	ko00650	ko00660	ko00770	ko01100	ko01110	ko01210	ko01230
isoform_10413	ko00500	ko01100
isoform_104132	ko03013	ko03015	ko03022	ko03040
isoform_104133	ko00195	ko01100
isoform_10414	ko00230	ko03040
isoform_104140	ko03010
isoform_104141	ko00941	ko01100	ko01110	ko04712
isoform_104143	ko00130	ko00350	ko00360	ko00960	ko01110
isoform_104146	ko00195	ko01100
isoform_104147	ko03010
isoform_10415	ko03013
isoform_104150	ko00230	ko01100	ko01110	ko03008
isoform_104155	ko00270	ko00480	ko01100
isoform_104158	ko00480
isoform_104159	ko00190	ko01100
isoform_104161	ko04120	ko04141
isoform_104162	ko00196
isoform_104164	ko04141	ko04145
isoform_104165	ko00480
isoform_104169	ko00010	ko01100	ko01110
isoform_104174	ko00040	ko01100
isoform_104175	ko04120	ko04144
isoform_104177	ko00260	ko00400	ko01100	ko01110	ko01230
isoform_104181	ko04146
isoform_104186	ko00196	ko01100
isoform_104188	ko00190	ko01100
isoform_10419	ko00500	ko01100
isoform_104190	ko00195	ko01100
isoform_104195	ko03010
isoform_104199	ko01100	ko01110
isoform_10420	ko00062	ko01100	ko01110
isoform_104203	ko03022
isoform_104207	ko03010
isoform_104210	ko03010
isoform_104213	ko04016	ko04075
isoform_104226	ko00195	ko01100
isoform_104227	ko00230	ko00240	ko00500	ko00740	ko00760	ko00770	ko01100
isoform_104228	ko03060
isoform_104229	ko00190	ko01100
isoform_104231	ko03040
isoform_104232	ko03060	ko04141	ko04145
isoform_104236	ko00130	ko00350	ko00360	ko01100
isoform_104237	ko00480
isoform_104239	ko04145
isoform_104242	ko00592	ko01110
isoform_104243	ko00195	ko01100
isoform_104244	ko03010
isoform_104246	ko00195	ko01100
isoform_104249	ko00480
isoform_104251	ko03013
isoform_104253	ko03010
isoform_104259	ko00900	ko01100	ko01110	ko04146
isoform_104264	ko03040
isoform_104267	ko00190	ko01100
isoform_104271	ko03015	ko04136
isoform_104273	ko00350	ko00360
isoform_104279	ko00196	ko01100
isoform_10428	ko03015
isoform_104280	ko00270	ko00480	ko01100
isoform_104283	ko00196	ko01100
isoform_104287	ko03022	ko03420
isoform_104291	ko00520
isoform_104292	ko00220	ko01100	ko01110	ko01210	ko01230
isoform_104295	ko04144
isoform_104298	ko04141
isoform_1043	ko00500	ko01100	ko01110
isoform_104300	ko03013
isoform_104302	ko00520
isoform_104308	ko03018
isoform_104313	ko04120
isoform_104314	ko00195	ko01100
isoform_10432	ko00480
isoform_104321	ko00190	ko01100
isoform_104326	ko00460	ko00500	ko00940	ko01100	ko01110
isoform_10433	ko00040	ko01100
isoform_104334	ko04016	ko04075	ko04626
isoform_104337	ko00340	ko01100	ko01110
isoform_104338	ko03040
isoform_104343	ko00350	ko00950	ko01100	ko01110
isoform_104346	ko00562	ko01100
isoform_104349	ko00190	ko01100
isoform_10435	ko00073
isoform_104350	ko03040	ko04141	ko04144
isoform_104352	ko00190	ko01100
isoform_104353	ko03010
isoform_104355	ko03010
isoform_104356	ko03013
isoform_104357	ko00592	ko01100	ko01110
isoform_104358	ko03013
isoform_10436	ko00860	ko01100	ko01110
isoform_104364	ko03010
isoform_10437	ko00073	ko01110
isoform_104370	ko04146
isoform_104371	ko00760	ko01100
isoform_104372	ko04120
isoform_104386	ko00190	ko01100
isoform_104389	ko03050
isoform_10439	ko04144
isoform_104390	ko04141
isoform_104391	ko03010
isoform_104396	ko00270	ko01100	ko01110	ko01230
isoform_1044	ko00500	ko01100
isoform_10440	ko00260	ko00460	ko00630	ko00670	ko01100	ko01110	ko01200	ko01230
isoform_104402	ko04016	ko04075	ko04626
isoform_104413	ko03018	ko03040
isoform_104417	ko03060
isoform_104422	ko03013
isoform_104423	ko00040	ko01100
isoform_104427	ko00906	ko01100	ko01110
isoform_104428	ko03018	ko03040
isoform_10443	ko04144
isoform_104433	ko04141	ko04626
isoform_104435	ko00250	ko00410	ko00430	ko00650	ko01100	ko01110
isoform_104436	ko00910
isoform_104438	ko00330	ko01100
isoform_104440	ko03013
isoform_104442	ko04141
isoform_104448	ko00400	ko01100	ko01110	ko01230
isoform_10445	ko03040
isoform_104450	ko03050
isoform_104451	ko00460	ko00500	ko00940	ko01100	ko01110
isoform_104454	ko03010
isoform_104459	ko00195
isoform_104460	ko00740	ko01100
isoform_104466	ko03013
isoform_104475	ko03010
isoform_104478	ko00020	ko01100	ko01110	ko01200	ko01210	ko01230
isoform_104479	ko04626
isoform_10448	ko04712
isoform_104481	ko03040
isoform_104483	ko03010
isoform_104484	ko03060
isoform_10449	ko04141	ko04626
isoform_104490	ko03010
isoform_104492	ko03008	ko03040
isoform_104496	ko00190	ko01100
isoform_1045	ko00770	ko01100
isoform_104505	ko00220	ko01100	ko01110	ko01210	ko01230
isoform_104518	ko00900	ko01110
isoform_10452	ko00460
isoform_104520	ko03018	ko03040
isoform_104523	ko00905
isoform_104525	ko04075
isoform_104526	ko00130	ko00360	ko00940	ko00941	ko00945	ko01100	ko01110
isoform_104527	ko00920	ko01100
isoform_104529	ko00510	ko01100	ko04141
isoform_10453	ko00230	ko01100	ko01110
isoform_104542	ko03040
isoform_104554	ko00970
isoform_104555	ko00240	ko00760
isoform_104559	ko00196	ko01100
isoform_10456	ko00500
isoform_104561	ko02010
isoform_104563	ko00360	ko00940	ko01100	ko01110
isoform_104564	ko03010
isoform_104566	ko04144
isoform_10457	ko00073	ko01110
isoform_104571	ko03018
isoform_104572	ko00195	ko01100
isoform_104574	ko03040
isoform_104577	ko04120	ko04141
isoform_104578	ko00195	ko01100
isoform_104582	ko00040	ko00053	ko00860	ko00908	ko01100	ko01110
isoform_104593	ko03008	ko03013
isoform_104595	ko03013	ko03015	ko03040
isoform_104596	ko00630	ko00710	ko01100	ko01200
isoform_104598	ko00232	ko00380	ko00591	ko01100	ko01110
isoform_1046	ko00500	ko01100
isoform_104603	ko04141
isoform_104606	ko03010
isoform_104608	ko04016	ko04070	ko04626
isoform_104610	ko03060
isoform_104611	ko03040
isoform_104620	ko03010
isoform_104621	ko00500	ko00520	ko01100	ko01110
isoform_104624	ko04145
isoform_104627	ko03008
isoform_104629	ko00940	ko01100	ko01110
isoform_10463	ko00030	ko00230	ko01100	ko01110	ko01200	ko01230
isoform_104631	ko00520
isoform_104633	ko00592	ko01100	ko01110
isoform_104634	ko03010
isoform_104635	ko04120
isoform_104637	ko03010
isoform_104639	ko00920	ko01100
isoform_104640	ko00196	ko01100
isoform_104642	ko00906	ko00908	ko01100	ko01110
isoform_104644	ko00190	ko01100
isoform_104645	ko00195	ko01100
isoform_104649	ko00195	ko01100
isoform_104652	ko03010
isoform_104656	ko00010	ko00230	ko00620	ko01100	ko01110	ko01200	ko01230
isoform_104660	ko04146
isoform_104661	ko00010	ko00710	ko01100	ko01110	ko01200	ko01230
isoform_104662	ko00010	ko00030	ko01100	ko01200
isoform_104666	ko04141
isoform_104667	ko04130
isoform_104674	ko00591
isoform_104678	ko03010
isoform_104680	ko00310
isoform_104682	ko00340	ko01100	ko01110
isoform_104689	ko00062	ko01040	ko01100	ko01110	ko01212
isoform_104691	ko00195
isoform_104696	ko03013
isoform_104697	ko03010
isoform_104698	ko03010
isoform_104699	ko00195	ko01100
isoform_1047	ko00500	ko01100
isoform_104705	ko04130
isoform_104713	ko03050
isoform_104716	ko03010
isoform_104728	ko03013
isoform_104729	ko00196
isoform_104731	ko03010
isoform_104733	ko00195	ko01100
isoform_104734	ko03050
isoform_104739	ko00190	ko00195	ko01100
isoform_104740	ko00790
isoform_104742	ko00196	ko01100
isoform_104747	ko03060	ko04141	ko04145
isoform_104749	ko03022
isoform_10475	ko04075
isoform_104750	ko03015
isoform_104761	ko03060	ko04141	ko04145
isoform_104763	ko00196	ko01100
isoform_104765	ko00190	ko01100
isoform_104767	ko03010
isoform_104770	ko00860	ko01100	ko01110
isoform_104771	ko00630	ko00710	ko01100	ko01200	ko03010
isoform_104772	ko03010
isoform_104773	ko03010
isoform_104774	ko00010	ko00020	ko00620	ko01100	ko01110	ko01200
isoform_10478	ko00010	ko00020	ko00620	ko00710	ko01100	ko01110	ko01200
isoform_104785	ko00280	ko01100
isoform_104786	ko03020
isoform_10479	ko00500	ko00520	ko01100	ko01110
isoform_104793	ko03010
isoform_104797	ko00460	ko00500	ko00940	ko01100	ko01110
isoform_1048	ko00500	ko01100
isoform_104800	ko03010
isoform_104802	ko00010	ko00052	ko01100	ko01110
isoform_104806	ko03040
isoform_104808	ko00230	ko01100	ko01110
isoform_104811	ko00270	ko01100	ko01110	ko01230
isoform_104813	ko00195	ko01100
isoform_104825	ko03010
isoform_104833	ko03020
isoform_104834	ko03013
isoform_104836	ko03010
isoform_104837	ko00195	ko01100
isoform_104838	ko00130	ko01100	ko01110
isoform_10484	ko00010	ko00030	ko00051	ko00052	ko01100	ko01110	ko01200	ko01230	ko03018
isoform_104846	ko03010
isoform_104854	ko00062
isoform_104856	ko03010
isoform_104857	ko00195	ko01100
isoform_104859	ko00970
isoform_104862	ko03010
isoform_104864	ko03010
isoform_104867	ko03010
isoform_104872	ko00195
isoform_104876	ko03020
isoform_104878	ko00941	ko01100	ko01110
isoform_104886	ko04016	ko04070	ko04626
isoform_104890	ko00940	ko01100	ko01110
isoform_104893	ko03010
isoform_104895	ko00190	ko01100
isoform_104898	ko03010
isoform_1049	ko04144
isoform_10490	ko03450
isoform_104901	ko03013	ko03015	ko03040
isoform_104907	ko04144
isoform_10491	ko04626
isoform_104910	ko00190	ko01100	ko04145
isoform_104911	ko00500
isoform_104912	ko00220	ko01100	ko01110	ko01230
isoform_104913	ko00190	ko01100
isoform_104917	ko00750
isoform_104919	ko04145
isoform_104922	ko03022
isoform_104923	ko00630	ko01100
isoform_104924	ko00195	ko01100
isoform_104925	ko03010
isoform_104929	ko00190	ko01100
isoform_104938	ko00190	ko01100
isoform_10494	ko03018
isoform_104943	ko03010
isoform_104948	ko03020
isoform_10495	ko00062	ko01100	ko01110
isoform_104955	ko04120	ko04141
isoform_104961	ko00480
isoform_104965	ko00270	ko01100	ko01110	ko01230
isoform_104966	ko00053	ko00480
isoform_104971	ko00190	ko01100
isoform_104972	ko00062	ko01040	ko01100	ko01110	ko01212
isoform_104977	ko00040	ko01100
isoform_104979	ko00900	ko01100	ko01110
isoform_104984	ko00940	ko01100	ko01110
isoform_104986	ko00591
isoform_104987	ko03010
isoform_104988	ko00350	ko00360
isoform_104989	ko03010
isoform_10499	ko00564	ko01100
isoform_104991	ko03018
isoform_104995	ko04144
isoform_105	ko03013
isoform_1050	ko04144
isoform_105002	ko03010
isoform_105003	ko03020
isoform_105006	ko03010
isoform_10501	ko00010	ko00030	ko00500	ko00520	ko01100	ko01110	ko01200
isoform_105019	ko00010	ko00030	ko00051	ko00710	ko01100	ko01110	ko01200	ko01230
isoform_105020	ko00190	ko01100
isoform_105026	ko04120
isoform_105028	ko00196	ko01100
isoform_105030	ko03010
isoform_105038	ko00941	ko01100	ko01110
isoform_10504	ko00052	ko00511	ko00531	ko00600	ko00604	ko01100
isoform_105040	ko00196	ko01100
isoform_105043	ko03010
isoform_105047	ko00906	ko00943	ko01100	ko01110
isoform_10505	ko00071	ko00592	ko01100	ko01110	ko01212
isoform_105053	ko00195	ko01100
isoform_105057	ko00190	ko01100
isoform_105059	ko00020	ko00630	ko01100	ko01110	ko01200	ko01210	ko01230
isoform_105060	ko00860	ko01100	ko01110
isoform_105063	ko00750	ko01100
isoform_105065	ko03013
isoform_105066	ko00195	ko01100
isoform_105070	ko00620	ko00710	ko01100	ko01200
isoform_105078	ko00590	ko01100	ko04146
isoform_10508	ko00500	ko01100
isoform_105080	ko03010
isoform_105083	ko00730	ko01100
isoform_105086	ko00010	ko00071	ko00350	ko01100	ko01110	ko01200
isoform_105094	ko04144
isoform_105096	ko00270	ko01100	ko01110	ko01230
isoform_10510	ko04120	ko04144
isoform_105100	ko03020
isoform_105102	ko00061	ko00620	ko00640	ko01100	ko01110	ko01200	ko01212
isoform_105103	ko00010	ko00030	ko00051	ko00710	ko01100	ko01110	ko01200	ko01230
isoform_10511	ko00564
isoform_105111	ko03013	ko03015	ko03018
isoform_105112	ko03020
isoform_105120	ko00100	ko01100	ko01110
isoform_105121	ko03010
isoform_105124	ko00940	ko01100	ko01110
isoform_105129	ko04136
isoform_105130	ko04141	ko04626
isoform_105132	ko00130	ko00360	ko00940	ko00941	ko00945	ko01100	ko01110
isoform_105135	ko00062	ko01100	ko01212
isoform_105136	ko00563	ko01100
isoform_105139	ko03010
isoform_105140	ko03010
isoform_105144	ko03010
isoform_105147	ko03020
isoform_105149	ko00010	ko00030	ko01100	ko01200
isoform_10515	ko03050
isoform_105151	ko03010
isoform_105152	ko00195	ko01100
isoform_105155	ko00860	ko01100	ko01110
isoform_105157	ko03010
isoform_105159	ko00195	ko01100
isoform_105161	ko00520
isoform_105163	ko03013
isoform_105164	ko03013	ko03015
isoform_10517	ko00970
isoform_105170	ko04141
isoform_105172	ko03010
isoform_105176	ko00061
isoform_10518	ko04016	ko04075
isoform_105185	ko04016	ko04070	ko04626
isoform_105187	ko03010
isoform_10519	ko00860	ko01100	ko01110
isoform_1052	ko00460	ko00500	ko00940	ko01100	ko01110	ko03008	ko03018
isoform_105200	ko00860	ko01100	ko01110
isoform_105204	ko03010
isoform_105205	ko00190	ko01100
isoform_105206	ko03010
isoform_105207	ko00130	ko01100	ko01110
isoform_105209	ko03010
isoform_105219	ko04141
isoform_105220	ko00030	ko01100	ko01110	ko01200	ko01230
isoform_105222	ko03018	ko03040
isoform_105226	ko00196	ko01100
isoform_105227	ko00195	ko01100
isoform_10523	ko00906	ko01100	ko01110
isoform_105234	ko00760
isoform_105237	ko03013	ko03015
isoform_10524	ko00510	ko01100	ko04141
isoform_105241	ko03013
isoform_105242	ko00970
isoform_105245	ko04712
isoform_105247	ko00040	ko01100
isoform_105249	ko00960	ko01100	ko01110
isoform_105254	ko00190	ko01100
isoform_105259	ko00500	ko01100	ko01110
isoform_105261	ko00040	ko01100
isoform_105265	ko03010
isoform_10527	ko00380	ko01100
isoform_105270	ko03010
isoform_105273	ko04120	ko04144
isoform_105275	ko00071	ko00590	ko01100
isoform_10528	ko03013
isoform_105280	ko03010
isoform_105288	ko00260	ko00460	ko00630	ko00670	ko01100	ko01110	ko01200	ko01230
isoform_105292	ko00940	ko01100	ko01110
isoform_105293	ko00190	ko01100
isoform_1053	ko00514
isoform_105303	ko00040	ko01100
isoform_105305	ko00196	ko01100
isoform_105306	ko00010	ko00020	ko00620	ko01100	ko01110	ko01200
isoform_105309	ko00562	ko01100	ko04070	ko04144
isoform_10531	ko04075	ko04712
isoform_105311	ko00010	ko00053	ko00071	ko00280	ko00310	ko00330	ko00340	ko00380	ko00410	ko00561	ko00620	ko00903	ko01100	ko01110
isoform_105314	ko03040
isoform_105315	ko00195	ko01100
isoform_105318	ko03040
isoform_105320	ko00195	ko01100
isoform_105321	ko01100
isoform_105324	ko00010	ko00051	ko00562	ko00710	ko01100	ko01110	ko01200	ko01230	ko04144
isoform_105326	ko00220	ko00250	ko00910	ko01100	ko01200
isoform_10533	ko00360	ko00940	ko01100	ko01110
isoform_105332	ko00010	ko00030	ko00051	ko00710	ko01100	ko01110	ko01200	ko01230
isoform_105344	ko04712
isoform_10535	ko03010
isoform_105352	ko00190	ko01100	ko04145
isoform_105359	ko03030	ko03410	ko03420	ko03430	ko03440
isoform_10536	ko00330	ko00410	ko01100
isoform_105361	ko03010
isoform_105363	ko03013	ko03015	ko03040
isoform_105365	ko00592	ko01100	ko01110
isoform_105368	ko00940	ko01110	ko02010
isoform_105369	ko00190	ko01100
isoform_10537	ko04075
isoform_105371	ko00190	ko01100
isoform_105373	ko03010
isoform_105376	ko01100	ko01110
isoform_105377	ko03050
isoform_105379	ko00190	ko01100
isoform_10539	ko00561	ko01100
isoform_105393	ko03010
isoform_105394	ko00195	ko01100
isoform_105395	ko04146
isoform_105406	ko03013	ko03015	ko03040
isoform_105409	ko00250	ko00650	ko01100
isoform_10541	ko04120
isoform_105410	ko00860	ko01100	ko01110
isoform_105417	ko00860	ko01110
isoform_105418	ko00350	ko00950	ko01100	ko01110
isoform_105424	ko00670	ko00970
isoform_105427	ko00220	ko01100	ko01110	ko01230
isoform_105436	ko00195
isoform_105437	ko04144
isoform_10544	ko00941	ko00944	ko01100	ko01110
isoform_105440	ko00190	ko01100
isoform_105445	ko04626
isoform_105448	ko00430	ko01100
isoform_10545	ko03015	ko03040	ko04120
isoform_105450	ko00940	ko01100	ko01110	ko03020
isoform_105453	ko04141
isoform_105454	ko00195	ko01100
isoform_105455	ko00190	ko01100
isoform_105457	ko00630	ko00710	ko01100	ko01200
isoform_105458	ko03013
isoform_105460	ko04120
isoform_105463	ko03040
isoform_105464	ko00940	ko00941	ko00945	ko01100	ko01110
isoform_105466	ko00130	ko00360	ko00940	ko00941	ko00945	ko01100	ko01110
isoform_105469	ko03015
isoform_105475	ko04016	ko04075
isoform_105476	ko04016	ko04070	ko04626
isoform_105479	ko00360	ko00940	ko00941	ko00945	ko01100	ko01110
isoform_10548	ko03018
isoform_105481	ko00260	ko00460	ko00630	ko00670	ko01100	ko01110	ko01200	ko01230
isoform_105484	ko04146
isoform_105486	ko00020	ko00190	ko01100	ko01110	ko01200
isoform_105487	ko03010
isoform_10549	ko00071	ko00592	ko01040	ko01100	ko01110	ko01212	ko04146
isoform_105491	ko03010
isoform_105492	ko00040	ko01100
isoform_10550	ko04120	ko04141
isoform_105501	ko00190	ko01100
isoform_105503	ko00195
isoform_10551	ko00020	ko01100	ko01110
isoform_105519	ko03010
isoform_105522	ko00195	ko01100
isoform_105523	ko00190	ko01100
isoform_105527	ko03010
isoform_105528	ko00511
isoform_105529	ko00330	ko01100
isoform_105533	ko00260	ko00400	ko01100	ko01110	ko01230
isoform_105546	ko00860	ko01100	ko01110
isoform_105549	ko03010
isoform_10555	ko04016	ko04141
isoform_105550	ko03010
isoform_105553	ko00196	ko01100
isoform_105558	ko03010
isoform_105559	ko00480
isoform_105560	ko00195	ko01100
isoform_105568	ko04016	ko04626
isoform_105572	ko04120	ko04141
isoform_105578	ko00500	ko00520	ko01100	ko01110
isoform_10558	ko03013
isoform_105586	ko00020	ko00630	ko01100	ko01110	ko01200	ko01210	ko01230
isoform_10559	ko00500	ko01100
isoform_105591	ko00195
isoform_105598	ko03010
isoform_1056	ko03040
isoform_105606	ko04144
isoform_105611	ko00564
isoform_105612	ko04144	ko04145
isoform_105613	ko03010
isoform_105615	ko00195	ko01100
isoform_105623	ko00270	ko00450	ko01100	ko01110	ko01230
isoform_105633	ko00190	ko01100
isoform_105635	ko03050	ko03440
isoform_105636	ko03013
isoform_105637	ko00564	ko00565	ko00590	ko00591	ko00592	ko01100	ko01110
isoform_10564	ko00010	ko01100	ko01110
isoform_105645	ko00480
isoform_105649	ko00750	ko01100
isoform_10565	ko00910
isoform_105651	ko00190	ko01100
isoform_105653	ko00905	ko01100	ko01110
isoform_105654	ko03010
isoform_105655	ko03030	ko03420	ko03430	ko03440
isoform_105659	ko03010
isoform_105665	ko00053	ko01100
isoform_105668	ko03013
isoform_105675	ko03010
isoform_10568	ko00760	ko01100
isoform_105680	ko00904	ko01110
isoform_105684	ko00195	ko01100
isoform_105685	ko00460	ko00500	ko00940	ko01100	ko01110
isoform_105686	ko03013
isoform_105688	ko00520
isoform_105689	ko03050
isoform_105690	ko04016	ko04075	ko04626
isoform_105693	ko00380	ko00966	ko01110	ko01210
isoform_105696	ko03010
isoform_105697	ko03010
isoform_10570	ko04016	ko04141
isoform_105700	ko04075
isoform_105702	ko00710	ko01100	ko01200
isoform_105705	ko00190	ko01100
isoform_10571	ko03015
isoform_105715	ko03010
isoform_105719	ko00190	ko01100
isoform_10572	ko00590	ko01100
isoform_105720	ko00740	ko01100	ko01110
isoform_105724	ko03015
isoform_105732	ko00195	ko01100
isoform_105737	ko03060
isoform_10574	ko03430
isoform_105742	ko00940	ko01100	ko01110
isoform_105744	ko03010
isoform_105751	ko04075
isoform_105753	ko03010
isoform_105756	ko03013	ko03015	ko03040
isoform_105757	ko03040
isoform_105759	ko04144	ko04145
isoform_10576	ko00860	ko01100	ko01110
isoform_105760	ko00196	ko01100
isoform_105762	ko03060
[truncated: 110,841 more rows]
[truncated: 2 more columns]
