# Supplementary material for: Full-length transcriptome analysis of Adiantum flabellulatum gametophyte
Source: PeerJ. 2022 Mar 9;10:e13079. doi: 10.7717/peerj.13079 (PMC8917799; doi:10.7717/peerj.13079)
Supplement: Supplemental Information 7 [file peerj-10-13079-s007.xlsx]

## Sheet: Table.S6
Table S7 5 749 TFs were predicted by itak website
Family	ID
Alfin-like	isoform_103740
	isoform_104676
	isoform_114281
	isoform_145258
	isoform_155923
	isoform_163753
	isoform_164330
	isoform_164492
	isoform_176556
	isoform_183109
	isoform_189375
	isoform_190603
	isoform_210321
	isoform_212372
	isoform_220303
	isoform_229433
	isoform_232700
	isoform_237962
	isoform_245925
	isoform_250028
	isoform_251952
	isoform_259286
	isoform_288319
	isoform_299788
	isoform_303298
	isoform_313833
	isoform_313850
	isoform_316379
	isoform_317328
	isoform_50940
	isoform_51524
	isoform_52793
	isoform_57188
	isoform_58665
	isoform_58960
	isoform_61641
	isoform_62539
	isoform_330221
	isoform_352507
	isoform_38878
	isoform_43485
	isoform_43827
	isoform_46090
	isoform_47604
	isoform_48676
	isoform_49133
	isoform_49497
	isoform_65492
	isoform_76657
	isoform_76960
	isoform_89855
AP2/ERF-AP2	isoform_268605
	isoform_288304
AP2/ERF-ERF	isoform_133493
	isoform_133792
	isoform_136497
	isoform_136513
	isoform_136753
	isoform_136852
	isoform_137291
	isoform_138706
	isoform_141125
	isoform_141471
	isoform_144841
	isoform_145090
	isoform_149749
	isoform_150289
	isoform_155475
	isoform_156108
	isoform_156715
	isoform_157091
	isoform_159007
	isoform_159465
	isoform_162141
	isoform_163633
	isoform_166389
	isoform_167493
	isoform_172049
	isoform_172226
	isoform_173402
	isoform_173452
	isoform_175390
	isoform_179935
	isoform_11014
	isoform_13369
	isoform_14339
	isoform_15276
	isoform_15768
	isoform_16380
	isoform_16940
	isoform_17931
	isoform_184087
	isoform_186650
	isoform_187907
	isoform_188579
	isoform_189950
	isoform_191545
	isoform_191644
	isoform_191785
	isoform_192350
	isoform_194605
	isoform_194622
	isoform_196333
	isoform_198838
	isoform_199078
	isoform_199696
	isoform_200355
	isoform_200364
	isoform_201720
	isoform_203147
	isoform_203948
	isoform_210508
	isoform_212330
	isoform_215782
	isoform_215963
	isoform_218458
	isoform_222749
	isoform_226435
	isoform_227387
	isoform_228851
	isoform_233031
	isoform_241286
	isoform_241999
	isoform_242848
	isoform_243202
	isoform_245759
	isoform_247033
	isoform_250642
	isoform_252902
	isoform_253700
	isoform_18481
	isoform_18575
	isoform_18977
	isoform_19258
	isoform_20036
	isoform_21572
	isoform_21987
	isoform_22087
	isoform_23088
	isoform_23201
	isoform_23286
	isoform_24072
	isoform_24723
	isoform_25159
	isoform_25174
	isoform_25195
	isoform_255000
	isoform_255461
	isoform_255606
	isoform_255778
	isoform_257866
	isoform_259927
	isoform_263583
	isoform_265317
	isoform_268944
	isoform_269302
	isoform_272009
	isoform_272370
	isoform_273155
	isoform_280498
	isoform_280696
	isoform_282518
	isoform_286230
	isoform_288209
	isoform_288560
	isoform_292250
	isoform_295335
	isoform_297688
	isoform_299731
	isoform_300256
	isoform_303930
	isoform_305394
	isoform_305524
	isoform_306821
	isoform_307898
	isoform_310882
	isoform_313824
	isoform_315379
	isoform_316834
	isoform_317959
	isoform_319835
	isoform_322404
	isoform_322441
	isoform_324397
	isoform_25521
	isoform_25710
	isoform_27975
	isoform_28179
	isoform_28796
	isoform_29443
	isoform_30980
	isoform_31030
	isoform_31044
	isoform_31566
	isoform_51904
	isoform_51968
	isoform_53684
	isoform_53818
	isoform_53970
	isoform_56060
	isoform_56138
	isoform_56713
	isoform_57972
	isoform_60469
	isoform_60878
	isoform_61792
	isoform_62019
	isoform_4851
	isoform_5387
	isoform_5934
	isoform_6081
	isoform_329164
	isoform_332144
	isoform_334158
	isoform_336892
	isoform_339760
	isoform_342372
	isoform_343807
	isoform_345499
	isoform_345760
	isoform_345981
	isoform_346186
	isoform_349466
	isoform_351574
	isoform_352772
	isoform_353585
	isoform_35536
	isoform_35813
	isoform_35935
	isoform_36955
	isoform_38379
	isoform_40521
	isoform_42314
	isoform_42760
	isoform_43231
	isoform_43713
	isoform_43767
	isoform_44032
	isoform_45288
	isoform_46381
	isoform_46749
	isoform_47611
	isoform_47875
	isoform_48095
	isoform_48624
	isoform_49315
	isoform_65462
	isoform_66771
	isoform_69457
	isoform_69551
	isoform_71999
	isoform_75170
	isoform_80174
	isoform_89239
	isoform_92878
	isoform_94897
	isoform_97204
	isoform_7917
	isoform_8141
	isoform_9017
AP2/ERF-RAV	isoform_176594
	isoform_350019
B3	isoform_101047
	isoform_111992
	isoform_154141
	isoform_158941
	isoform_165026
	isoform_165438
	isoform_168538
	isoform_178353
	isoform_182151
	isoform_183267
	isoform_185291
	isoform_191132
	isoform_191828
	isoform_193201
	isoform_196513
	isoform_197833
	isoform_198447
	isoform_209743
	isoform_218659
	isoform_219117
	isoform_220470
	isoform_223863
	isoform_230937
	isoform_233044
	isoform_236334
	isoform_240419
	isoform_248448
	isoform_248604
	isoform_249731
	isoform_251820
	isoform_252403
	isoform_2099
	isoform_255306
	isoform_259223
	isoform_261641
	isoform_262337
	isoform_271710
	isoform_273003
	isoform_273583
	isoform_277683
	isoform_278966
	isoform_286193
	isoform_288380
	isoform_289693
	isoform_292938
	isoform_295921
	isoform_297712
	isoform_305244
	isoform_306766
	isoform_313553
	isoform_315946
	isoform_318247
	isoform_321667
	isoform_323231
	isoform_3422
	isoform_5058
	isoform_5418
	isoform_6392
	isoform_326832
	isoform_327535
	isoform_329181
	isoform_332137
	isoform_332843
	isoform_336780
	isoform_352698
	isoform_352959
	isoform_354125
	isoform_32595
	isoform_32694
	isoform_33348
	isoform_36326
	isoform_36918
	isoform_39046
	isoform_43327
	isoform_65945
	isoform_71425
	isoform_72270
	isoform_77668
	isoform_82375
	isoform_98205
	isoform_8382
	isoform_8494
	isoform_9605
B3-ARF	isoform_135630
	isoform_171979
	isoform_10095
	isoform_185583
	isoform_221356
	isoform_227703
	isoform_234465
	isoform_242816
	isoform_2173
	isoform_273267
	isoform_279055
	isoform_297329
	isoform_305868
	isoform_2601
	isoform_3208
	isoform_341230
BBR-BPC	isoform_100487
	isoform_138088
	isoform_138320
	isoform_141874
	isoform_143468
	isoform_146321
	isoform_148107
	isoform_148641
	isoform_156314
	isoform_157582
	isoform_160648
	isoform_171579
	isoform_174456
	isoform_177741
	isoform_180880
	isoform_188092
	isoform_191777
	isoform_196412
	isoform_204254
	isoform_208269
	isoform_221703
	isoform_225539
	isoform_230340
	isoform_236084
	isoform_238410
	isoform_243539
	isoform_243820
	isoform_248463
	isoform_248479
	isoform_248767
	isoform_260241
	isoform_260787
	isoform_264623
	isoform_291263
	isoform_291434
	isoform_313069
	isoform_316276
	isoform_319353
	isoform_319754
	isoform_28005
	isoform_29079
	isoform_30109
	isoform_31435
	isoform_32012
	isoform_51018
	isoform_51768
	isoform_51977
	isoform_51990
	isoform_52166
	isoform_52399
	isoform_55489
	isoform_55557
	isoform_57328
	isoform_63838
	isoform_334809
	isoform_336976
	isoform_342190
	isoform_347778
	isoform_351475
	isoform_33090
	isoform_33108
	isoform_34276
	isoform_36051
	isoform_36261
	isoform_36814
	isoform_37326
	isoform_37329
	isoform_38343
	isoform_38403
	isoform_38765
	isoform_39699
	isoform_39946
	isoform_40460
	isoform_41664
	isoform_42158
	isoform_42608
	isoform_42776
	isoform_43027
	isoform_43036
	isoform_44246
	isoform_44510
	isoform_44718
	isoform_44765
	isoform_44983
	isoform_45014
	isoform_45277
	isoform_45691
	isoform_46226
	isoform_46984
	isoform_47280
	isoform_47432
	isoform_48101
	isoform_48589
	isoform_48823
	isoform_49756
	isoform_49947
	isoform_72574
	isoform_94780
	isoform_95818
	isoform_96802
	isoform_98936
BES1	isoform_135493
	isoform_148936
	isoform_151071
	isoform_161047
	isoform_166017
	isoform_171216
	isoform_171230
	isoform_172554
	isoform_176204
	isoform_14527
	isoform_15092
	isoform_18211
	isoform_185103
	isoform_185376
	isoform_193049
	isoform_193232
	isoform_195909
	isoform_202627
	isoform_214240
	isoform_215646
	isoform_216453
	isoform_237429
	isoform_238046
	isoform_240773
	isoform_244070
	isoform_245248
	isoform_246425
	isoform_18769
	isoform_19381
	isoform_19975
	isoform_21322
	isoform_21668
	isoform_24745
	isoform_266158
	isoform_273411
	isoform_276445
	isoform_282841
	isoform_283569
	isoform_286175
	isoform_290329
	isoform_291692
	isoform_294132
	isoform_294412
	isoform_297437
	isoform_302702
	isoform_304539
	isoform_314366
	isoform_315820
	isoform_318943
	isoform_27703
	isoform_27801
	isoform_28729
	isoform_30143
	isoform_31242
	isoform_32196
	isoform_32334
	isoform_5430
	isoform_332680
	isoform_335395
	isoform_335602
	isoform_339158
	isoform_340548
	isoform_345919
	isoform_347782
	isoform_349193
	isoform_32918
	isoform_34232
	isoform_34236
	isoform_35223
	isoform_36854
	isoform_39390
	isoform_40083
	isoform_40651
	isoform_72122
	isoform_85110
	isoform_7438
bHLH	isoform_102006
	isoform_108703
	isoform_133627
	isoform_133805
	isoform_136336
	isoform_137099
	isoform_137414
	isoform_137496
	isoform_137545
	isoform_139120
	isoform_140135
	isoform_140821
	isoform_143017
	isoform_144297
	isoform_144820
	isoform_146418
	isoform_146419
	isoform_146986
	isoform_147079
	isoform_147302
	isoform_147371
	isoform_147580
	isoform_148038
	isoform_149052
	isoform_151347
	isoform_152966
	isoform_153586
	isoform_153816
	isoform_154230
	isoform_154371
	isoform_155092
	isoform_155103
	isoform_155330
	isoform_155357
	isoform_155502
	isoform_155699
	isoform_156215
	isoform_157217
	isoform_157288
	isoform_159145
	isoform_159572
	isoform_160304
	isoform_160924
	isoform_161168
	isoform_162058
	isoform_162083
	isoform_162116
	isoform_163826
	isoform_165730
	isoform_166415
	isoform_167641
	isoform_168440
	isoform_169713
	isoform_170139
	isoform_170422
	isoform_173273
	isoform_176073
	isoform_176511
	isoform_178038
	isoform_178050
	isoform_178692
	isoform_179296
	isoform_179572
	isoform_180335
	isoform_181851
	isoform_183213
	isoform_183356
	isoform_10087
	isoform_10518
	isoform_10531
	isoform_10639
	isoform_10745
	isoform_11825
	isoform_11909
	isoform_12558
	isoform_13287
	isoform_13906
	isoform_13944
	isoform_14125
	isoform_14297
	isoform_14415
	isoform_15172
	isoform_15501
	isoform_15735
	isoform_16165
	isoform_16557
	isoform_17034
	isoform_17450
	isoform_17803
	isoform_17939
	isoform_1375
	isoform_1811
	isoform_184570
	isoform_185060
	isoform_185125
	isoform_185507
	isoform_186121
	isoform_186776
	isoform_186993
	isoform_187491
	isoform_187553
	isoform_190441
	isoform_190996
	isoform_191160
	isoform_191574
	isoform_192834
	isoform_193702
	isoform_194035
	isoform_194362
	isoform_195112
	isoform_195606
	isoform_196785
	isoform_197078
	isoform_197320
	isoform_197337
	isoform_197642
	isoform_197939
	isoform_198010
	isoform_198356
	isoform_198670
	isoform_201320
	isoform_201391
	isoform_202105
	isoform_202227
	isoform_202395
	isoform_202894
	isoform_206504
	isoform_208775
	isoform_210952
	isoform_211961
	isoform_212868
	isoform_214830
	isoform_216117
	isoform_216770
	isoform_217083
	isoform_219534
	isoform_219731
	isoform_219804
	isoform_222474
	isoform_222600
	isoform_222928
	isoform_223138
	isoform_223288
	isoform_223588
	isoform_224200
	isoform_225126
	isoform_225403
	isoform_226462
	isoform_226743
	isoform_228350
	isoform_229048
	isoform_229111
	isoform_229551
	isoform_230123
	isoform_230345
	isoform_230685
	isoform_231692
	isoform_234349
	isoform_235401
	isoform_237363
	isoform_237919
	isoform_240335
	isoform_240659
	isoform_241744
	isoform_244173
	isoform_244743
	isoform_245458
	isoform_246061
	isoform_246651
	isoform_252115
	isoform_252180
	isoform_252216
	isoform_252776
	isoform_18484
	isoform_18693
	isoform_18829
	isoform_18957
	isoform_19189
	isoform_19364
	isoform_19421
	isoform_20283
	isoform_20354
	isoform_20468
	isoform_20564
	isoform_20598
	isoform_20887
	isoform_20963
	isoform_21321
	isoform_22099
	isoform_22965
	isoform_23043
	isoform_23122
	isoform_23564
	isoform_24588
	isoform_2446
	isoform_2459
	isoform_2504
	isoform_255217
	isoform_255654
	isoform_256685
	isoform_256723
	isoform_257148
	isoform_257415
	isoform_257619
	isoform_258168
	isoform_258276
	isoform_258890
	isoform_258942
	isoform_259596
	isoform_260605
	isoform_261008
	isoform_261073
	isoform_261246
	isoform_263874
	isoform_264547
	isoform_264636
	isoform_264929
	isoform_266326
	isoform_267629
	isoform_267821
	isoform_268827
	isoform_269283
	isoform_270171
	isoform_271727
	isoform_271964
	isoform_272146
	isoform_273278
	isoform_273478
	isoform_273590
	isoform_275085
	isoform_275299
	isoform_275675
	isoform_276462
	isoform_276834
	isoform_276987
	isoform_278231
	isoform_278423
	isoform_278634
	isoform_279247
	isoform_279370
	isoform_280110
	isoform_280851
	isoform_281013
	isoform_282081
	isoform_283746
	isoform_283750
	isoform_285203
	isoform_286566
	isoform_287149
	isoform_287198
	isoform_288056
	isoform_288100
	isoform_288370
	isoform_288763
	isoform_289676
	isoform_290135
	isoform_292610
	isoform_295189
	isoform_295675
	isoform_297137
	isoform_297322
	isoform_297751
	isoform_297909
	isoform_299262
	isoform_299271
	isoform_299288
	isoform_299358
	isoform_300409
	isoform_301029
	isoform_302846
	isoform_304157
	isoform_304166
	isoform_304288
	isoform_304582
	isoform_306849
	isoform_306920
	isoform_307027
	isoform_307044
	isoform_307369
	isoform_307763
	isoform_308075
	isoform_308122
	isoform_308332
	isoform_309887
	isoform_310389
	isoform_312267
	isoform_312607
	isoform_313867
	isoform_314516
	isoform_314708
	isoform_315776
	isoform_317618
	isoform_317987
	isoform_318077
	isoform_318361
	isoform_319397
	isoform_320387
	isoform_320407
	isoform_320905
	isoform_322610
	isoform_323197
	isoform_323252
	isoform_323608
	isoform_27543
	isoform_28845
	isoform_28906
	isoform_30840
	isoform_30996
	isoform_32075
	isoform_32279
	isoform_50695
	isoform_51398
	isoform_51929
	isoform_51971
	isoform_52067
	isoform_52731
	isoform_55052
	isoform_57331
	isoform_57825
	isoform_58347
	isoform_59097
	isoform_3941
	isoform_60197
	isoform_60589
	isoform_4042
	isoform_61927
	isoform_63488
	isoform_4231
	isoform_4326
	isoform_4505
	isoform_4651
	isoform_4977
	isoform_5145
	isoform_5218
	isoform_5300
	isoform_5331
	isoform_5359
	isoform_5447
	isoform_5655
	isoform_6089
	isoform_6146
	isoform_6151
	isoform_6380
	isoform_325063
	isoform_325261
	isoform_326559
	isoform_327085
	isoform_328576
	isoform_328815
	isoform_331686
	isoform_332092
	isoform_333879
	isoform_334219
	isoform_334886
	isoform_336590
	isoform_337181
	isoform_337549
	isoform_338002
	isoform_338086
	isoform_338699
	isoform_338996
	isoform_339292
	isoform_341278
	isoform_341667
	isoform_342420
	isoform_344785
	isoform_344861
	isoform_347342
	isoform_349302
	isoform_349383
	isoform_349543
	isoform_350113
	isoform_351351
	isoform_351718
	isoform_351943
	isoform_352098
	isoform_353379
	isoform_353838
	isoform_33851
	isoform_35455
	isoform_36647
	isoform_37066
	isoform_37515
	isoform_37598
	isoform_38149
	isoform_38278
	isoform_38965
	isoform_39701
	isoform_39720
	isoform_40036
	isoform_40175
	isoform_40428
	isoform_40760
	isoform_40858
	isoform_41264
	isoform_41449
	isoform_41547
	isoform_41889
	isoform_41967
	isoform_41997
	isoform_42064
	isoform_42385
	isoform_43562
	isoform_43606
	isoform_43665
	isoform_43926
	isoform_45065
	isoform_45377
	isoform_45559
	isoform_45696
	isoform_45835
	isoform_46139
	isoform_46741
	isoform_47029
	isoform_47670
	isoform_47680
	isoform_48112
	isoform_48210
	isoform_48321
	isoform_3301
	isoform_49065
	isoform_50090
	isoform_64318
	isoform_65259
	isoform_69131
	isoform_69172
	isoform_69303
	isoform_69443
	isoform_71489
	isoform_73588
	isoform_75531
	isoform_78088
	isoform_78623
	isoform_79442
	isoform_82342
	isoform_83407
	isoform_86386
	isoform_88199
	isoform_96698
	isoform_7078
	isoform_7123
	isoform_7230
	isoform_7400
	isoform_7688
	isoform_7863
	isoform_8004
	isoform_8686
	isoform_8963
	isoform_9793
bZIP	isoform_135180
	isoform_137468
	isoform_138967
	isoform_141330
	isoform_144290
	isoform_146940
	isoform_148741
	isoform_149286
	isoform_149389
	isoform_151421
	isoform_152725
	isoform_154284
	isoform_154593
	isoform_154645
	isoform_156387
	isoform_157575
	isoform_158189
	isoform_159073
	isoform_159916
	isoform_161044
	isoform_162105
	isoform_162273
	isoform_163782
	isoform_164455
	isoform_167034
	isoform_168805
	isoform_170405
	isoform_170522
	isoform_170667
	isoform_173308
	isoform_174243
	isoform_176316
	isoform_176593
	isoform_177858
	isoform_179372
	isoform_10059
	isoform_10142
	isoform_10345
	isoform_10475
	isoform_10587
	isoform_10705
	isoform_10895
	isoform_11195
	isoform_11641
	isoform_11804
	isoform_12014
	isoform_12740
	isoform_13247
	isoform_13453
	isoform_13788
	isoform_13804
	isoform_13896
	isoform_13911
	isoform_14085
	isoform_14172
	isoform_14177
	isoform_14372
	isoform_14456
	isoform_14493
	isoform_14692
	isoform_14774
	isoform_14806
	isoform_14813
	isoform_15087
	isoform_15156
	isoform_15169
	isoform_15333
	isoform_15441
	isoform_15499
	isoform_15500
	isoform_15624
	isoform_15960
	isoform_16043
	isoform_16332
	isoform_17306
	isoform_17323
	isoform_17418
	isoform_17428
	isoform_17962
	isoform_1836
	isoform_184063
	isoform_184636
	isoform_185670
	isoform_185816
	isoform_186875
	isoform_189175
	isoform_189576
	isoform_192053
	isoform_192573
	isoform_192817
	isoform_194298
	isoform_195596
	isoform_196496
	isoform_196852
	isoform_199828
	isoform_200235
	isoform_200877
	isoform_202609
	isoform_205116
	isoform_206408
	isoform_207985
	isoform_211286
	isoform_211314
	isoform_211909
	isoform_211976
	isoform_212399
	isoform_213986
	isoform_216002
	isoform_216239
	isoform_216347
	isoform_220026
	isoform_225661
	isoform_226194
	isoform_227711
	isoform_229016
	isoform_229181
	isoform_230700
	isoform_233751
	isoform_235198
	isoform_238044
	isoform_239749
	isoform_239788
	isoform_242623
	isoform_243024
	isoform_244709
	isoform_244849
	isoform_246254
	isoform_248081
	isoform_250577
	isoform_251484
	isoform_251578
	isoform_252802
	isoform_253818
	isoform_18804
	isoform_19130
	isoform_19144
	isoform_19629
	isoform_20061
	isoform_20365
	isoform_20741
	isoform_20864
	isoform_20965
	isoform_21144
	isoform_22764
	isoform_22980
	isoform_24836
	isoform_25215
	isoform_254252
	isoform_254338
	isoform_254356
	isoform_255218
	isoform_255311
	isoform_257180
	isoform_258807
	isoform_260468
	isoform_260523
	isoform_263548
	isoform_264373
	isoform_264609
	isoform_269180
	isoform_269237
	isoform_269270
	isoform_271404
	isoform_272702
	isoform_273536
	isoform_275381
	isoform_281148
	isoform_281973
	isoform_282298
	isoform_283629
	isoform_283858
	isoform_283874
	isoform_284246
	isoform_284345
	isoform_287312
	isoform_287532
	isoform_287847
	isoform_288061
	isoform_293979
	isoform_295668
	isoform_296159
	isoform_296849
	isoform_296859
	isoform_300962
	isoform_302191
	isoform_303579
	isoform_305325
	isoform_305403
	isoform_307442
	isoform_307473
	isoform_307971
	isoform_308076
	isoform_309369
	isoform_310492
	isoform_310550
	isoform_310587
	isoform_315451
	isoform_316008
	isoform_317213
	isoform_319243
	isoform_320146
	isoform_321091
	isoform_322243
	isoform_322475
	isoform_25440
	isoform_26488
	isoform_26958
	isoform_27653
	isoform_28255
	isoform_29152
	isoform_30238
	isoform_30300
	isoform_30484
	isoform_2984
	isoform_51951
	isoform_52689
	isoform_53957
	isoform_55087
	isoform_55259
	isoform_55389
	isoform_56028
	isoform_57004
	isoform_57310
	isoform_3815
	isoform_57965
	isoform_59271
	isoform_59400
	isoform_62217
	isoform_4122
	isoform_63358
	isoform_5196
	isoform_325563
	isoform_326797
	isoform_329029
	isoform_332350
	isoform_332838
	isoform_334415
	isoform_339120
	isoform_340390
	isoform_341996
	isoform_342080
	isoform_342579
	isoform_344804
	isoform_345339
	isoform_345358
	isoform_345821
	isoform_349937
	isoform_350274
	isoform_351278
	isoform_351894
	isoform_33369
	isoform_33579
	isoform_34298
	isoform_35886
	isoform_37570
	isoform_39075
	isoform_40037
	isoform_41234
	isoform_41845
	isoform_42119
	isoform_42317
	isoform_42502
	isoform_44597
	isoform_44676
	isoform_45576
	isoform_46340
	isoform_46424
	isoform_47019
	isoform_48453
	isoform_48939
	isoform_49490
	isoform_49659
	isoform_65191
	isoform_65672
	isoform_65852
	isoform_66682
	isoform_67088
	isoform_67436
	isoform_68760
	isoform_72024
	isoform_72694
	isoform_74731
	isoform_75439
	isoform_78968
	isoform_85596
	isoform_86398
	isoform_87296
	isoform_93933
	isoform_98117
	isoform_99610
	isoform_8090
	isoform_8157
	isoform_8502
	isoform_8662
	isoform_9025
	isoform_9455
	isoform_9509
	isoform_9871
C2C2-CO-like	isoform_147809
	isoform_149428
	isoform_155884
	isoform_10396
	isoform_13194
	isoform_13362
	isoform_185844
	isoform_205628
	isoform_232685
	isoform_19552
	isoform_19945
	isoform_21543
	isoform_23047
	isoform_259803
	isoform_264086
	isoform_284458
	isoform_28927
	isoform_51215
	isoform_53339
	isoform_56467
	isoform_5754
	isoform_6153
	isoform_33980
	isoform_38197
	isoform_38351
	isoform_38522
	isoform_40233
	isoform_40939
	isoform_42066
	isoform_42176
	isoform_43688
	isoform_44859
	isoform_49196
C2C2-Dof	isoform_139866
	isoform_140752
	isoform_158267
	isoform_164141
	isoform_167887
	isoform_170228
	isoform_179231
	isoform_11032
	isoform_11130
	isoform_11580
	isoform_12110
	isoform_12134
	isoform_12459
	isoform_14721
	isoform_15404
	isoform_16289
	isoform_16770
	isoform_17587
	isoform_18266
	isoform_188734
	isoform_196210
	isoform_199101
	isoform_200502
	isoform_201139
	isoform_204240
	isoform_207821
	isoform_213662
	isoform_217801
	isoform_222631
	isoform_234291
	isoform_235137
	isoform_238772
	isoform_246388
	isoform_249591
	isoform_19063
	isoform_21387
	isoform_23071
	isoform_254095
	isoform_254390
	isoform_255783
	isoform_258655
	isoform_260534
	isoform_263234
	isoform_266581
	isoform_267955
	isoform_268931
	isoform_274959
	isoform_278790
	isoform_278893
	isoform_281501
	isoform_287259
	isoform_290545
	isoform_293547
	isoform_296132
	isoform_301829
	isoform_323341
	isoform_29147
	isoform_30113
	isoform_31047
	isoform_31599
	isoform_5769
	isoform_325570
	isoform_326921
	isoform_334772
	isoform_336410
	isoform_339135
	isoform_339389
	isoform_341642
	isoform_342077
	isoform_33063
	isoform_33144
	isoform_33289
	isoform_34373
	isoform_34545
	isoform_35787
	isoform_36302
	isoform_38796
	isoform_43826
	isoform_8091
	isoform_8325
	isoform_8942
	isoform_9074
C2C2-GATA	isoform_103376
	isoform_119370
	isoform_139736
	isoform_140519
	isoform_152043
	isoform_153163
	isoform_158324
	isoform_159463
	isoform_161740
	isoform_163977
	isoform_164906
	isoform_166348
	isoform_167055
	isoform_169790
	isoform_171917
	isoform_173039
	isoform_174192
	isoform_182099
	isoform_10316
	isoform_11113
	isoform_11225
	isoform_11999
	isoform_12391
	isoform_14316
	isoform_14951
	isoform_15848
	isoform_16364
	isoform_17164
	isoform_185712
	isoform_186822
	isoform_188520
	isoform_189822
	isoform_189927
	isoform_203591
	isoform_204052
	isoform_208961
	isoform_210615
	isoform_211051
	isoform_215628
	isoform_222398
	isoform_227645
	isoform_227968
	isoform_234191
	isoform_237809
	isoform_245634
	isoform_248147
	isoform_250232
	isoform_251429
	isoform_252710
	isoform_18718
	isoform_18823
	isoform_19688
	isoform_20809
	isoform_20916
	isoform_22852
	isoform_23284
	isoform_23750
	isoform_254681
	isoform_255798
	isoform_263584
	isoform_266572
	isoform_268547
	isoform_270124
	isoform_275292
	isoform_280288
	isoform_287914
	isoform_288371
	isoform_291536
	isoform_309195
	isoform_313794
	isoform_314968
	isoform_316114
	isoform_319945
	isoform_25989
	isoform_26519
	isoform_28202
	isoform_28352
	isoform_28434
	isoform_28551
	isoform_28671
	isoform_29716
	isoform_53128
	isoform_55303
	isoform_330825
	isoform_331530
	isoform_334091
	isoform_340653
	isoform_342448
	isoform_346379
	isoform_353599
	isoform_37007
	isoform_43808
	isoform_43936
	isoform_49293
	isoform_96887
	isoform_99542
C2C2-LSD	isoform_165607
	isoform_181505
	isoform_190727
	isoform_219413
	isoform_237093
	isoform_266351
	isoform_289040
	isoform_294702
	isoform_52826
	isoform_53369
	isoform_53794
	isoform_54596
	isoform_56835
	isoform_57739
	isoform_62056
	isoform_63072
	isoform_46622
	isoform_46990
	isoform_48626
	isoform_49625
	isoform_49780
	isoform_50261
	isoform_64978
	isoform_73207
C2H2	isoform_106262
	isoform_107659
	isoform_112018
	isoform_122620
	isoform_137515
	isoform_138140
	isoform_139285
	isoform_139386
	isoform_139495
	isoform_139724
	isoform_139747
	isoform_140036
	isoform_140958
	isoform_142002
	isoform_144697
	isoform_145568
	isoform_147342
	isoform_149332
	isoform_150038
	isoform_150515
	isoform_152055
	isoform_152272
	isoform_153082
	isoform_153571
	isoform_154702
	isoform_155148
	isoform_156866
	isoform_157322
	isoform_159292
	isoform_159382
	isoform_159470
	isoform_159621
	isoform_159889
	isoform_160560
	isoform_161317
	isoform_162129
	isoform_162964
	isoform_164806
	isoform_165699
	isoform_166543
	isoform_167315
	isoform_170502
	isoform_171360
	isoform_174269
	isoform_174437
	isoform_175577
	isoform_176340
	isoform_177096
	isoform_178272
	isoform_182016
	isoform_182329
	isoform_182397
	isoform_10304
	isoform_10504
	isoform_10562
	isoform_10664
	isoform_10743
	isoform_10826
	isoform_11009
	isoform_11172
	isoform_11480
	isoform_11509
	isoform_11696
	isoform_11880
	isoform_12989
	isoform_13007
	isoform_13604
	isoform_13743
	isoform_13855
	isoform_14365
	isoform_14766
	isoform_15450
	isoform_15979
	isoform_1203
	isoform_1204
	isoform_16607
	isoform_1283
	isoform_185954
	isoform_186488
	isoform_186649
	isoform_186833
	isoform_187213
	isoform_187221
	isoform_188983
	isoform_190025
	isoform_191067
	isoform_191528
	isoform_192702
	isoform_193583
	isoform_194662
	isoform_194863
	isoform_195180
	isoform_197457
	isoform_198658
	isoform_199451
	isoform_201154
	isoform_202453
	isoform_204310
	isoform_204371
	isoform_206680
	isoform_208080
	isoform_209388
	isoform_211277
	isoform_211536
	isoform_212258
	isoform_212938
	isoform_214265
	isoform_214993
	isoform_215793
	isoform_218557
	isoform_219227
	isoform_220044
	isoform_220991
	isoform_221060
	isoform_222762
	isoform_222824
	isoform_223530
	isoform_223609
	isoform_224036
	isoform_225904
	isoform_226650
	isoform_229424
	isoform_231637
	isoform_232390
	isoform_235596
	isoform_235824
	isoform_236782
	isoform_237455
	isoform_238047
	isoform_239017
	isoform_240598
	isoform_240792
	isoform_240880
	isoform_241142
	isoform_242732
	isoform_246072
	isoform_248184
	isoform_248970
	isoform_251646
	isoform_19074
	isoform_19295
	isoform_21134
	isoform_22234
	isoform_2323
	isoform_2442
	isoform_313
	isoform_254455
	isoform_256455
	isoform_256839
	isoform_258783
	isoform_260019
	isoform_261171
	isoform_262808
	isoform_264238
	isoform_264509
	isoform_265001
	isoform_265204
	isoform_265759
	isoform_266420
	isoform_266431
	isoform_266618
	isoform_268776
	isoform_268858
	isoform_268914
	isoform_270465
	isoform_272799
	isoform_275048
	isoform_275056
	isoform_275512
	isoform_276461
	isoform_276532
	isoform_276631
	isoform_276882
	isoform_278415
	isoform_279014
	isoform_279701
	isoform_279852
	isoform_279989
	isoform_280598
	isoform_280961
	isoform_281129
	isoform_281616
	isoform_285041
	isoform_288612
	isoform_288812
	isoform_288853
	isoform_289806
	isoform_293340
	isoform_293841
	isoform_295239
	isoform_296995
	isoform_298355
	isoform_298640
	isoform_298904
	isoform_301028
	isoform_301109
	isoform_302757
	isoform_302936
	isoform_303964
	isoform_304392
	isoform_304908
	isoform_306263
	isoform_307948
	isoform_308479
	isoform_309726
	isoform_310230
	isoform_315065
	isoform_316081
	isoform_317684
	isoform_319978
	isoform_320574
	isoform_321344
	isoform_322145
	isoform_324398
	isoform_25433
	isoform_26136
	isoform_26572
	isoform_27171
	isoform_27423
	isoform_27428
	isoform_28585
	isoform_30835
	isoform_31365
	isoform_32031
	isoform_32039
	isoform_3221
	isoform_3398
	isoform_51074
	isoform_52004
	isoform_52159
	isoform_52373
	isoform_52799
	isoform_53103
	isoform_54281
	isoform_58987
	isoform_4007
	isoform_63351
	isoform_63890
	isoform_4716
	isoform_4801
	isoform_4932
	isoform_5017
	isoform_5323
	isoform_5376
	isoform_5906
	isoform_6013
	isoform_6126
	isoform_325511
	isoform_325544
	isoform_327342
	isoform_330606
	isoform_331705
	isoform_332276
	isoform_333288
	isoform_335861
	isoform_336352
	isoform_337335
	isoform_338595
	isoform_340722
	isoform_344052
	isoform_345334
	isoform_346381
	isoform_347315
	isoform_348936
	isoform_351758
	isoform_353122
	isoform_353850
	isoform_354159
	isoform_33192
	isoform_33223
	isoform_34486
	isoform_35321
	isoform_35989
	isoform_36650
	isoform_36754
	isoform_37321
	isoform_37372
	isoform_38172
	isoform_38579
	isoform_39007
	isoform_39665
	isoform_39795
	isoform_40313
	isoform_40390
	isoform_40571
	isoform_40616
	isoform_40829
	isoform_41714
	isoform_42455
	isoform_42495
	isoform_42894
	isoform_43004
	isoform_43239
	isoform_43652
	isoform_43659
	isoform_47140
	isoform_47398
	isoform_47707
	isoform_49660
	isoform_49906
	isoform_50230
	isoform_69433
	isoform_70793
	isoform_72189
	isoform_75330
	isoform_78029
	isoform_95393
	isoform_96930
	isoform_97067
	isoform_98804
	isoform_6947
	isoform_6960
	isoform_7195
	isoform_7246
	isoform_7396
	isoform_7459
	isoform_7472
	isoform_7671
	isoform_7675
	isoform_7768
	isoform_7823
	isoform_8125
	isoform_8202
	isoform_8274
	isoform_8363
	isoform_8539
	isoform_8916
	isoform_8977
	isoform_9094
	isoform_9234
	isoform_9572
	isoform_9611
	isoform_9961
C3H	isoform_102842
	isoform_104383
	isoform_105065
	isoform_105067
	isoform_106657
	isoform_109661
	isoform_117407
	isoform_133249
	isoform_135031
	isoform_135559
	isoform_135663
	isoform_135958
	isoform_136137
	isoform_136162
	isoform_137133
	isoform_137317
	isoform_137404
	isoform_138370
	isoform_138879
	isoform_138948
	isoform_139471
	isoform_140444
	isoform_140761
	isoform_141389
	isoform_141994
	isoform_142036
	isoform_143716
	isoform_145052
	isoform_145643
	isoform_146173
	isoform_147126
	isoform_148010
	isoform_148109
	isoform_148746
	isoform_149778
	isoform_150813
	isoform_150930
	isoform_151112
	isoform_151142
	isoform_153017
	isoform_153351
	isoform_154125
	isoform_155260
	isoform_157315
	isoform_157960
	isoform_157991
	isoform_158959
	isoform_159293
	isoform_159570
	isoform_159638
	isoform_159976
	isoform_159989
	isoform_160726
	isoform_161059
	isoform_161211
	isoform_161357
	isoform_162632
	isoform_162817
	isoform_163670
	isoform_163942
	isoform_165069
	isoform_165254
	isoform_166983
	isoform_167403
	isoform_167993
	isoform_168825
	isoform_169269
	isoform_169279
	isoform_169313
	isoform_169360
	isoform_170300
	isoform_170520
	isoform_170831
	isoform_171626
	isoform_171953
	isoform_172220
	isoform_172564
	isoform_172810
	isoform_172993
	isoform_173087
	isoform_173130
	isoform_173973
	isoform_175225
	isoform_176277
	isoform_176713
	isoform_177867
	isoform_177905
	isoform_178304
	isoform_180203
	isoform_180500
	isoform_181015
	isoform_181290
	isoform_181427
	isoform_181679
	isoform_183205
	isoform_183618
	isoform_10005
	isoform_10253
	isoform_10391
	isoform_10402
	isoform_10461
	isoform_10554
	isoform_10803
	isoform_10916
	isoform_10944
	isoform_11300
	isoform_11549
	isoform_11657
	isoform_11661
	isoform_11671
	isoform_11850
	isoform_11903
	isoform_12205
	isoform_12298
	isoform_12820
	isoform_12856
	isoform_13148
	isoform_13376
	isoform_13390
	isoform_13501
	isoform_1034
	isoform_14260
	isoform_14325
	isoform_1112
	isoform_15017
	isoform_15124
	isoform_16452
	isoform_16606
	isoform_16864
	isoform_17114
	isoform_17299
	isoform_17469
	isoform_17507
	isoform_17597
	isoform_17683
	isoform_17696
	isoform_18304
	isoform_1487
	isoform_1661
	isoform_1699
	isoform_1798
	isoform_185129
	isoform_185167
	isoform_185306
	isoform_186356
[truncated: 3,751 more rows]
