# Supplementary material for: Full-length transcriptome analysis of Adiantum flabellulatum gametophyte
Source: PeerJ. 2022 Mar 9;10:e13079. doi: 10.7717/peerj.13079 (PMC8917799; doi:10.7717/peerj.13079)
Supplement: Supplemental Information 8 [file peerj-10-13079-s008.xlsx]

## Sheet: Table.S7
Table S8 2 214 TRs were predicted by itak website
Family	ID
ARID	isoform_136235
	isoform_137064
	isoform_138925
	isoform_151214
	isoform_151777
	isoform_155434
	isoform_158206
	isoform_159117
	isoform_166108
	isoform_11171
	isoform_11745
	isoform_12963
	isoform_14295
	isoform_14984
	isoform_15706
	isoform_16280
	isoform_16845
	isoform_17370
	isoform_18037
	isoform_18152
	isoform_18209
	isoform_1791
	isoform_183963
	isoform_185514
	isoform_190109
	isoform_194685
	isoform_205522
	isoform_206438
	isoform_208791
	isoform_212723
	isoform_217011
	isoform_217905
	isoform_221399
	isoform_227609
	isoform_231830
	isoform_233917
	isoform_234179
	isoform_235095
	isoform_241504
	isoform_251811
	isoform_252419
	isoform_253484
	isoform_18476
	isoform_18635
	isoform_19198
	isoform_20259
	isoform_22023
	isoform_23057
	isoform_24225
	isoform_25204
	isoform_1882
	isoform_2257
	isoform_2379
	isoform_257644
	isoform_259903
	isoform_261105
	isoform_267439
	isoform_268444
	isoform_269371
	isoform_276777
	isoform_281455
	isoform_282632
	isoform_284690
	isoform_287715
	isoform_290605
	isoform_291984
	isoform_293549
	isoform_293905
	isoform_294393
	isoform_299823
	isoform_304122
	isoform_307729
	isoform_313839
	isoform_25665
	isoform_28157
	isoform_28580
	isoform_29783
	isoform_57141
	isoform_6084
	isoform_6320
	isoform_326905
	isoform_331399
	isoform_332129
	isoform_335074
	isoform_338815
	isoform_344055
	isoform_347441
	isoform_36463
	isoform_69115
	isoform_6638
	isoform_7570
	isoform_7655
	isoform_8405
	isoform_9138
	isoform_9929
AUX/IAA	isoform_100443
	isoform_103684
	isoform_112131
	isoform_134700
	isoform_137537
	isoform_137793
	isoform_139559
	isoform_143609
	isoform_144043
	isoform_144168
	isoform_144809
	isoform_148876
	isoform_149679
	isoform_149764
	isoform_151928
	isoform_154566
	isoform_160875
	isoform_164209
	isoform_166792
	isoform_167554
	isoform_168261
	isoform_172395
	isoform_177751
	isoform_10239
	isoform_10894
	isoform_11103
	isoform_11790
	isoform_11865
	isoform_12015
	isoform_13152
	isoform_13526
	isoform_13979
	isoform_13992
	isoform_14003
	isoform_14720
	isoform_15252
	isoform_15380
	isoform_15514
	isoform_15547
	isoform_16221
	isoform_16907
	isoform_17201
	isoform_17385
	isoform_17650
	isoform_17651
	isoform_18146
	isoform_18166
	isoform_184861
	isoform_186500
	isoform_186593
	isoform_191411
	isoform_192955
	isoform_193235
	isoform_195648
	isoform_197711
	isoform_199908
	isoform_202742
	isoform_204113
	isoform_207221
	isoform_208175
	isoform_208488
	isoform_213092
	isoform_214713
	isoform_216482
	isoform_219961
	isoform_220461
	isoform_223251
	isoform_225024
	isoform_227158
	isoform_228465
	isoform_228501
	isoform_234174
	isoform_236445
	isoform_236922
	isoform_236995
	isoform_239081
	isoform_243120
	isoform_244109
	isoform_246387
	isoform_250241
	isoform_250899
	isoform_18462
	isoform_18558
	isoform_19014
	isoform_19416
	isoform_20231
	isoform_20821
	isoform_21525
	isoform_22393
	isoform_22798
	isoform_23027
	isoform_24455
	isoform_24801
	isoform_254731
	isoform_255518
	isoform_262695
	isoform_262696
	isoform_262892
	isoform_263232
	isoform_270334
	isoform_270500
	isoform_271380
	isoform_278670
	isoform_279666
	isoform_280576
	isoform_281432
	isoform_281639
	isoform_282220
	isoform_283332
	isoform_284525
	isoform_286031
	isoform_287170
	isoform_287439
	isoform_289775
	isoform_298942
	isoform_299803
	isoform_304891
	isoform_309782
	isoform_310431
	isoform_312420
	isoform_319726
	isoform_320235
	isoform_321113
	isoform_322886
	isoform_25718
	isoform_26088
	isoform_26504
	isoform_26509
	isoform_28758
	isoform_29268
	isoform_29726
	isoform_29947
	isoform_30039
	isoform_30057
	isoform_31318
	isoform_52889
	isoform_57067
	isoform_57225
	isoform_57519
	isoform_58835
	isoform_59442
	isoform_59677
	isoform_60378
	isoform_62265
	isoform_329062
	isoform_332049
	isoform_335868
	isoform_336682
	isoform_340386
	isoform_342329
	isoform_344238
	isoform_345879
	isoform_349251
	isoform_349633
	isoform_351348
	isoform_351702
	isoform_353225
	isoform_34042
	isoform_35417
	isoform_38277
	isoform_38312
	isoform_40437
	isoform_41415
	isoform_43658
	isoform_45808
	isoform_46781
	isoform_64732
	isoform_64764
	isoform_65666
	isoform_65952
	isoform_67722
	isoform_71498
	isoform_71651
	isoform_72412
	isoform_73525
	isoform_73612
	isoform_74546
	isoform_83047
	isoform_84582
	isoform_98645
	isoform_7093
	isoform_7135
	isoform_8491
Coactivator p15	isoform_100597
	isoform_100625
	isoform_103928
	isoform_109449
	isoform_198647
	isoform_218089
	isoform_268600
	isoform_287741
	isoform_298048
	isoform_331111
	isoform_70198
	isoform_71449
	isoform_72240
	isoform_84041
	isoform_89291
	isoform_92690
	isoform_94736
GNAT	isoform_102559
	isoform_104021
	isoform_104302
	isoform_105381
	isoform_105456
	isoform_105595
	isoform_105926
	isoform_107584
	isoform_107704
	isoform_109479
	isoform_114535
	isoform_114882
	isoform_120136
	isoform_120290
	isoform_121900
	isoform_123948
	isoform_124865
	isoform_126781
	isoform_127254
	isoform_128524
	isoform_134122
	isoform_134712
	isoform_143368
	isoform_145478
	isoform_147120
	isoform_149070
	isoform_149628
	isoform_149658
	isoform_153043
	isoform_154153
	isoform_157367
	isoform_157869
	isoform_158467
	isoform_163597
	isoform_164058
	isoform_164752
	isoform_164760
	isoform_166310
	isoform_167926
	isoform_170102
	isoform_170488
	isoform_170716
	isoform_172333
	isoform_175415
	isoform_176363
	isoform_178889
	isoform_180272
	isoform_180588
	isoform_182575
	isoform_183293
	isoform_10808
	isoform_11469
	isoform_14013
	isoform_14669
	isoform_16724
	isoform_185197
	isoform_186089
	isoform_189409
	isoform_189517
	isoform_192080
	isoform_193286
	isoform_199578
	isoform_203271
	isoform_203290
	isoform_203365
	isoform_205699
	isoform_206270
	isoform_206526
	isoform_207081
	isoform_208793
	isoform_209023
	isoform_209754
	isoform_210208
	isoform_210328
	isoform_210617
	isoform_212019
	isoform_214027
	isoform_214882
	isoform_216565
	isoform_218543
	isoform_222244
	isoform_222308
	isoform_223441
	isoform_223850
	isoform_226723
	isoform_228914
	isoform_230201
	isoform_231047
	isoform_233204
	isoform_242202
	isoform_244004
	isoform_244613
	isoform_246650
	isoform_248151
	isoform_248454
	isoform_249416
	isoform_249652
	isoform_252593
	isoform_253090
	isoform_253755
	isoform_20495
	isoform_23821
	isoform_24262
	isoform_255109
	isoform_256258
	isoform_256433
	isoform_257408
	isoform_259032
	isoform_261446
	isoform_261573
	isoform_264768
	isoform_265268
	isoform_274282
	isoform_275181
	isoform_276675
	isoform_277094
	isoform_280843
	isoform_280893
	isoform_282753
	isoform_283284
	isoform_293575
	isoform_301516
	isoform_306864
	isoform_311491
	isoform_312397
	isoform_314033
	isoform_314731
	isoform_317782
	isoform_317815
	isoform_318054
	isoform_319557
	isoform_26007
	isoform_27533
	isoform_29871
	isoform_31676
	isoform_32160
	isoform_51348
	isoform_51924
	isoform_52203
	isoform_53186
	isoform_53440
	isoform_54818
	isoform_55338
	isoform_55885
	isoform_56476
	isoform_57946
	isoform_58806
	isoform_59053
	isoform_59335
	isoform_60128
	isoform_61209
	isoform_62465
	isoform_63739
	isoform_325040
	isoform_327424
	isoform_327872
	isoform_328199
	isoform_329395
	isoform_330541
	isoform_331105
	isoform_334174
	isoform_335077
	isoform_336620
	isoform_342039
	isoform_346364
	isoform_348786
	isoform_350029
	isoform_351306
	isoform_351699
	isoform_351984
	isoform_33919
	isoform_36591
	isoform_38124
	isoform_38676
	isoform_39453
	isoform_39475
	isoform_40903
	isoform_41697
	isoform_42736
	isoform_43105
	isoform_44039
	isoform_44431
	isoform_46220
	isoform_47228
	isoform_48934
	isoform_64632
	isoform_64789
	isoform_64907
	isoform_65632
	isoform_66904
	isoform_68034
	isoform_68862
	isoform_70073
	isoform_70454
	isoform_70821
	isoform_70887
	isoform_71664
	isoform_72179
	isoform_72729
	isoform_72777
	isoform_72846
	isoform_73311
	isoform_73407
	isoform_73911
	isoform_75443
	isoform_76498
	isoform_77258
	isoform_78196
	isoform_78498
	isoform_79012
	isoform_79471
	isoform_79686
	isoform_79793
	isoform_80347
	isoform_80419
	isoform_81315
	isoform_83550
	isoform_83560
	isoform_84197
	isoform_84918
	isoform_85284
	isoform_85538
	isoform_86438
	isoform_86510
	isoform_86578
	isoform_86644
	isoform_87093
	isoform_87251
	isoform_88175
	isoform_88846
	isoform_88868
	isoform_89123
	isoform_90166
	isoform_90629
	isoform_91161
	isoform_91751
	isoform_92520
	isoform_92980
	isoform_93056
	isoform_93954
	isoform_94035
	isoform_94976
	isoform_96078
	isoform_96655
	isoform_97493
	isoform_98099
	isoform_99513
	isoform_9795
HMG	isoform_101340
	isoform_112844
	isoform_136232
	isoform_10637
	isoform_11784
	isoform_15131
	isoform_1627
	isoform_190879
	isoform_193565
	isoform_198675
	isoform_202933
	isoform_210041
	isoform_211097
	isoform_211326
	isoform_223897
	isoform_228158
	isoform_233490
	isoform_239065
	isoform_242155
	isoform_253576
	isoform_256942
	isoform_257917
	isoform_264558
	isoform_264763
	isoform_275197
	isoform_278537
	isoform_280341
	isoform_282428
	isoform_283208
	isoform_284473
	isoform_285759
	isoform_286200
	isoform_292505
	isoform_298311
	isoform_304116
	isoform_305366
	isoform_315876
	isoform_317880
	isoform_323944
	isoform_325260
	isoform_329886
	isoform_333066
	isoform_344692
	isoform_42379
	isoform_66354
	isoform_70191
	isoform_70443
	isoform_72624
	isoform_76370
	isoform_77358
	isoform_78374
	isoform_78759
	isoform_78815
	isoform_80092
	isoform_82803
	isoform_83790
	isoform_84394
	isoform_84901
	isoform_85338
	isoform_87468
	isoform_88036
	isoform_89096
	isoform_90640
	isoform_90898
	isoform_91080
	isoform_96977
	isoform_97293
	isoform_98250
IWS1	isoform_134847
	isoform_146334
	isoform_152845
	isoform_156376
	isoform_164498
	isoform_165101
	isoform_175858
	isoform_181305
	isoform_10225
	isoform_11019
	isoform_11539
	isoform_12224
	isoform_12426
	isoform_13060
	isoform_13633
	isoform_13927
	isoform_14077
	isoform_15063
	isoform_15659
	isoform_16640
	isoform_16680
	isoform_16695
	isoform_16733
	isoform_17662
	isoform_17665
	isoform_18125
	isoform_190228
	isoform_194835
	isoform_196144
	isoform_214859
	isoform_222671
	isoform_228074
	isoform_228506
	isoform_232135
	isoform_239940
	isoform_240463
	isoform_242709
	isoform_244174
	isoform_247208
	isoform_248061
	isoform_250262
	isoform_22773
	isoform_23933
	isoform_256120
	isoform_259775
	isoform_263662
	isoform_268865
	isoform_269169
	isoform_285681
	isoform_294863
	isoform_295194
	isoform_299911
	isoform_303599
	isoform_303963
	isoform_307644
	isoform_312587
	isoform_314384
	isoform_314835
	isoform_322099
	isoform_26244
	isoform_26262
	isoform_26644
	isoform_30772
	isoform_31657
	isoform_31743
	isoform_51048
	isoform_51979
	isoform_59623
	isoform_325103
	isoform_325265
	isoform_325478
	isoform_325709
	isoform_331916
	isoform_332478
	isoform_332805
	isoform_336607
	isoform_338972
	isoform_343804
	isoform_345050
	isoform_347010
	isoform_350376
	isoform_353228
	isoform_35415
	isoform_35711
	isoform_36287
	isoform_41090
	isoform_45834
	isoform_45996
	isoform_66089
	isoform_66153
	isoform_75425
	isoform_7038
	isoform_7186
	isoform_8096
	isoform_8195
	isoform_8288
	isoform_8993
	isoform_9865
Jumonji	isoform_140104
	isoform_148812
	isoform_155024
	isoform_156059
	isoform_168931
	isoform_182494
	isoform_16053
	isoform_185770
	isoform_191488
	isoform_194115
	isoform_197793
	isoform_201212
	isoform_202273
	isoform_203621
	isoform_204541
	isoform_211216
	isoform_218469
	isoform_222377
	isoform_226214
	isoform_226538
	isoform_232649
	isoform_240697
	isoform_20985
	isoform_21679
	isoform_21955
	isoform_23102
	isoform_23825
	isoform_2037
	isoform_258278
	isoform_271269
	isoform_275257
	isoform_279809
	isoform_291198
	isoform_296966
	isoform_297833
	isoform_302837
	isoform_304130
	isoform_304792
	isoform_307065
	isoform_311789
	isoform_312763
	isoform_316967
	isoform_318338
	isoform_322942
	isoform_54558
	isoform_55931
	isoform_56216
	isoform_57957
	isoform_60346
	isoform_42
	isoform_332057
	isoform_333677
	isoform_334842
	isoform_343721
	isoform_349549
	isoform_353125
	isoform_35575
	isoform_44544
	isoform_45828
	isoform_48598
	isoform_65260
	isoform_930
	isoform_952
LUG	isoform_155167
	isoform_174383
	isoform_1509
	isoform_1667
	isoform_1685
	isoform_215492
	isoform_254626
	isoform_327051
MBF1	isoform_100274
	isoform_101722
	isoform_105339
	isoform_108609
	isoform_110268
	isoform_117408
	isoform_126926
	isoform_145380
	isoform_176907
	isoform_228706
	isoform_228928
	isoform_244935
	isoform_276878
	isoform_77479
	isoform_79963
	isoform_82964
	isoform_83835
	isoform_84569
	isoform_84833
	isoform_86326
	isoform_86801
	isoform_93007
	isoform_96481
	isoform_98661
MED6	isoform_147867
	isoform_210926
	isoform_239258
	isoform_288857
	isoform_83449
MED7	isoform_242054
	isoform_87694
	isoform_92604
	isoform_99116
mTERF	isoform_115918
	isoform_119351
	isoform_133081
	isoform_133199
	isoform_133610
	isoform_134766
	isoform_140222
	isoform_140882
	isoform_141620
	isoform_143573
	isoform_147428
	isoform_148020
	isoform_149315
	isoform_151665
	isoform_154457
	isoform_157504
	isoform_158369
	isoform_160932
	isoform_162198
	isoform_163040
	isoform_164998
	isoform_165808
	isoform_171254
	isoform_171933
	isoform_172028
	isoform_173262
	isoform_173544
	isoform_175177
	isoform_176464
	isoform_177794
	isoform_178102
	isoform_182167
	isoform_10046
	isoform_10713
	isoform_13524
	isoform_13994
	isoform_17698
	isoform_17802
	isoform_185420
	isoform_188492
	isoform_188665
	isoform_188824
	isoform_192839
	isoform_193136
	isoform_199857
	isoform_208030
	isoform_209286
	isoform_209560
	isoform_212980
	isoform_213378
	isoform_218664
	isoform_221442
	isoform_222780
	isoform_223663
	isoform_224408
	isoform_226205
	isoform_226576
	isoform_228963
	isoform_231571
	isoform_235084
	isoform_236170
	isoform_240354
	isoform_242086
	isoform_243537
	isoform_243620
	isoform_244934
	isoform_248597
	isoform_249194
	isoform_250846
	isoform_252244
	isoform_18793
	isoform_19420
	isoform_19607
	isoform_20012
	isoform_20503
	isoform_20661
	isoform_20996
	isoform_21860
	isoform_22140
	isoform_22562
	isoform_22793
	isoform_23373
	isoform_23434
	isoform_23754
	isoform_24246
	isoform_24462
	isoform_25260
	isoform_255551
	isoform_257511
	isoform_257563
	isoform_257601
	isoform_265505
	isoform_265695
	isoform_269391
	isoform_271926
	isoform_272301
	isoform_273833
	isoform_277758
	isoform_280917
	isoform_281119
	isoform_281628
	isoform_281630
	isoform_282320
	isoform_286476
	isoform_287115
	isoform_292160
	isoform_294402
	isoform_295947
	isoform_296791
	isoform_297150
	isoform_297584
	isoform_300524
	isoform_302414
	isoform_306259
	isoform_307757
	isoform_307921
	isoform_311505
	isoform_312580
	isoform_320097
	isoform_321168
	isoform_323948
	isoform_323975
	isoform_324271
	isoform_26745
	isoform_27711
	isoform_28522
	isoform_29274
	isoform_29510
	isoform_29992
	isoform_3003
	isoform_50888
	isoform_51193
	isoform_51907
	isoform_3632
	isoform_58148
	isoform_61767
	isoform_4250
	isoform_4674
	isoform_4780
	isoform_4823
	isoform_5427
	isoform_5573
	isoform_326828
	isoform_327257
	isoform_329324
	isoform_331945
	isoform_332325
	isoform_334203
	isoform_334307
	isoform_334936
	isoform_340015
	isoform_340051
	isoform_341841
	isoform_347858
	isoform_350725
	isoform_354053
	isoform_32717
	isoform_38219
	isoform_43473
	isoform_43895
	isoform_47623
	isoform_49299
	isoform_49600
	isoform_50012
	isoform_64968
	isoform_65523
	isoform_67670
	isoform_74642
	isoform_81405
	isoform_83065
	isoform_83350
	isoform_84298
	isoform_91611
	isoform_91841
	isoform_95839
	isoform_96626
	isoform_6478
	isoform_7670
	isoform_8273
	isoform_8631
	isoform_8788
	isoform_8972
Others	isoform_100018
	isoform_103427
	isoform_105245
	isoform_106074
	isoform_106642
	isoform_108806
	isoform_110407
	isoform_115144
	isoform_115231
	isoform_133941
	isoform_134022
	isoform_134911
	isoform_135077
	isoform_136147
	isoform_136355
	isoform_136376
	isoform_136957
	isoform_137888
	isoform_139800
	isoform_140719
	isoform_141589
	isoform_143012
	isoform_143744
	isoform_143818
	isoform_143865
	isoform_144348
	isoform_144355
	isoform_147659
	isoform_148413
	isoform_149945
	isoform_151157
	isoform_151915
	isoform_154357
	isoform_158765
	isoform_158776
	isoform_159173
	isoform_159238
	isoform_160267
	isoform_161493
	isoform_162103
	isoform_162115
	isoform_163566
	isoform_164692
	isoform_166003
	isoform_170509
	isoform_170788
	isoform_171260
	isoform_172805
	isoform_175385
	isoform_176221
	isoform_176246
	isoform_177452
	isoform_177726
	isoform_178077
	isoform_181484
	isoform_182136
	isoform_183146
	isoform_10448
	isoform_10454
	isoform_12887
	isoform_1026
	isoform_13831
	isoform_1074
	isoform_1110
	isoform_14860
	isoform_15214
	isoform_15488
	isoform_15749
	isoform_17326
	isoform_1308
	isoform_17408
	isoform_17426
	isoform_17460
	isoform_17766
	isoform_18281
	isoform_1442
	isoform_1491
	isoform_1558
	isoform_1669
	isoform_1809
	isoform_1819
	isoform_185245
	isoform_185903
	isoform_186397
	isoform_186443
	isoform_186693
	isoform_187580
	isoform_188503
	isoform_189271
	isoform_191991
	isoform_193395
	isoform_193571
	isoform_195230
	isoform_196300
	isoform_197048
	isoform_197334
	isoform_200994
	isoform_202010
	isoform_202579
	isoform_203166
	isoform_204618
	isoform_205555
	isoform_206114
	isoform_206506
	isoform_207133
	isoform_209065
	isoform_209492
	isoform_209670
	isoform_210079
	isoform_210633
	isoform_211060
	isoform_211584
	isoform_213554
	isoform_214576
	isoform_214736
	isoform_214898
	isoform_216440
	isoform_216807
	isoform_217049
	isoform_218355
	isoform_219078
	isoform_219086
	isoform_219111
	isoform_220360
	isoform_221133
	isoform_221158
	isoform_221868
	isoform_221929
	isoform_222416
	isoform_222557
	isoform_222660
	isoform_222901
	isoform_222936
	isoform_223619
	isoform_224606
	isoform_227409
	isoform_228114
	isoform_229685
	isoform_230159
	isoform_230318
	isoform_231333
	isoform_233833
	isoform_234162
	isoform_236708
	isoform_237162
	isoform_237432
	isoform_237485
	isoform_237865
	isoform_240141
	isoform_241943
	isoform_242395
	isoform_244403
	isoform_245087
	isoform_245554
	isoform_245791
	isoform_246021
	isoform_246036
	isoform_246919
	isoform_247606
	isoform_248653
	isoform_249682
	isoform_250279
	isoform_251126
	isoform_251410
	isoform_251611
	isoform_251950
	isoform_252480
	isoform_18551
	isoform_18578
	isoform_18689
	isoform_18933
	isoform_19328
	isoform_19817
	isoform_19824
	isoform_20239
	isoform_21091
	isoform_21430
	isoform_21532
	isoform_21749
	isoform_21864
	isoform_21995
	isoform_22547
	isoform_22770
	isoform_22794
	isoform_24146
	isoform_24219
	isoform_24861
	isoform_25232
	isoform_1937
	isoform_2054
	isoform_2510
	isoform_2520
	isoform_255089
	isoform_255222
	isoform_256039
	isoform_256551
	isoform_257375
	isoform_262005
	isoform_262361
	isoform_263248
	isoform_264140
	isoform_265439
	isoform_266061
	isoform_266461
	isoform_267535
	isoform_267587
	isoform_267801
	isoform_268181
	isoform_268755
	isoform_270566
	isoform_270593
	isoform_271764
	isoform_272014
	isoform_275866
	isoform_276526
	isoform_277885
	isoform_278292
	isoform_278303
	isoform_278716
	isoform_279111
	isoform_279907
	isoform_280268
	isoform_281042
	isoform_281563
	isoform_281734
	isoform_282474
	isoform_286088
	isoform_286834
	isoform_289430
	isoform_289612
	isoform_290168
	isoform_290768
	isoform_290802
	isoform_291039
	isoform_294349
	isoform_294651
	isoform_294661
	isoform_295171
	isoform_295522
	isoform_295641
	isoform_295721
	isoform_295763
	isoform_297799
	isoform_298268
	isoform_299442
	isoform_299536
	isoform_301727
	isoform_302806
	isoform_303065
	isoform_303068
	isoform_304386
	isoform_304464
	isoform_305526
	isoform_305837
	isoform_306887
	isoform_309425
	isoform_310632
	isoform_311090
	isoform_312376
	isoform_313441
	isoform_314073
	isoform_314670
	isoform_317238
	isoform_317783
	isoform_322361
	isoform_322569
	isoform_322681
	isoform_323409
	isoform_323866
	isoform_25586
	isoform_25986
	isoform_27337
	isoform_27588
	isoform_28429
	isoform_29085
	isoform_30831
	isoform_31539
	isoform_32218
	isoform_2725
	isoform_2773
	isoform_3093
	isoform_51162
	isoform_3445
	isoform_52086
	isoform_52290
	isoform_54089
	isoform_54548
	isoform_54576
	isoform_56828
	isoform_57219
	isoform_57648
	isoform_57749
	isoform_58255
	isoform_60544
	isoform_62042
	isoform_62402
	isoform_63609
	isoform_5244
	isoform_495
	isoform_325777
	isoform_327337
	isoform_327613
	isoform_328583
	isoform_328861
	isoform_329014
	isoform_329756
	isoform_330290
	isoform_330502
	isoform_330888
	isoform_331074
	isoform_331835
	isoform_332502
	isoform_334680
	isoform_335369
	isoform_336390
	isoform_336630
	isoform_337552
	isoform_337787
	isoform_338053
	isoform_341936
	isoform_342263
	isoform_342743
	isoform_345920
	isoform_346215
	isoform_346903
	isoform_347507
	isoform_348762
	isoform_348892
	isoform_350937
	isoform_351300
	isoform_351553
	isoform_352014
	isoform_352066
	isoform_352704
	isoform_353302
	isoform_353789
	isoform_33155
	isoform_33544
	isoform_34650
	isoform_38163
	isoform_38606
	isoform_40952
	isoform_43386
	isoform_43610
	isoform_43712
	isoform_44637
	isoform_47043
	isoform_48128
	isoform_48993
	isoform_49482
	isoform_64415
	isoform_66826
	isoform_69097
	isoform_69431
	isoform_70780
	isoform_75297
	isoform_75870
	isoform_76990
	isoform_77182
	isoform_77262
	isoform_78470
	isoform_82236
	isoform_83114
	isoform_85460
	isoform_86987
	isoform_89554
	isoform_91043
	isoform_91591
	isoform_92692
	isoform_93685
	isoform_94655
	isoform_96416
	isoform_96484
	isoform_97140
	isoform_6640
	isoform_7205
	isoform_9080
	isoform_904
PHD	isoform_133079
	isoform_135613
	isoform_138454
	isoform_142305
	isoform_145803
	isoform_146781
	isoform_147662
	isoform_149388
	isoform_149944
	isoform_152797
	isoform_154933
	isoform_158241
	isoform_160613
	isoform_161665
	isoform_162133
	isoform_162237
	isoform_163139
	isoform_167568
	isoform_168164
	isoform_168854
	isoform_170114
	isoform_170536
	isoform_170705
	isoform_172911
	isoform_173274
	isoform_174130
	isoform_175343
	isoform_175581
	isoform_177339
	isoform_177494
	isoform_178093
	isoform_178268
	isoform_178497
	isoform_178944
	isoform_180930
	isoform_182522
	isoform_182573
	isoform_10361
	isoform_11168
	isoform_11572
	isoform_16
	isoform_192032
	isoform_192140
	isoform_203497
	isoform_209260
	isoform_211863
	isoform_214389
	isoform_217308
	isoform_217643
	isoform_218794
	isoform_219793
	isoform_222791
	isoform_225791
	isoform_227844
	isoform_232210
	isoform_232852
	isoform_233990
	isoform_234873
	isoform_235707
	isoform_238581
	isoform_240856
	isoform_240900
	isoform_244211
	isoform_244913
	isoform_251093
	isoform_252068
	isoform_18614
	isoform_18717
	isoform_19478
	isoform_22955
	isoform_23547
	isoform_24078
	isoform_254414
	isoform_255016
	isoform_258091
	isoform_260886
	isoform_261085
	isoform_263350
	isoform_265491
	isoform_268141
	isoform_269019
	isoform_270180
	isoform_274007
	isoform_274290
	isoform_275226
	isoform_277868
	isoform_278619
	isoform_278750
	isoform_279715
	isoform_284474
	isoform_285493
	isoform_285586
	isoform_288174
	isoform_292010
	isoform_299743
	isoform_306676
	isoform_307265
	isoform_307606
	isoform_307688
	isoform_307872
	isoform_308658
	isoform_308975
	isoform_311523
	isoform_314297
	isoform_314587
	isoform_316153
	isoform_316941
	isoform_321214
	isoform_323174
	isoform_323439
	isoform_27985
	isoform_29843
	isoform_30897
	isoform_2731
	isoform_50415
	isoform_52115
	isoform_52292
	isoform_52422
	isoform_3564
	isoform_53745
	isoform_56055
	isoform_57269
	isoform_58506
	isoform_58647
	isoform_61675
	isoform_62746
	isoform_63029
	isoform_5390
	isoform_5432
	isoform_5436
	isoform_5490
	isoform_6062
	isoform_6401
	isoform_325078
	isoform_328495
	isoform_328568
	isoform_330108
	isoform_331973
	isoform_334865
	isoform_335664
	isoform_337164
	isoform_338401
	isoform_351034
	isoform_34549
	isoform_36097
	isoform_36652
	isoform_39484
	isoform_41087
	isoform_44617
	isoform_45853
	isoform_46425
	isoform_47192
	isoform_47261
	isoform_48422
	isoform_48956
	isoform_49494
	isoform_64099
	isoform_65014
	isoform_65377
	isoform_65874
	isoform_99307
	isoform_6469
	isoform_7118
	isoform_7439
	isoform_7603
	isoform_8863
	isoform_9407
Pseudo ARR-B	isoform_170703
	isoform_15810
	isoform_16558
	isoform_184155
	isoform_2505
	isoform_290463
	isoform_318359
	isoform_2829
	isoform_4097
RB	isoform_140830
	isoform_194645
	isoform_307436
	isoform_475
Rcd1-like	isoform_101766
	isoform_144773
	isoform_152414
	isoform_152521
	isoform_183878
	isoform_205392
	isoform_220720
	isoform_254407
	isoform_39968
	isoform_43825
SET	isoform_133971
	isoform_136490
	isoform_139837
	isoform_140778
	isoform_141808
	isoform_147993
	isoform_148140
	isoform_148308
	isoform_149220
	isoform_153547
	isoform_154711
	isoform_155467
	isoform_156670
	isoform_156795
	isoform_157477
	isoform_159640
	isoform_162597
	isoform_165236
	isoform_166234
	isoform_168586
	isoform_169180
	isoform_172694
	isoform_173898
	isoform_174420
	isoform_174581
	isoform_174937
	isoform_176582
	isoform_176933
	isoform_177425
	isoform_177973
	isoform_179221
	isoform_181523
	isoform_181813
	isoform_182020
	isoform_182029
	isoform_182348
	isoform_182442
	isoform_182583
	isoform_182824
	isoform_183761
	isoform_11038
	isoform_11266
	isoform_11707
	isoform_12113
	isoform_12326
	isoform_12631
	isoform_12780
	isoform_13675
	isoform_14265
	isoform_14450
	isoform_15140
	isoform_15173
	isoform_15261
	isoform_15268
	isoform_15388
	isoform_15731
	isoform_17147
	isoform_17327
	isoform_17371
	isoform_17714
	isoform_177
	isoform_25
	isoform_184132
	isoform_184191
	isoform_184514
	isoform_186026
	isoform_186186
	isoform_186911
	isoform_187472
	isoform_188238
	isoform_189639
	isoform_189904
	isoform_189910
	isoform_191998
	isoform_192518
	isoform_193919
	isoform_196552
	isoform_200772
	isoform_206810
	isoform_209102
	isoform_210572
	isoform_211752
	isoform_211937
	isoform_213786
	isoform_216345
	isoform_217748
	isoform_218665
	isoform_219164
	isoform_221162
	isoform_222375
	isoform_222527
	isoform_229055
	isoform_229786
	isoform_231269
	isoform_231851
	isoform_233574
	isoform_233865
	isoform_234453
	isoform_236180
	isoform_238190
	isoform_238927
	isoform_240968
	isoform_241617
	isoform_242018
	isoform_242333
	isoform_242767
	isoform_243112
	isoform_244329
	isoform_246148
	isoform_249367
	isoform_249946
	isoform_251830
	isoform_18697
	isoform_18738
	isoform_19921
	isoform_20872
	isoform_23170
	isoform_23387
	isoform_23468
	isoform_24295
	isoform_24346
	isoform_24378
	isoform_24423
	isoform_25032
	isoform_211
	isoform_254791
	isoform_257185
	isoform_258314
	isoform_259069
	isoform_260741
	isoform_261165
	isoform_261792
	isoform_262421
	isoform_267101
	isoform_268417
	isoform_273884
	isoform_274092
	isoform_274202
	isoform_277234
	isoform_277981
	isoform_279847
	isoform_281637
	isoform_282587
	isoform_282640
	isoform_283498
	isoform_283679
	isoform_284202
	isoform_284267
	isoform_288520
	isoform_289776
	isoform_289892
	isoform_291294
	isoform_293801
	isoform_295660
	isoform_295747
	isoform_295770
	isoform_296077
	isoform_298118
	isoform_298444
	isoform_300074
	isoform_300094
	isoform_302978
	isoform_303031
	isoform_306987
	isoform_307128
	isoform_310675
	isoform_310791
	isoform_311639
	isoform_313293
	isoform_313548
	isoform_314952
	isoform_315391
	isoform_315974
	isoform_316471
	isoform_318121
	isoform_319029
	isoform_319295
	isoform_319977
	isoform_322123
	isoform_322319
	isoform_322413
	isoform_323229
	isoform_323728
	isoform_25633
	isoform_26048
	isoform_26518
	isoform_27322
	isoform_28178
	isoform_28568
	isoform_31442
	isoform_3085
	isoform_3540
	isoform_3553
	isoform_59890
	isoform_3989
	isoform_61362
	isoform_4684
	isoform_4755
	isoform_4945
	isoform_5143
	isoform_416
	isoform_5322
	isoform_5386
	isoform_5439
	isoform_5481
	isoform_446
	isoform_6032
	isoform_6221
	isoform_6240
	isoform_47
	isoform_326123
	isoform_326211
	isoform_327531
	isoform_331227
	isoform_331636
	isoform_332479
	isoform_332920
	isoform_334964
	isoform_339254
	isoform_340406
	isoform_341585
	isoform_342861
	isoform_343543
	isoform_345910
	isoform_348081
	isoform_348330
	isoform_348994
	isoform_349617
	isoform_350693
	isoform_350714
	isoform_352971
	isoform_32465
	isoform_32528
	isoform_32638
	isoform_35615
	isoform_37968
	isoform_41069
	isoform_42943
	isoform_47962
	isoform_48326
	isoform_67767
	isoform_74679
	isoform_94067
	isoform_6667
	isoform_6840
	isoform_7082
	isoform_7225
	isoform_7697
	isoform_8320
	isoform_9259
	isoform_9766
SNF2	isoform_135637
	isoform_137578
	isoform_139551
	isoform_140006
	isoform_141711
	isoform_143847
	isoform_147772
	isoform_151501
	isoform_159067
	isoform_174975
	isoform_175925
	isoform_13280
	isoform_1028
	isoform_1140
	isoform_1156
	isoform_1250
	isoform_1266
	isoform_16871
	isoform_1376
	isoform_183851
	isoform_184929
	isoform_190403
	isoform_199943
	isoform_202048
	isoform_204436
	isoform_206180
	isoform_207088
	isoform_208667
	isoform_214571
	isoform_214849
	isoform_215720
	isoform_217128
	isoform_228091
	isoform_229078
	isoform_244725
	isoform_245235
	isoform_245236
	isoform_245474
	isoform_246436
	isoform_246439
	isoform_1919
	isoform_2049
	isoform_2067
	isoform_2130
	isoform_262492
	isoform_268747
	isoform_268859
	isoform_271096
	isoform_276032
	isoform_277921
	isoform_284594
	isoform_285776
	isoform_286308
	isoform_290248
	isoform_294439
	isoform_296356
	isoform_297212
	isoform_298637
	isoform_299234
	isoform_309313
	isoform_315254
	isoform_322261
	isoform_323401
	isoform_2763
	isoform_2779
	isoform_2955
	isoform_2963
	isoform_3643
	isoform_589
	isoform_629
	isoform_327245
	isoform_334113
	isoform_335300
	isoform_337337
	isoform_341033
	isoform_343277
	isoform_344245
	isoform_344946
	isoform_347480
	isoform_348476
	isoform_353204
	isoform_34754
	isoform_3315
	isoform_84393
	isoform_795
	isoform_86
	isoform_87
SOH1	isoform_171242
	isoform_243648
	isoform_75939
	isoform_79165
	isoform_86907
	isoform_89259
	isoform_90294
	isoform_99095
SWI/SNF-BAF60b	isoform_100345
	isoform_100512
	isoform_104033
	isoform_112379
	isoform_148808
	isoform_150217
	isoform_152255
	isoform_155583
	isoform_155768
	isoform_162636
	isoform_166988
	isoform_182331
	isoform_10677
	isoform_11863
	isoform_12397
	isoform_13532
	isoform_186701
	isoform_187596
	isoform_192438
	isoform_202763
	isoform_202862
	isoform_211027
	isoform_223102
	isoform_227340
	isoform_228618
	isoform_244340
	isoform_18754
	isoform_256712
	isoform_258743
	isoform_259118
	isoform_269610
	isoform_273545
	isoform_286466
	isoform_286467
	isoform_309284
	isoform_312592
	isoform_320364
	isoform_25460
	isoform_57735
	isoform_62800
	isoform_327871
	isoform_328645
	isoform_334011
	isoform_337583
	isoform_342433
	isoform_343864
	isoform_343972
	isoform_346370
	isoform_347829
	isoform_349676
	isoform_352079
	isoform_66706
	isoform_69007
	isoform_71852
	isoform_75209
	isoform_76534
	isoform_76893
	isoform_77645
	isoform_79223
	isoform_81798
	isoform_82907
	isoform_82927
	isoform_83088
	isoform_85175
	isoform_86121
	isoform_87657
	isoform_88306
	isoform_91673
	isoform_96330
	isoform_8
SWI/SNF-SWI3	isoform_183209
	isoform_205840
	isoform_2480
	isoform_277589
	isoform_281757
	isoform_321897
	isoform_324703
	isoform_327655
TAZ	isoform_160753
	isoform_165121
	isoform_180190
	isoform_11827
	isoform_15950
	isoform_192226
	isoform_193216
	isoform_195853
	isoform_212446
	isoform_217969
	isoform_236833
[truncated: 216 more rows]
