# Supplementary material for: Full-length transcriptome analysis of Adiantum flabellulatum gametophyte
Source: PeerJ. 2022 Mar 9;10:e13079. doi: 10.7717/peerj.13079 (PMC8917799; doi:10.7717/peerj.13079)
Supplement: Supplemental Information 9 [file peerj-10-13079-s009.xlsx]

## Sheet: Table.S8
Table S9 4 950 PKs were predicted by itak website
Family	ID
AGC_MAST	isoform_146344
	isoform_152213
	isoform_165049
	isoform_176537
	isoform_178178
	isoform_180703
	isoform_13
	isoform_197157
	isoform_202205
	isoform_213448
	isoform_227324
	isoform_233157
	isoform_250067
	isoform_255564
	isoform_262086
	isoform_315850
	isoform_4011
	isoform_330005
	isoform_340234
	isoform_347120
	isoform_92
AGC_NDR	isoform_135933
	isoform_144117
	isoform_153749
	isoform_155334
	isoform_160489
	isoform_161938
	isoform_170115
	isoform_170628
	isoform_12537
	isoform_12876
	isoform_13793
	isoform_15090
	isoform_15310
	isoform_16818
	isoform_17940
	isoform_199724
	isoform_209282
	isoform_211355
	isoform_221202
	isoform_227166
	isoform_237645
	isoform_243094
	isoform_248854
	isoform_264638
	isoform_265189
	isoform_267044
	isoform_270896
	isoform_271178
	isoform_292011
	isoform_294255
	isoform_294430
	isoform_30966
	isoform_58660
	isoform_4446
	isoform_5632
	isoform_5950
	isoform_326433
	isoform_331870
	isoform_333476
	isoform_38234
	isoform_38748
	isoform_43006
	isoform_46110
	isoform_7344
	isoform_9700
AGC_PDK1	isoform_149665
	isoform_156616
	isoform_159052
	isoform_181715
	isoform_194487
	isoform_224478
	isoform_227347
	isoform_230439
	isoform_235274
	isoform_243185
	isoform_271205
	isoform_285923
	isoform_288492
	isoform_25970
	isoform_29039
	isoform_29628
AGC_PKA-PKG	isoform_140122
	isoform_185570
	isoform_187998
	isoform_214211
	isoform_220671
	isoform_262008
	isoform_277863
	isoform_278363
	isoform_310180
	isoform_326082
	isoform_328731
	isoform_329200
	isoform_335791
	isoform_337183
	isoform_346875
AGC_RSK-2	isoform_102749
	isoform_110455
	isoform_112594
	isoform_133355
	isoform_136681
	isoform_138618
	isoform_138794
	isoform_139112
	isoform_140344
	isoform_140398
	isoform_141376
	isoform_142773
	isoform_143736
	isoform_144971
	isoform_147098
	isoform_147101
	isoform_151261
	isoform_152947
	isoform_153117
	isoform_153527
	isoform_157492
	isoform_160594
	isoform_168404
	isoform_170922
	isoform_172828
	isoform_177660
	isoform_177691
	isoform_178865
	isoform_179452
	isoform_179526
	isoform_180178
	isoform_180741
	isoform_181686
	isoform_181830
	isoform_10481
	isoform_10640
	isoform_11043
	isoform_11087
	isoform_11423
	isoform_11594
	isoform_12322
	isoform_12574
	isoform_12954
	isoform_15466
	isoform_15573
	isoform_16024
	isoform_16161
	isoform_17172
	isoform_17732
	isoform_17834
	isoform_18296
	isoform_184336
	isoform_187990
	isoform_191864
	isoform_197830
	isoform_199188
	isoform_205276
	isoform_206099
	isoform_207587
	isoform_209948
	isoform_210053
	isoform_211431
	isoform_214780
	isoform_216178
	isoform_217554
	isoform_218023
	isoform_218257
	isoform_220375
	isoform_220722
	isoform_221229
	isoform_222088
	isoform_222784
	isoform_228080
	isoform_229001
	isoform_233887
	isoform_234402
	isoform_238339
	isoform_242308
	isoform_244704
	isoform_246842
	isoform_248023
	isoform_251043
	isoform_253529
	isoform_253932
	isoform_18756
	isoform_18863
	isoform_19811
	isoform_19978
	isoform_20583
	isoform_22523
	isoform_24933
	isoform_256218
	isoform_256670
	isoform_260817
	isoform_261745
	isoform_263792
	isoform_266897
	isoform_269229
	isoform_270333
	isoform_272102
	isoform_272198
	isoform_276724
	isoform_277466
	isoform_278741
	isoform_281242
	isoform_283975
	isoform_284691
	isoform_289492
	isoform_289738
	isoform_297765
	isoform_301606
	isoform_302931
	isoform_304476
	isoform_308830
	isoform_309784
	isoform_310368
	isoform_310805
	isoform_311595
	isoform_312821
	isoform_313005
	isoform_315127
	isoform_316598
	isoform_318792
	isoform_320939
	isoform_321833
	isoform_323523
	isoform_29989
	isoform_30865
	isoform_30927
	isoform_31362
	isoform_5643
	isoform_6185
	isoform_329937
	isoform_330003
	isoform_330684
	isoform_331970
	isoform_332622
	isoform_342187
	isoform_351304
	isoform_351531
	isoform_351980
	isoform_353008
	isoform_353152
	isoform_32849
	isoform_36290
	isoform_39201
	isoform_40560
	isoform_41503
	isoform_41986
	isoform_43444
	isoform_44980
	isoform_45422
	isoform_65644
	isoform_72480
	isoform_88396
	isoform_92055
	isoform_97547
	isoform_7111
	isoform_8058
	isoform_8080
	isoform_8846
	isoform_695
	isoform_9186
	isoform_9713
	isoform_814
	isoform_932
	isoform_968
AGC-Pl	isoform_134056
	isoform_156902
	isoform_162906
	isoform_165522
	isoform_167028
	isoform_12733
	isoform_13715
	isoform_14599
	isoform_15244
	isoform_17790
	isoform_188335
	isoform_205825
	isoform_217776
	isoform_220023
	isoform_230117
	isoform_20330
	isoform_21653
	isoform_267723
	isoform_282686
	isoform_301294
	isoform_317335
	isoform_321506
	isoform_341005
Aur	isoform_155450
	isoform_199180
	isoform_199680
	isoform_267811
	isoform_30190
	isoform_339329
	isoform_45473
BUB	isoform_220435
	isoform_330110
CAMK_AMPK	isoform_152603
	isoform_157569
	isoform_162875
	isoform_11011
	isoform_12229
	isoform_12364
	isoform_13777
	isoform_14435
	isoform_14515
	isoform_14558
	isoform_14814
	isoform_17600
	isoform_18031
	isoform_201976
	isoform_204985
	isoform_205603
	isoform_244828
	isoform_19908
	isoform_22060
	isoform_282658
	isoform_287969
	isoform_299844
	isoform_308156
	isoform_26466
	isoform_32111
	isoform_341665
	isoform_38910
	isoform_74535
CAMK_CAMK1-DCAMKL	isoform_214513
	isoform_19508
	isoform_21494
	isoform_22678
	isoform_271446
	isoform_297203
	isoform_320226
	isoform_58678
CAMK_CAMKL-CHK1	isoform_135869
	isoform_137185
	isoform_137893
	isoform_139414
	isoform_141358
	isoform_147263
	isoform_149492
	isoform_154723
	isoform_159286
	isoform_159969
	isoform_161760
	isoform_163394
	isoform_165637
	isoform_168434
	isoform_168900
	isoform_173647
	isoform_176764
	isoform_178666
	isoform_180263
	isoform_181698
	isoform_10159
	isoform_10946
	isoform_11295
	isoform_12142
	isoform_13098
	isoform_14049
	isoform_15154
	isoform_15258
	isoform_16592
	isoform_16636
	isoform_16977
	isoform_17505
	isoform_17583
	isoform_17949
	isoform_183955
	isoform_190140
	isoform_194121
	isoform_194751
	isoform_195844
	isoform_197762
	isoform_199301
	isoform_199844
	isoform_203397
	isoform_209266
	isoform_210437
	isoform_210959
	isoform_214635
	isoform_217371
	isoform_229091
	isoform_234488
	isoform_235567
	isoform_237445
	isoform_240677
	isoform_243933
	isoform_244660
	isoform_246606
	isoform_247515
	isoform_250059
	isoform_250540
	isoform_251191
	isoform_251216
	isoform_18437
	isoform_18820
	isoform_20220
	isoform_20509
	isoform_20739
	isoform_20980
	isoform_21040
	isoform_21999
	isoform_23739
	isoform_23832
	isoform_24165
	isoform_257622
	isoform_258898
	isoform_265940
	isoform_267757
	isoform_268891
	isoform_270235
	isoform_271583
	isoform_273894
	isoform_275776
	isoform_281170
	isoform_289986
	isoform_294466
	isoform_298416
	isoform_300147
	isoform_300194
	isoform_301885
	isoform_305335
	isoform_306685
	isoform_307151
	isoform_307212
	isoform_310607
	isoform_312029
	isoform_313545
	isoform_315819
	isoform_320462
	isoform_323350
	isoform_324491
	isoform_26020
	isoform_26283
	isoform_26812
	isoform_27364
	isoform_27969
	isoform_29156
	isoform_31595
	isoform_51504
	isoform_59038
	isoform_4830
	isoform_5325
	isoform_5567
	isoform_330549
	isoform_331991
	isoform_333553
	isoform_335296
	isoform_339493
	isoform_340825
	isoform_343415
	isoform_346471
	isoform_346577
	isoform_348898
	isoform_351973
	isoform_353117
	isoform_38008
	isoform_43204
	isoform_44108
	isoform_45915
	isoform_49687
	isoform_68194
	isoform_79635
	isoform_80519
	isoform_7508
	isoform_7652
	isoform_9106
CAMK_CAMKL-LKB	isoform_133179
	isoform_137946
	isoform_18329
	isoform_214085
	isoform_221402
	isoform_222733
	isoform_252954
	isoform_21363
	isoform_263058
	isoform_269172
	isoform_30335
	isoform_31880
	isoform_325417
	isoform_328385
	isoform_339482
	isoform_35453
	isoform_35867
CAMK_CAMKL-PASK-PIM	isoform_309992
CAMK_CDPK	isoform_134931
CAMK_CDPK	isoform_136743
CAMK_CDPK	isoform_138334
CAMK_CDPK	isoform_139188
CAMK_CDPK	isoform_141023
CAMK_CDPK	isoform_142901
CAMK_CDPK	isoform_143153
CAMK_CDPK	isoform_145311
CAMK_CDPK	isoform_145561
CAMK_CDPK	isoform_146449
CAMK_CDPK	isoform_147040
CAMK_CDPK	isoform_148758
CAMK_CDPK	isoform_149159
CAMK_CDPK	isoform_151300
CAMK_CDPK	isoform_151502
CAMK_CDPK	isoform_152052
CAMK_CDPK	isoform_152683
CAMK_CDPK	isoform_154261
CAMK_CDPK	isoform_155559
CAMK_CDPK	isoform_157258
CAMK_CDPK	isoform_158837
CAMK_CDPK	isoform_159614
CAMK_CDPK	isoform_163372
CAMK_CDPK	isoform_175978
CAMK_CDPK	isoform_177143
CAMK_CDPK	isoform_177260
CAMK_CDPK	isoform_178626
CAMK_CDPK	isoform_179090
CAMK_CDPK	isoform_182518
CAMK_CDPK	isoform_183232
CAMK_CDPK	isoform_183744
CAMK_CDPK	isoform_10491
CAMK_CDPK	isoform_10912
CAMK_CDPK	isoform_11196
CAMK_CDPK	isoform_11497
CAMK_CDPK	isoform_11553
CAMK_CDPK	isoform_11561
CAMK_CDPK	isoform_11602
CAMK_CDPK	isoform_11783
CAMK_CDPK	isoform_12157
CAMK_CDPK	isoform_12416
CAMK_CDPK	isoform_12622
CAMK_CDPK	isoform_12680
CAMK_CDPK	isoform_12891
CAMK_CDPK	isoform_13382
CAMK_CDPK	isoform_13491
CAMK_CDPK	isoform_13688
CAMK_CDPK	isoform_13909
CAMK_CDPK	isoform_14096
CAMK_CDPK	isoform_14191
CAMK_CDPK	isoform_14398
CAMK_CDPK	isoform_14496
CAMK_CDPK	isoform_14608
CAMK_CDPK	isoform_14978
CAMK_CDPK	isoform_15553
CAMK_CDPK	isoform_15962
CAMK_CDPK	isoform_16493
CAMK_CDPK	isoform_16624
CAMK_CDPK	isoform_16747
CAMK_CDPK	isoform_16767
CAMK_CDPK	isoform_17907
CAMK_CDPK	isoform_18189
CAMK_CDPK	isoform_184592
CAMK_CDPK	isoform_185140
CAMK_CDPK	isoform_187378
CAMK_CDPK	isoform_187529
CAMK_CDPK	isoform_189013
CAMK_CDPK	isoform_193230
CAMK_CDPK	isoform_193523
CAMK_CDPK	isoform_193954
CAMK_CDPK	isoform_196103
CAMK_CDPK	isoform_196265
CAMK_CDPK	isoform_196499
CAMK_CDPK	isoform_196763
CAMK_CDPK	isoform_196911
CAMK_CDPK	isoform_198417
CAMK_CDPK	isoform_199682
CAMK_CDPK	isoform_201261
CAMK_CDPK	isoform_202754
CAMK_CDPK	isoform_202928
CAMK_CDPK	isoform_203357
CAMK_CDPK	isoform_204328
CAMK_CDPK	isoform_205450
CAMK_CDPK	isoform_206238
CAMK_CDPK	isoform_206505
CAMK_CDPK	isoform_206538
CAMK_CDPK	isoform_206787
CAMK_CDPK	isoform_208851
CAMK_CDPK	isoform_209591
CAMK_CDPK	isoform_209659
CAMK_CDPK	isoform_211404
CAMK_CDPK	isoform_214471
CAMK_CDPK	isoform_216819
CAMK_CDPK	isoform_219855
CAMK_CDPK	isoform_220082
CAMK_CDPK	isoform_221197
CAMK_CDPK	isoform_222858
CAMK_CDPK	isoform_223033
CAMK_CDPK	isoform_223550
CAMK_CDPK	isoform_224023
CAMK_CDPK	isoform_226483
CAMK_CDPK	isoform_229412
CAMK_CDPK	isoform_229452
CAMK_CDPK	isoform_229896
CAMK_CDPK	isoform_233785
CAMK_CDPK	isoform_234819
CAMK_CDPK	isoform_235324
CAMK_CDPK	isoform_235372
CAMK_CDPK	isoform_236678
CAMK_CDPK	isoform_238869
CAMK_CDPK	isoform_239059
CAMK_CDPK	isoform_239079
CAMK_CDPK	isoform_239908
CAMK_CDPK	isoform_245876
CAMK_CDPK	isoform_246059
CAMK_CDPK	isoform_246788
CAMK_CDPK	isoform_246879
CAMK_CDPK	isoform_247058
CAMK_CDPK	isoform_248589
CAMK_CDPK	isoform_249726
CAMK_CDPK	isoform_253206
CAMK_CDPK	isoform_253993
CAMK_CDPK	isoform_18583
CAMK_CDPK	isoform_18976
CAMK_CDPK	isoform_19207
CAMK_CDPK	isoform_20069
CAMK_CDPK	isoform_20343
CAMK_CDPK	isoform_20366
CAMK_CDPK	isoform_21106
CAMK_CDPK	isoform_21178
CAMK_CDPK	isoform_23782
CAMK_CDPK	isoform_24162
CAMK_CDPK	isoform_24557
CAMK_CDPK	isoform_1897
CAMK_CDPK	isoform_1949
CAMK_CDPK	isoform_255630
CAMK_CDPK	isoform_256869
CAMK_CDPK	isoform_257101
CAMK_CDPK	isoform_259910
CAMK_CDPK	isoform_260559
CAMK_CDPK	isoform_264461
CAMK_CDPK	isoform_264700
CAMK_CDPK	isoform_270959
CAMK_CDPK	isoform_272464
CAMK_CDPK	isoform_273848
CAMK_CDPK	isoform_274409
CAMK_CDPK	isoform_274565
CAMK_CDPK	isoform_275217
CAMK_CDPK	isoform_275626
CAMK_CDPK	isoform_277096
CAMK_CDPK	isoform_278188
CAMK_CDPK	isoform_278727
CAMK_CDPK	isoform_279359
CAMK_CDPK	isoform_280436
CAMK_CDPK	isoform_280802
CAMK_CDPK	isoform_281234
CAMK_CDPK	isoform_281571
CAMK_CDPK	isoform_284336
CAMK_CDPK	isoform_286095
CAMK_CDPK	isoform_286752
CAMK_CDPK	isoform_286917
CAMK_CDPK	isoform_287147
CAMK_CDPK	isoform_289404
CAMK_CDPK	isoform_290567
CAMK_CDPK	isoform_290635
CAMK_CDPK	isoform_292906
CAMK_CDPK	isoform_294380
CAMK_CDPK	isoform_294715
CAMK_CDPK	isoform_296949
CAMK_CDPK	isoform_300003
CAMK_CDPK	isoform_300359
CAMK_CDPK	isoform_302322
CAMK_CDPK	isoform_303724
CAMK_CDPK	isoform_304463
CAMK_CDPK	isoform_304586
CAMK_CDPK	isoform_304833
CAMK_CDPK	isoform_305043
CAMK_CDPK	isoform_306294
CAMK_CDPK	isoform_307925
CAMK_CDPK	isoform_309643
CAMK_CDPK	isoform_312095
CAMK_CDPK	isoform_313213
CAMK_CDPK	isoform_313778
CAMK_CDPK	isoform_314607
CAMK_CDPK	isoform_318200
CAMK_CDPK	isoform_318949
CAMK_CDPK	isoform_319073
CAMK_CDPK	isoform_319263
CAMK_CDPK	isoform_320916
CAMK_CDPK	isoform_321090
CAMK_CDPK	isoform_321677
CAMK_CDPK	isoform_323727
CAMK_CDPK	isoform_323999
CAMK_CDPK	isoform_26332
CAMK_CDPK	isoform_26403
CAMK_CDPK	isoform_26651
CAMK_CDPK	isoform_26931
CAMK_CDPK	isoform_26961
CAMK_CDPK	isoform_27491
CAMK_CDPK	isoform_28234
CAMK_CDPK	isoform_29146
CAMK_CDPK	isoform_30445
CAMK_CDPK	isoform_55928
CAMK_CDPK	isoform_4099
CAMK_CDPK	isoform_4127
CAMK_CDPK	isoform_4339
CAMK_CDPK	isoform_4481
CAMK_CDPK	isoform_4546
CAMK_CDPK	isoform_4554
CAMK_CDPK	isoform_4602
CAMK_CDPK	isoform_4676
CAMK_CDPK	isoform_4791
CAMK_CDPK	isoform_4933
CAMK_CDPK	isoform_5130
CAMK_CDPK	isoform_5393
CAMK_CDPK	isoform_5500
CAMK_CDPK	isoform_5561
CAMK_CDPK	isoform_5583
CAMK_CDPK	isoform_5676
CAMK_CDPK	isoform_5841
CAMK_CDPK	isoform_6083
CAMK_CDPK	isoform_6113
CAMK_CDPK	isoform_6253
CAMK_CDPK	isoform_6273
CAMK_CDPK	isoform_6379
CAMK_CDPK	isoform_326238
CAMK_CDPK	isoform_328809
CAMK_CDPK	isoform_329590
CAMK_CDPK	isoform_332048
CAMK_CDPK	isoform_332523
CAMK_CDPK	isoform_341222
CAMK_CDPK	isoform_344487
CAMK_CDPK	isoform_344555
CAMK_CDPK	isoform_344761
CAMK_CDPK	isoform_346128
CAMK_CDPK	isoform_346848
CAMK_CDPK	isoform_352341
CAMK_CDPK	isoform_353764
CAMK_CDPK	isoform_32540
CAMK_CDPK	isoform_33173
CAMK_CDPK	isoform_33996
CAMK_CDPK	isoform_34322
CAMK_CDPK	isoform_36503
CAMK_CDPK	isoform_37047
CAMK_CDPK	isoform_37873
CAMK_CDPK	isoform_38477
CAMK_CDPK	isoform_44700
CAMK_CDPK	isoform_47363
CAMK_CDPK	isoform_49085
CAMK_CDPK	isoform_64221
CAMK_CDPK	isoform_69767
CAMK_CDPK	isoform_83968
CAMK_CDPK	isoform_6437
CAMK_CDPK	isoform_7633
CAMK_CDPK	isoform_7698
CAMK_CDPK	isoform_8094
CAMK_CDPK	isoform_8302
CAMK_CDPK	isoform_8341
CAMK_CDPK	isoform_8698
CAMK_CDPK	isoform_9015
CAMK_CDPK	isoform_9054
CAMK_CDPK	isoform_9075
CAMK_CDPK	isoform_9122
CAMK_CDPK	isoform_9246
CAMK_CDPK	isoform_9681
CAMK_OST1L	isoform_135509
CAMK_OST1L	isoform_136308
CAMK_OST1L	isoform_144914
CAMK_OST1L	isoform_146422
CAMK_OST1L	isoform_148699
CAMK_OST1L	isoform_149369
CAMK_OST1L	isoform_152353
CAMK_OST1L	isoform_157181
CAMK_OST1L	isoform_161503
CAMK_OST1L	isoform_163266
CAMK_OST1L	isoform_165459
CAMK_OST1L	isoform_175548
CAMK_OST1L	isoform_175818
CAMK_OST1L	isoform_180213
CAMK_OST1L	isoform_182196
CAMK_OST1L	isoform_183097
CAMK_OST1L	isoform_184257
CAMK_OST1L	isoform_186902
CAMK_OST1L	isoform_191144
CAMK_OST1L	isoform_192259
CAMK_OST1L	isoform_195566
CAMK_OST1L	isoform_196786
CAMK_OST1L	isoform_198185
CAMK_OST1L	isoform_202787
CAMK_OST1L	isoform_209985
CAMK_OST1L	isoform_210874
CAMK_OST1L	isoform_217398
CAMK_OST1L	isoform_217448
CAMK_OST1L	isoform_221001
CAMK_OST1L	isoform_244701
CAMK_OST1L	isoform_245555
CAMK_OST1L	isoform_247316
CAMK_OST1L	isoform_247804
CAMK_OST1L	isoform_247917
CAMK_OST1L	isoform_252221
CAMK_OST1L	isoform_252970
CAMK_OST1L	isoform_19562
CAMK_OST1L	isoform_21409
CAMK_OST1L	isoform_22732
CAMK_OST1L	isoform_23775
CAMK_OST1L	isoform_23934
CAMK_OST1L	isoform_24782
CAMK_OST1L	isoform_258119
CAMK_OST1L	isoform_260270
CAMK_OST1L	isoform_264924
CAMK_OST1L	isoform_270301
CAMK_OST1L	isoform_273580
CAMK_OST1L	isoform_274843
CAMK_OST1L	isoform_275436
CAMK_OST1L	isoform_276607
CAMK_OST1L	isoform_277910
CAMK_OST1L	isoform_280254
CAMK_OST1L	isoform_284798
CAMK_OST1L	isoform_286299
CAMK_OST1L	isoform_287365
CAMK_OST1L	isoform_291545
CAMK_OST1L	isoform_295070
CAMK_OST1L	isoform_295135
CAMK_OST1L	isoform_298831
CAMK_OST1L	isoform_301115
CAMK_OST1L	isoform_302366
CAMK_OST1L	isoform_303170
CAMK_OST1L	isoform_305684
CAMK_OST1L	isoform_315906
CAMK_OST1L	isoform_320357
CAMK_OST1L	isoform_321270
CAMK_OST1L	isoform_322626
CAMK_OST1L	isoform_323934
CAMK_OST1L	isoform_26160
CAMK_OST1L	isoform_26557
CAMK_OST1L	isoform_26981
CAMK_OST1L	isoform_28156
CAMK_OST1L	isoform_28506
CAMK_OST1L	isoform_28646
CAMK_OST1L	isoform_29630
CAMK_OST1L	isoform_31670
CAMK_OST1L	isoform_50846
CAMK_OST1L	isoform_51405
CAMK_OST1L	isoform_52483
CAMK_OST1L	isoform_53207
CAMK_OST1L	isoform_54304
CAMK_OST1L	isoform_56626
CAMK_OST1L	isoform_60539
CAMK_OST1L	isoform_329871
CAMK_OST1L	isoform_331401
CAMK_OST1L	isoform_332716
CAMK_OST1L	isoform_333330
CAMK_OST1L	isoform_336555
CAMK_OST1L	isoform_339570
CAMK_OST1L	isoform_343952
CAMK_OST1L	isoform_345123
CAMK_OST1L	isoform_346321
CAMK_OST1L	isoform_347023
CAMK_OST1L	isoform_348820
CAMK_OST1L	isoform_349399
CAMK_OST1L	isoform_353175
CAMK_OST1L	isoform_353735
CAMK_OST1L	isoform_33985
CAMK_OST1L	isoform_34013
CAMK_OST1L	isoform_34014
CAMK_OST1L	isoform_34314
CAMK_OST1L	isoform_34497
CAMK_OST1L	isoform_34694
CAMK_OST1L	isoform_35094
CAMK_OST1L	isoform_35735
CAMK_OST1L	isoform_35864
CAMK_OST1L	isoform_36427
CAMK_OST1L	isoform_36458
CAMK_OST1L	isoform_36908
CAMK_OST1L	isoform_37503
CAMK_OST1L	isoform_37694
CAMK_OST1L	isoform_38801
CAMK_OST1L	isoform_40099
CAMK_OST1L	isoform_40132
CAMK_OST1L	isoform_41046
CAMK_OST1L	isoform_41475
CAMK_OST1L	isoform_41564
CAMK_OST1L	isoform_42454
CAMK_OST1L	isoform_42538
CAMK_OST1L	isoform_43178
CAMK_OST1L	isoform_44299
CAMK_OST1L	isoform_44886
CAMK_OST1L	isoform_47775
CAMK_OST1L	isoform_47899
CAMK_OST1L	isoform_49954
CAMK_OST1L	isoform_66187
CAMK_OST1L	isoform_71012
CAMK_OST1L	isoform_78813
CK1_CK1	isoform_110377
CK1_CK1	isoform_148797
CK1_CK1	isoform_151943
CK1_CK1	isoform_169127
CK1_CK1	isoform_171258
CK1_CK1	isoform_10137
CK1_CK1	isoform_11991
CK1_CK1	isoform_13339
CK1_CK1	isoform_13894
CK1_CK1	isoform_15062
CK1_CK1	isoform_16058
CK1_CK1	isoform_16932
CK1_CK1	isoform_17025
CK1_CK1	isoform_188019
CK1_CK1	isoform_204781
CK1_CK1	isoform_242469
CK1_CK1	isoform_258518
CK1_CK1	isoform_271037
CK1_CK1	isoform_289136
CK1_CK1	isoform_299160
CK1_CK1	isoform_300244
CK1_CK1	isoform_301015
CK1_CK1	isoform_58281
CK1_CK1	isoform_6339
CK1_CK1	isoform_342715
CK1_CK1	isoform_349298
CK1_CK1	isoform_6924
CK1_CK1	isoform_7293
CK1_CK1	isoform_7980
CK1_CK1	isoform_8677
CK1_CK1	isoform_9400
CK1_CK1-Pl	isoform_142344
CK1_CK1-Pl	isoform_148112
CK1_CK1-Pl	isoform_150990
CK1_CK1-Pl	isoform_160436
CK1_CK1-Pl	isoform_172667
CK1_CK1-Pl	isoform_187867
CK1_CK1-Pl	isoform_198671
CK1_CK1-Pl	isoform_202298
CK1_CK1-Pl	isoform_205057
CK1_CK1-Pl	isoform_227019
CK1_CK1-Pl	isoform_228861
CK1_CK1-Pl	isoform_229788
CK1_CK1-Pl	isoform_262995
CK1_CK1-Pl	isoform_265839
CK1_CK1-Pl	isoform_271876
CK1_CK1-Pl	isoform_294028
CK1_CK1-Pl	isoform_295937
CK1_CK1-Pl	isoform_307320
CK1_CK1-Pl	isoform_27510
CK1_CK1-Pl	isoform_2583
CK1_CK1-Pl	isoform_2589
CK1_CK1-Pl	isoform_2605
CK1_CK1-Pl	isoform_2821
CK1_CK1-Pl	isoform_2919
CK1_CK1-Pl	isoform_3141
CK1_CK1-Pl	isoform_3406
CK1_CK1-Pl	isoform_4024
CK1_CK1-Pl	isoform_4561
CK1_CK1-Pl	isoform_4721
CK1_CK1-Pl	isoform_333512
CK1_CK1-Pl	isoform_348763
CMGC_CDK-CCRK	isoform_139723
CMGC_CDK-CCRK	isoform_172916
CMGC_CDK-CCRK	isoform_181788
CMGC_CDK-CCRK	isoform_195938
CMGC_CDK-CCRK	isoform_7429
CMGC_CDK-CDK7	isoform_178037
CMGC_CDK-CDK7	isoform_178866
CMGC_CDK-CDK7	isoform_17593
CMGC_CDK-CDK7	isoform_17932
CMGC_CDK-CDK7	isoform_18034
CMGC_CDK-CDK7	isoform_19170
CMGC_CDK-CDK7	isoform_21061
CMGC_CDK-CDK7	isoform_21159
CMGC_CDK-CDK7	isoform_22571
CMGC_CDK-CDK7	isoform_22624
CMGC_CDK-CDK7	isoform_23835
CMGC_CDK-CDK7	isoform_270408
CMGC_CDK-CDK7	isoform_25435
CMGC_CDK-CDK7	isoform_26715
CMGC_CDK-CDK7	isoform_29930
CMGC_CDK-CDK7	isoform_31230
CMGC_CDK-CDK7	isoform_336526
CMGC_CDK-CDK7	isoform_39163
CMGC_CDK-CDK8	isoform_143915
CMGC_CDK-CDK8	isoform_22501
CMGC_CDK-CDK8	isoform_23699
CMGC_CDK-CDK8	isoform_284582
CMGC_CDK-CDK8	isoform_294925
CMGC_CDK-CDK8	isoform_328229
CMGC_CDK-CRK7-CDK9	isoform_137942
CMGC_CDK-CRK7-CDK9	isoform_142136
CMGC_CDK-CRK7-CDK9	isoform_145229
CMGC_CDK-CRK7-CDK9	isoform_146595
CMGC_CDK-CRK7-CDK9	isoform_149143
CMGC_CDK-CRK7-CDK9	isoform_163007
CMGC_CDK-CRK7-CDK9	isoform_171157
CMGC_CDK-CRK7-CDK9	isoform_172262
CMGC_CDK-CRK7-CDK9	isoform_176162
CMGC_CDK-CRK7-CDK9	isoform_176244
CMGC_CDK-CRK7-CDK9	isoform_180389
CMGC_CDK-CRK7-CDK9	isoform_182221
CMGC_CDK-CRK7-CDK9	isoform_11139
CMGC_CDK-CRK7-CDK9	isoform_12681
CMGC_CDK-CRK7-CDK9	isoform_1220
CMGC_CDK-CRK7-CDK9	isoform_1415
CMGC_CDK-CRK7-CDK9	isoform_184799
CMGC_CDK-CRK7-CDK9	isoform_190539
CMGC_CDK-CRK7-CDK9	isoform_195047
CMGC_CDK-CRK7-CDK9	isoform_197092
CMGC_CDK-CRK7-CDK9	isoform_198639
CMGC_CDK-CRK7-CDK9	isoform_203516
CMGC_CDK-CRK7-CDK9	isoform_203973
CMGC_CDK-CRK7-CDK9	isoform_205311
CMGC_CDK-CRK7-CDK9	isoform_220828
CMGC_CDK-CRK7-CDK9	isoform_226817
CMGC_CDK-CRK7-CDK9	isoform_235685
CMGC_CDK-CRK7-CDK9	isoform_242520
CMGC_CDK-CRK7-CDK9	isoform_243638
CMGC_CDK-CRK7-CDK9	isoform_251396
CMGC_CDK-CRK7-CDK9	isoform_251408
CMGC_CDK-CRK7-CDK9	isoform_23498
CMGC_CDK-CRK7-CDK9	isoform_24401
CMGC_CDK-CRK7-CDK9	isoform_1889
CMGC_CDK-CRK7-CDK9	isoform_266048
CMGC_CDK-CRK7-CDK9	isoform_269582
CMGC_CDK-CRK7-CDK9	isoform_269733
CMGC_CDK-CRK7-CDK9	isoform_270309
CMGC_CDK-CRK7-CDK9	isoform_272916
CMGC_CDK-CRK7-CDK9	isoform_292324
CMGC_CDK-CRK7-CDK9	isoform_294501
CMGC_CDK-CRK7-CDK9	isoform_299838
CMGC_CDK-CRK7-CDK9	isoform_300407
CMGC_CDK-CRK7-CDK9	isoform_302226
CMGC_CDK-CRK7-CDK9	isoform_306257
CMGC_CDK-CRK7-CDK9	isoform_313363
CMGC_CDK-CRK7-CDK9	isoform_318321
CMGC_CDK-CRK7-CDK9	isoform_319647
CMGC_CDK-CRK7-CDK9	isoform_321890
CMGC_CDK-CRK7-CDK9	isoform_2914
CMGC_CDK-CRK7-CDK9	isoform_3421
CMGC_CDK-CRK7-CDK9	isoform_3500
CMGC_CDK-CRK7-CDK9	isoform_3662
CMGC_CDK-CRK7-CDK9	isoform_3732
CMGC_CDK-CRK7-CDK9	isoform_3743
CMGC_CDK-CRK7-CDK9	isoform_4107
CMGC_CDK-CRK7-CDK9	isoform_4277
CMGC_CDK-CRK7-CDK9	isoform_4296
CMGC_CDK-CRK7-CDK9	isoform_4297
CMGC_CDK-CRK7-CDK9	isoform_4349
CMGC_CDK-CRK7-CDK9	isoform_4578
CMGC_CDK-CRK7-CDK9	isoform_4790
CMGC_CDK-CRK7-CDK9	isoform_4795
CMGC_CDK-CRK7-CDK9	isoform_5163
CMGC_CDK-CRK7-CDK9	isoform_5271
CMGC_CDK-CRK7-CDK9	isoform_5897
CMGC_CDK-CRK7-CDK9	isoform_5939
CMGC_CDK-CRK7-CDK9	isoform_325968
CMGC_CDK-CRK7-CDK9	isoform_327792
CMGC_CDK-CRK7-CDK9	isoform_335856
CMGC_CDK-CRK7-CDK9	isoform_349668
CMGC_CDK-CRK7-CDK9	isoform_40026
CMGC_CDK-CRK7-CDK9	isoform_3361
CMGC_CDK-CRK7-CDK9	isoform_7629
CMGC_CDK-CRK7-CDK9	isoform_7903
CMGC_CDK-CRK7-CDK9	isoform_9235
CMGC_CDKL-Cr	isoform_170869
CMGC_CDKL-Cr	isoform_311833
CMGC_CDKL-Cr	isoform_347563
CMGC_CDK-PITSLRE	isoform_238459
CMGC_CDK-PITSLRE	isoform_253449
CMGC_CDK-PITSLRE	isoform_282676
CMGC_CDK-PITSLRE	isoform_289733
CMGC_CDK-PITSLRE	isoform_3737
CMGC_CDK-PITSLRE	isoform_338982
CMGC_CDK-PITSLRE	isoform_345989
CMGC_CDK-PITSLRE	isoform_67619
CMGC_CDK-PITSLRE	isoform_7191
CMGC_CDK-Pl	isoform_101894
CMGC_CDK-Pl	isoform_133263
CMGC_CDK-Pl	isoform_134007
CMGC_CDK-Pl	isoform_134514
CMGC_CDK-Pl	isoform_135816
CMGC_CDK-Pl	isoform_136660
CMGC_CDK-Pl	isoform_137422
CMGC_CDK-Pl	isoform_141450
CMGC_CDK-Pl	isoform_143462
CMGC_CDK-Pl	isoform_144512
CMGC_CDK-Pl	isoform_151073
CMGC_CDK-Pl	isoform_155485
CMGC_CDK-Pl	isoform_157276
CMGC_CDK-Pl	isoform_159305
CMGC_CDK-Pl	isoform_160212
CMGC_CDK-Pl	isoform_165559
CMGC_CDK-Pl	isoform_166056
CMGC_CDK-Pl	isoform_174052
CMGC_CDK-Pl	isoform_174453
CMGC_CDK-Pl	isoform_178629
CMGC_CDK-Pl	isoform_182771
CMGC_CDK-Pl	isoform_11896
CMGC_CDK-Pl	isoform_12678
CMGC_CDK-Pl	isoform_13059
CMGC_CDK-Pl	isoform_14665
CMGC_CDK-Pl	isoform_15160
CMGC_CDK-Pl	isoform_18126
CMGC_CDK-Pl	isoform_184876
CMGC_CDK-Pl	isoform_185105
CMGC_CDK-Pl	isoform_185216
CMGC_CDK-Pl	isoform_186157
CMGC_CDK-Pl	isoform_187815
CMGC_CDK-Pl	isoform_189094
CMGC_CDK-Pl	isoform_189620
CMGC_CDK-Pl	isoform_189797
CMGC_CDK-Pl	isoform_196629
CMGC_CDK-Pl	isoform_196840
CMGC_CDK-Pl	isoform_198466
CMGC_CDK-Pl	isoform_208948
CMGC_CDK-Pl	isoform_209669
CMGC_CDK-Pl	isoform_211675
CMGC_CDK-Pl	isoform_213756
CMGC_CDK-Pl	isoform_220078
CMGC_CDK-Pl	isoform_223300
CMGC_CDK-Pl	isoform_224490
CMGC_CDK-Pl	isoform_224656
CMGC_CDK-Pl	isoform_227226
CMGC_CDK-Pl	isoform_230175
CMGC_CDK-Pl	isoform_230593
CMGC_CDK-Pl	isoform_232064
CMGC_CDK-Pl	isoform_233392
CMGC_CDK-Pl	isoform_233775
CMGC_CDK-Pl	isoform_236440
CMGC_CDK-Pl	isoform_237509
CMGC_CDK-Pl	isoform_238251
CMGC_CDK-Pl	isoform_240636
CMGC_CDK-Pl	isoform_243669
CMGC_CDK-Pl	isoform_244832
CMGC_CDK-Pl	isoform_246805
CMGC_CDK-Pl	isoform_247019
CMGC_CDK-Pl	isoform_247140
CMGC_CDK-Pl	isoform_250425
CMGC_CDK-Pl	isoform_250904
CMGC_CDK-Pl	isoform_253901
CMGC_CDK-Pl	isoform_21502
CMGC_CDK-Pl	isoform_24640
CMGC_CDK-Pl	isoform_255156
CMGC_CDK-Pl	isoform_255510
CMGC_CDK-Pl	isoform_256230
CMGC_CDK-Pl	isoform_258213
CMGC_CDK-Pl	isoform_258357
CMGC_CDK-Pl	isoform_265820
CMGC_CDK-Pl	isoform_269018
CMGC_CDK-Pl	isoform_273465
CMGC_CDK-Pl	isoform_279156
CMGC_CDK-Pl	isoform_280479
CMGC_CDK-Pl	isoform_281221
CMGC_CDK-Pl	isoform_292620
CMGC_CDK-Pl	isoform_295664
CMGC_CDK-Pl	isoform_295863
CMGC_CDK-Pl	isoform_296030
CMGC_CDK-Pl	isoform_300797
CMGC_CDK-Pl	isoform_301972
CMGC_CDK-Pl	isoform_306338
CMGC_CDK-Pl	isoform_309038
CMGC_CDK-Pl	isoform_309179
CMGC_CDK-Pl	isoform_309516
CMGC_CDK-Pl	isoform_311935
CMGC_CDK-Pl	isoform_312066
CMGC_CDK-Pl	isoform_319042
CMGC_CDK-Pl	isoform_320403
CMGC_CDK-Pl	isoform_321958
CMGC_CDK-Pl	isoform_28463
CMGC_CDK-Pl	isoform_53960
CMGC_CDK-Pl	isoform_54931
CMGC_CDK-Pl	isoform_55865
CMGC_CDK-Pl	isoform_56135
CMGC_CDK-Pl	isoform_57287
CMGC_CDK-Pl	isoform_58844
CMGC_CDK-Pl	isoform_328665
CMGC_CDK-Pl	isoform_338781
CMGC_CDK-Pl	isoform_340419
CMGC_CDK-Pl	isoform_342525
CMGC_CDK-Pl	isoform_348842
CMGC_CDK-Pl	isoform_348956
CMGC_CDK-Pl	isoform_349646
CMGC_CDK-Pl	isoform_350103
CMGC_CDK-Pl	isoform_32874
CMGC_CDK-Pl	isoform_33142
CMGC_CDK-Pl	isoform_34817
CMGC_CDK-Pl	isoform_34934
CMGC_CDK-Pl	isoform_41531
CMGC_CDK-Pl	isoform_41684
CMGC_CDK-Pl	isoform_41760
CMGC_CDK-Pl	isoform_42082
CMGC_CDK-Pl	isoform_42135
CMGC_CDK-Pl	isoform_43297
CMGC_CDK-Pl	isoform_43813
CMGC_CDK-Pl	isoform_48530
CMGC_CDK-Pl	isoform_50218
CMGC_CDK-Pl	isoform_65457
CMGC_CDK-Pl	isoform_66133
CMGC_CDK-Pl	isoform_66707
CMGC_CDK-Pl	isoform_68060
CMGC_CDK-Pl	isoform_84125
CMGC_CDK-Pl	isoform_85651
CMGC_CDK-Pl	isoform_93865
CMGC_CK2	isoform_139848
CMGC_CK2	isoform_153092
CMGC_CK2	isoform_153093
CMGC_CK2	isoform_154673
CMGC_CK2	isoform_155517
CMGC_CK2	isoform_171529
CMGC_CK2	isoform_11771
CMGC_CK2	isoform_12721
CMGC_CK2	isoform_12922
CMGC_CK2	isoform_13332
CMGC_CK2	isoform_14933
CMGC_CK2	isoform_17079
CMGC_CK2	isoform_17808
CMGC_CK2	isoform_193430
CMGC_CK2	isoform_203410
CMGC_CK2	isoform_215996
CMGC_CK2	isoform_220109
CMGC_CK2	isoform_225593
CMGC_CK2	isoform_228247
CMGC_CK2	isoform_229176
CMGC_CK2	isoform_240048
CMGC_CK2	isoform_245546
CMGC_CK2	isoform_249004
CMGC_CK2	isoform_249658
CMGC_CK2	isoform_262974
CMGC_CK2	isoform_264454
CMGC_CK2	isoform_265955
CMGC_CK2	isoform_293764
CMGC_CK2	isoform_299197
CMGC_CK2	isoform_30888
CMGC_CK2	isoform_30950
CMGC_CK2	isoform_31550
CMGC_CK2	isoform_52097
CMGC_CK2	isoform_331968
CMGC_CK2	isoform_335974
CMGC_CK2	isoform_342100
CMGC_CK2	isoform_344367
CMGC_CK2	isoform_33770
CMGC_CK2	isoform_34824
CMGC_CK2	isoform_35035
CMGC_CK2	isoform_35190
CMGC_CK2	isoform_36675
CMGC_CK2	isoform_36790
CMGC_CK2	isoform_37336
CMGC_CK2	isoform_37784
CMGC_CK2	isoform_39117
CMGC_CK2	isoform_43281
CMGC_CK2	isoform_68763
CMGC_CK2	isoform_84032
CMGC_CK2	isoform_95098
CMGC_CLK	isoform_140328
CMGC_CLK	isoform_141670
CMGC_CLK	isoform_146818
CMGC_CLK	isoform_148573
CMGC_CLK	isoform_153936
CMGC_CLK	isoform_154040
CMGC_CLK	isoform_10814
CMGC_CLK	isoform_184974
CMGC_CLK	isoform_202740
CMGC_CLK	isoform_205910
CMGC_CLK	isoform_214549
CMGC_CLK	isoform_217107
CMGC_CLK	isoform_224773
CMGC_CLK	isoform_231717
CMGC_CLK	isoform_235992
CMGC_CLK	isoform_245383
CMGC_CLK	isoform_252073
CMGC_CLK	isoform_20006
CMGC_CLK	isoform_23675
CMGC_CLK	isoform_281146
CMGC_CLK	isoform_284794
CMGC_CLK	isoform_292392
CMGC_CLK	isoform_312384
CMGC_CLK	isoform_315640
CMGC_CLK	isoform_29480
CMGC_CLK	isoform_56426
CMGC_CLK	isoform_346368
CMGC_CLK	isoform_349714
CMGC_CLK	isoform_351964
CMGC_CLK	isoform_33158
CMGC_CLK	isoform_46655
CMGC_CLK	isoform_47358
CMGC_DYRK-PRP4	isoform_166868
CMGC_DYRK-PRP4	isoform_170031
CMGC_DYRK-PRP4	isoform_1241
CMGC_DYRK-PRP4	isoform_186445
CMGC_DYRK-PRP4	isoform_189197
CMGC_DYRK-PRP4	isoform_192515
CMGC_DYRK-PRP4	isoform_222756
CMGC_DYRK-PRP4	isoform_224810
CMGC_DYRK-PRP4	isoform_271227
CMGC_DYRK-PRP4	isoform_280814
CMGC_DYRK-PRP4	isoform_281439
CMGC_DYRK-PRP4	isoform_299138
CMGC_DYRK-PRP4	isoform_304624
CMGC_DYRK-PRP4	isoform_305925
CMGC_DYRK-PRP4	isoform_330219
CMGC_DYRK-YAK	isoform_177146
CMGC_DYRK-YAK	isoform_218294
CMGC_GSK	isoform_133322
CMGC_GSK	isoform_134064
CMGC_GSK	isoform_137965
CMGC_GSK	isoform_141315
CMGC_GSK	isoform_141401
CMGC_GSK	isoform_141436
CMGC_GSK	isoform_147451
CMGC_GSK	isoform_148982
CMGC_GSK	isoform_154182
CMGC_GSK	isoform_155797
CMGC_GSK	isoform_157859
CMGC_GSK	isoform_158307
CMGC_GSK	isoform_161664
CMGC_GSK	isoform_162865
CMGC_GSK	isoform_164812
CMGC_GSK	isoform_165397
CMGC_GSK	isoform_174001
CMGC_GSK	isoform_177809
CMGC_GSK	isoform_178989
CMGC_GSK	isoform_180351
CMGC_GSK	isoform_10831
CMGC_GSK	isoform_11035
CMGC_GSK	isoform_11136
CMGC_GSK	isoform_11324
CMGC_GSK	isoform_13318
CMGC_GSK	isoform_13641
CMGC_GSK	isoform_13884
CMGC_GSK	isoform_14163
CMGC_GSK	isoform_14709
CMGC_GSK	isoform_15178
CMGC_GSK	isoform_15224
CMGC_GSK	isoform_15756
CMGC_GSK	isoform_15763
CMGC_GSK	isoform_17438
CMGC_GSK	isoform_189920
CMGC_GSK	isoform_191521
CMGC_GSK	isoform_193551
CMGC_GSK	isoform_194469
CMGC_GSK	isoform_196723
CMGC_GSK	isoform_203214
CMGC_GSK	isoform_207279
CMGC_GSK	isoform_208003
CMGC_GSK	isoform_208698
CMGC_GSK	isoform_209014
CMGC_GSK	isoform_209105
CMGC_GSK	isoform_215904
CMGC_GSK	isoform_226271
CMGC_GSK	isoform_226469
CMGC_GSK	isoform_227219
CMGC_GSK	isoform_228632
CMGC_GSK	isoform_229443
CMGC_GSK	isoform_231095
CMGC_GSK	isoform_246209
CMGC_GSK	isoform_246723
CMGC_GSK	isoform_247177
CMGC_GSK	isoform_248939
CMGC_GSK	isoform_19084
CMGC_GSK	isoform_19087
CMGC_GSK	isoform_20881
CMGC_GSK	isoform_22097
CMGC_GSK	isoform_22195
CMGC_GSK	isoform_23995
CMGC_GSK	isoform_24368
CMGC_GSK	isoform_24734
CMGC_GSK	isoform_256426
CMGC_GSK	isoform_257861
CMGC_GSK	isoform_260338
CMGC_GSK	isoform_263148
CMGC_GSK	isoform_263332
CMGC_GSK	isoform_264240
CMGC_GSK	isoform_265740
CMGC_GSK	isoform_265959
CMGC_GSK	isoform_272547
CMGC_GSK	isoform_274496
CMGC_GSK	isoform_275026
CMGC_GSK	isoform_278671
CMGC_GSK	isoform_280221
CMGC_GSK	isoform_289392
CMGC_GSK	isoform_294924
CMGC_GSK	isoform_299559
CMGC_GSK	isoform_315684
CMGC_GSK	isoform_316351
CMGC_GSK	isoform_318097
CMGC_GSK	isoform_319246
CMGC_GSK	isoform_322308
CMGC_GSK	isoform_324212
CMGC_GSK	isoform_25992
CMGC_GSK	isoform_28716
CMGC_GSK	isoform_30209
CMGC_GSK	isoform_30513
CMGC_GSK	isoform_31646
CMGC_GSK	isoform_32277
CMGC_GSK	isoform_62917
CMGC_GSK	isoform_325169
CMGC_GSK	isoform_326004
CMGC_GSK	isoform_329194
CMGC_GSK	isoform_330832
CMGC_GSK	isoform_335655
CMGC_GSK	isoform_335673
CMGC_GSK	isoform_336246
CMGC_GSK	isoform_336745
CMGC_GSK	isoform_337896
CMGC_GSK	isoform_338603
CMGC_GSK	isoform_338761
CMGC_GSK	isoform_339880
CMGC_GSK	isoform_344507
CMGC_GSK	isoform_346767
CMGC_GSK	isoform_350650
CMGC_GSK	isoform_352533
CMGC_GSK	isoform_33514
CMGC_GSK	isoform_39918
CMGC_GSK	isoform_45368
CMGC_GSK	isoform_7873
CMGC_GSK	isoform_8888
CMGC_GSK	isoform_9111
CMGC_GSK	isoform_9174
CMGC_GSKL	isoform_1440
CMGC_GSKL	isoform_220058
CMGC_GSKL	isoform_337775
CMGC_MAPK	isoform_100507
CMGC_MAPK	isoform_108049
CMGC_MAPK	isoform_134446
CMGC_MAPK	isoform_136026
CMGC_MAPK	isoform_136182
CMGC_MAPK	isoform_140246
CMGC_MAPK	isoform_144263
CMGC_MAPK	isoform_155343
CMGC_MAPK	isoform_155879
CMGC_MAPK	isoform_158872
CMGC_MAPK	isoform_164761
CMGC_MAPK	isoform_169170
CMGC_MAPK	isoform_170299
CMGC_MAPK	isoform_171740
CMGC_MAPK	isoform_172029
CMGC_MAPK	isoform_173931
CMGC_MAPK	isoform_174285
CMGC_MAPK	isoform_175016
CMGC_MAPK	isoform_178764
CMGC_MAPK	isoform_180624
CMGC_MAPK	isoform_183459
CMGC_MAPK	isoform_11231
CMGC_MAPK	isoform_12380
CMGC_MAPK	isoform_12864
CMGC_MAPK	isoform_13321
CMGC_MAPK	isoform_14940
CMGC_MAPK	isoform_15539
CMGC_MAPK	isoform_15582
CMGC_MAPK	isoform_16730
CMGC_MAPK	isoform_184294
CMGC_MAPK	isoform_186745
CMGC_MAPK	isoform_187117
CMGC_MAPK	isoform_190860
CMGC_MAPK	isoform_191076
CMGC_MAPK	isoform_193737
CMGC_MAPK	isoform_193813
CMGC_MAPK	isoform_196991
CMGC_MAPK	isoform_201713
CMGC_MAPK	isoform_205478
CMGC_MAPK	isoform_207972
CMGC_MAPK	isoform_208648
CMGC_MAPK	isoform_209342
CMGC_MAPK	isoform_212808
CMGC_MAPK	isoform_217372
CMGC_MAPK	isoform_218216
CMGC_MAPK	isoform_220804
CMGC_MAPK	isoform_221082
CMGC_MAPK	isoform_221215
CMGC_MAPK	isoform_228241
CMGC_MAPK	isoform_229314
CMGC_MAPK	isoform_233446
CMGC_MAPK	isoform_240737
CMGC_MAPK	isoform_242191
CMGC_MAPK	isoform_244693
CMGC_MAPK	isoform_249932
CMGC_MAPK	isoform_253292
CMGC_MAPK	isoform_21747
CMGC_MAPK	isoform_22202
CMGC_MAPK	isoform_22506
CMGC_MAPK	isoform_23505
CMGC_MAPK	isoform_23646
CMGC_MAPK	isoform_24260
CMGC_MAPK	isoform_262268
CMGC_MAPK	isoform_263365
CMGC_MAPK	isoform_266923
CMGC_MAPK	isoform_266938
CMGC_MAPK	isoform_268359
CMGC_MAPK	isoform_269123
CMGC_MAPK	isoform_270370
CMGC_MAPK	isoform_271413
CMGC_MAPK	isoform_280204
CMGC_MAPK	isoform_283531
CMGC_MAPK	isoform_283551
CMGC_MAPK	isoform_284086
CMGC_MAPK	isoform_289654
CMGC_MAPK	isoform_294169
CMGC_MAPK	isoform_295594
CMGC_MAPK	isoform_299433
CMGC_MAPK	isoform_302011
CMGC_MAPK	isoform_302894
CMGC_MAPK	isoform_302989
CMGC_MAPK	isoform_307973
CMGC_MAPK	isoform_309324
CMGC_MAPK	isoform_314911
CMGC_MAPK	isoform_317774
CMGC_MAPK	isoform_319960
CMGC_MAPK	isoform_26503
CMGC_MAPK	isoform_26854
CMGC_MAPK	isoform_27899
CMGC_MAPK	isoform_28728
CMGC_MAPK	isoform_29293
CMGC_MAPK	isoform_29820
CMGC_MAPK	isoform_31464
CMGC_MAPK	isoform_31662
CMGC_MAPK	isoform_52706
CMGC_MAPK	isoform_54160
CMGC_MAPK	isoform_5168
CMGC_MAPK	isoform_5412
CMGC_MAPK	isoform_5872
CMGC_MAPK	isoform_5913
CMGC_MAPK	isoform_5970
CMGC_MAPK	isoform_6014
CMGC_MAPK	isoform_6381
CMGC_MAPK	isoform_326154
CMGC_MAPK	isoform_329635
CMGC_MAPK	isoform_333042
CMGC_MAPK	isoform_333771
CMGC_MAPK	isoform_337481
CMGC_MAPK	isoform_339269
CMGC_MAPK	isoform_340571
CMGC_MAPK	isoform_341212
CMGC_MAPK	isoform_345077
CMGC_MAPK	isoform_346448
CMGC_MAPK	isoform_347383
CMGC_MAPK	isoform_353343
CMGC_MAPK	isoform_354054
CMGC_MAPK	isoform_32598
CMGC_MAPK	isoform_33125
CMGC_MAPK	isoform_33193
CMGC_MAPK	isoform_33524
CMGC_MAPK	isoform_33587
CMGC_MAPK	isoform_33748
CMGC_MAPK	isoform_34855
CMGC_MAPK	isoform_35670
CMGC_MAPK	isoform_35740
CMGC_MAPK	isoform_36428
CMGC_MAPK	isoform_36762
CMGC_MAPK	isoform_37371
CMGC_MAPK	isoform_40976
CMGC_MAPK	isoform_42555
CMGC_MAPK	isoform_43653
CMGC_MAPK	isoform_47100
CMGC_MAPK	isoform_47265
CMGC_MAPK	isoform_65373
CMGC_MAPK	isoform_68517
CMGC_MAPK	isoform_72315
CMGC_MAPK	isoform_74232
CMGC_MAPK	isoform_79421
CMGC_MAPK	isoform_80311
CMGC_MAPK	isoform_80376
CMGC_MAPK	isoform_91071
CMGC_MAPK	isoform_6778
CMGC_MAPK	isoform_6849
CMGC_MAPK	isoform_8917
CMGC_MAPK	isoform_9608
CMGC_RCK	isoform_176499
CMGC_RCK	isoform_10227
CMGC_RCK	isoform_10409
CMGC_RCK	isoform_10567
CMGC_RCK	isoform_11365
CMGC_RCK	isoform_11381
CMGC_RCK	isoform_12115
CMGC_RCK	isoform_12438
CMGC_RCK	isoform_14060
CMGC_RCK	isoform_14202
CMGC_RCK	isoform_189213
CMGC_RCK	isoform_217288
CMGC_RCK	isoform_279729
CMGC_RCK	isoform_285276
CMGC_RCK	isoform_292500
CMGC_RCK	isoform_294915
CMGC_RCK	isoform_61884
CMGC_RCK	isoform_331502
CMGC_RCK	isoform_337482
CMGC_RCK	isoform_345392
CMGC_RCK	isoform_348236
CMGC_RCK	isoform_40120
CMGC_SRPK	isoform_178391
CMGC_SRPK	isoform_18190
CMGC_SRPK	isoform_187680
CMGC_SRPK	isoform_213431
CMGC_SRPK	isoform_229714
CMGC_SRPK	isoform_25210
CMGC_SRPK	isoform_51594
CMGC_SRPK	isoform_61160
CMGC_SRPK	isoform_62359
CMGC_SRPK	isoform_338152
CMGC_SRPK	isoform_48793
Group-Cr-1	isoform_202934
Group-Cr-1	isoform_23176
Group-Cr-1	isoform_303278
Group-Cr-1	isoform_35345
Group-Pl-3	isoform_138542
Group-Pl-3	isoform_154221
Group-Pl-3	isoform_162346
Group-Pl-3	isoform_201775
Group-Pl-3	isoform_210911
Group-Pl-3	isoform_231524
Group-Pl-3	isoform_251790
Group-Pl-3	isoform_262986
Group-Pl-3	isoform_271528
Group-Pl-3	isoform_298600
Group-Pl-3	isoform_52709
Group-Pl-3	isoform_342866
Group-Pl-3	isoform_344897
Group-Pl-3	isoform_6641
Group-Pl-4	isoform_10375
Group-Pl-4	isoform_10762
Group-Pl-4	isoform_17262
Group-Pl-4	isoform_17933
Group-Pl-4	isoform_184658
Group-Pl-4	isoform_185359
Group-Pl-4	isoform_191032
Group-Pl-4	isoform_193268
Group-Pl-4	isoform_193962
Group-Pl-4	isoform_194643
Group-Pl-4	isoform_201127
Group-Pl-4	isoform_211501
Group-Pl-4	isoform_221371
Group-Pl-4	isoform_223430
Group-Pl-4	isoform_229526
Group-Pl-4	isoform_237089
Group-Pl-4	isoform_244248
Group-Pl-4	isoform_246030
Group-Pl-4	isoform_18409
Group-Pl-4	isoform_18582
Group-Pl-4	isoform_23815
Group-Pl-4	isoform_255995
Group-Pl-4	isoform_262131
Group-Pl-4	isoform_270795
Group-Pl-4	isoform_25463
Group-Pl-4	isoform_30101
Group-Pl-4	isoform_54928
Group-Pl-4	isoform_6050
Group-Pl-4	isoform_6119
Group-Pl-4	isoform_333305
Group-Pl-4	isoform_338801
Group-Pl-4	isoform_350011
Group-Pl-4	isoform_36933
Group-Pl-4	isoform_41208
Group-Pl-4	isoform_78285
Group-Pl-4	isoform_8945
Group-Pl-4	isoform_9969
IRE1	isoform_198119
IRE1	isoform_259342
IRE1	isoform_4151
NAK	isoform_142155
NAK	isoform_158437
NAK	isoform_189045
NAK	isoform_225672
NAK	isoform_243705
NAK	isoform_309663
NAK	isoform_52917
NAK	isoform_58090
NAK	isoform_4998
NAK	isoform_326251
NAK	isoform_47276
NAK	isoform_7101
NAK	isoform_7705
NAK	isoform_8531
NEK	isoform_135590
NEK	isoform_136284
NEK	isoform_147326
NEK	isoform_174959
NEK	isoform_175003
NEK	isoform_12215
NEK	isoform_1120
NEK	isoform_1268
NEK	isoform_1614
NEK	isoform_1773
NEK	isoform_199205
NEK	isoform_201819
NEK	isoform_207108
NEK	isoform_207296
NEK	isoform_210000
NEK	isoform_213374
NEK	isoform_235138
NEK	isoform_237151
NEK	isoform_237152
NEK	isoform_239480
NEK	isoform_1976
NEK	isoform_2245
NEK	isoform_2313
NEK	isoform_2390
NEK	isoform_272662
NEK	isoform_275926
NEK	isoform_276027
NEK	isoform_278491
NEK	isoform_281438
NEK	isoform_281959
NEK	isoform_282113
NEK	isoform_286402
NEK	isoform_297718
NEK	isoform_298424
NEK	isoform_304240
NEK	isoform_304843
NEK	isoform_314097
NEK	isoform_335661
NEK	isoform_336354
NEK	isoform_342379
PEK_GCN2	isoform_249640
RLK-Pelle_C-LEC	isoform_152446
RLK-Pelle_C-LEC	isoform_293040
RLK-Pelle_C-LEC	isoform_316250
RLK-Pelle_C-LEC	isoform_28641
RLK-Pelle_C-LEC	isoform_29447
RLK-Pelle_C-LEC	isoform_31406
RLK-Pelle_C-LEC	isoform_51230
RLK-Pelle_CR4L	isoform_137385
RLK-Pelle_CR4L	isoform_160913
RLK-Pelle_CR4L	isoform_163113
RLK-Pelle_CR4L	isoform_169305
RLK-Pelle_CR4L	isoform_169949
RLK-Pelle_CR4L	isoform_13488
RLK-Pelle_CR4L	isoform_14729
RLK-Pelle_CR4L	isoform_14820
RLK-Pelle_CR4L	isoform_16489
RLK-Pelle_CR4L	isoform_200265
RLK-Pelle_CR4L	isoform_209355
RLK-Pelle_CR4L	isoform_215285
RLK-Pelle_CR4L	isoform_215985
RLK-Pelle_CR4L	isoform_236861
RLK-Pelle_CR4L	isoform_20166
RLK-Pelle_CR4L	isoform_20674
RLK-Pelle_CR4L	isoform_21135
RLK-Pelle_CR4L	isoform_259072
RLK-Pelle_CR4L	isoform_271739
RLK-Pelle_CR4L	isoform_303494
RLK-Pelle_CR4L	isoform_311276
RLK-Pelle_CR4L	isoform_315067
RLK-Pelle_CR4L	isoform_321918
RLK-Pelle_CR4L	isoform_6037
RLK-Pelle_CR4L	isoform_349839
RLK-Pelle_CR4L	isoform_352790
RLK-Pelle_CrRLK1L-1	isoform_133935
RLK-Pelle_CrRLK1L-1	isoform_137071
RLK-Pelle_CrRLK1L-1	isoform_140789
RLK-Pelle_CrRLK1L-1	isoform_142663
RLK-Pelle_CrRLK1L-1	isoform_144917
RLK-Pelle_CrRLK1L-1	isoform_146076
RLK-Pelle_CrRLK1L-1	isoform_146360
RLK-Pelle_CrRLK1L-1	isoform_159868
RLK-Pelle_CrRLK1L-1	isoform_164386
RLK-Pelle_CrRLK1L-1	isoform_167808
RLK-Pelle_CrRLK1L-1	isoform_169604
RLK-Pelle_CrRLK1L-1	isoform_171825
RLK-Pelle_CrRLK1L-1	isoform_177799
RLK-Pelle_CrRLK1L-1	isoform_178096
RLK-Pelle_CrRLK1L-1	isoform_178776
RLK-Pelle_CrRLK1L-1	isoform_179891
RLK-Pelle_CrRLK1L-1	isoform_181167
RLK-Pelle_CrRLK1L-1	isoform_182295
RLK-Pelle_CrRLK1L-1	isoform_10623
RLK-Pelle_CrRLK1L-1	isoform_1055
RLK-Pelle_CrRLK1L-1	isoform_1197
RLK-Pelle_CrRLK1L-1	isoform_1226
RLK-Pelle_CrRLK1L-1	isoform_1229
RLK-Pelle_CrRLK1L-1	isoform_1331
RLK-Pelle_CrRLK1L-1	isoform_1492
RLK-Pelle_CrRLK1L-1	isoform_1738
RLK-Pelle_CrRLK1L-1	isoform_1775
RLK-Pelle_CrRLK1L-1	isoform_188346
RLK-Pelle_CrRLK1L-1	isoform_189405
RLK-Pelle_CrRLK1L-1	isoform_195428
RLK-Pelle_CrRLK1L-1	isoform_196055
RLK-Pelle_CrRLK1L-1	isoform_198124
RLK-Pelle_CrRLK1L-1	isoform_199267
RLK-Pelle_CrRLK1L-1	isoform_204731
RLK-Pelle_CrRLK1L-1	isoform_211532
RLK-Pelle_CrRLK1L-1	isoform_229324
RLK-Pelle_CrRLK1L-1	isoform_233249
RLK-Pelle_CrRLK1L-1	isoform_247346
RLK-Pelle_CrRLK1L-1	isoform_248267
RLK-Pelle_CrRLK1L-1	isoform_253733
RLK-Pelle_CrRLK1L-1	isoform_1902
RLK-Pelle_CrRLK1L-1	isoform_265807
RLK-Pelle_CrRLK1L-1	isoform_267699
RLK-Pelle_CrRLK1L-1	isoform_269785
RLK-Pelle_CrRLK1L-1	isoform_277795
RLK-Pelle_CrRLK1L-1	isoform_279706
RLK-Pelle_CrRLK1L-1	isoform_283648
RLK-Pelle_CrRLK1L-1	isoform_287495
RLK-Pelle_CrRLK1L-1	isoform_295298
RLK-Pelle_CrRLK1L-1	isoform_296189
RLK-Pelle_CrRLK1L-1	isoform_299416
RLK-Pelle_CrRLK1L-1	isoform_310917
RLK-Pelle_CrRLK1L-1	isoform_312196
RLK-Pelle_CrRLK1L-1	isoform_314182
RLK-Pelle_CrRLK1L-1	isoform_321239
RLK-Pelle_CrRLK1L-1	isoform_324436
RLK-Pelle_CrRLK1L-1	isoform_30896
RLK-Pelle_CrRLK1L-1	isoform_2603
RLK-Pelle_CrRLK1L-1	isoform_55806
RLK-Pelle_CrRLK1L-1	isoform_60706
RLK-Pelle_CrRLK1L-1	isoform_63725
RLK-Pelle_CrRLK1L-1	isoform_329596
RLK-Pelle_CrRLK1L-1	isoform_331556
RLK-Pelle_CrRLK1L-1	isoform_338561
RLK-Pelle_CrRLK1L-1	isoform_341297
RLK-Pelle_CrRLK1L-1	isoform_344155
RLK-Pelle_CrRLK1L-1	isoform_348460
RLK-Pelle_CrRLK1L-1	isoform_351474
RLK-Pelle_CrRLK1L-1	isoform_351701
RLK-Pelle_CrRLK1L-1	isoform_38711
RLK-Pelle_CrRLK1L-1	isoform_47434
RLK-Pelle_CrRLK1L-1	isoform_65719
RLK-Pelle_CrRLK1L-1	isoform_65805
RLK-Pelle_CrRLK1L-1	isoform_68937
RLK-Pelle_CrRLK1L-1	isoform_71088
RLK-Pelle_CrRLK1L-1	isoform_8146
RLK-Pelle_CrRLK1L-1	isoform_918
RLK-Pelle_DLSV	isoform_137192
RLK-Pelle_DLSV	isoform_137587
RLK-Pelle_DLSV	isoform_143771
RLK-Pelle_DLSV	isoform_149288
RLK-Pelle_DLSV	isoform_152861
RLK-Pelle_DLSV	isoform_158728
RLK-Pelle_DLSV	isoform_167016
RLK-Pelle_DLSV	isoform_176580
RLK-Pelle_DLSV	isoform_176865
RLK-Pelle_DLSV	isoform_177927
RLK-Pelle_DLSV	isoform_178796
RLK-Pelle_DLSV	isoform_180198
RLK-Pelle_DLSV	isoform_180363
RLK-Pelle_DLSV	isoform_10714
RLK-Pelle_DLSV	isoform_12219
RLK-Pelle_DLSV	isoform_12400
RLK-Pelle_DLSV	isoform_12617
RLK-Pelle_DLSV	isoform_12673
RLK-Pelle_DLSV	isoform_12764
RLK-Pelle_DLSV	isoform_12902
RLK-Pelle_DLSV	isoform_1151
RLK-Pelle_DLSV	isoform_16389
RLK-Pelle_DLSV	isoform_17284
RLK-Pelle_DLSV	isoform_184458
RLK-Pelle_DLSV	isoform_185891
RLK-Pelle_DLSV	isoform_187217
RLK-Pelle_DLSV	isoform_189876
RLK-Pelle_DLSV	isoform_190648
RLK-Pelle_DLSV	isoform_194985
RLK-Pelle_DLSV	isoform_197520
RLK-Pelle_DLSV	isoform_200943
RLK-Pelle_DLSV	isoform_201676
RLK-Pelle_DLSV	isoform_206750
RLK-Pelle_DLSV	isoform_209630
RLK-Pelle_DLSV	isoform_213710
RLK-Pelle_DLSV	isoform_215636
RLK-Pelle_DLSV	isoform_219077
RLK-Pelle_DLSV	isoform_231120
RLK-Pelle_DLSV	isoform_235621
RLK-Pelle_DLSV	isoform_240853
RLK-Pelle_DLSV	isoform_241974
RLK-Pelle_DLSV	isoform_242220
RLK-Pelle_DLSV	isoform_243984
RLK-Pelle_DLSV	isoform_245603
RLK-Pelle_DLSV	isoform_256074
RLK-Pelle_DLSV	isoform_258563
RLK-Pelle_DLSV	isoform_260244
RLK-Pelle_DLSV	isoform_266570
RLK-Pelle_DLSV	isoform_271581
RLK-Pelle_DLSV	isoform_276297
RLK-Pelle_DLSV	isoform_278275
RLK-Pelle_DLSV	isoform_290451
RLK-Pelle_DLSV	isoform_291217
RLK-Pelle_DLSV	isoform_295915
RLK-Pelle_DLSV	isoform_296634
RLK-Pelle_DLSV	isoform_300351
RLK-Pelle_DLSV	isoform_303237
RLK-Pelle_DLSV	isoform_303713
RLK-Pelle_DLSV	isoform_303842
RLK-Pelle_DLSV	isoform_307747
RLK-Pelle_DLSV	isoform_308167
RLK-Pelle_DLSV	isoform_309182
RLK-Pelle_DLSV	isoform_310156
RLK-Pelle_DLSV	isoform_313979
RLK-Pelle_DLSV	isoform_319051
RLK-Pelle_DLSV	isoform_31576
RLK-Pelle_DLSV	isoform_51623
RLK-Pelle_DLSV	isoform_51866
RLK-Pelle_DLSV	isoform_326259
RLK-Pelle_DLSV	isoform_326986
RLK-Pelle_DLSV	isoform_328701
RLK-Pelle_DLSV	isoform_329255
RLK-Pelle_DLSV	isoform_329812
RLK-Pelle_DLSV	isoform_334179
RLK-Pelle_DLSV	isoform_337094
RLK-Pelle_DLSV	isoform_342257
RLK-Pelle_DLSV	isoform_342380
RLK-Pelle_DLSV	isoform_342745
RLK-Pelle_DLSV	isoform_345151
RLK-Pelle_DLSV	isoform_346088
RLK-Pelle_DLSV	isoform_347328
RLK-Pelle_DLSV	isoform_352132
RLK-Pelle_DLSV	isoform_353644
RLK-Pelle_DLSV	isoform_34908
RLK-Pelle_DLSV	isoform_36033
RLK-Pelle_DLSV	isoform_36500
RLK-Pelle_DLSV	isoform_36654
RLK-Pelle_DLSV	isoform_37144
RLK-Pelle_DLSV	isoform_39849
RLK-Pelle_DLSV	isoform_40256
RLK-Pelle_DLSV	isoform_40447
RLK-Pelle_DLSV	isoform_41241
RLK-Pelle_DLSV	isoform_41955
RLK-Pelle_DLSV	isoform_42853
RLK-Pelle_DLSV	isoform_43411
RLK-Pelle_DLSV	isoform_45807
RLK-Pelle_DLSV	isoform_46096
RLK-Pelle_DLSV	isoform_46244
RLK-Pelle_DLSV	isoform_46733
RLK-Pelle_DLSV	isoform_48183
RLK-Pelle_DLSV	isoform_49635
RLK-Pelle_DLSV	isoform_68140
RLK-Pelle_DLSV	isoform_90974
RLK-Pelle_DLSV	isoform_8684
RLK-Pelle_DLSV	isoform_9487
RLK-Pelle_DLSV	isoform_9692
RLK-Pelle_DSLV	isoform_298386
RLK-Pelle_Extensin	isoform_134265
RLK-Pelle_Extensin	isoform_137298
RLK-Pelle_Extensin	isoform_138420
RLK-Pelle_Extensin	isoform_138480
RLK-Pelle_Extensin	isoform_148516
RLK-Pelle_Extensin	isoform_149859
RLK-Pelle_Extensin	isoform_158518
RLK-Pelle_Extensin	isoform_159755
RLK-Pelle_Extensin	isoform_14218
RLK-Pelle_Extensin	isoform_14262
RLK-Pelle_Extensin	isoform_1286
RLK-Pelle_Extensin	isoform_194242
RLK-Pelle_Extensin	isoform_210229
RLK-Pelle_Extensin	isoform_215678
RLK-Pelle_Extensin	isoform_217985
RLK-Pelle_Extensin	isoform_218292
RLK-Pelle_Extensin	isoform_225454
RLK-Pelle_Extensin	isoform_233222
RLK-Pelle_Extensin	isoform_244799
RLK-Pelle_Extensin	isoform_18512
RLK-Pelle_Extensin	isoform_21887
RLK-Pelle_Extensin	isoform_22838
RLK-Pelle_Extensin	isoform_270787
RLK-Pelle_Extensin	isoform_271160
RLK-Pelle_Extensin	isoform_278855
RLK-Pelle_Extensin	isoform_281250
RLK-Pelle_Extensin	isoform_288358
RLK-Pelle_Extensin	isoform_293342
RLK-Pelle_Extensin	isoform_294923
RLK-Pelle_Extensin	isoform_304729
RLK-Pelle_Extensin	isoform_311691
RLK-Pelle_Extensin	isoform_312856
RLK-Pelle_Extensin	isoform_313898
RLK-Pelle_Extensin	isoform_319720
RLK-Pelle_Extensin	isoform_26968
RLK-Pelle_Extensin	isoform_50615
RLK-Pelle_Extensin	isoform_328298
RLK-Pelle_Extensin	isoform_333831
RLK-Pelle_Extensin	isoform_334128
RLK-Pelle_Extensin	isoform_334589
RLK-Pelle_Extensin	isoform_338128
RLK-Pelle_Extensin	isoform_349387
RLK-Pelle_Extensin	isoform_349475
RLK-Pelle_Extensin	isoform_350098
RLK-Pelle_Extensin	isoform_352617
RLK-Pelle_Extensin	isoform_353296
RLK-Pelle_Extensin	isoform_48054
RLK-Pelle_Extensin	isoform_8008
RLK-Pelle_Extensin	isoform_9271
RLK-Pelle_L-LEC	isoform_101163
RLK-Pelle_L-LEC	isoform_134926
RLK-Pelle_L-LEC	isoform_135516
RLK-Pelle_L-LEC	isoform_135661
RLK-Pelle_L-LEC	isoform_140829
RLK-Pelle_L-LEC	isoform_149701
RLK-Pelle_L-LEC	isoform_156106
RLK-Pelle_L-LEC	isoform_157880
RLK-Pelle_L-LEC	isoform_163479
RLK-Pelle_L-LEC	isoform_164949
RLK-Pelle_L-LEC	isoform_168267
RLK-Pelle_L-LEC	isoform_170014
RLK-Pelle_L-LEC	isoform_174110
RLK-Pelle_L-LEC	isoform_176640
RLK-Pelle_L-LEC	isoform_177812
RLK-Pelle_L-LEC	isoform_179328
RLK-Pelle_L-LEC	isoform_179964
RLK-Pelle_L-LEC	isoform_180707
RLK-Pelle_L-LEC	isoform_181659
RLK-Pelle_L-LEC	isoform_10467
RLK-Pelle_L-LEC	isoform_10488
RLK-Pelle_L-LEC	isoform_10507
RLK-Pelle_L-LEC	isoform_12155
RLK-Pelle_L-LEC	isoform_12338
RLK-Pelle_L-LEC	isoform_14745
RLK-Pelle_L-LEC	isoform_14997
RLK-Pelle_L-LEC	isoform_15122
RLK-Pelle_L-LEC	isoform_184181
RLK-Pelle_L-LEC	isoform_185924
RLK-Pelle_L-LEC	isoform_189675
RLK-Pelle_L-LEC	isoform_190327
RLK-Pelle_L-LEC	isoform_190979
RLK-Pelle_L-LEC	isoform_192512
RLK-Pelle_L-LEC	isoform_193689
RLK-Pelle_L-LEC	isoform_194680
RLK-Pelle_L-LEC	isoform_196146
RLK-Pelle_L-LEC	isoform_198365
RLK-Pelle_L-LEC	isoform_201115
RLK-Pelle_L-LEC	isoform_205193
RLK-Pelle_L-LEC	isoform_205214
[truncated: 2,952 more rows]
