# Supplementary material for: Full-length transcriptome analysis of Adiantum flabellulatum gametophyte
Source: PeerJ. 2022 Mar 9;10:e13079. doi: 10.7717/peerj.13079 (PMC8917799; doi:10.7717/peerj.13079)
Supplement: Supplemental Information 11 [file peerj-10-13079-s011.xlsx]

## Sheet: Sheet1
Table S11 Processing and analysis of PCR results
Gene ID	Gene Name	2-⊿⊿Ct
		0	0	0	10	10	10	500	500	500	10000	10000	10000
isoform_17547	Glutamyl-tRNA reductase (HemA)	1	1.67	0.81	5.17	3.87	3.37	3.14	2.7	0.87	0.63	3.25	0.43
isoform_31009	Glutamate-1-semialdehyde-2,1-aminomutase (HemL)	1	2	1.07	7.35	6.75	10.64	7.37	2.57	2.19	1.69	8.14	0.84
isoform_34076	Porphobilinogen synthase (HemB)	1	0.91	0.56	1.77	1.23	2.2	0.68	0.35	0.27	0.3	1.3	0.21
isoform_274635	Magnesium chelatase H subunit (CHLH)	1	1.74	1.75	9.58	8.74	6.1	8.26	5.79	2.17	0.94	7.43	1.3
isoform_37517	Magnesium chelatase D subunit (CHLD)	1	1.43	0.99	2.7	2.77	2.9	1.37	1.34	0.86	0.56	1.14	0.6
isoform_26255	Mg-Proto Ⅸ monomethyl ester cyclase (CRD)	1	1.14	0.55	3.66	1.96	2.98	1.68	1.47	0.92	0.53	1.72	0.47
isoform_35563	3,8-divinyl Chlide 8-vinyl reductase (DVR)	1	0.67	0.33	4.61	1.98	4.45	1.49	0.57	0.82	0.45	2.79	0.8
isoform_30702	Protochlorophyllide oxidoreductase (POR)	1	1.58	1.2	3.44	3.11	2.96	1.18	0.39	0.4	0.24	0.71	0.51
isoform_8394	Chlorophyllide a oxygenase (CAO)	1	0.55	0.56	9.44	4.16	12.86	6.46	2.3	0.77	0.91	3.52	1.84
Gene ID	Gene Name	0		10		500		10000
		average	Std. Deviation	average	Std. Deviation	average	Std. Deviation	average	Std. Deviation
isoform_17547	Glutamyl-tRNA reductase (HemA)	1.16	0.368872	4.13667	0.758654	2.23667	0.982932	1.43667	1.28482
isoform_31009	Glutamate-1-semialdehyde-2,1-aminomutase (HemL)	1.35667	0.455802	8.24667	1.70998	4.04333	2.35742	3.55667	3.25943
isoform_34076	Porphobilinogen synthase (HemB)	0.823333	0.189795	1.73333	0.396849	0.433333	0.177451	0.603333	0.493986
isoform_274635	Magnesium chelatase H subunit (CHLH)	1.49667	0.35122	8.14	1.4827	5.40667	2.50096	3.22333	2.97819
isoform_37517	Magnesium chelatase D subunit (CHLD)	1.14	0.205102	2.79	0.0828654	1.19	0.233666	0.766667	0.264491
isoform_26255	Mg-Proto Ⅸ monomethyl ester cyclase (CRD)	0.896667	0.251705	2.86667	0.698634	1.35667	0.320451	0.906667	0.575635
isoform_35563	3,8-divinyl Chlide 8-vinyl reductase (DVR)	0.666667	0.273537	3.68	1.20385	0.96	0.388416	1.34667	1.03054
isoform_30702	Protochlorophyllide oxidoreductase (POR)	1.26	0.240555	3.17	0.200499	0.656667	0.370075	0.486667	0.192585
isoform_8394	Chlorophyllide a oxygenase (CAO)	0.703333	0.209815	8.82	3.57871	3.17667	2.40422	2.09	1.08009
Gene ID	Gene Name	0		10		500		10000
isoform_17547	Glutamyl-tRNA reductase (HemA)	1.16±0.369a		4.137±0.759b		2.237±0.983ab		1.437±1.285a
isoform_31009	Glutamate-1-semialdehyde-2,1-aminomutase (HemL)	1.357±0.456a		8.247±1.71b		4.043±2.357ab		3.557±3.259ab
isoform_34076	Porphobilinogen synthase (HemB)	0.823±0.19a		1.733±0.397b		0.433±0.177a		0.603±0.494a
isoform_274635	Magnesium chelatase H subunit (CHLH)	1.497±0.351a		8.14±1.483b		5.407±2.501ab		3.223±2.978a
isoform_37517	Magnesium chelatase D subunit (CHLD)	1.14±0.205a		2.79±0.083b		1.19±0.234a		0.767±0.264a
isoform_26255	Mg-Proto Ⅸ monomethyl ester cyclase (CRD)	0.897±0.252a		2.867±0.699b		1.3577±0.32a		0.907±0.576a
isoform_35563	3,8-divinyl Chlide 8-vinyl reductase (DVR)	0.667±0.274a		3.68±1.204b		0.96±0.388a		1.347±1.031a
isoform_30702	Protochlorophyllide oxidoreductase (POR)	1.26±0.241a		3.17±0.2b		0.657±0.37c		0.487±0.193c
isoform_8394	Chlorophyllide a oxygenase (CAO)	0.703±0.21a		8.82±3.579b		3.177±2.404a		2.09±1.08a
